# Supplementary material
Source: ML conference proceedings conference paper supplement (https://openaccess.thecvf.com/content/cvpr_2017/html/Su_Deep_Video_Deblurring_2017_CVPR_paper.html)
Supplement: Supplementary file 1 [file Su_Deep_Video_Deblurring_2017_CVPR_supplemental.pdf]

# Deep Video Deblurring for Hand-held Cameras

Supplementary Material

# Outline

- Full-size images in fig. 4
- Full-size images in fig. 6
- Additional comparisons with Cho [3], Kim and Lee [15], and WFA [5]
- Additional results
- Analysis on the DeBlurNet

- “**Cho [3]**”: S. Cho, J. Wang, and S. Lee. Video deblurring for hand-held cameras using patch-based synthesis. *ACM Transactions on Graphics (TOG)*, 31(4):64, 2012.
- “**Kim and Lee [15]**”: T. H. Kim and K. M. Lee. Generalized video deblurring for dynamic scenes. In *Proc. IEEE Conf. Comput. Vis. Pattern Recognit. (CVPR)*, 2015.
- “**WFA [5]**”: M. Delbracio and G. Sapiro. Hand-held video deblurring via efficient fourier aggregation. *IEEE Transactions on Computational Imaging*, 1(4):270–283, 2015.
- “**L0Deblur [48]**”: L. Xu, S. Zheng, and J. Jia. Unnatural l0 sparse representation for natural image deblurring. In *Proceedings of the IEEE Conference on Computer Vision and Pattern Recognition*, pages 1107–1114, 2013.
- “**Neural [1]**”: A. Chakrabarti. A neural approach to blind motion deblurring. *arXiv preprint arXiv:1603.04771*, 2016.

Full-size Images in Fig. 4



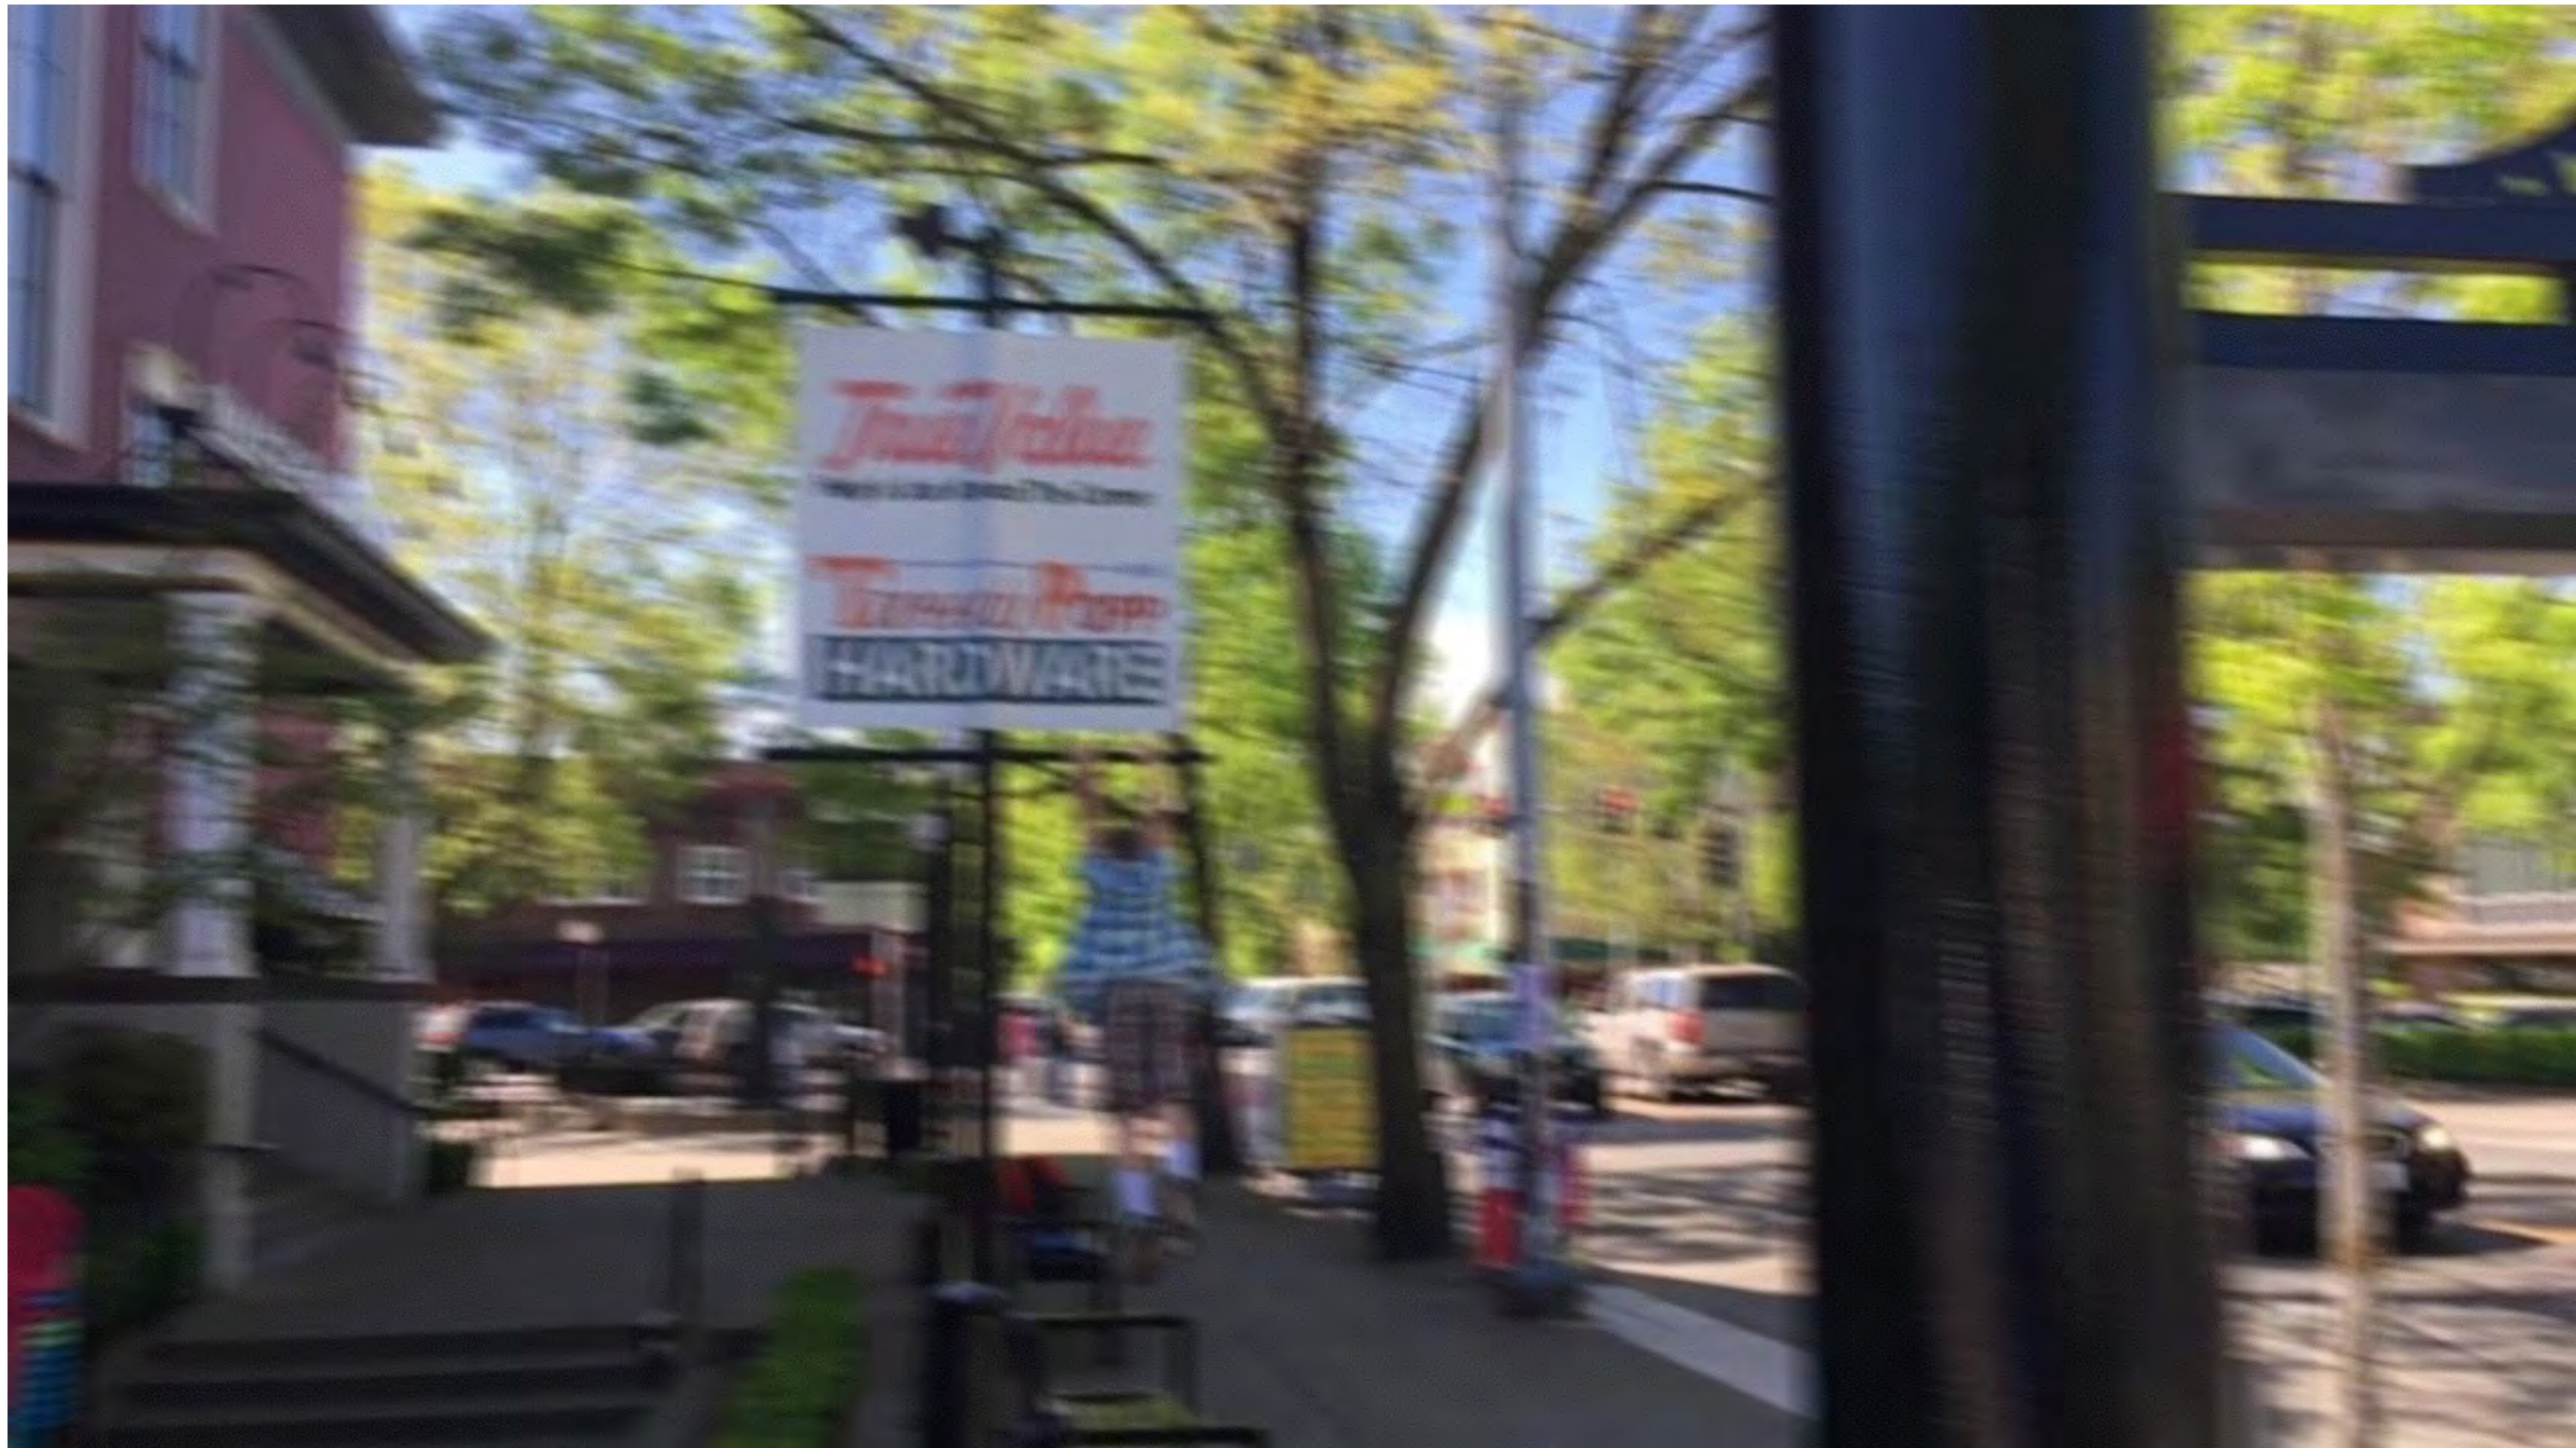

input



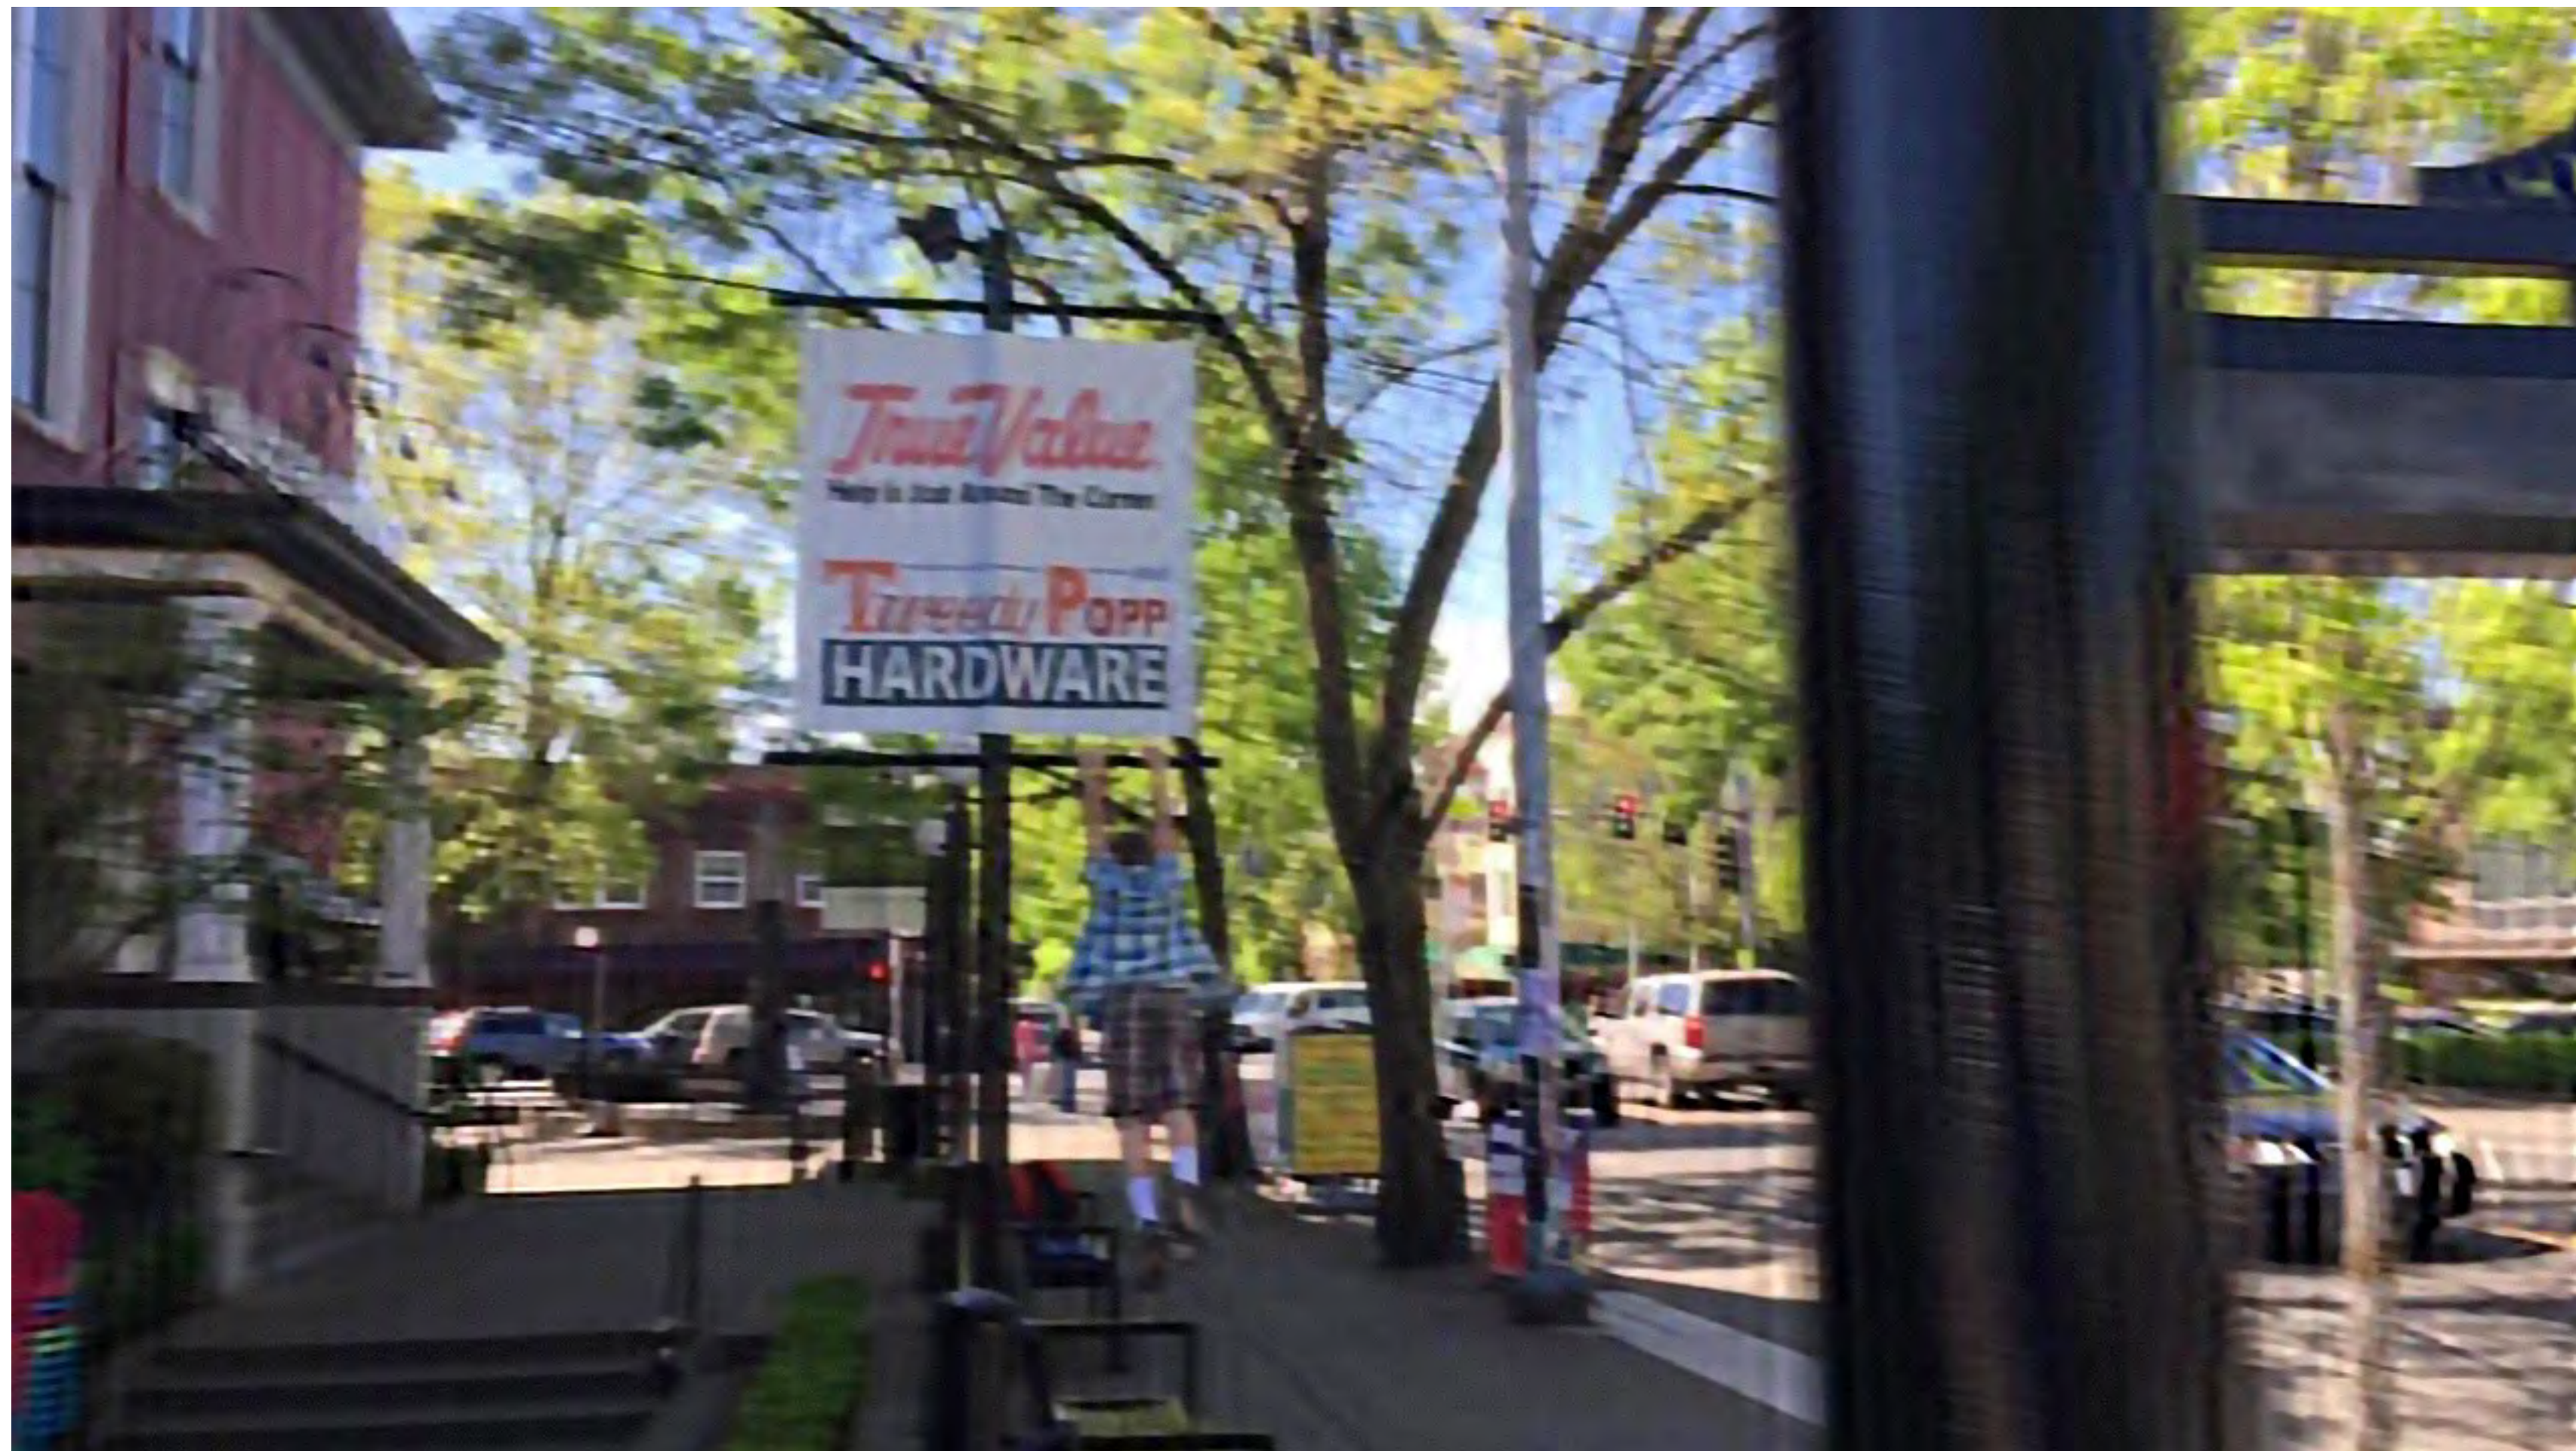

PSDeblur



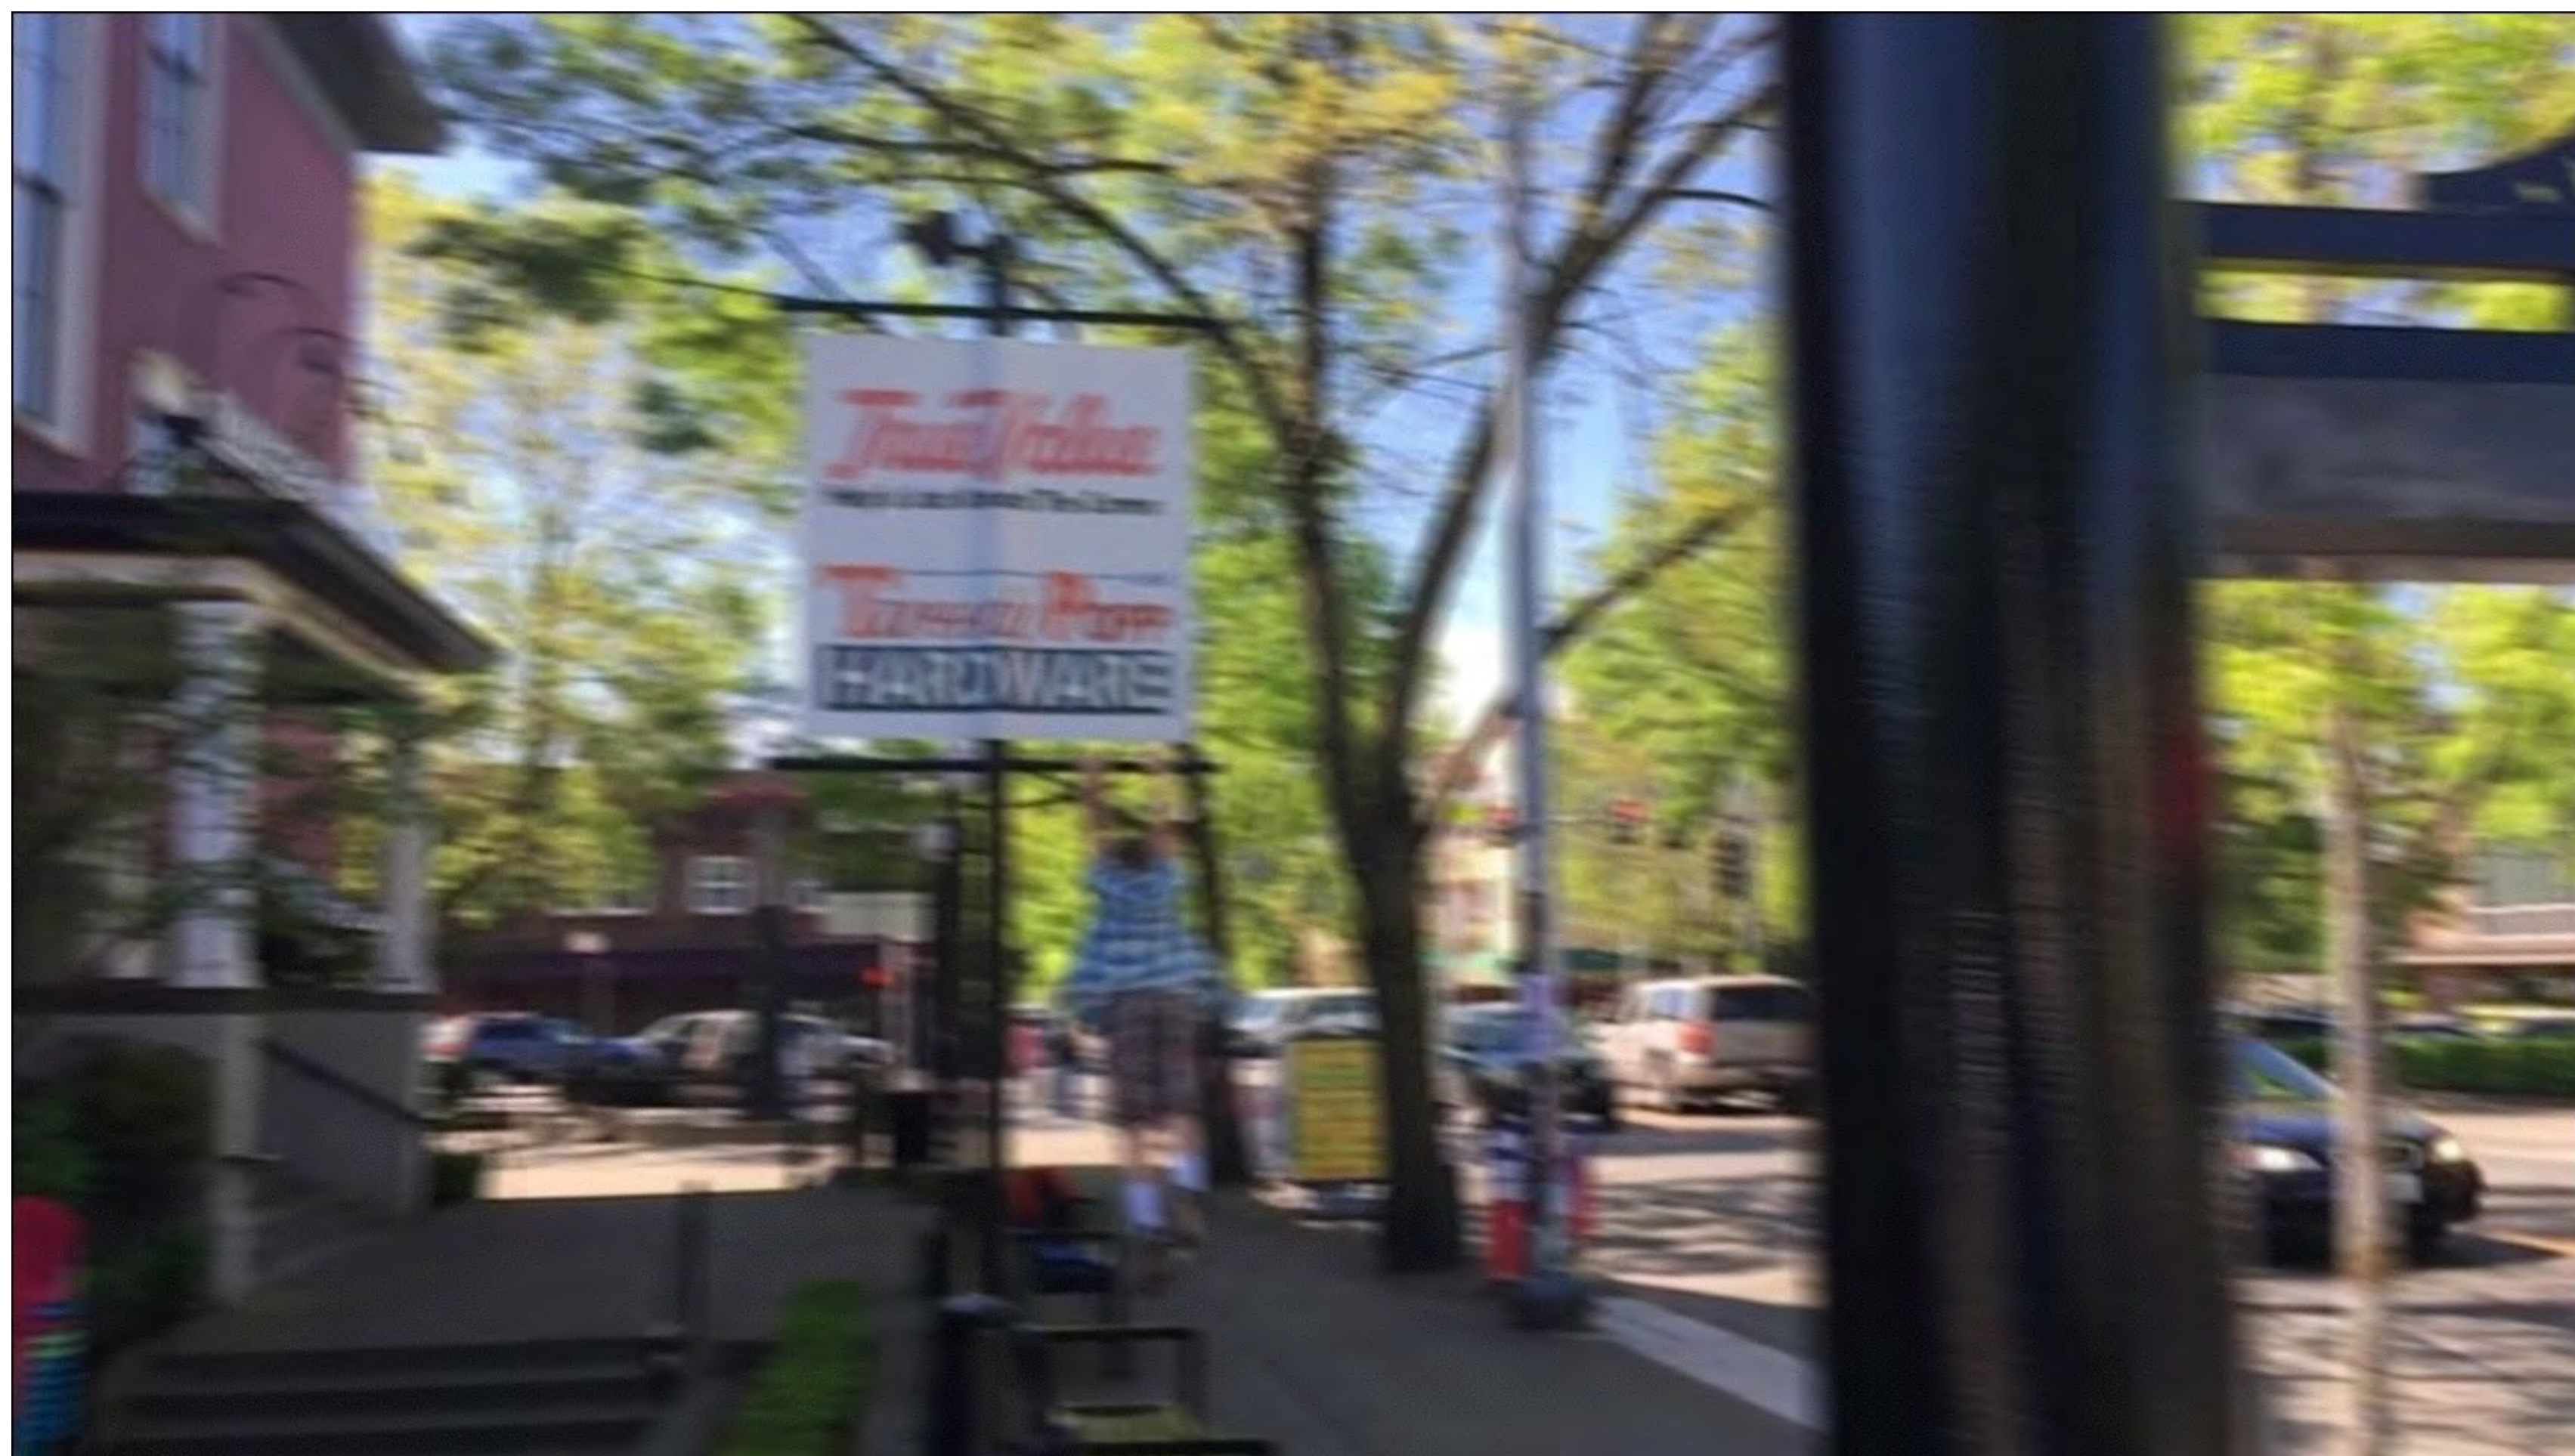

WFA [5]



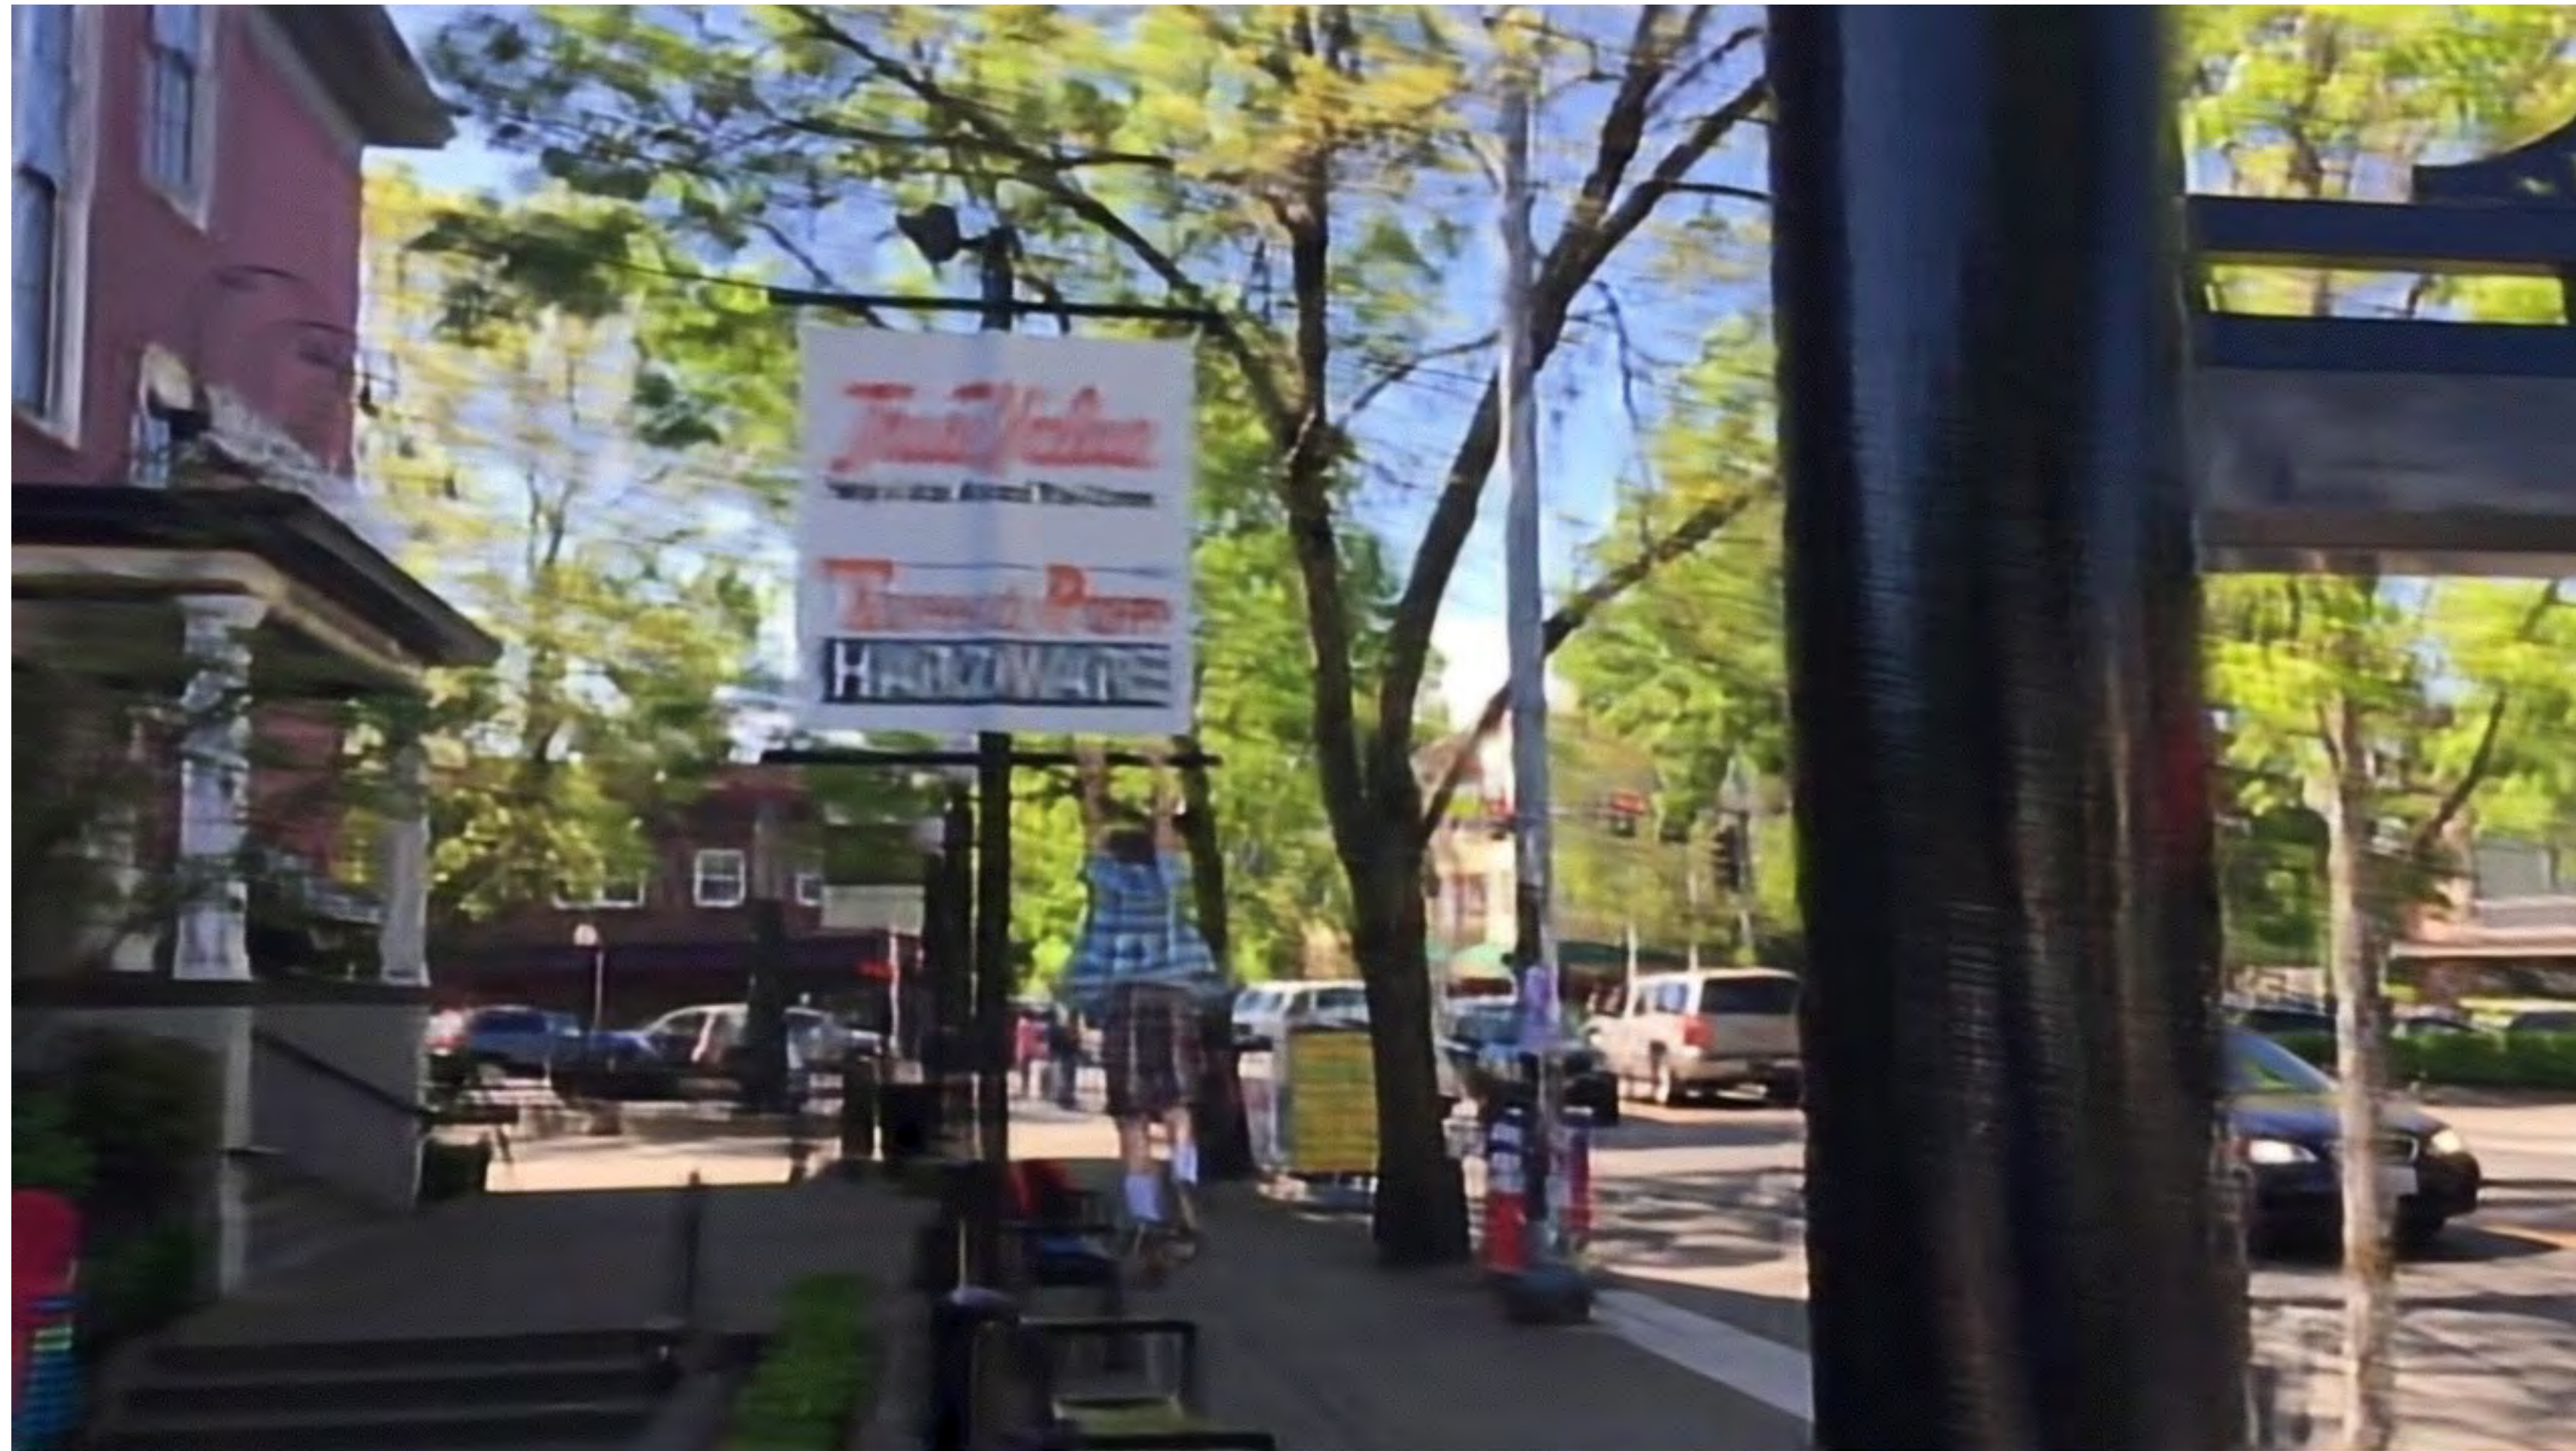

DBN+Single



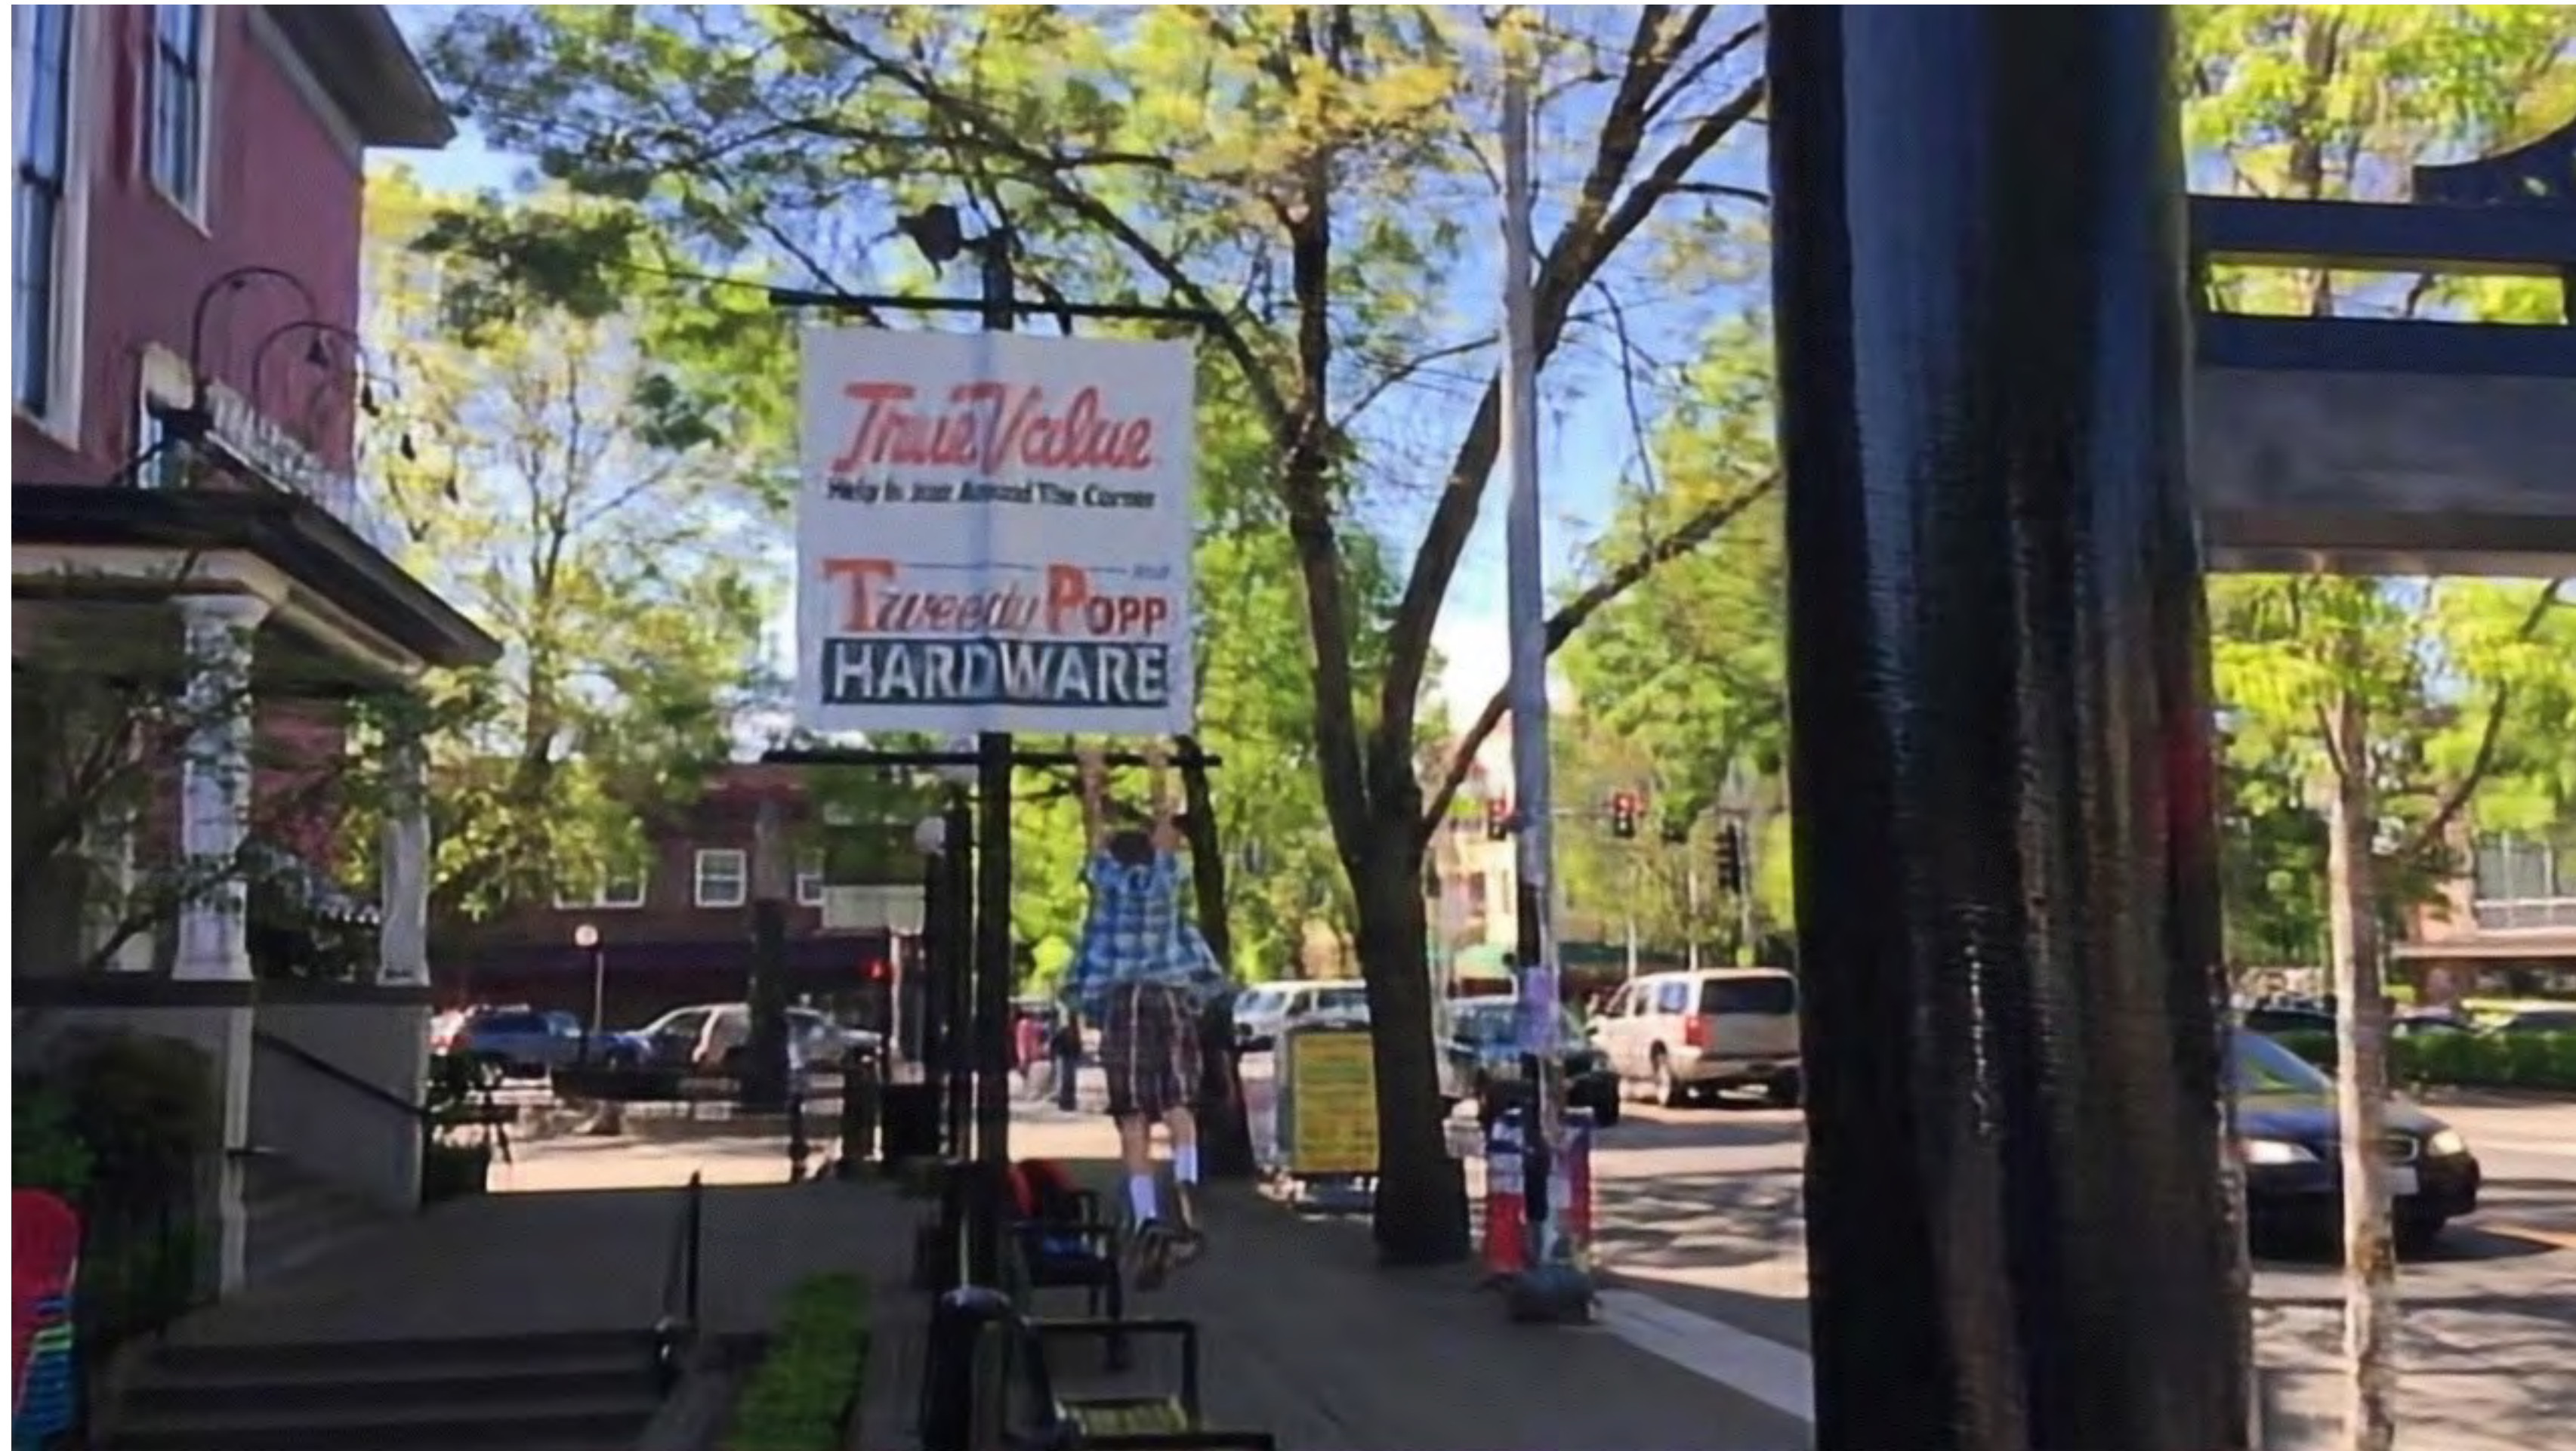

DBN+Noalign



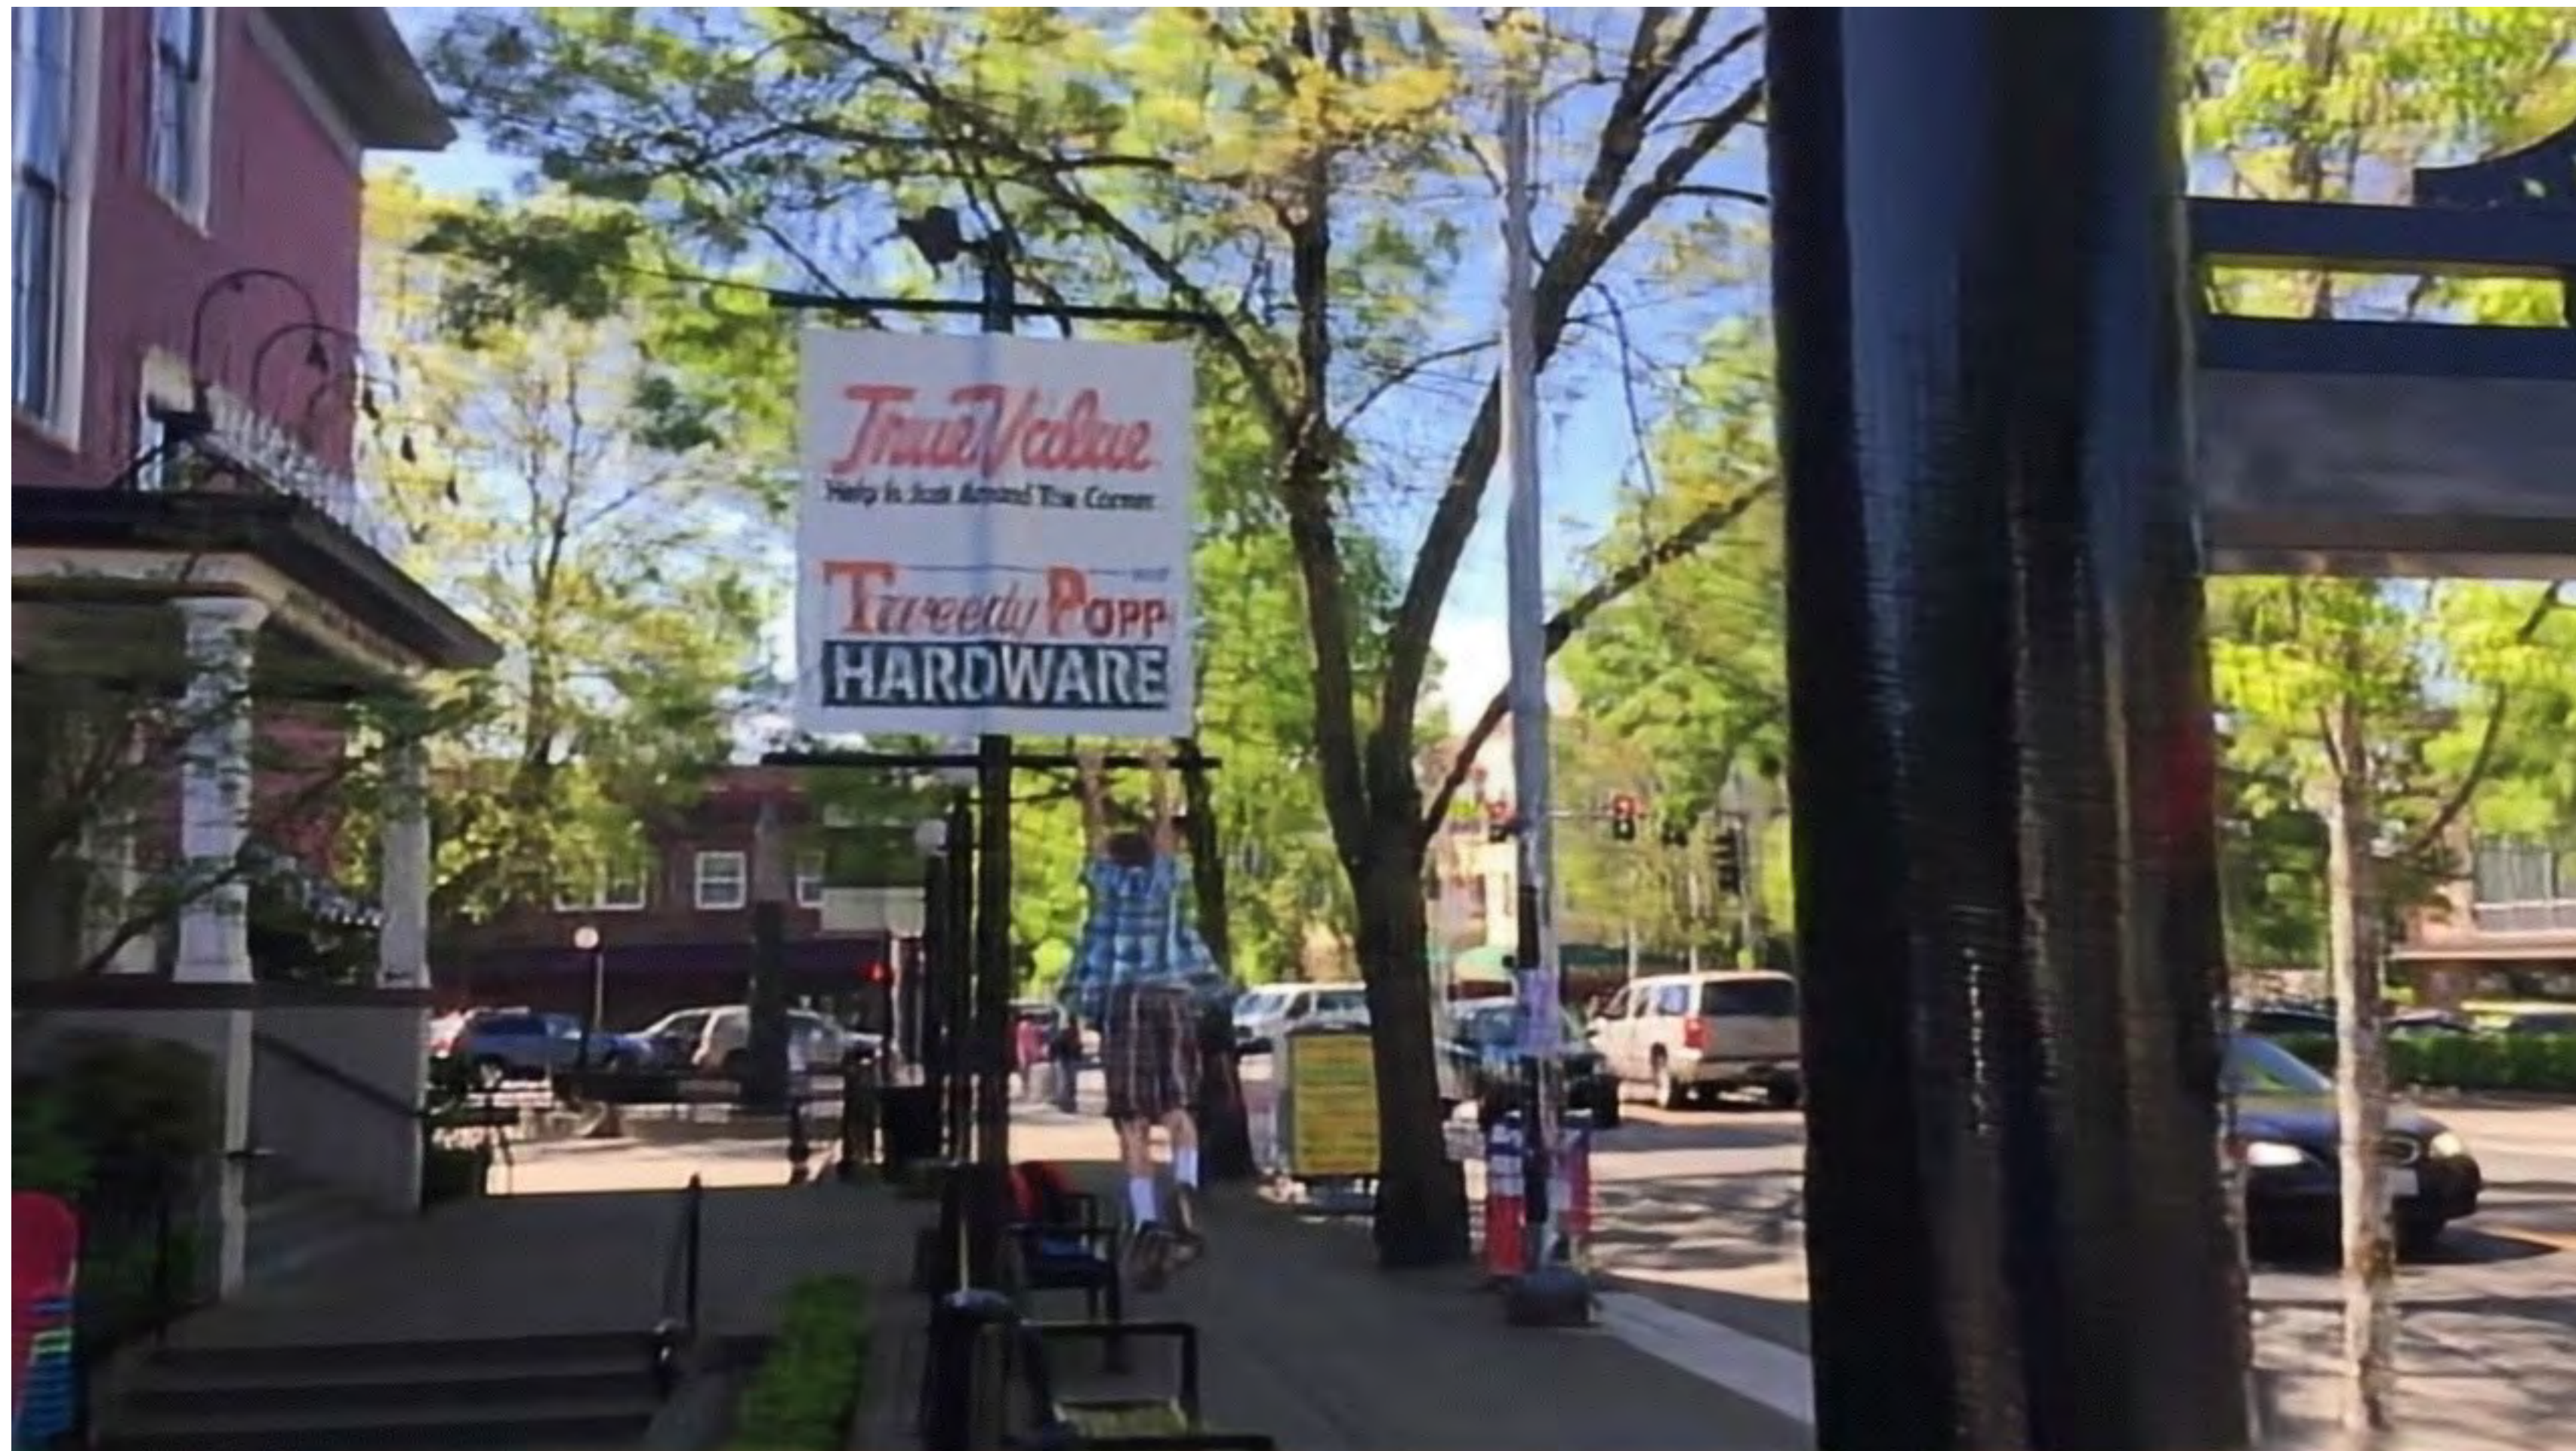

DBN+Homog



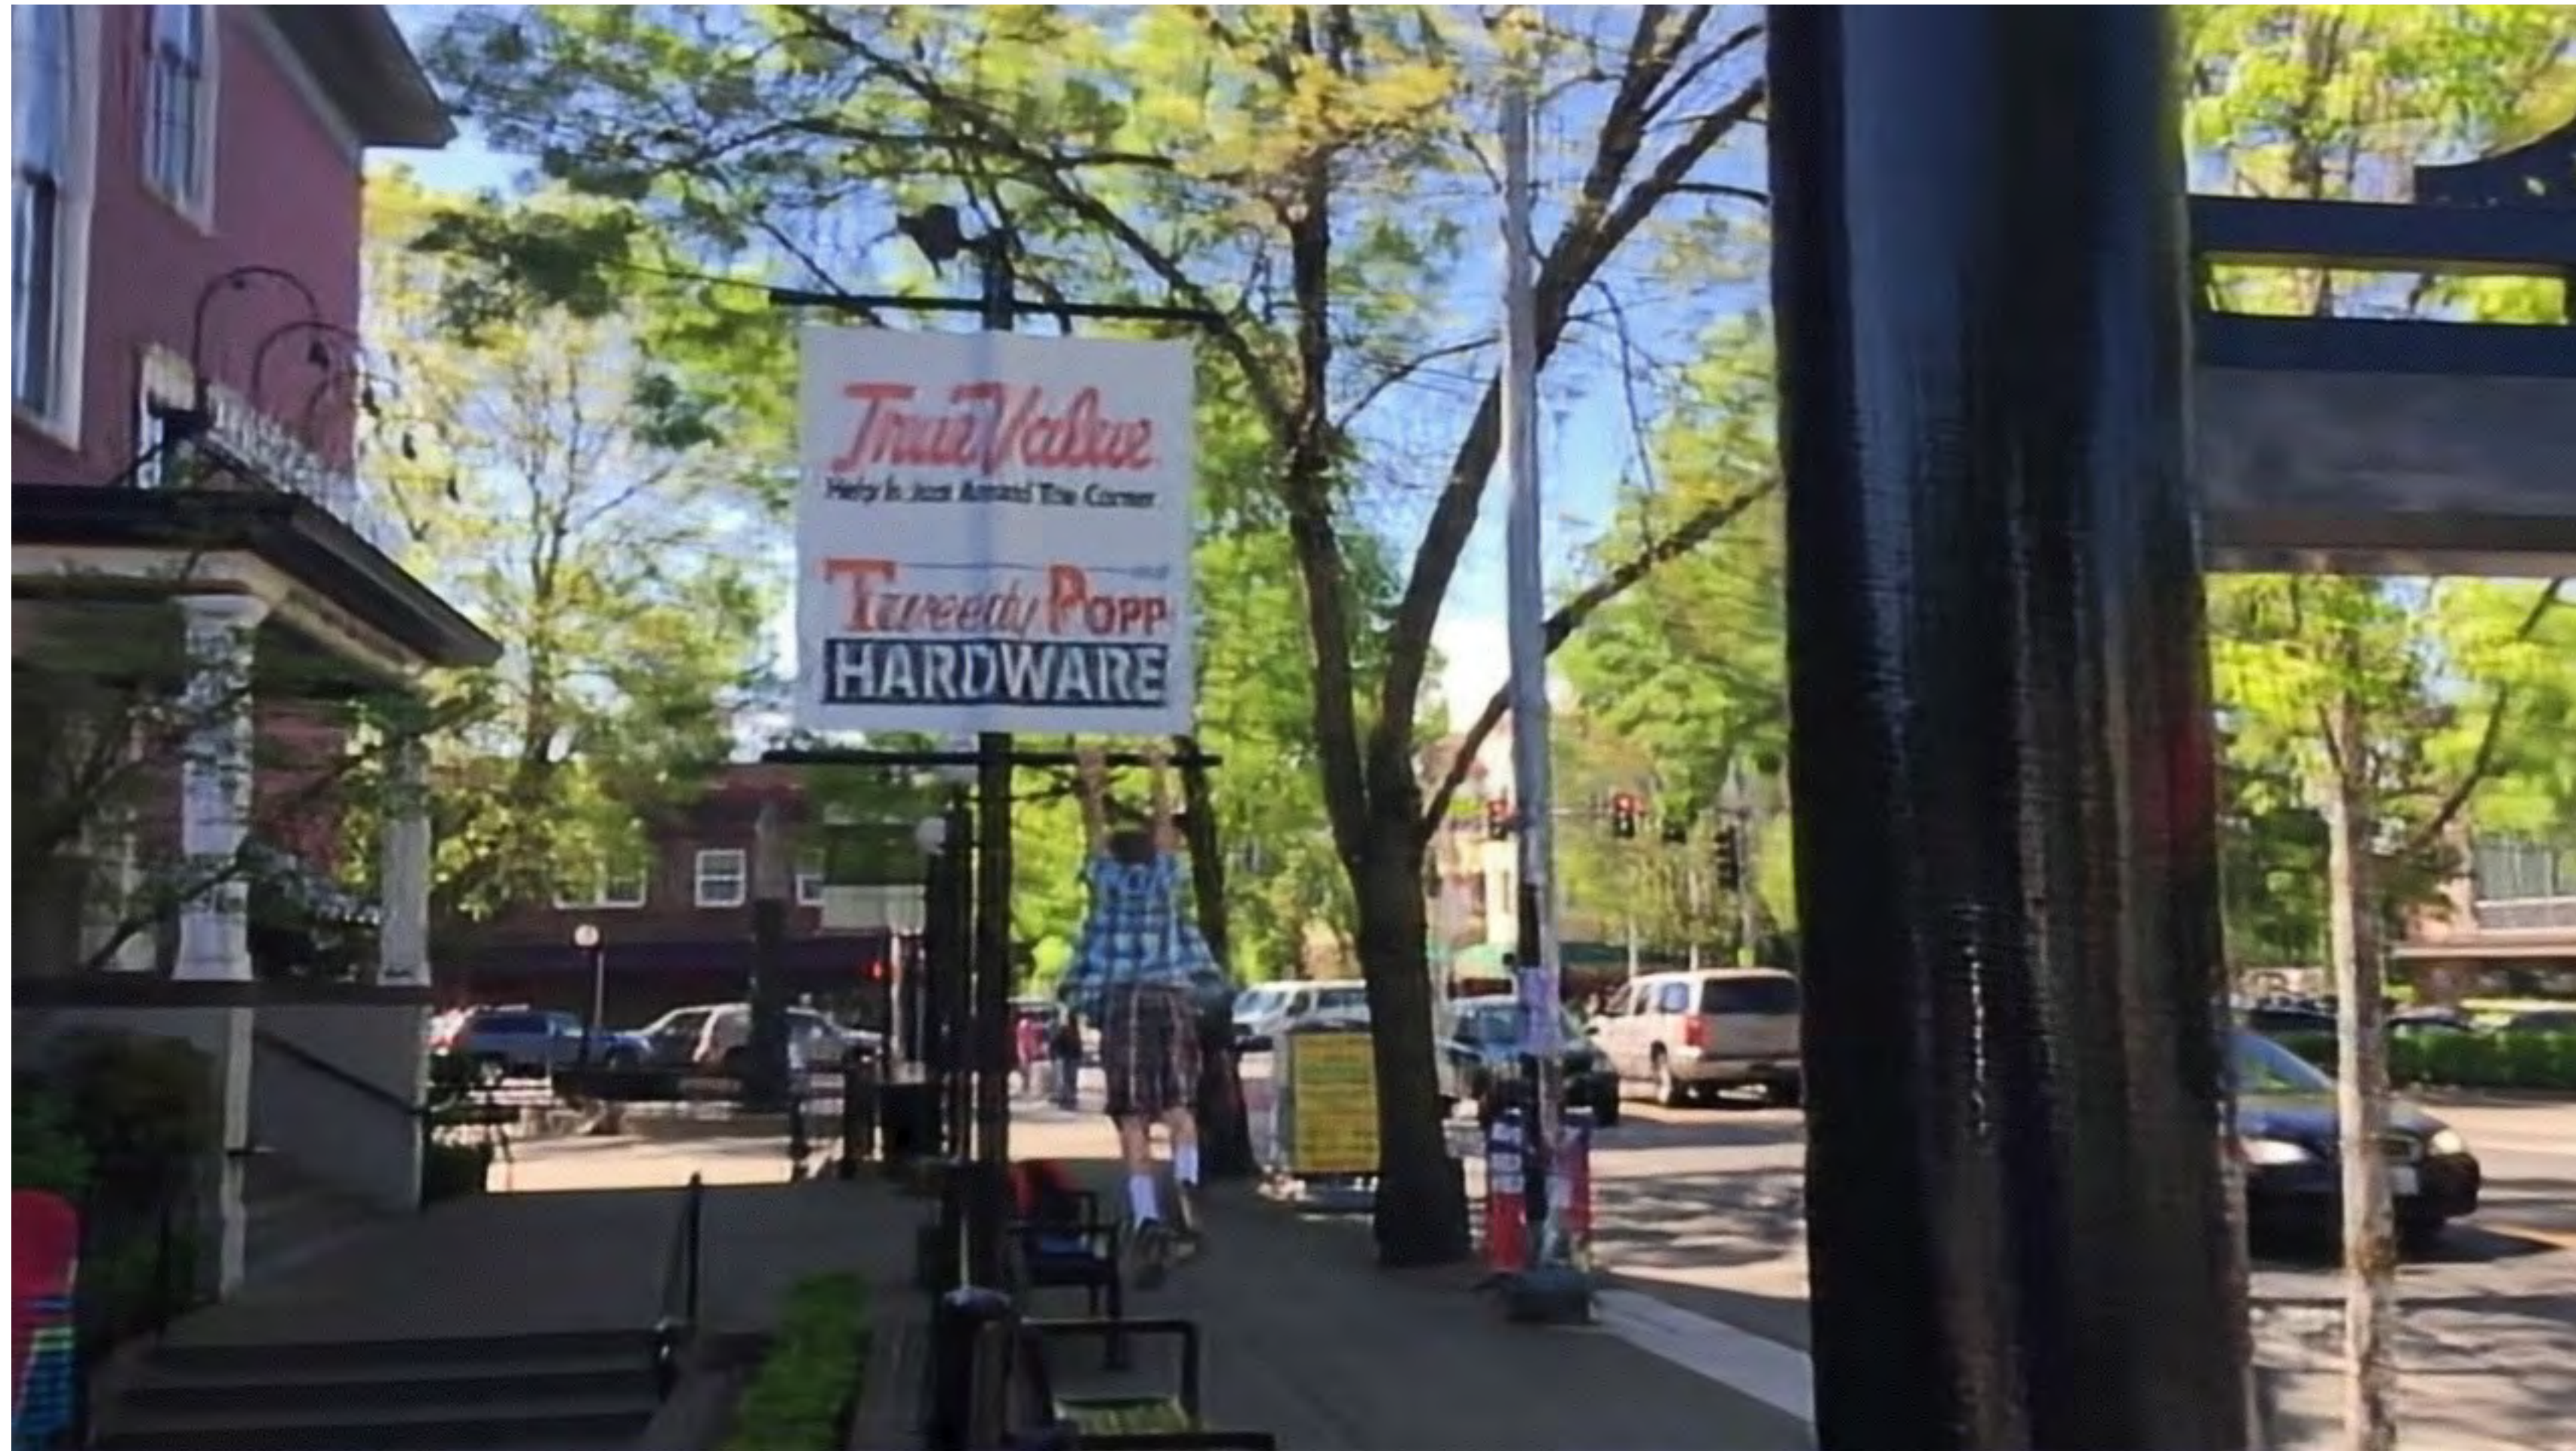

DBN+Flow



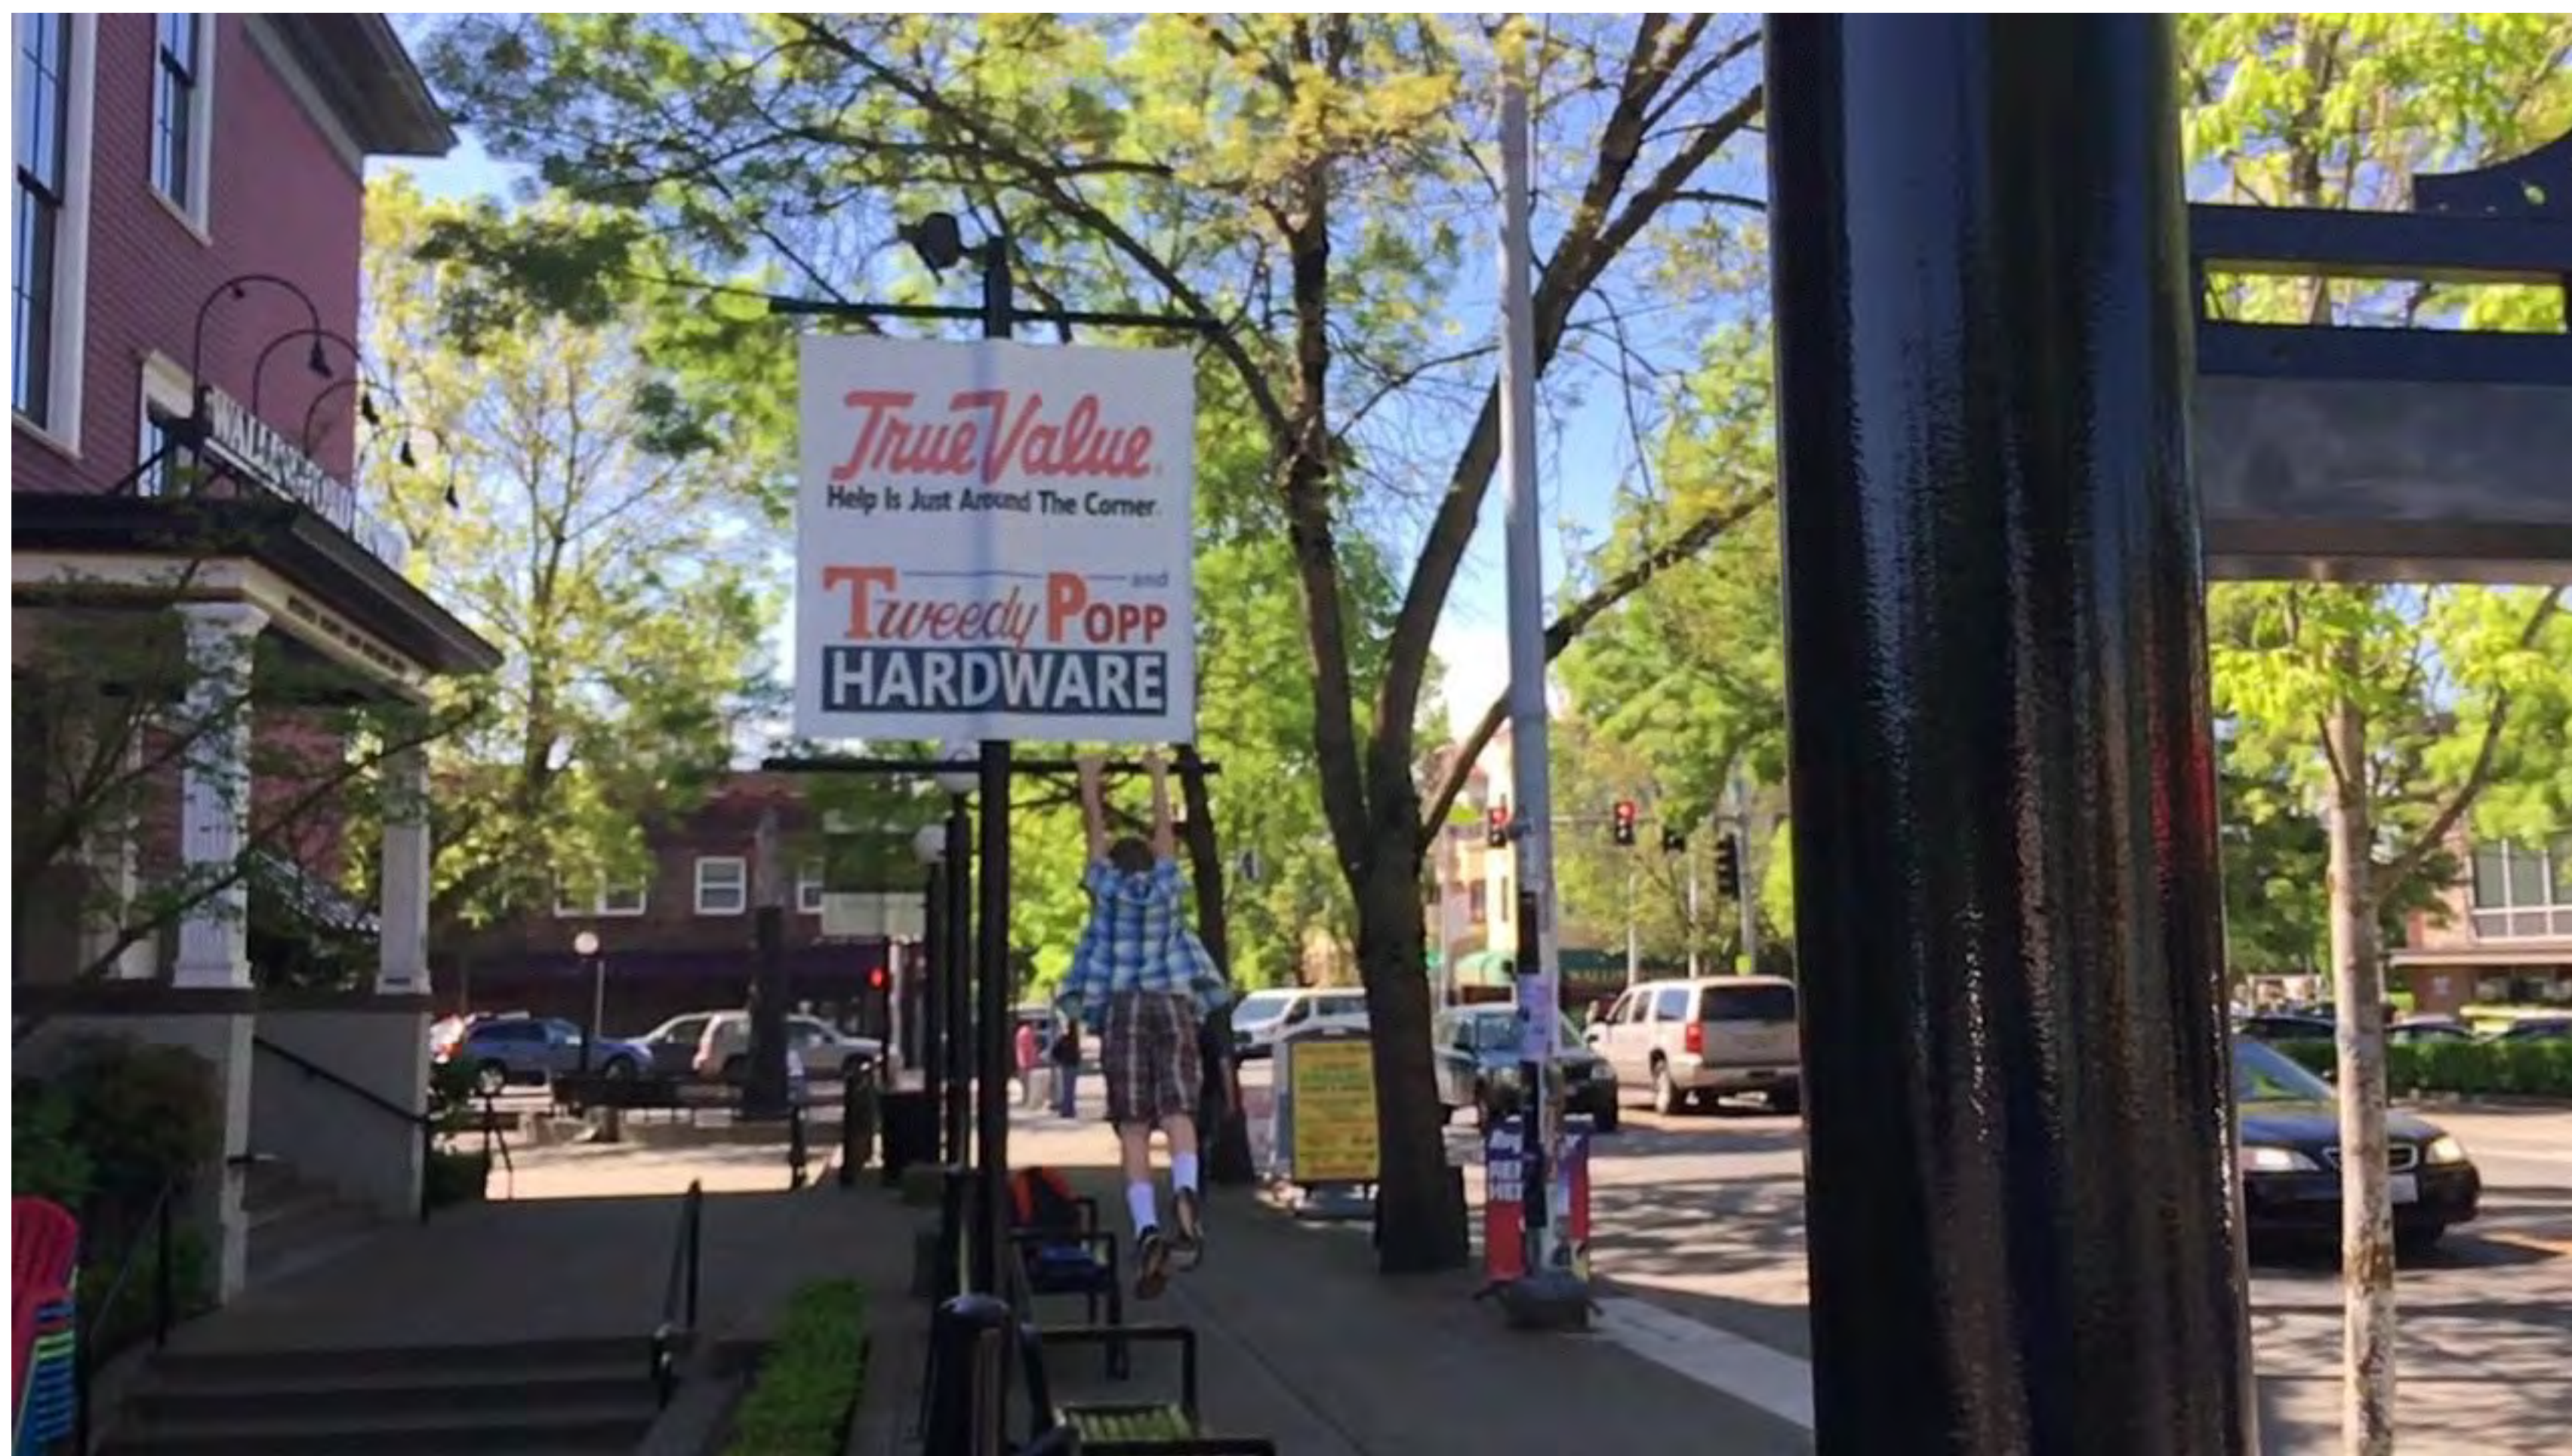

ground-truth



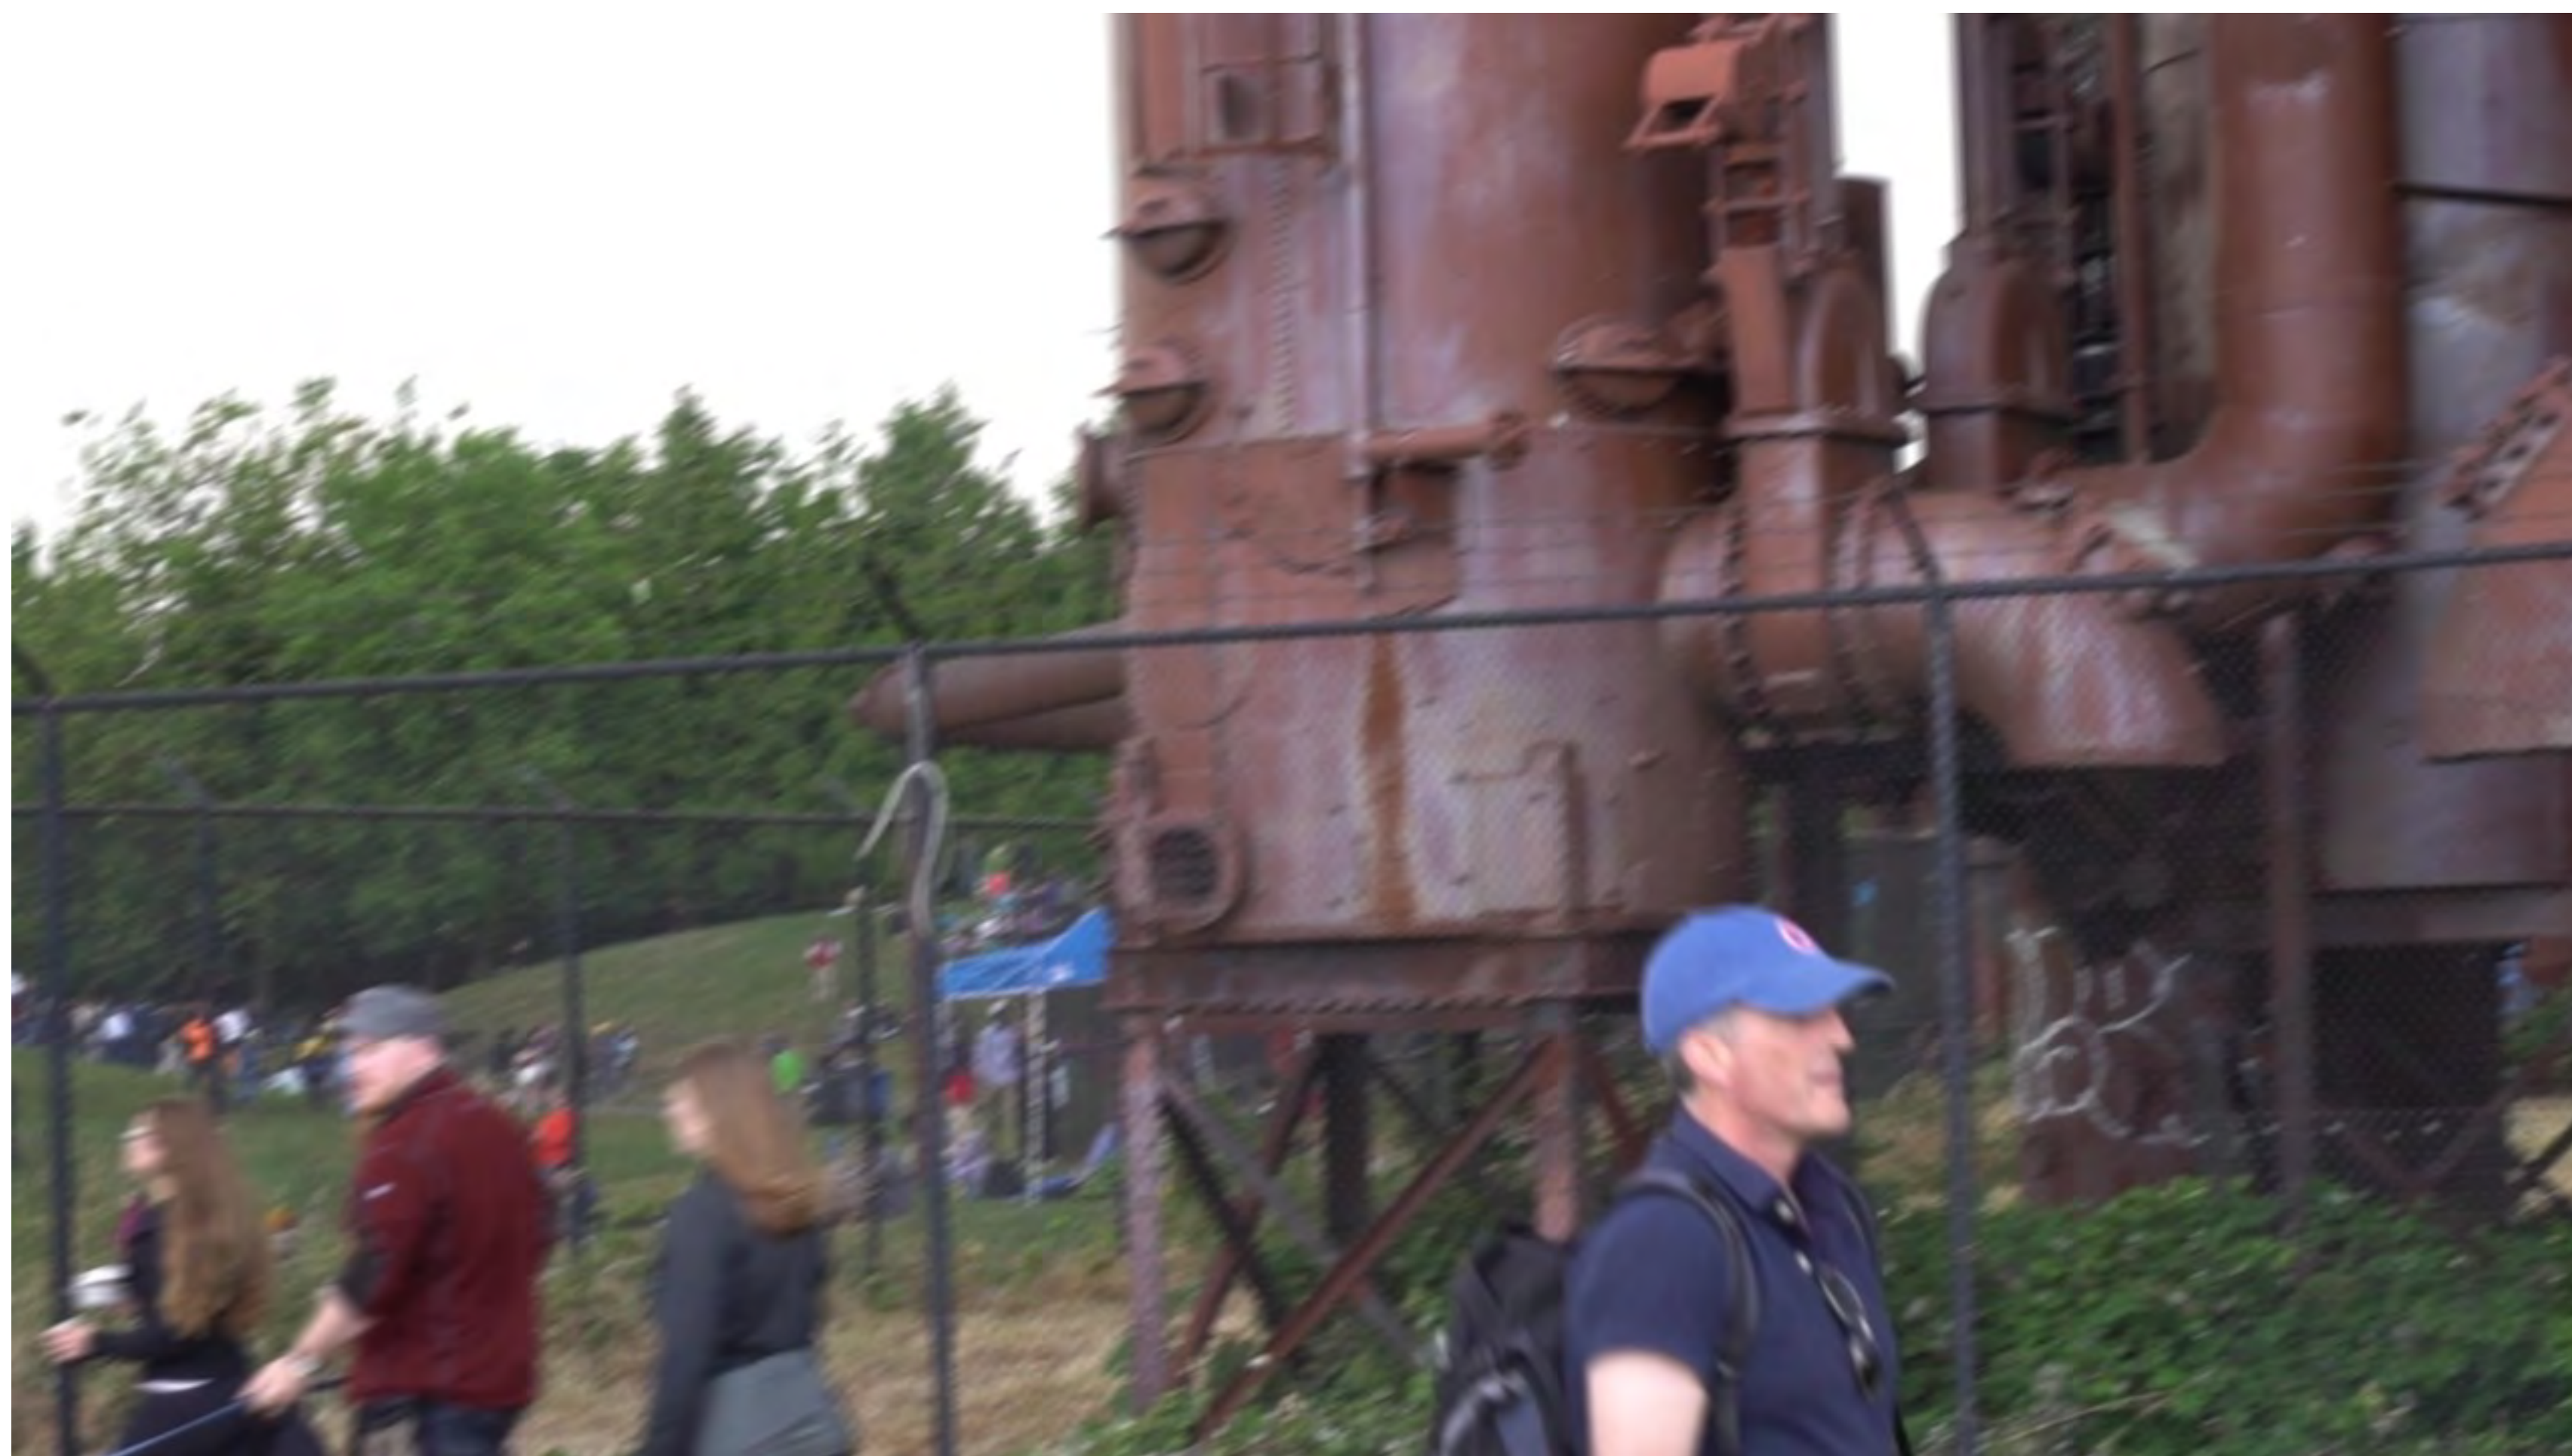

input



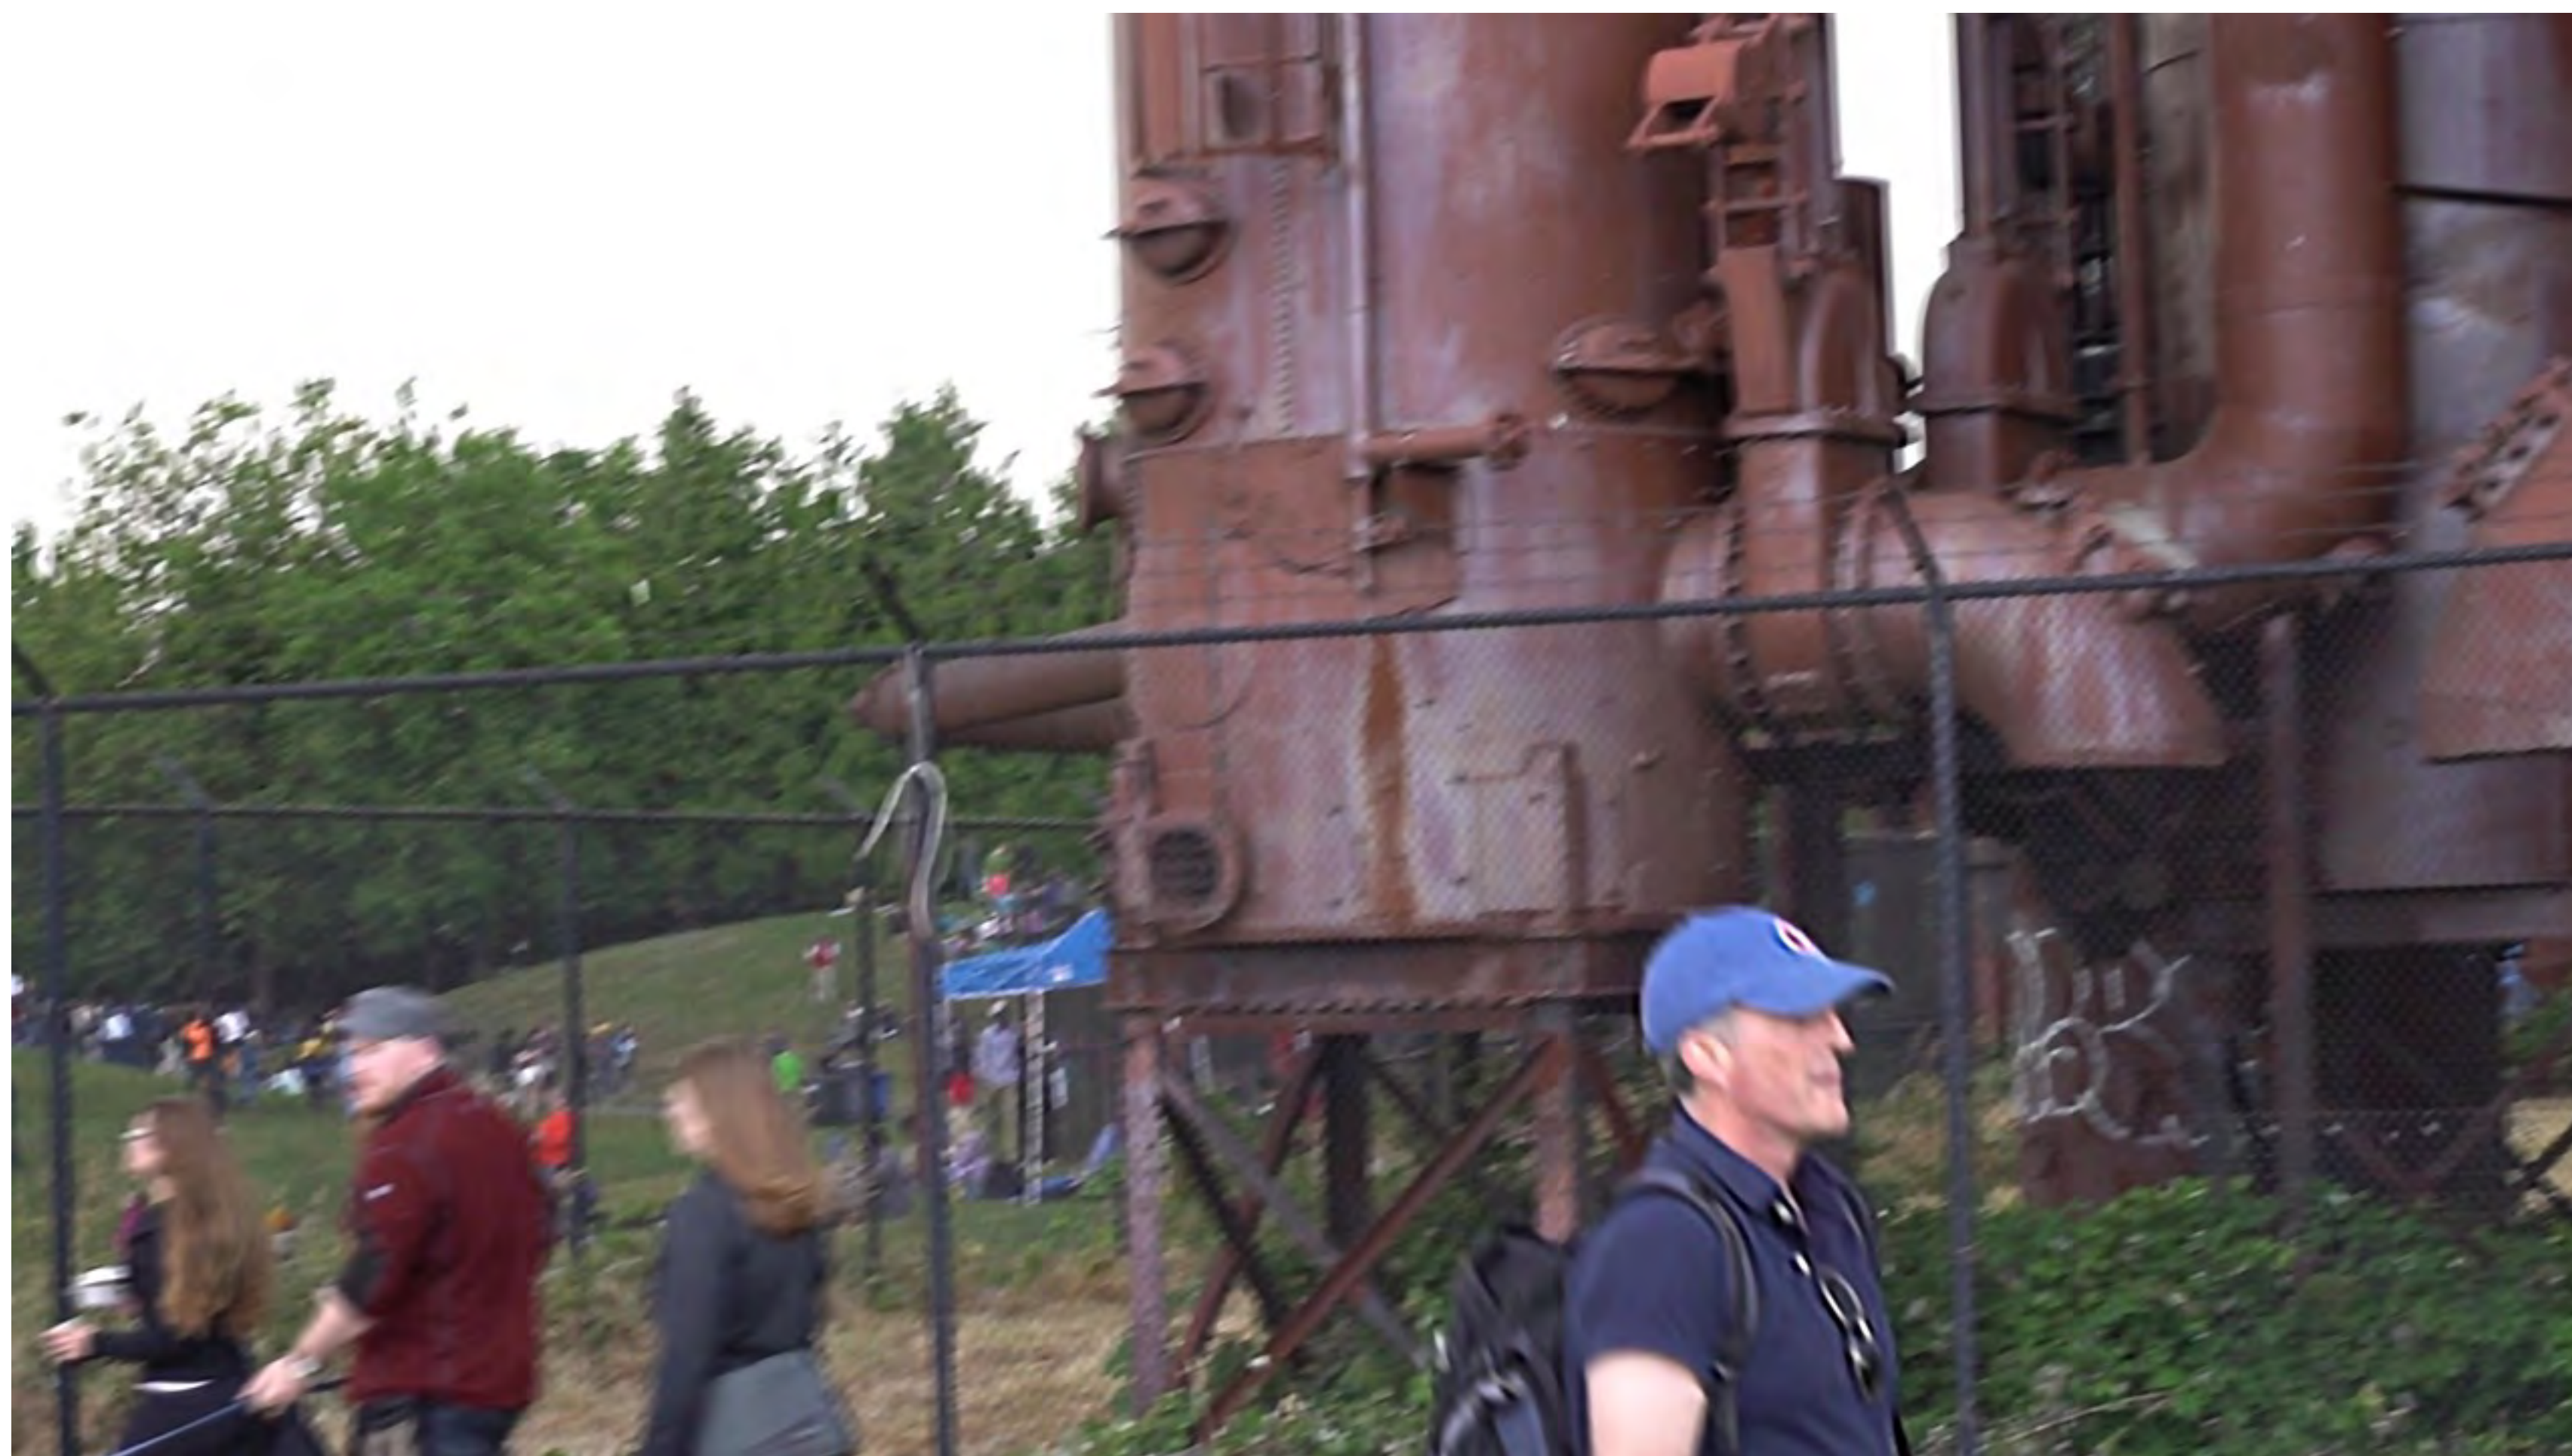

PSDeblur



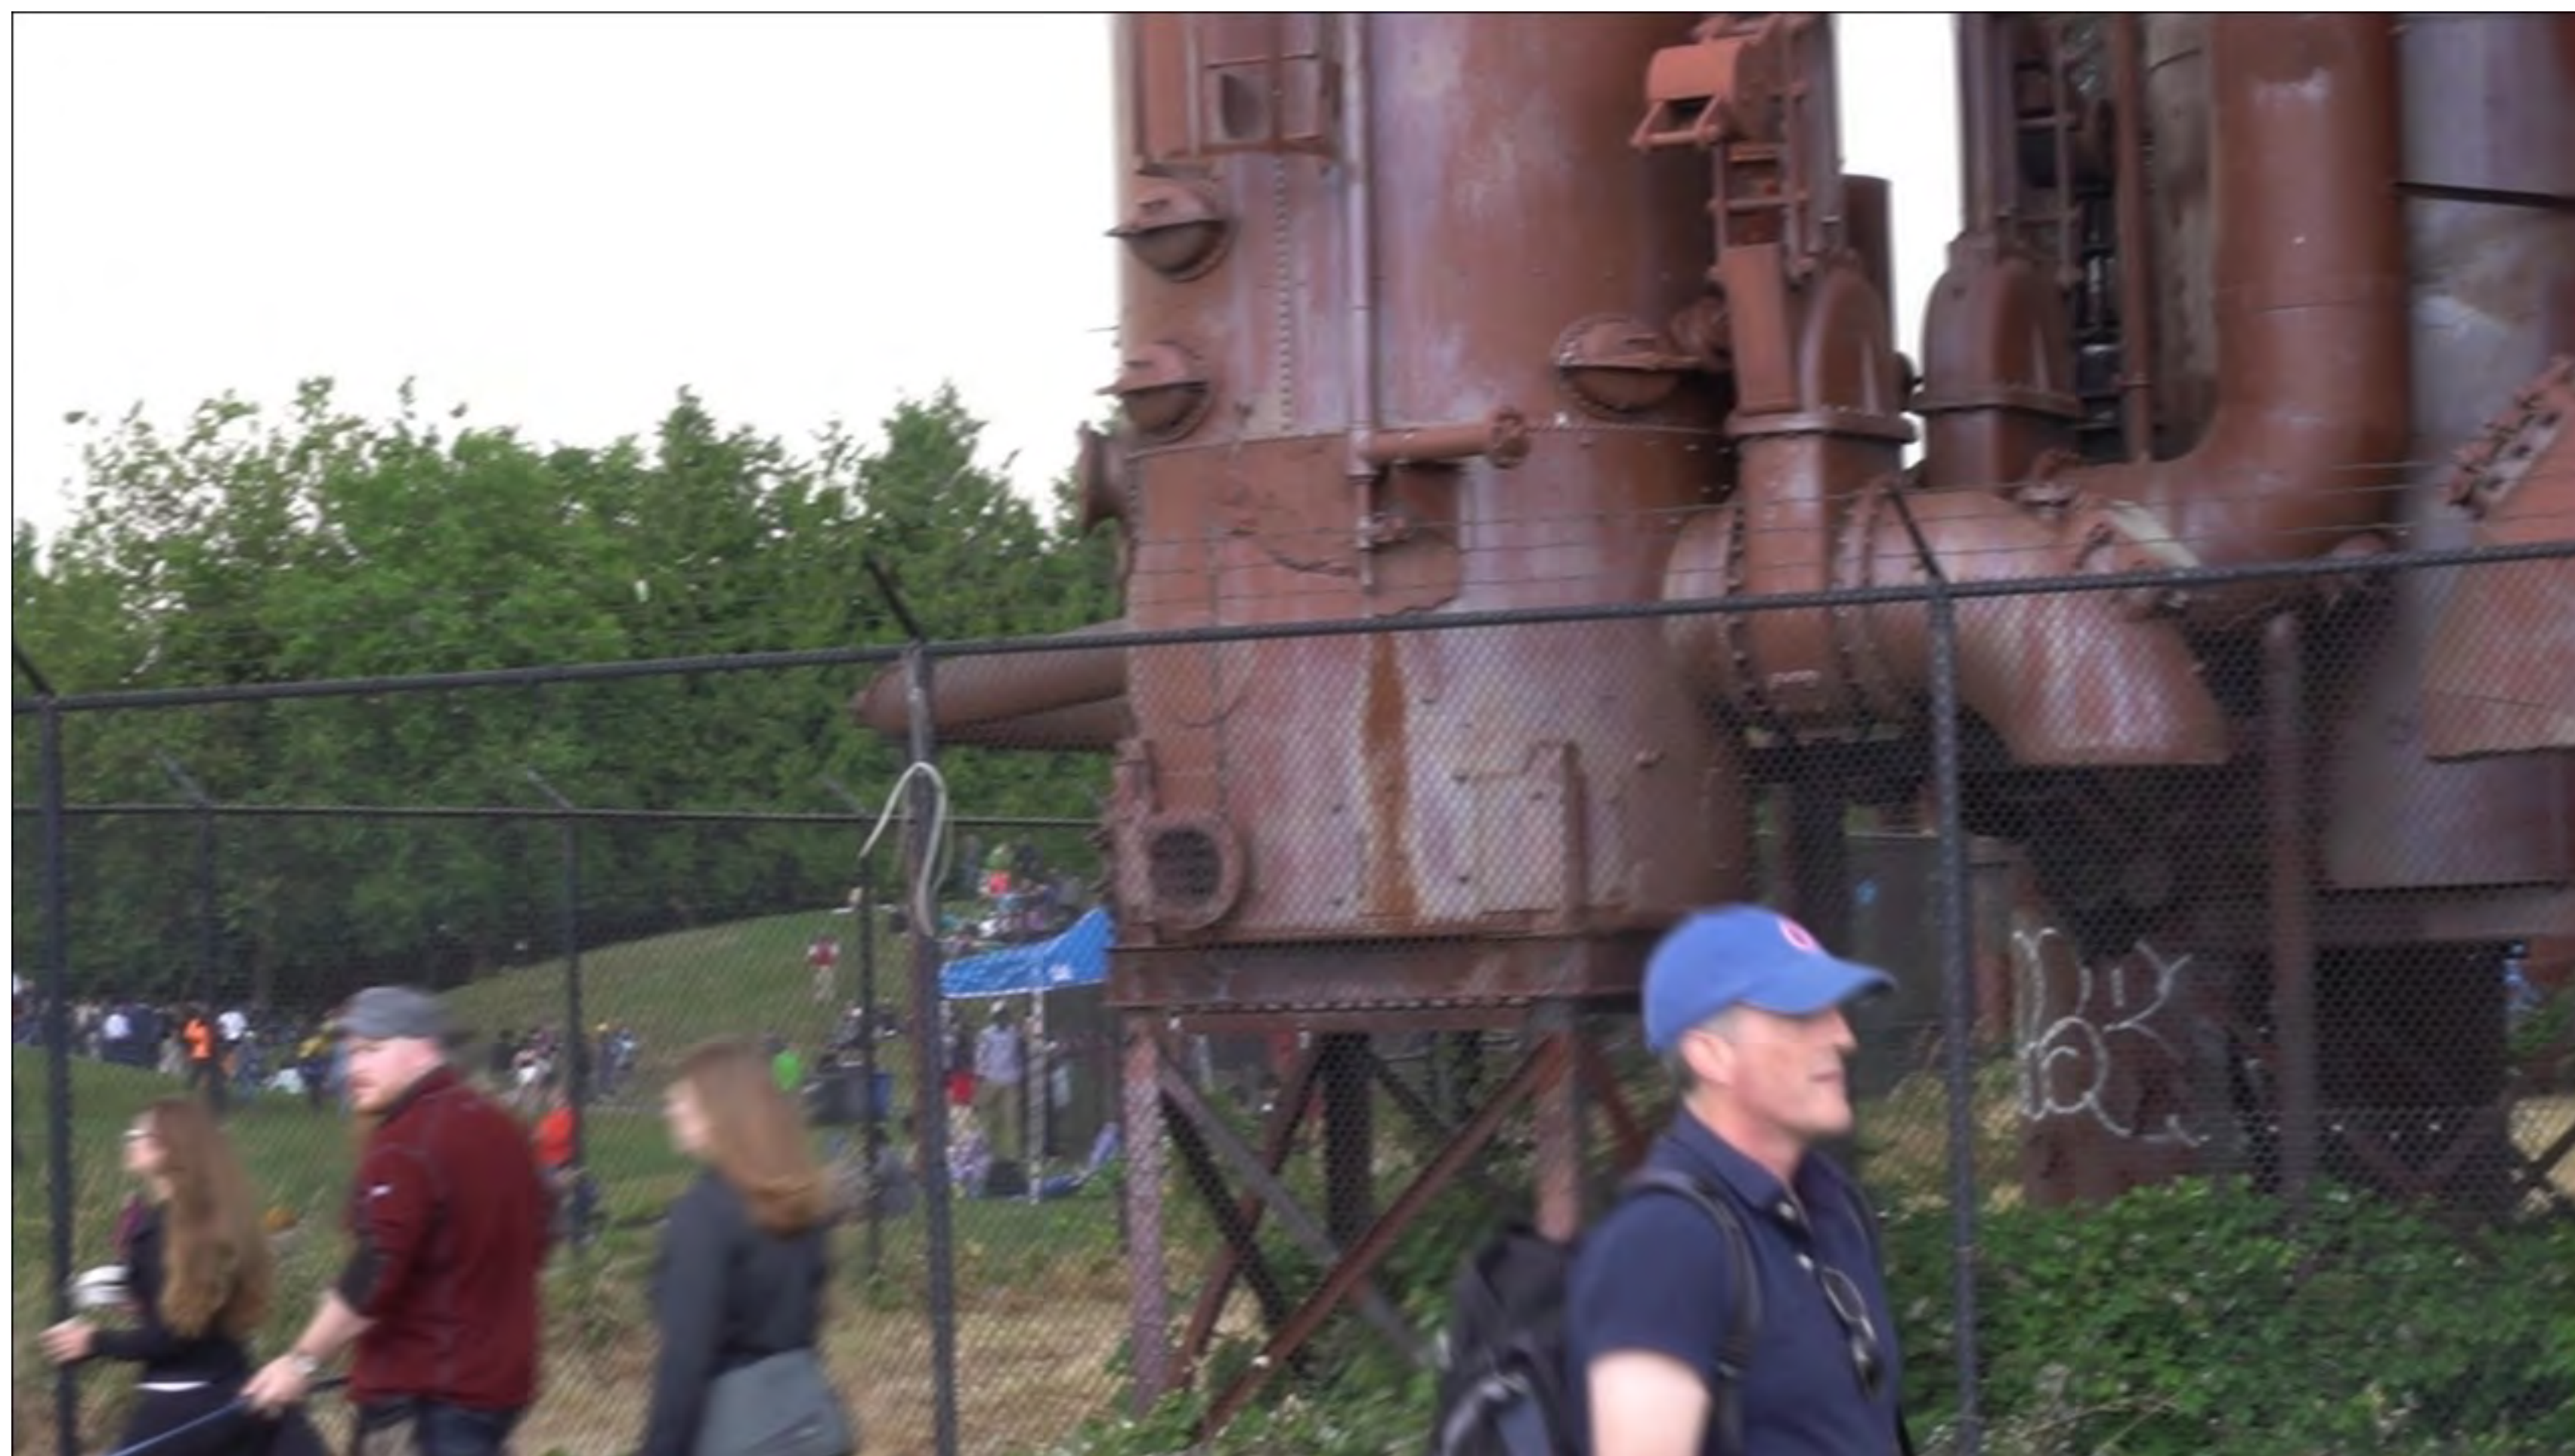

WFA [5]



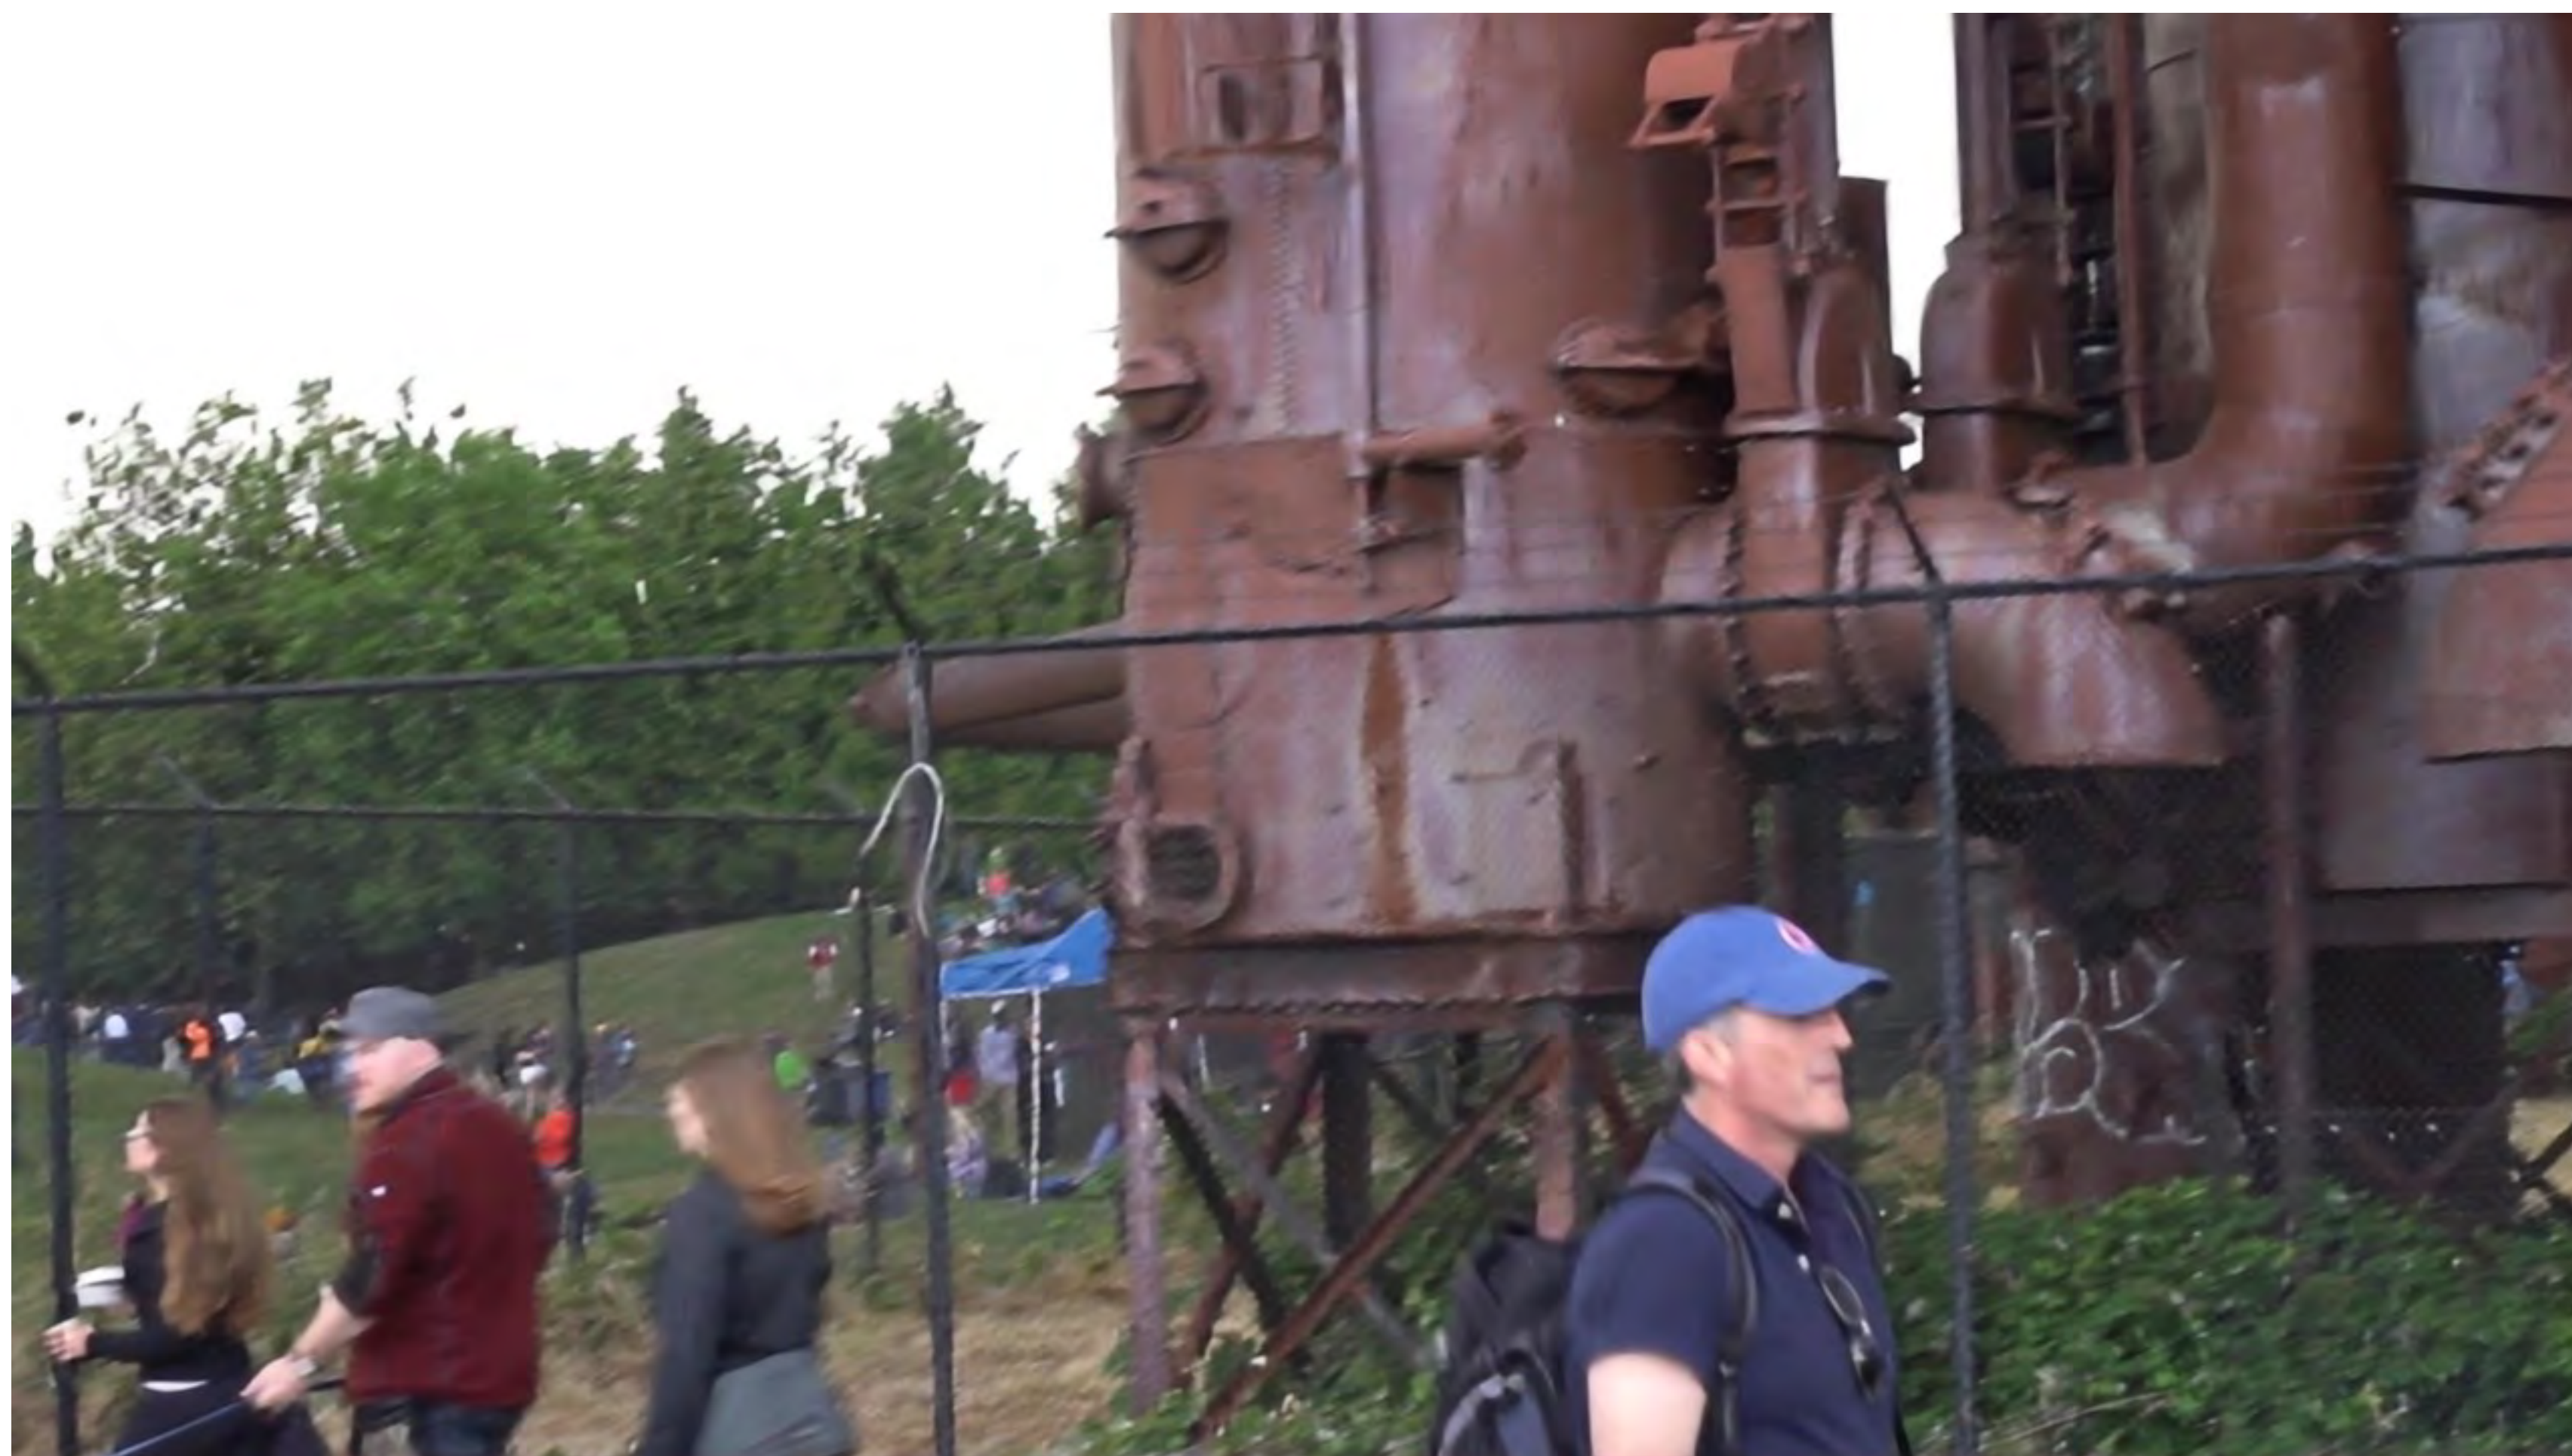

DBN+Single



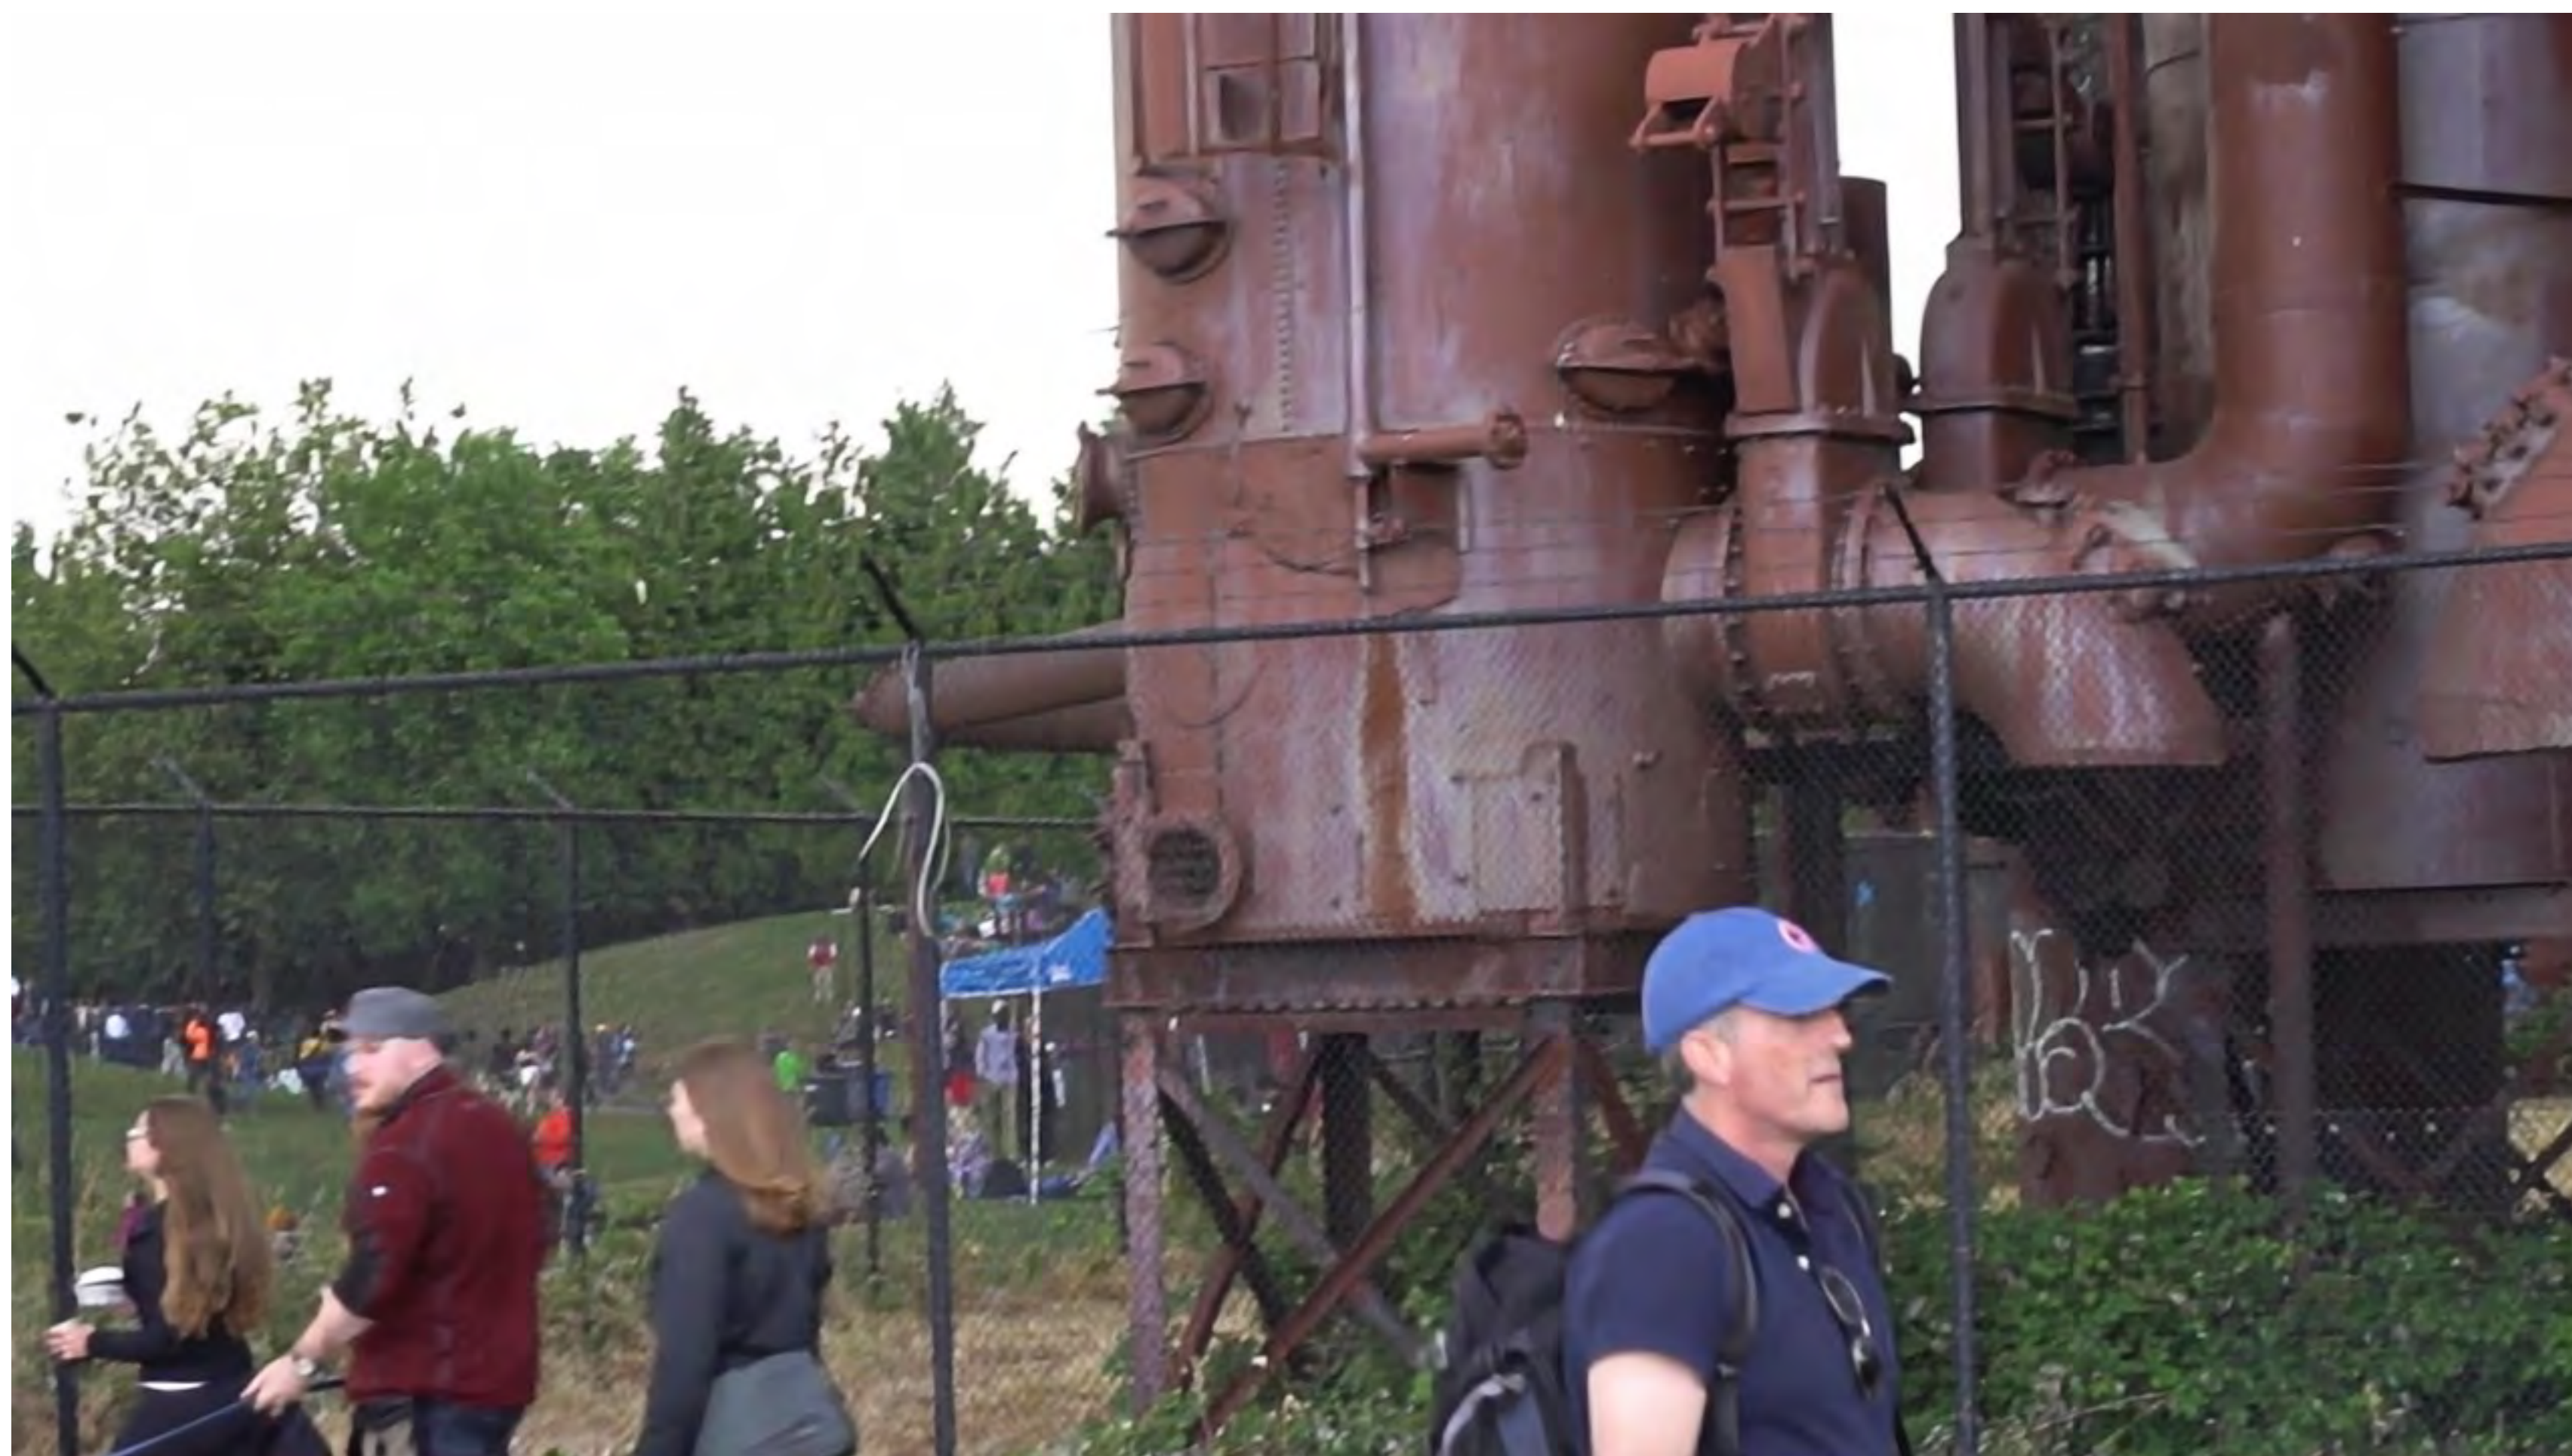

DBN+Noalign



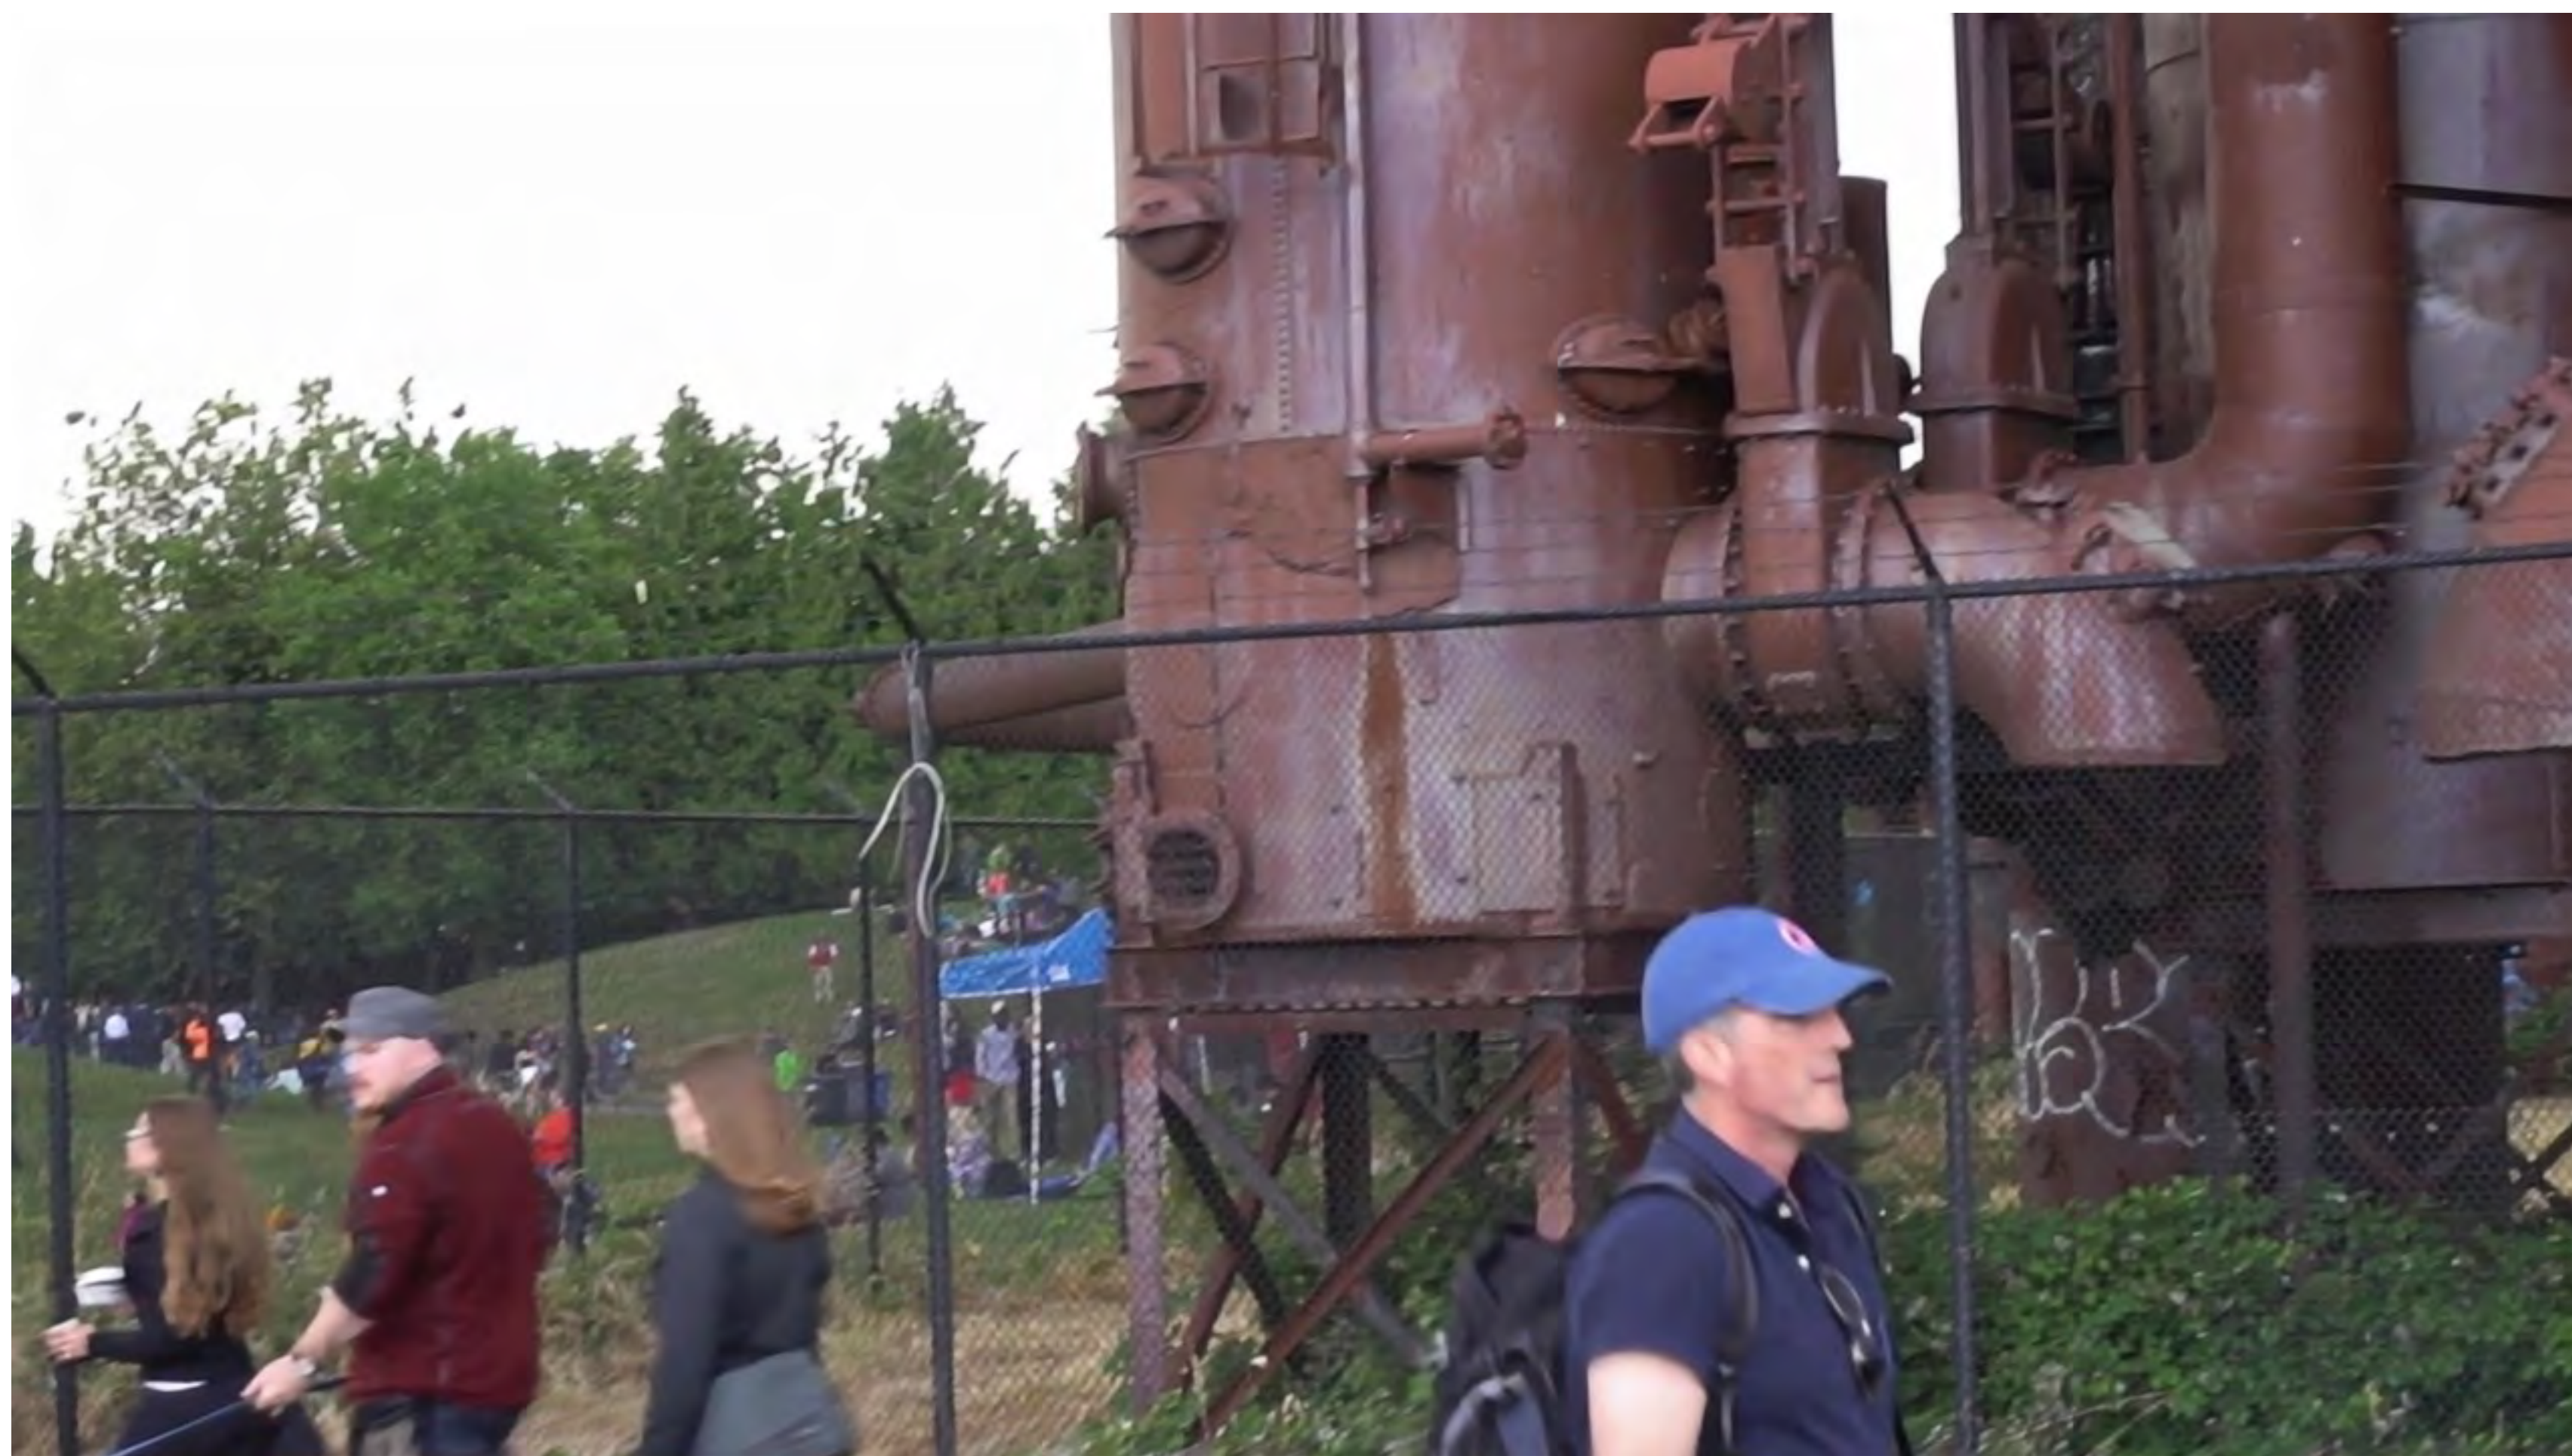

DBN+Homog



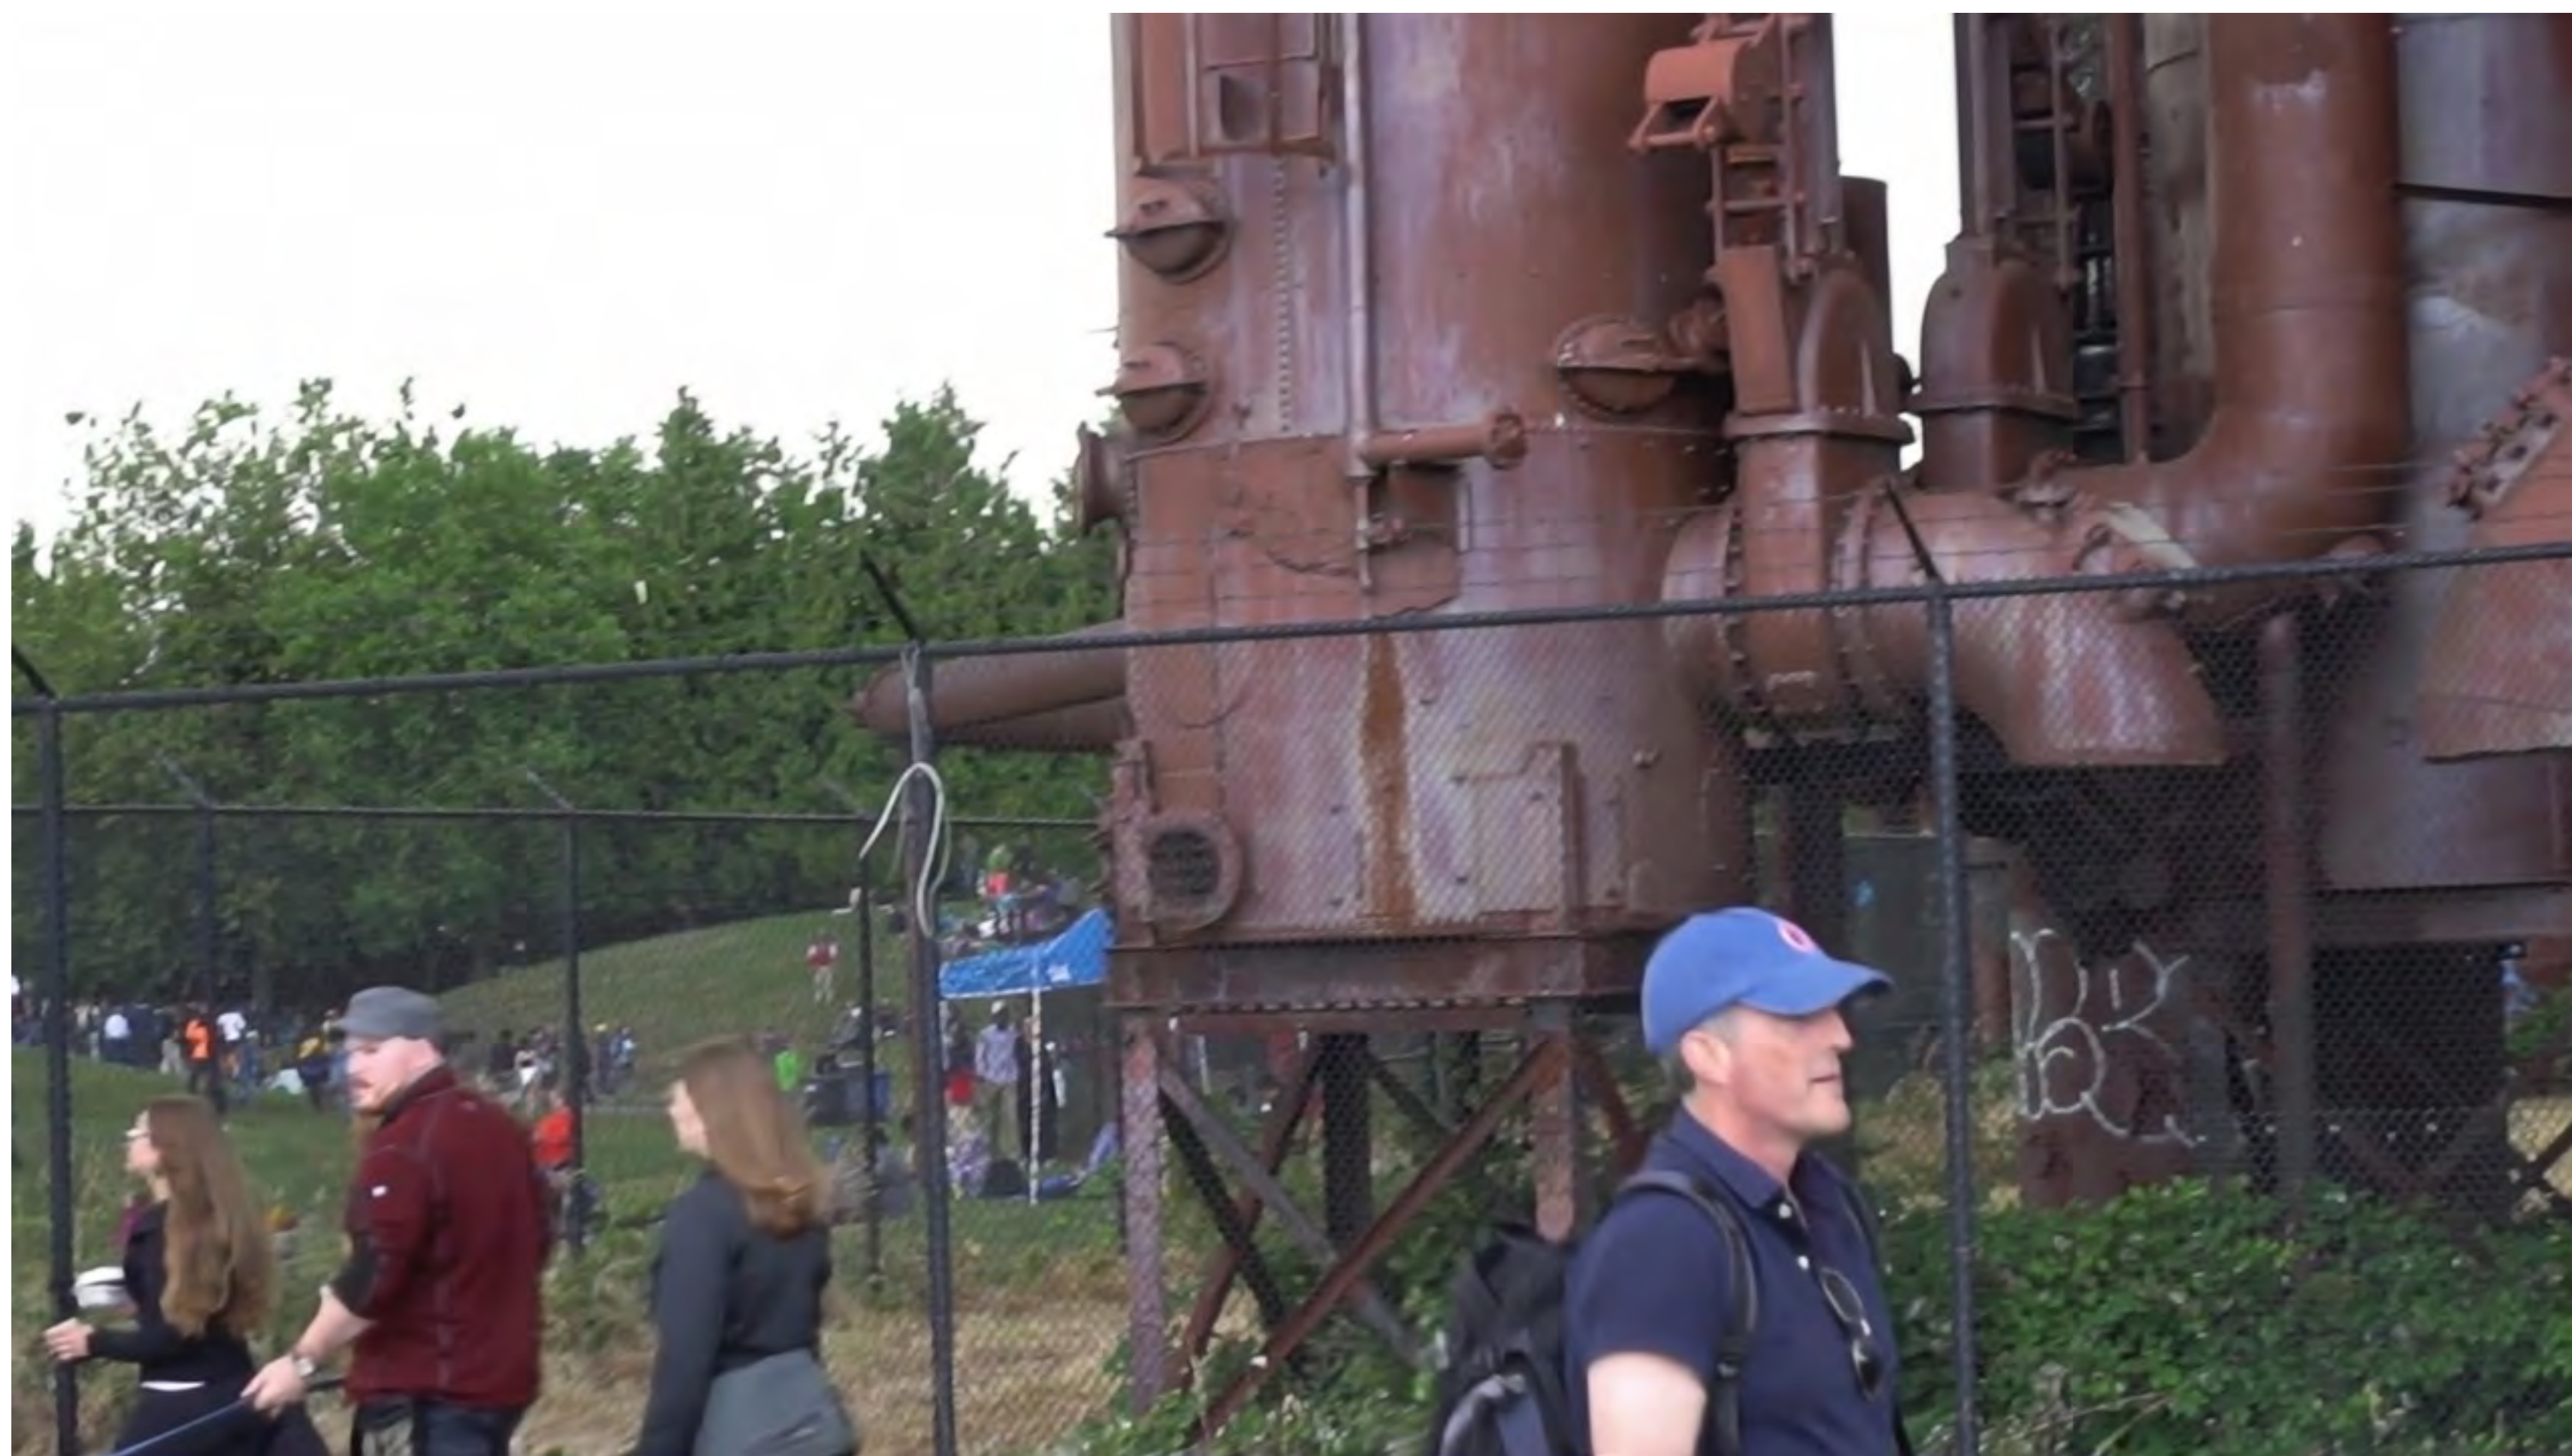

DBN+Flow



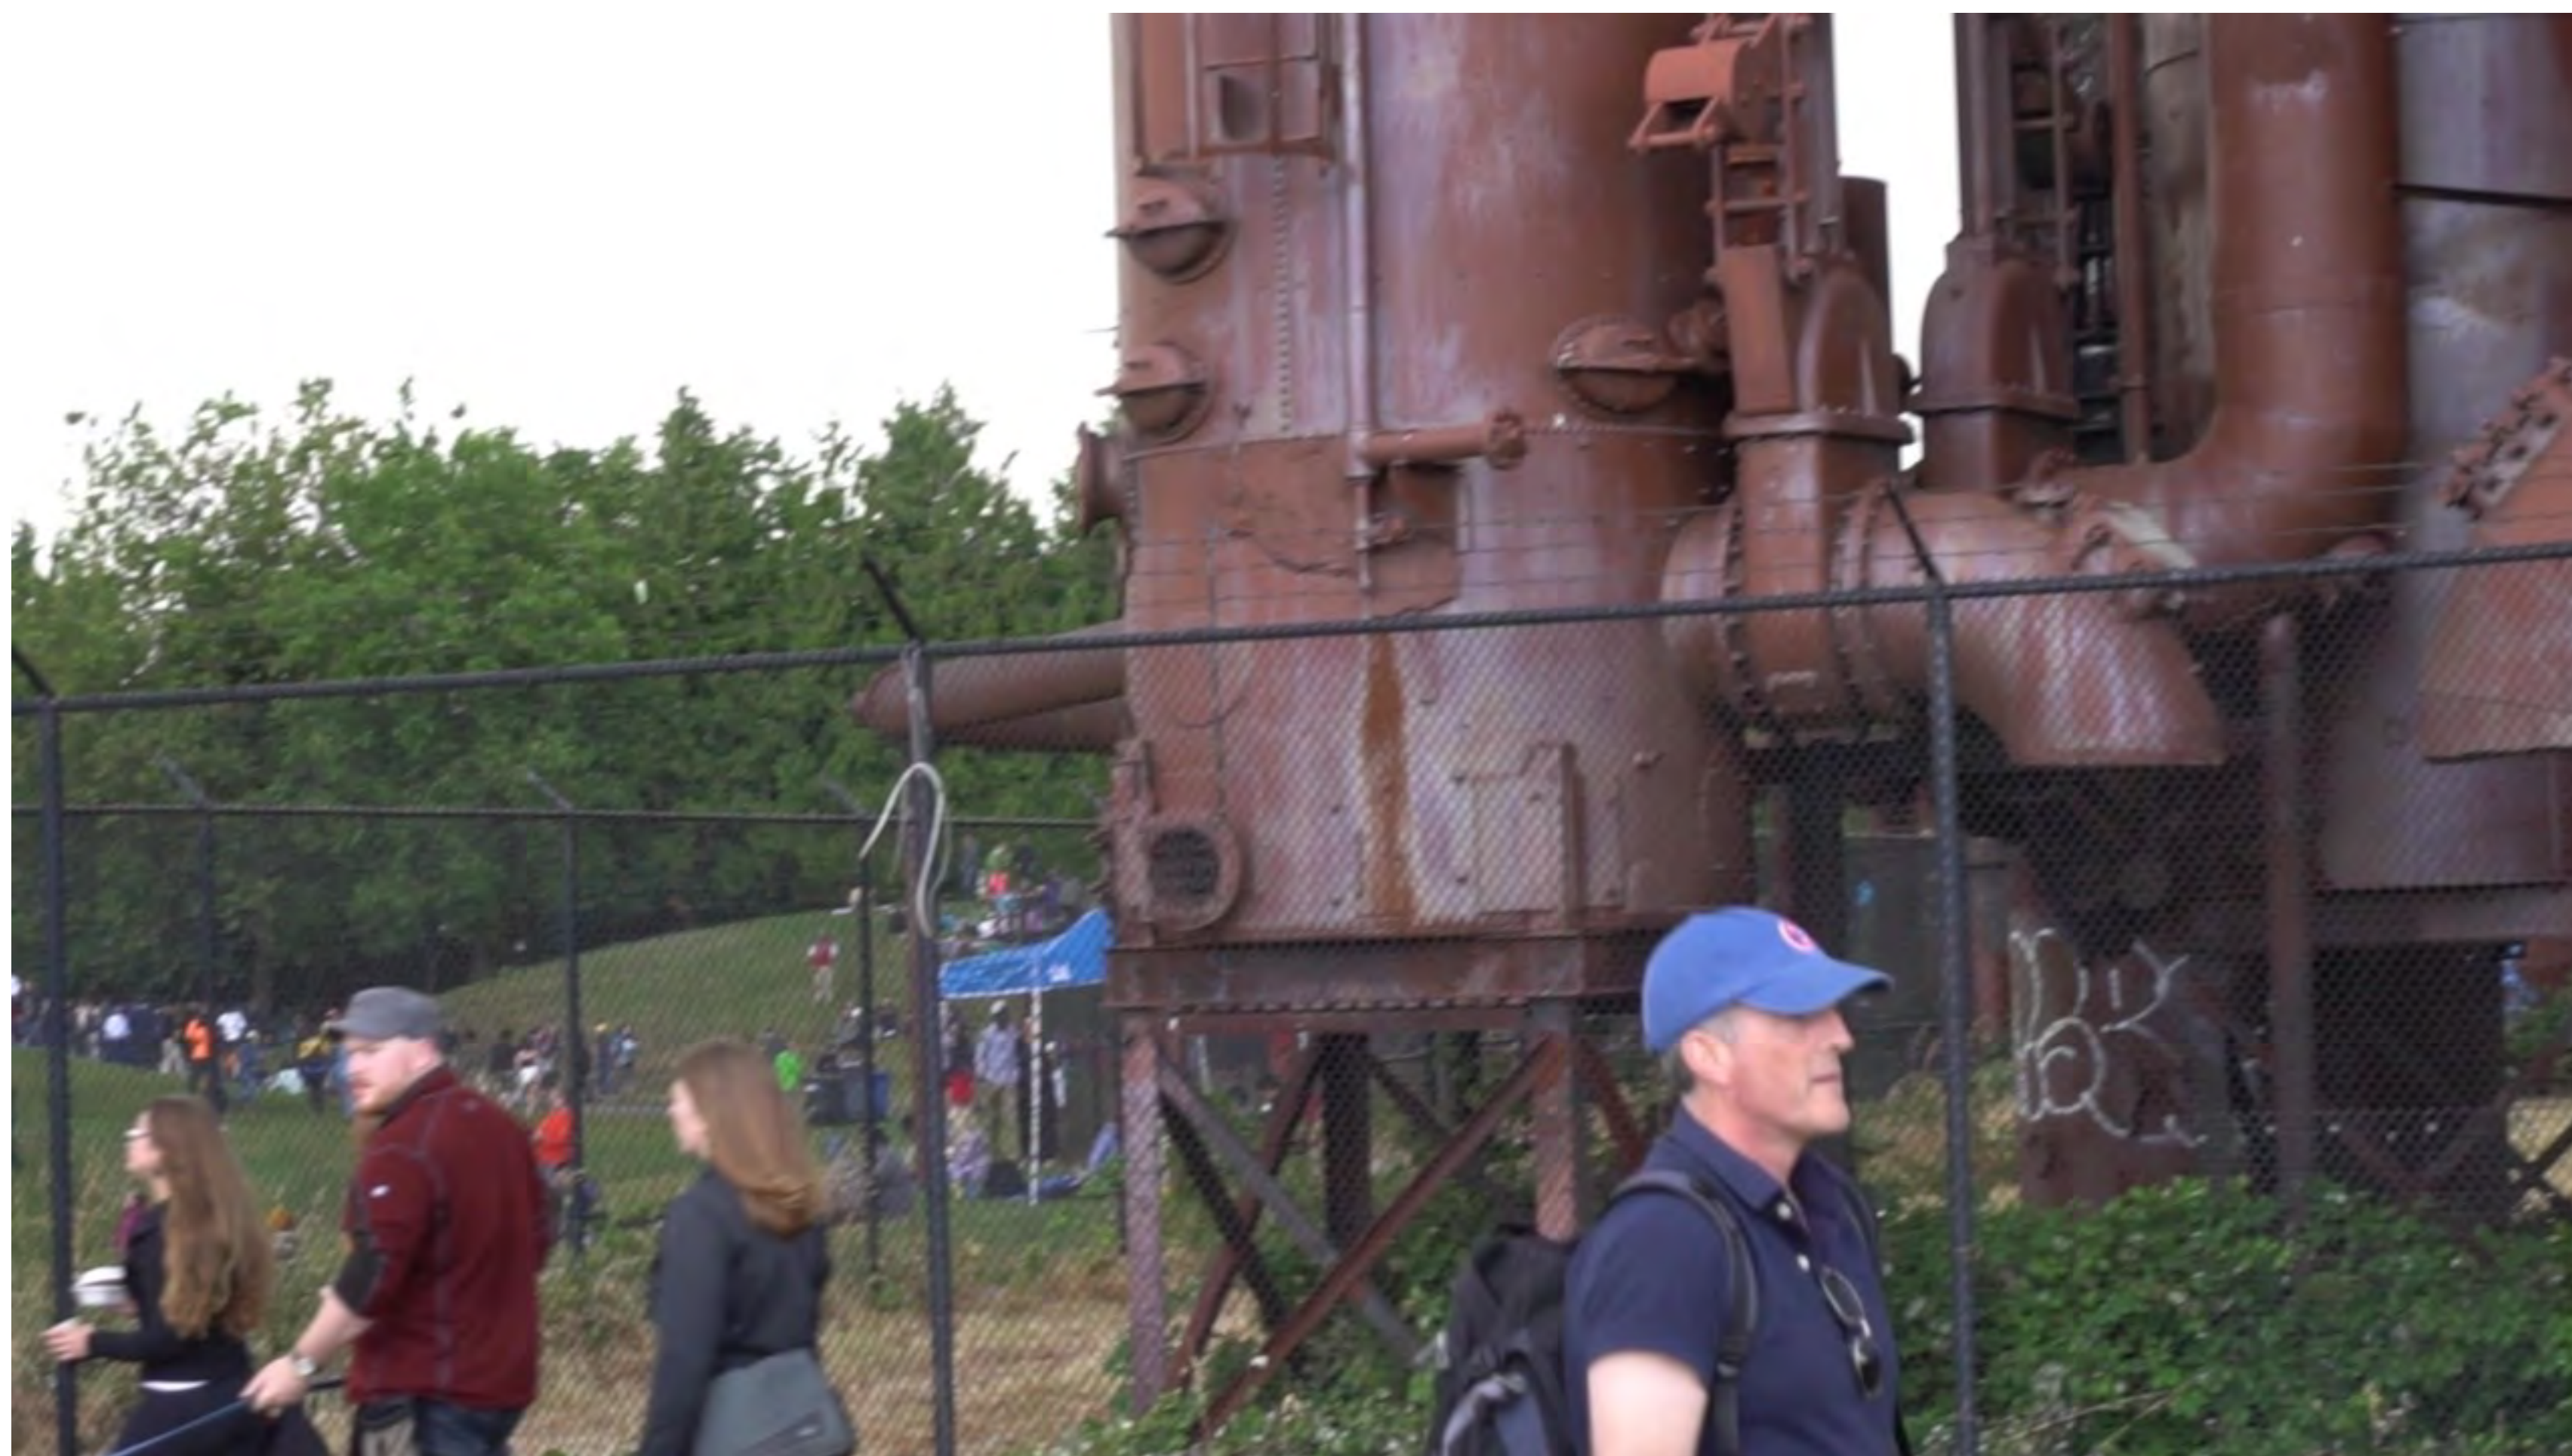

ground-truth



Full-size Images in Fig. 6

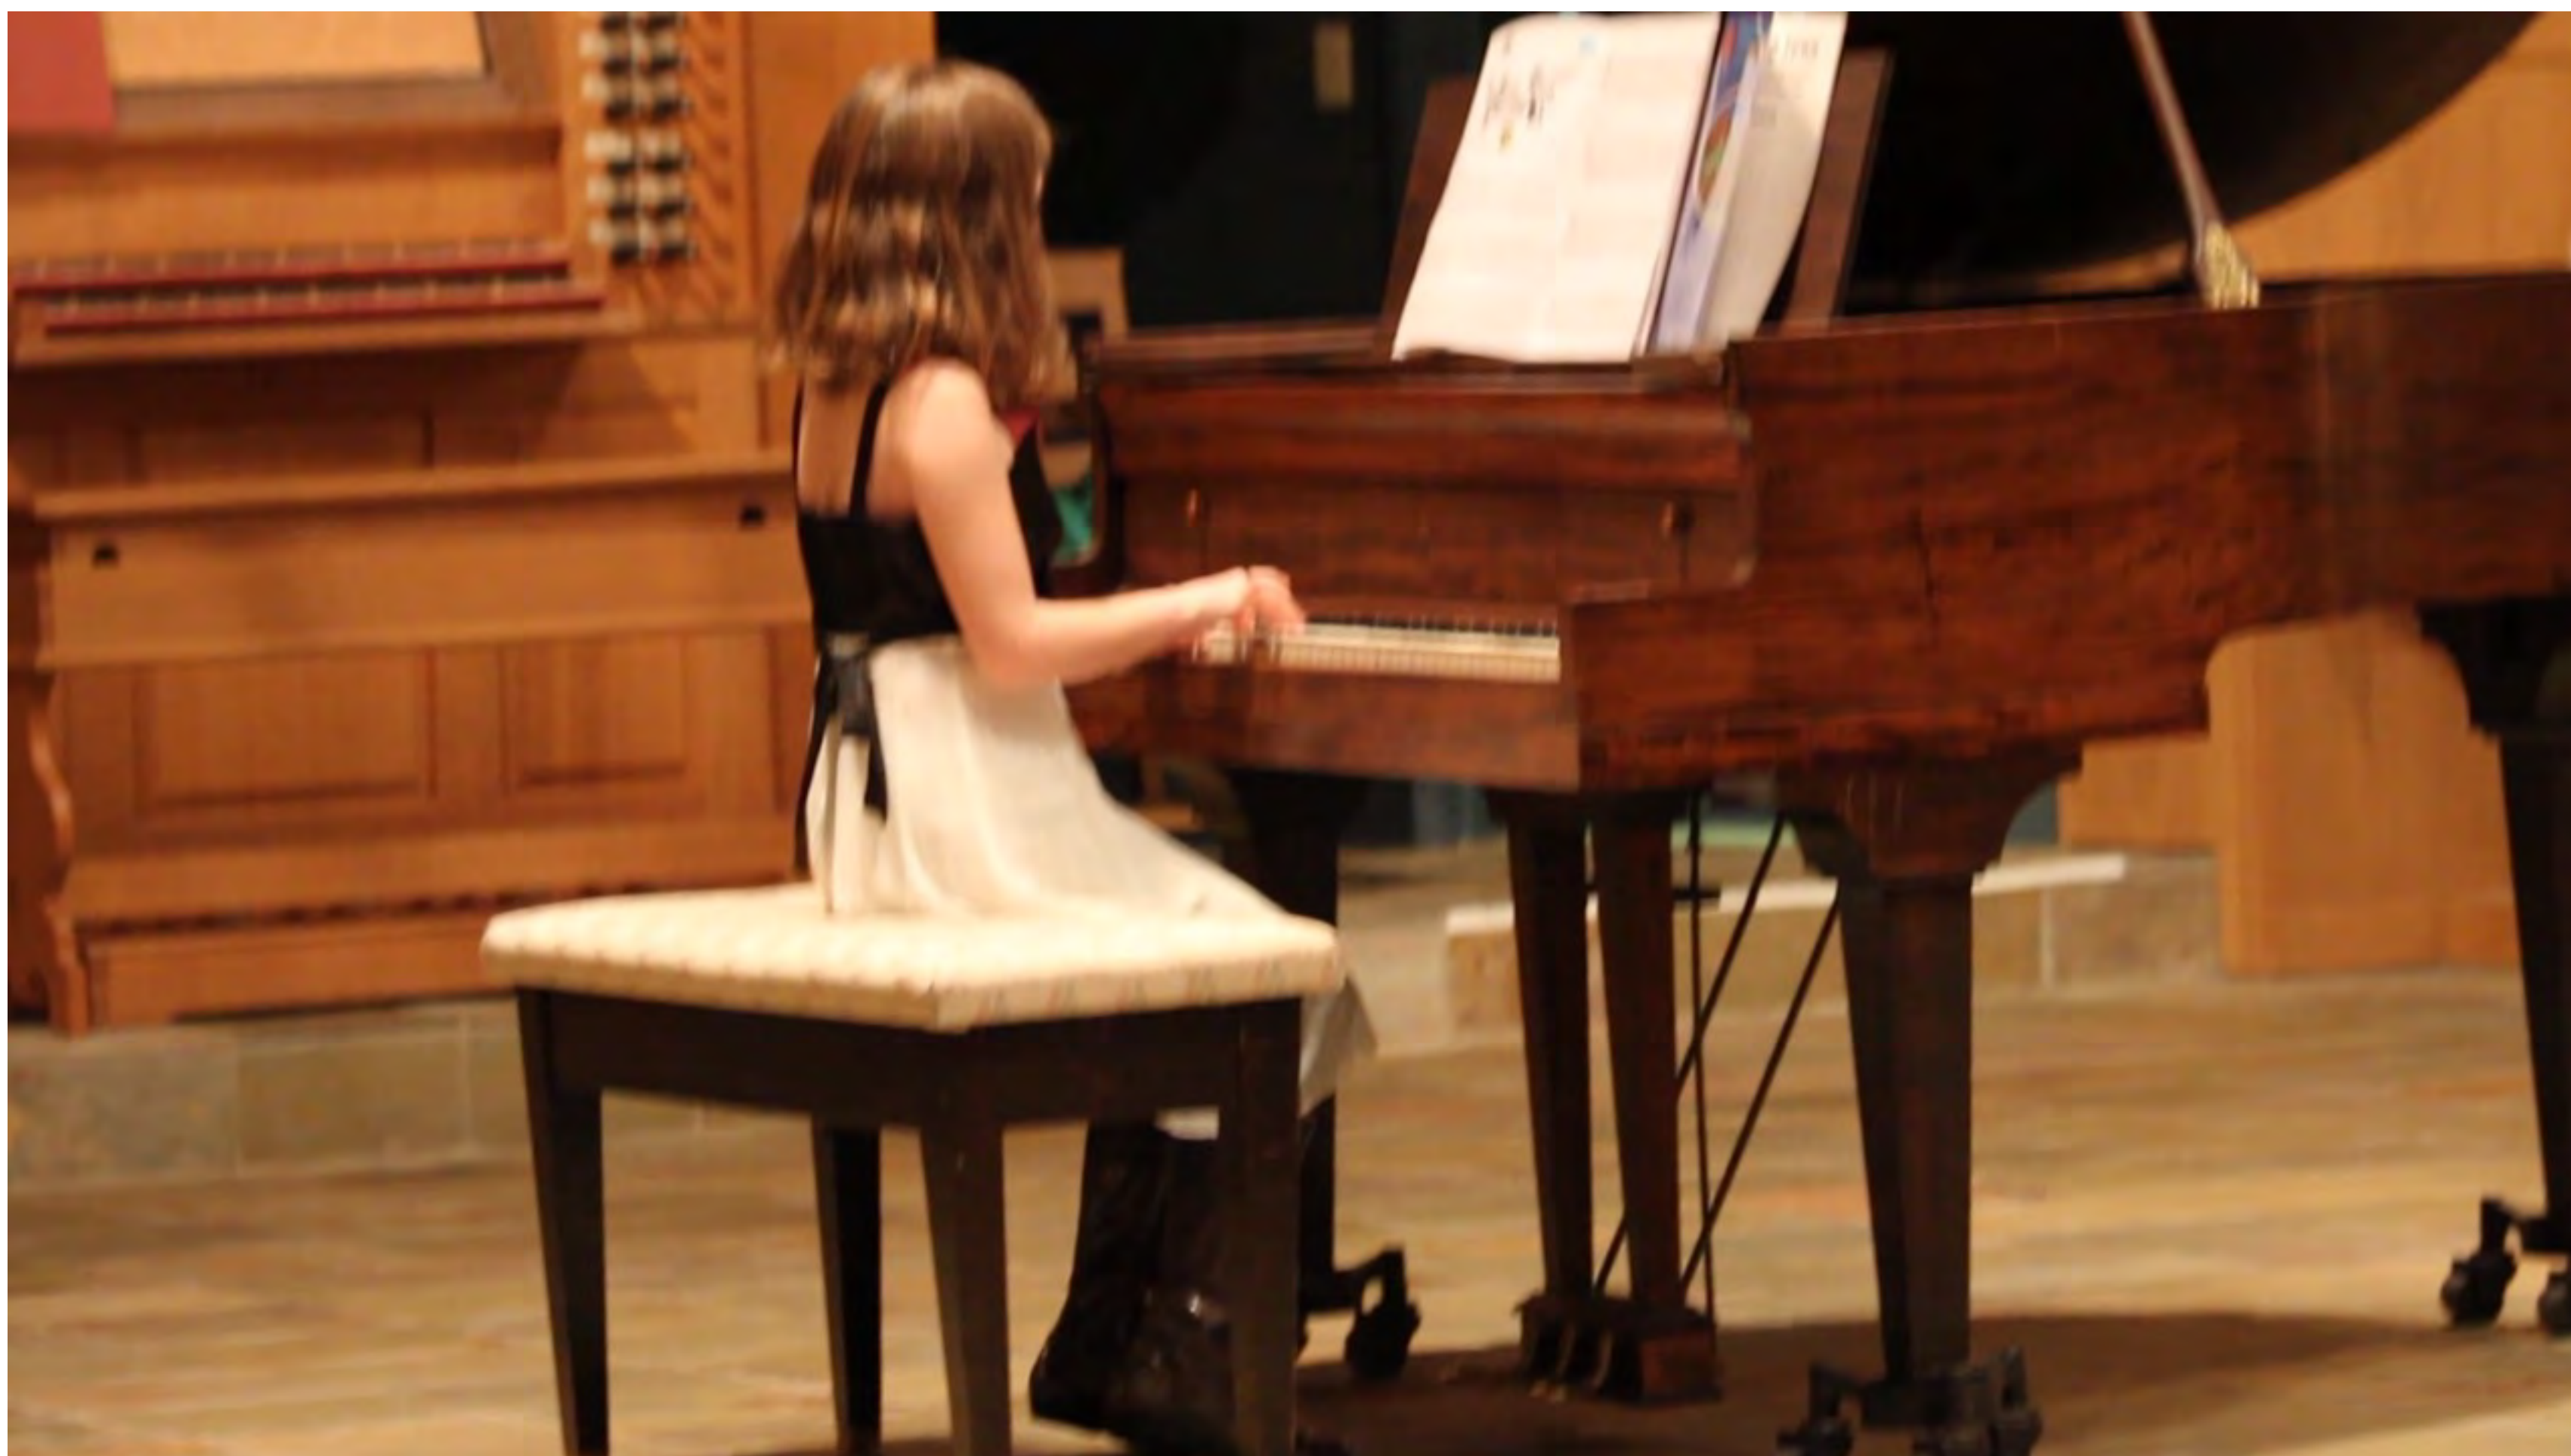

input



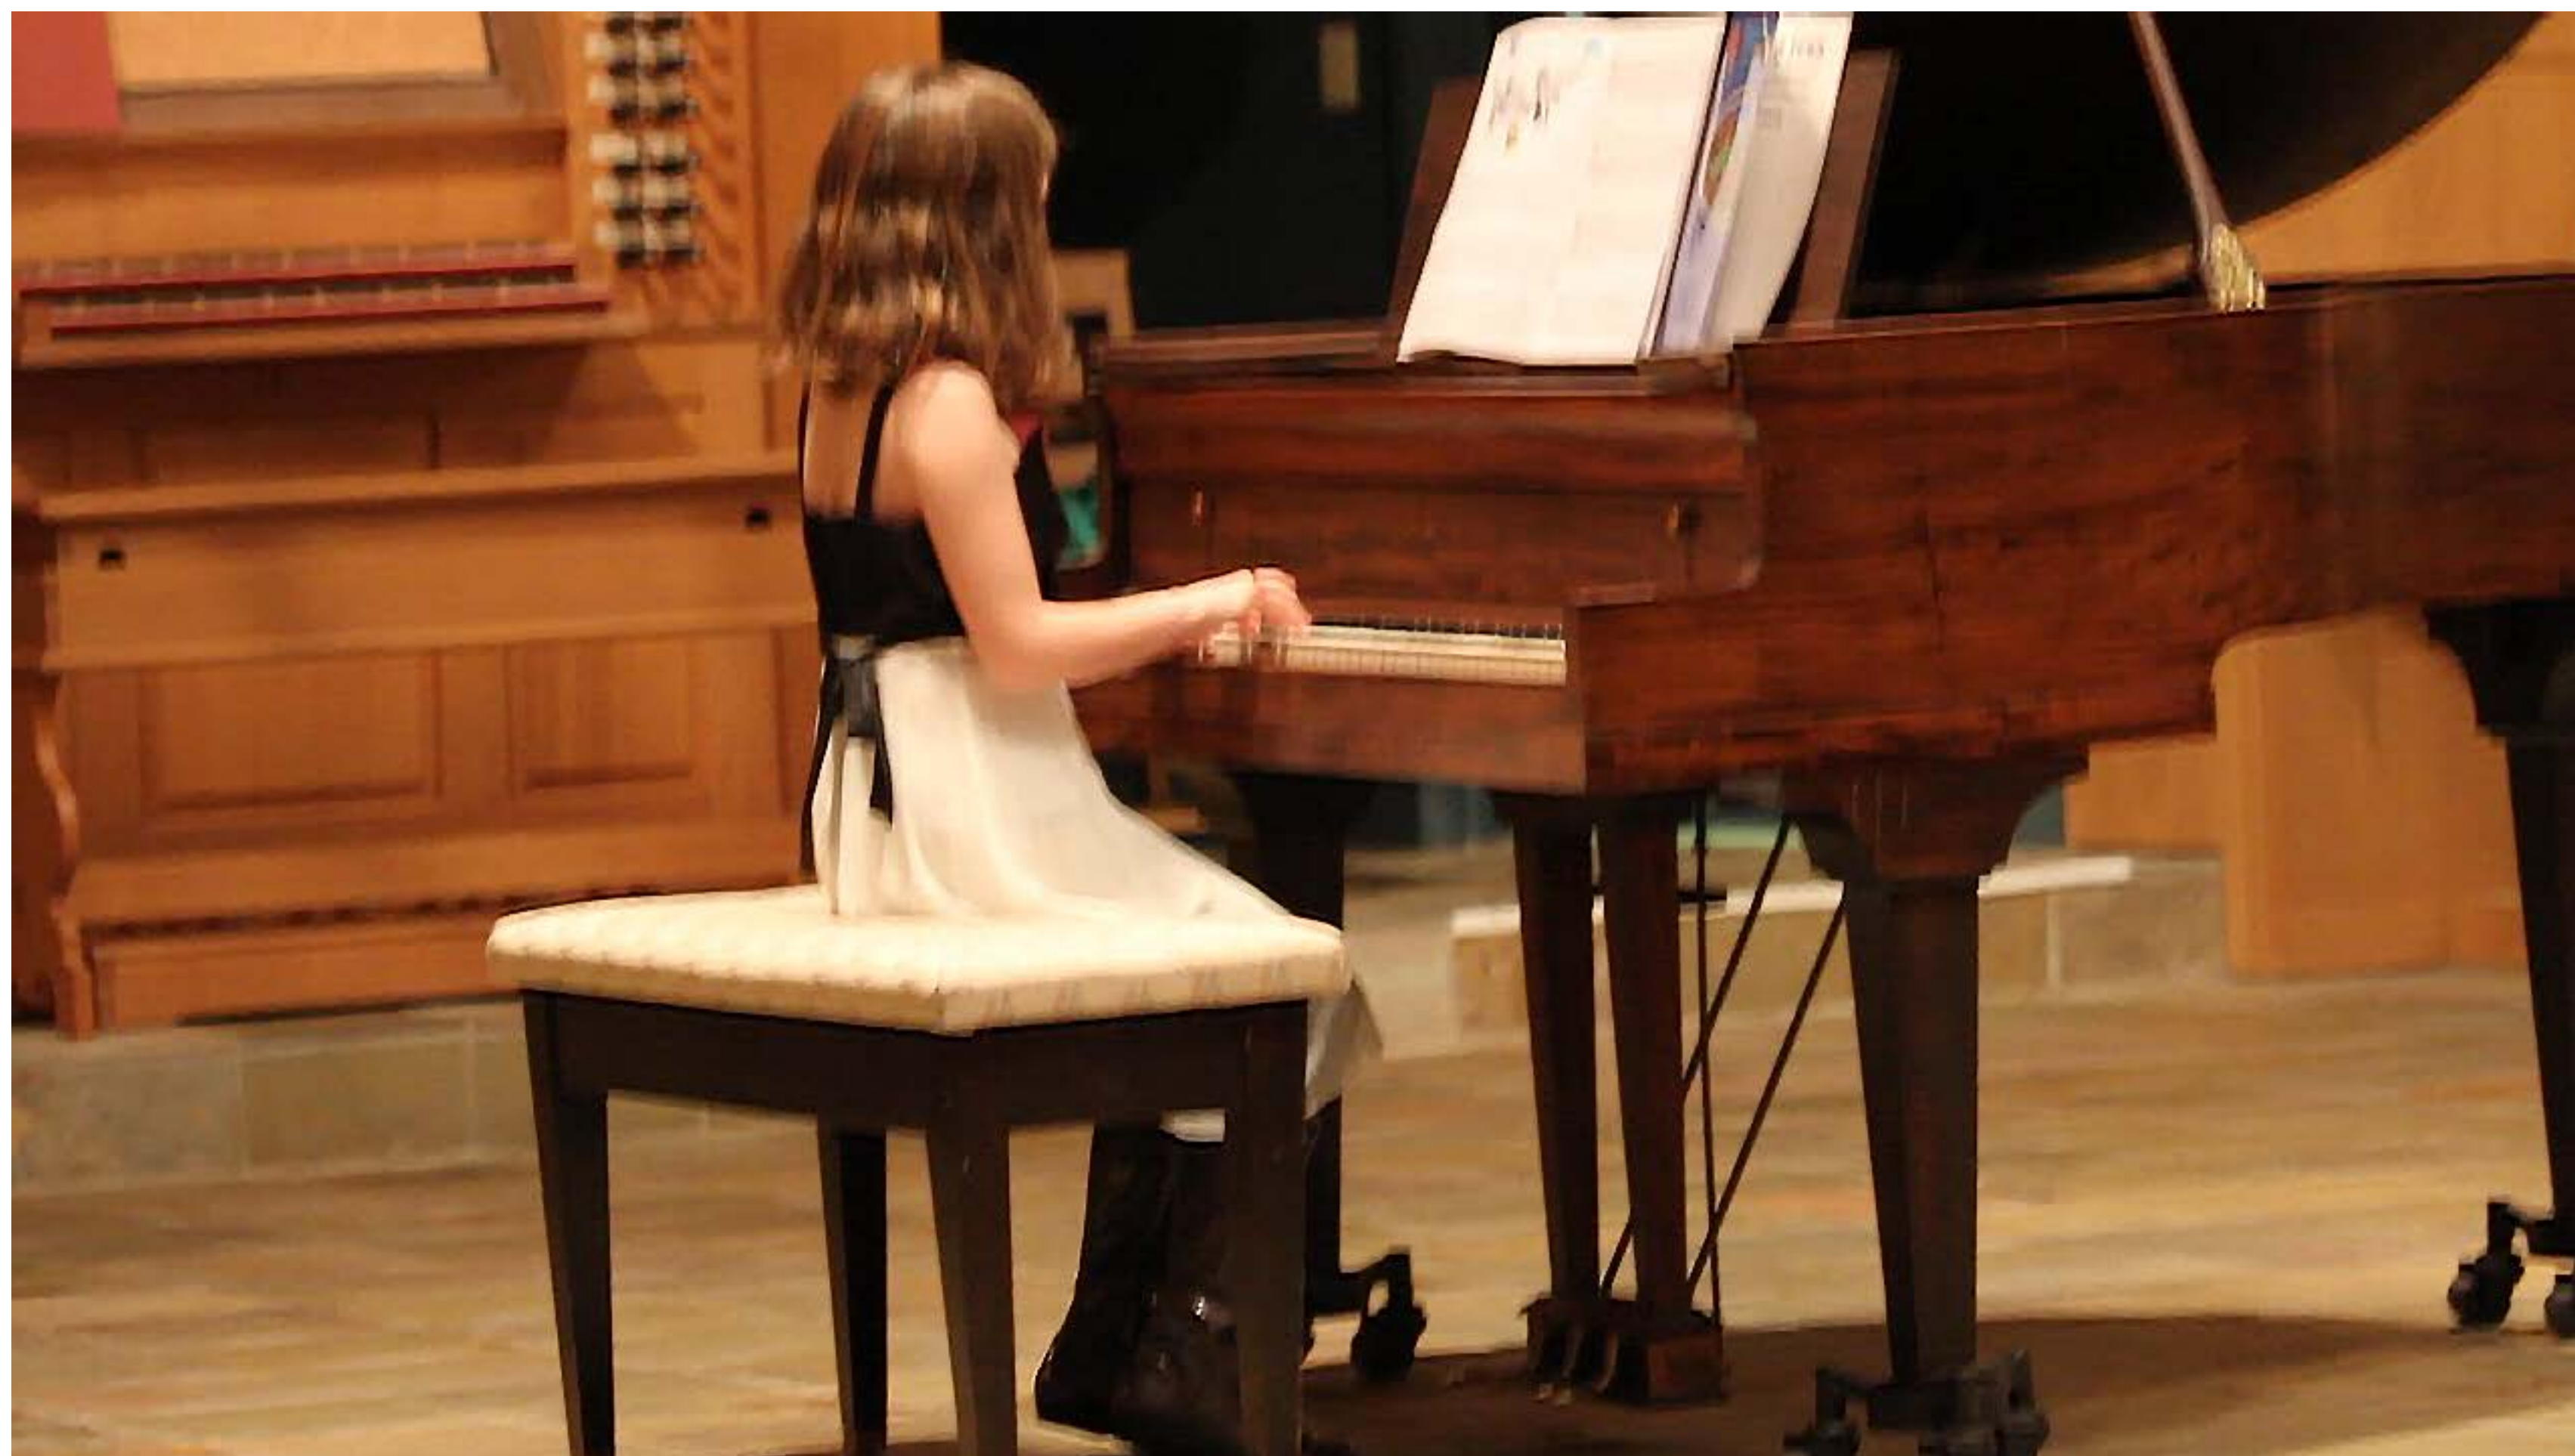

L0Deblur [48]



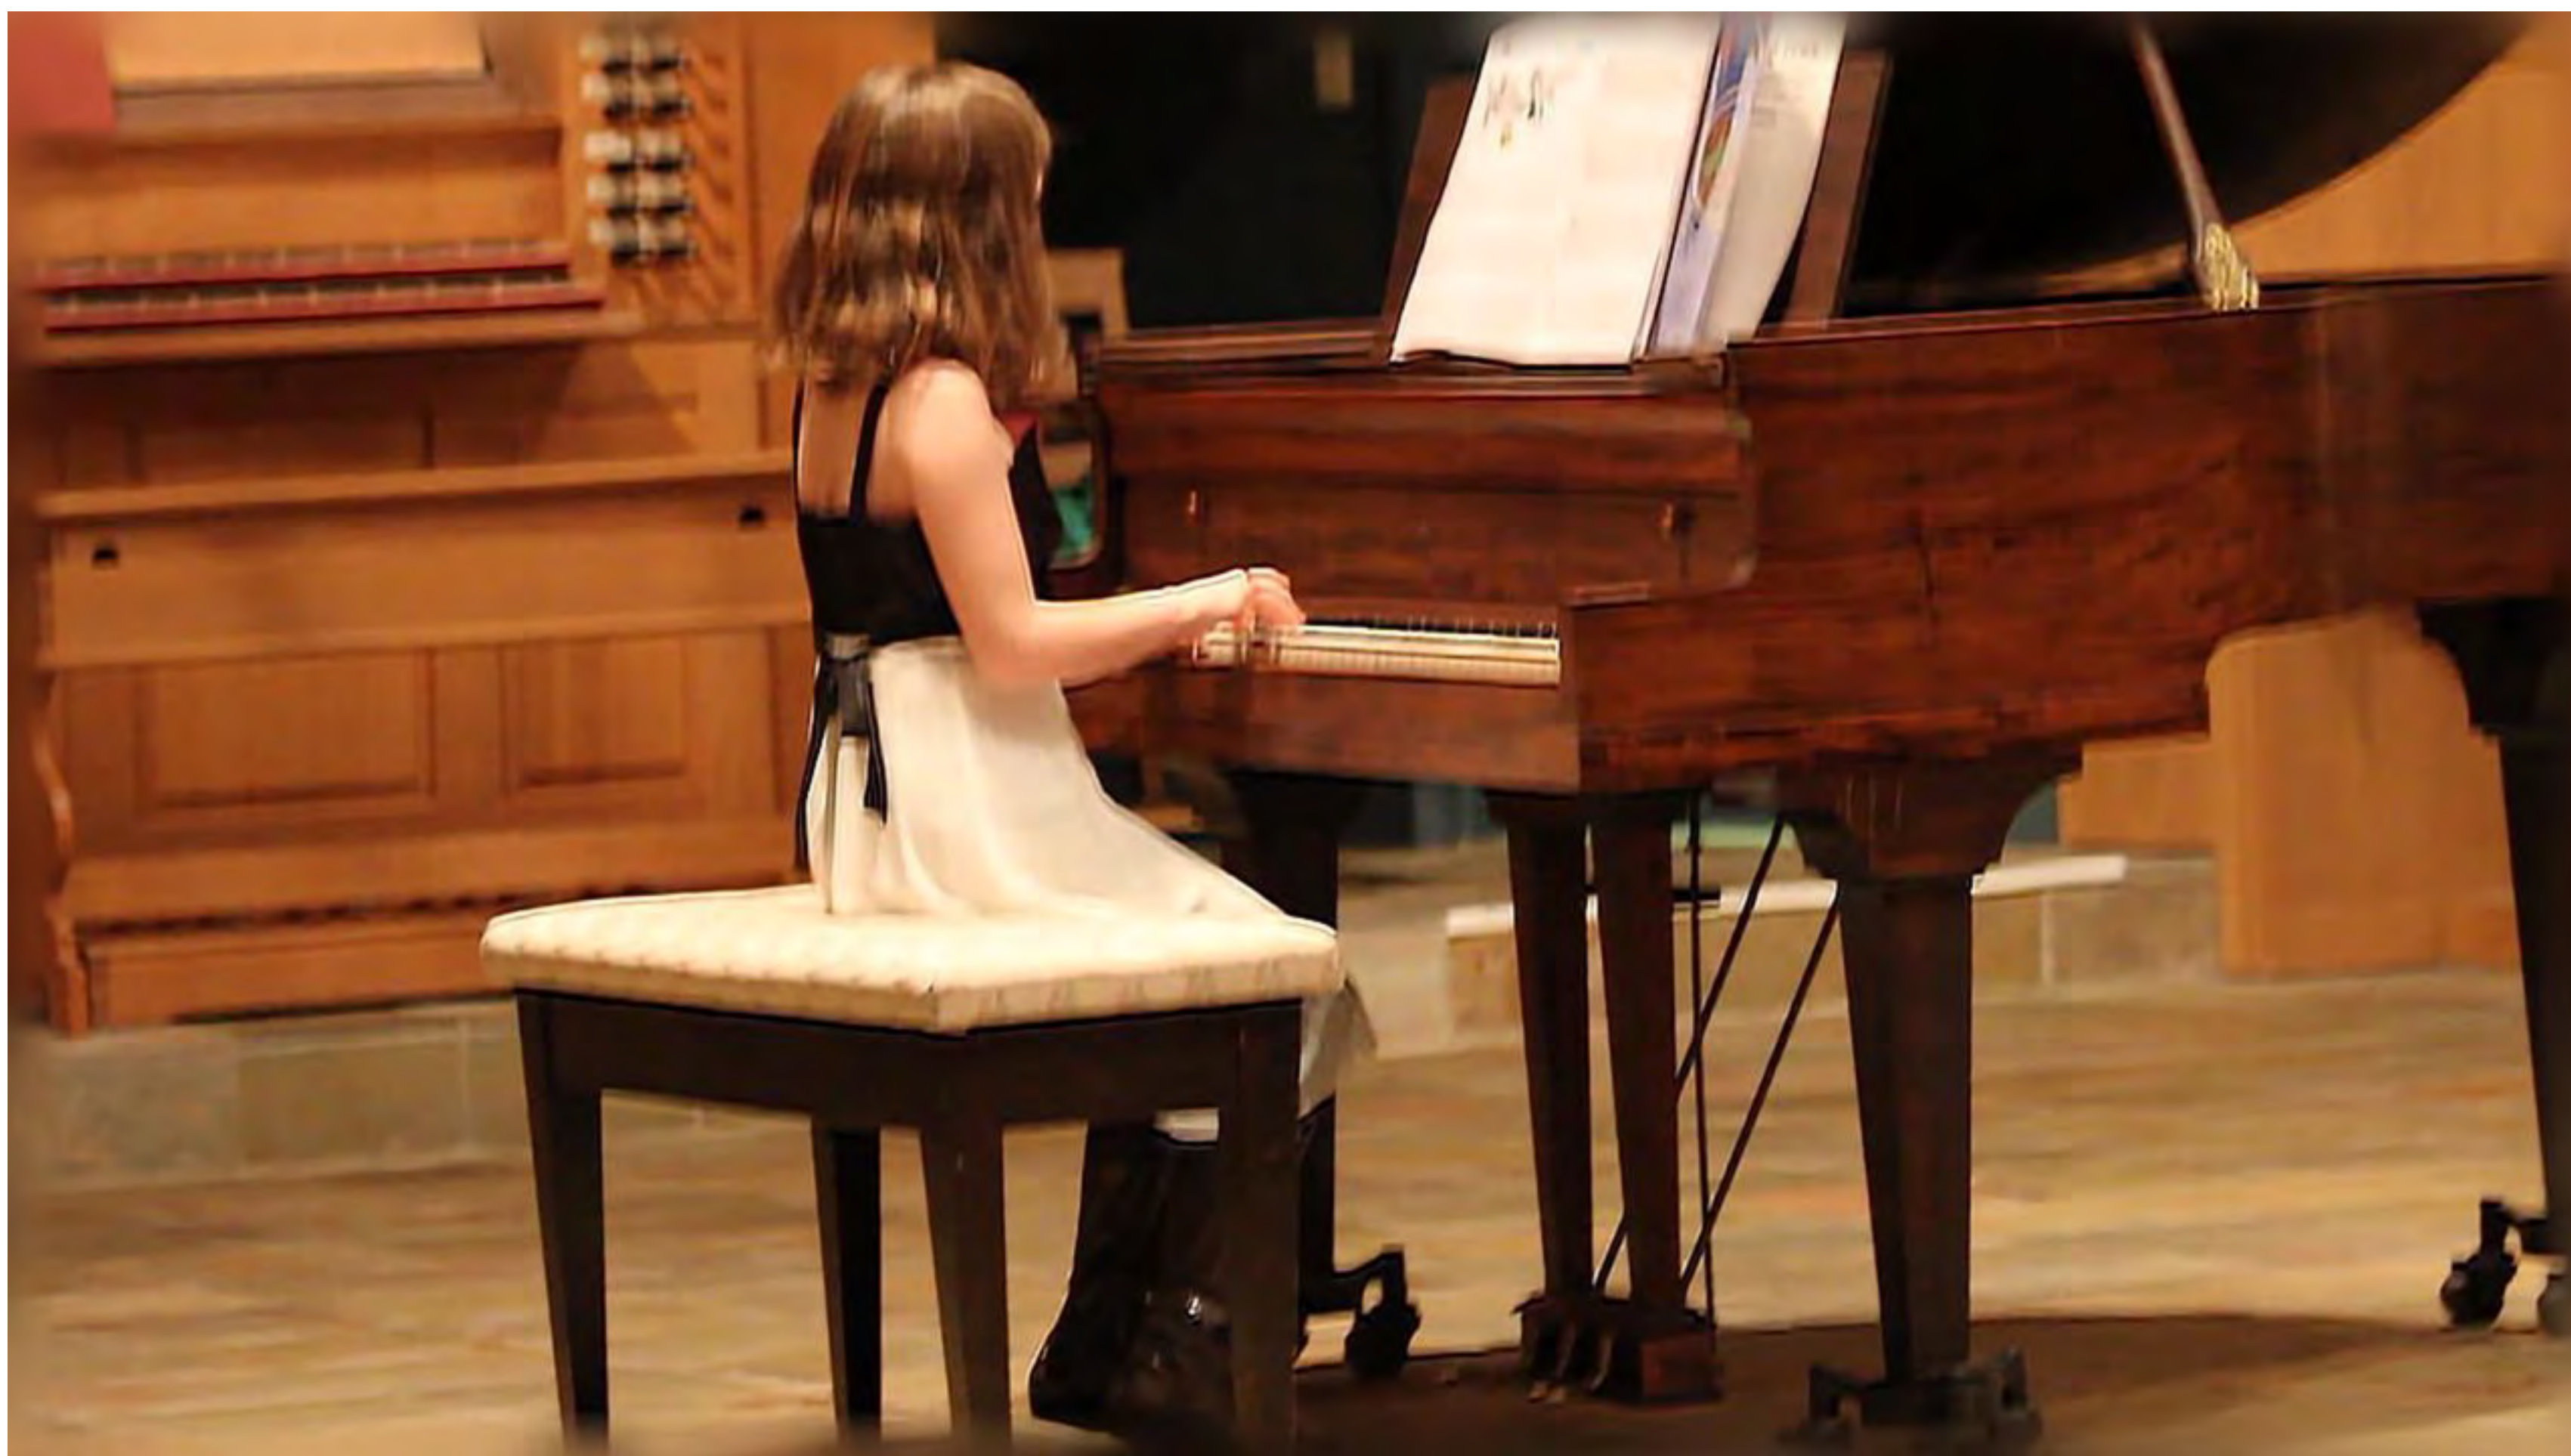

Neural [1]



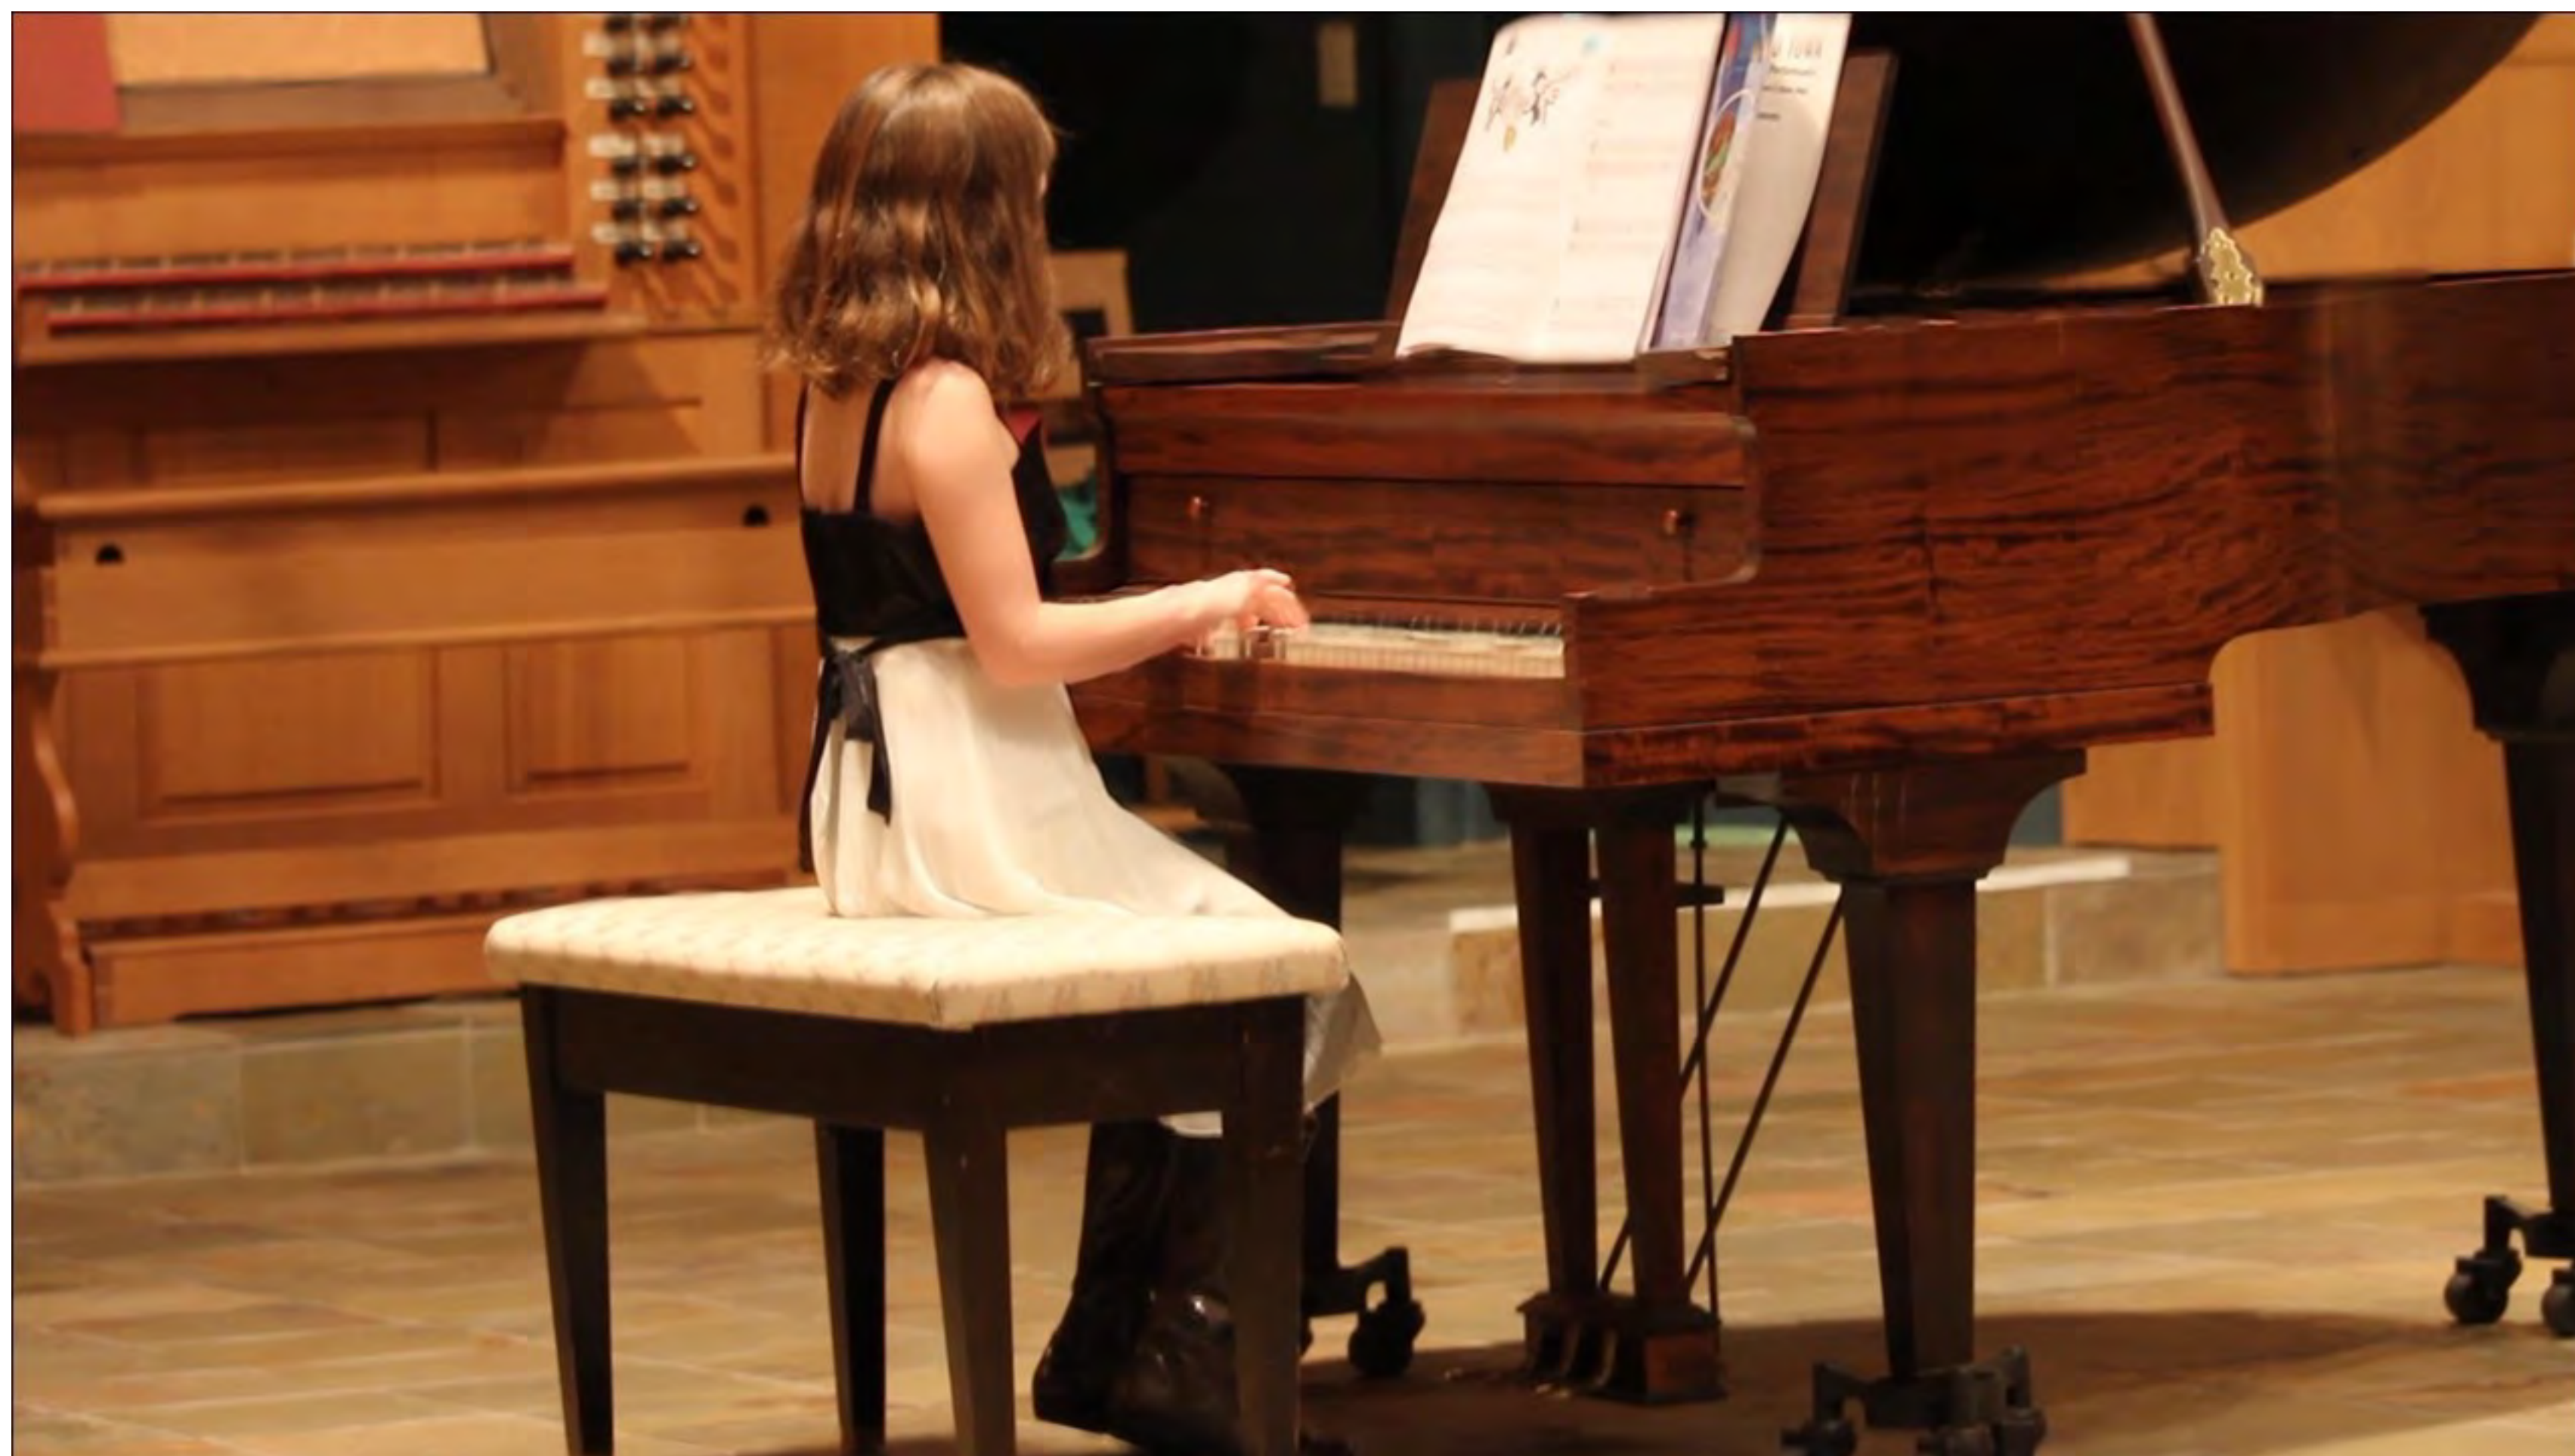

WFA [5]



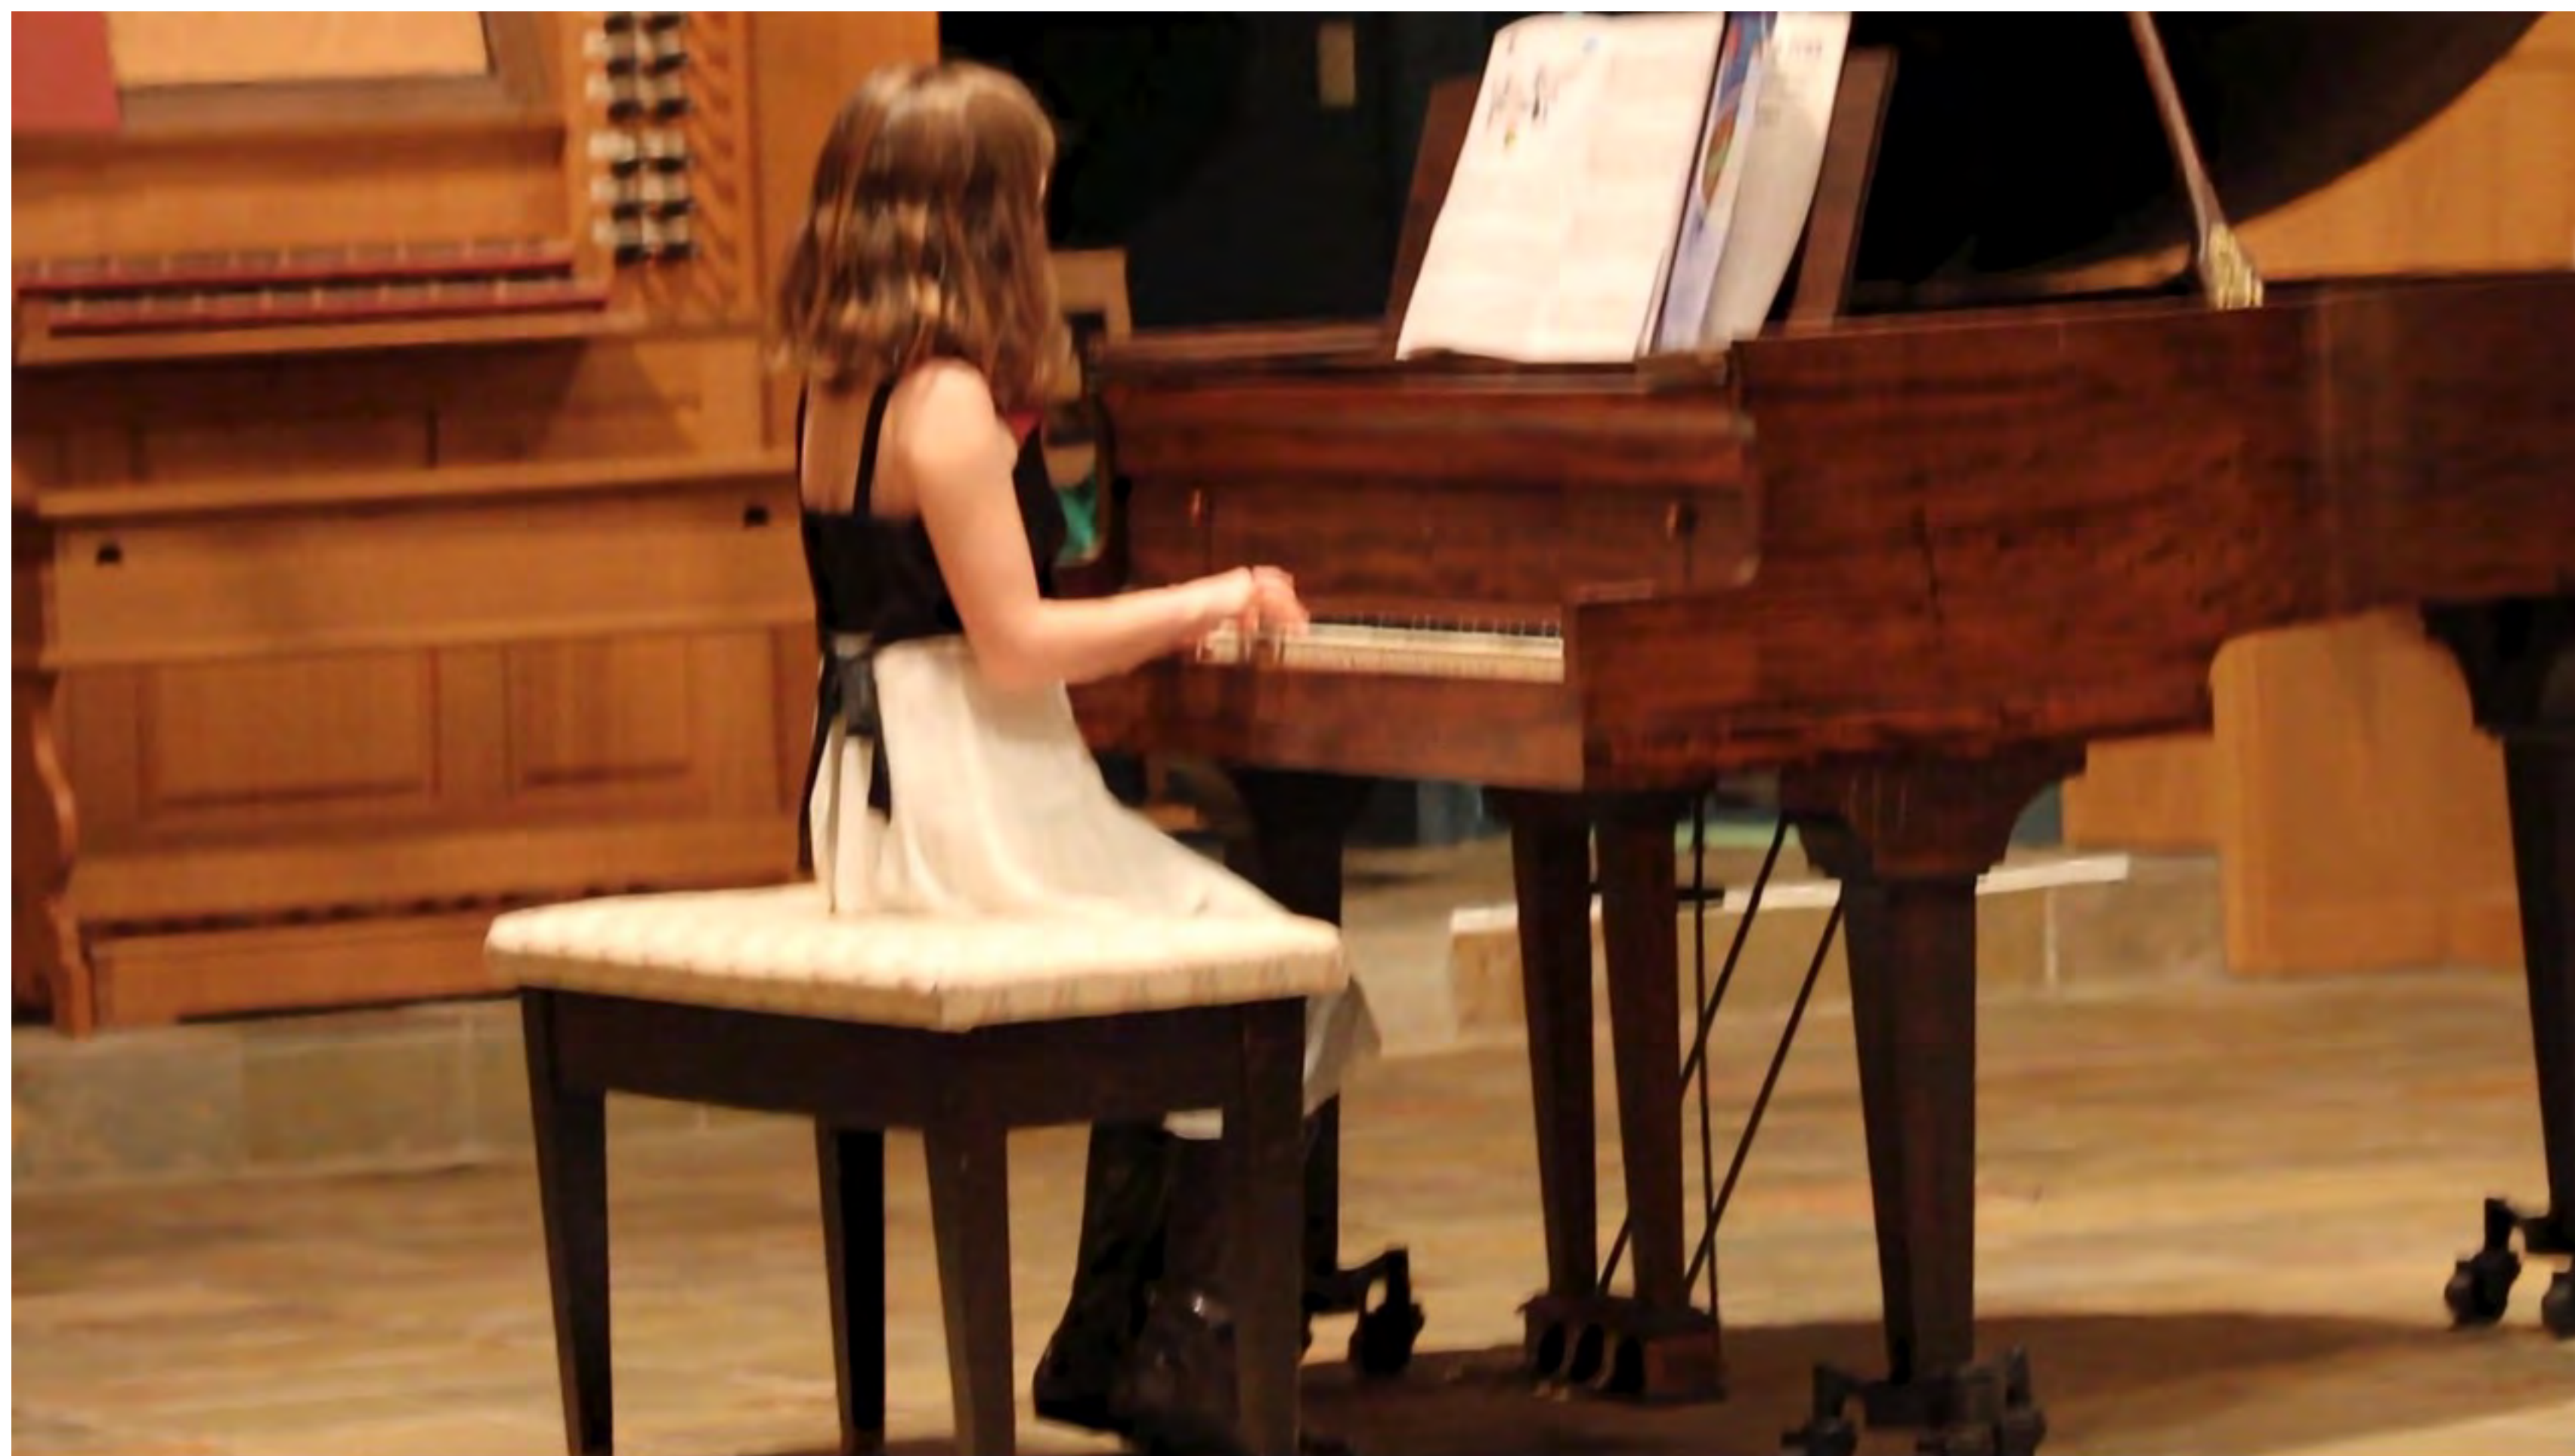

DBN+Single



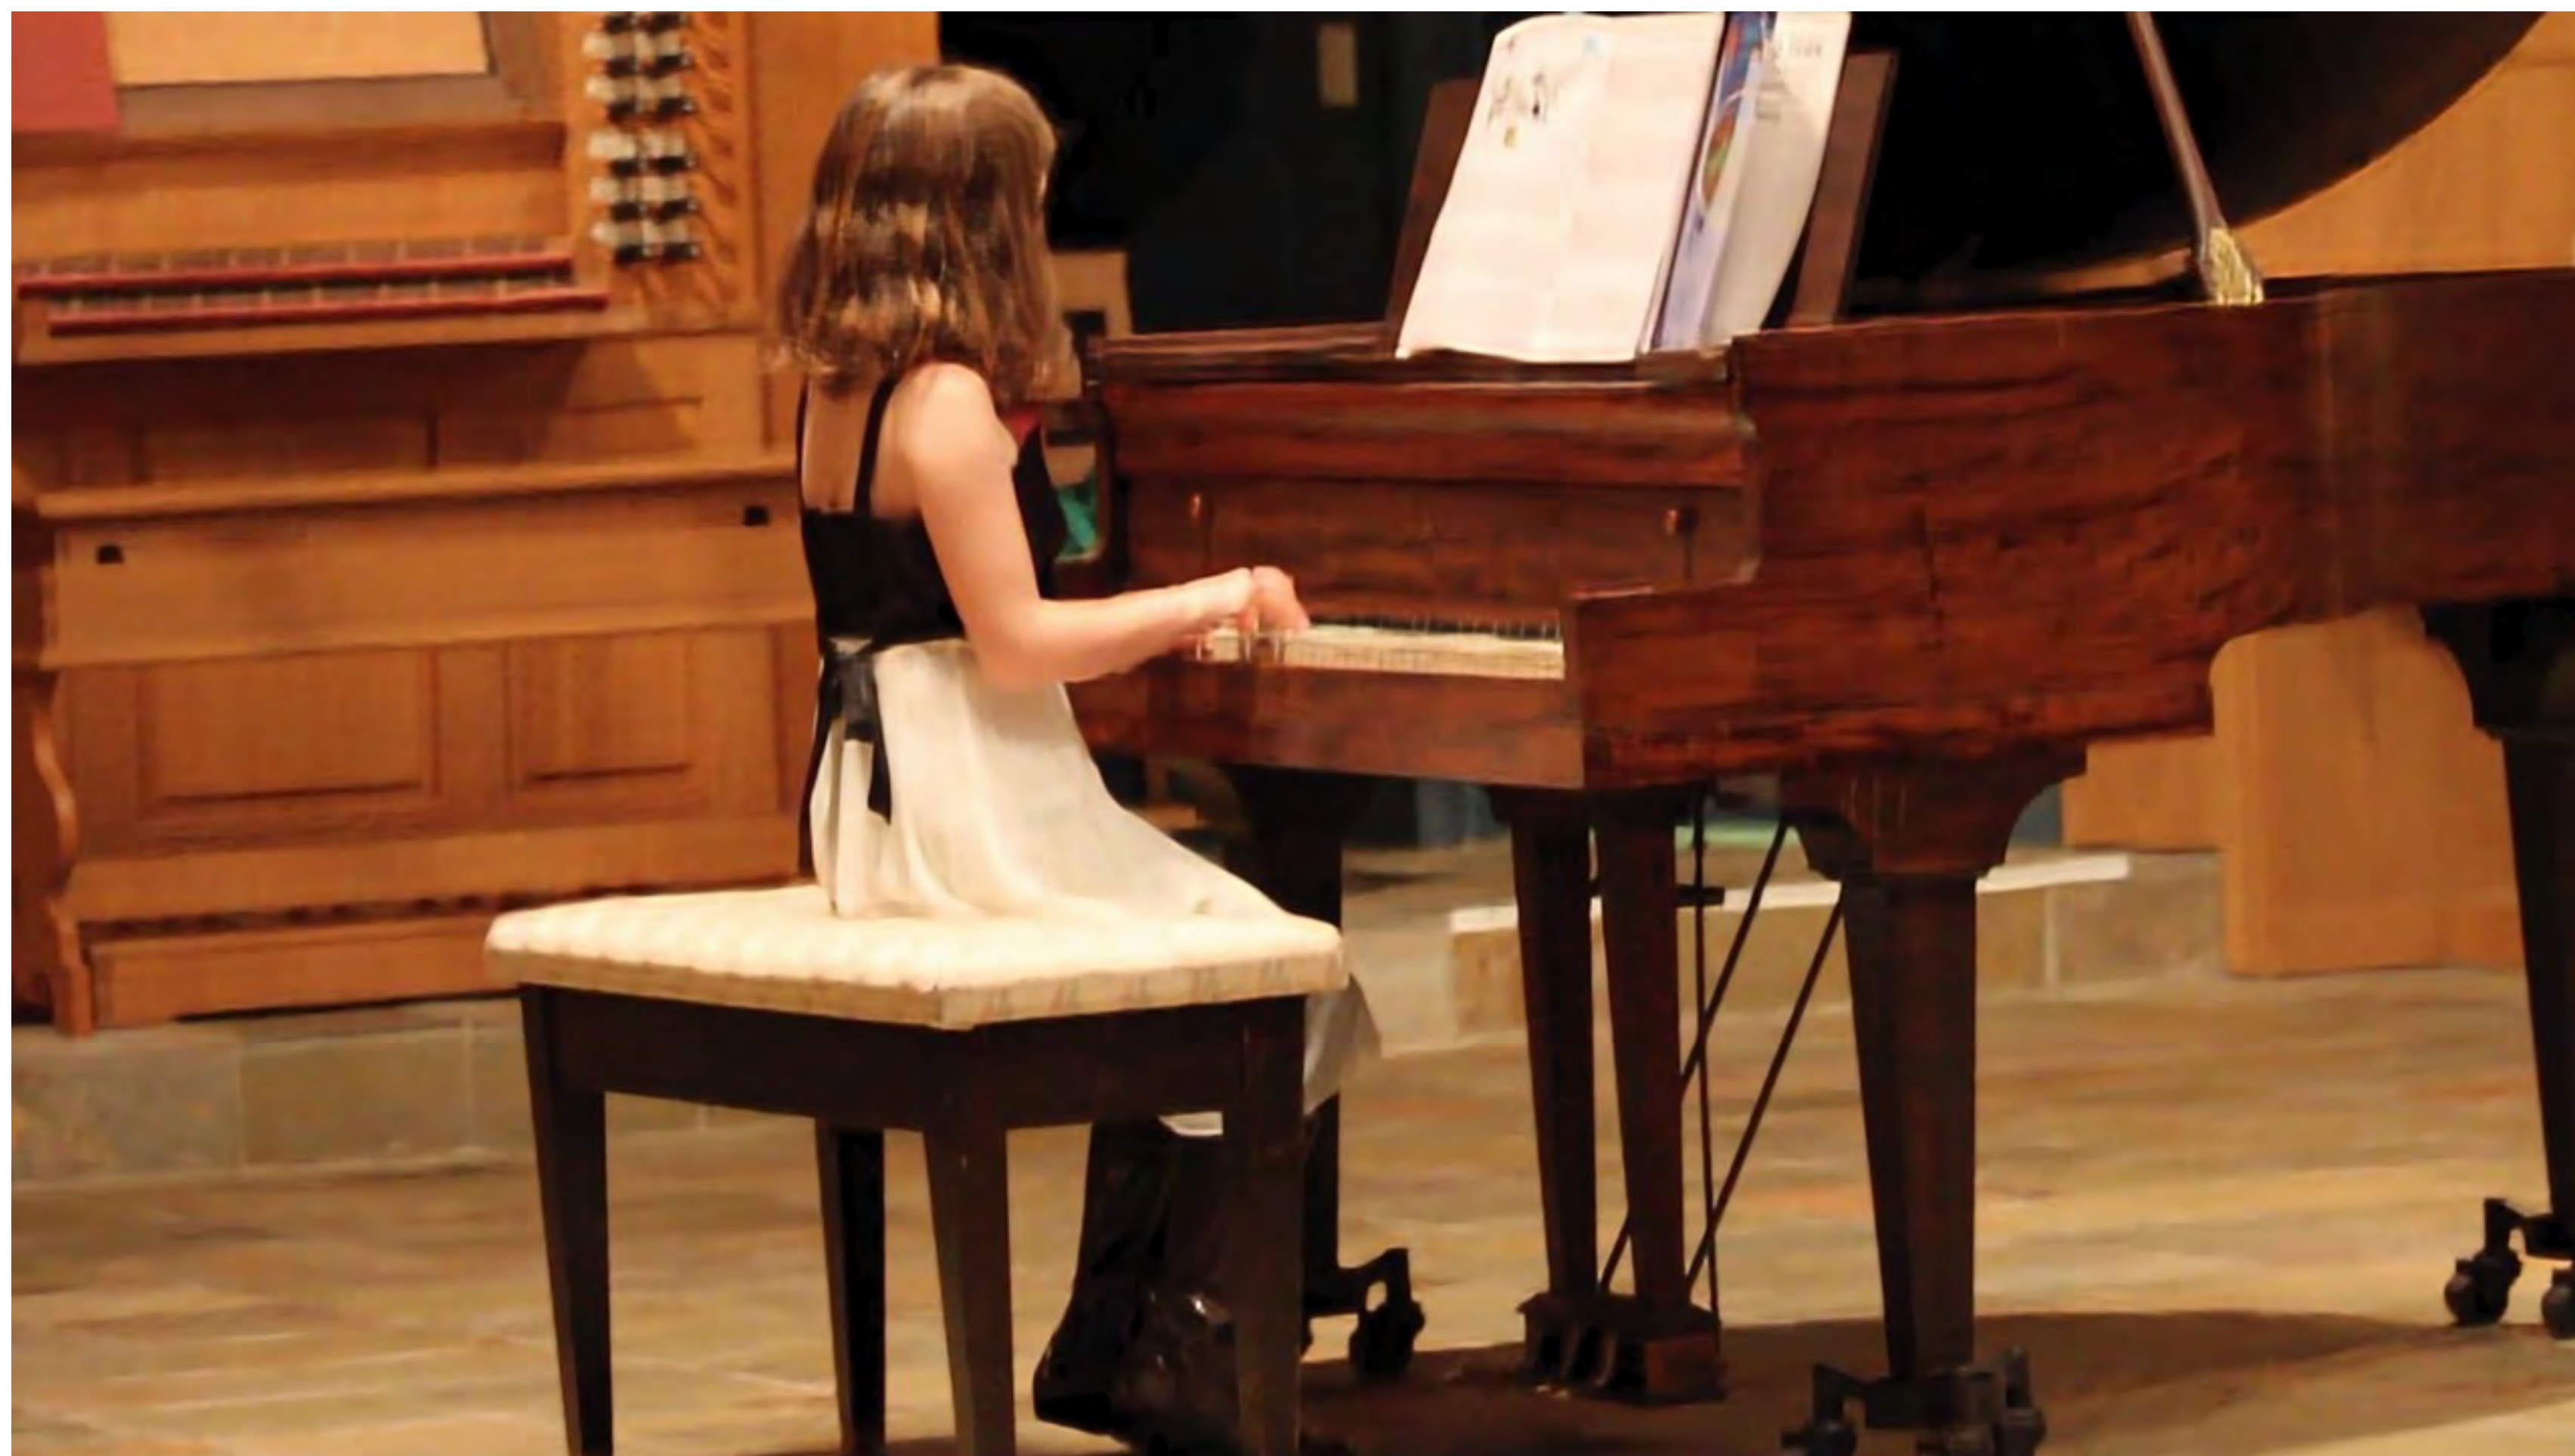

DBN+Noalign



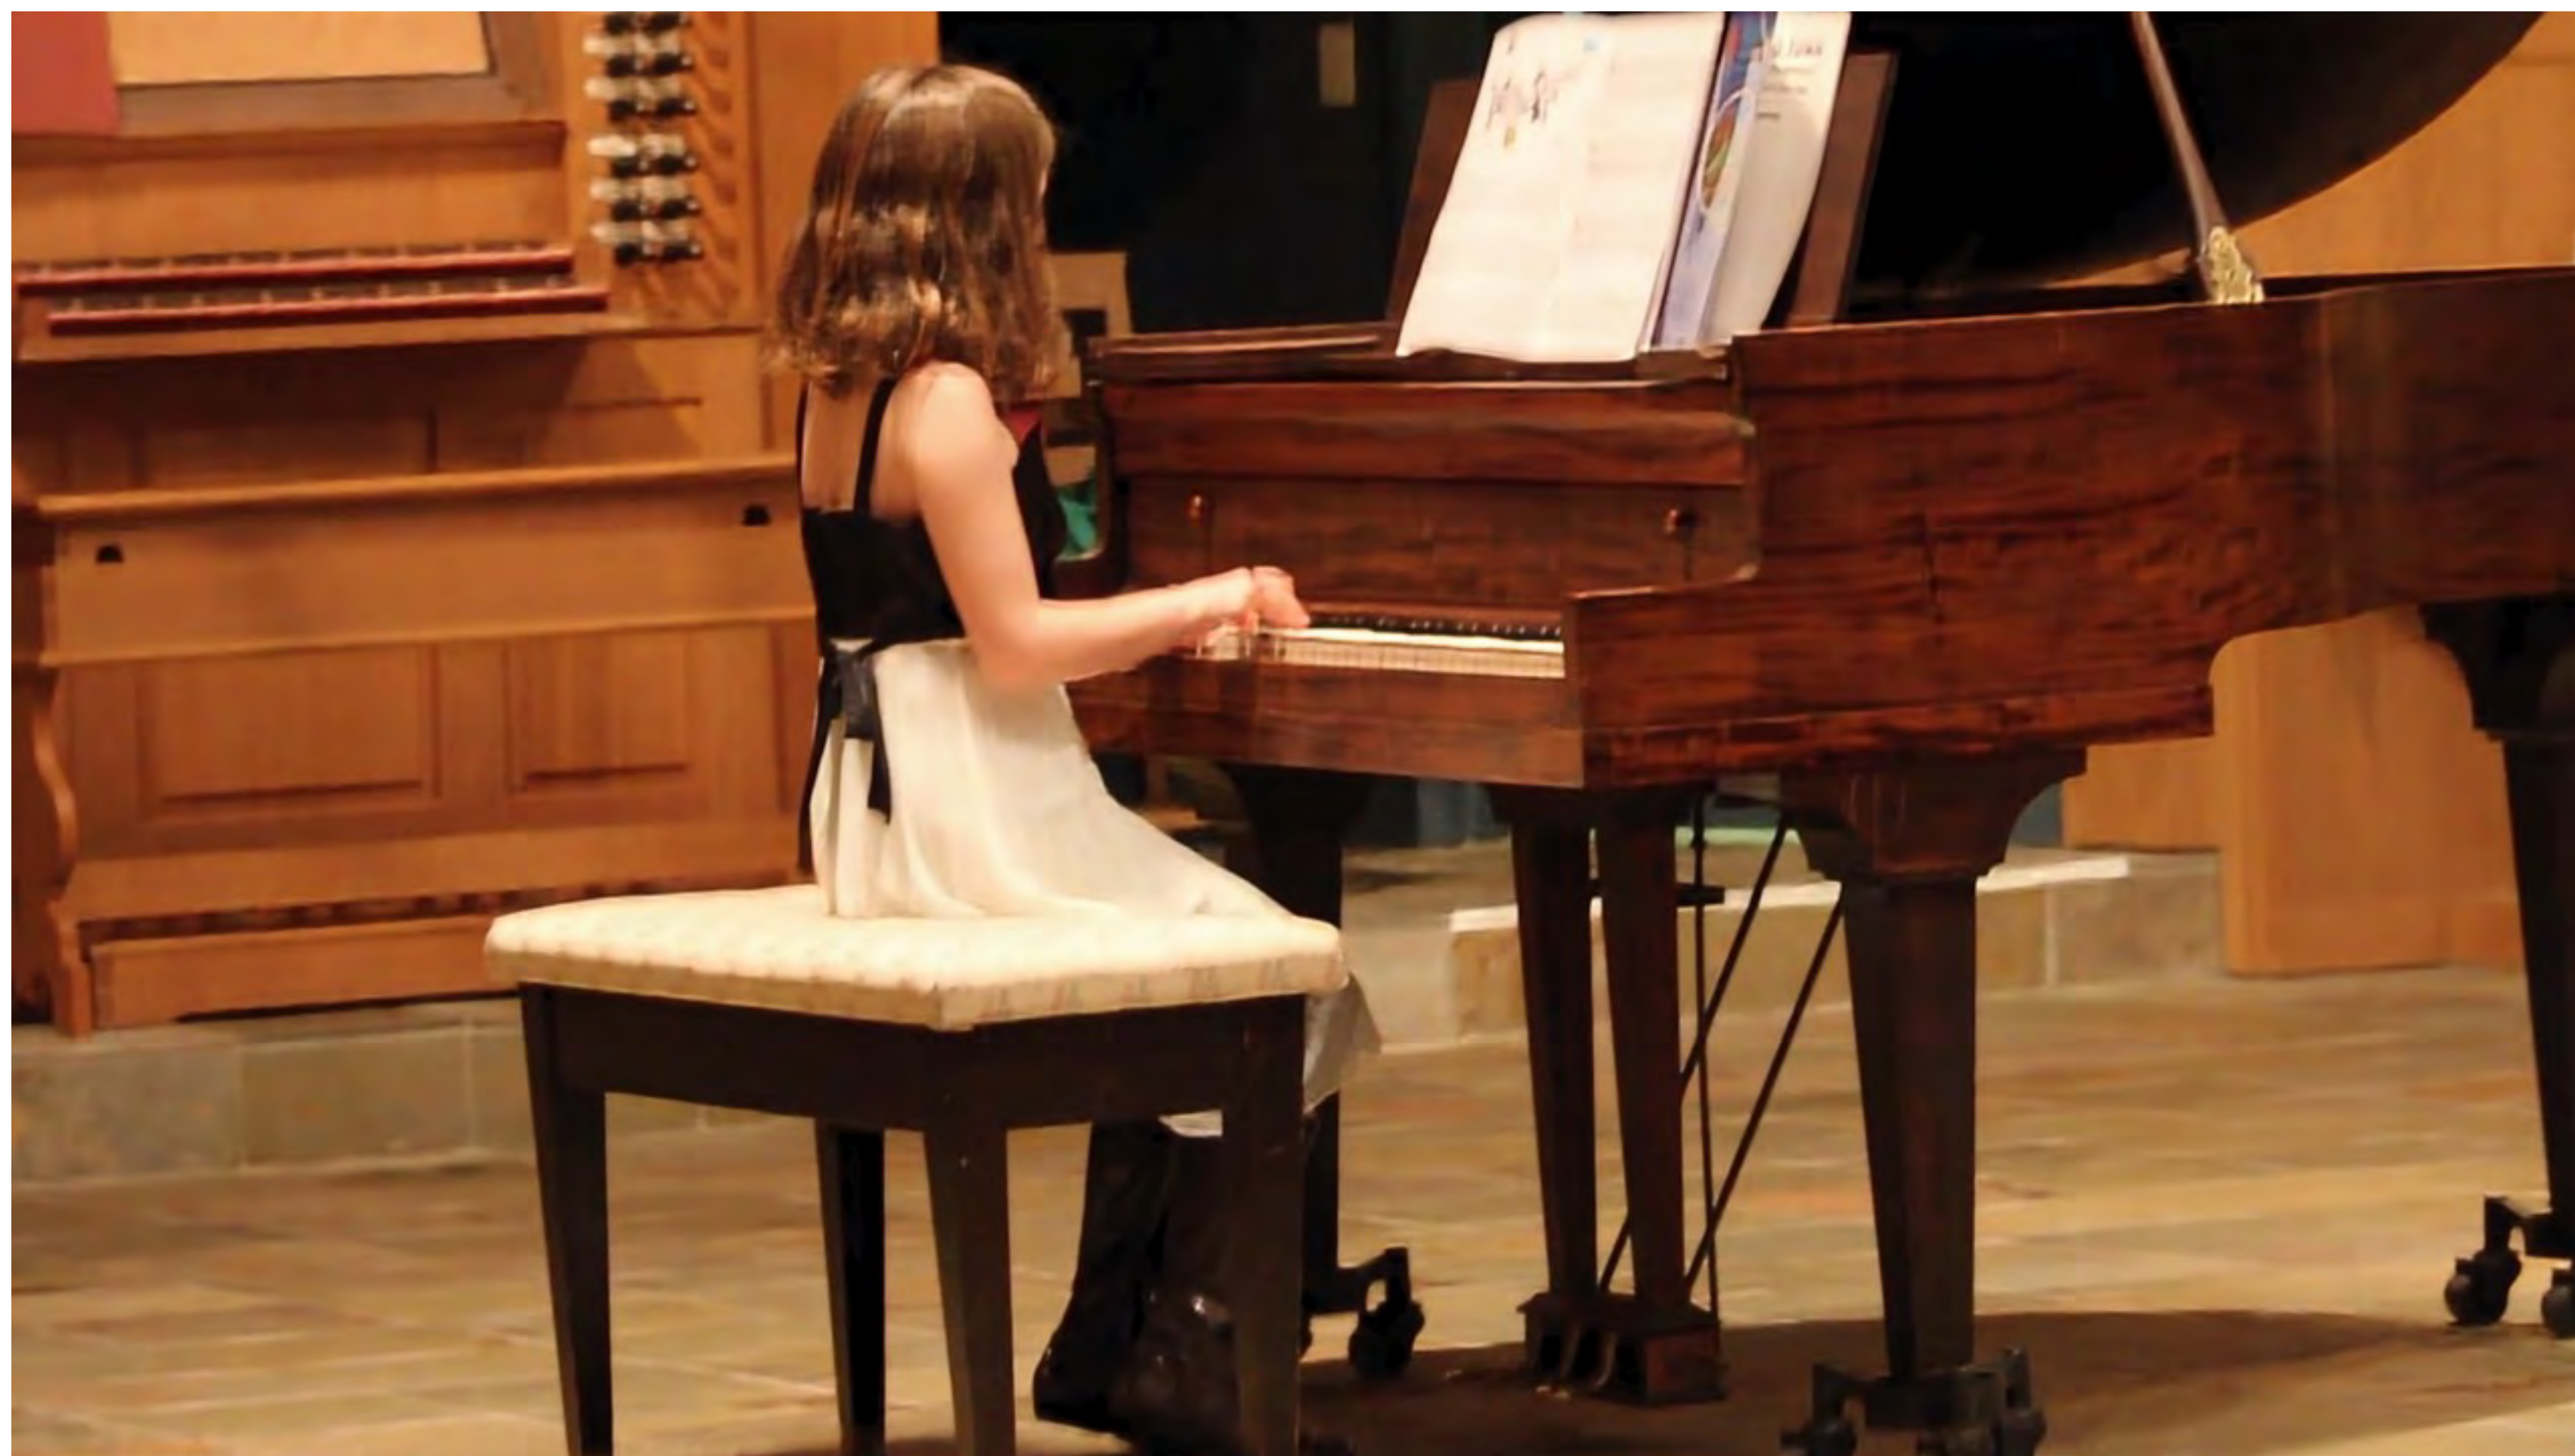

DBN+Homog



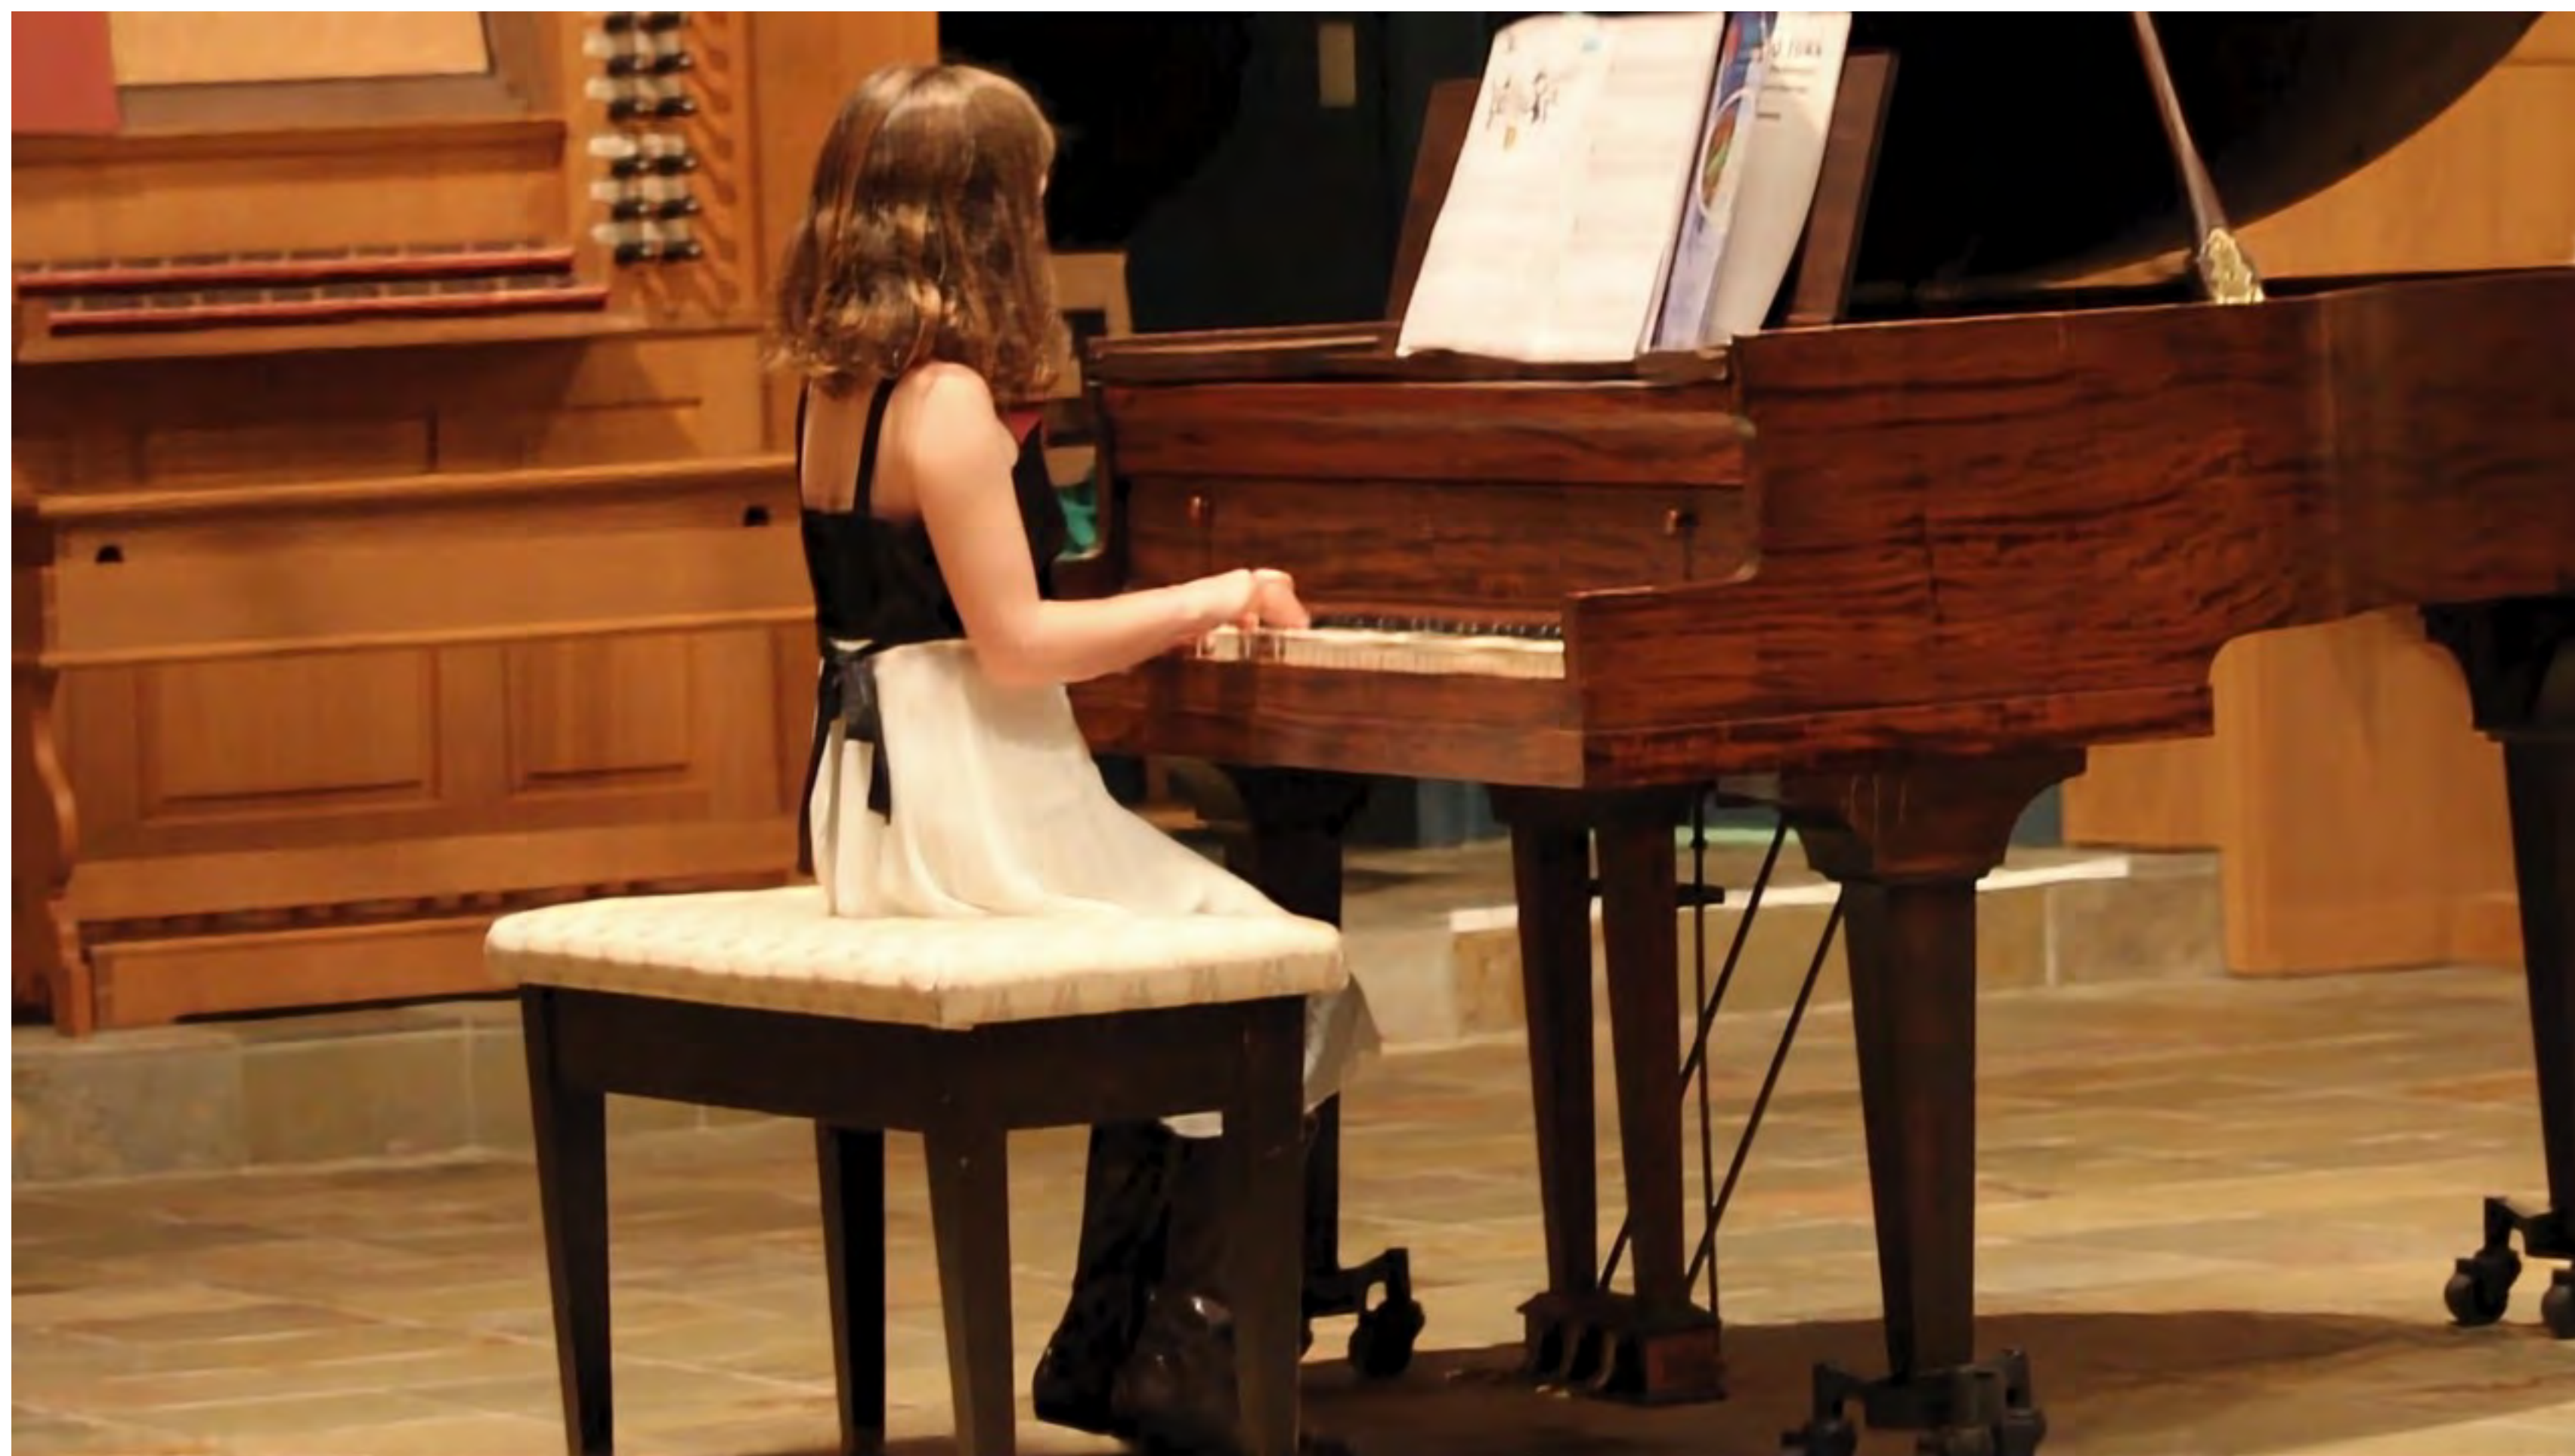

DBN+Flow



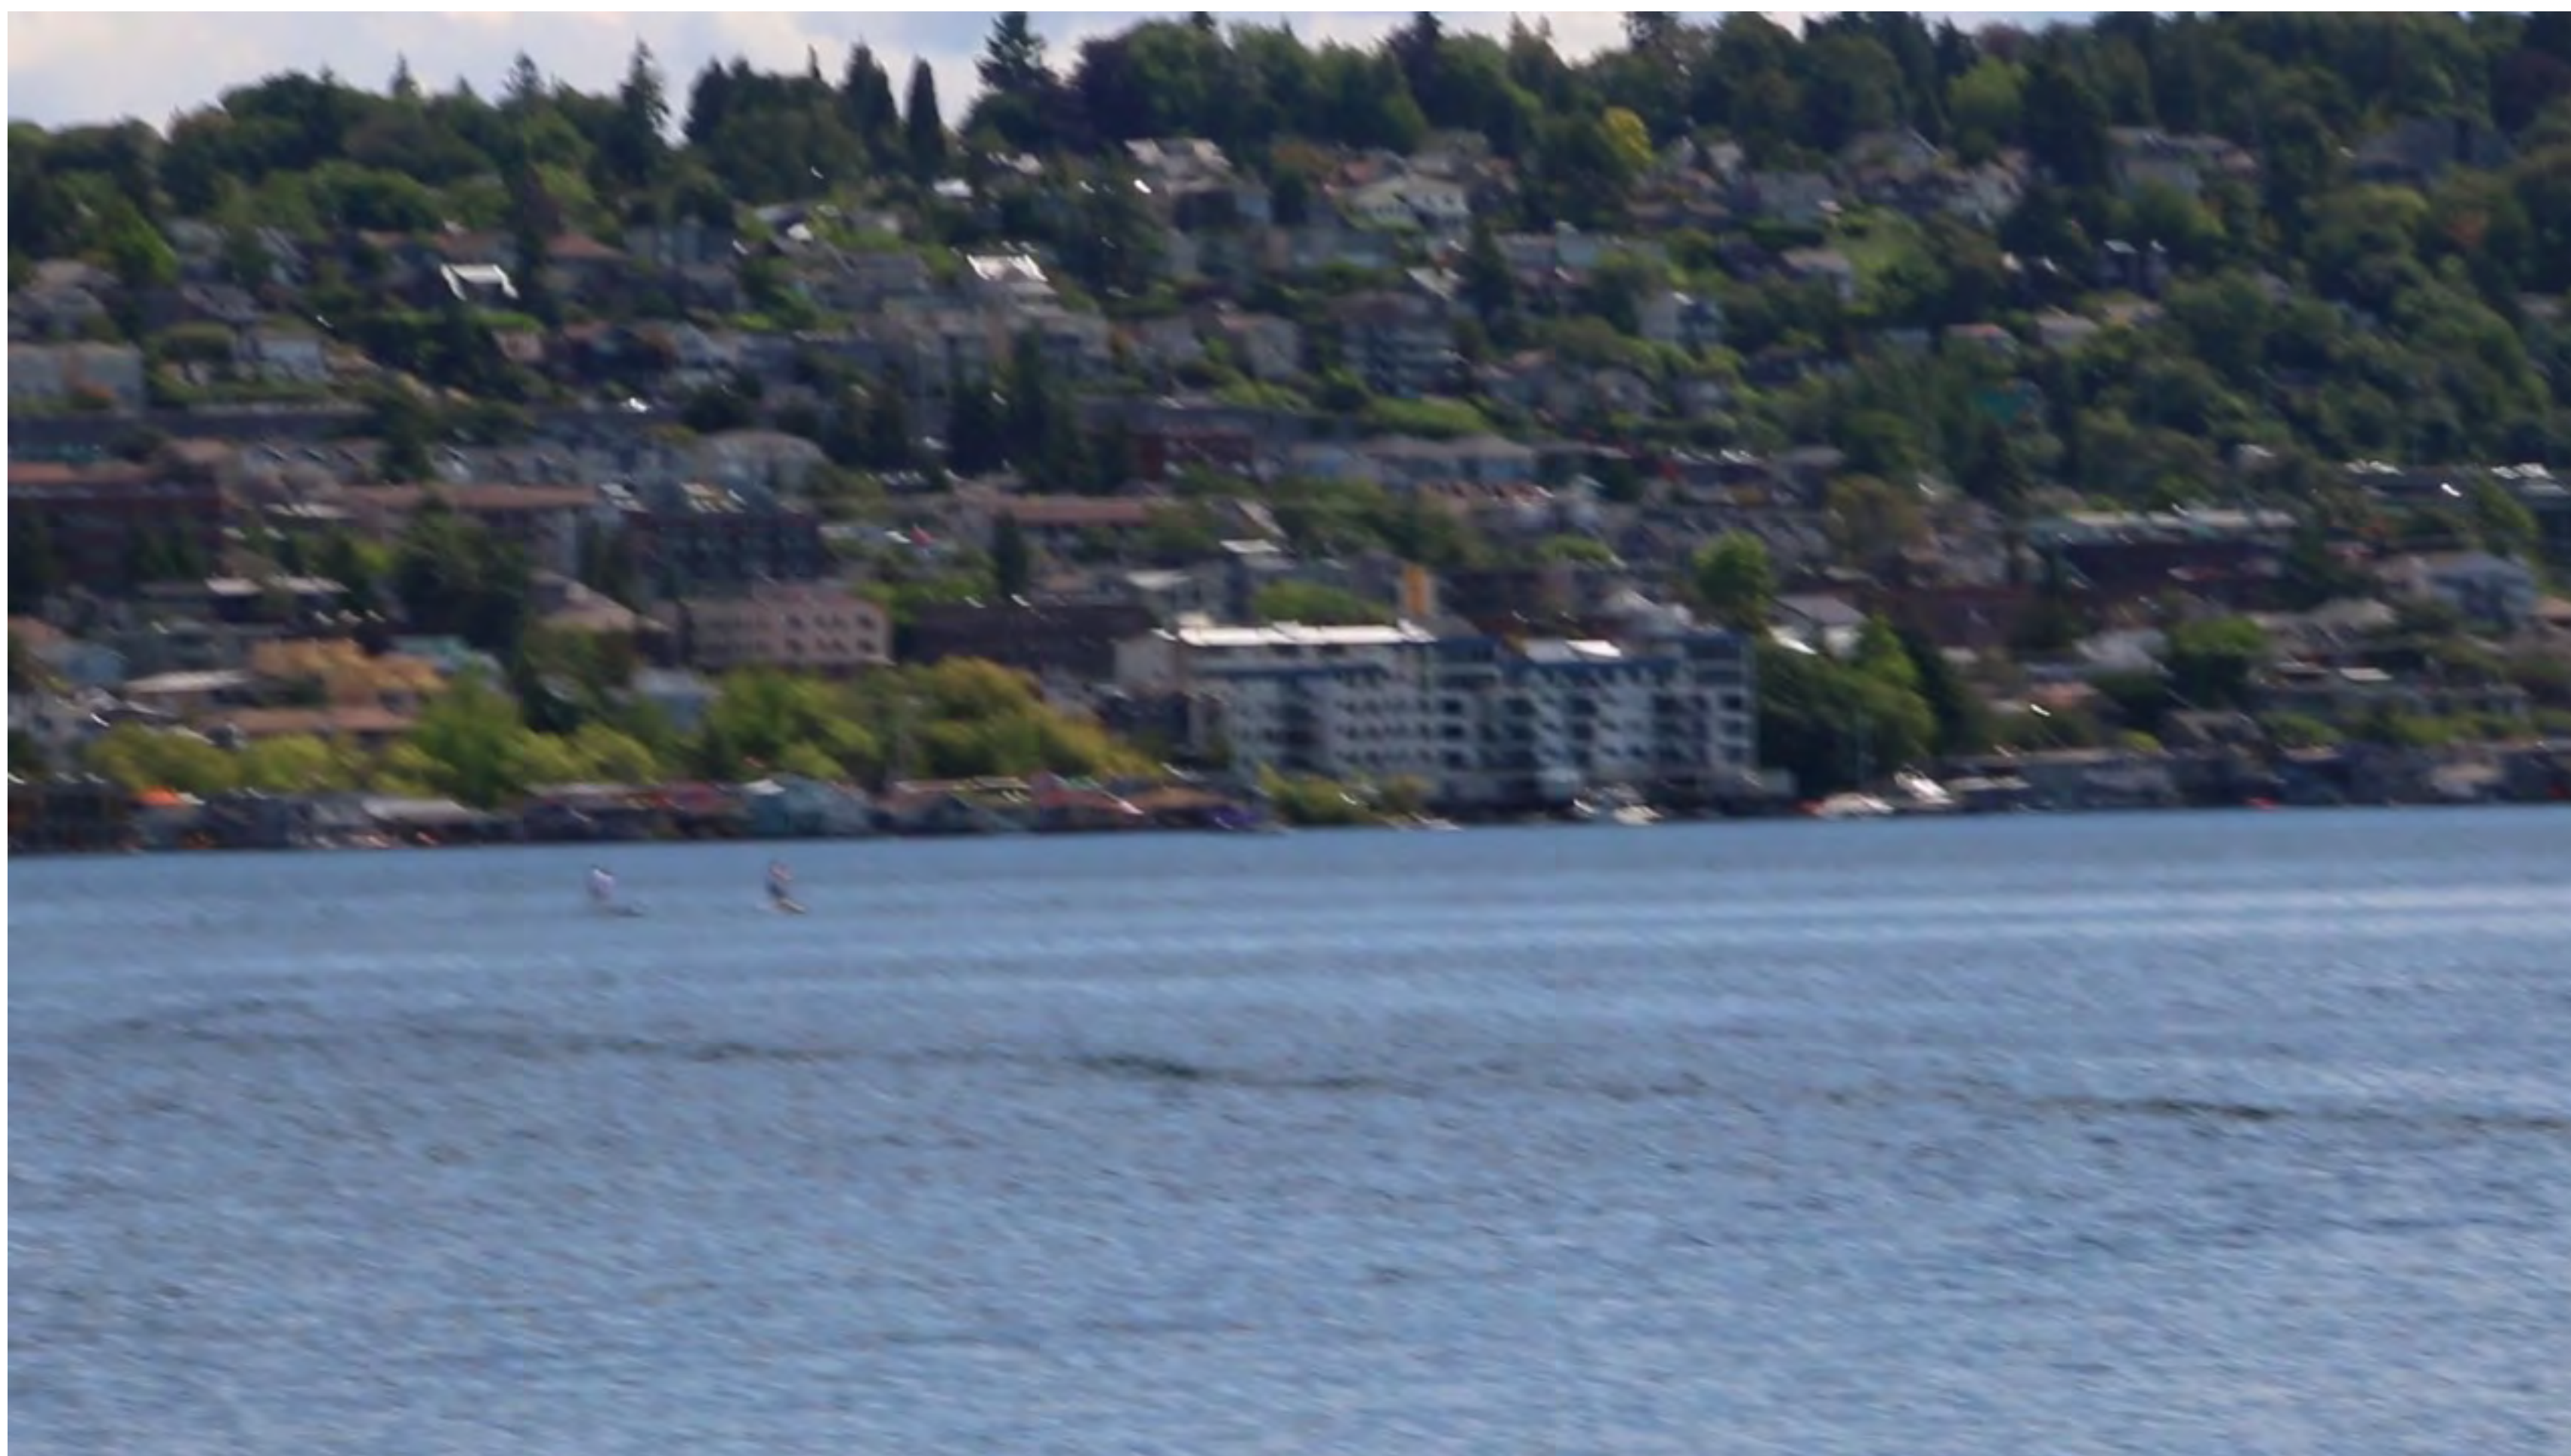

input



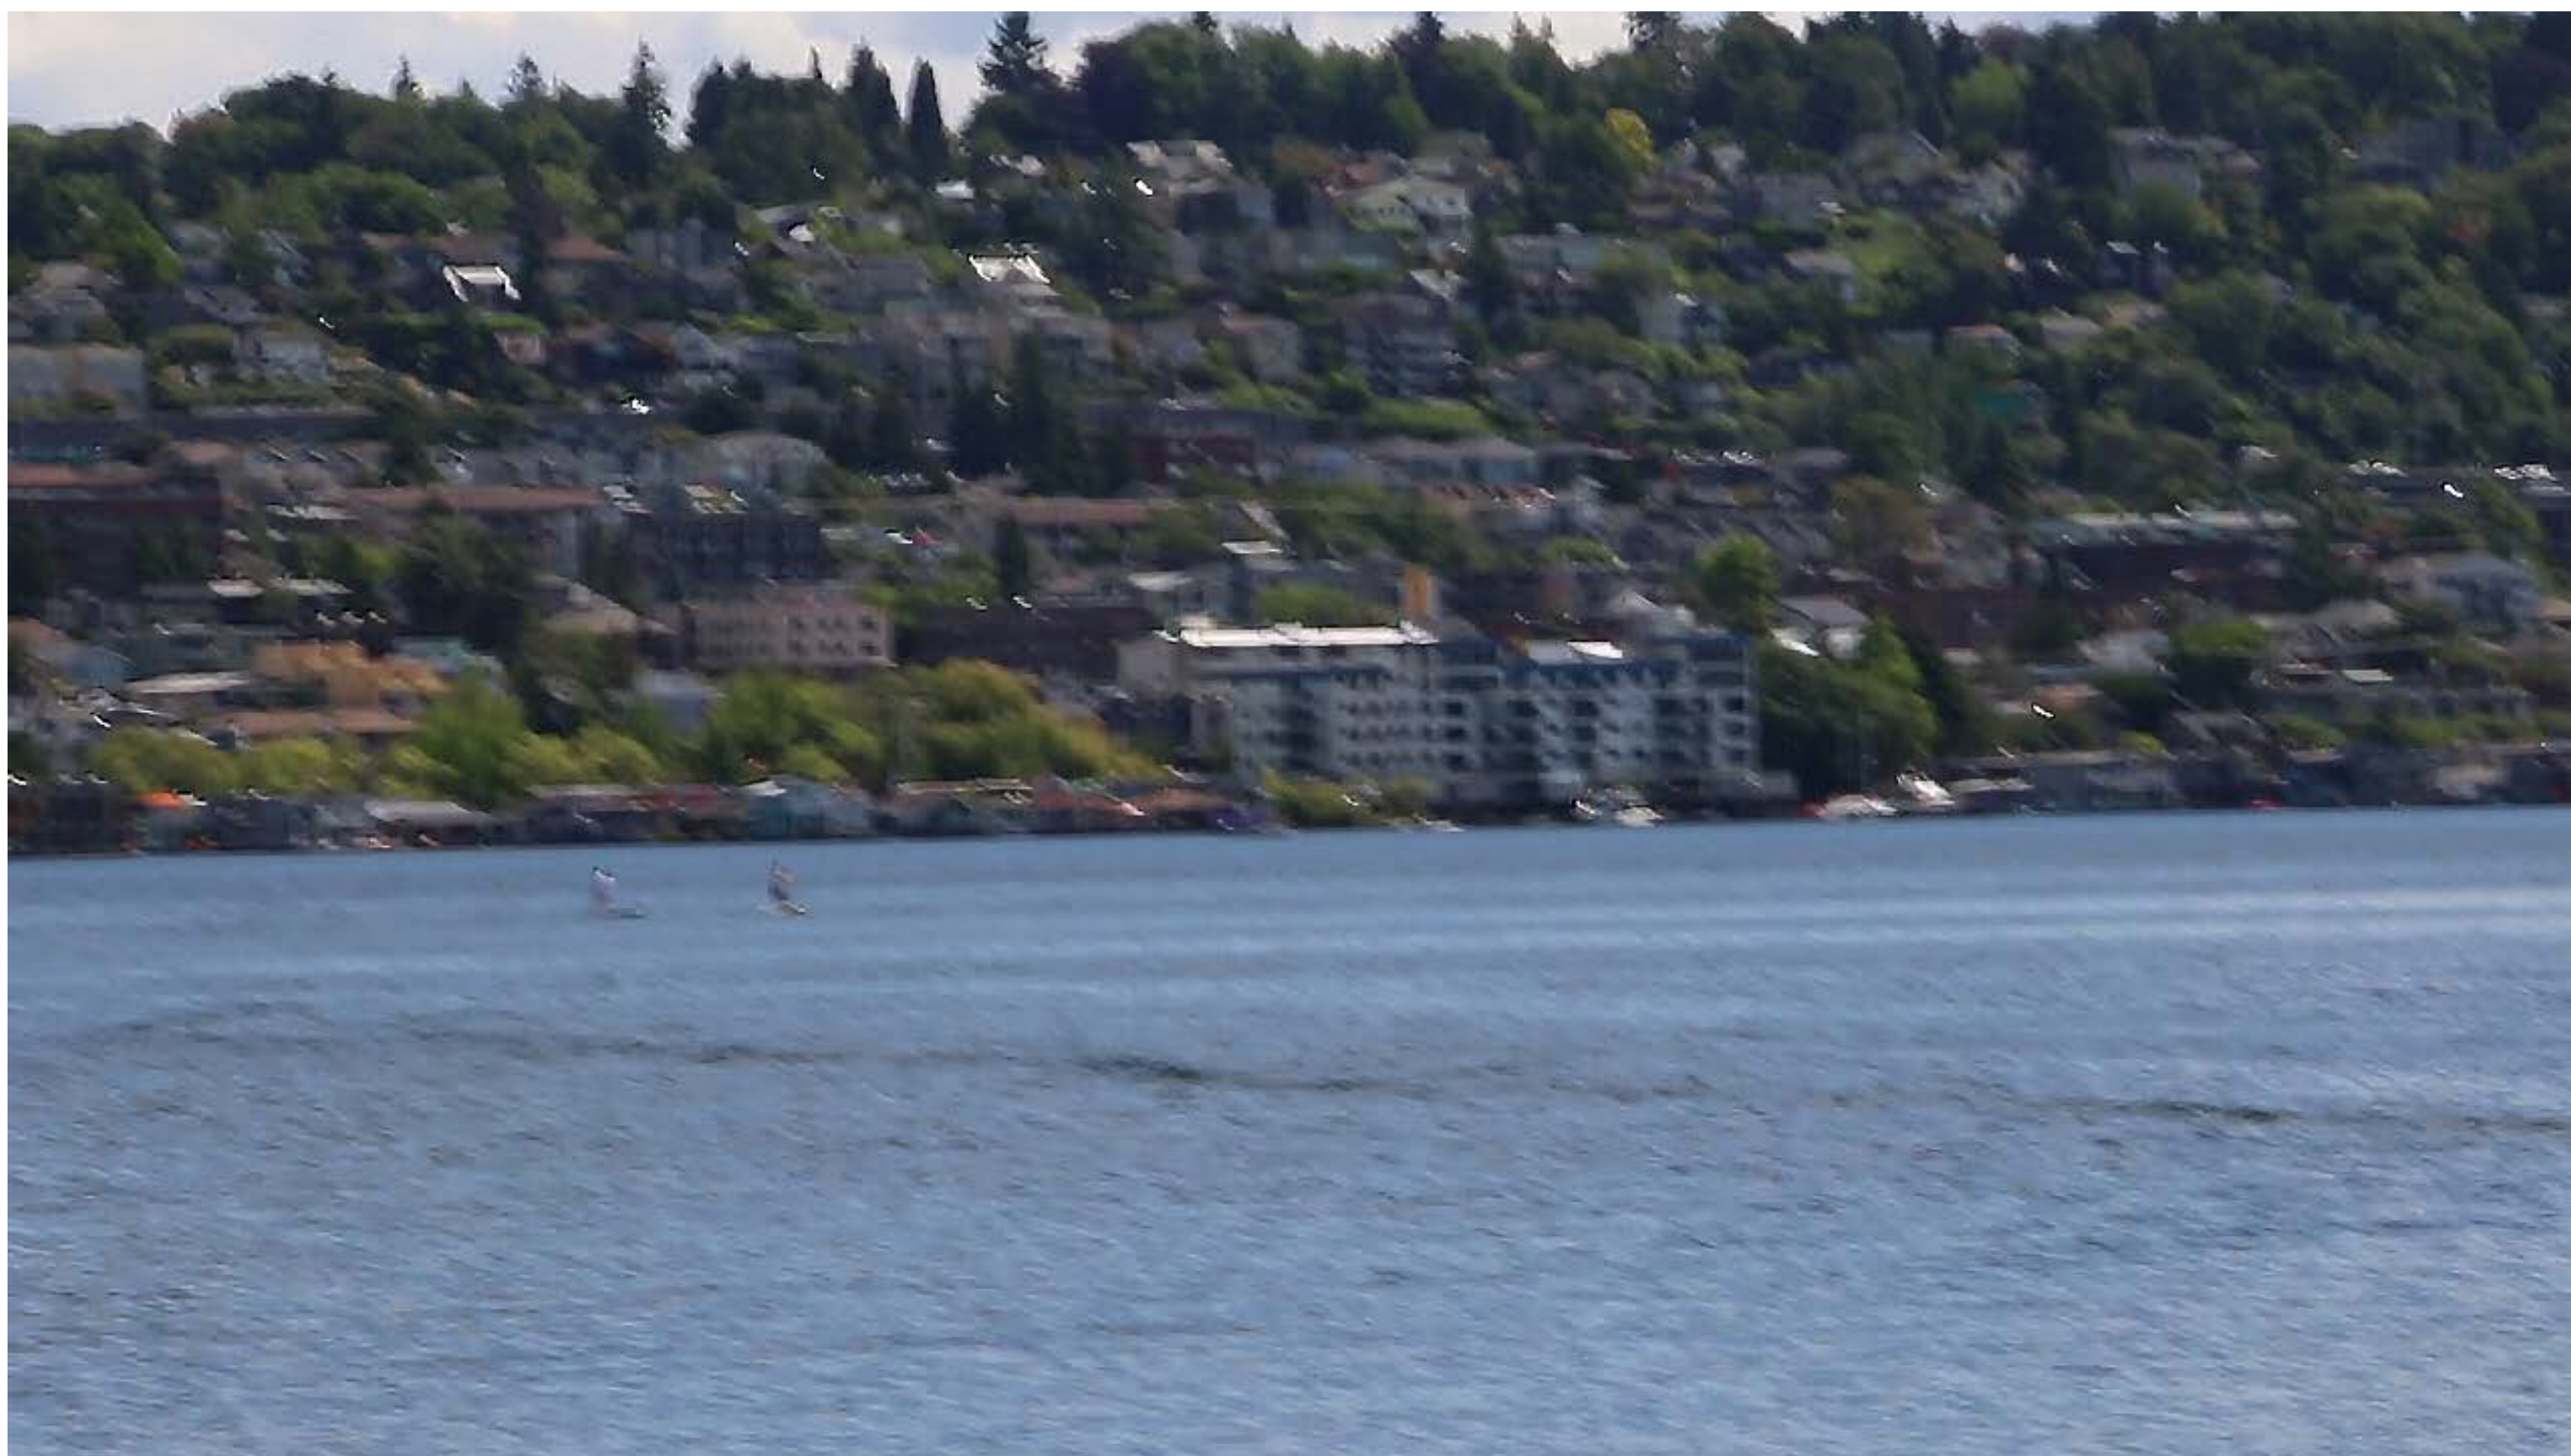

L0Deblur[48]



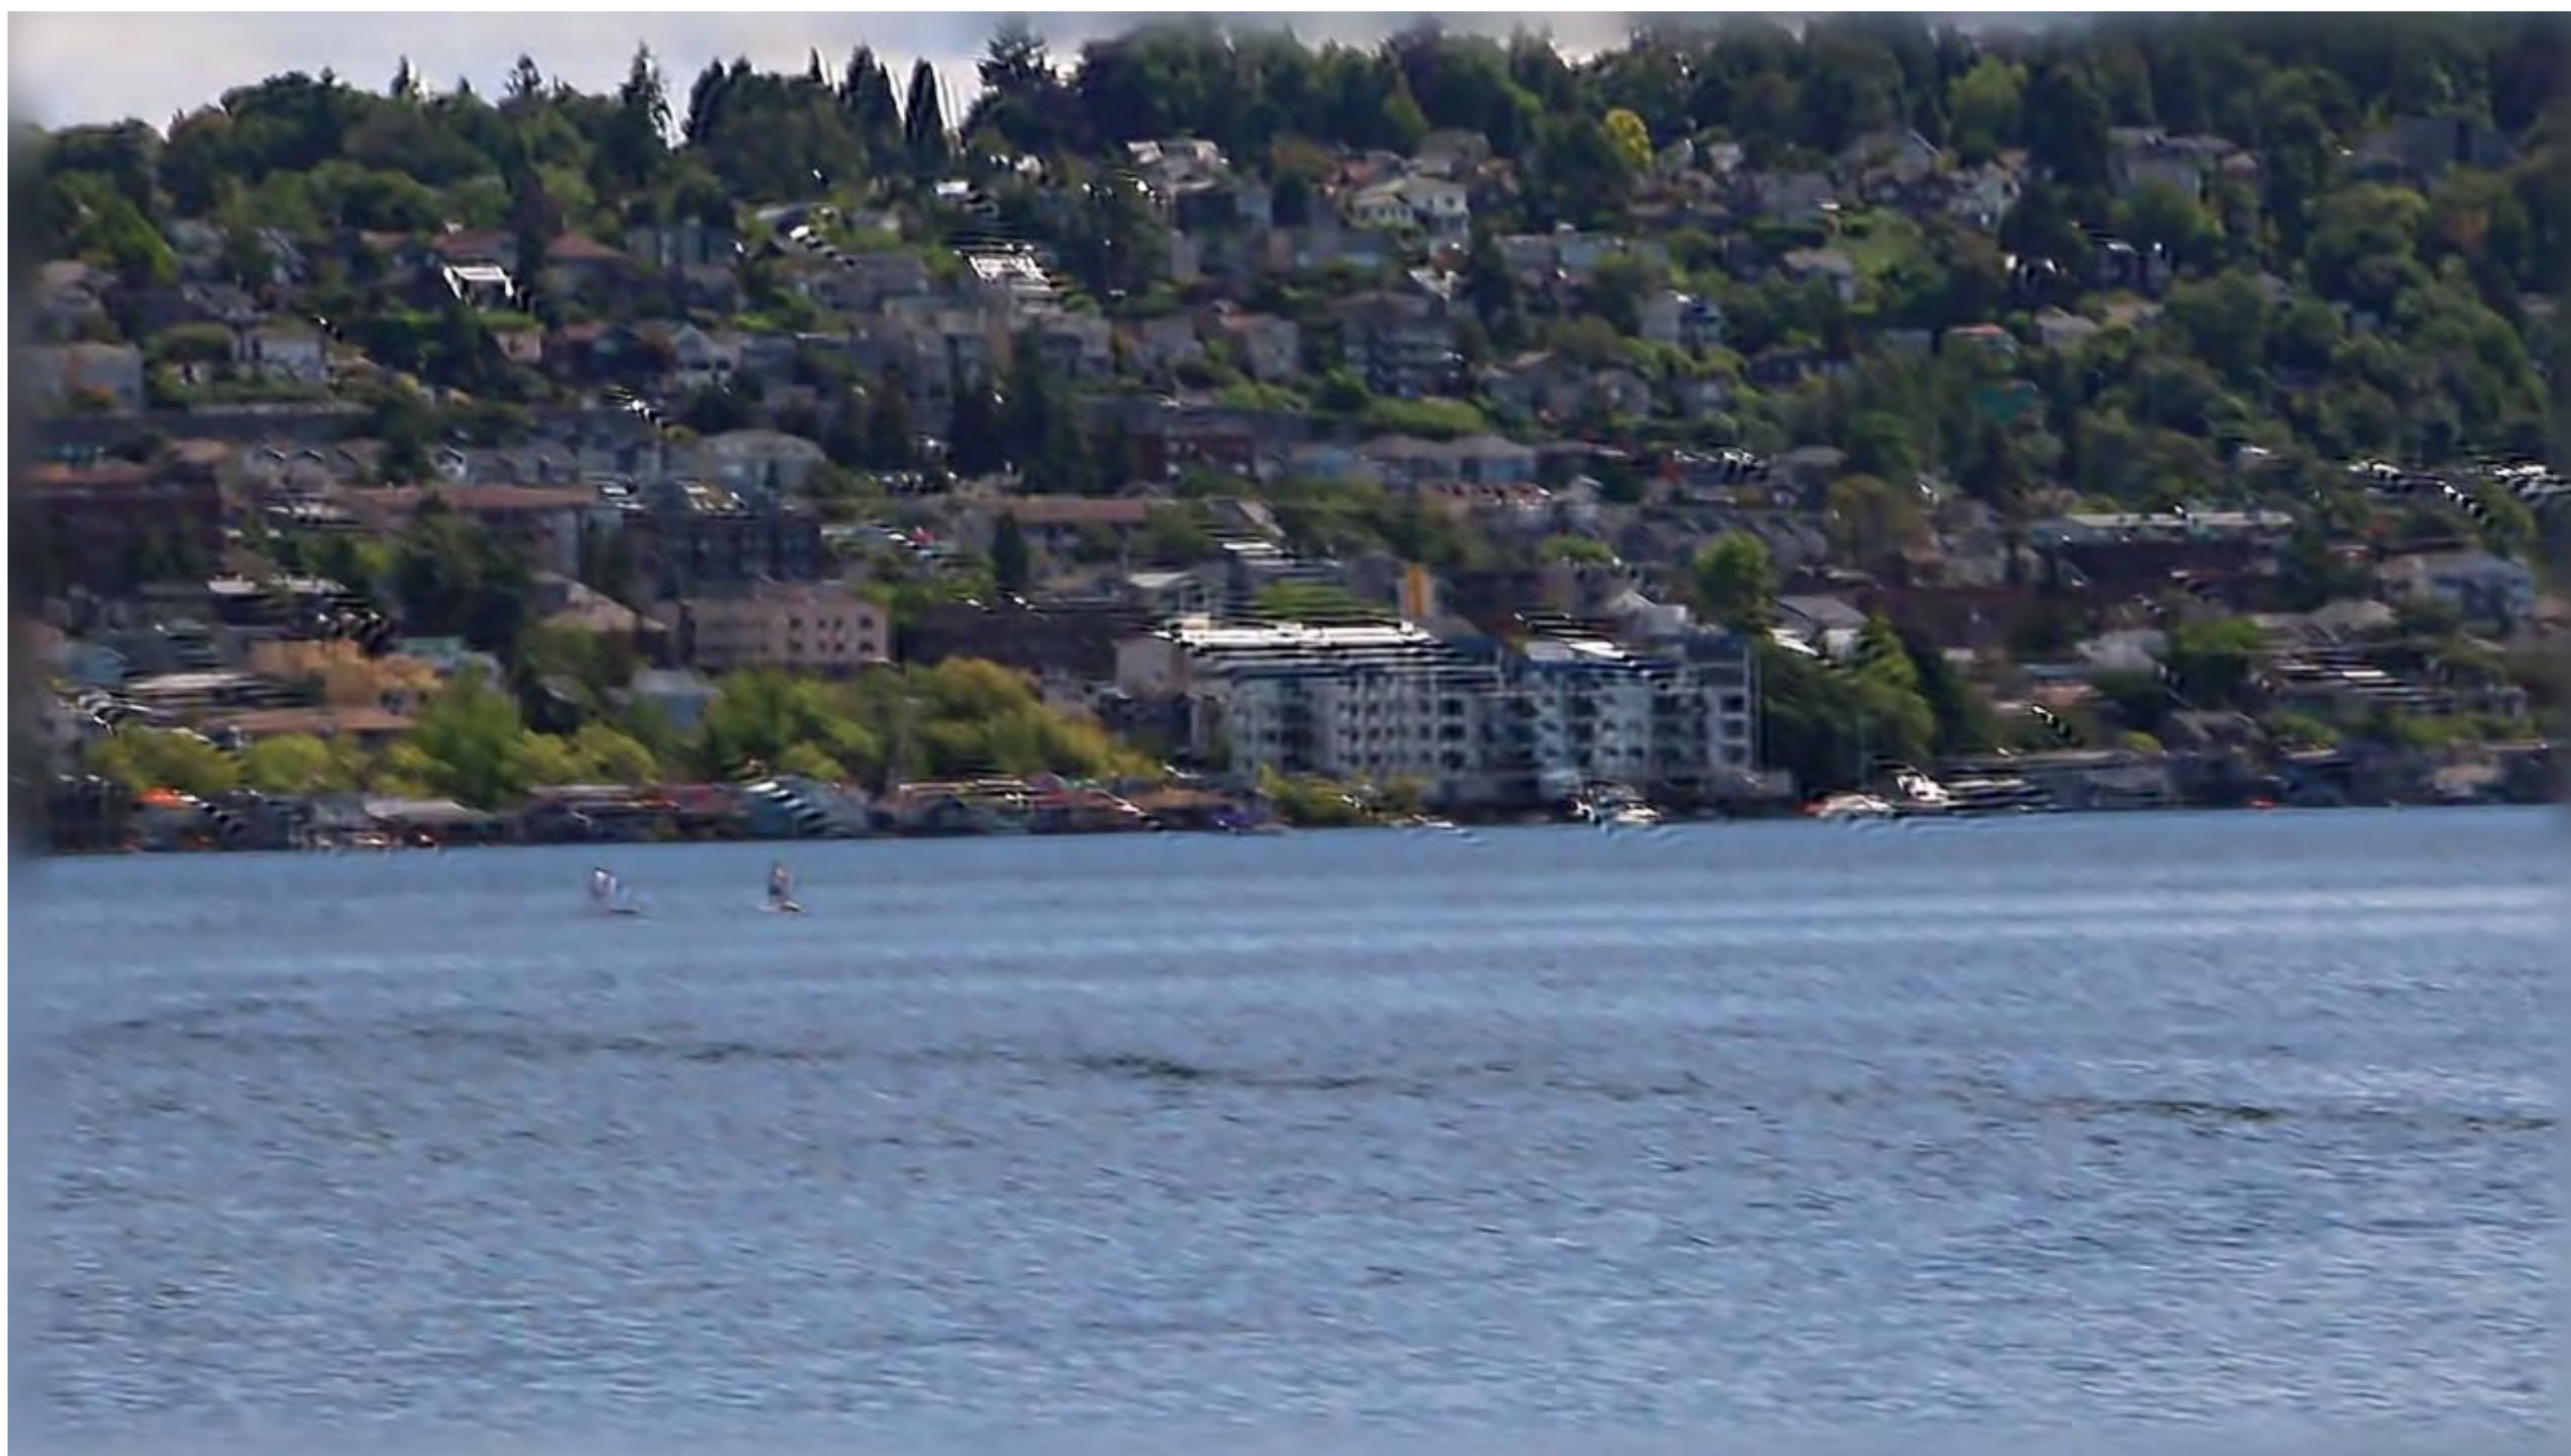

Neural [1]



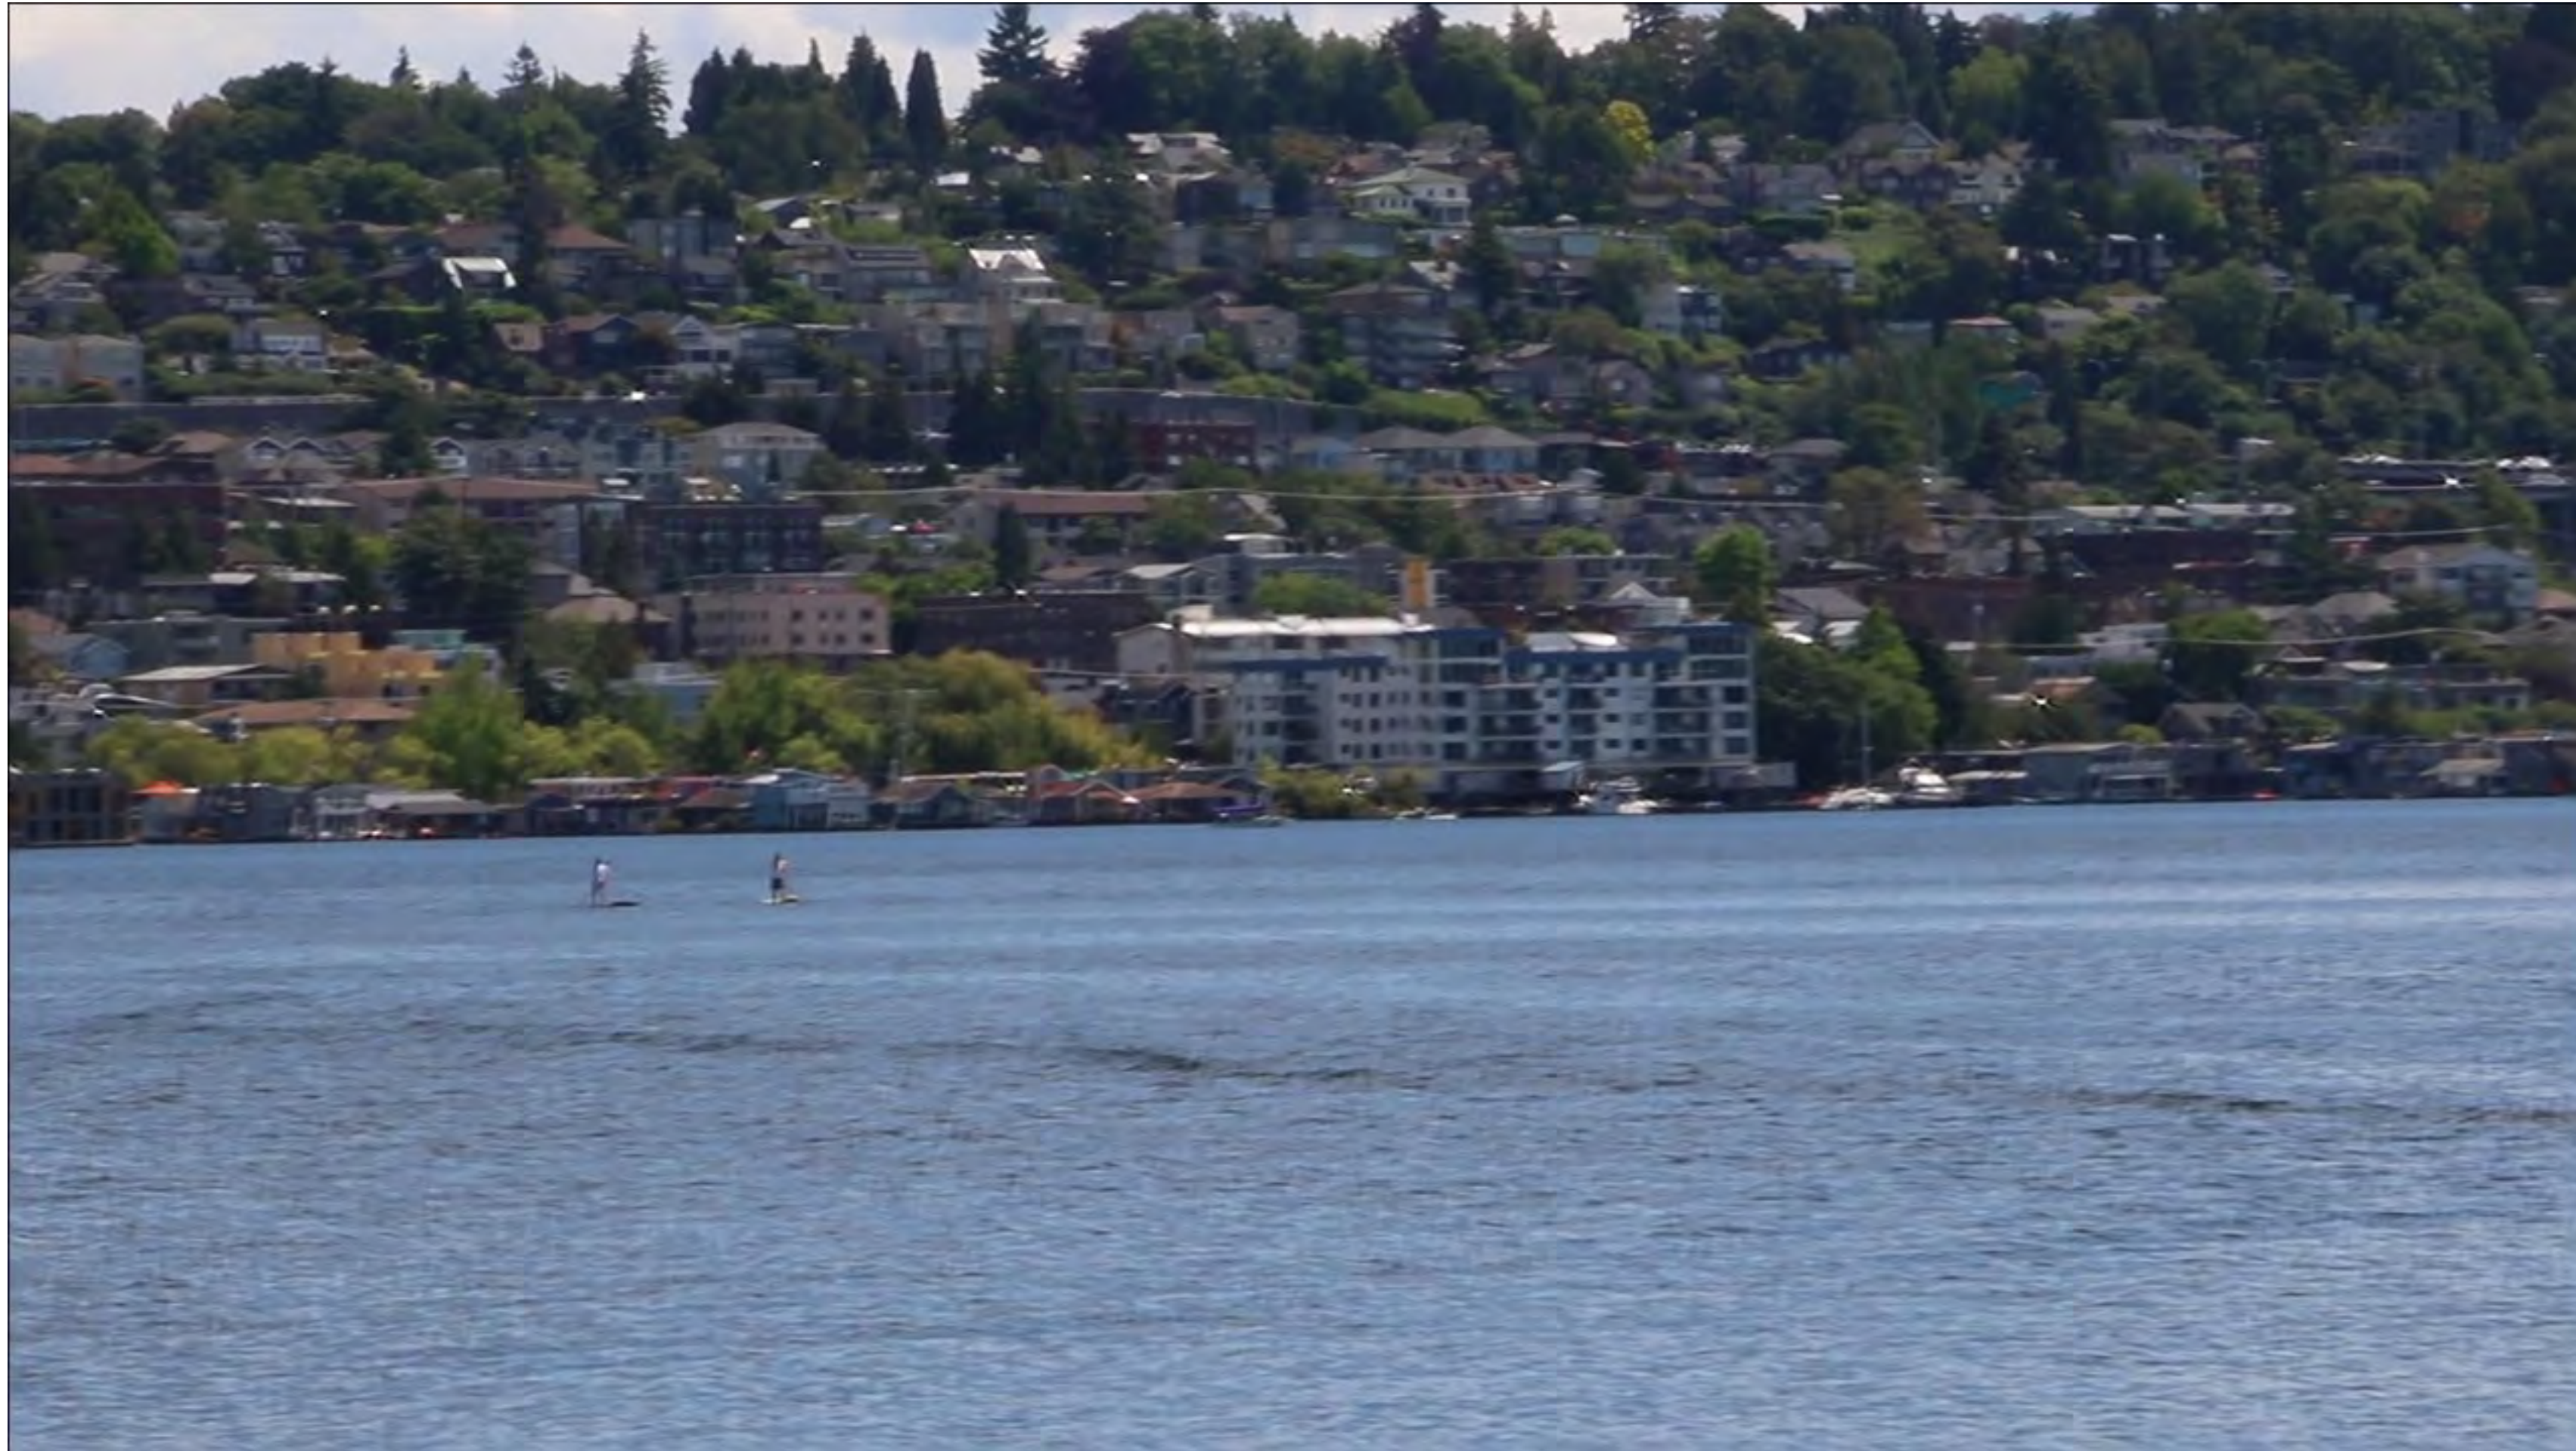

WFA [5]



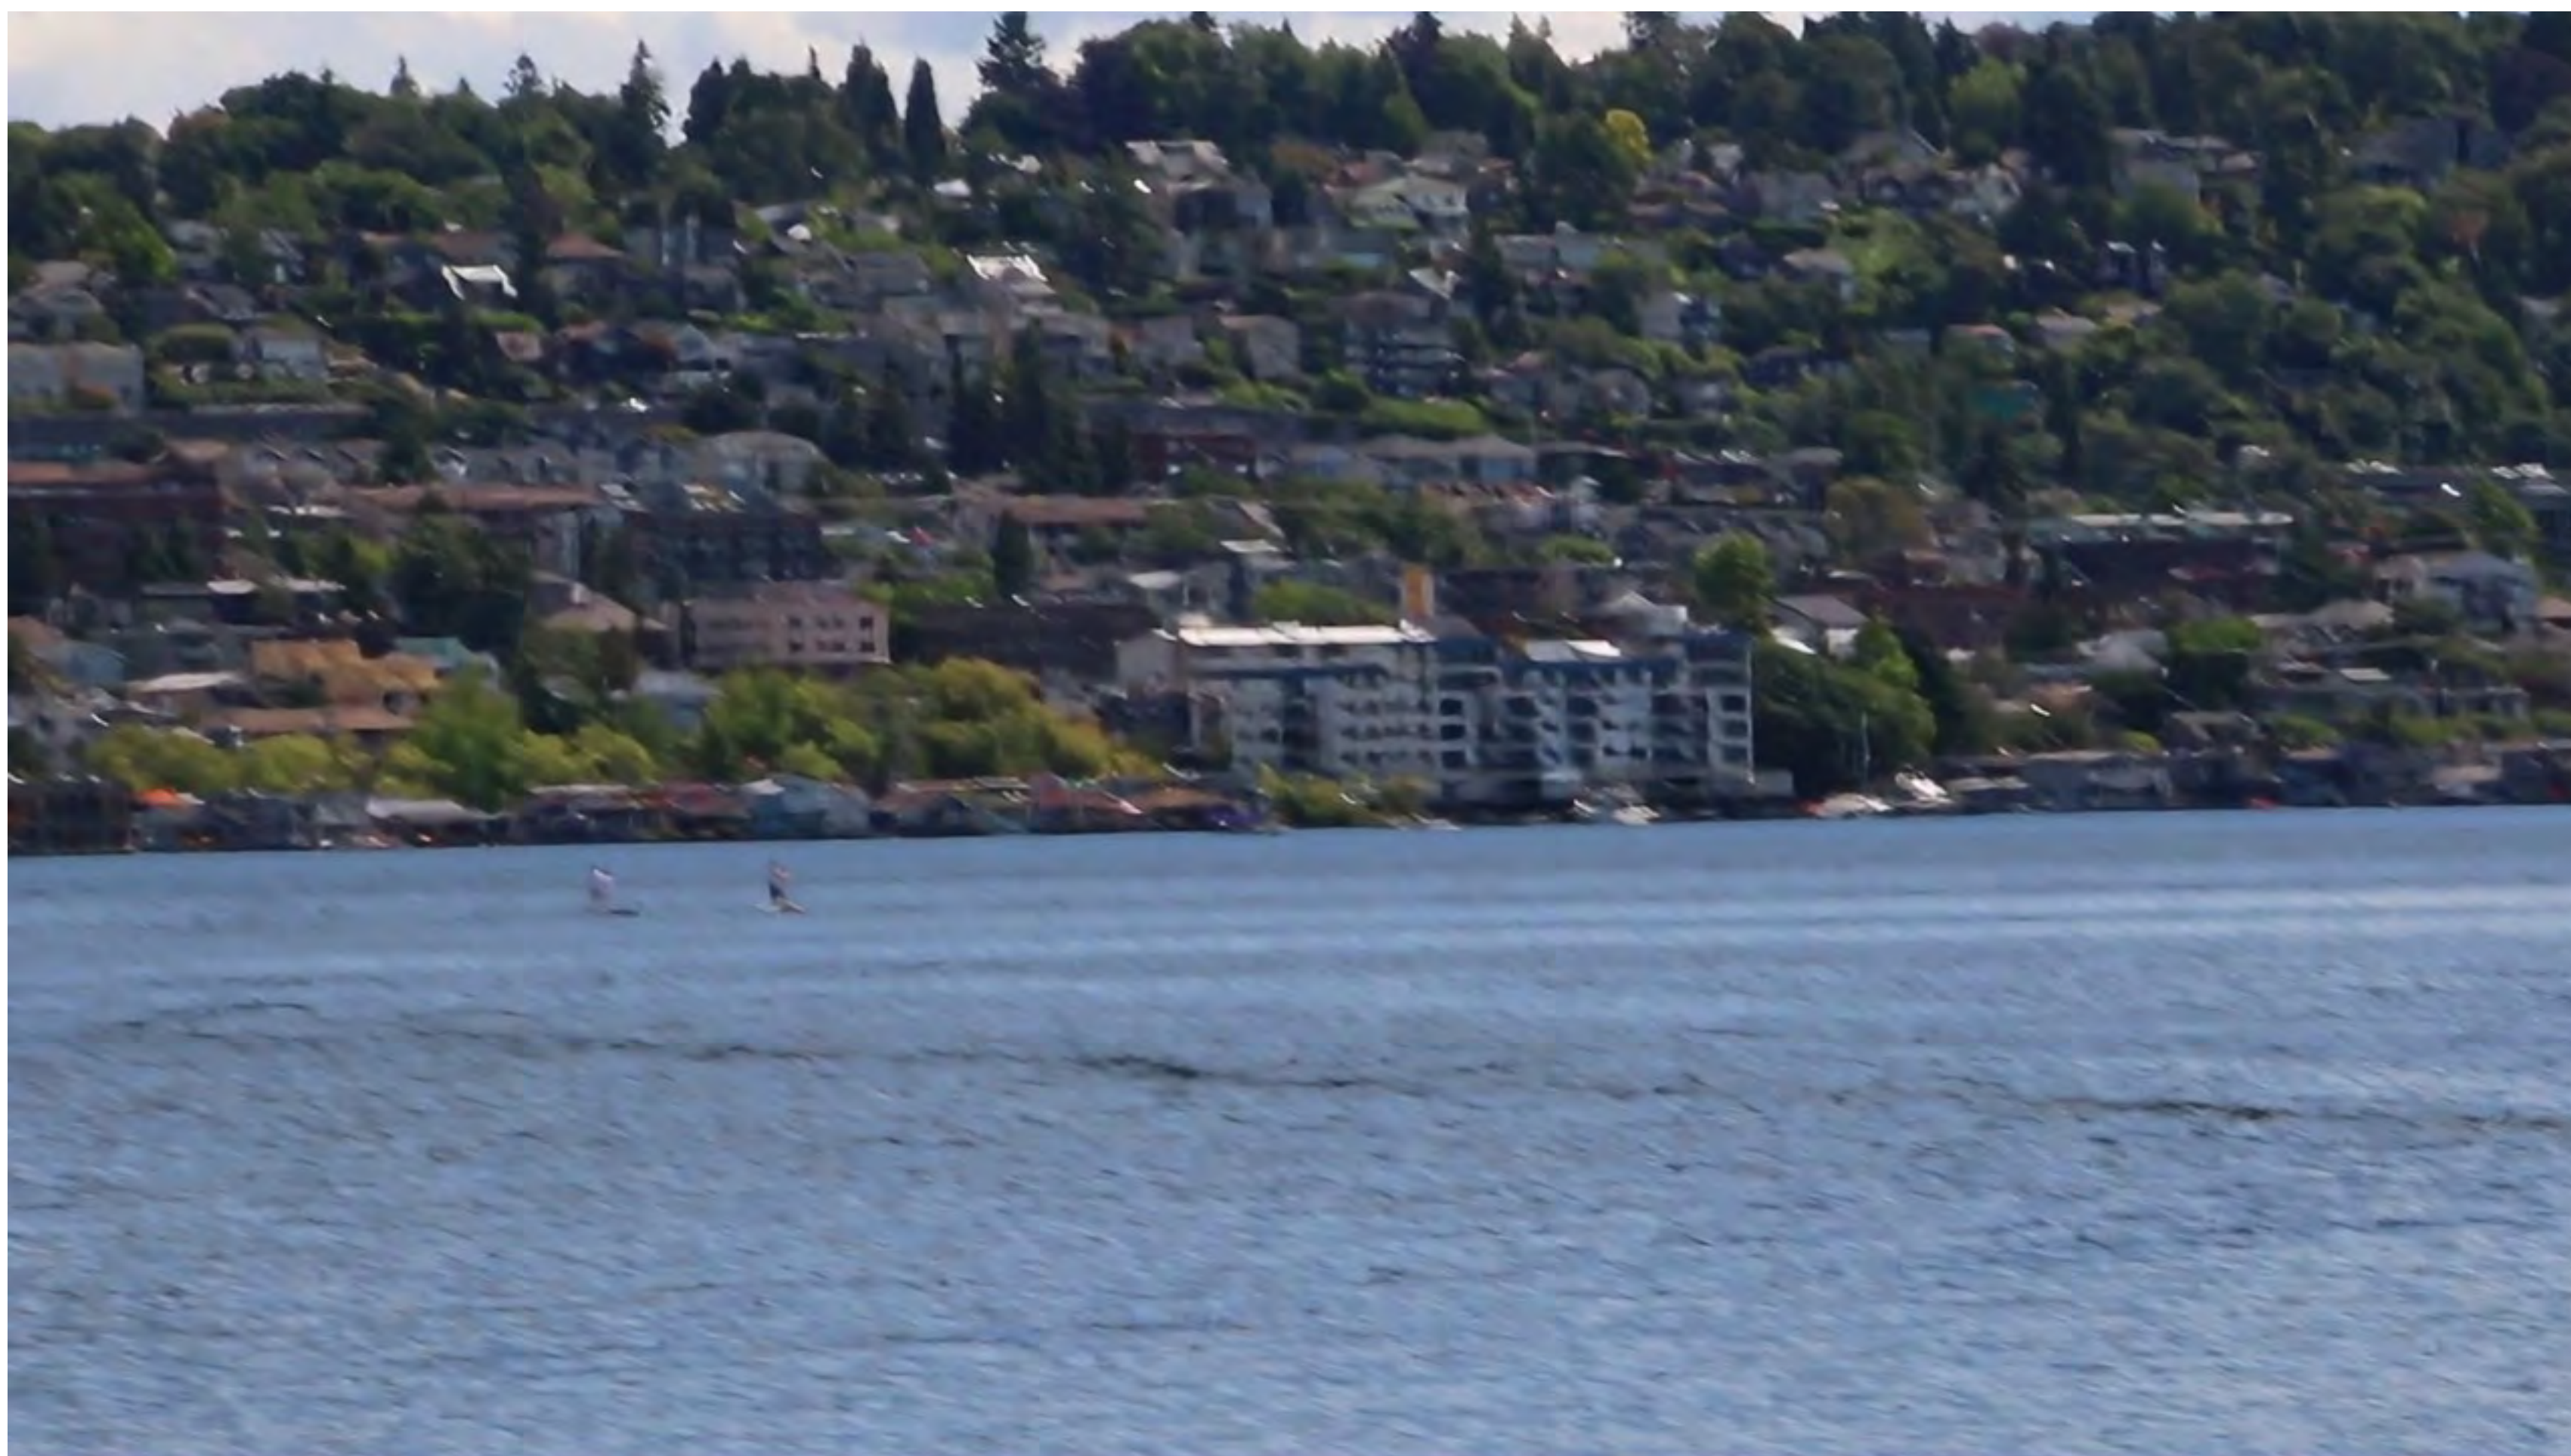

DBN+Single



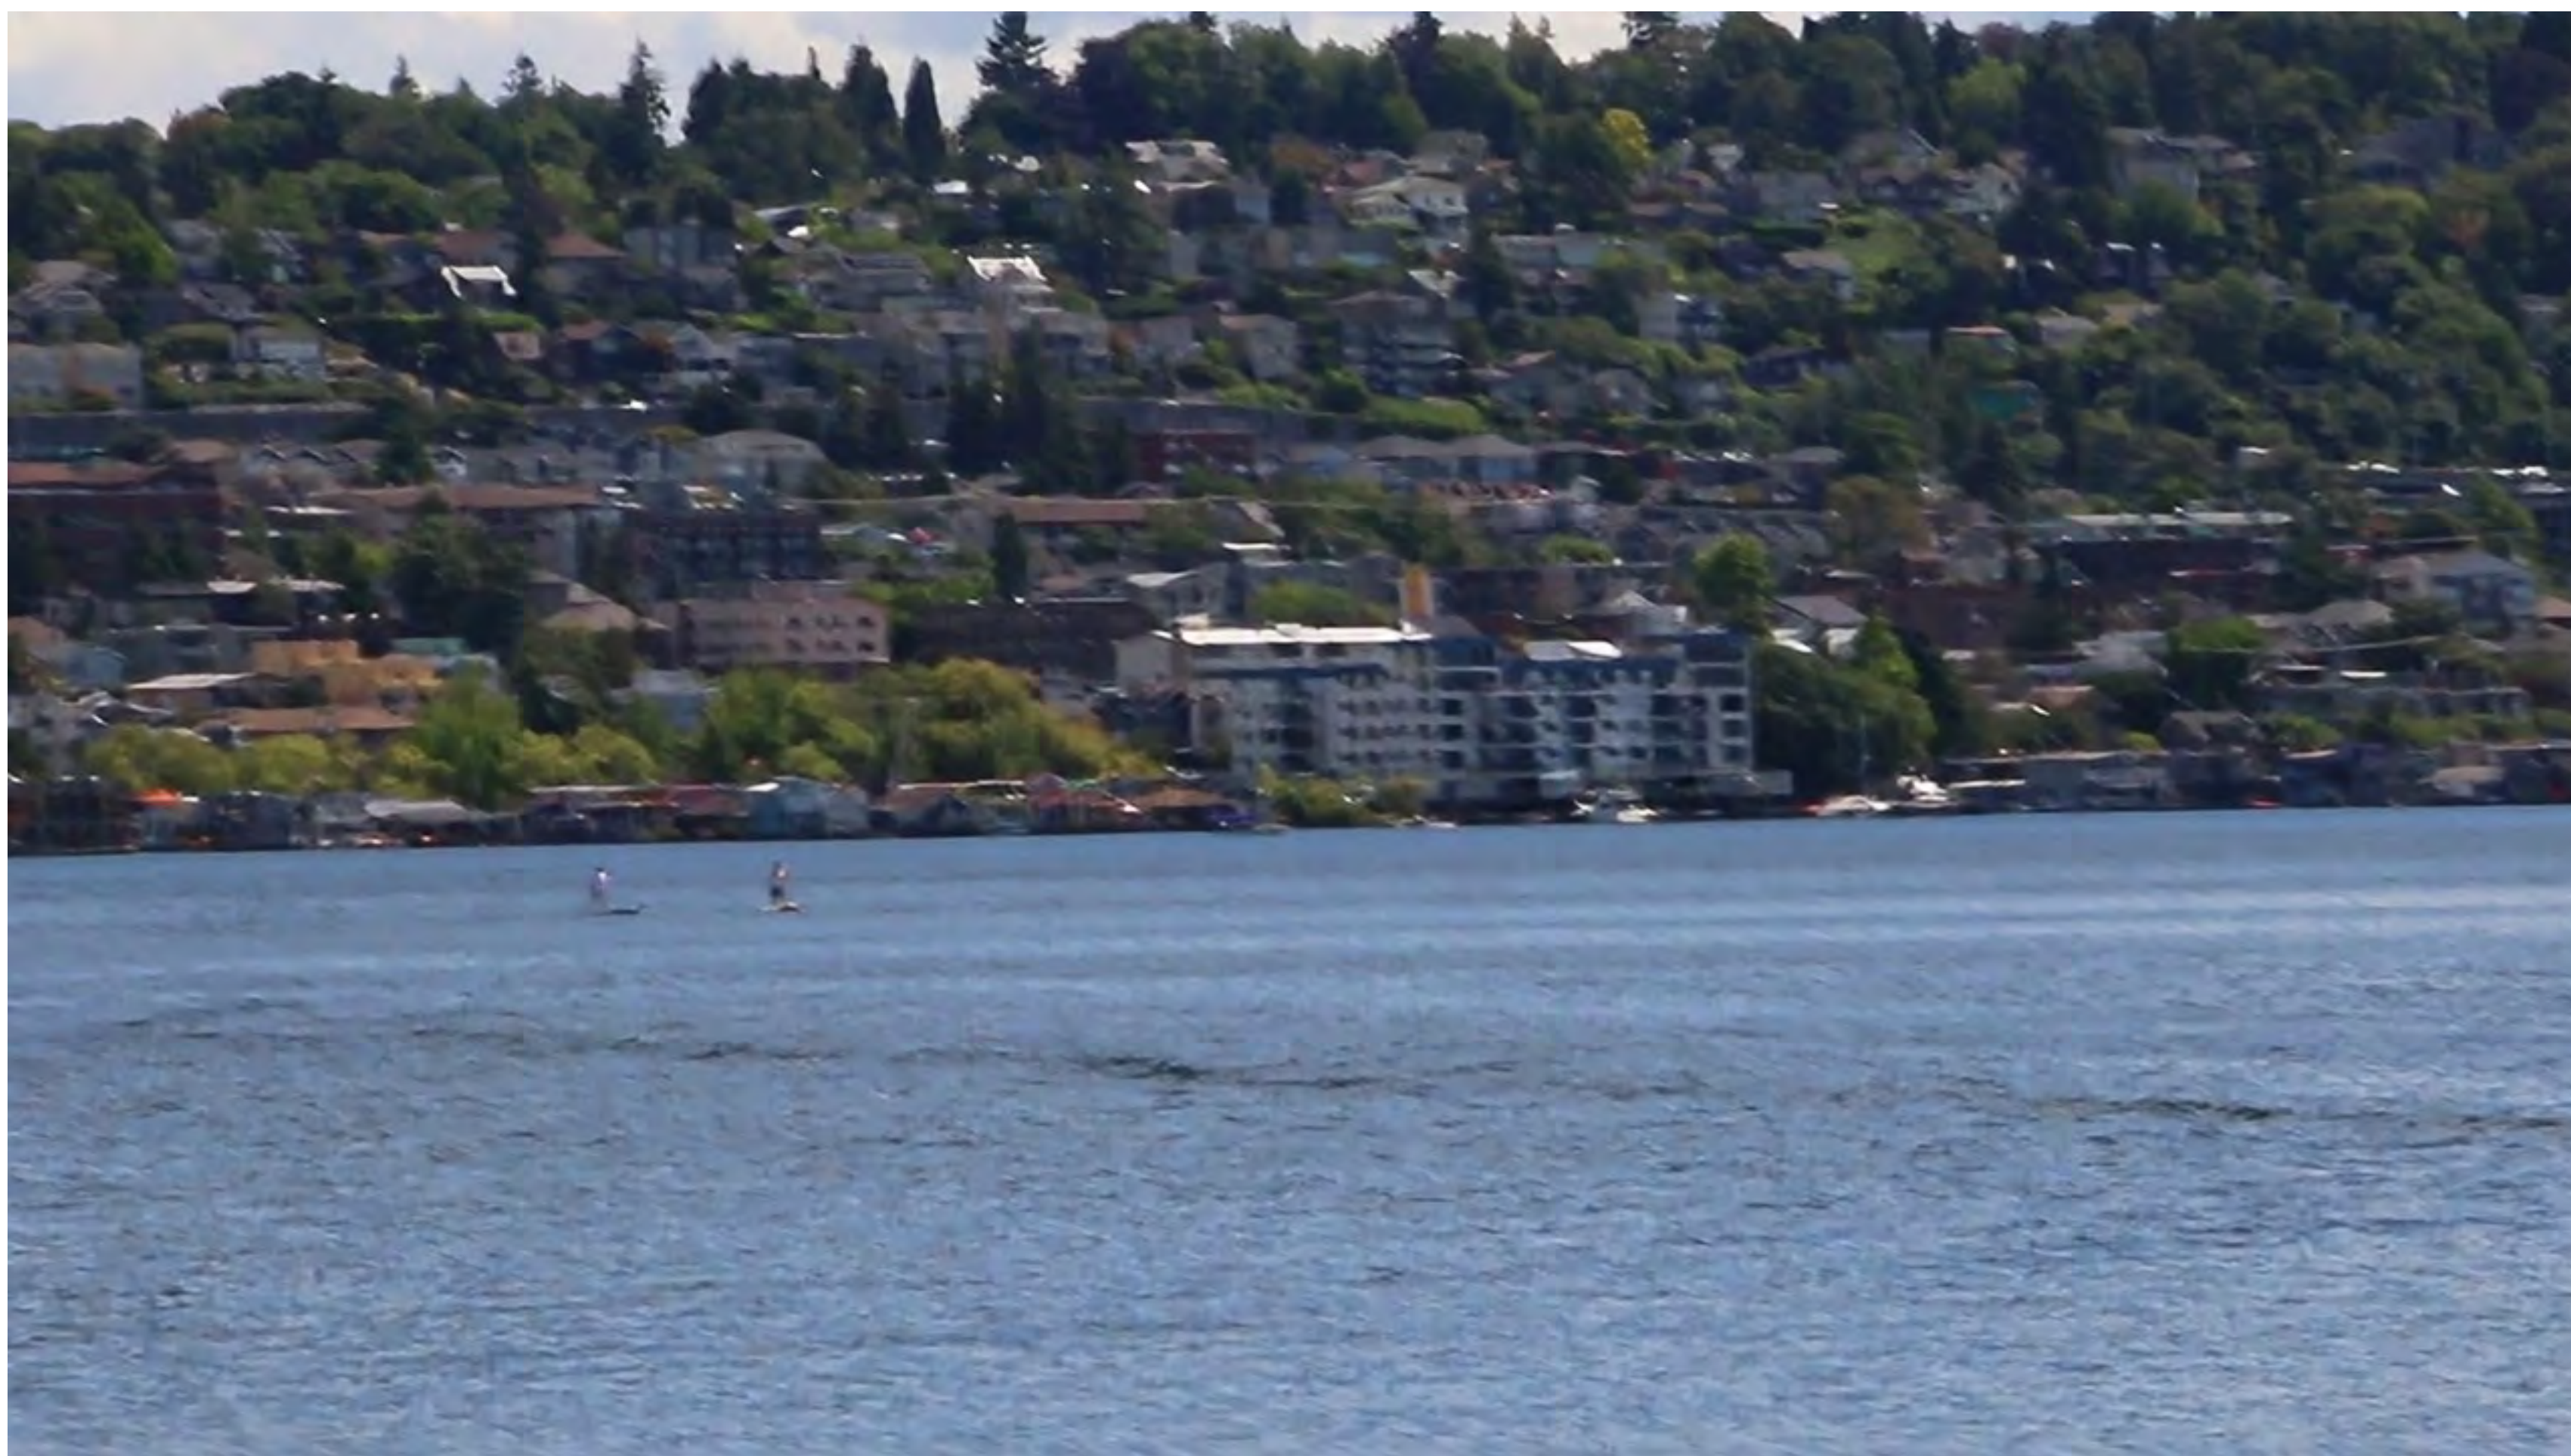

DBN+Noalign



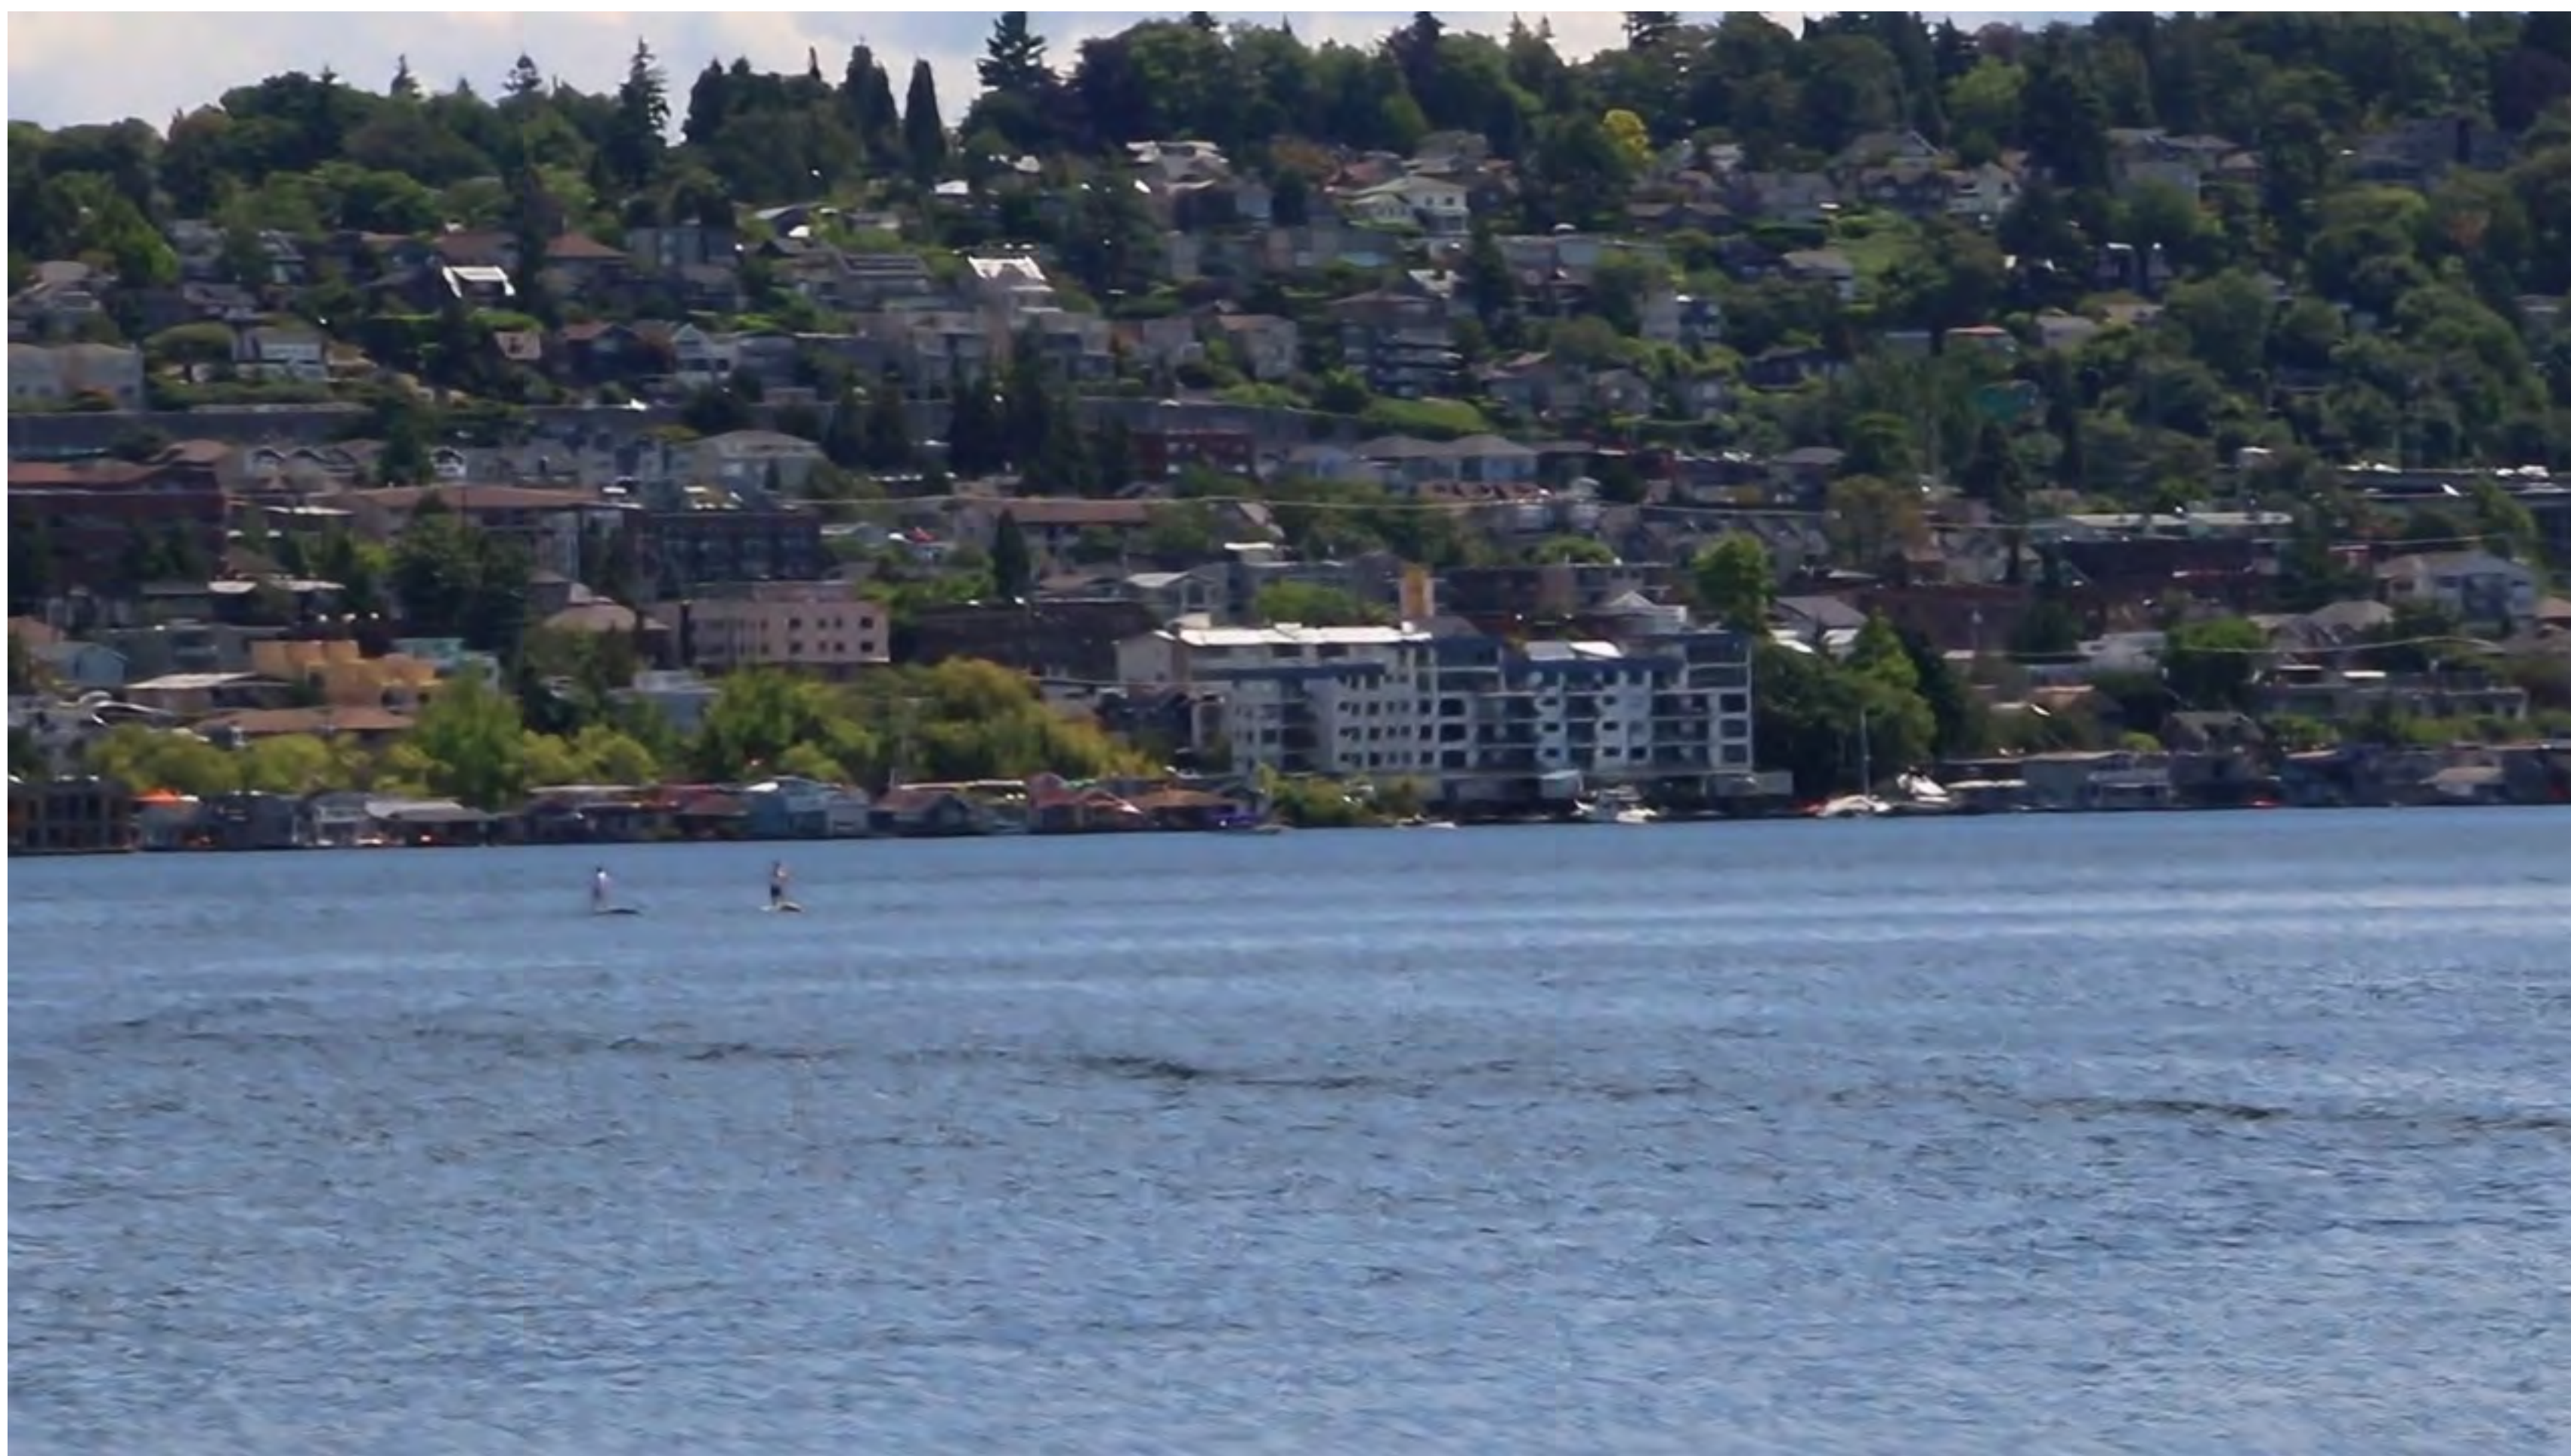

DBN+Homog



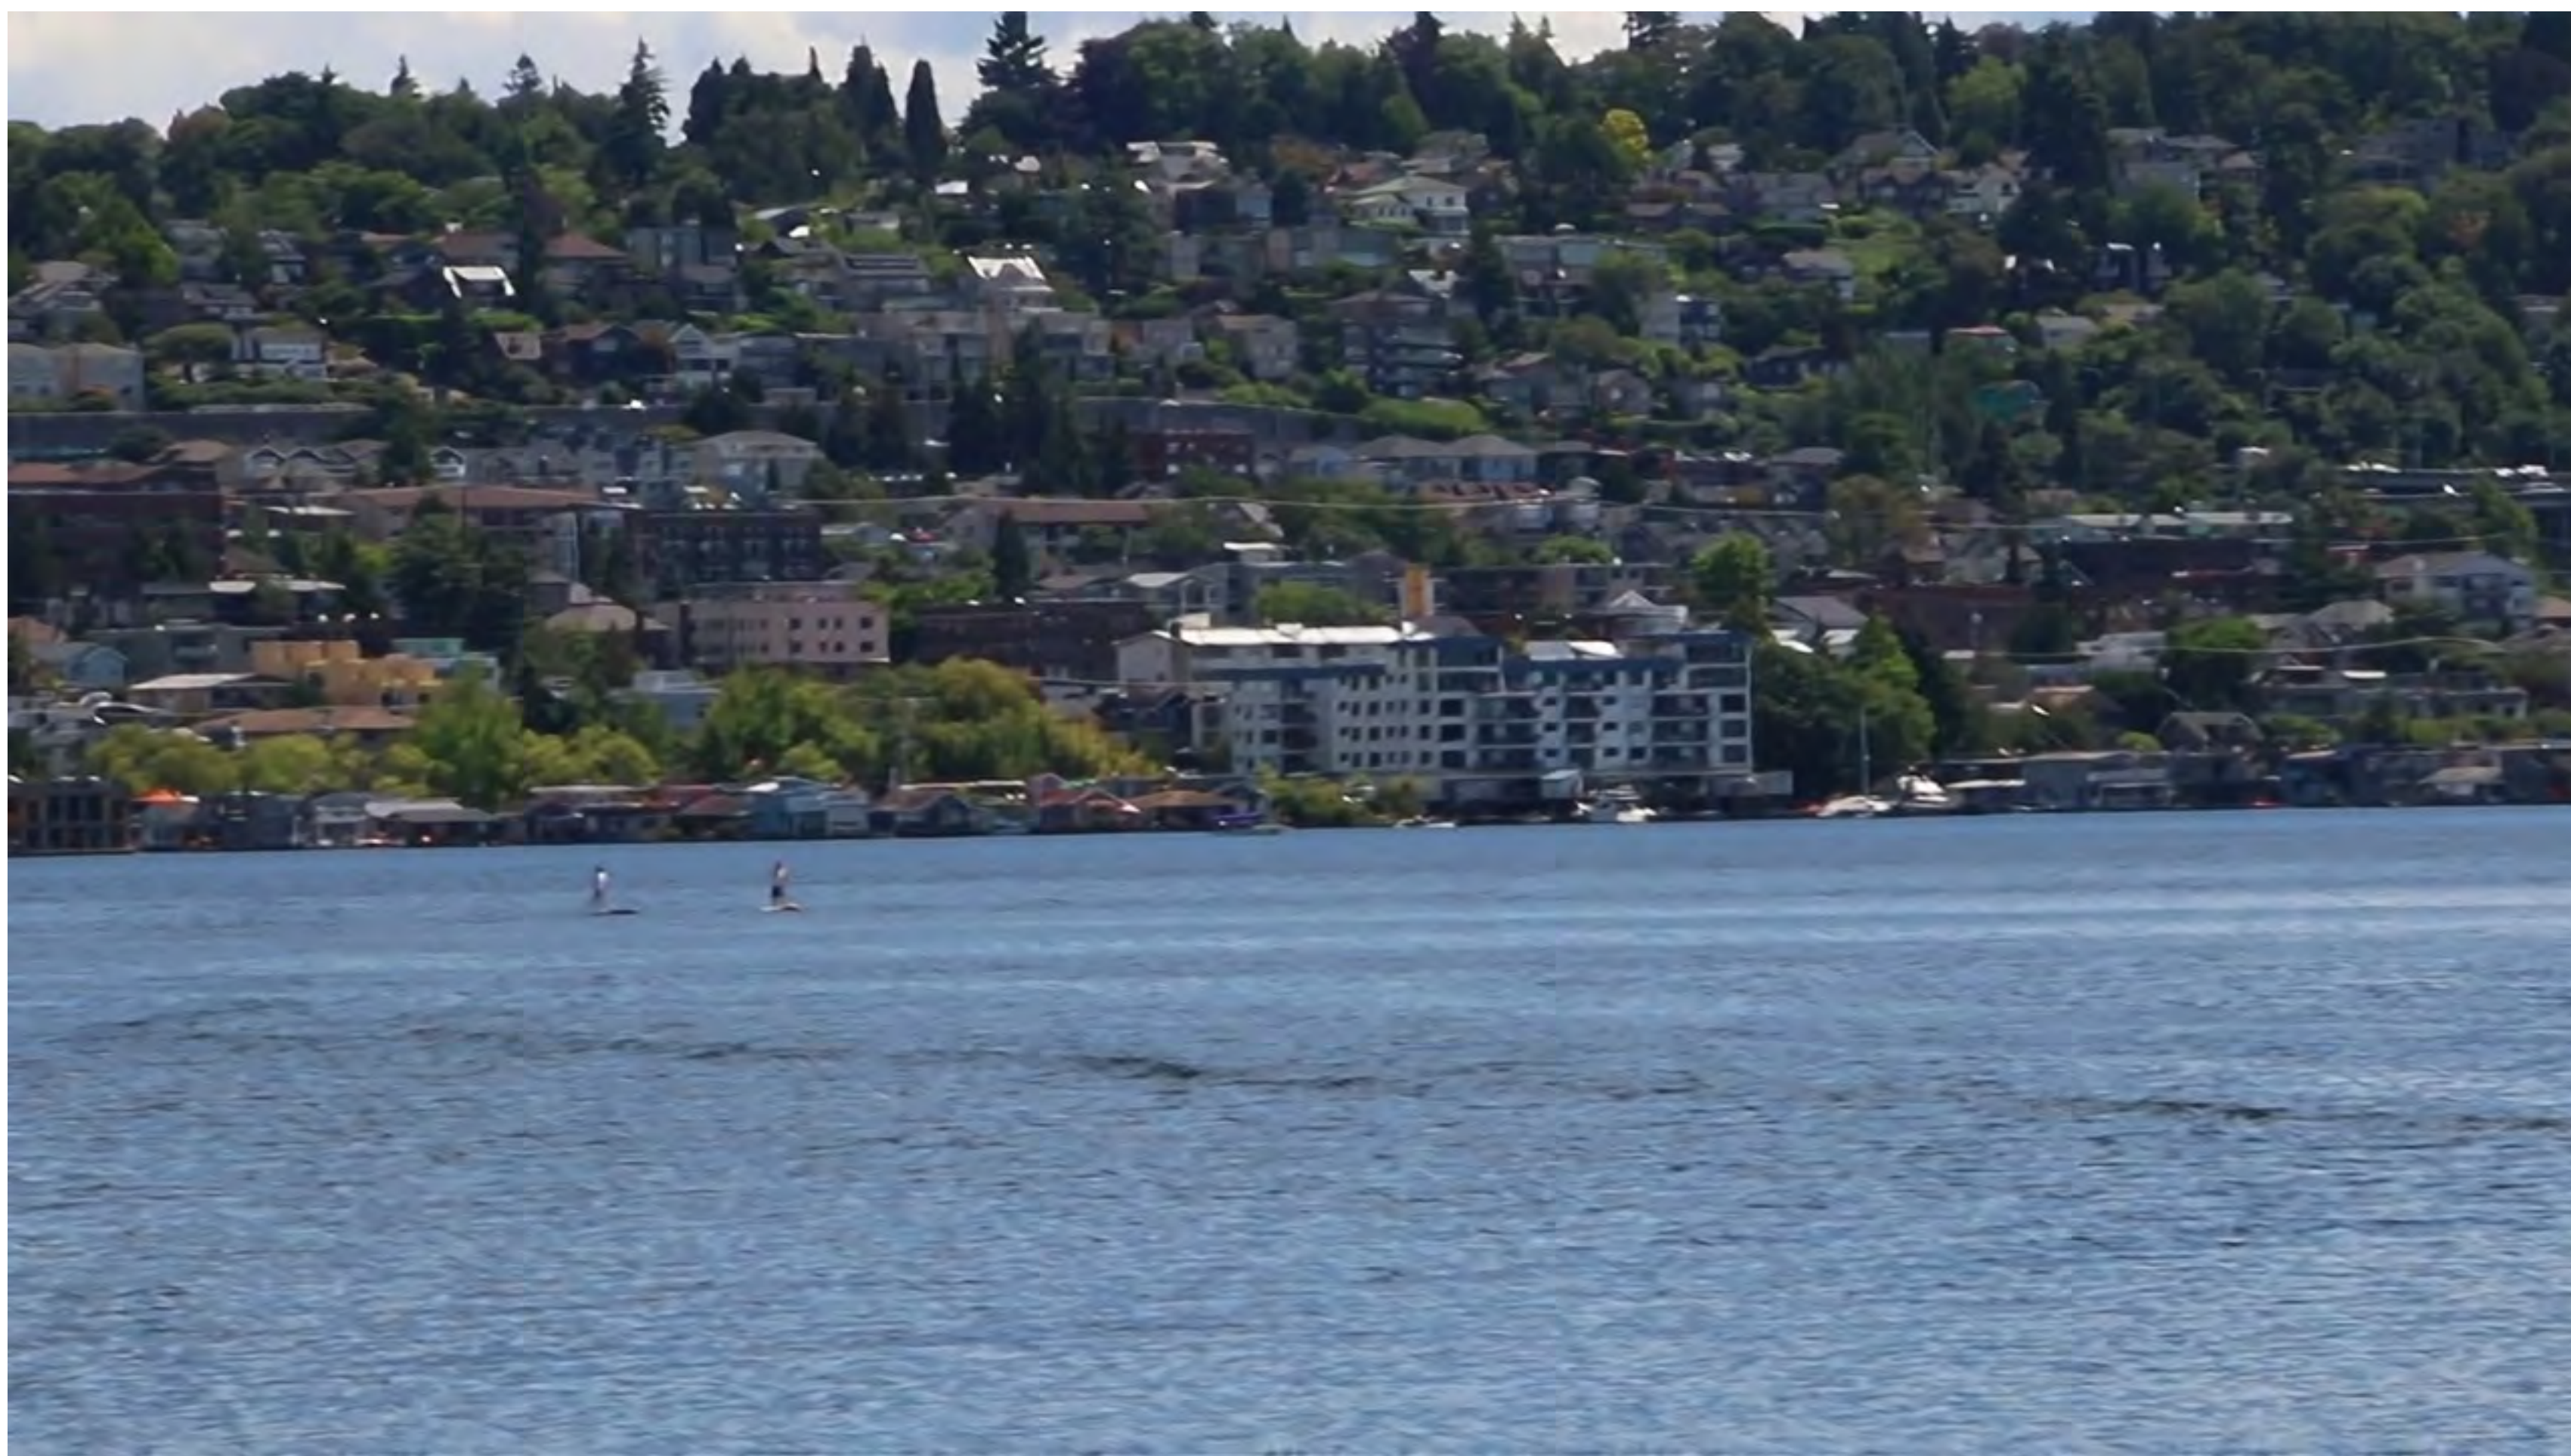

DBN+Flow



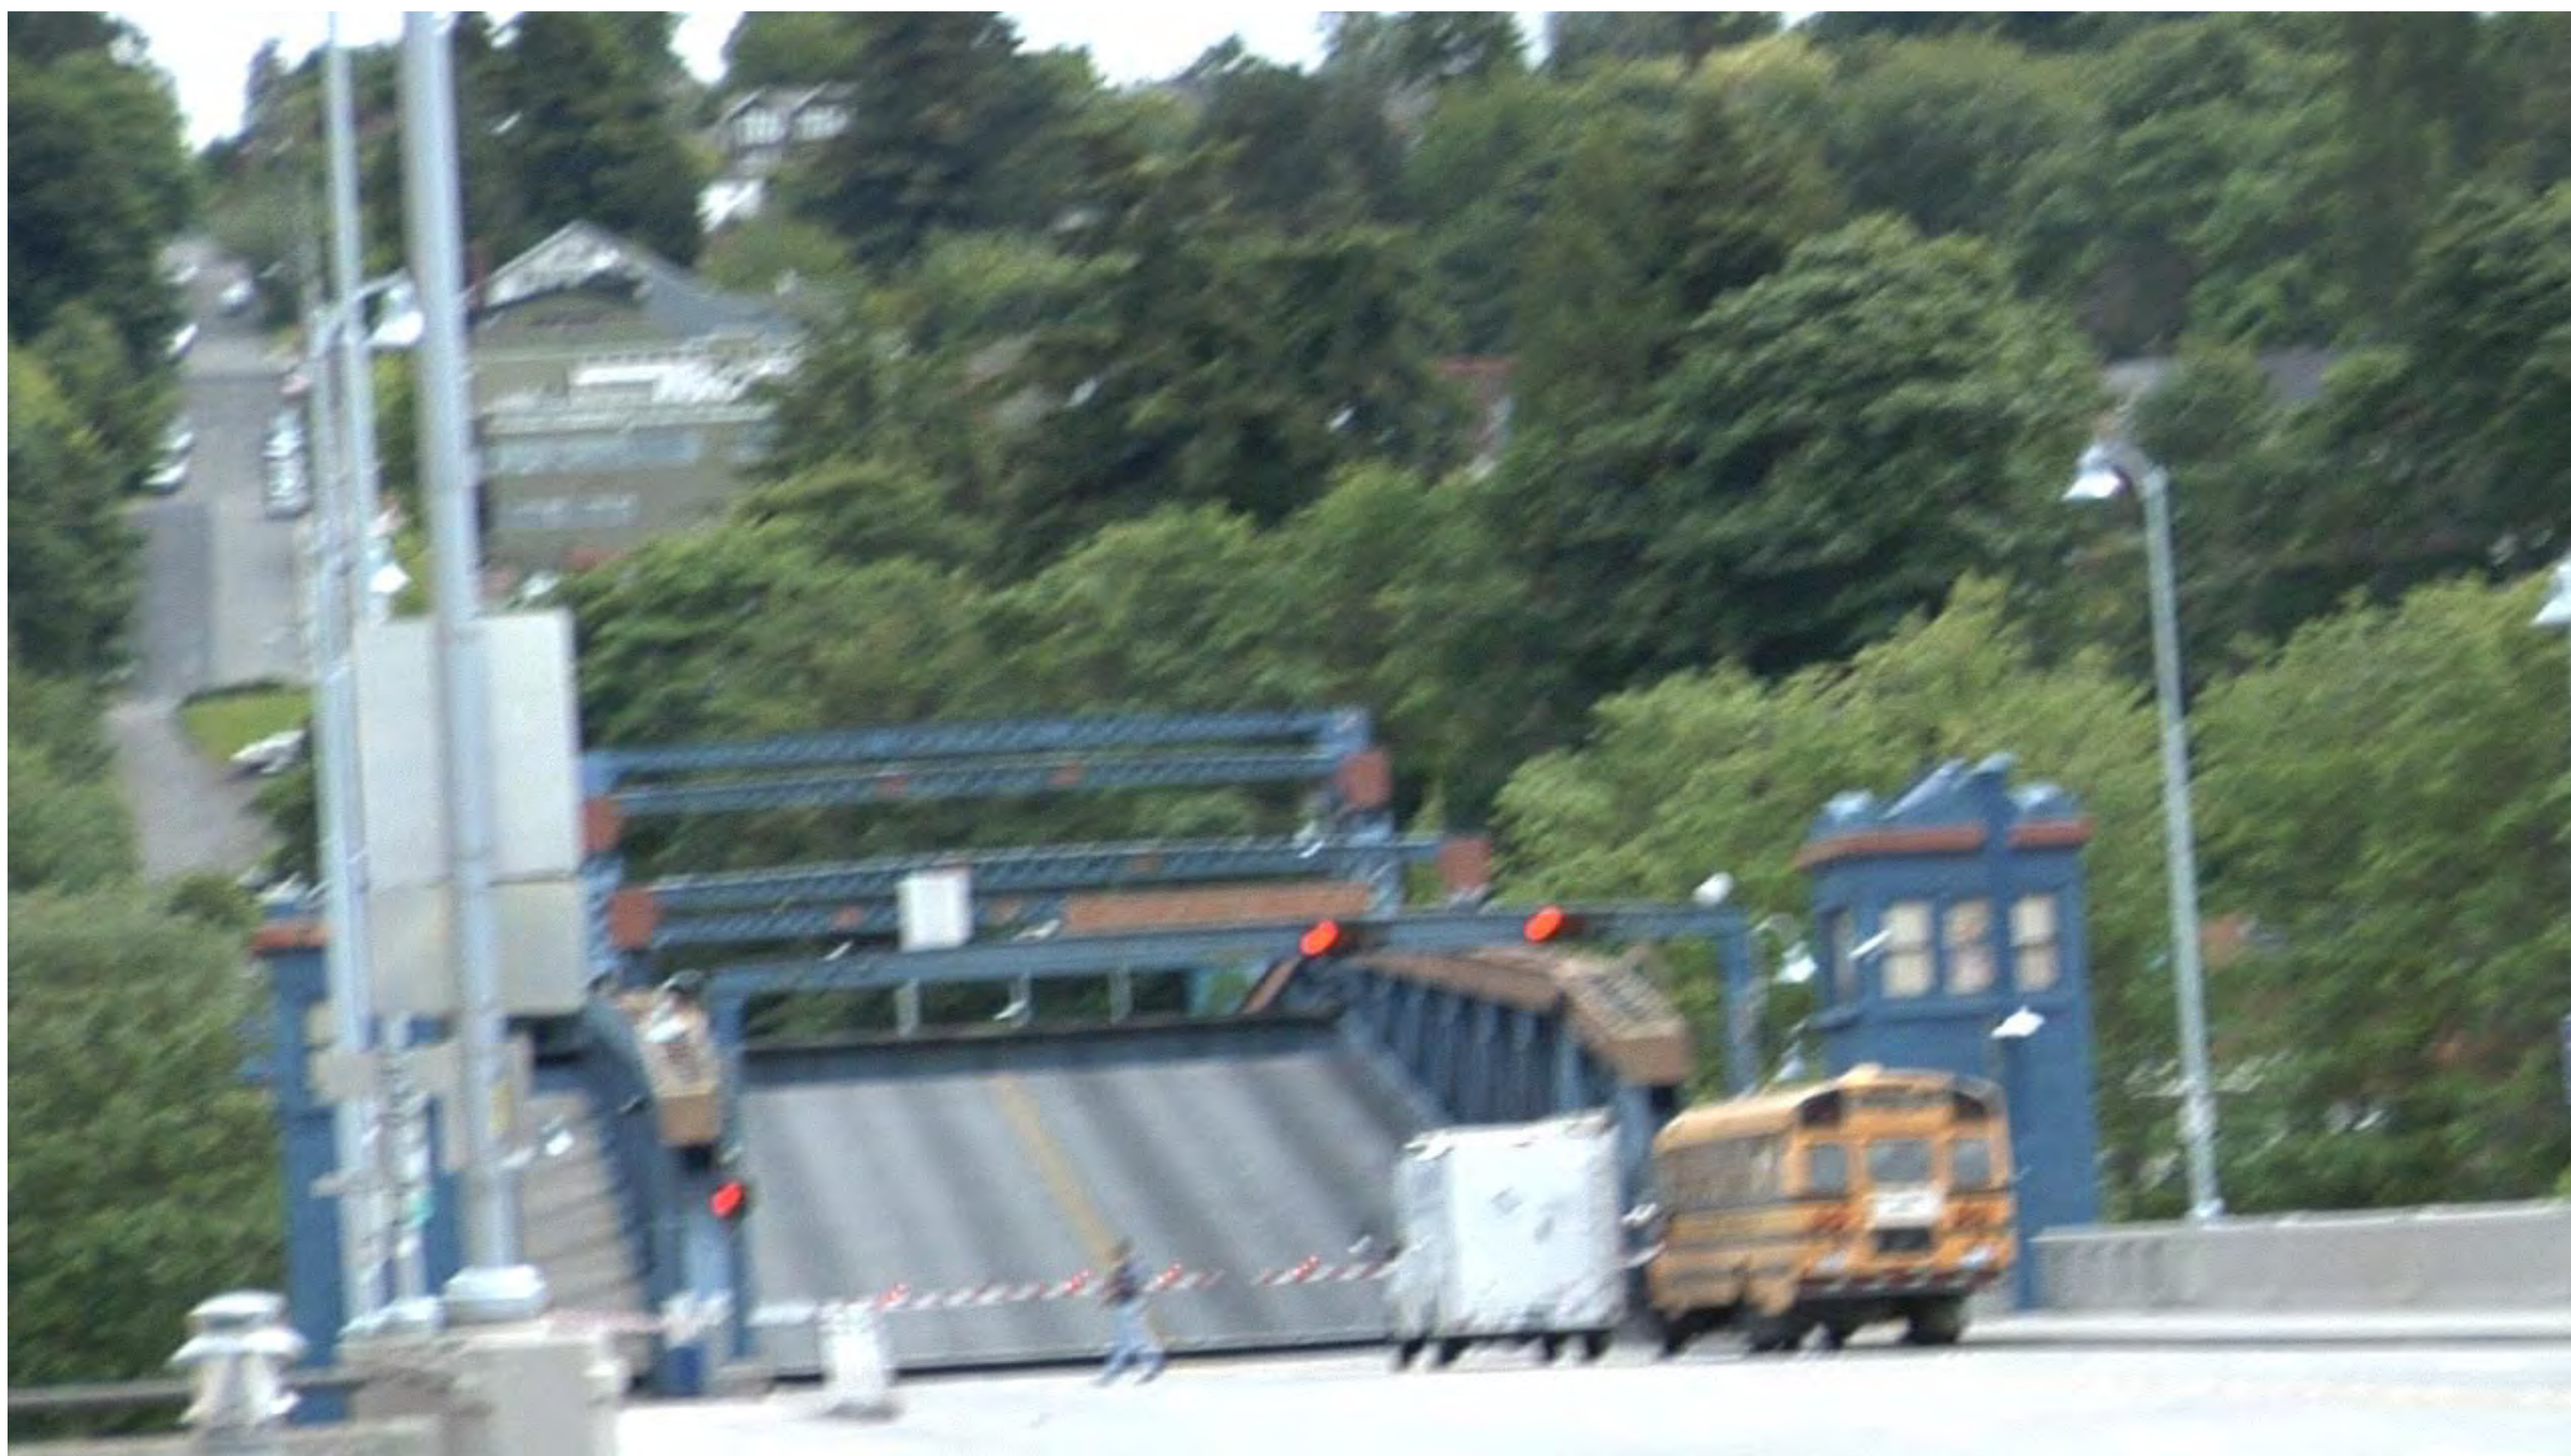

input



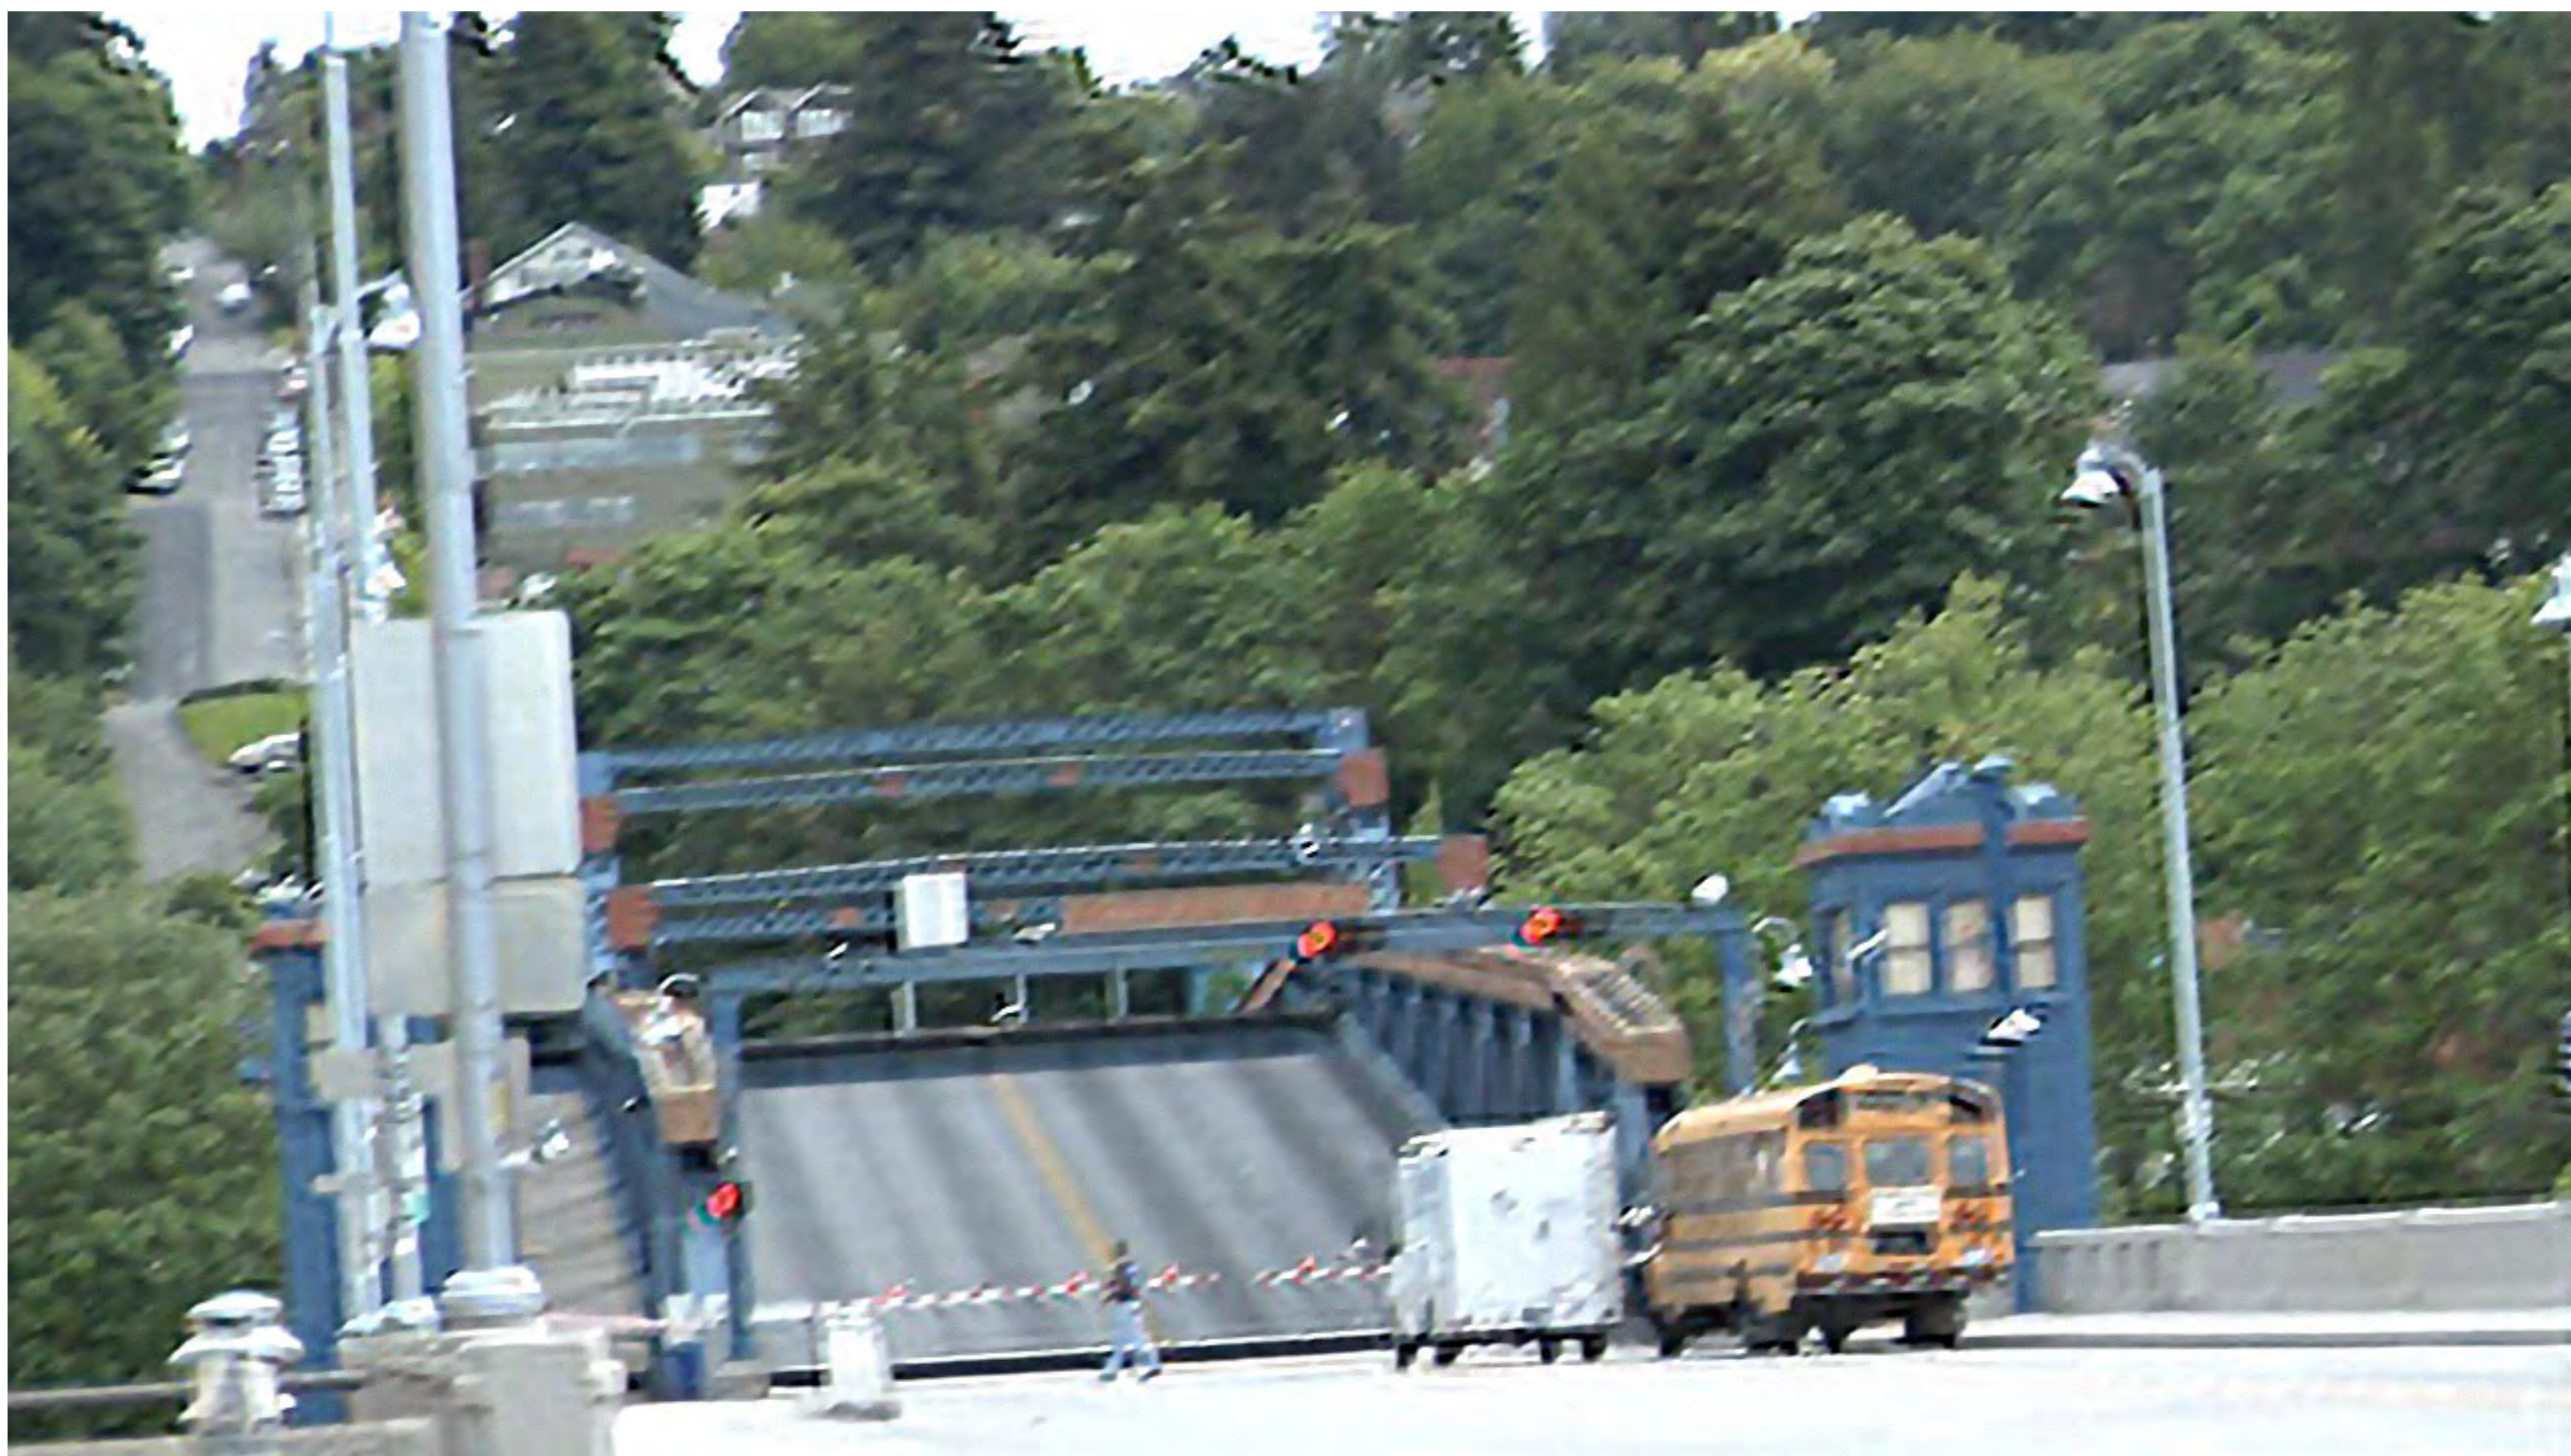

PSDeblur



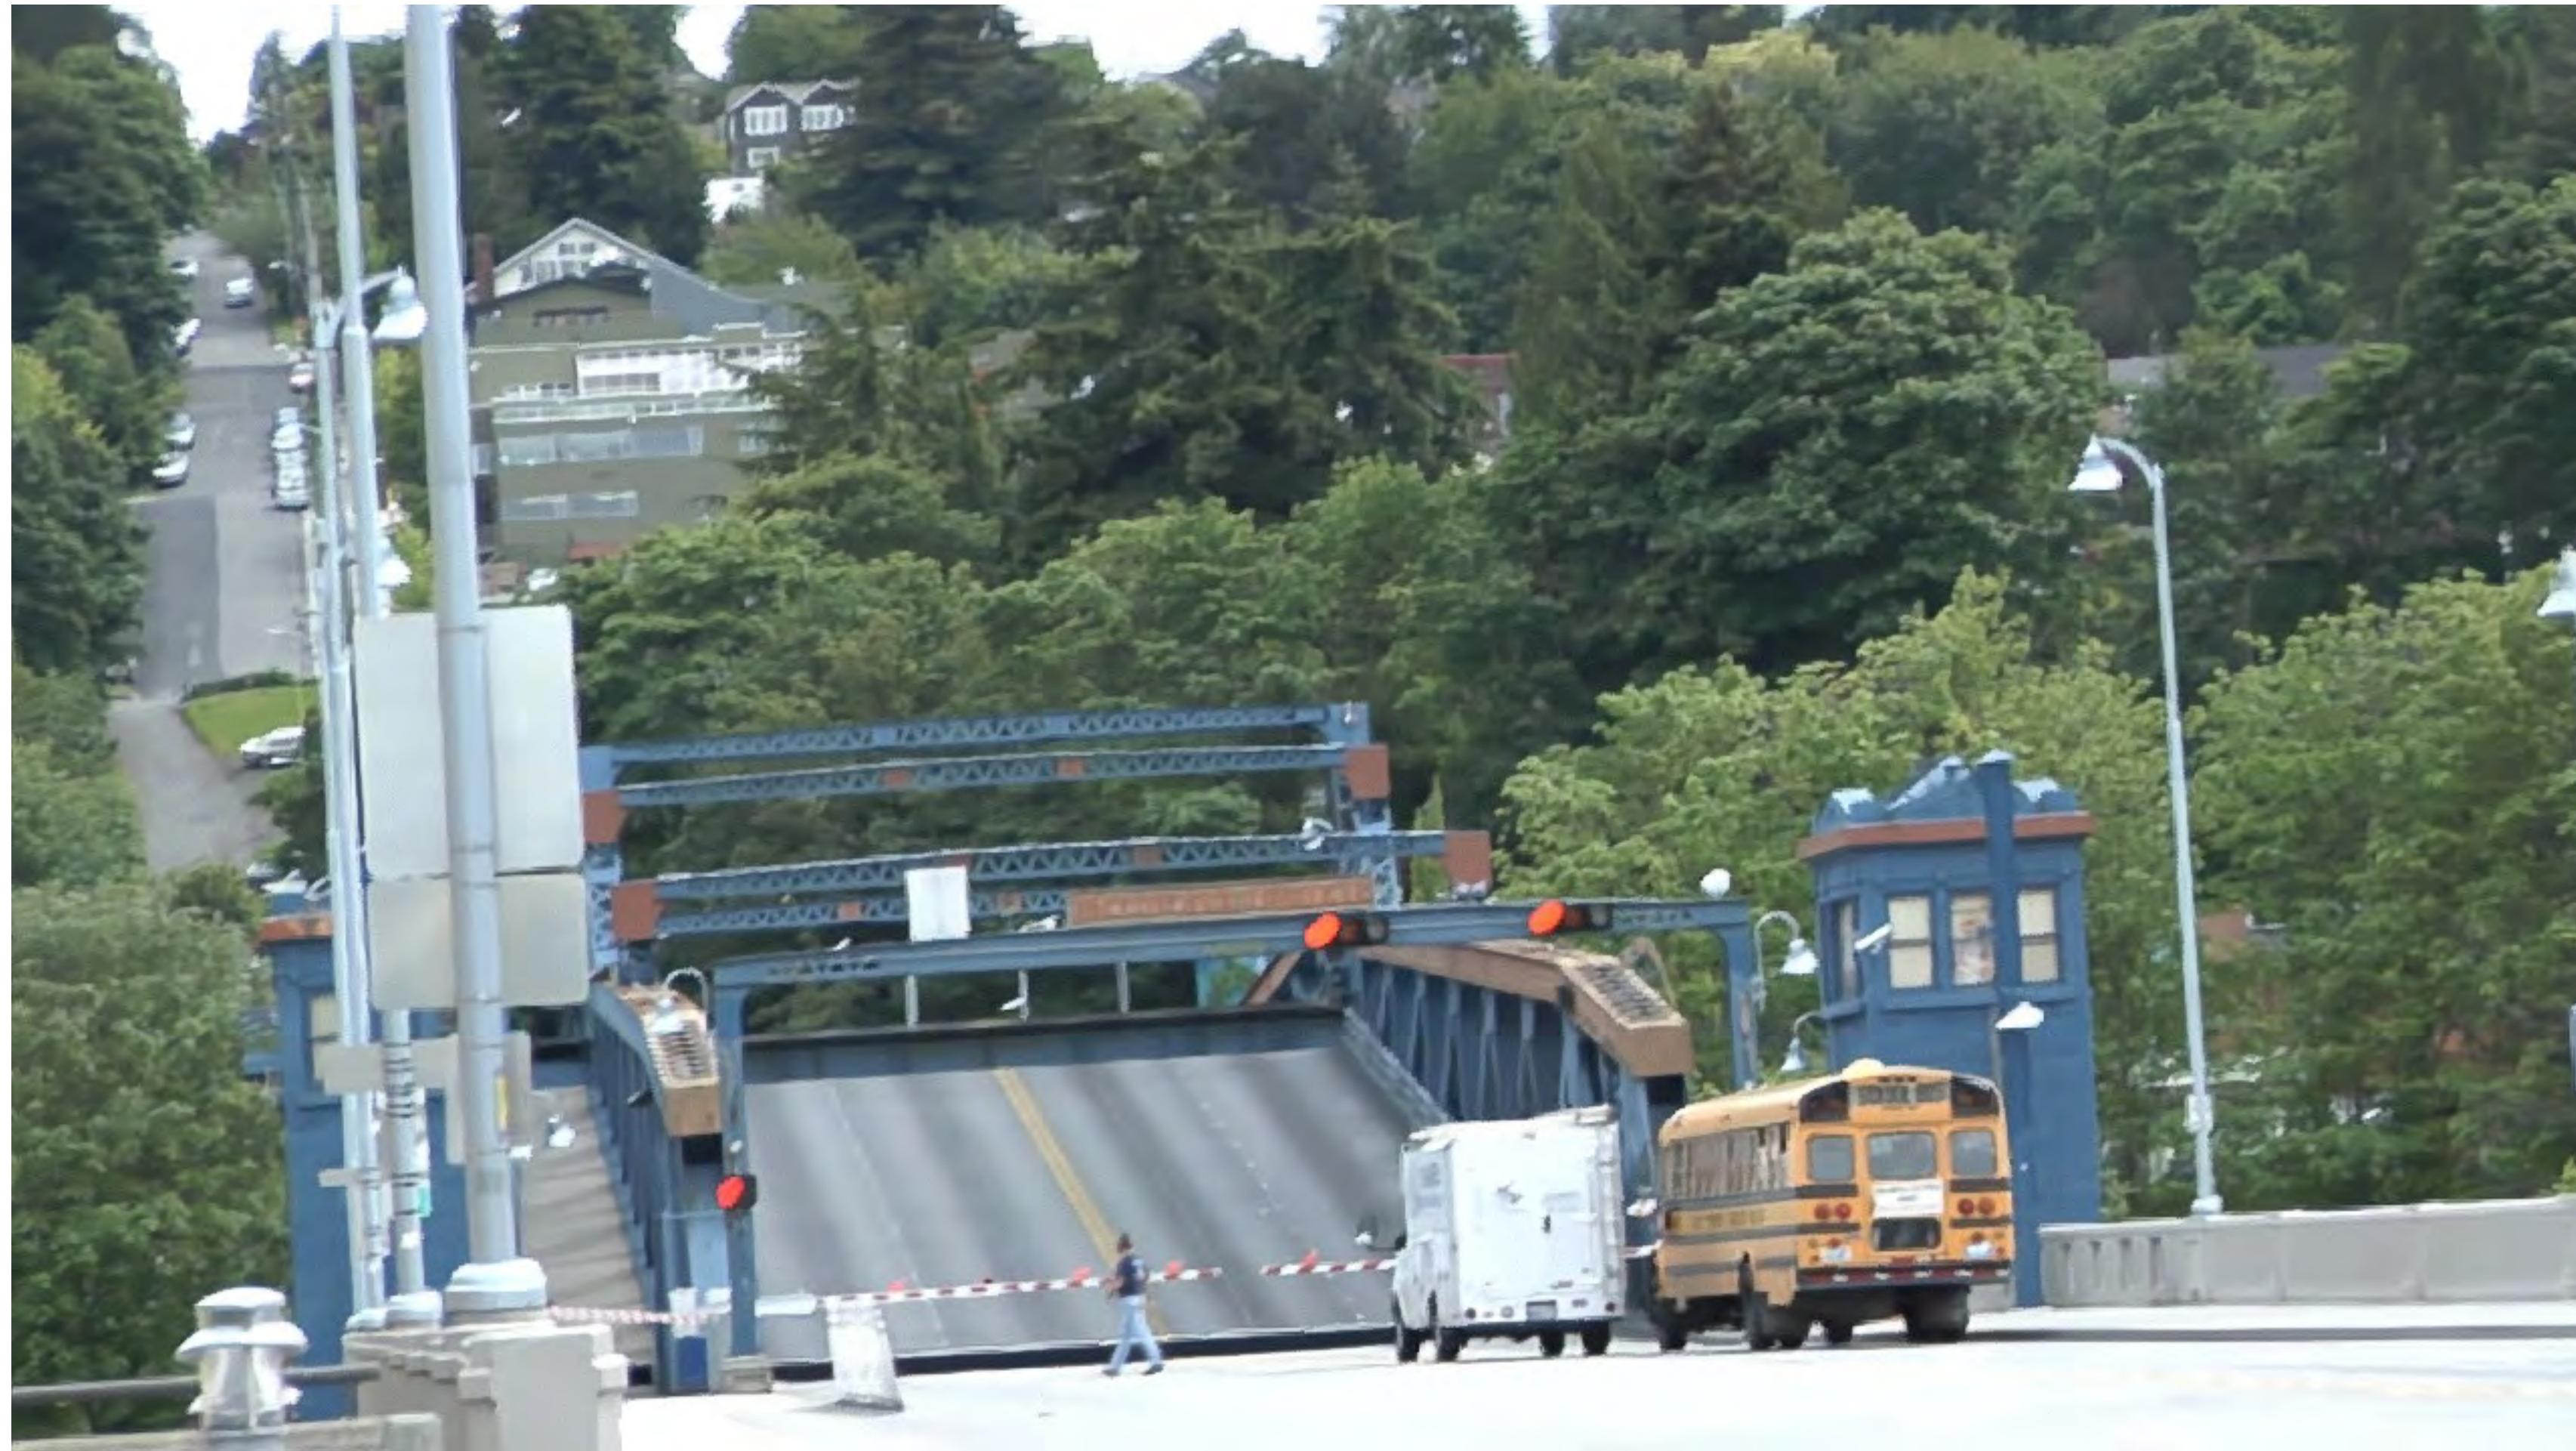

Cho [3]



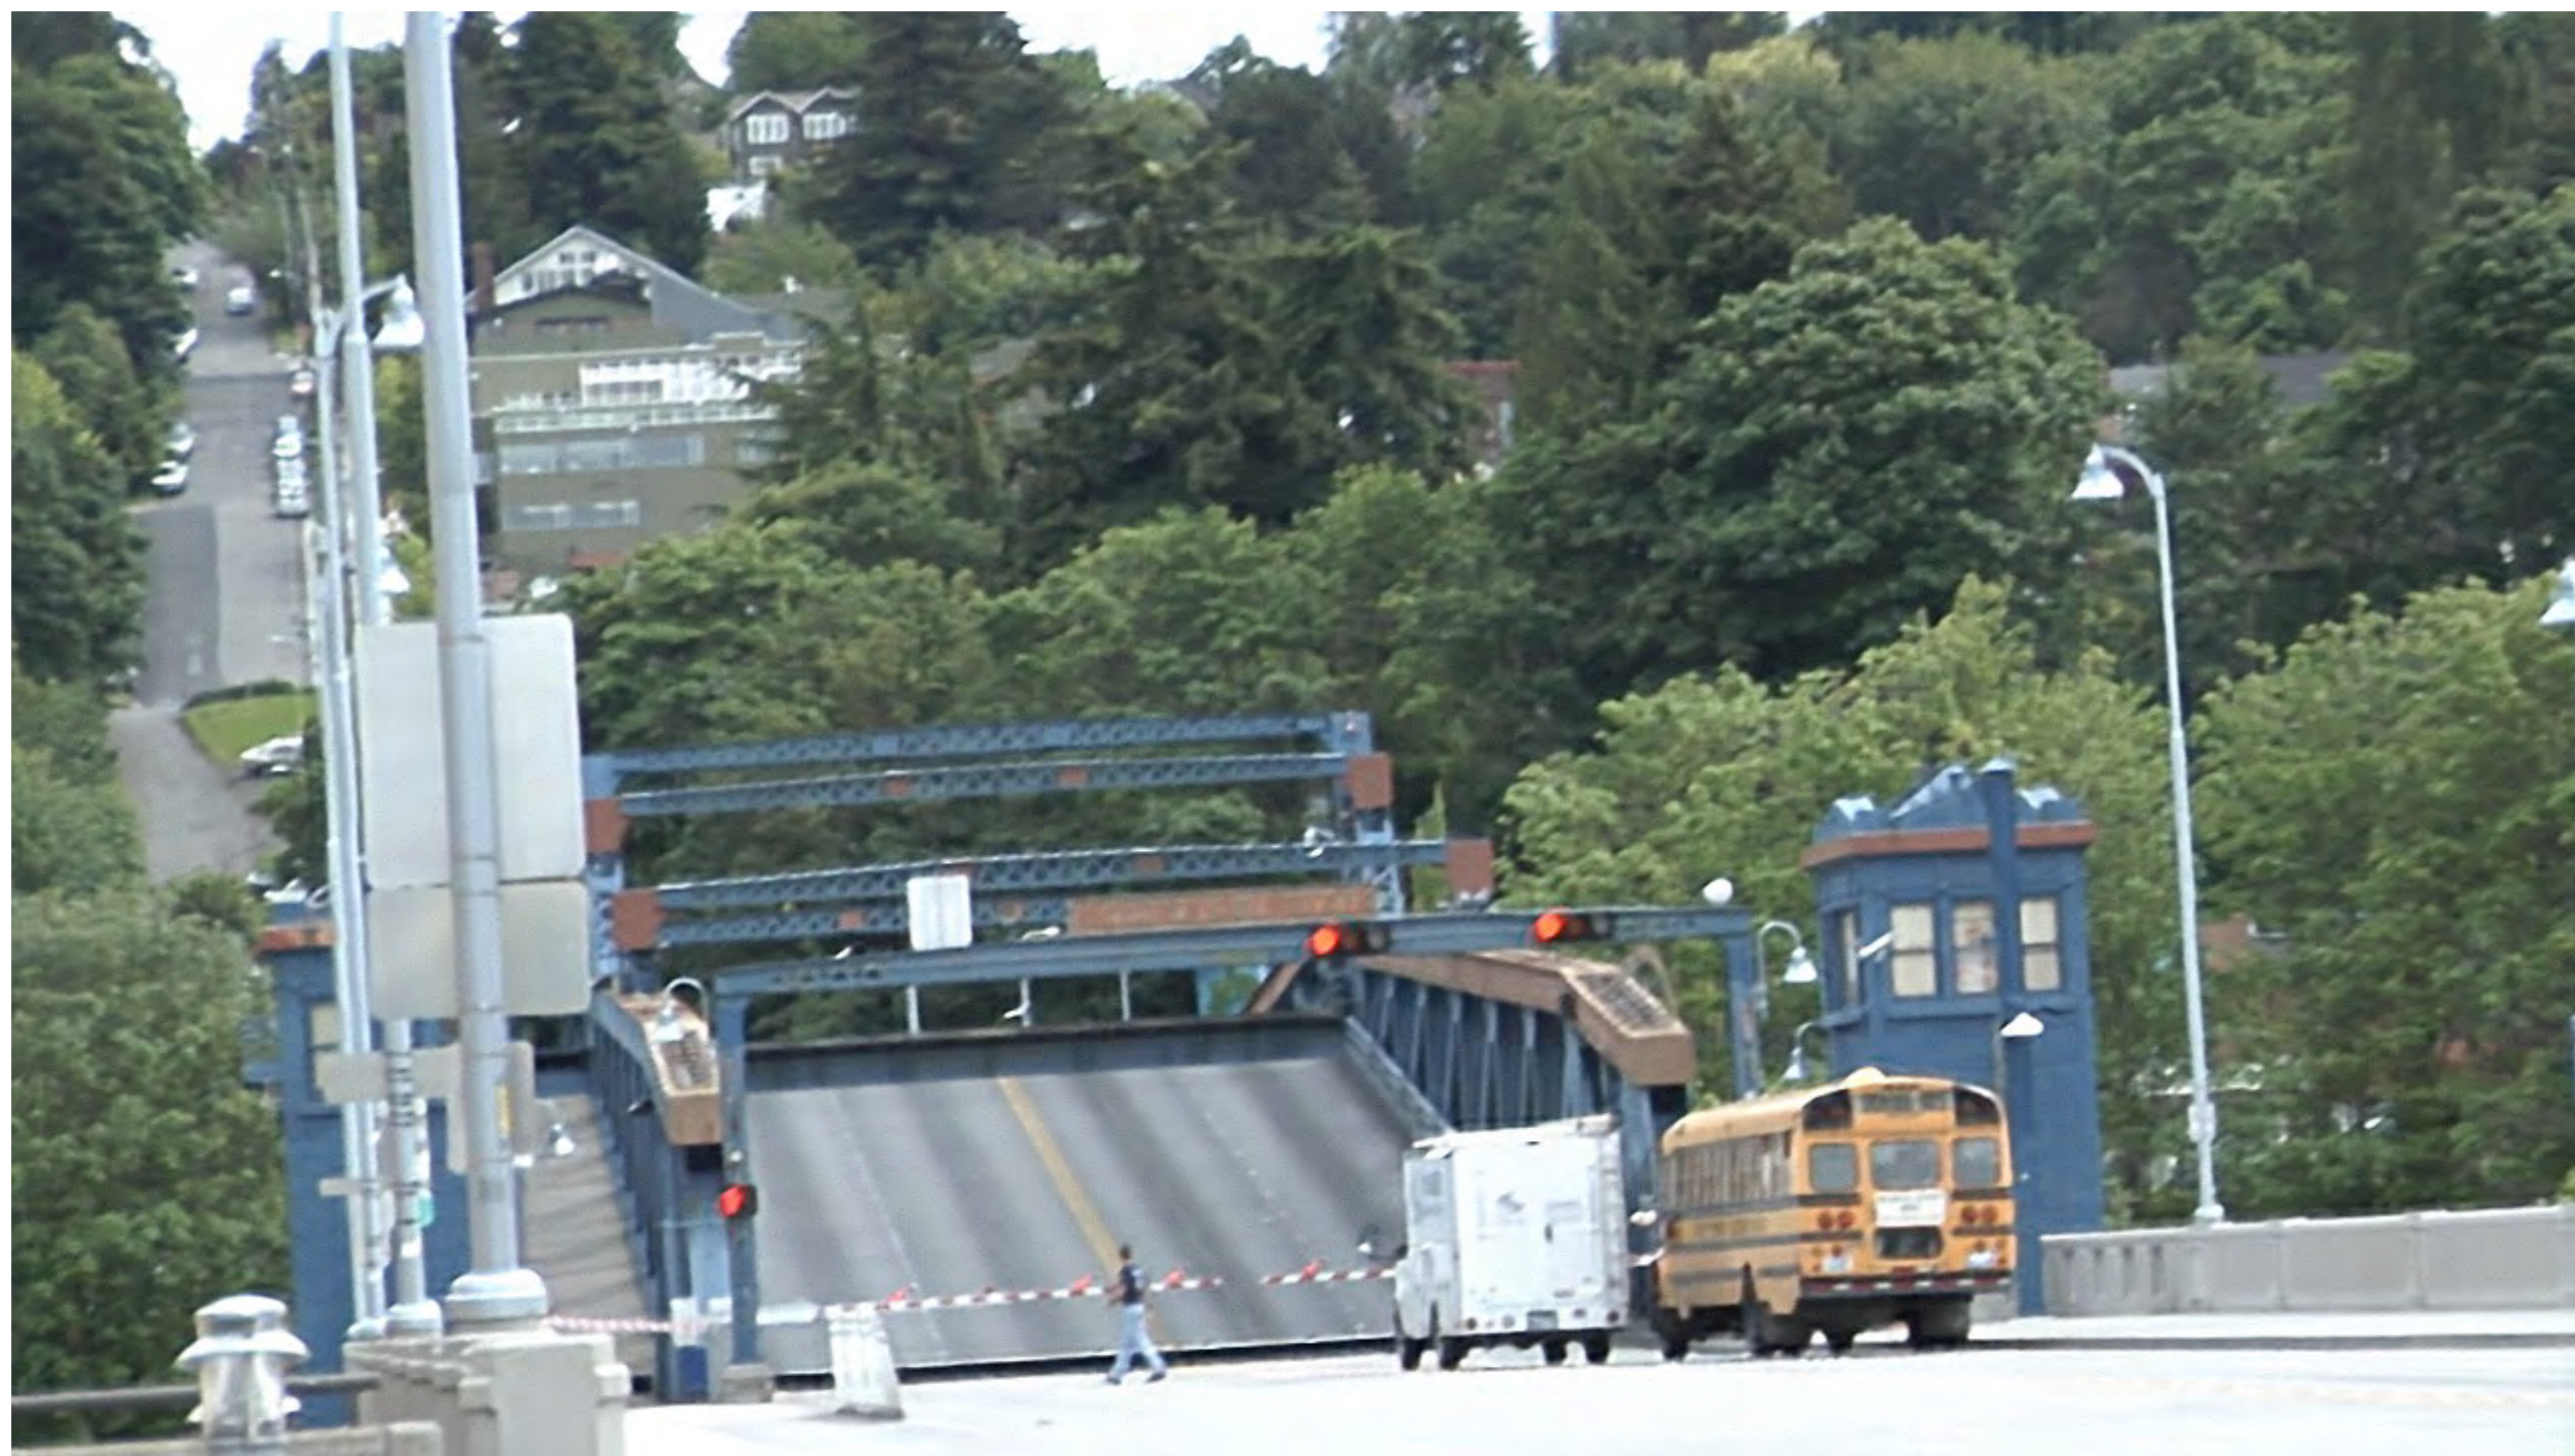

Kim and Lee [15]



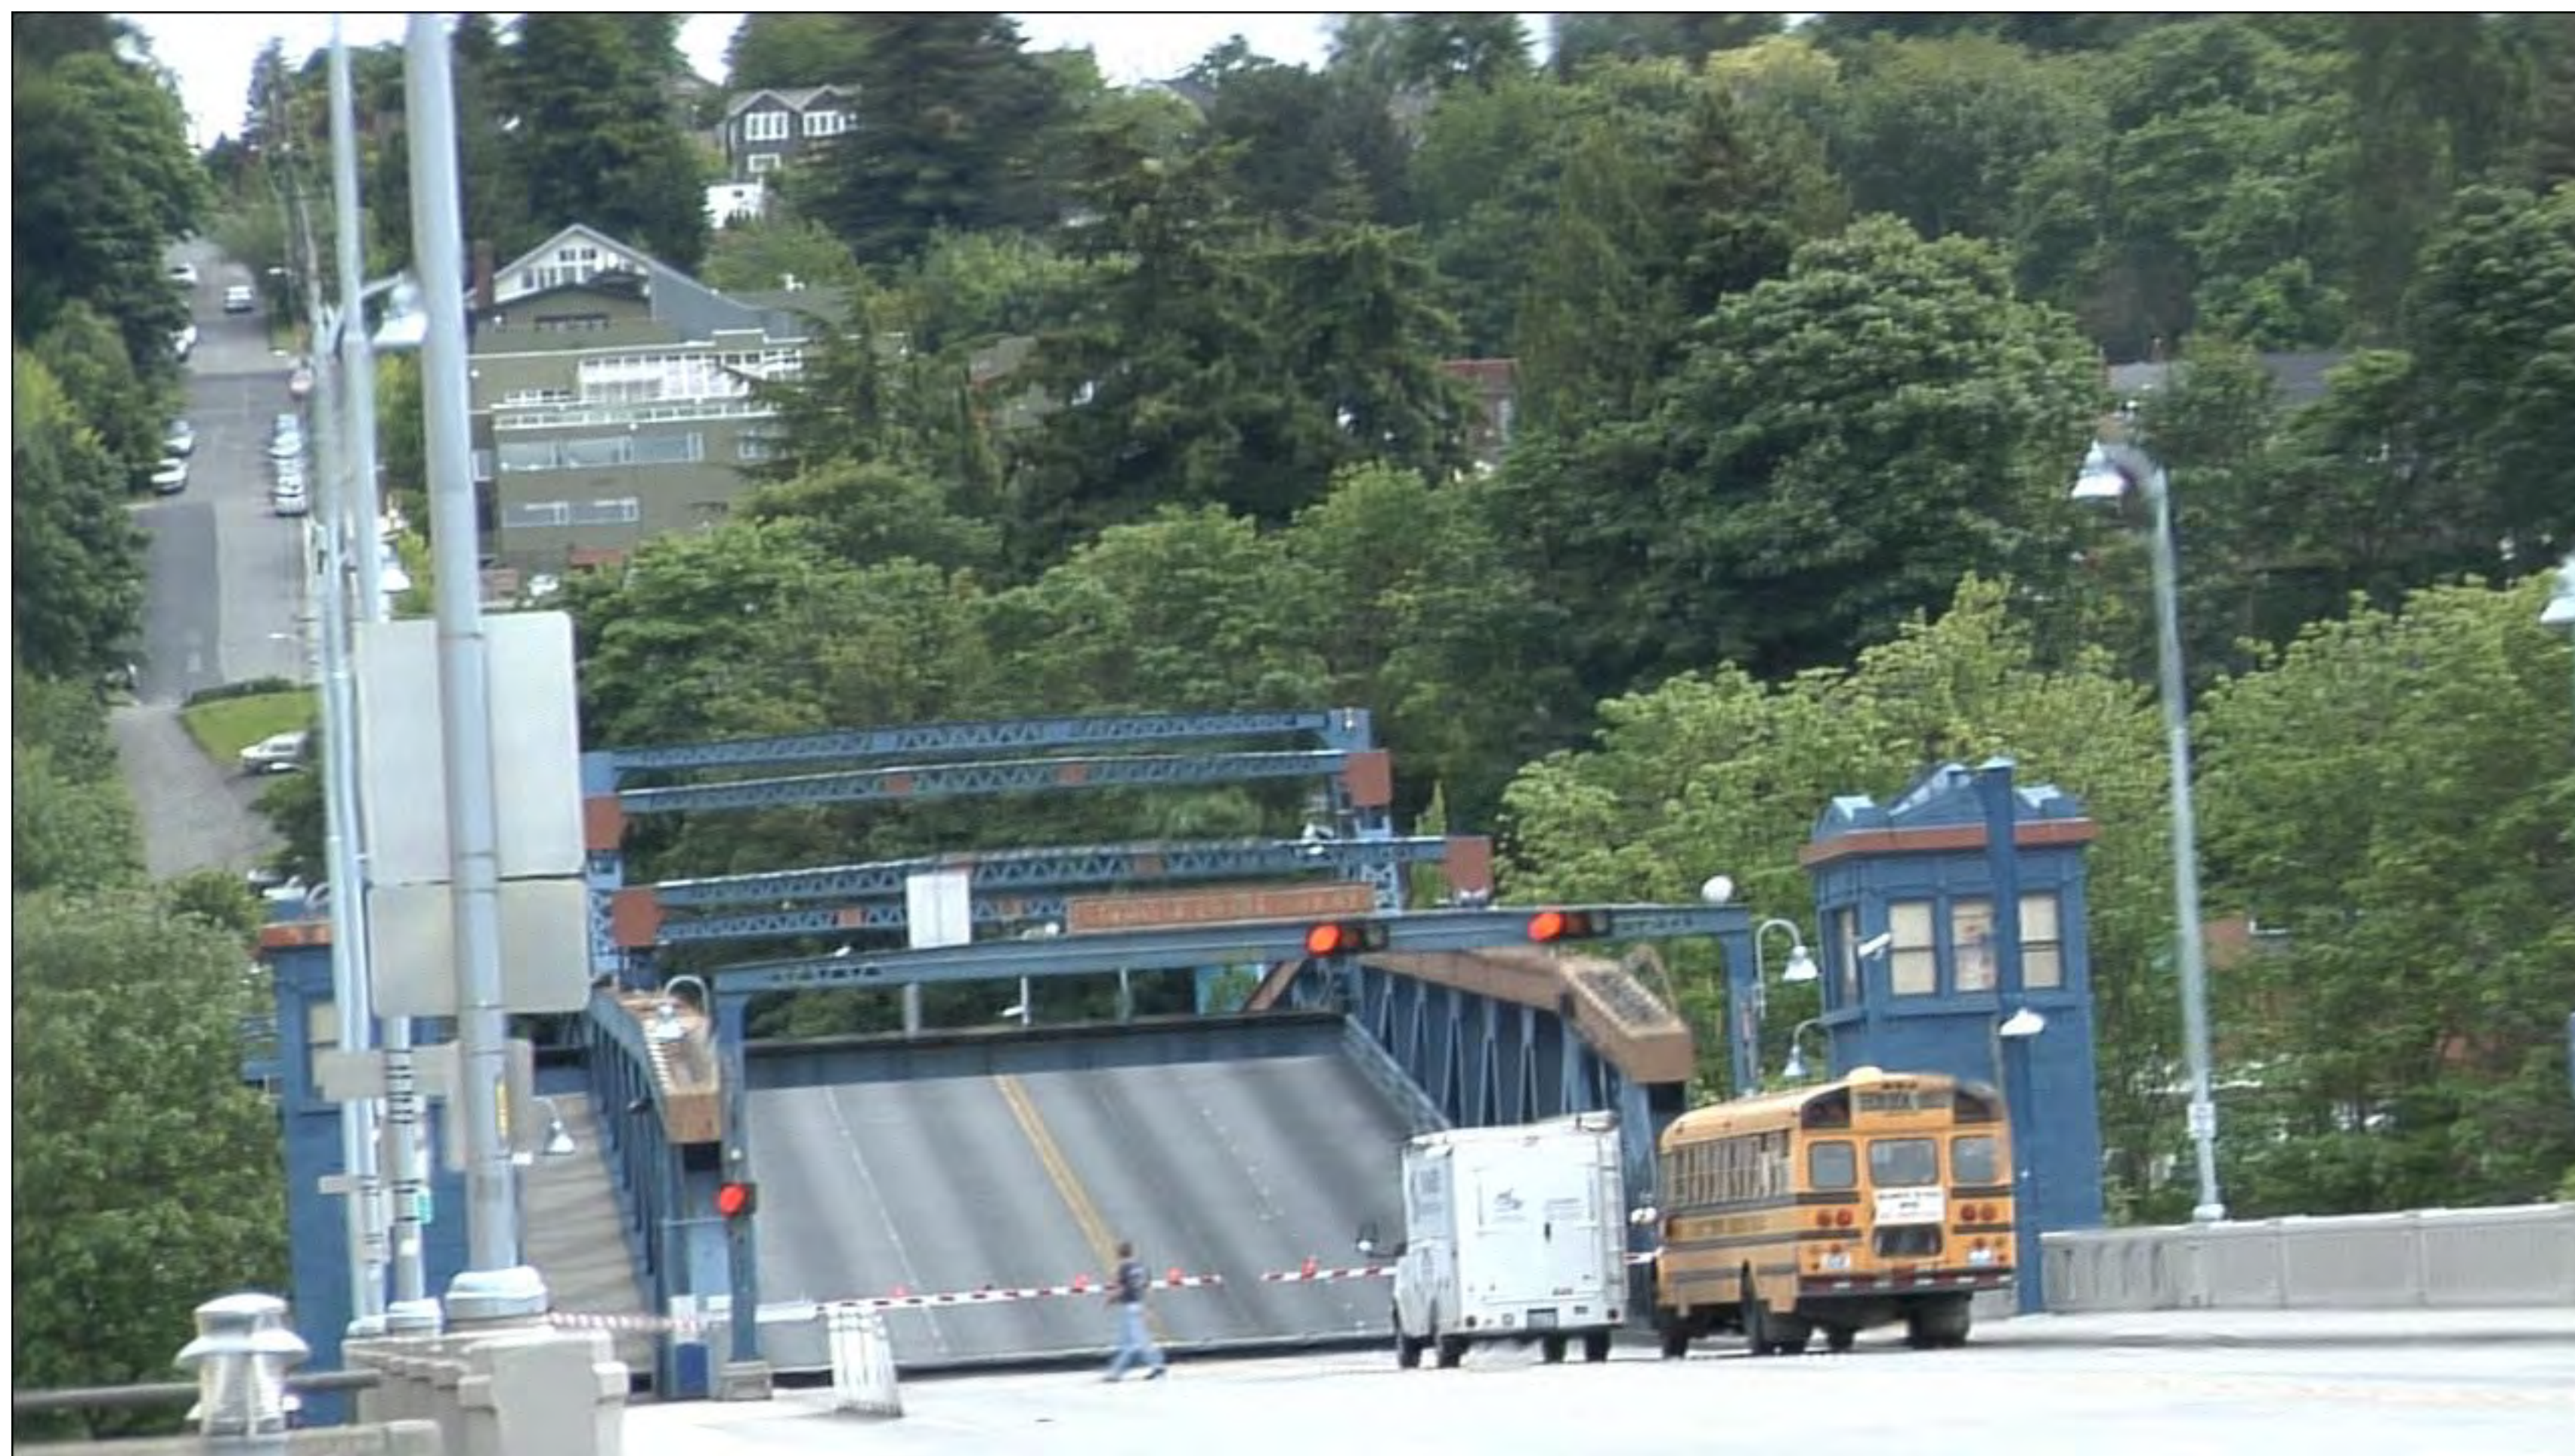

WFA [5]



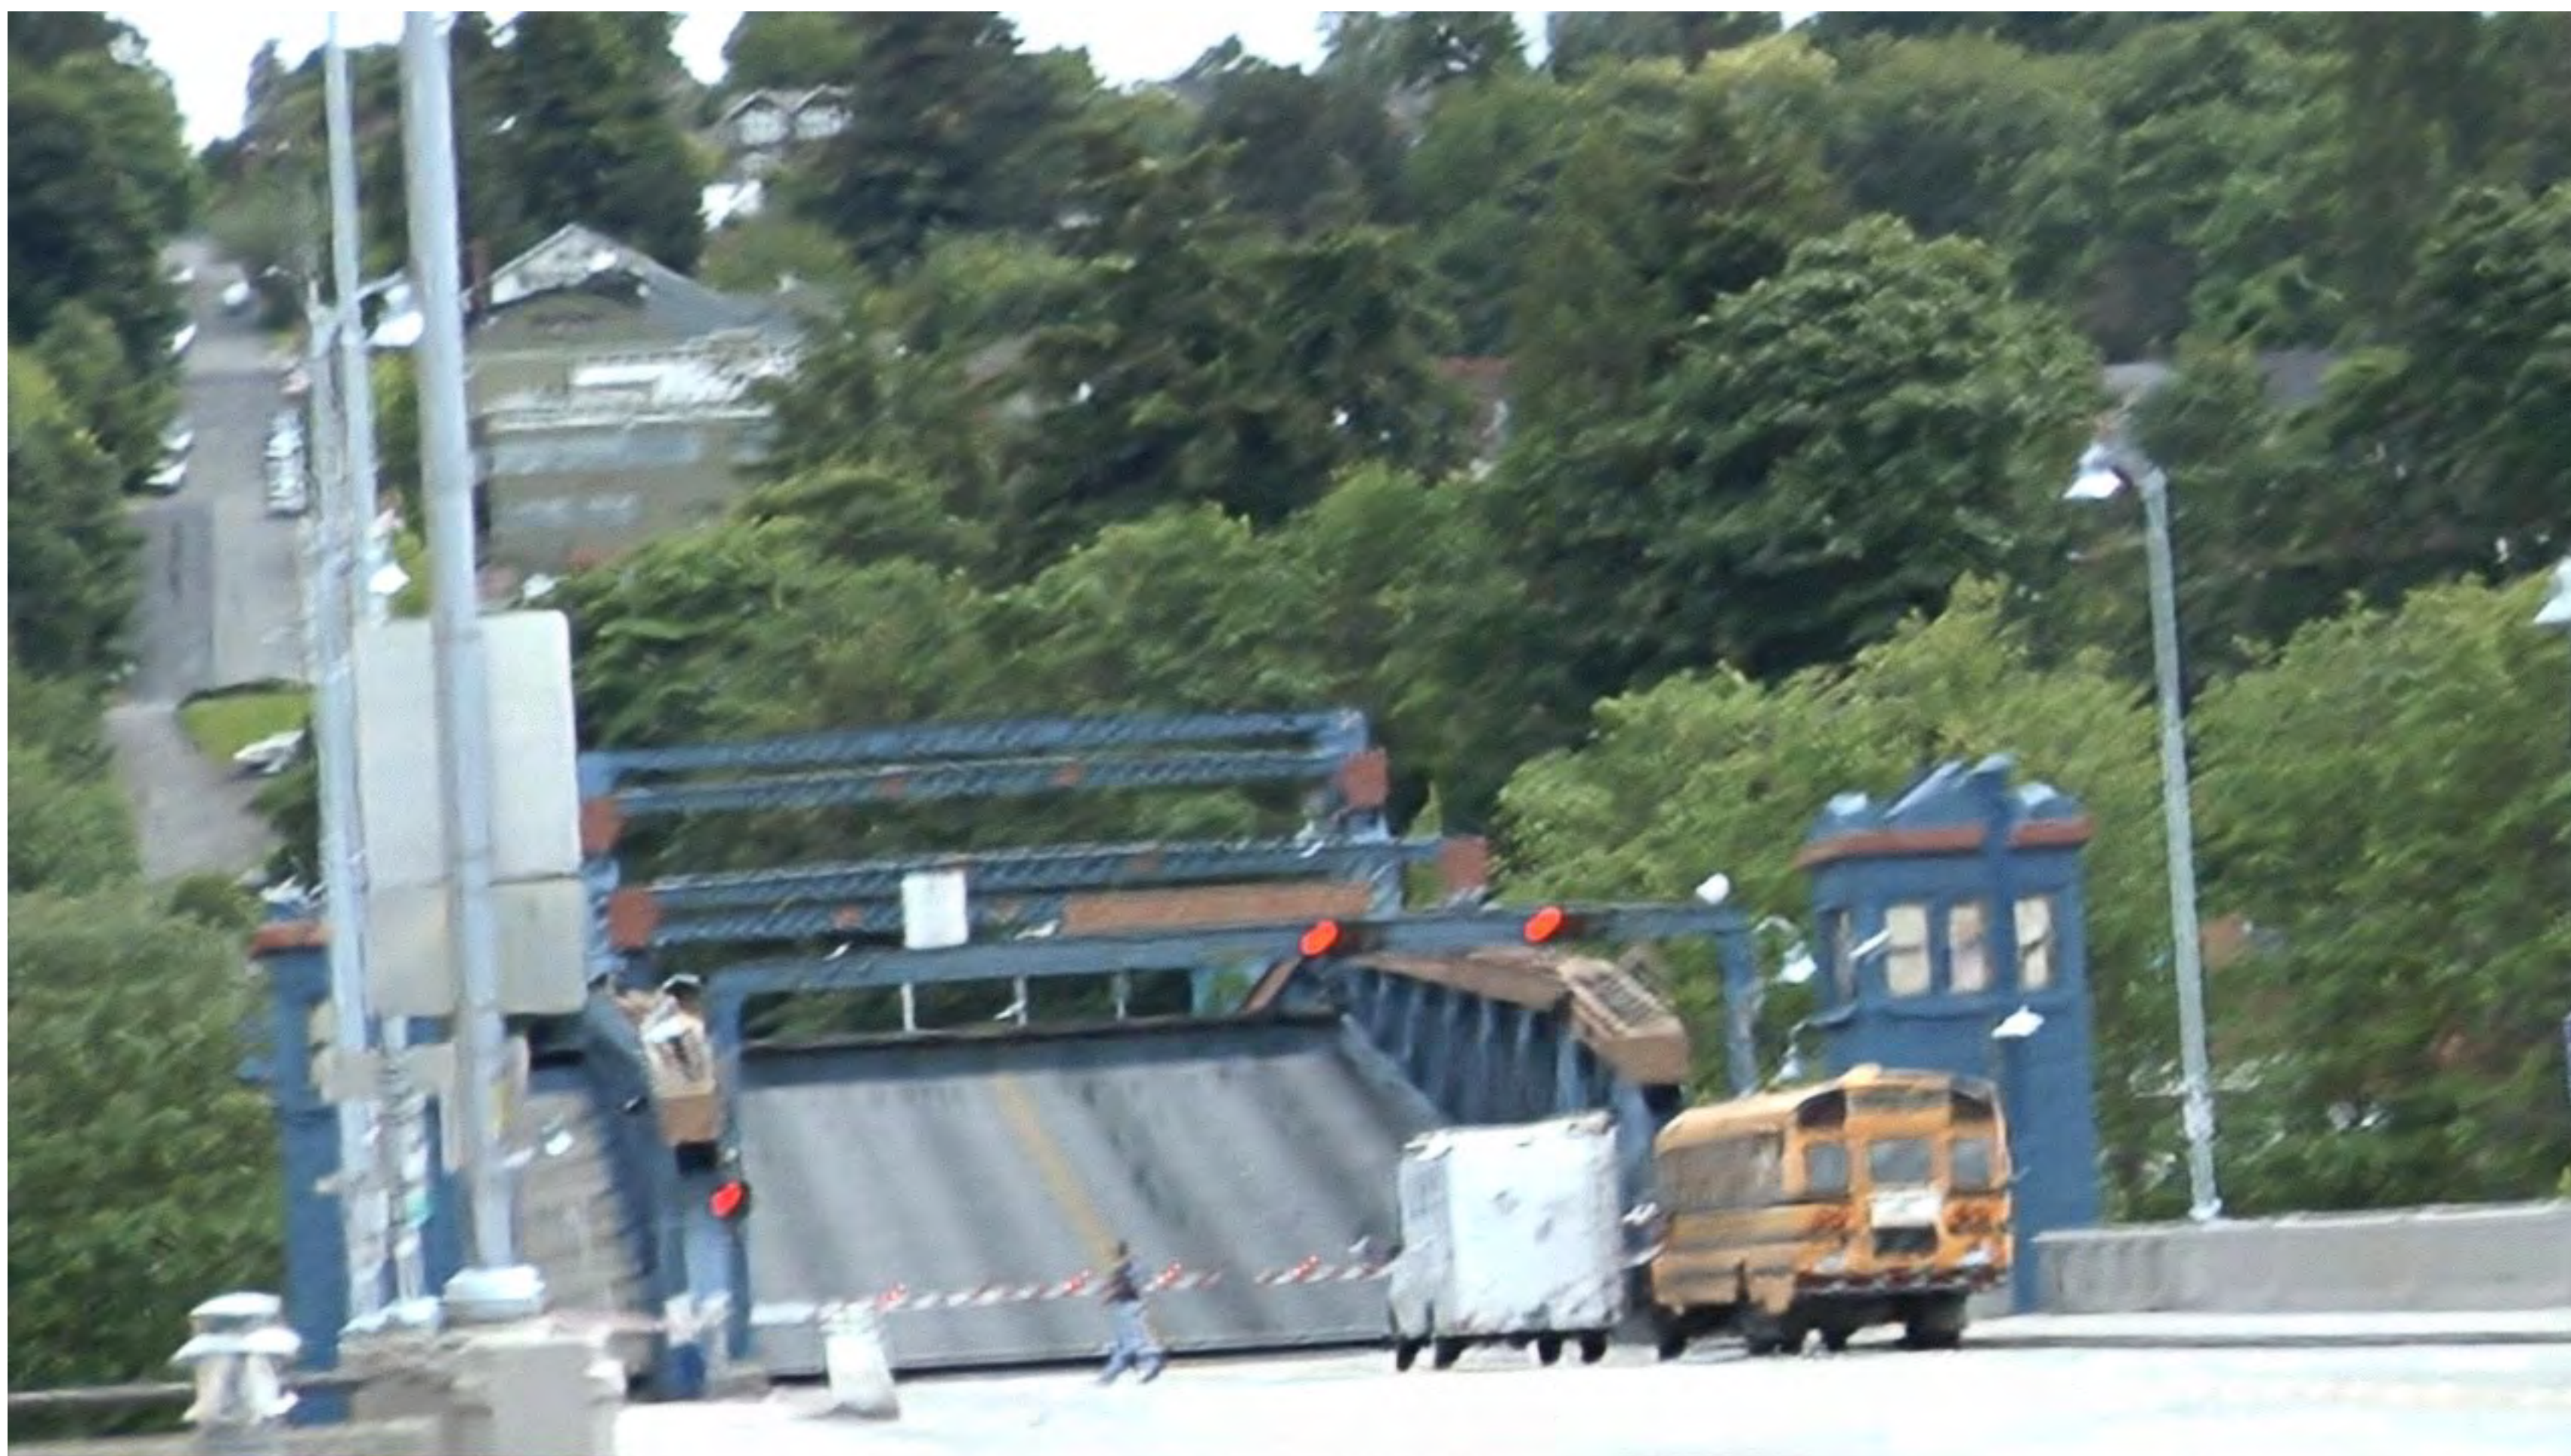

DBN+Single



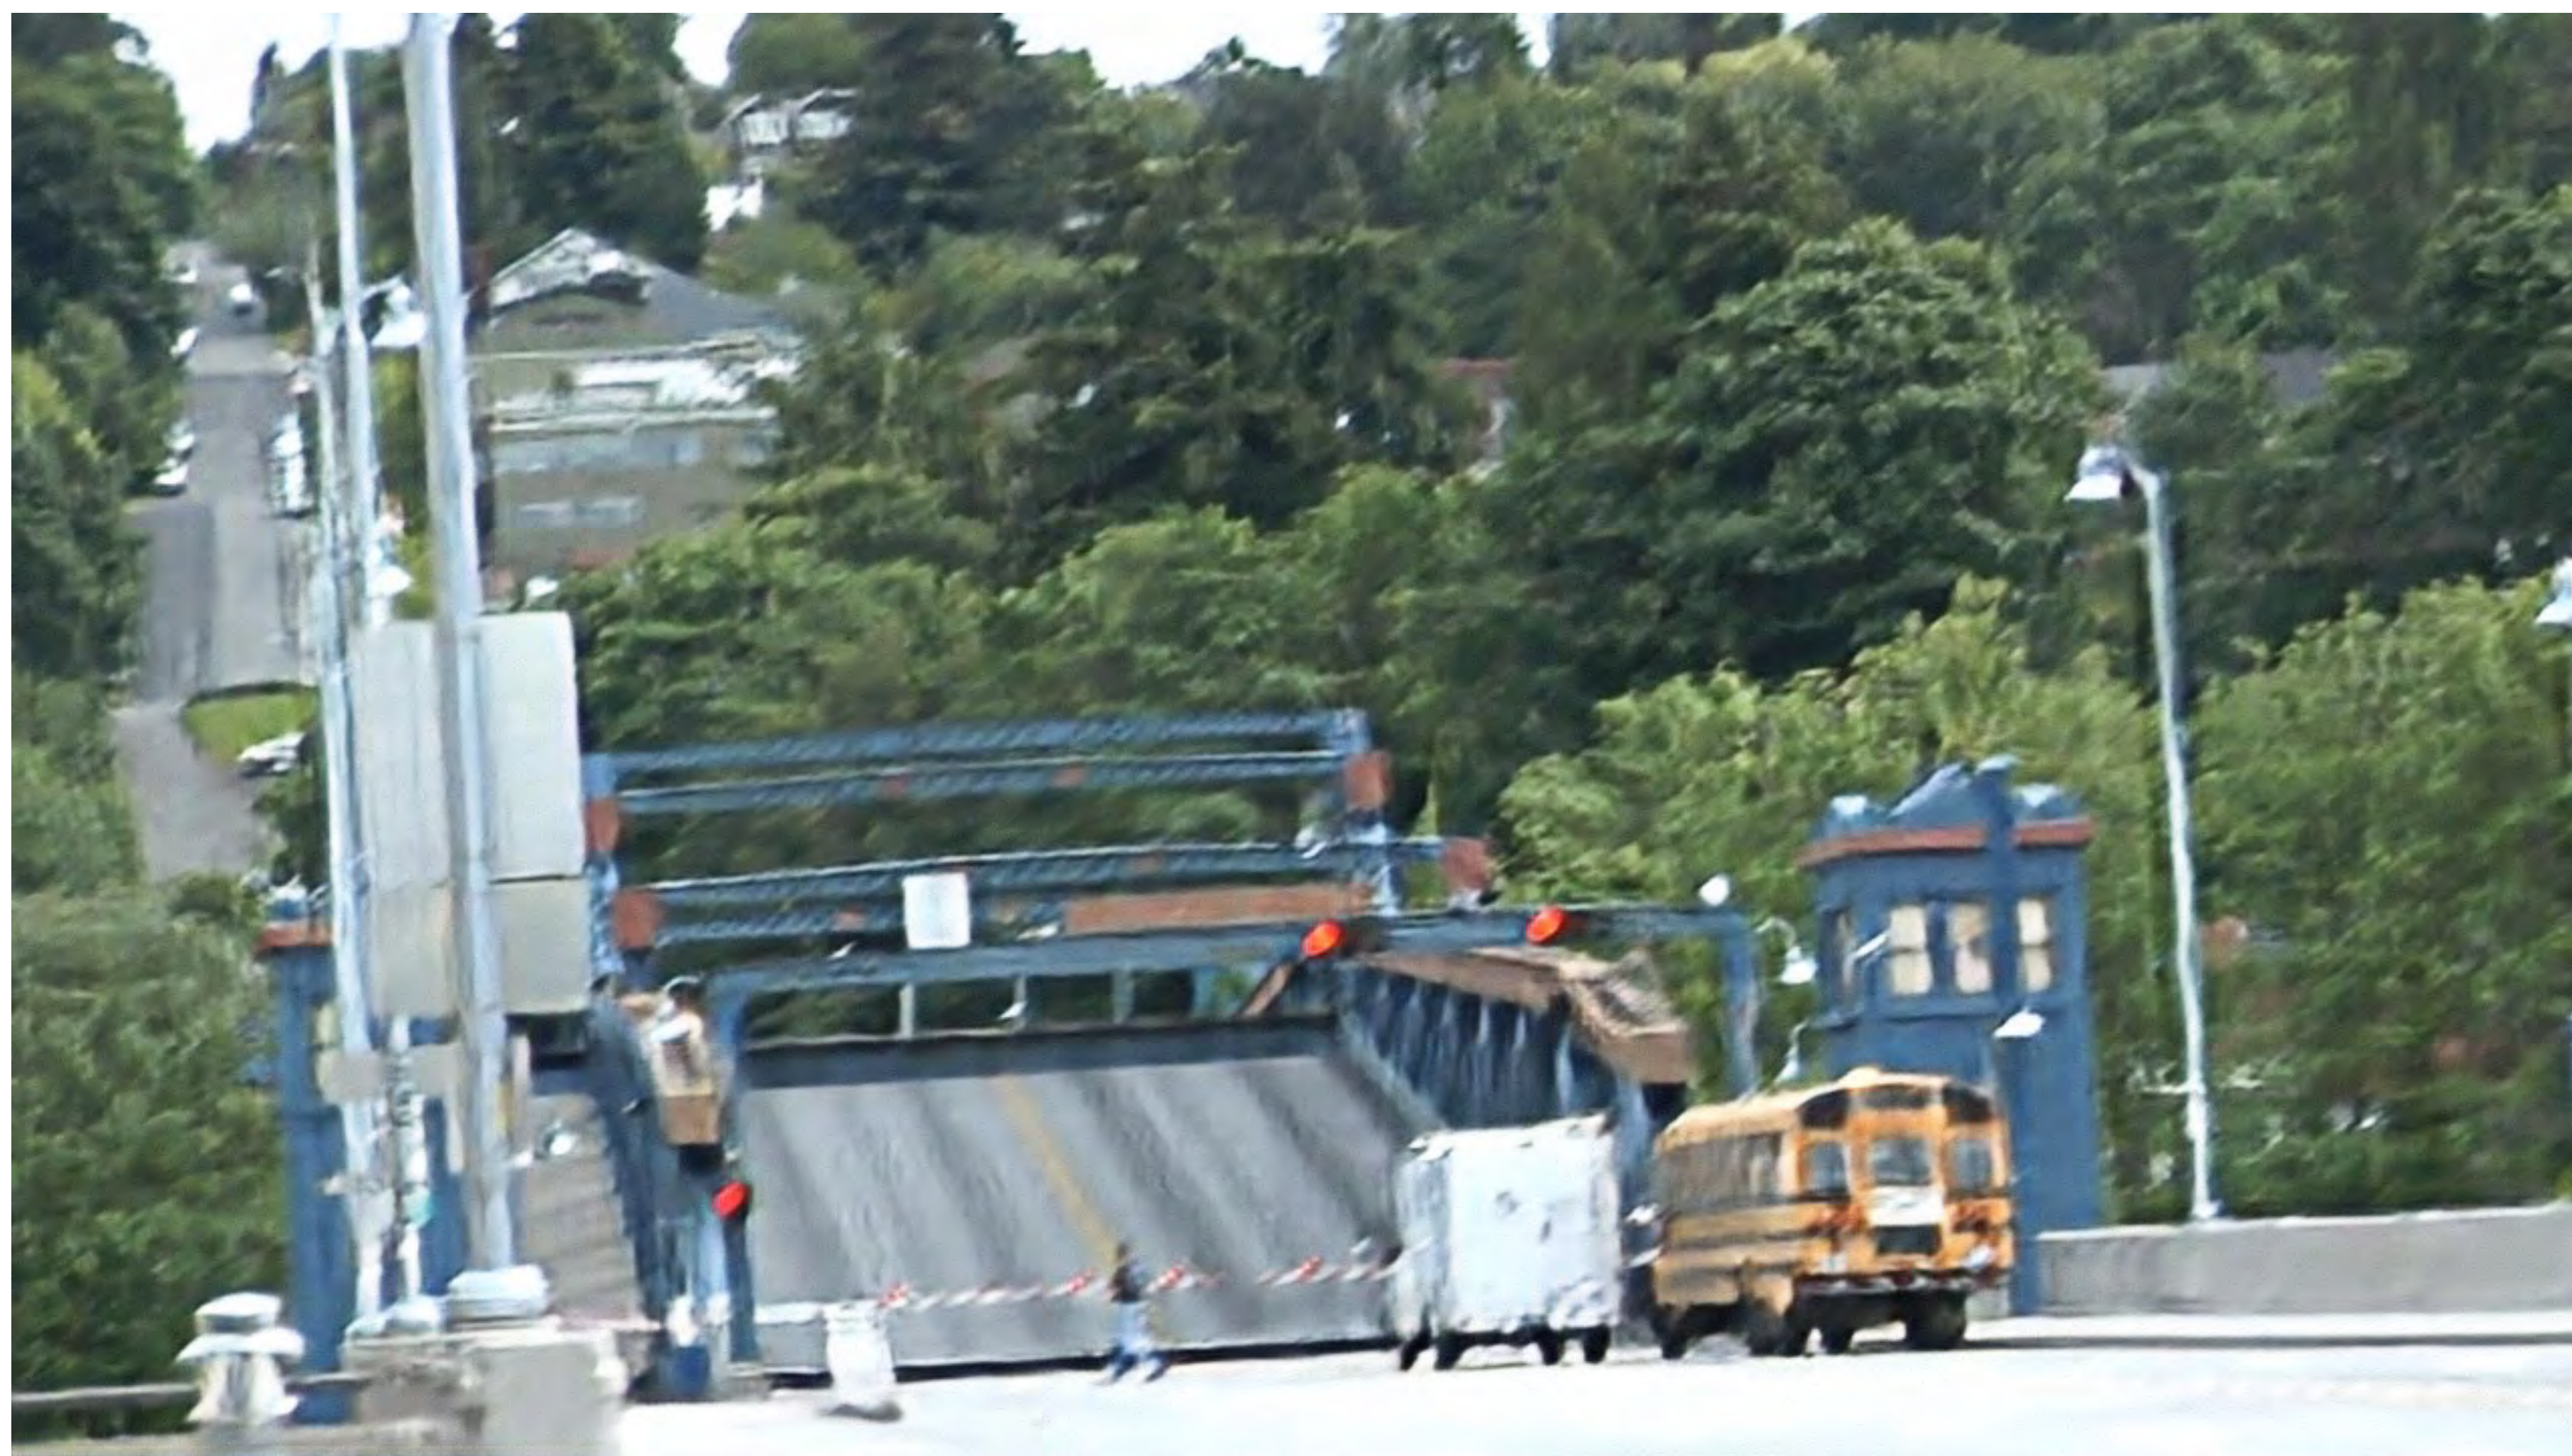

DBN+Noalign



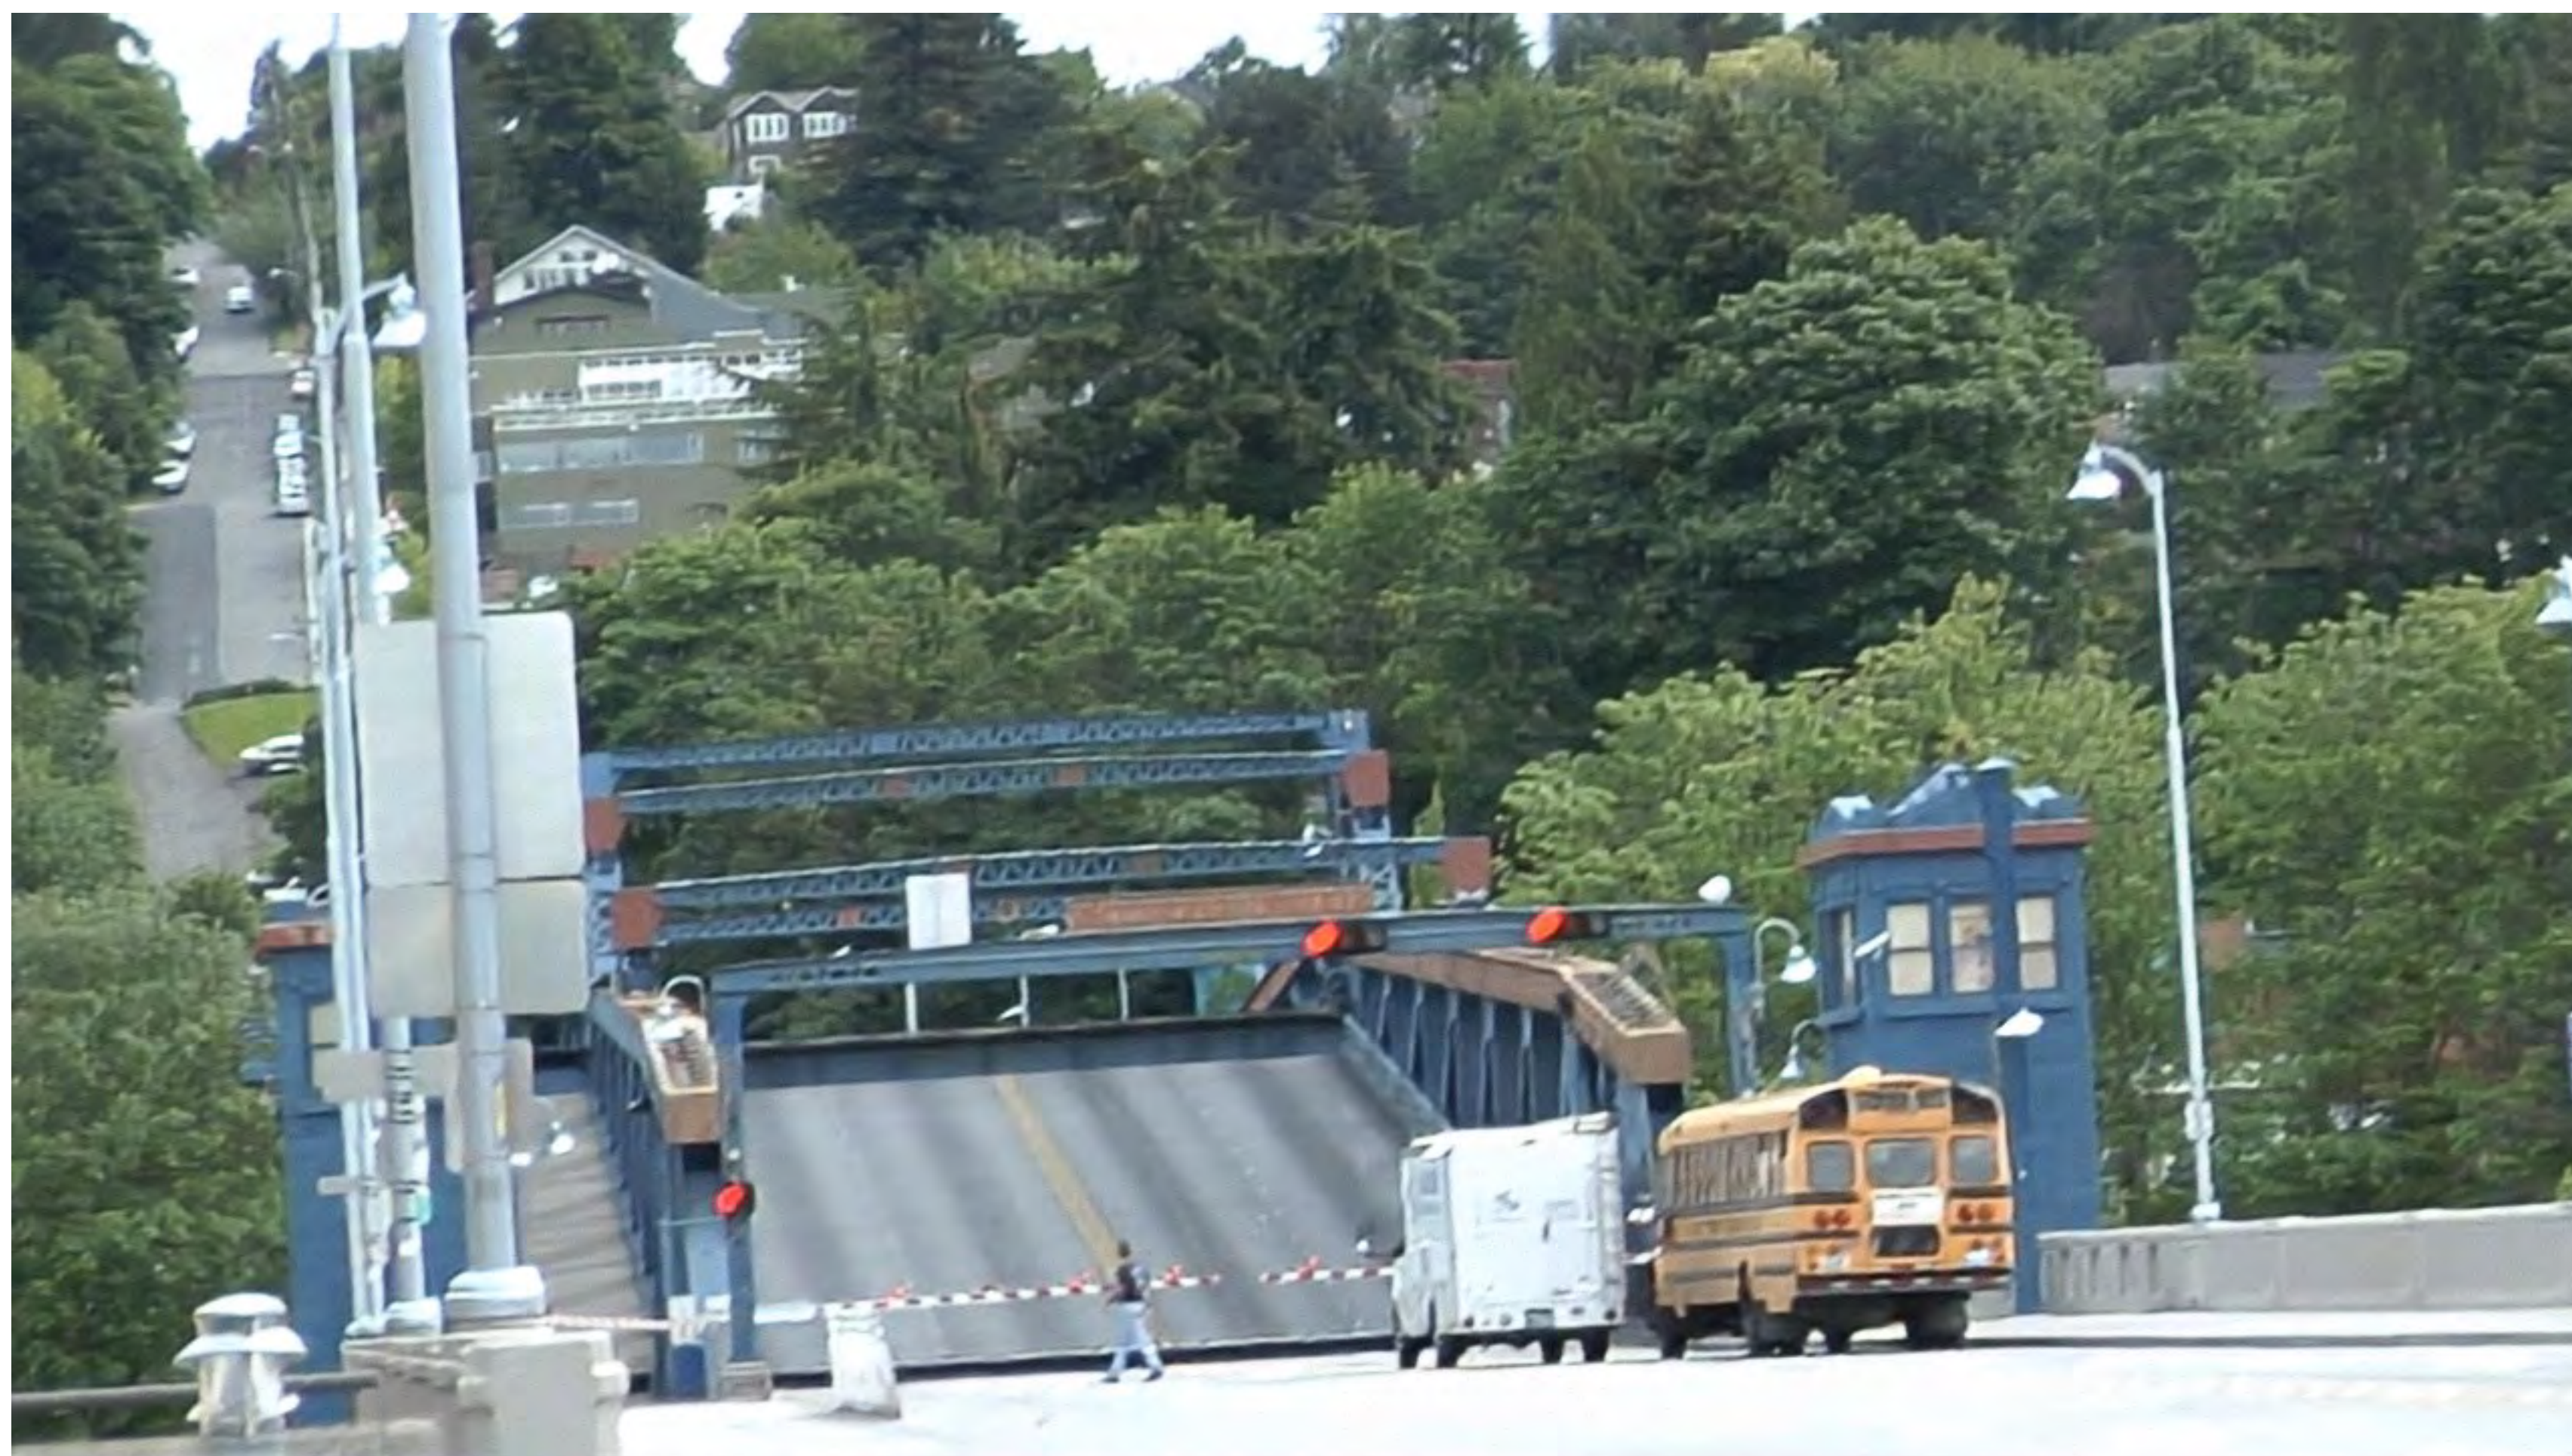

DBN+Homog



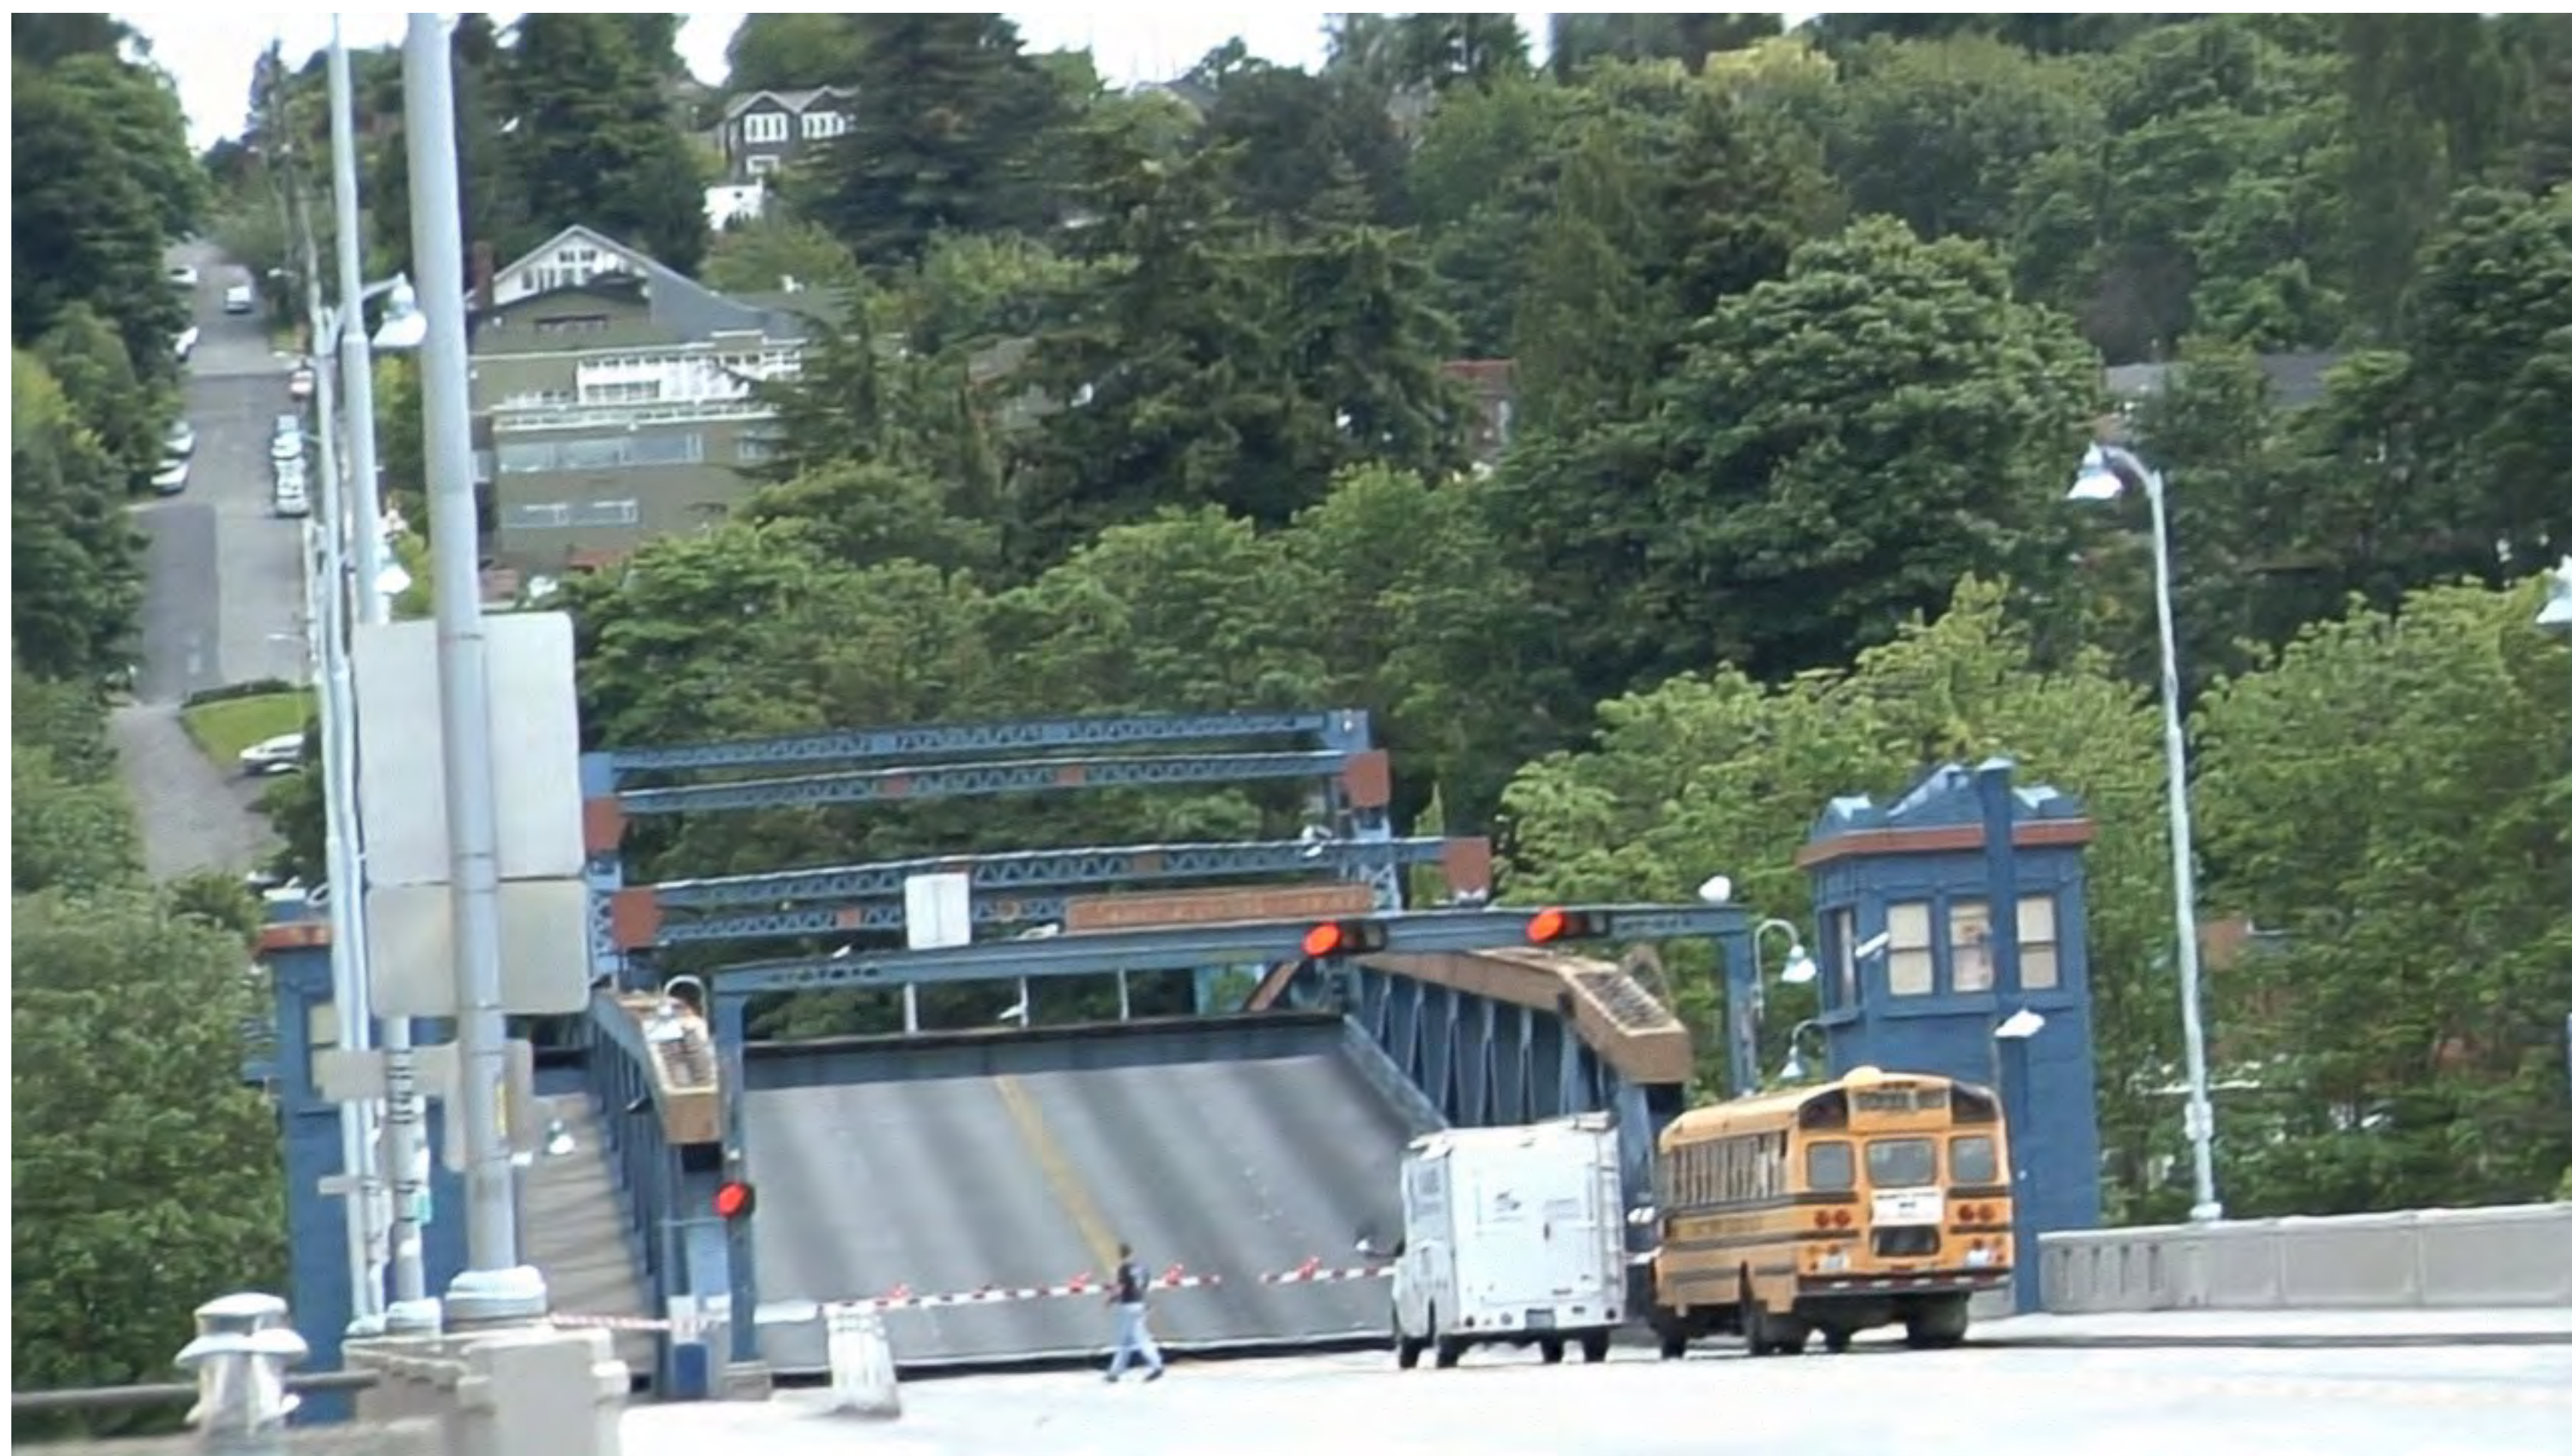

DBN+Flow



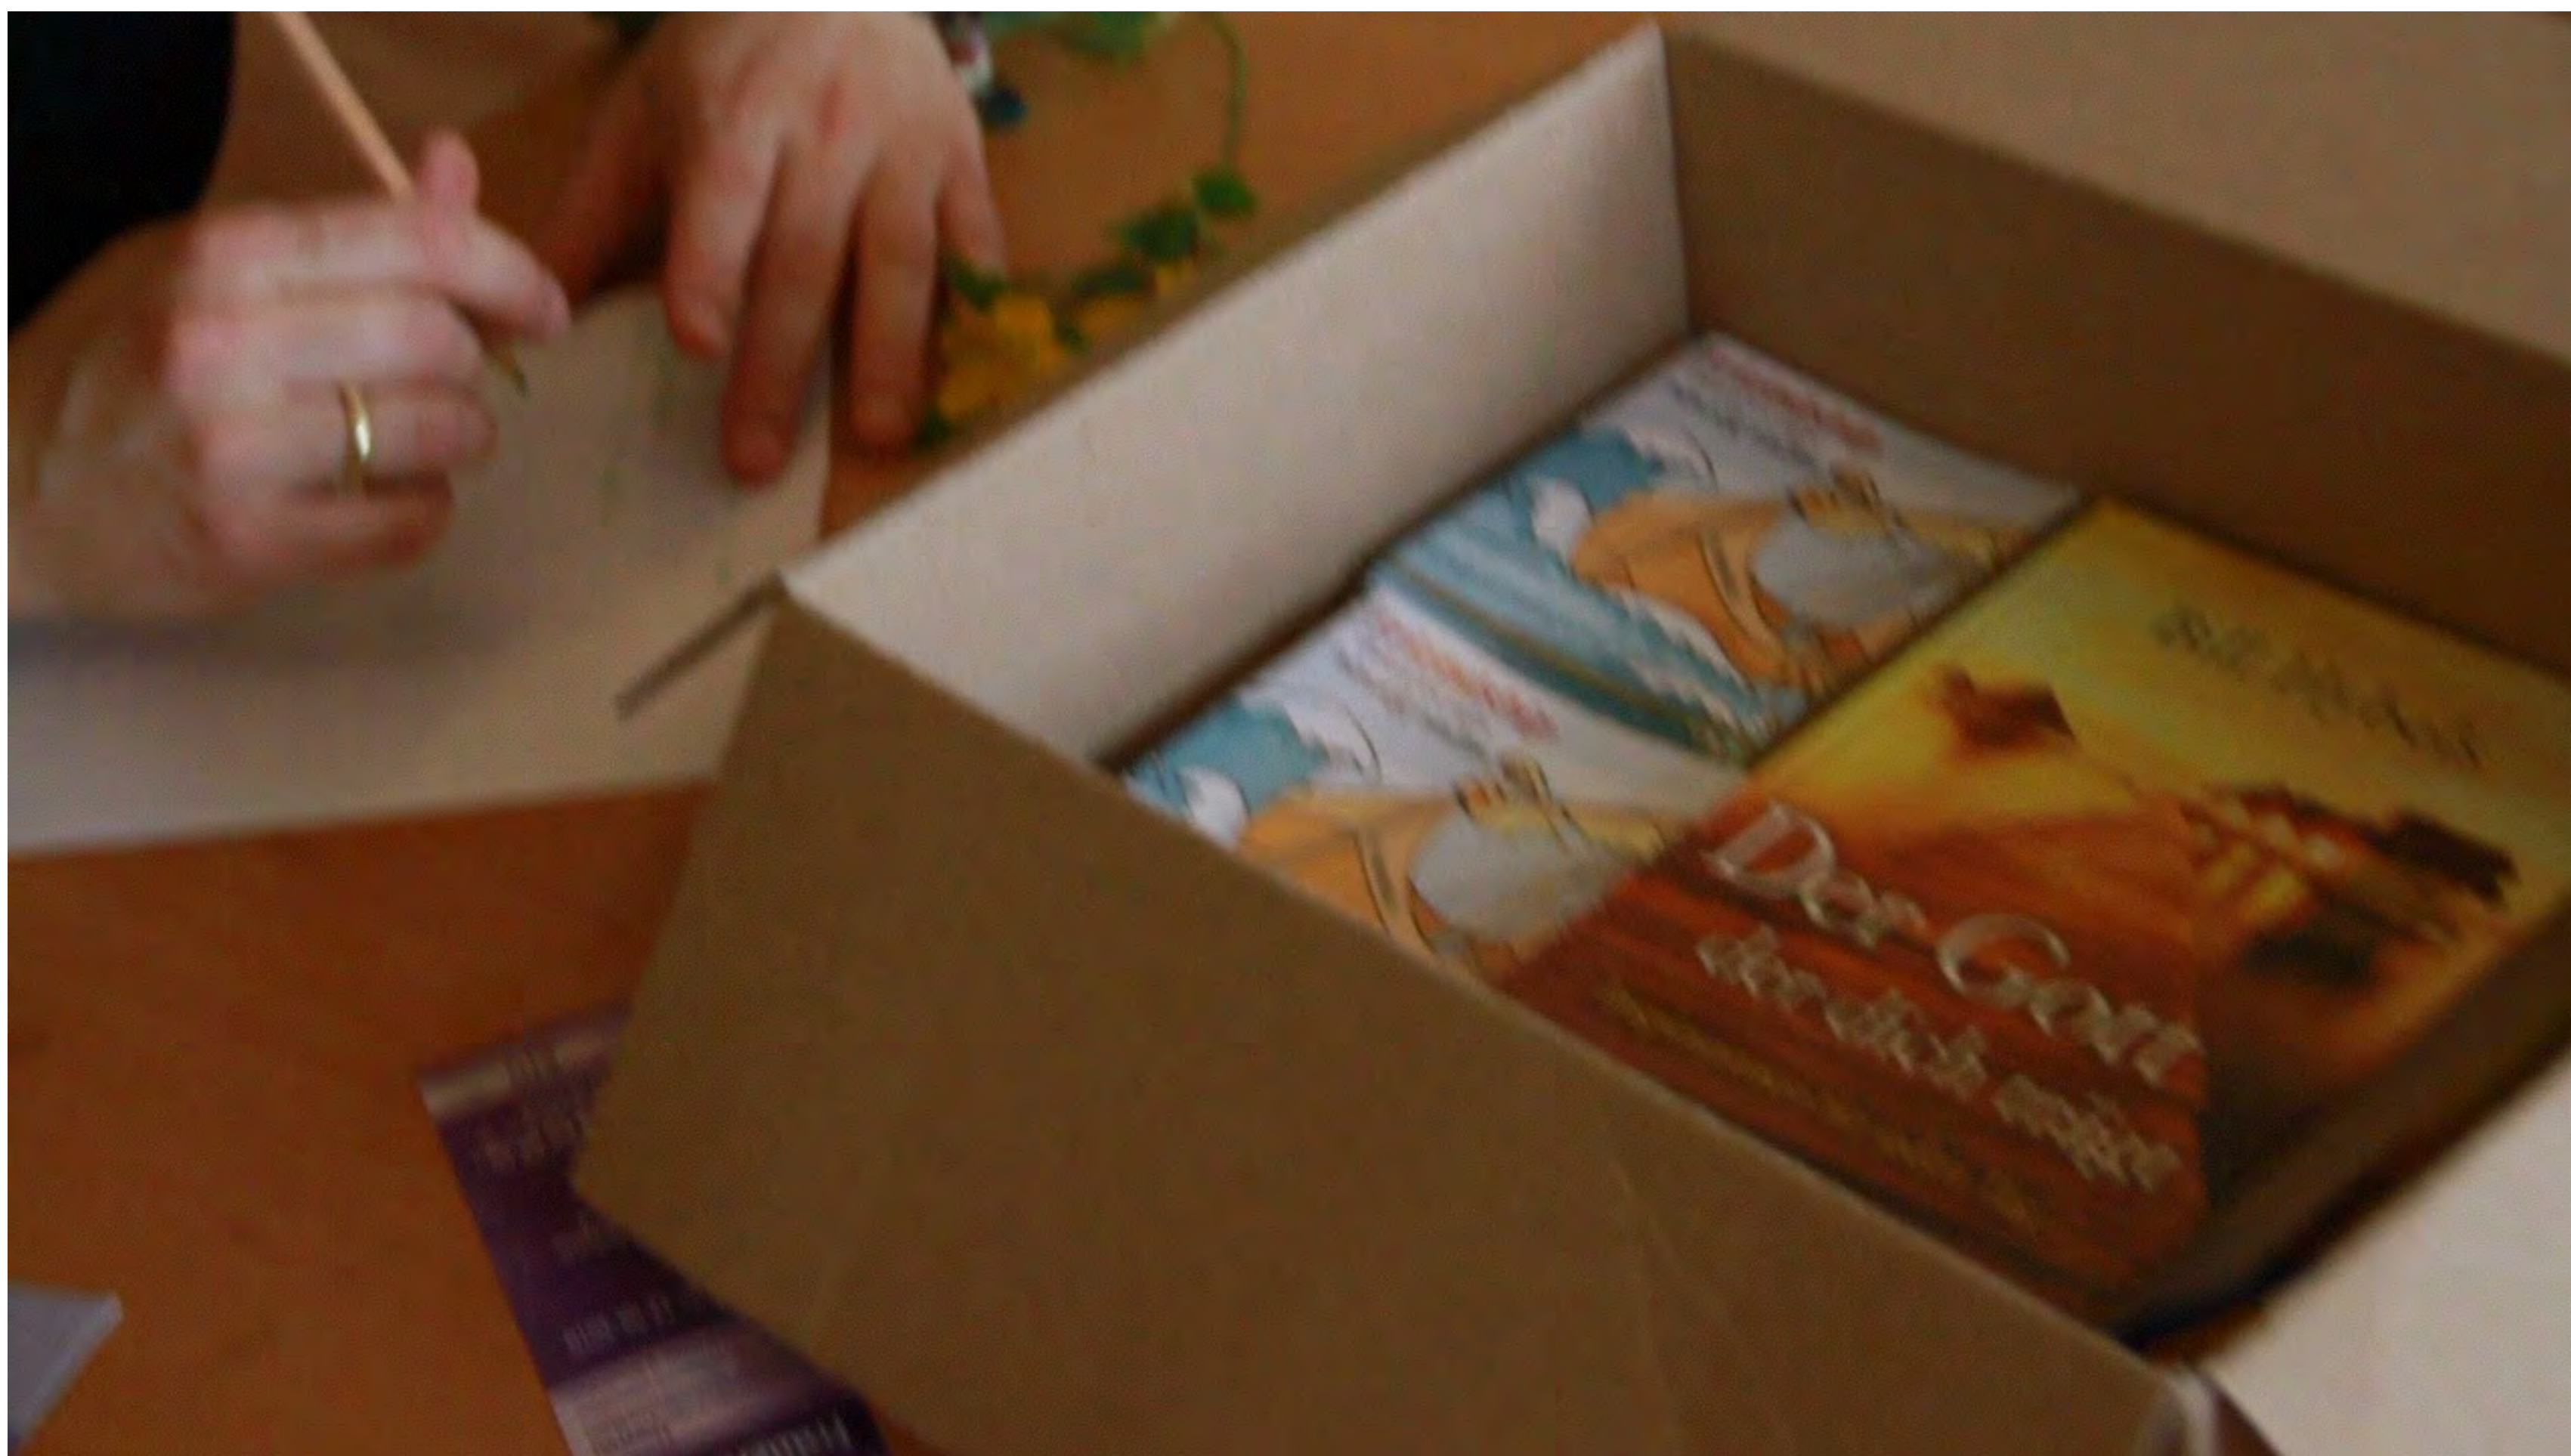

input



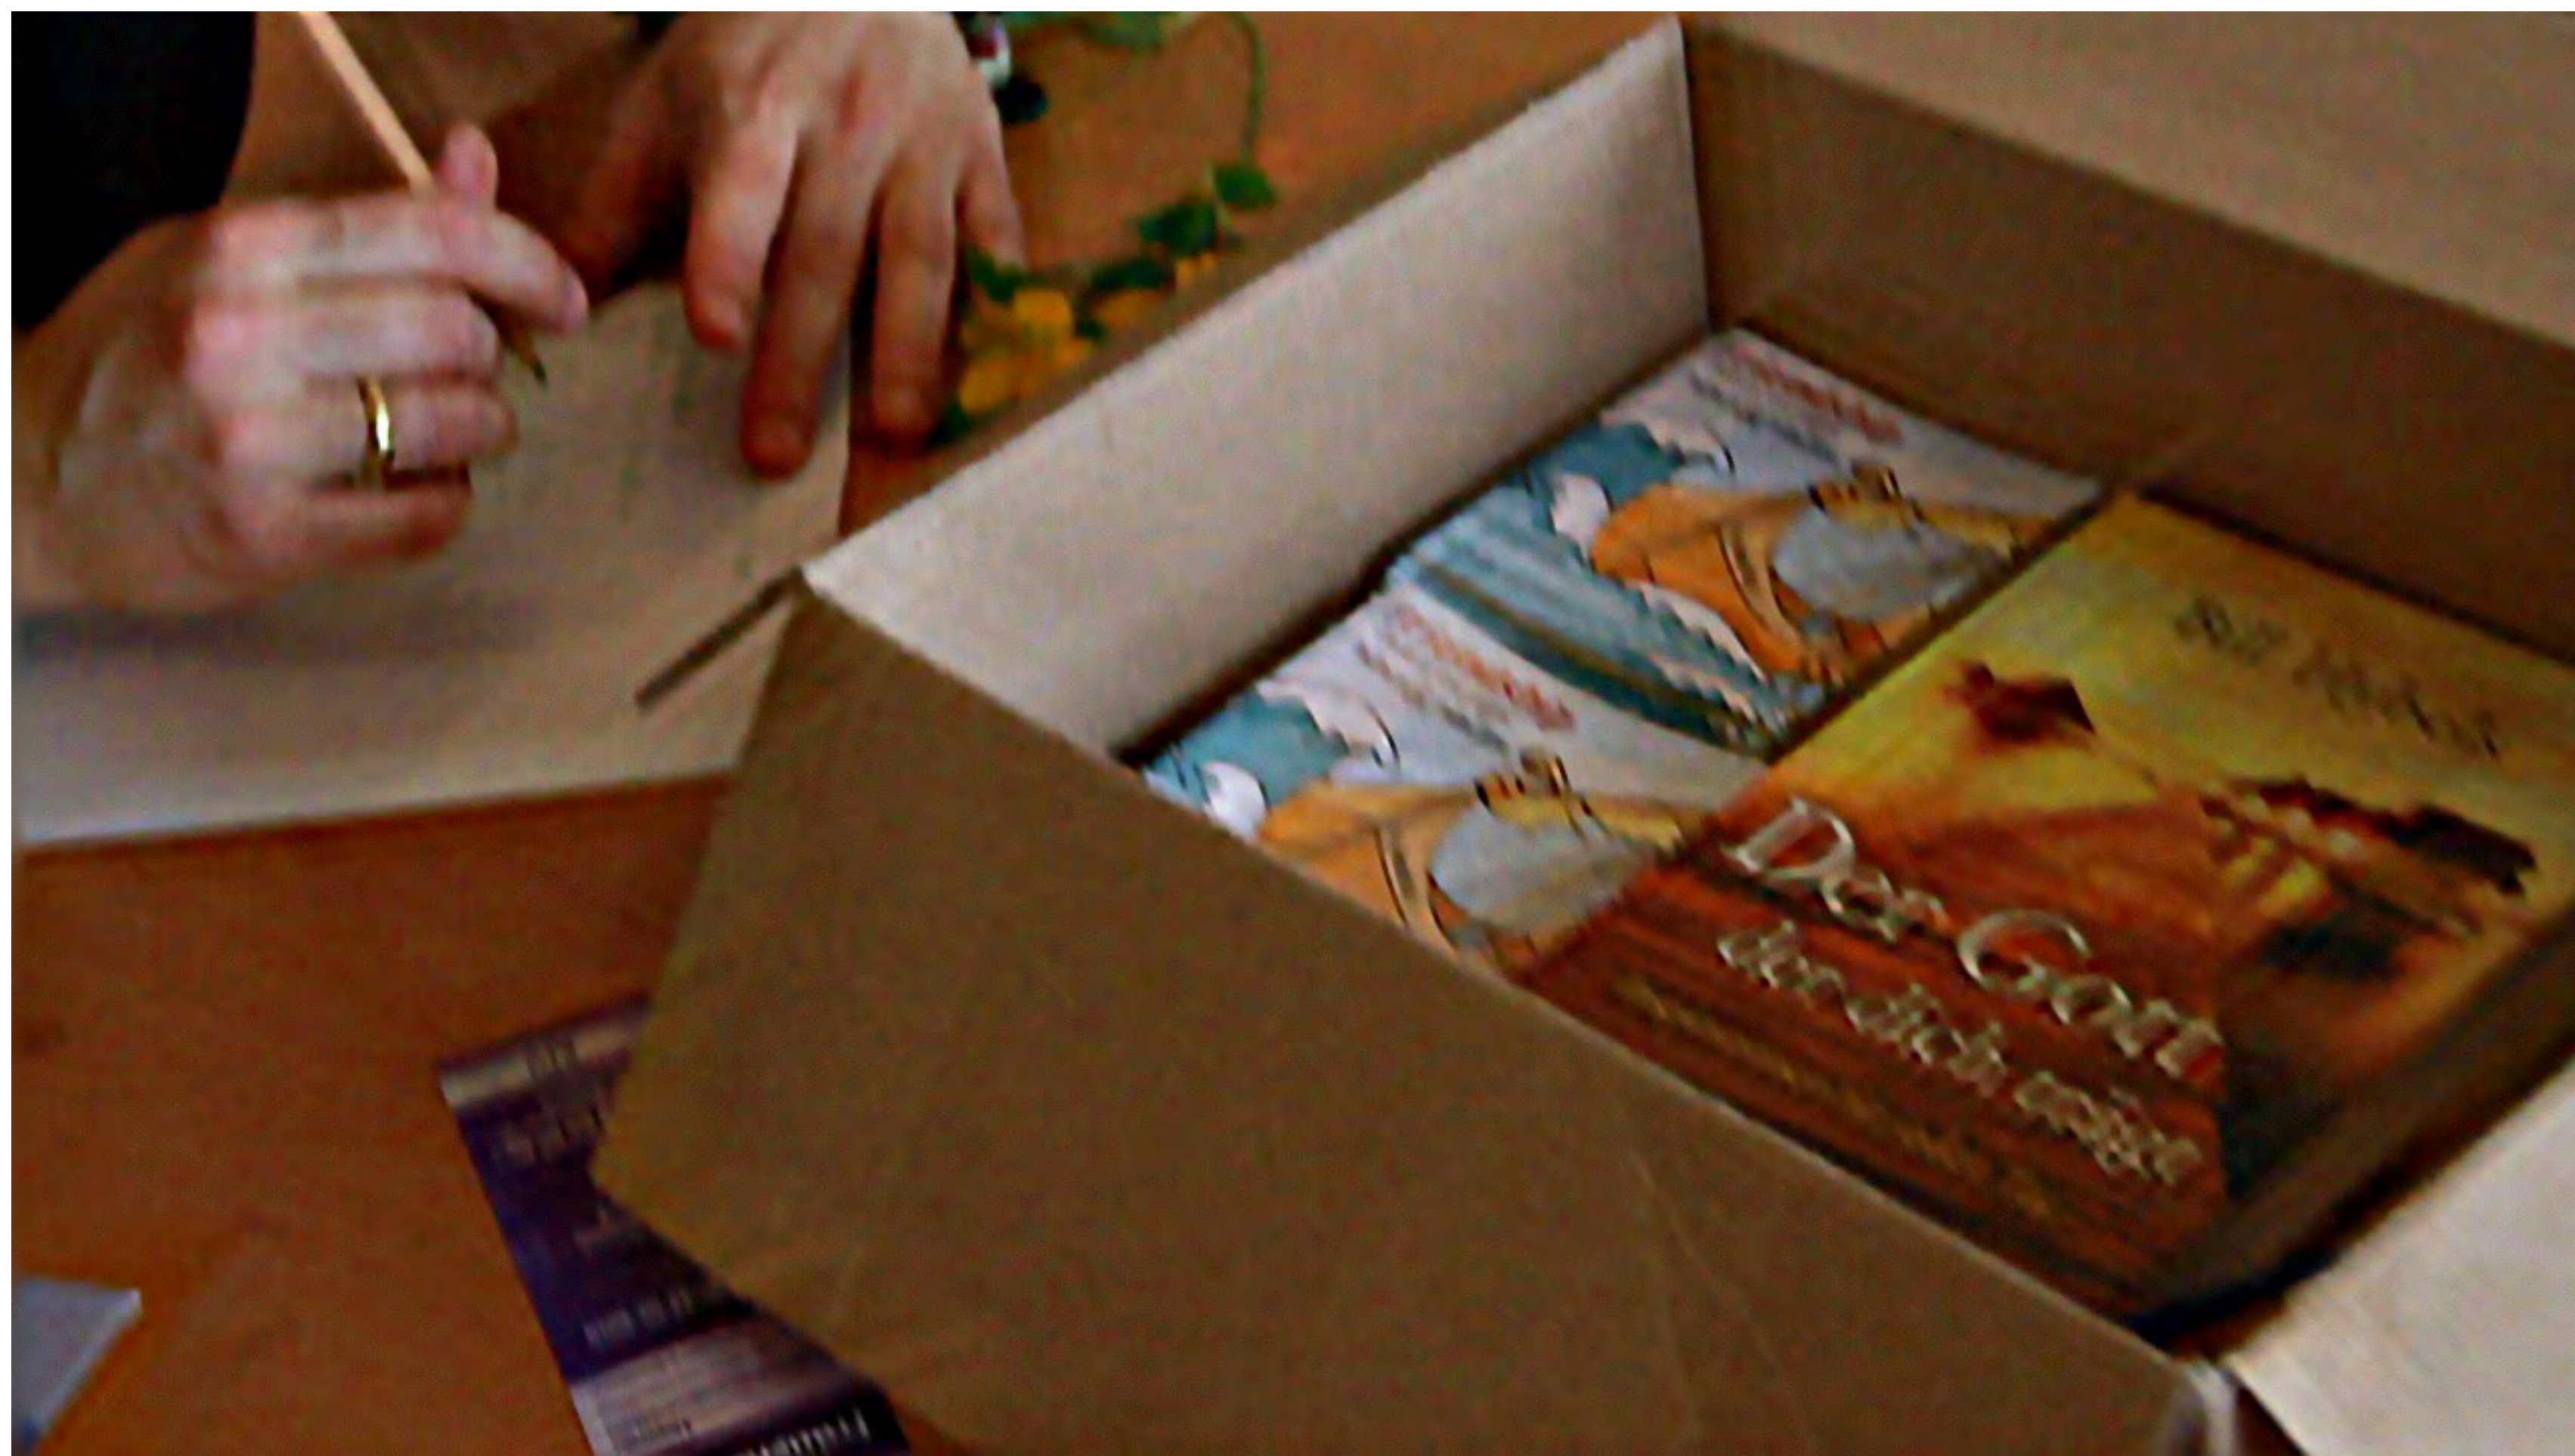

PSDeblur



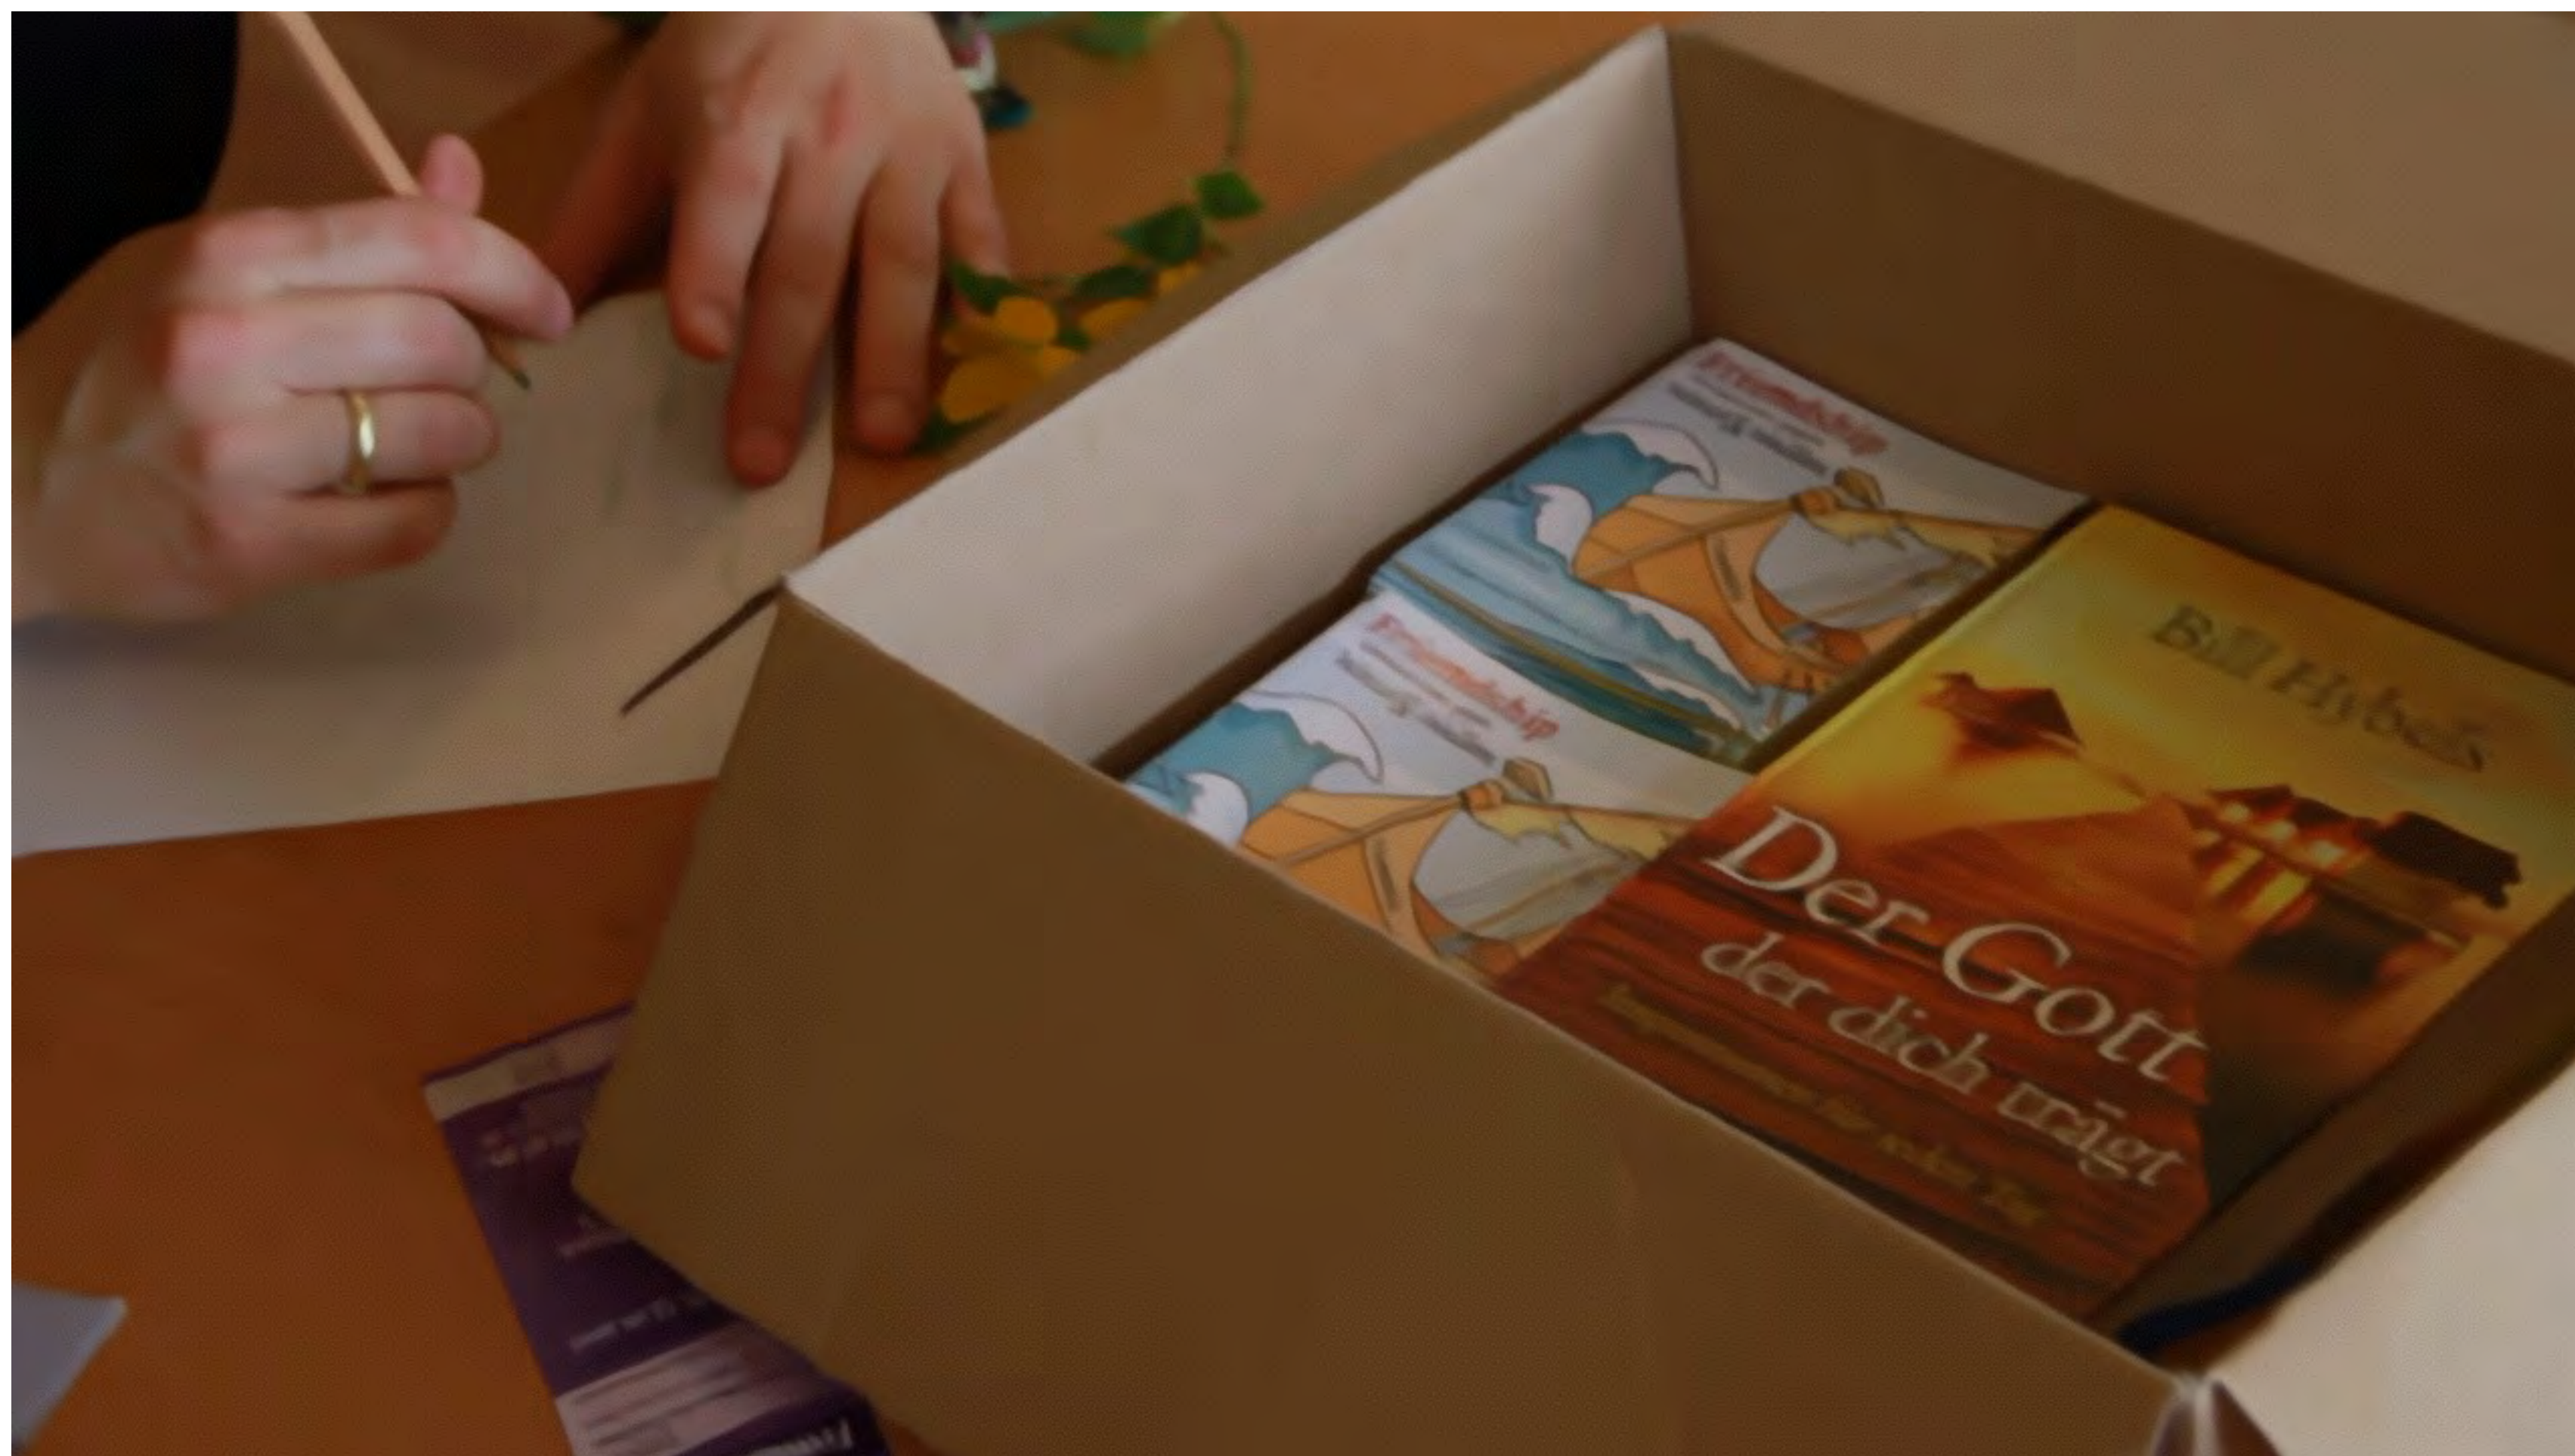

Cho [3]



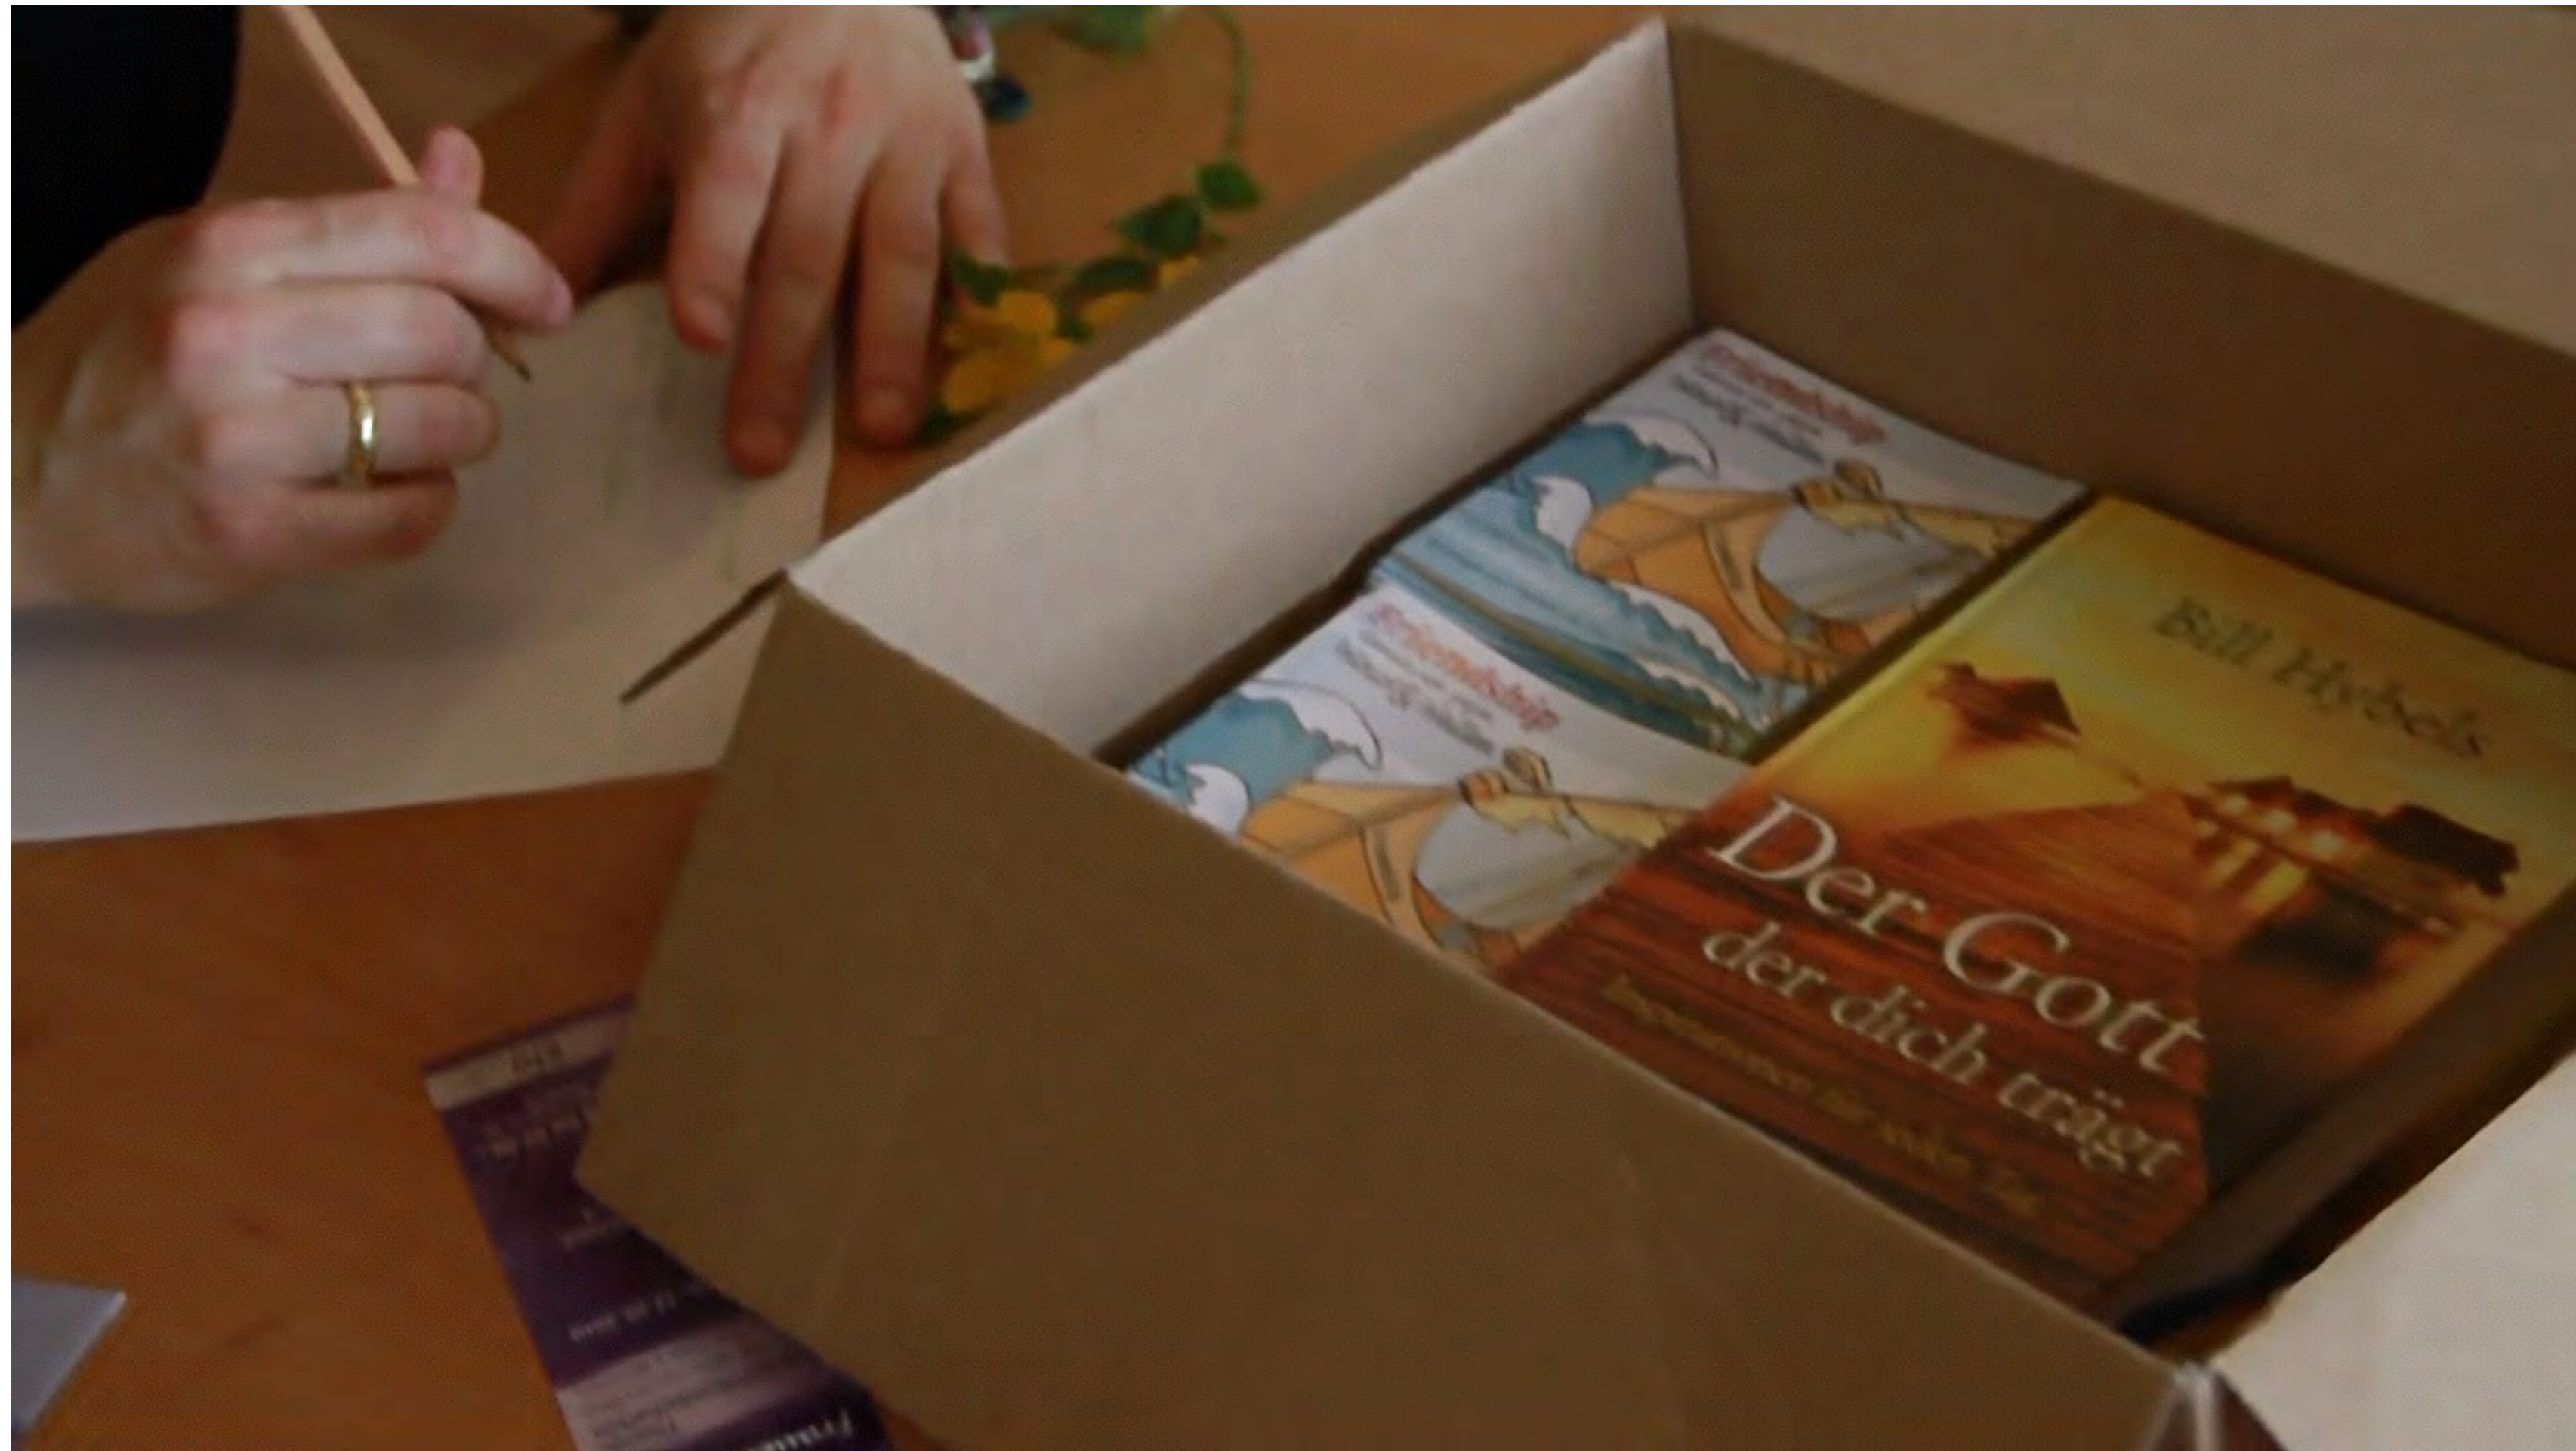

Kim and Lee [15]



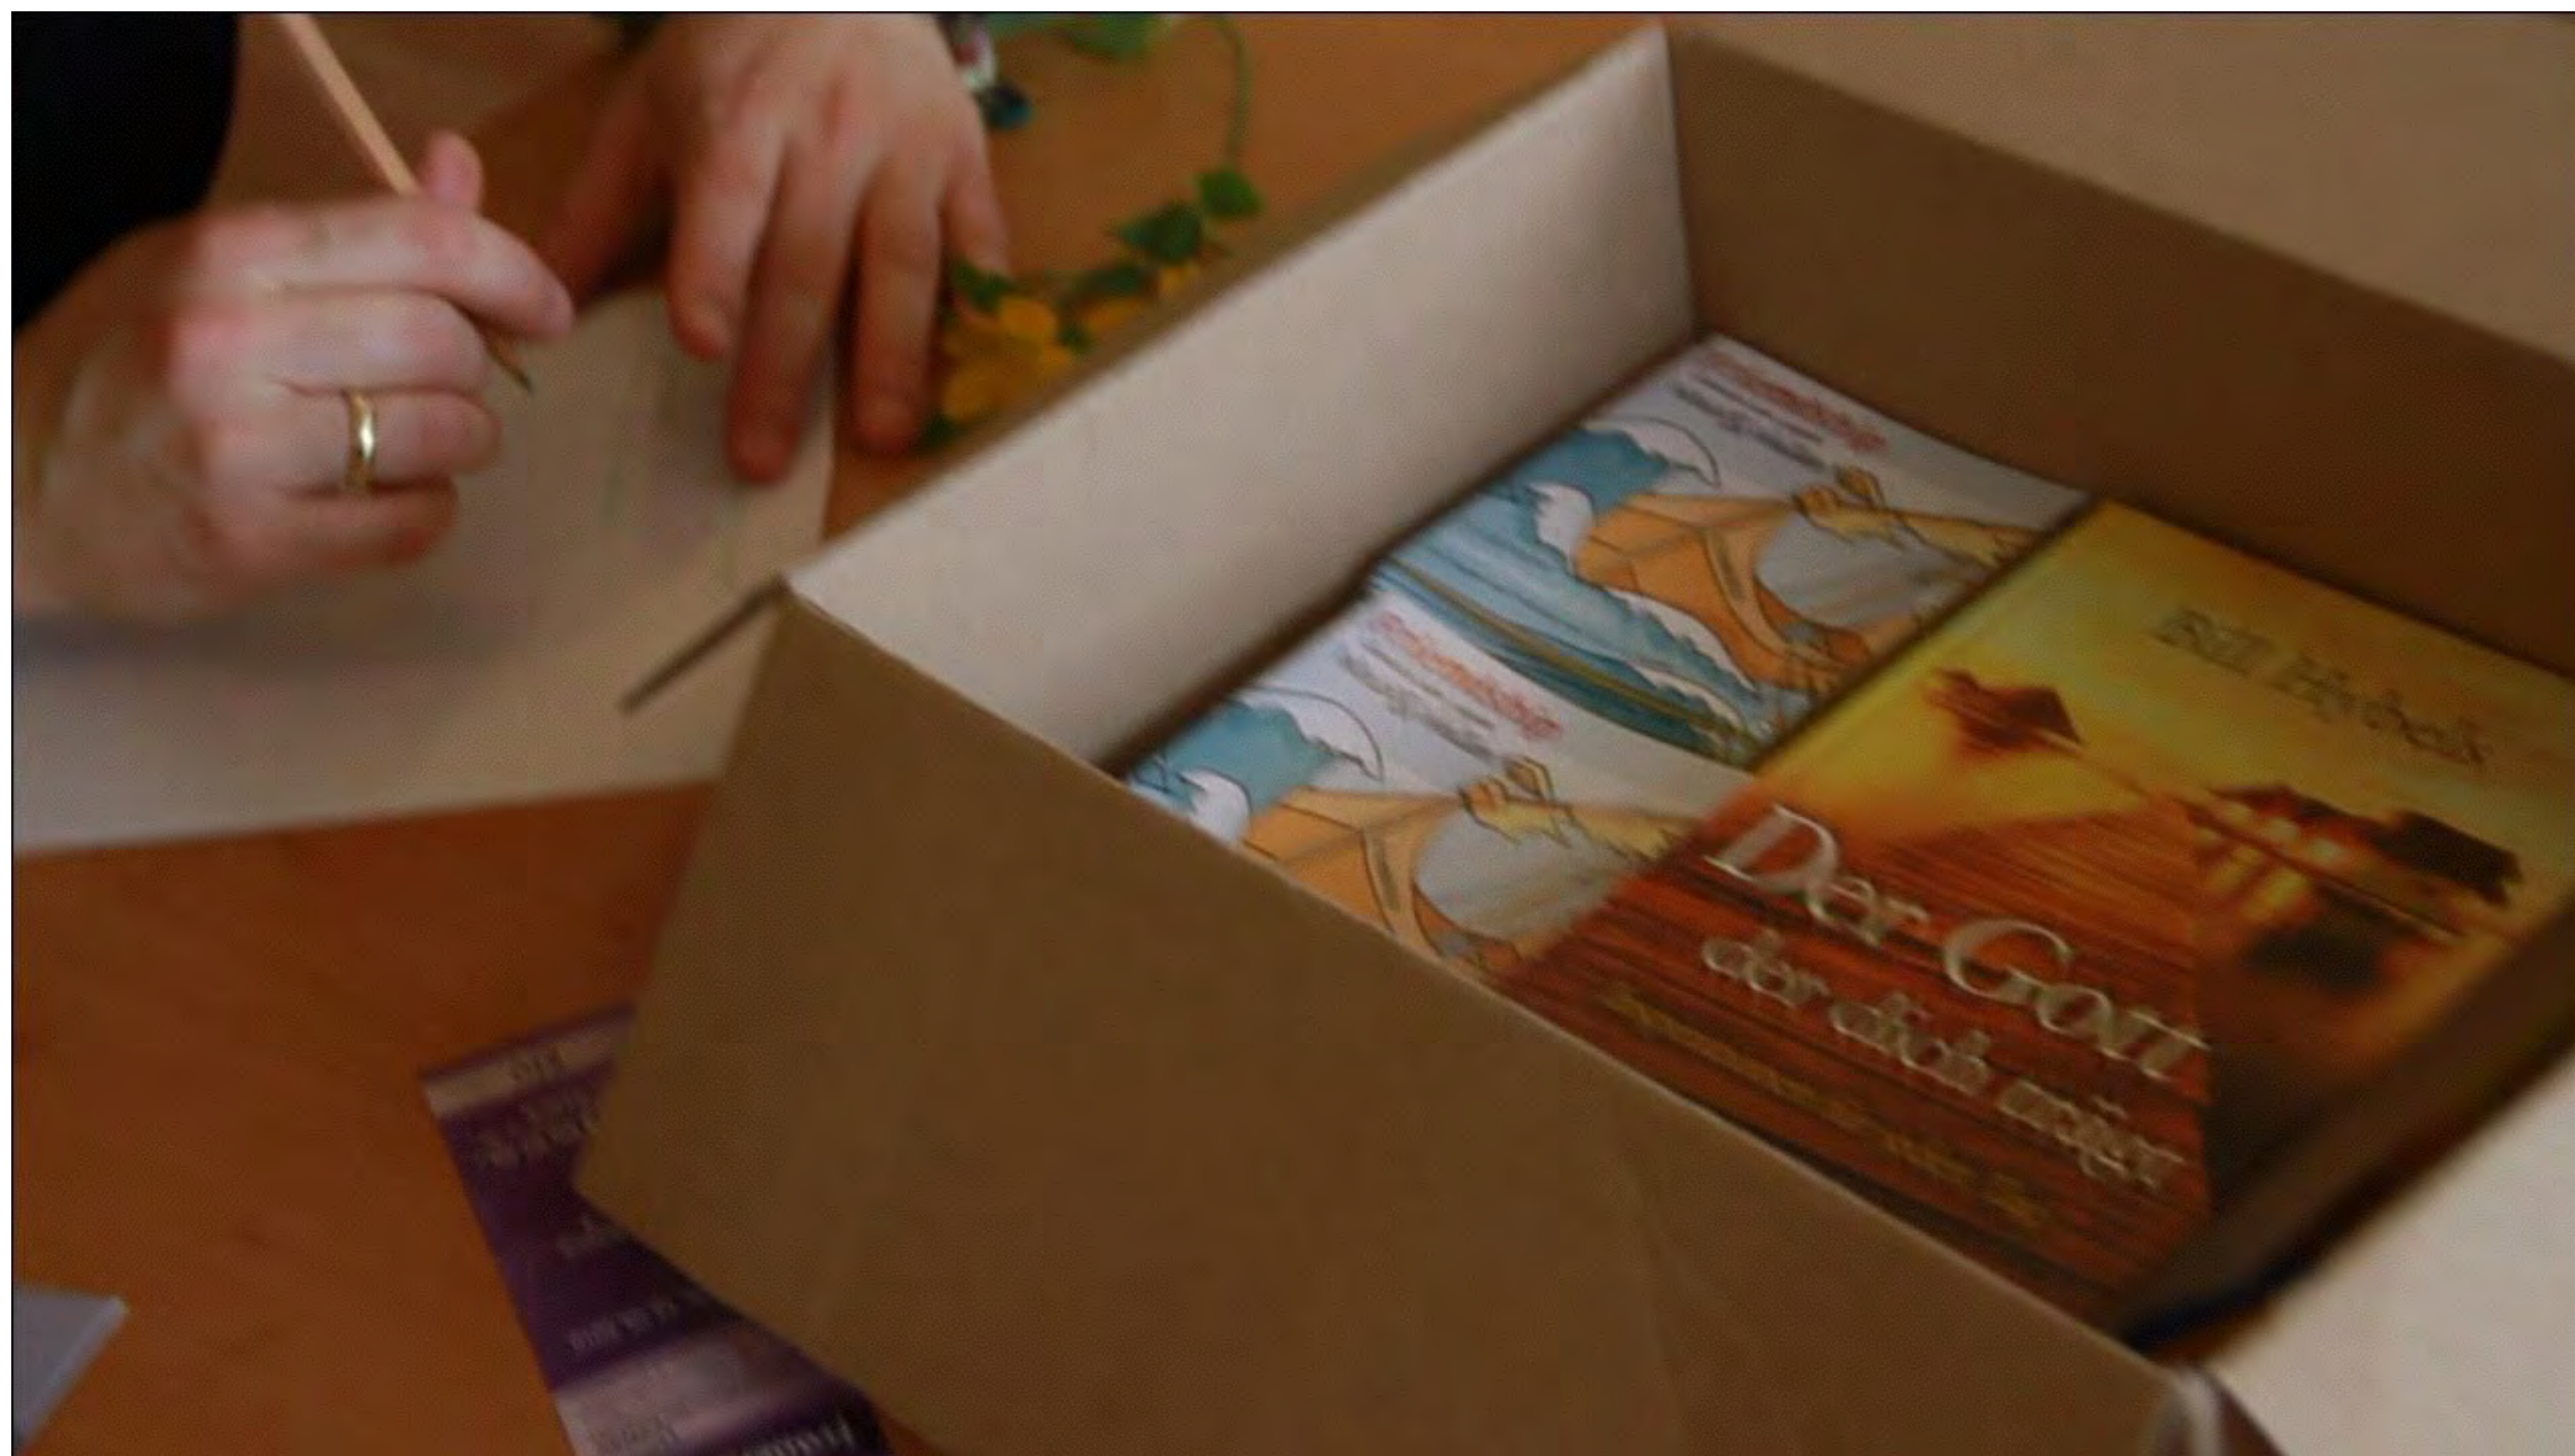

WFA [5]



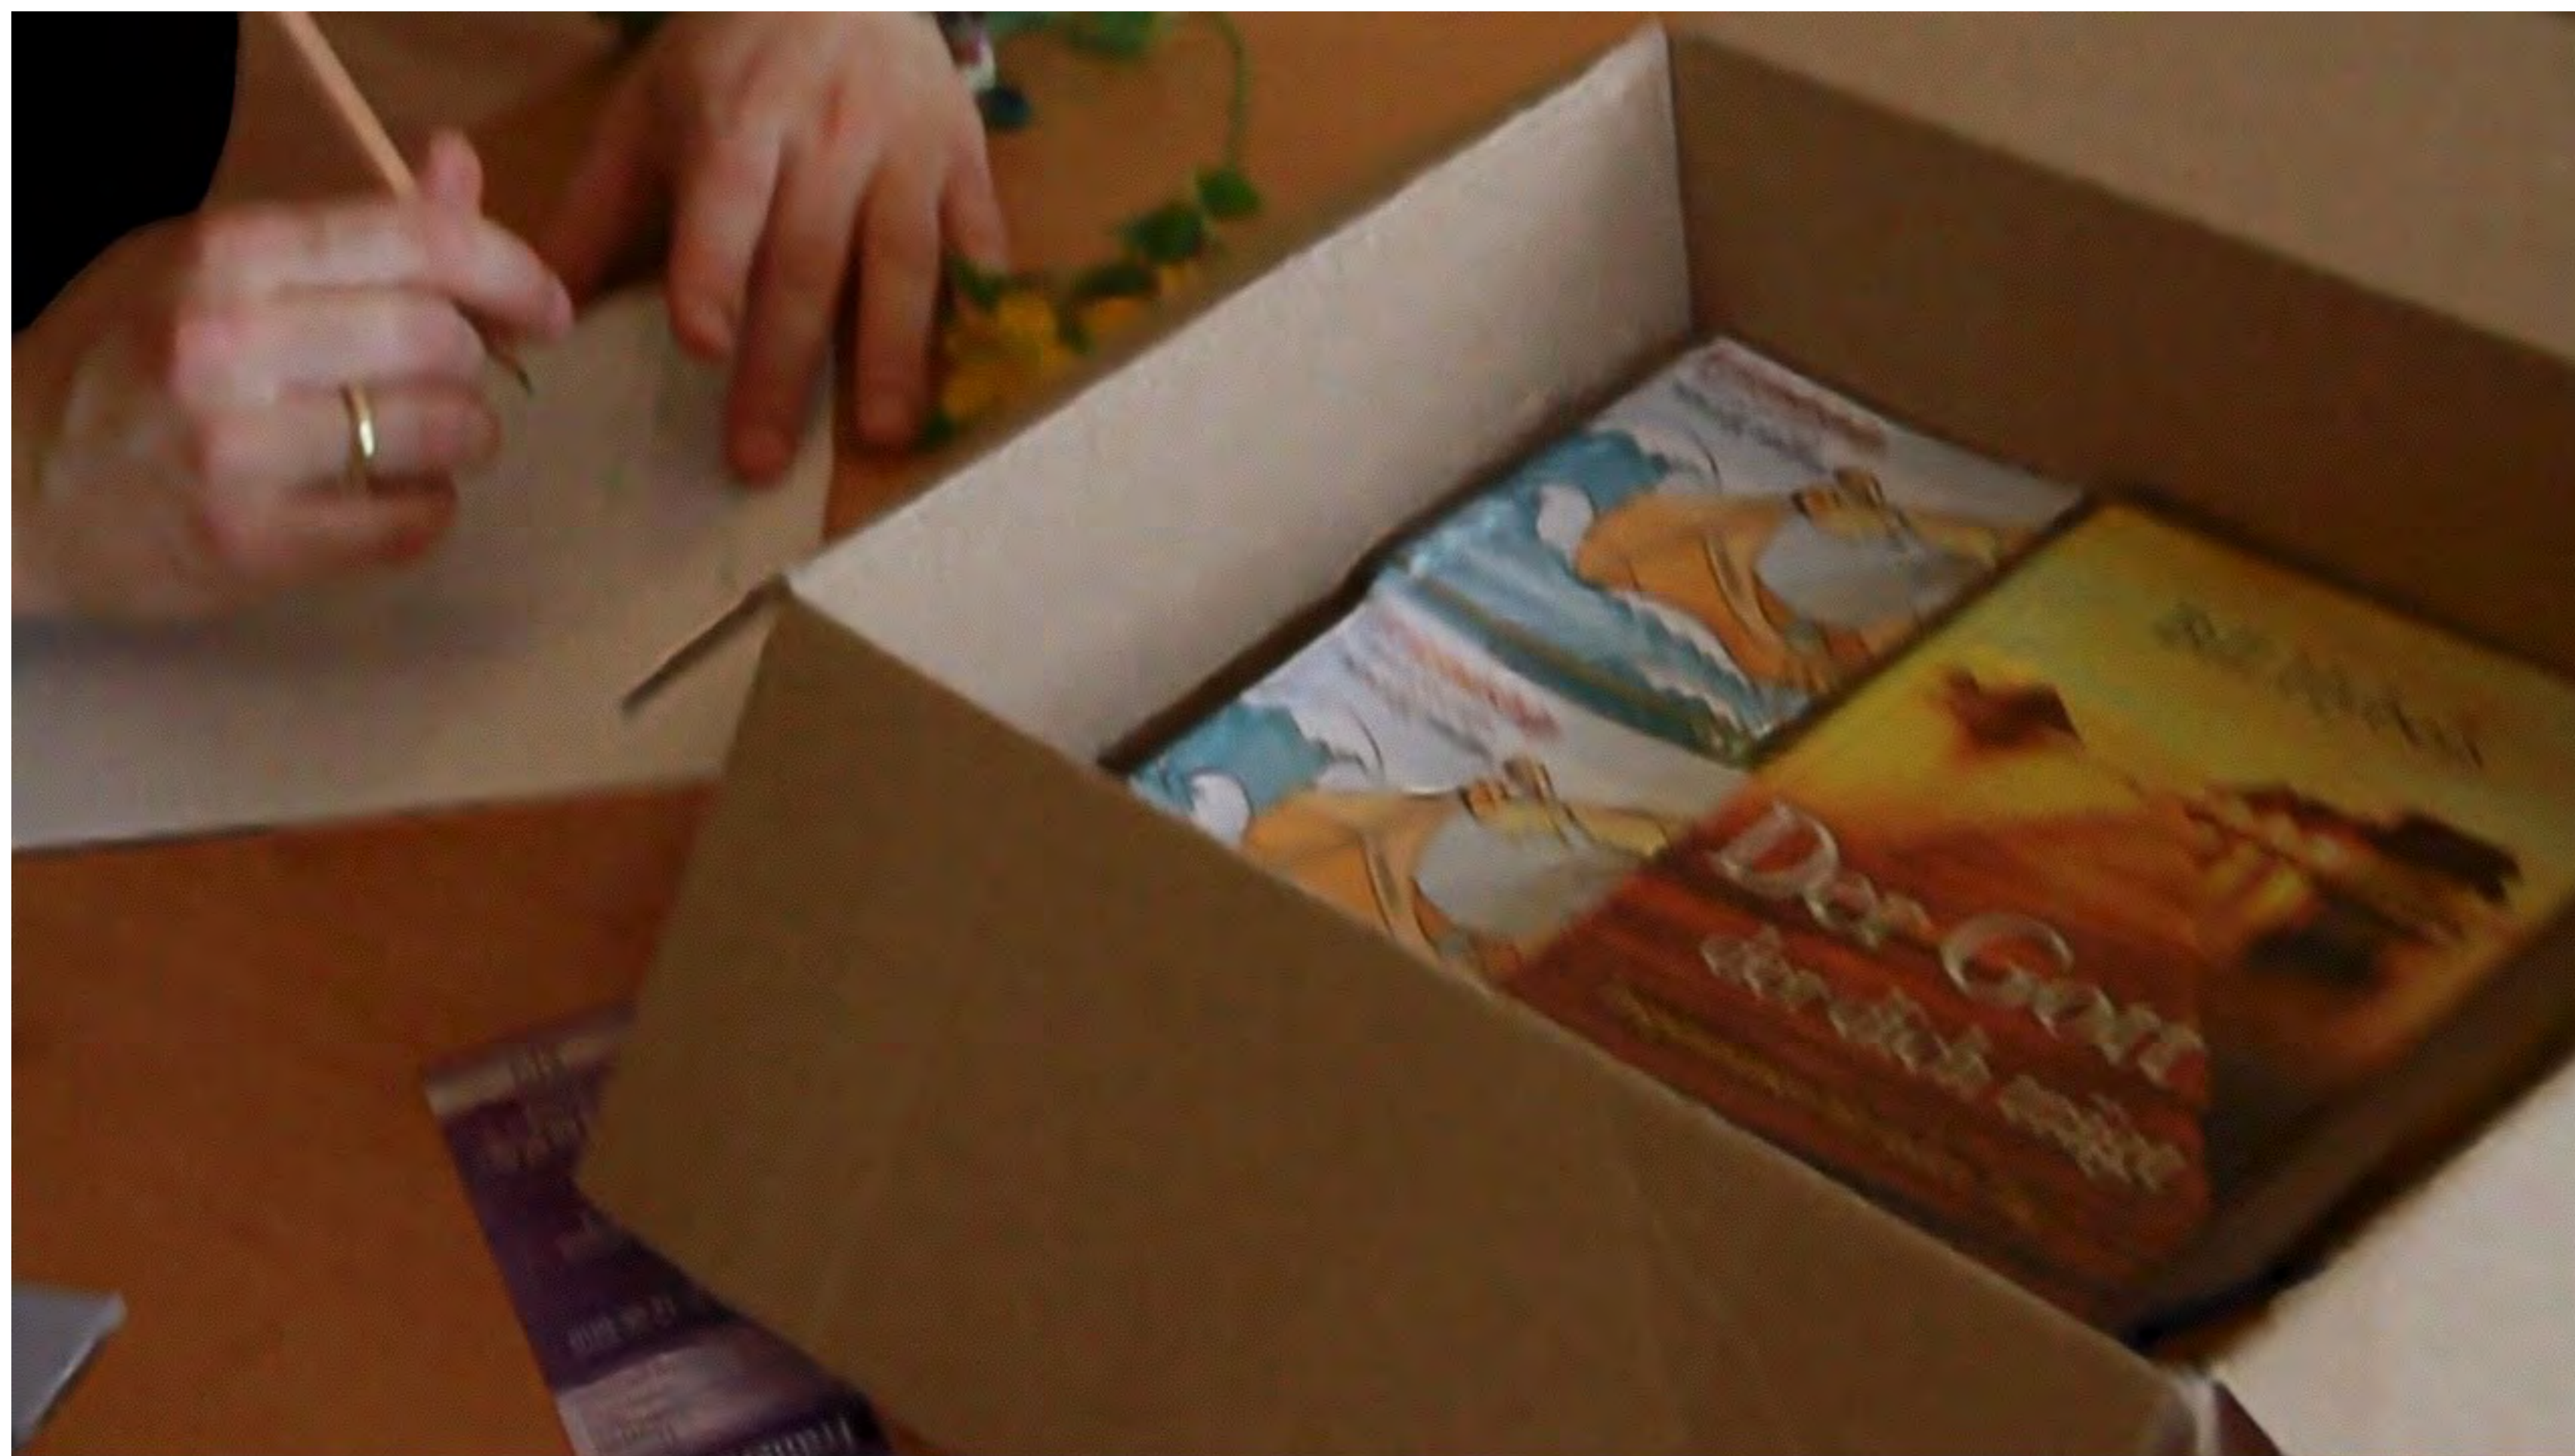

DBN+Single



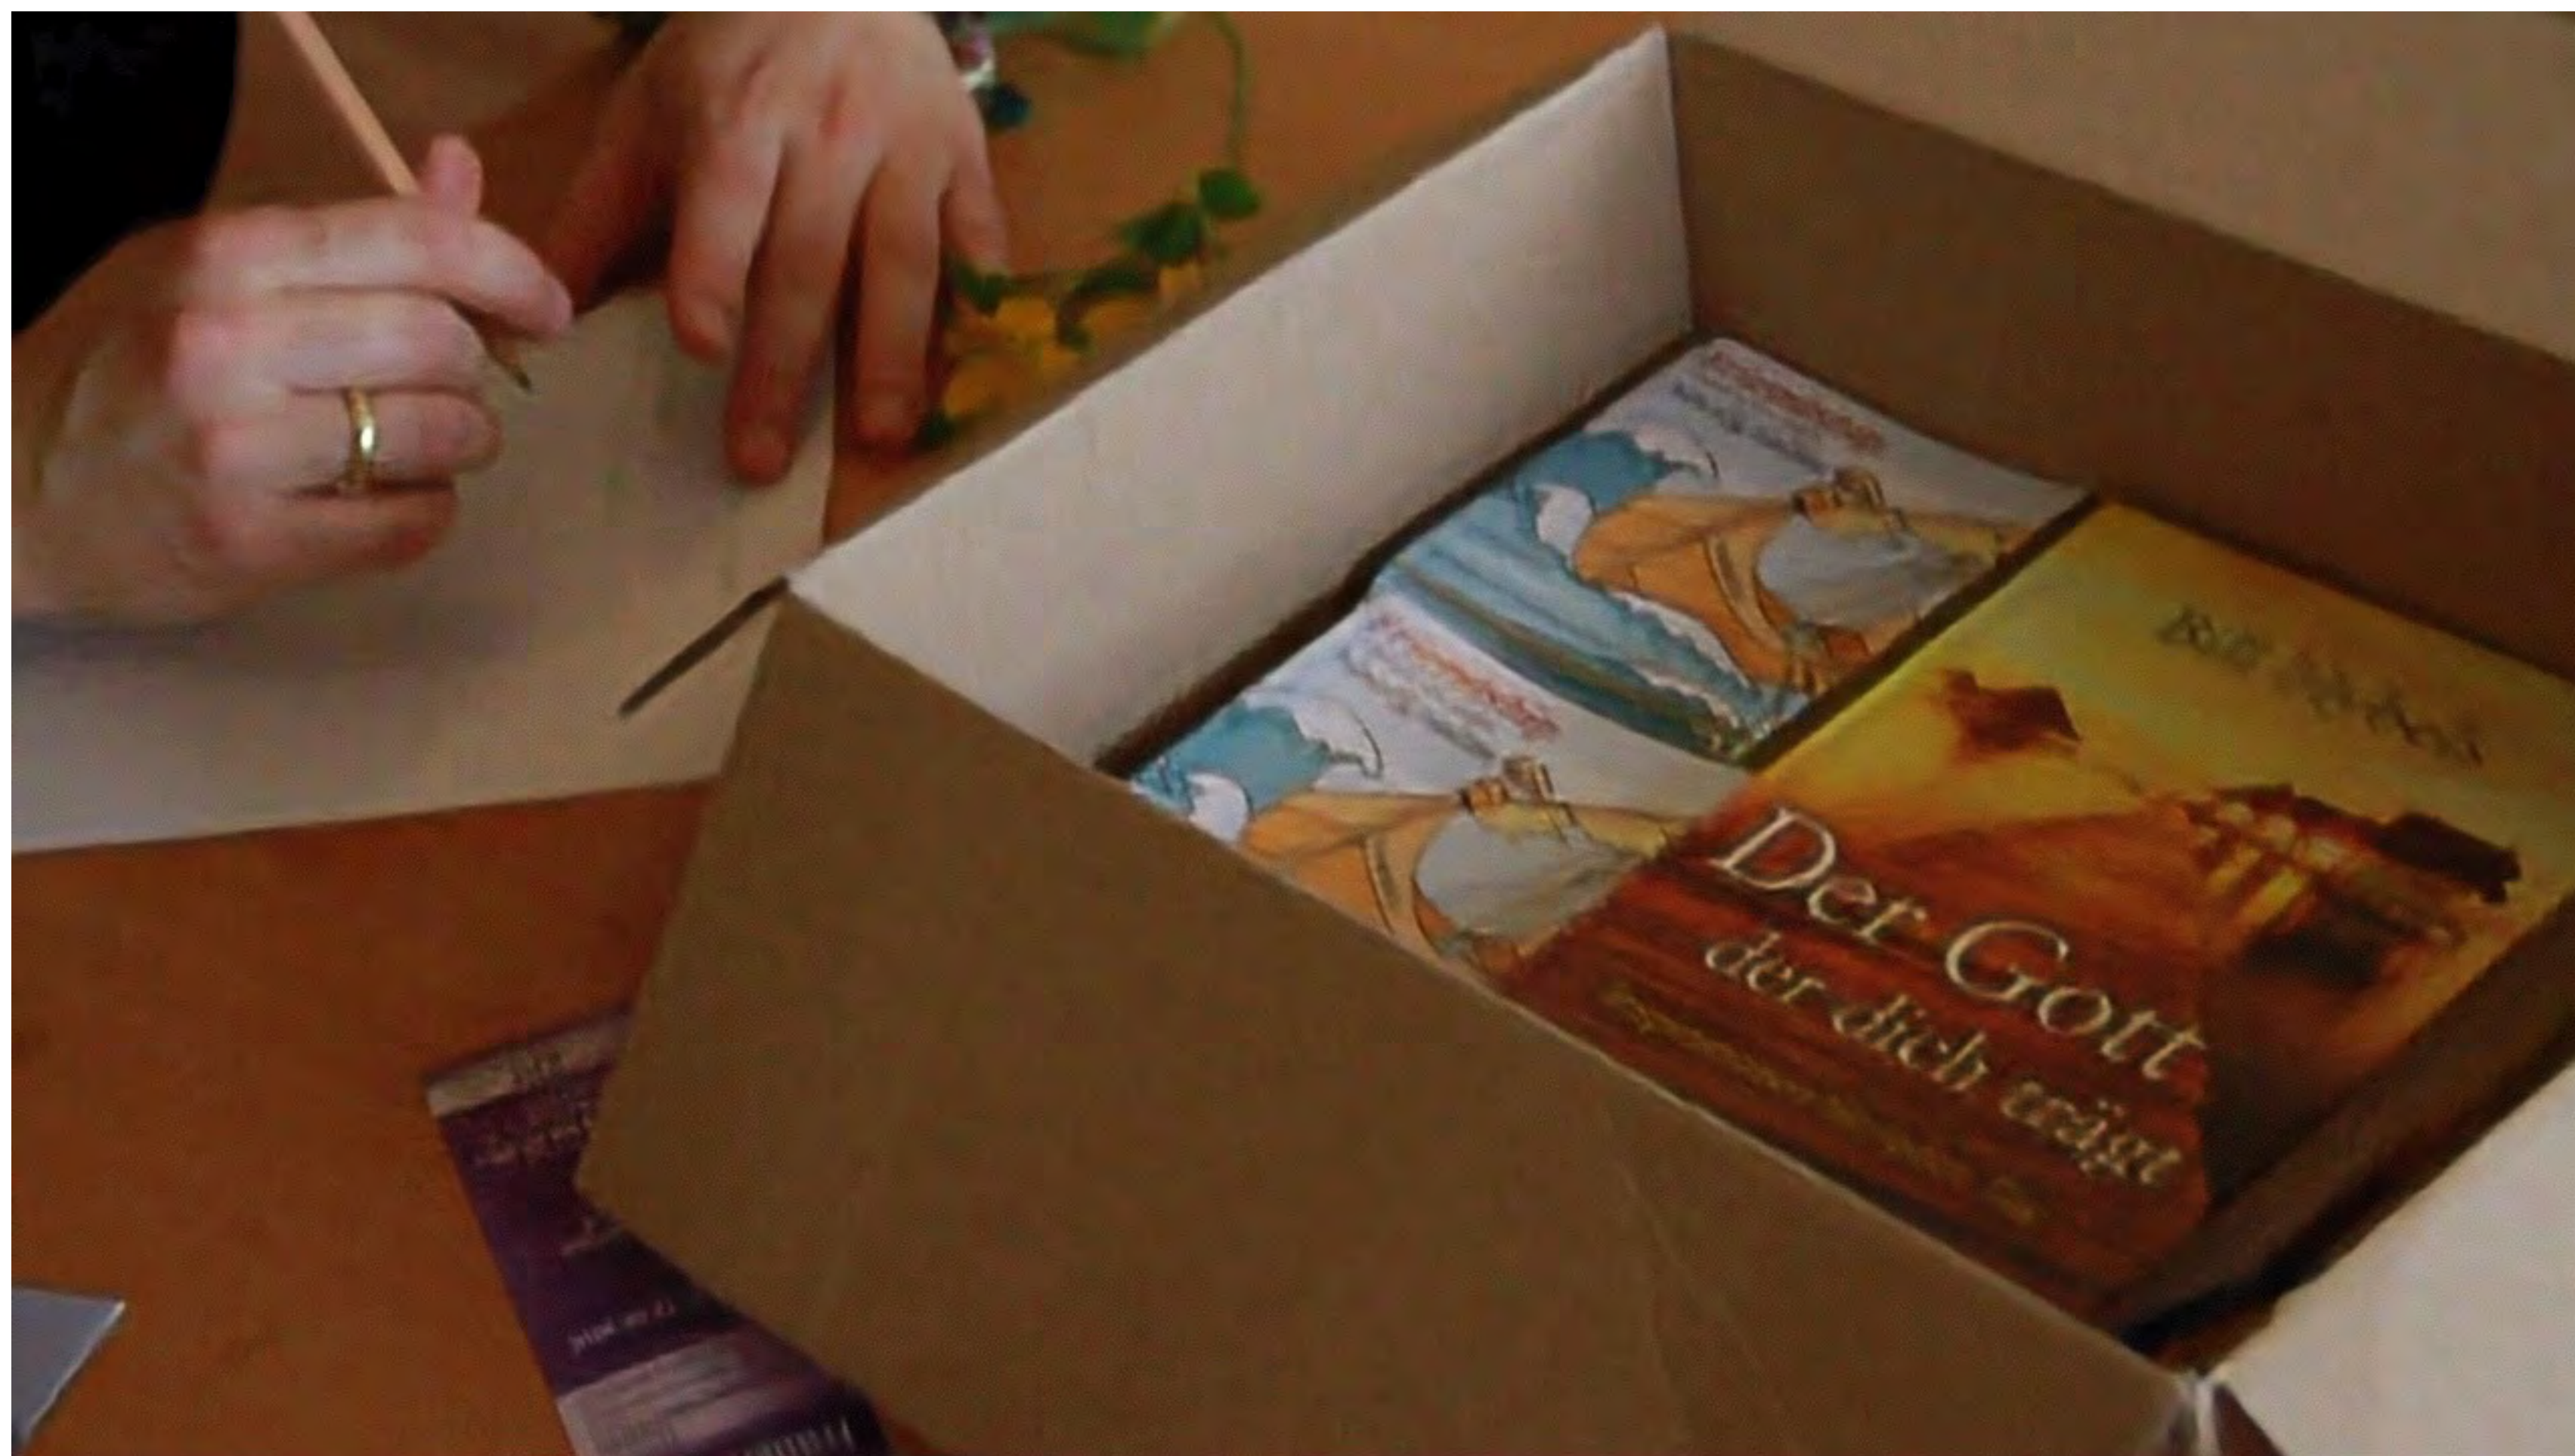

DBN+Noalign



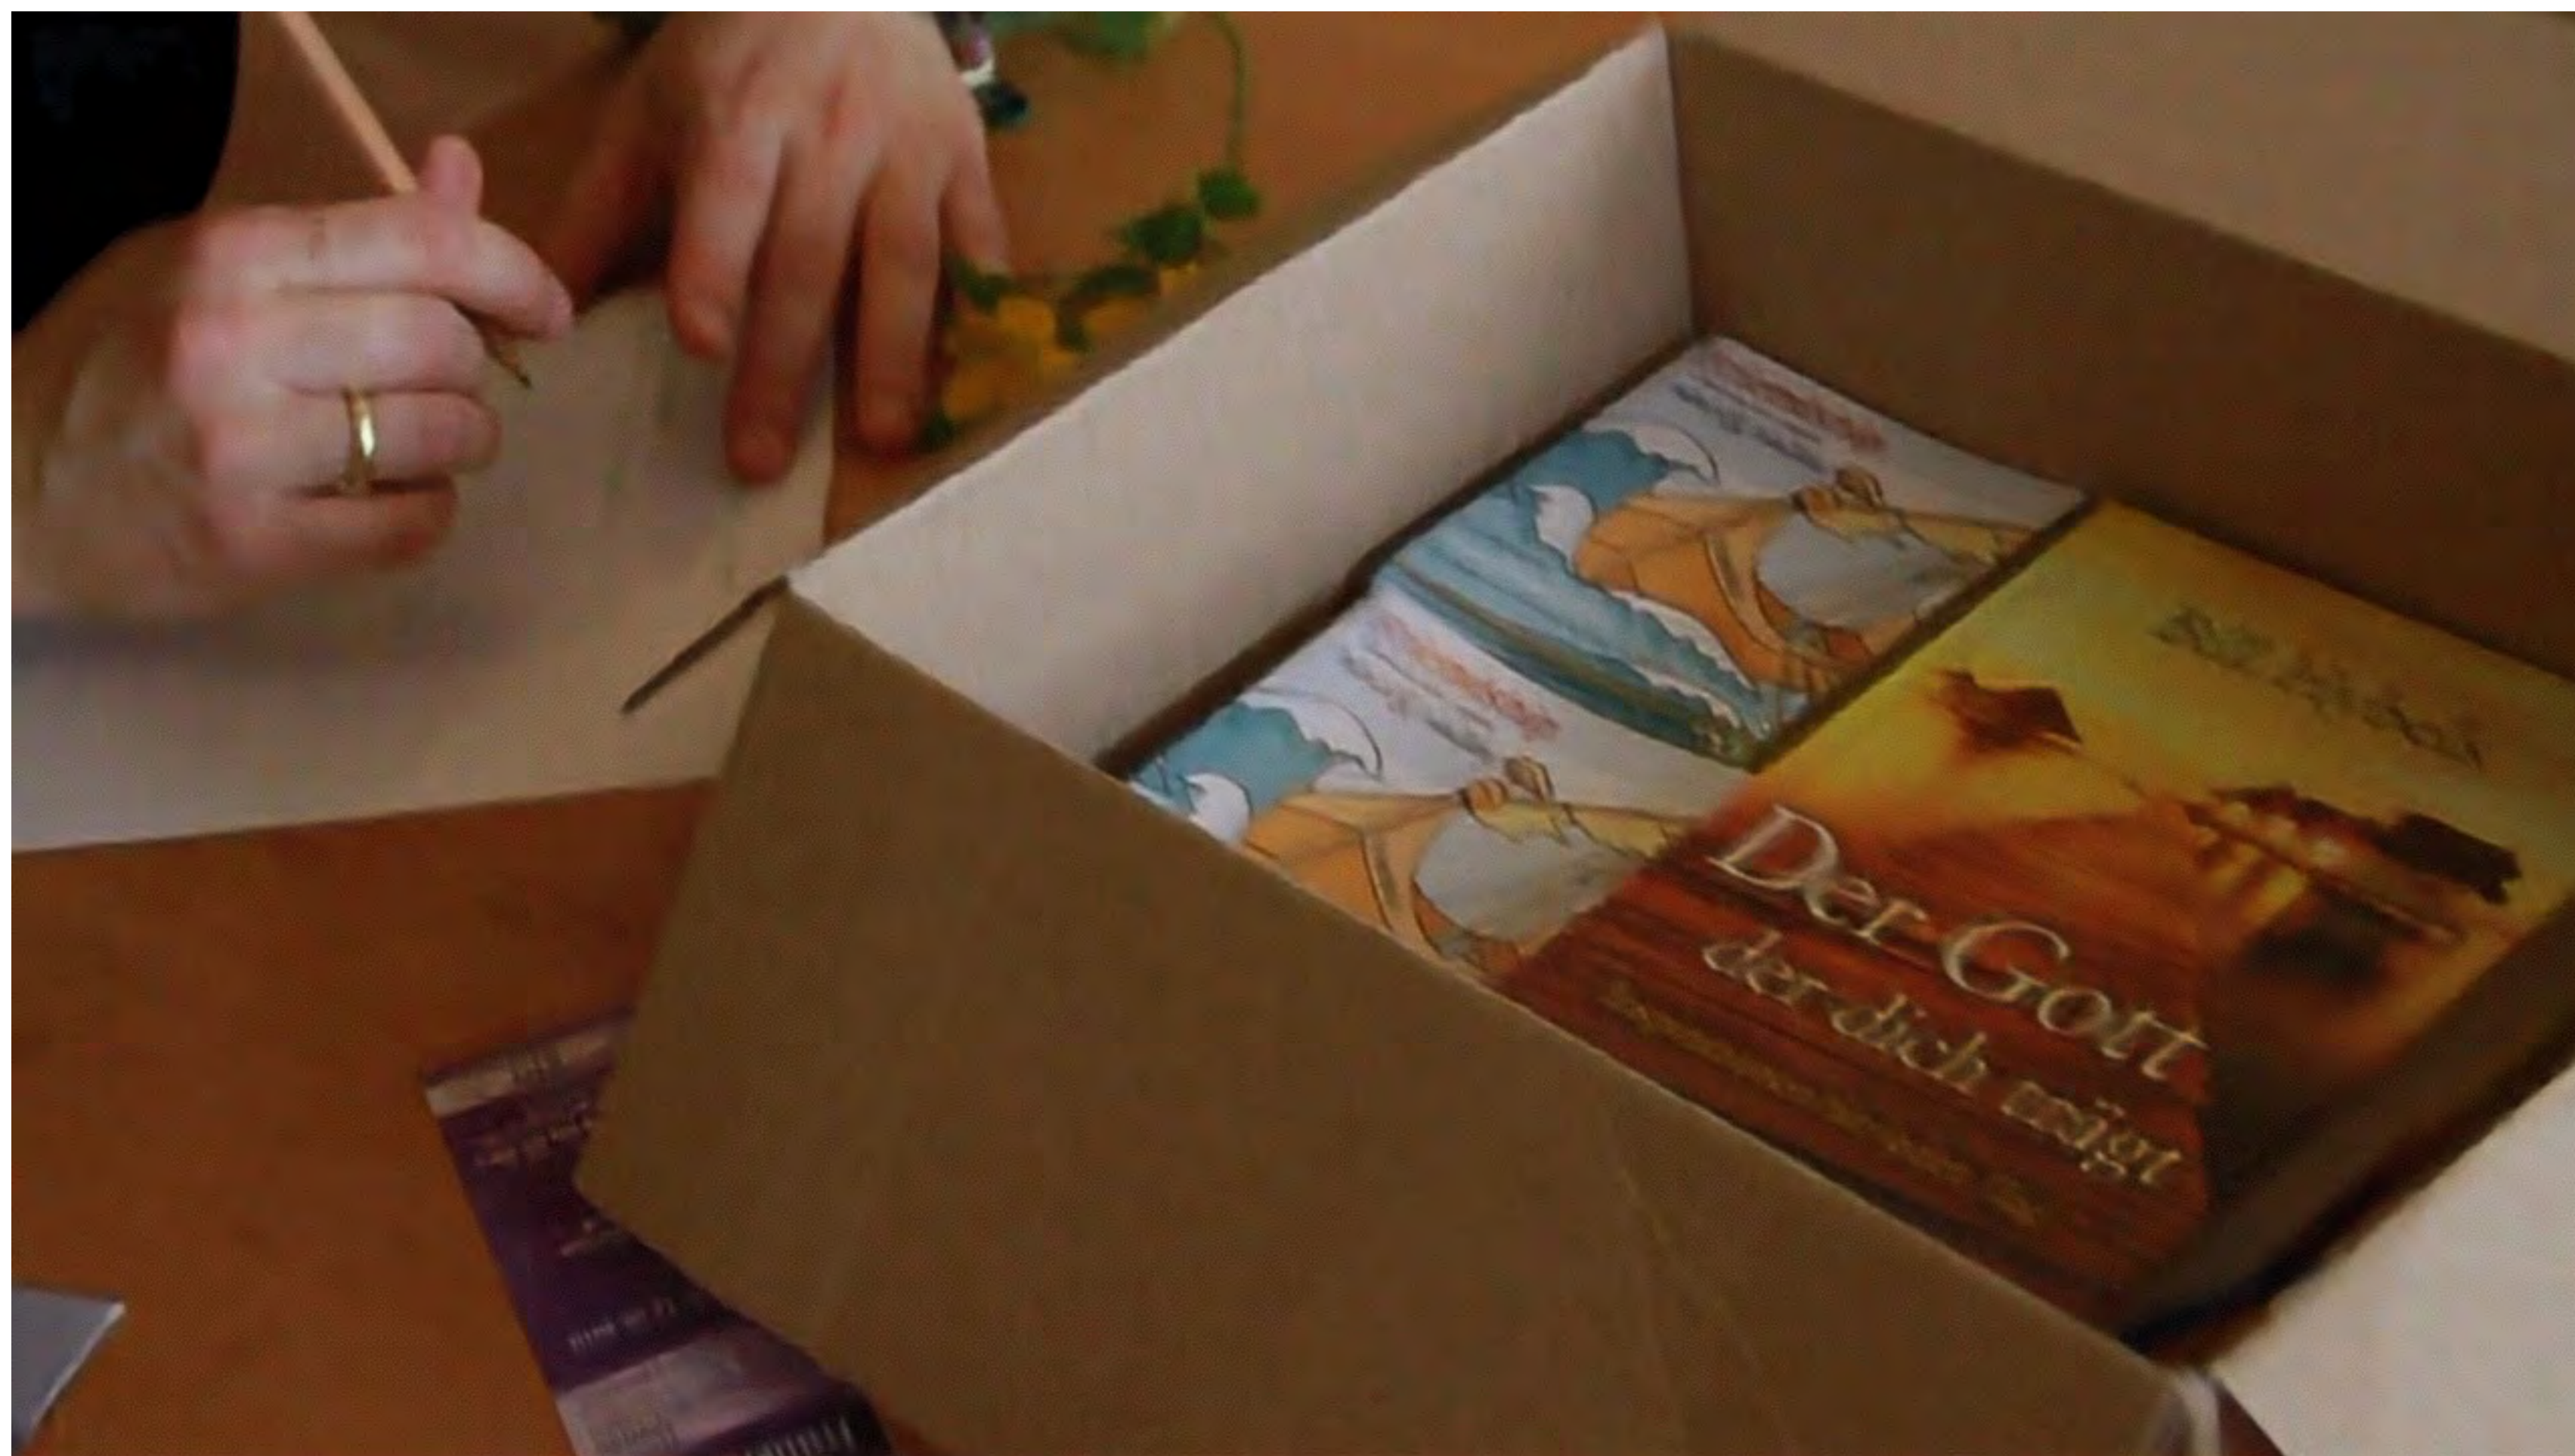

DBN+Homog



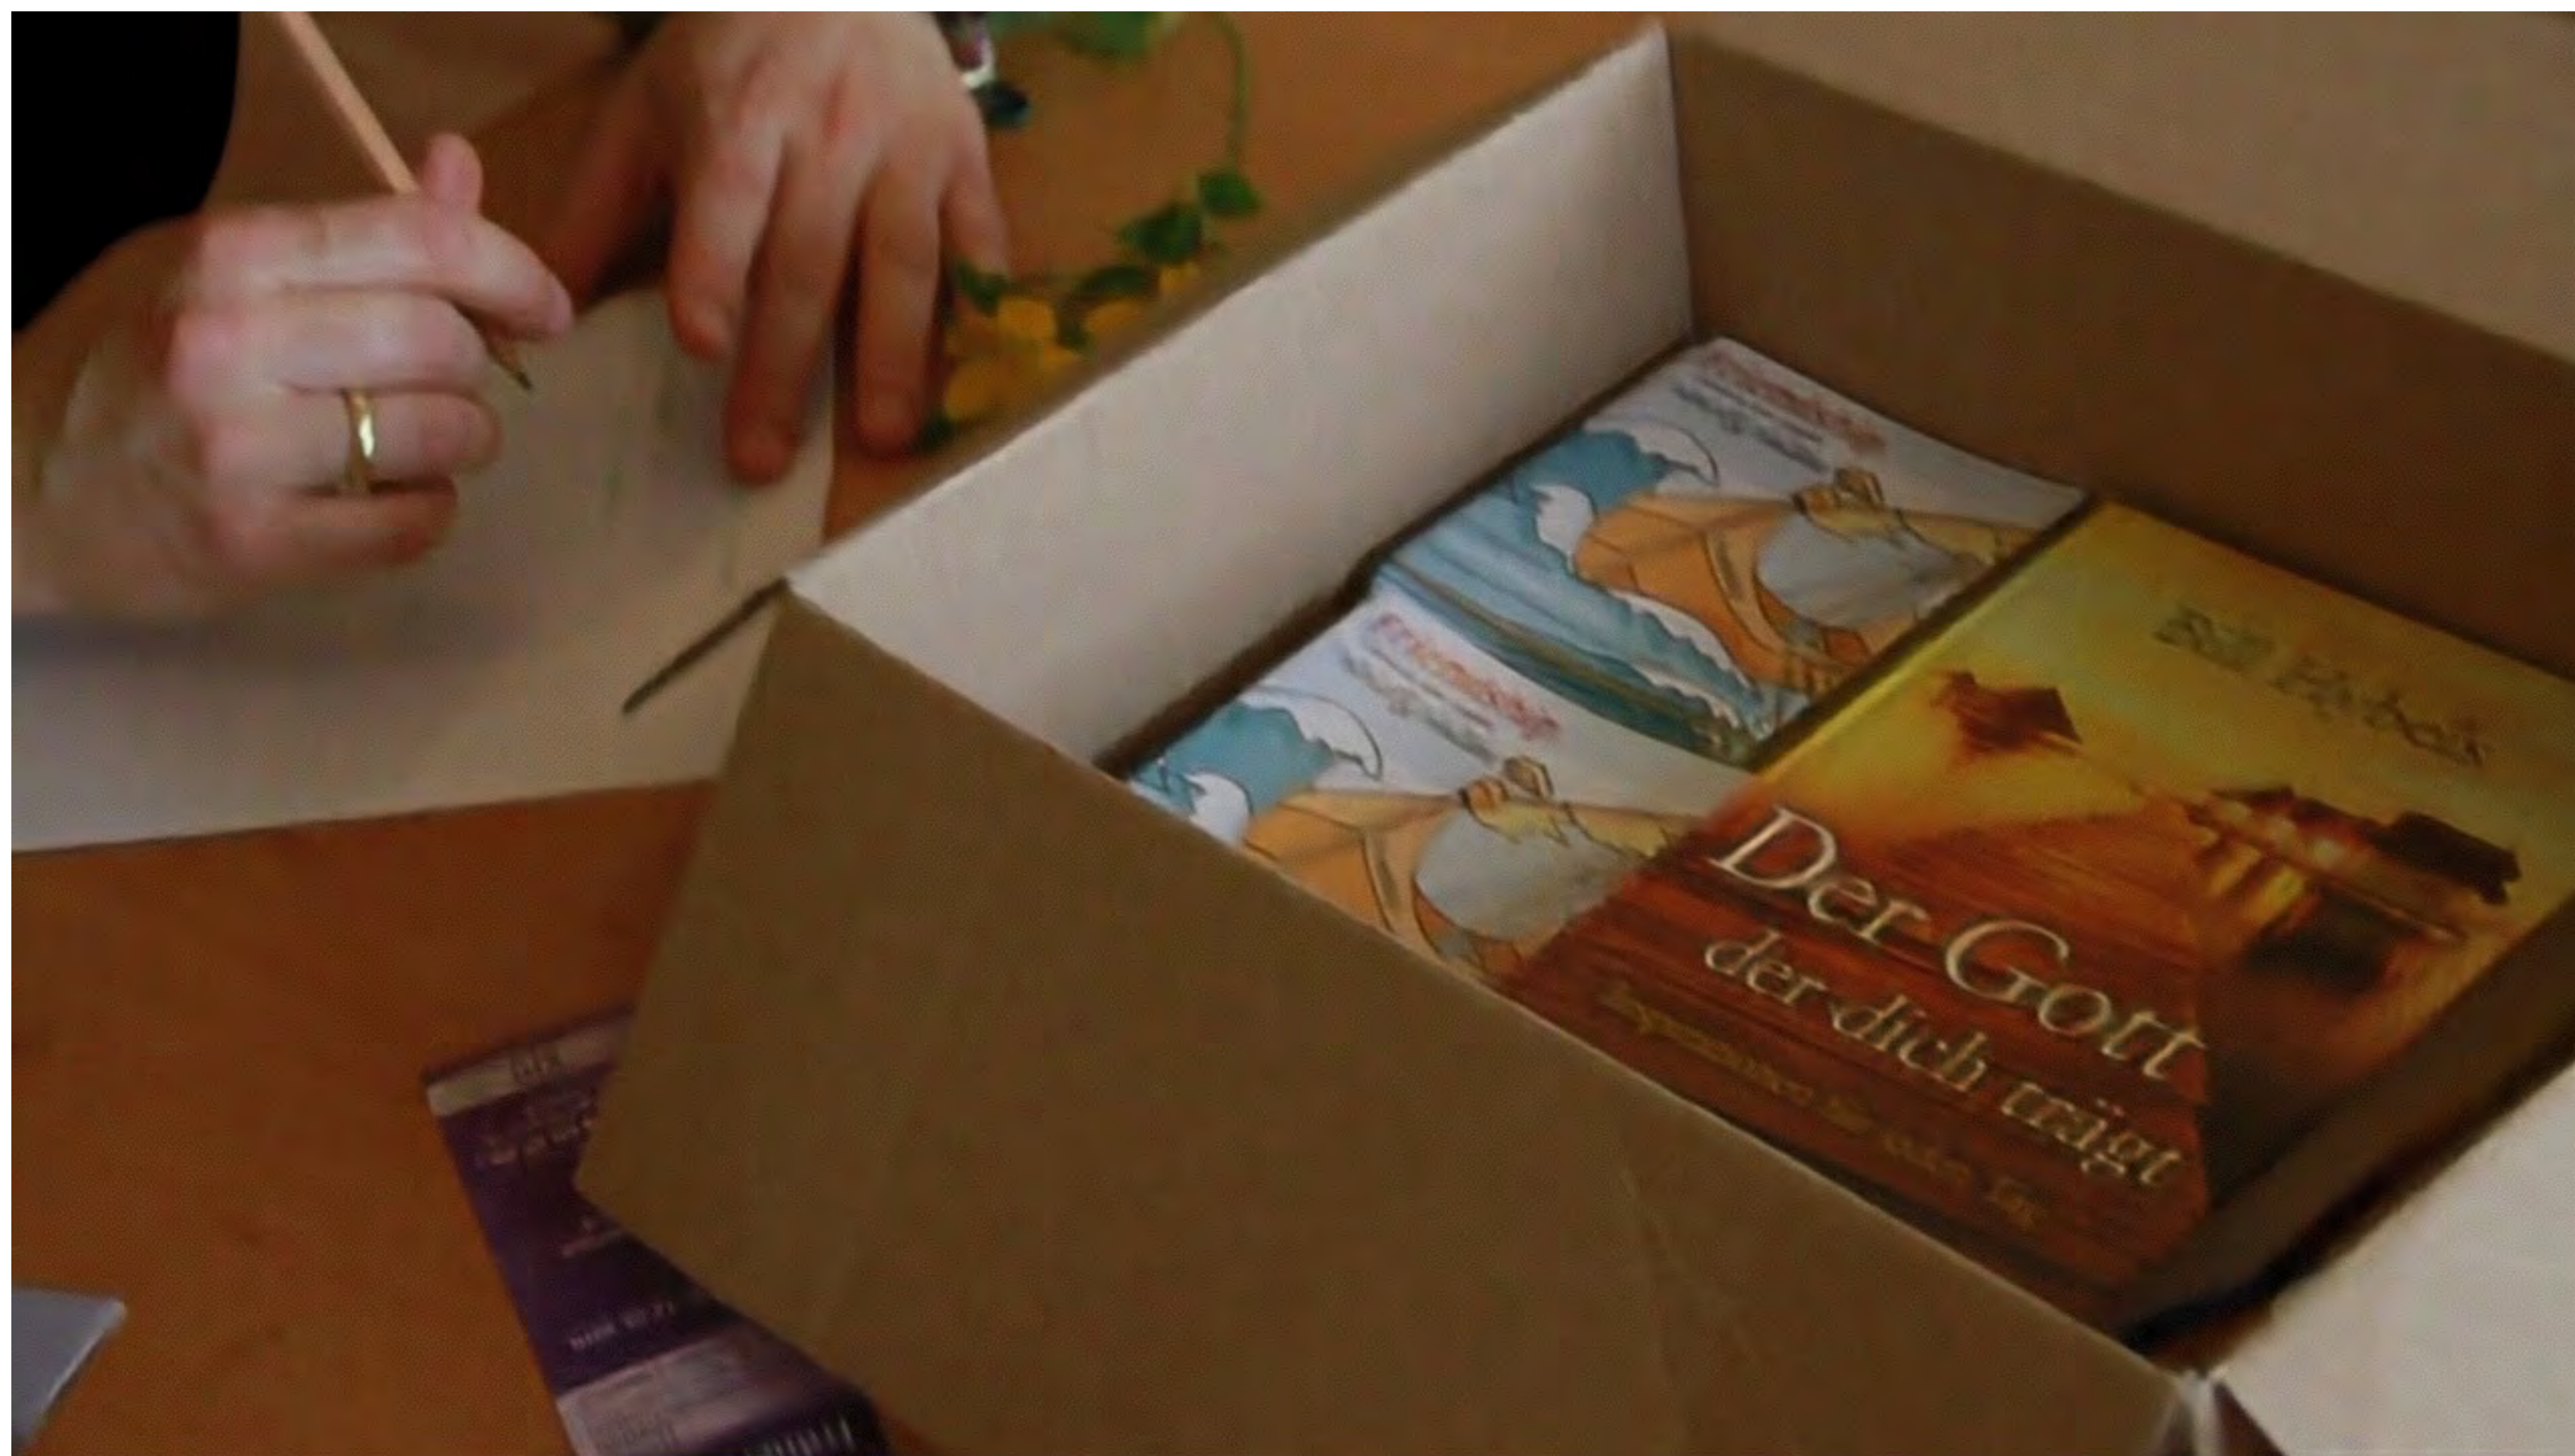

DBN+Flow



Additional Comparisons with Cho [3],  
Kim and Lee [15], and WFA [5]



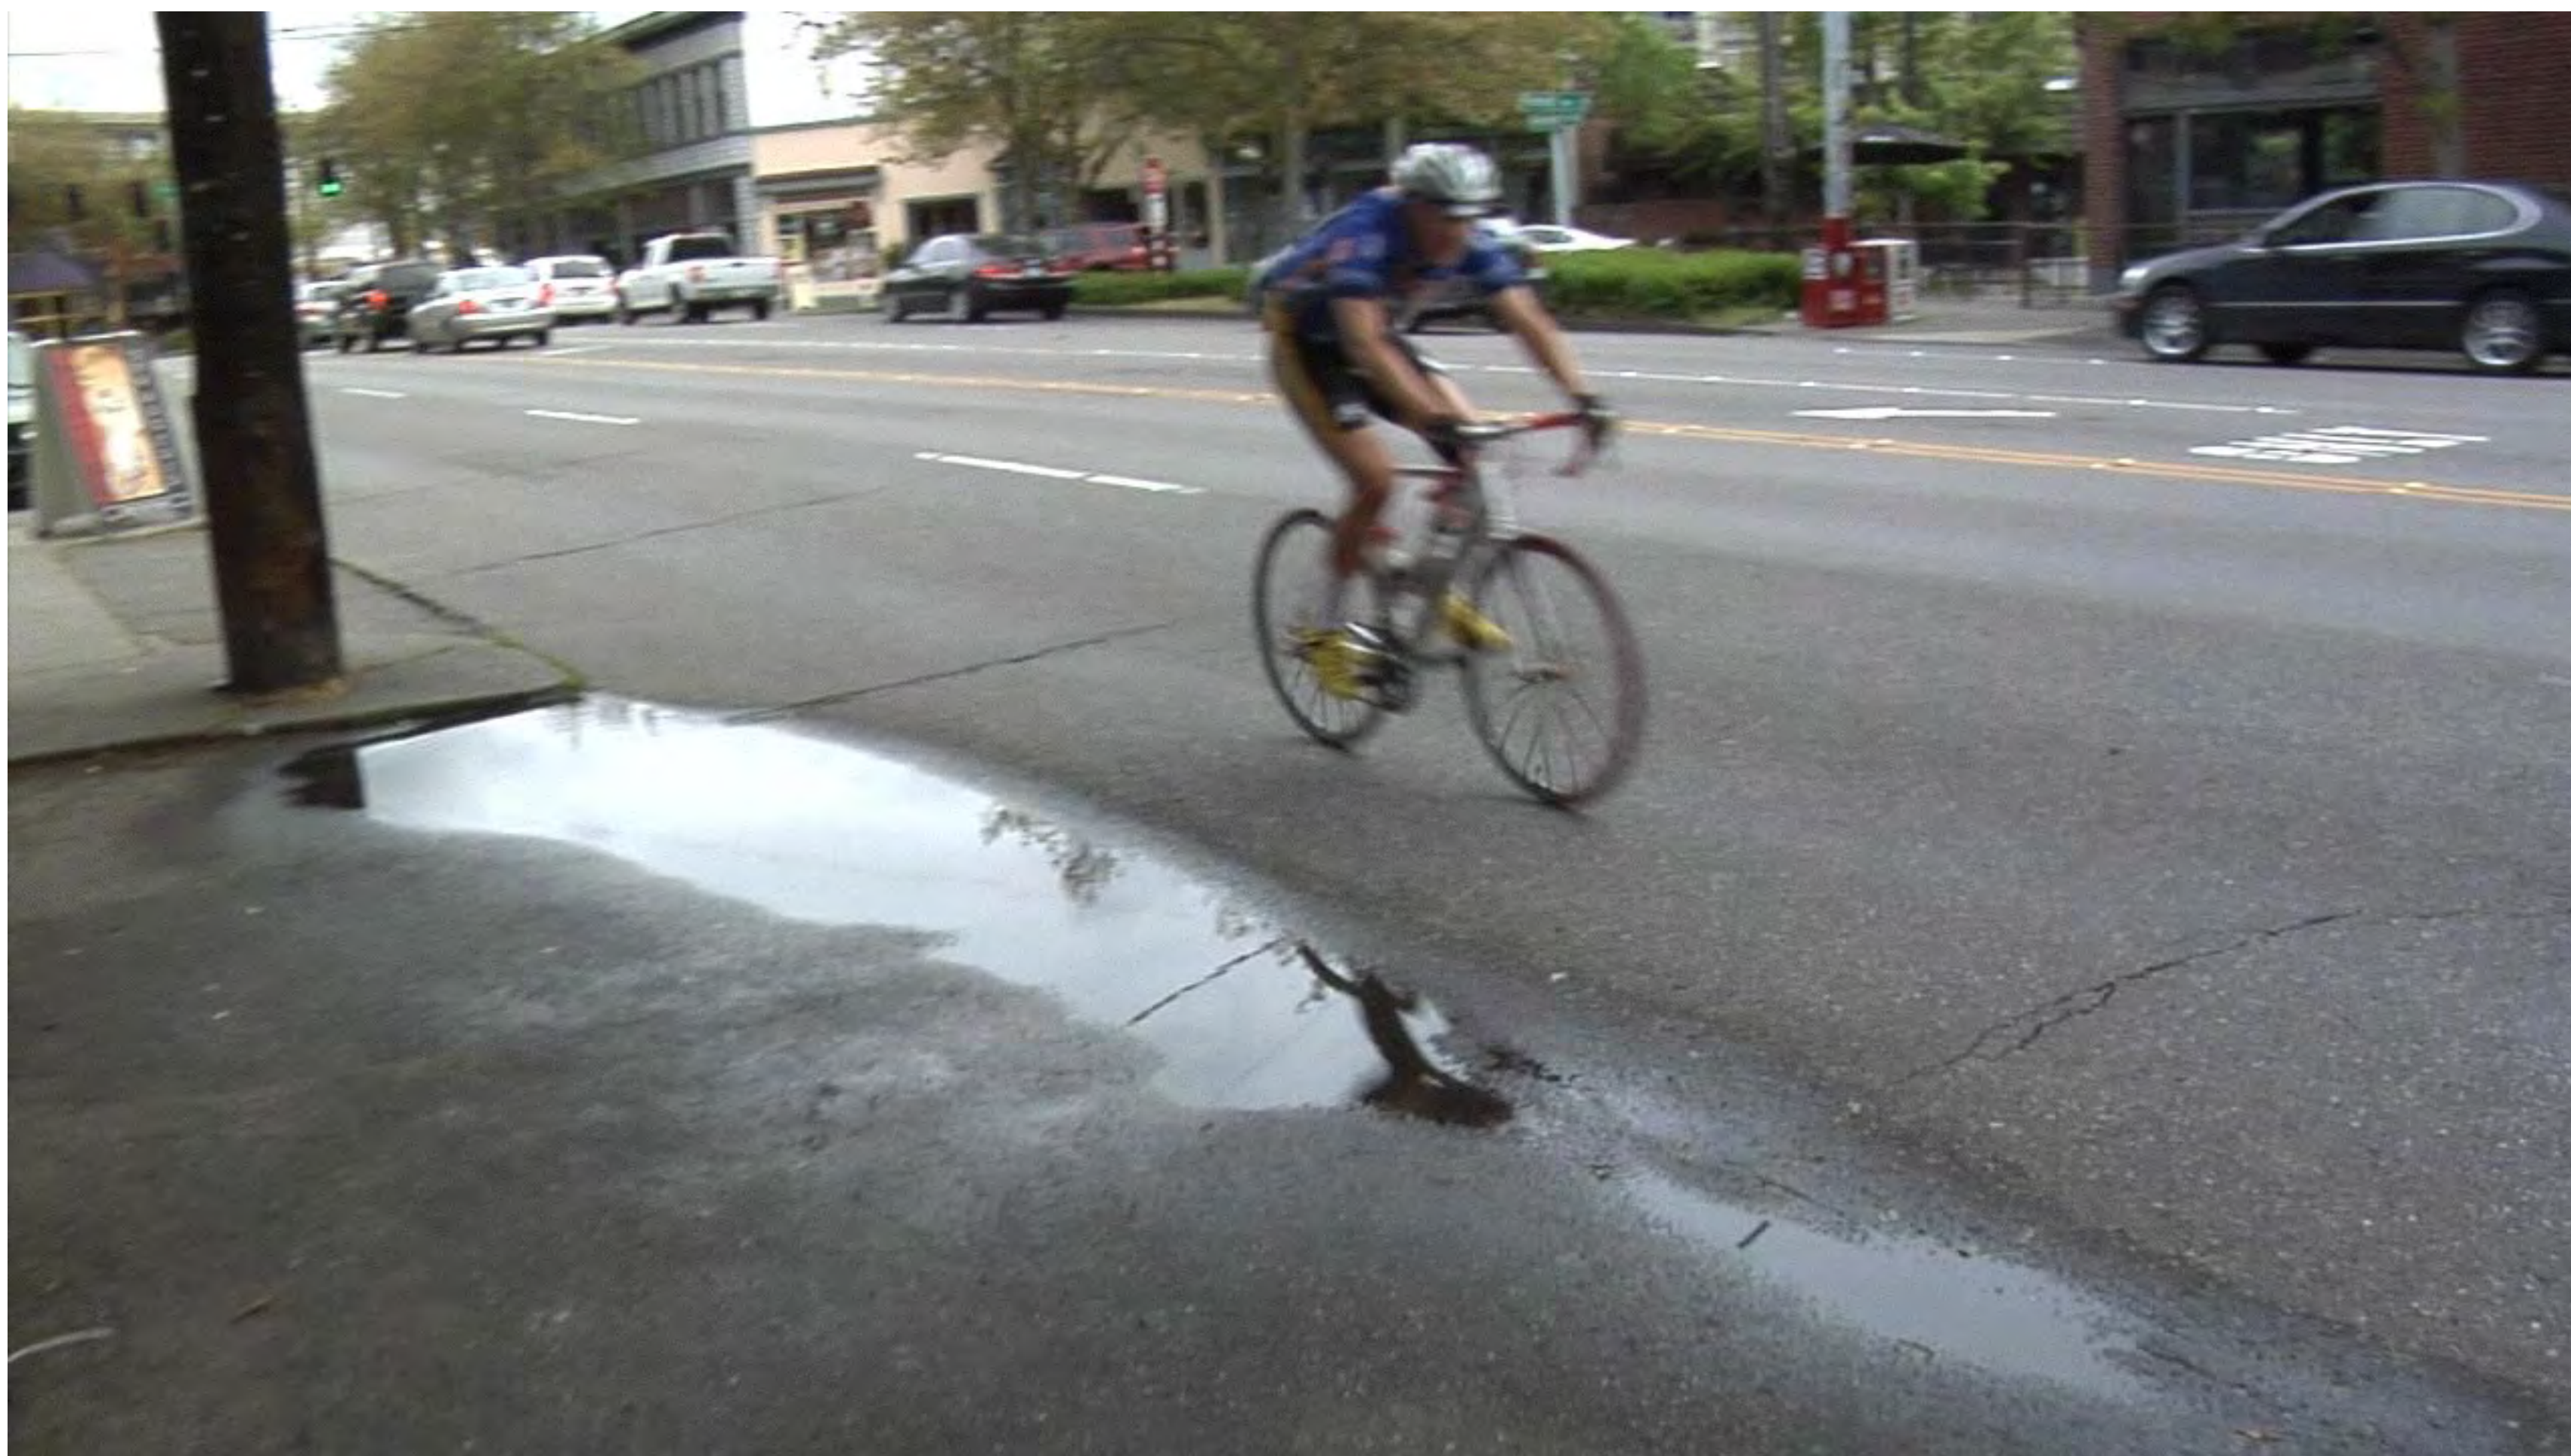

input



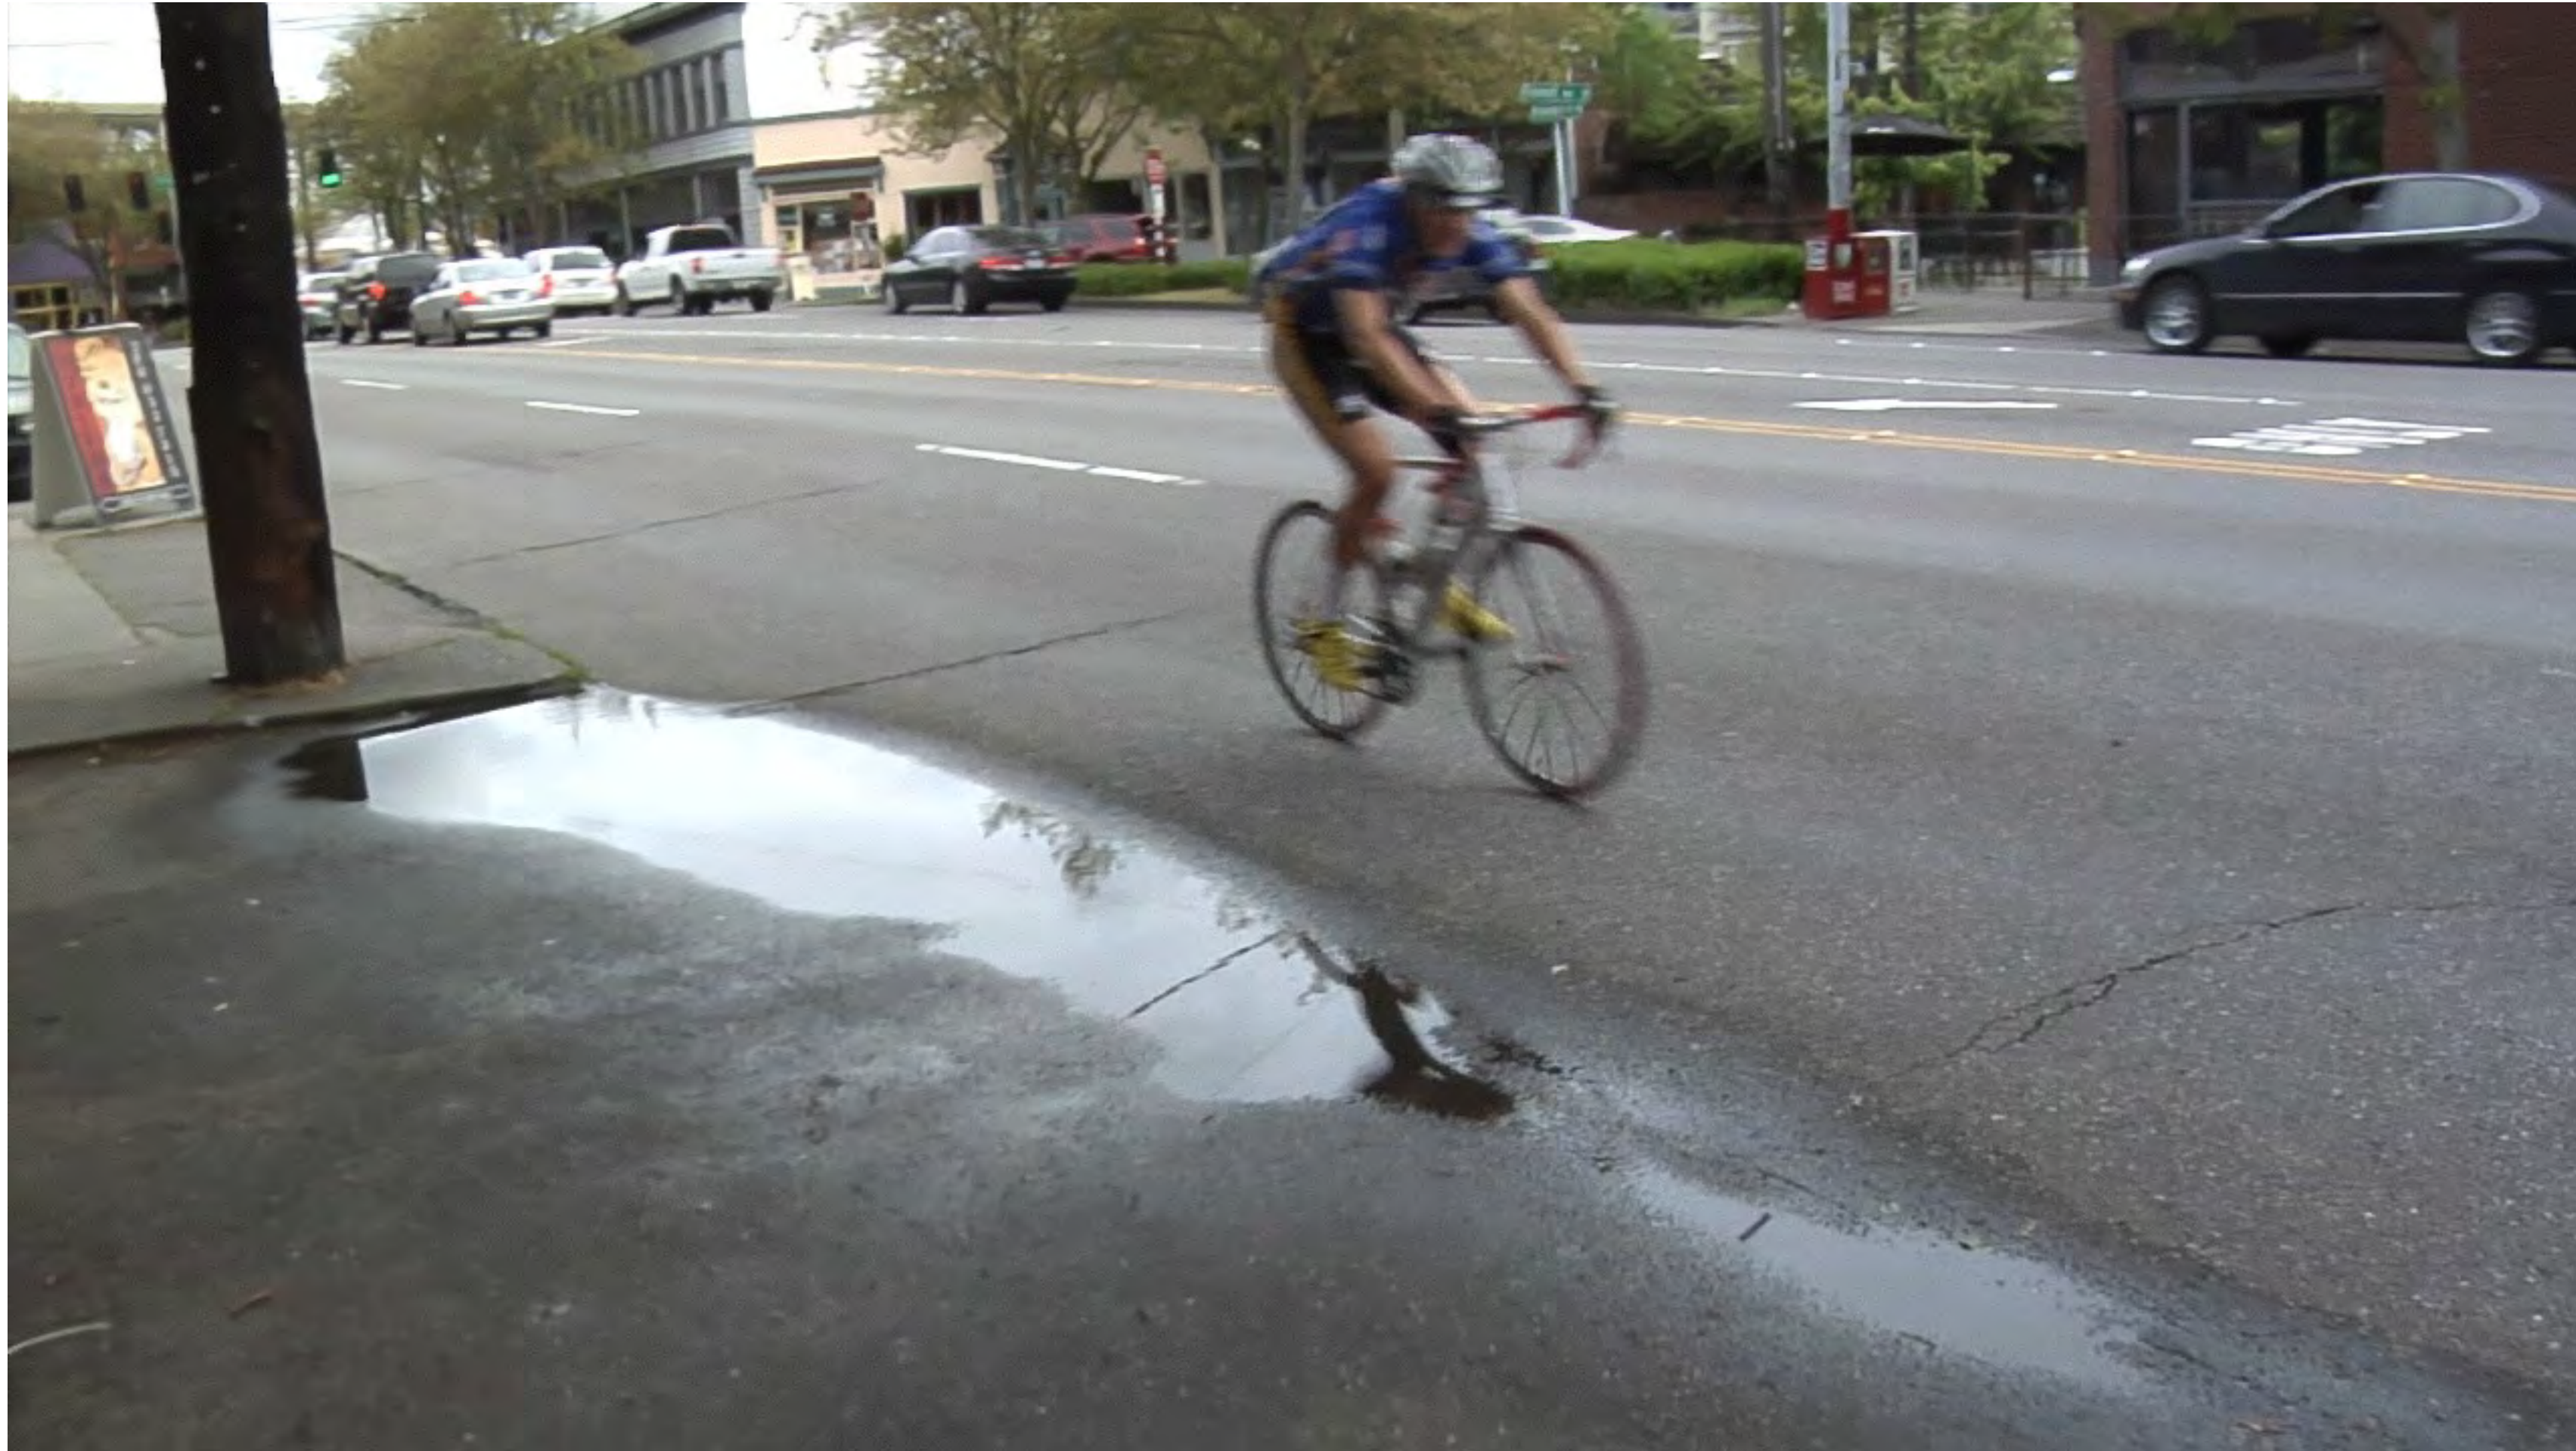

Cho [3]



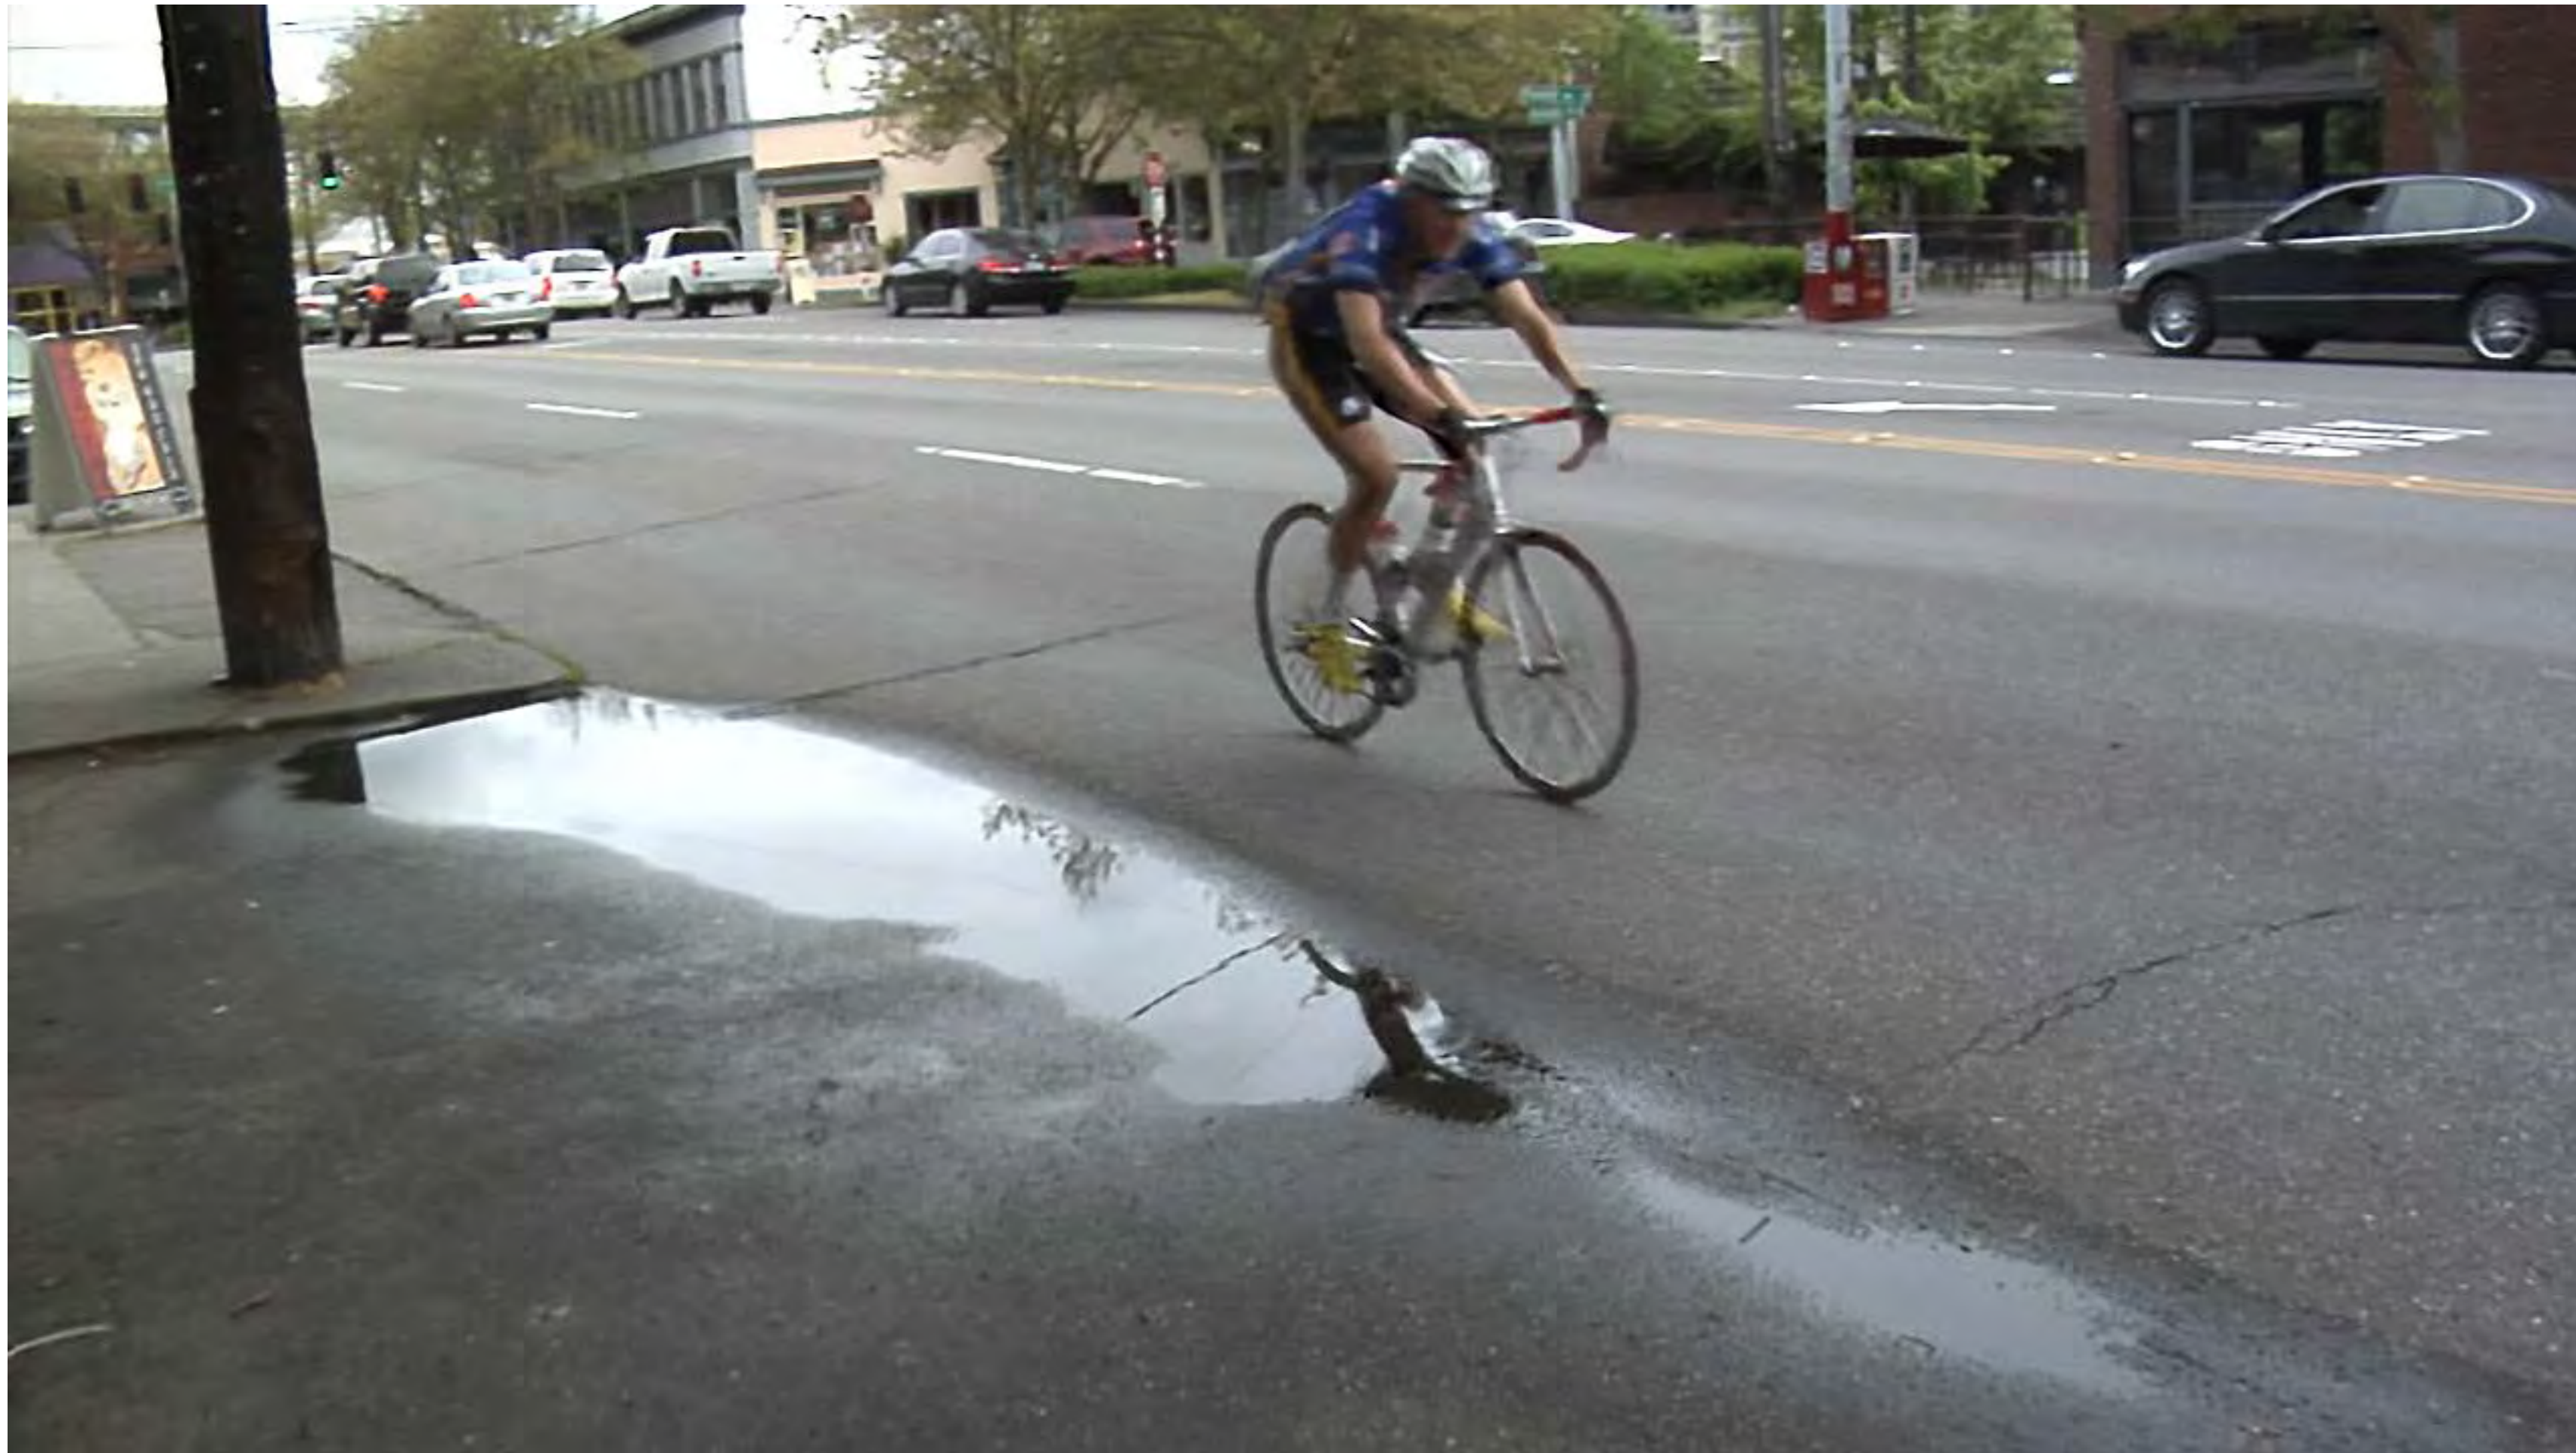

Kim and Lee [15]



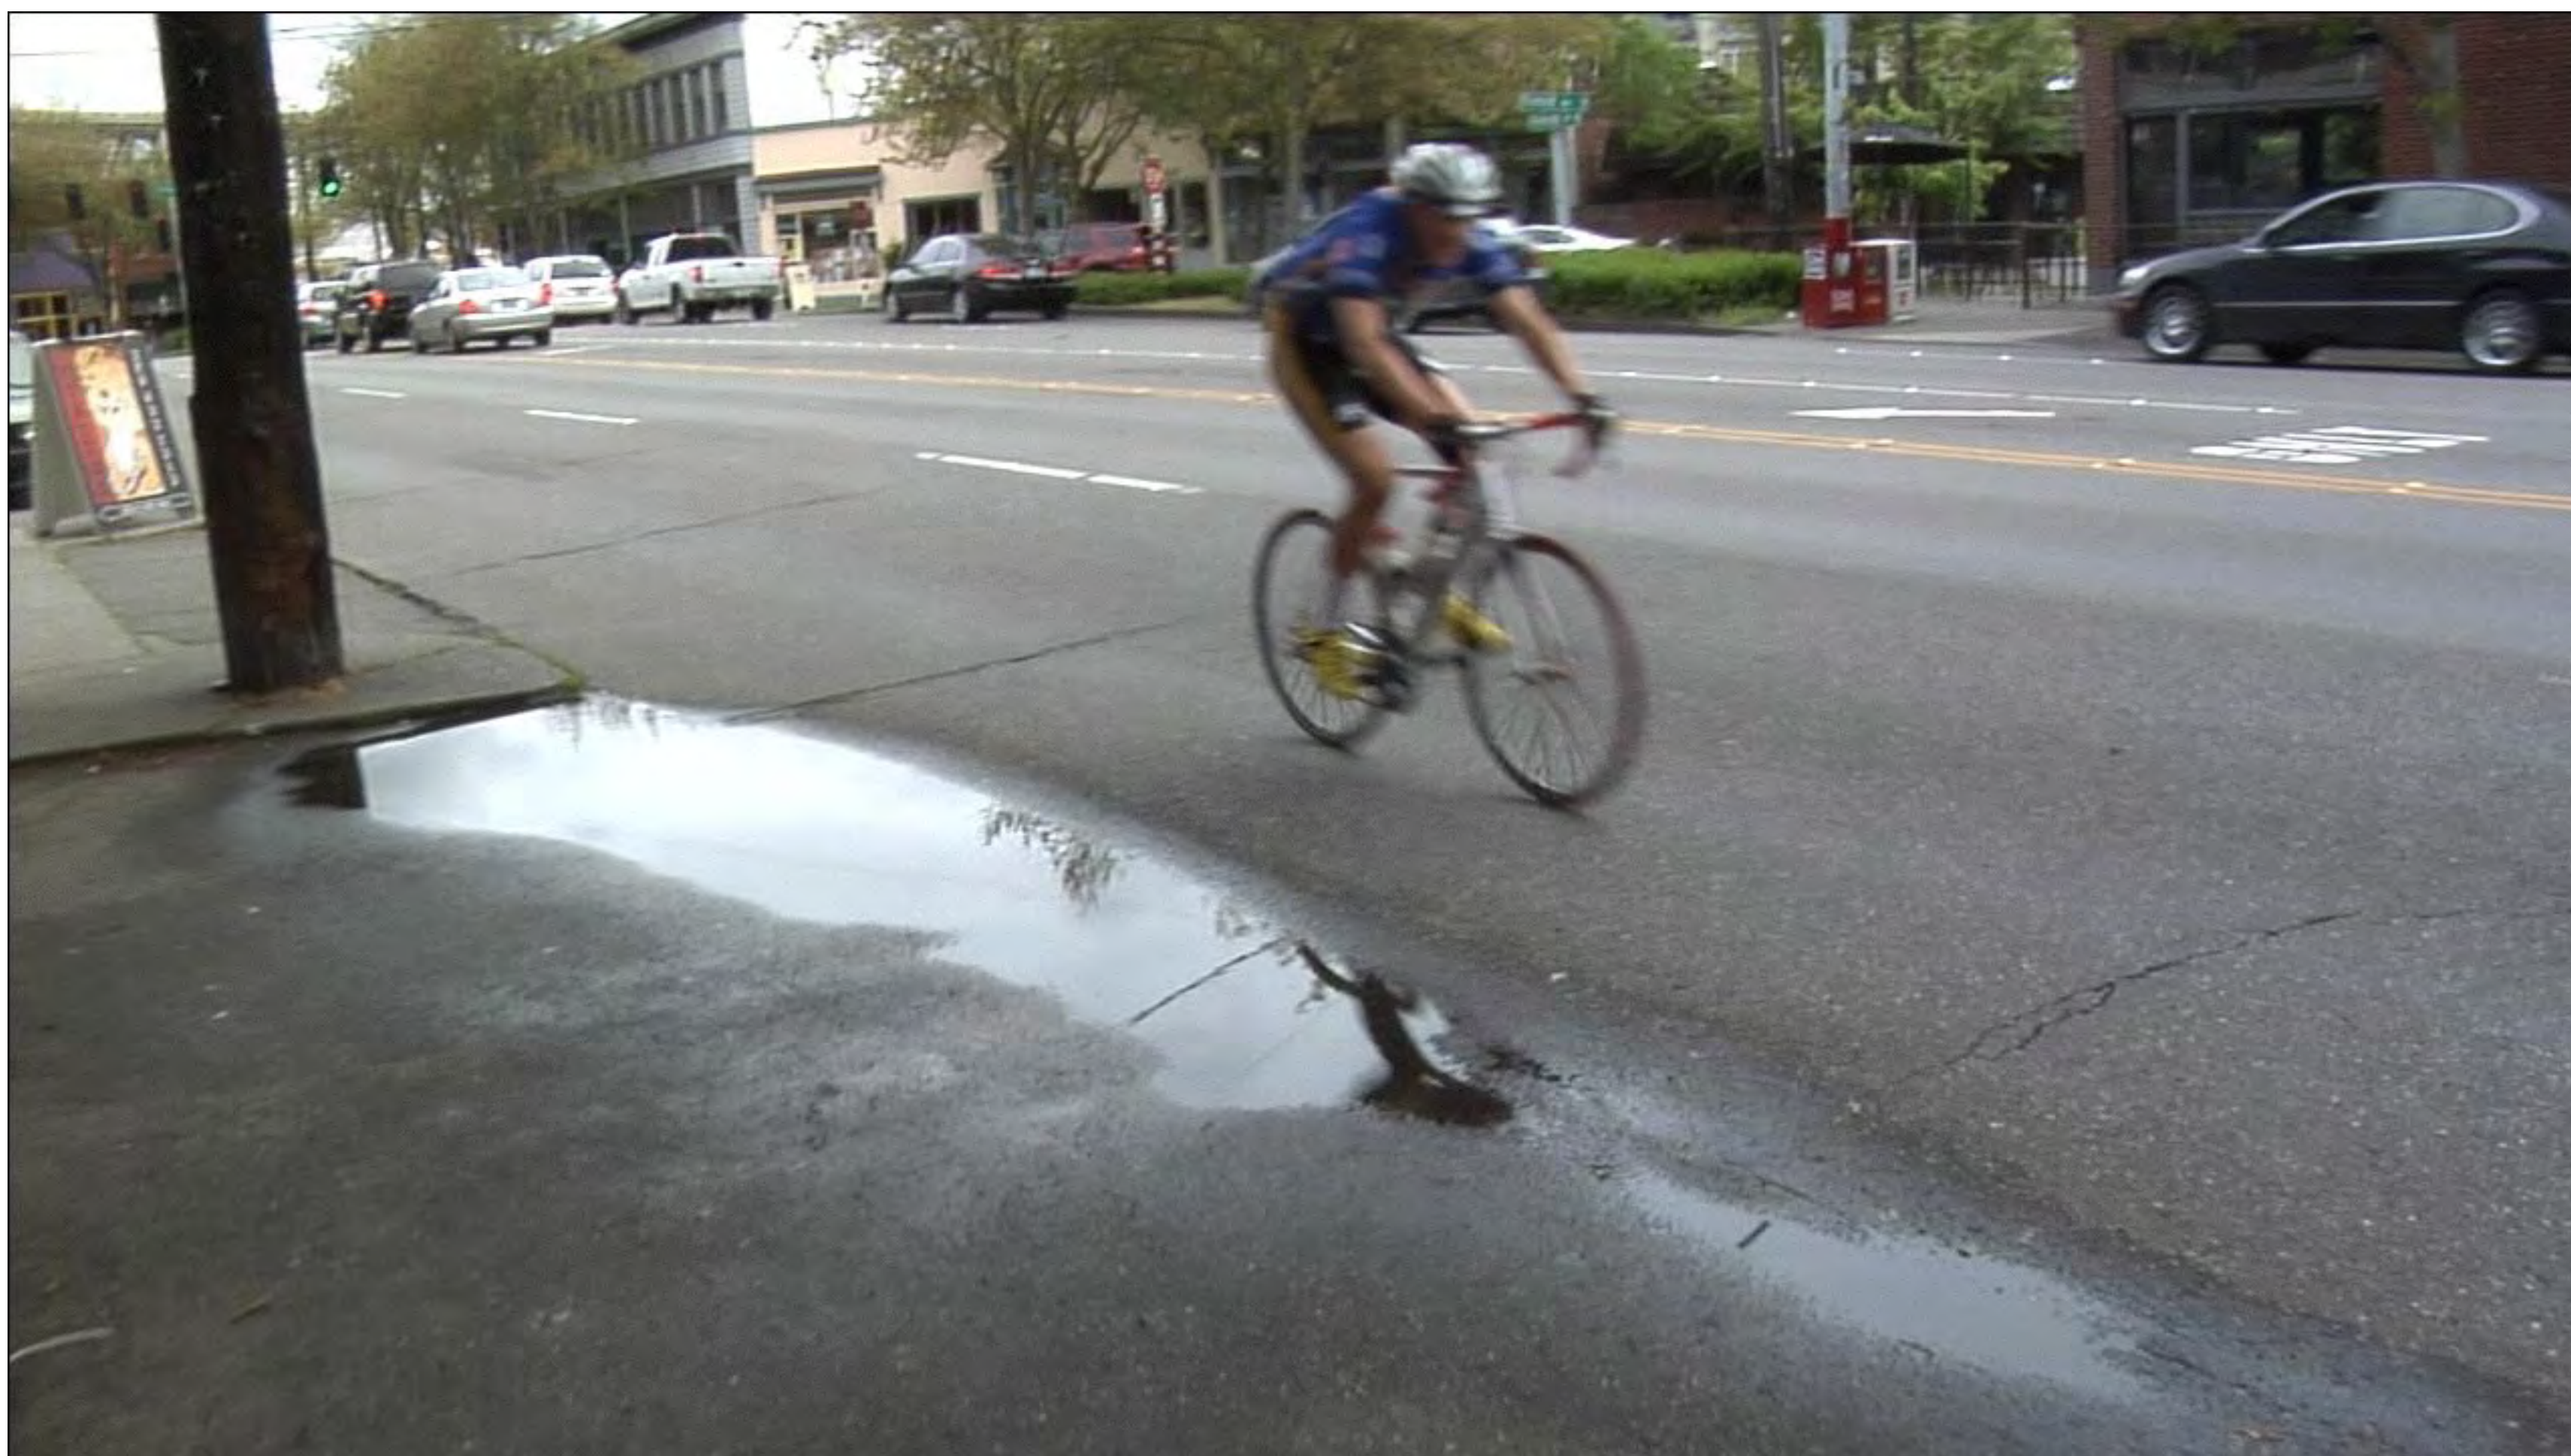

WFA [5]



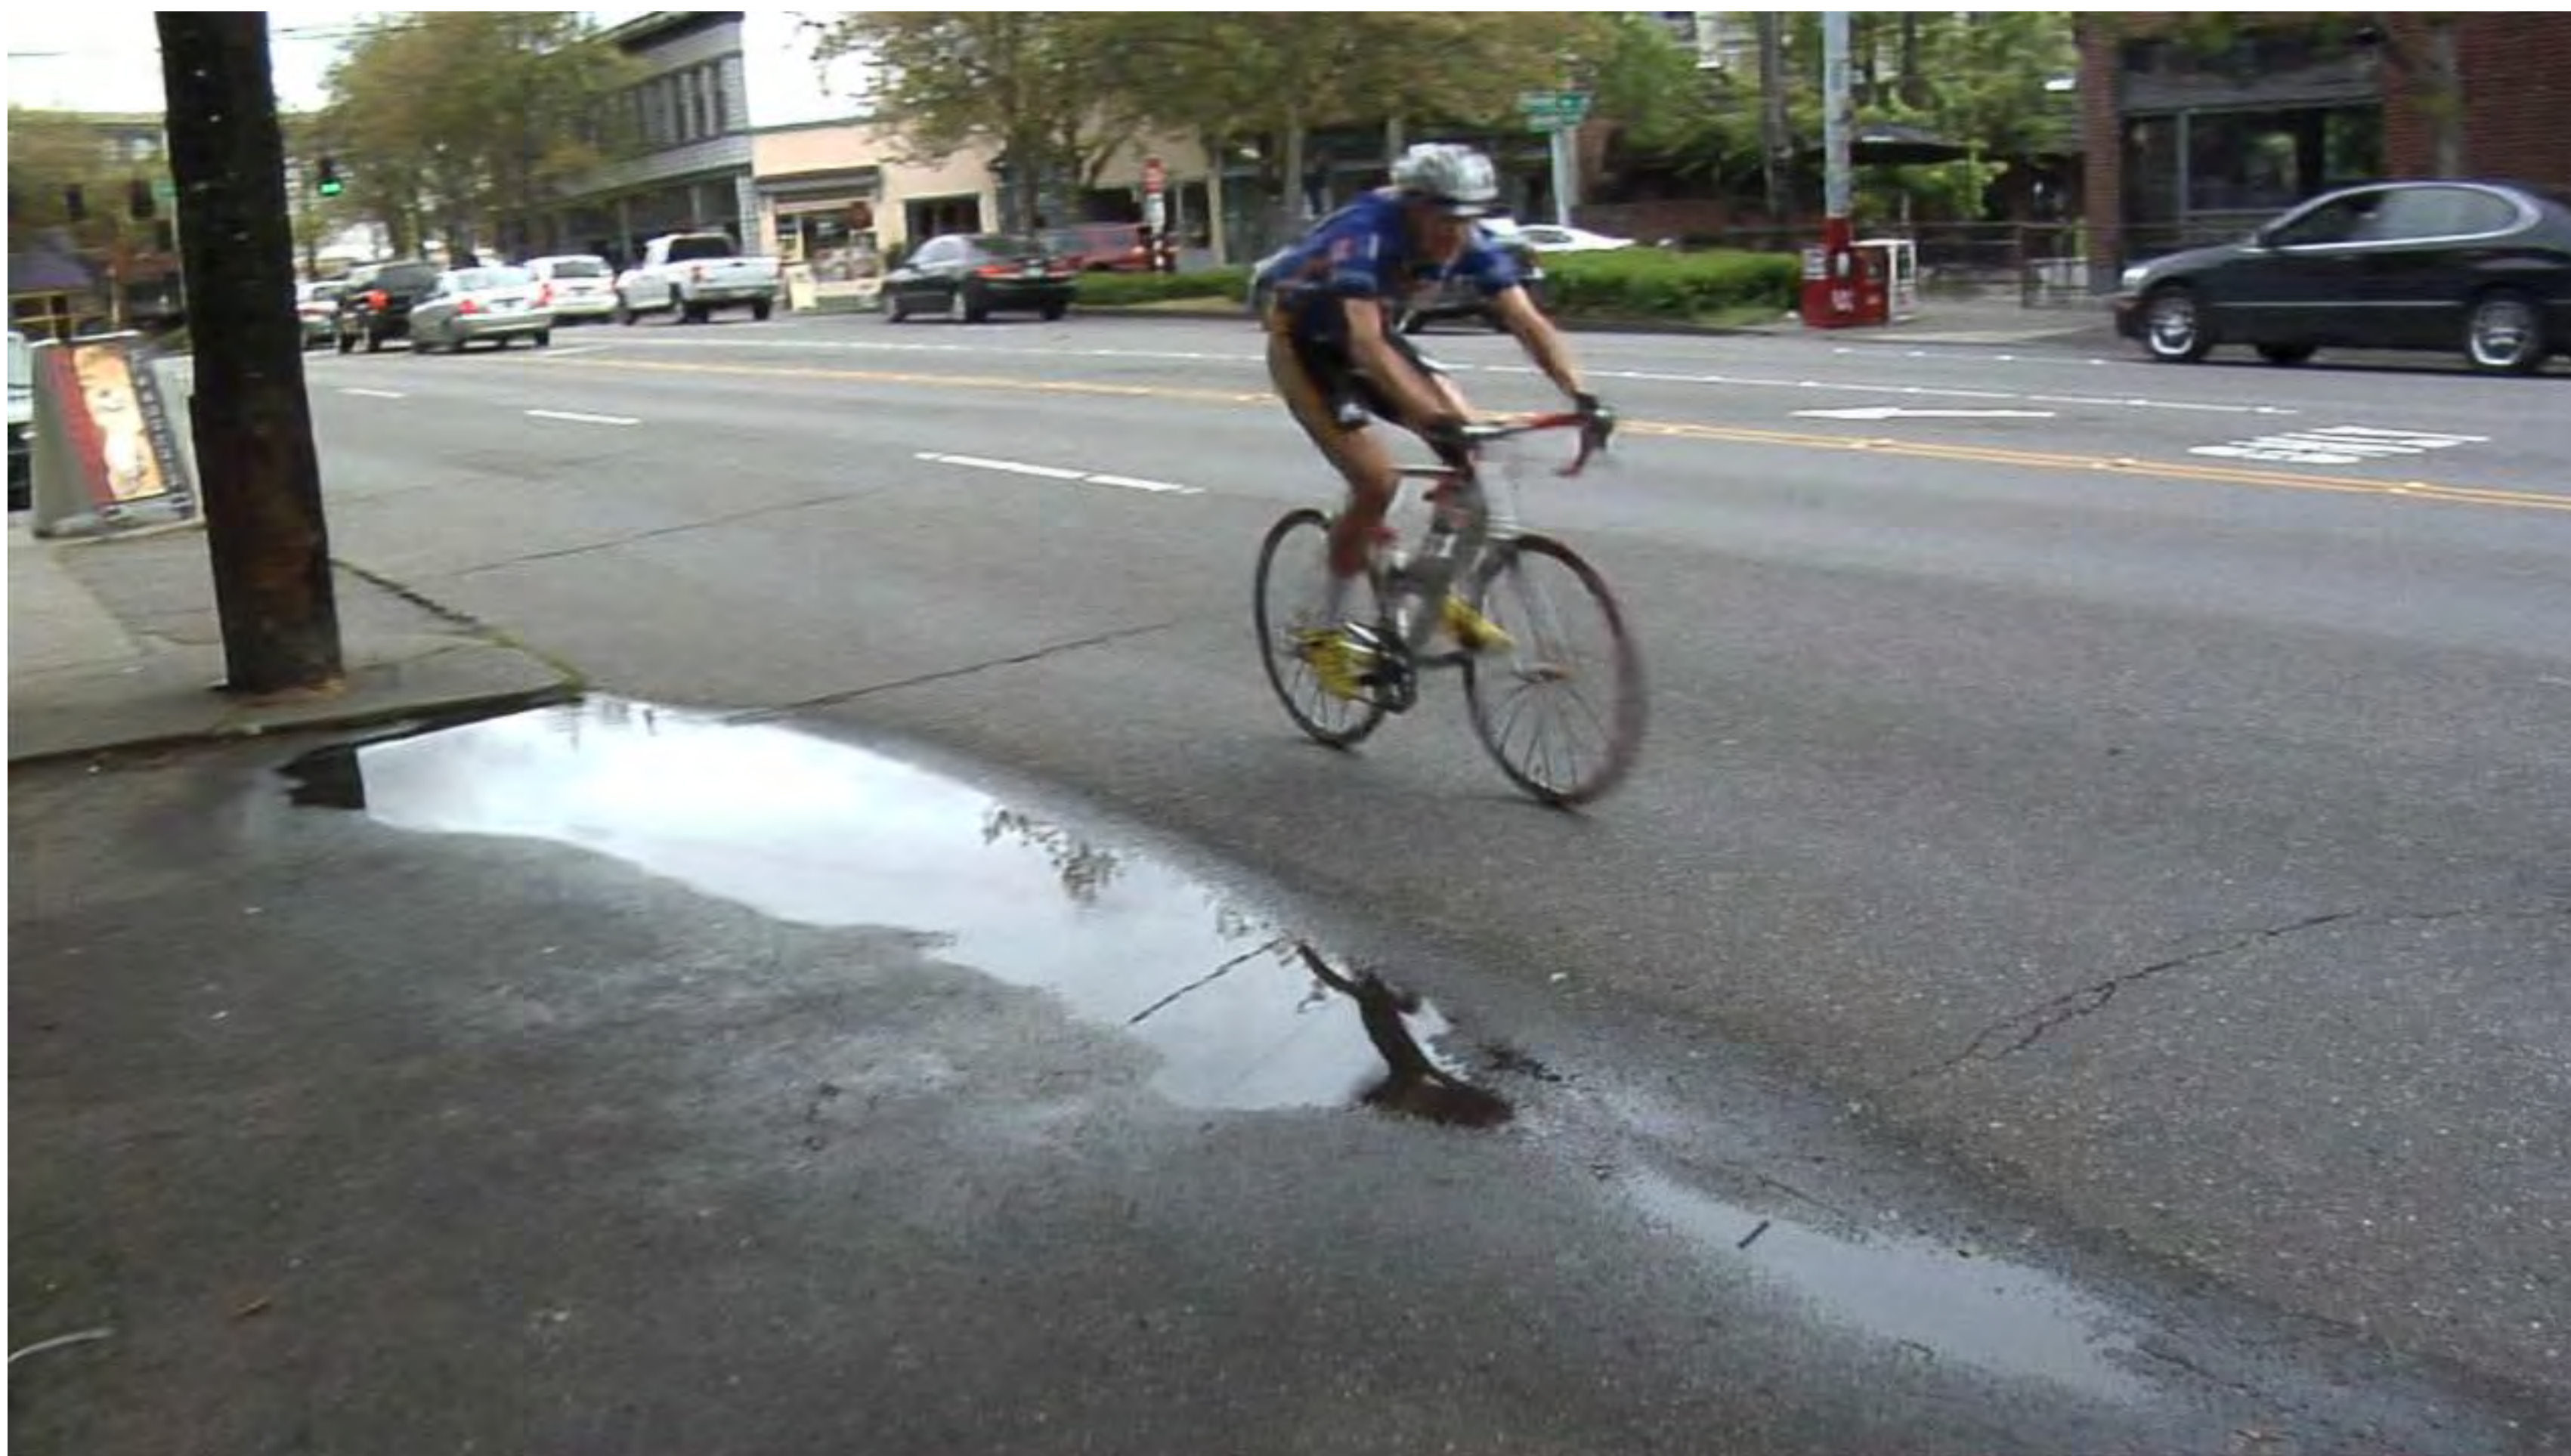

DBN+Single



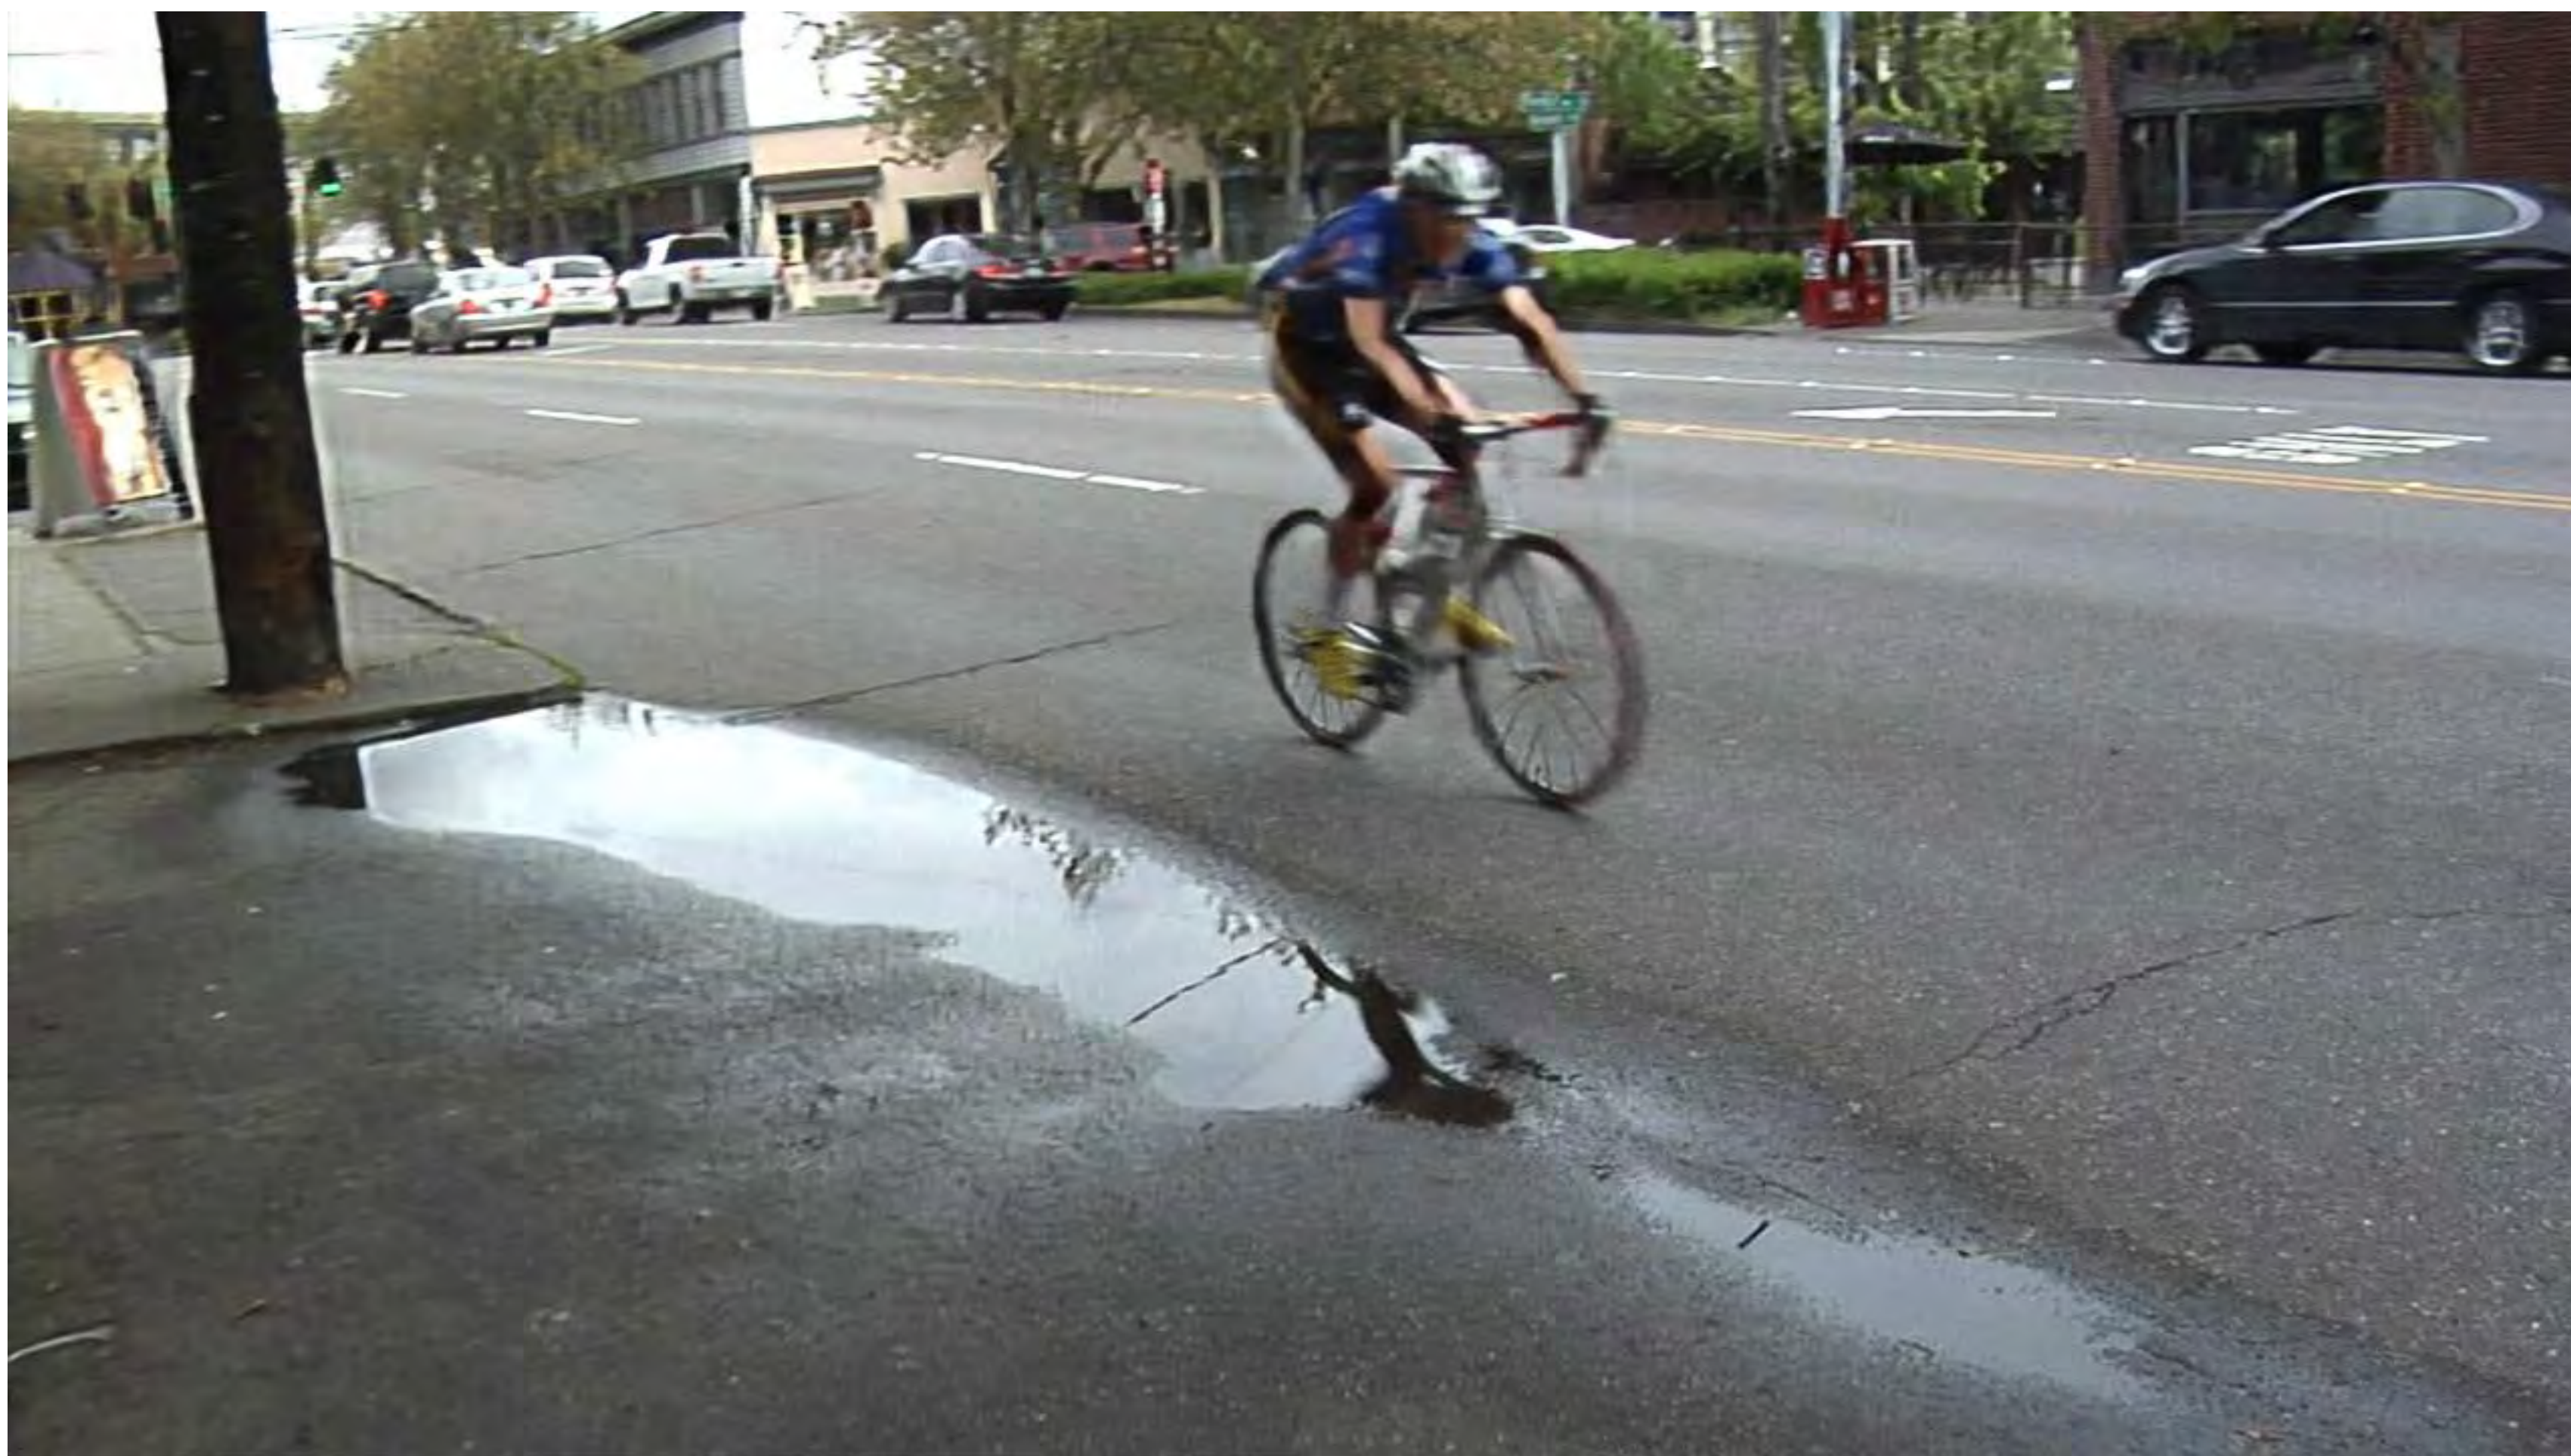

DBN+Noalign



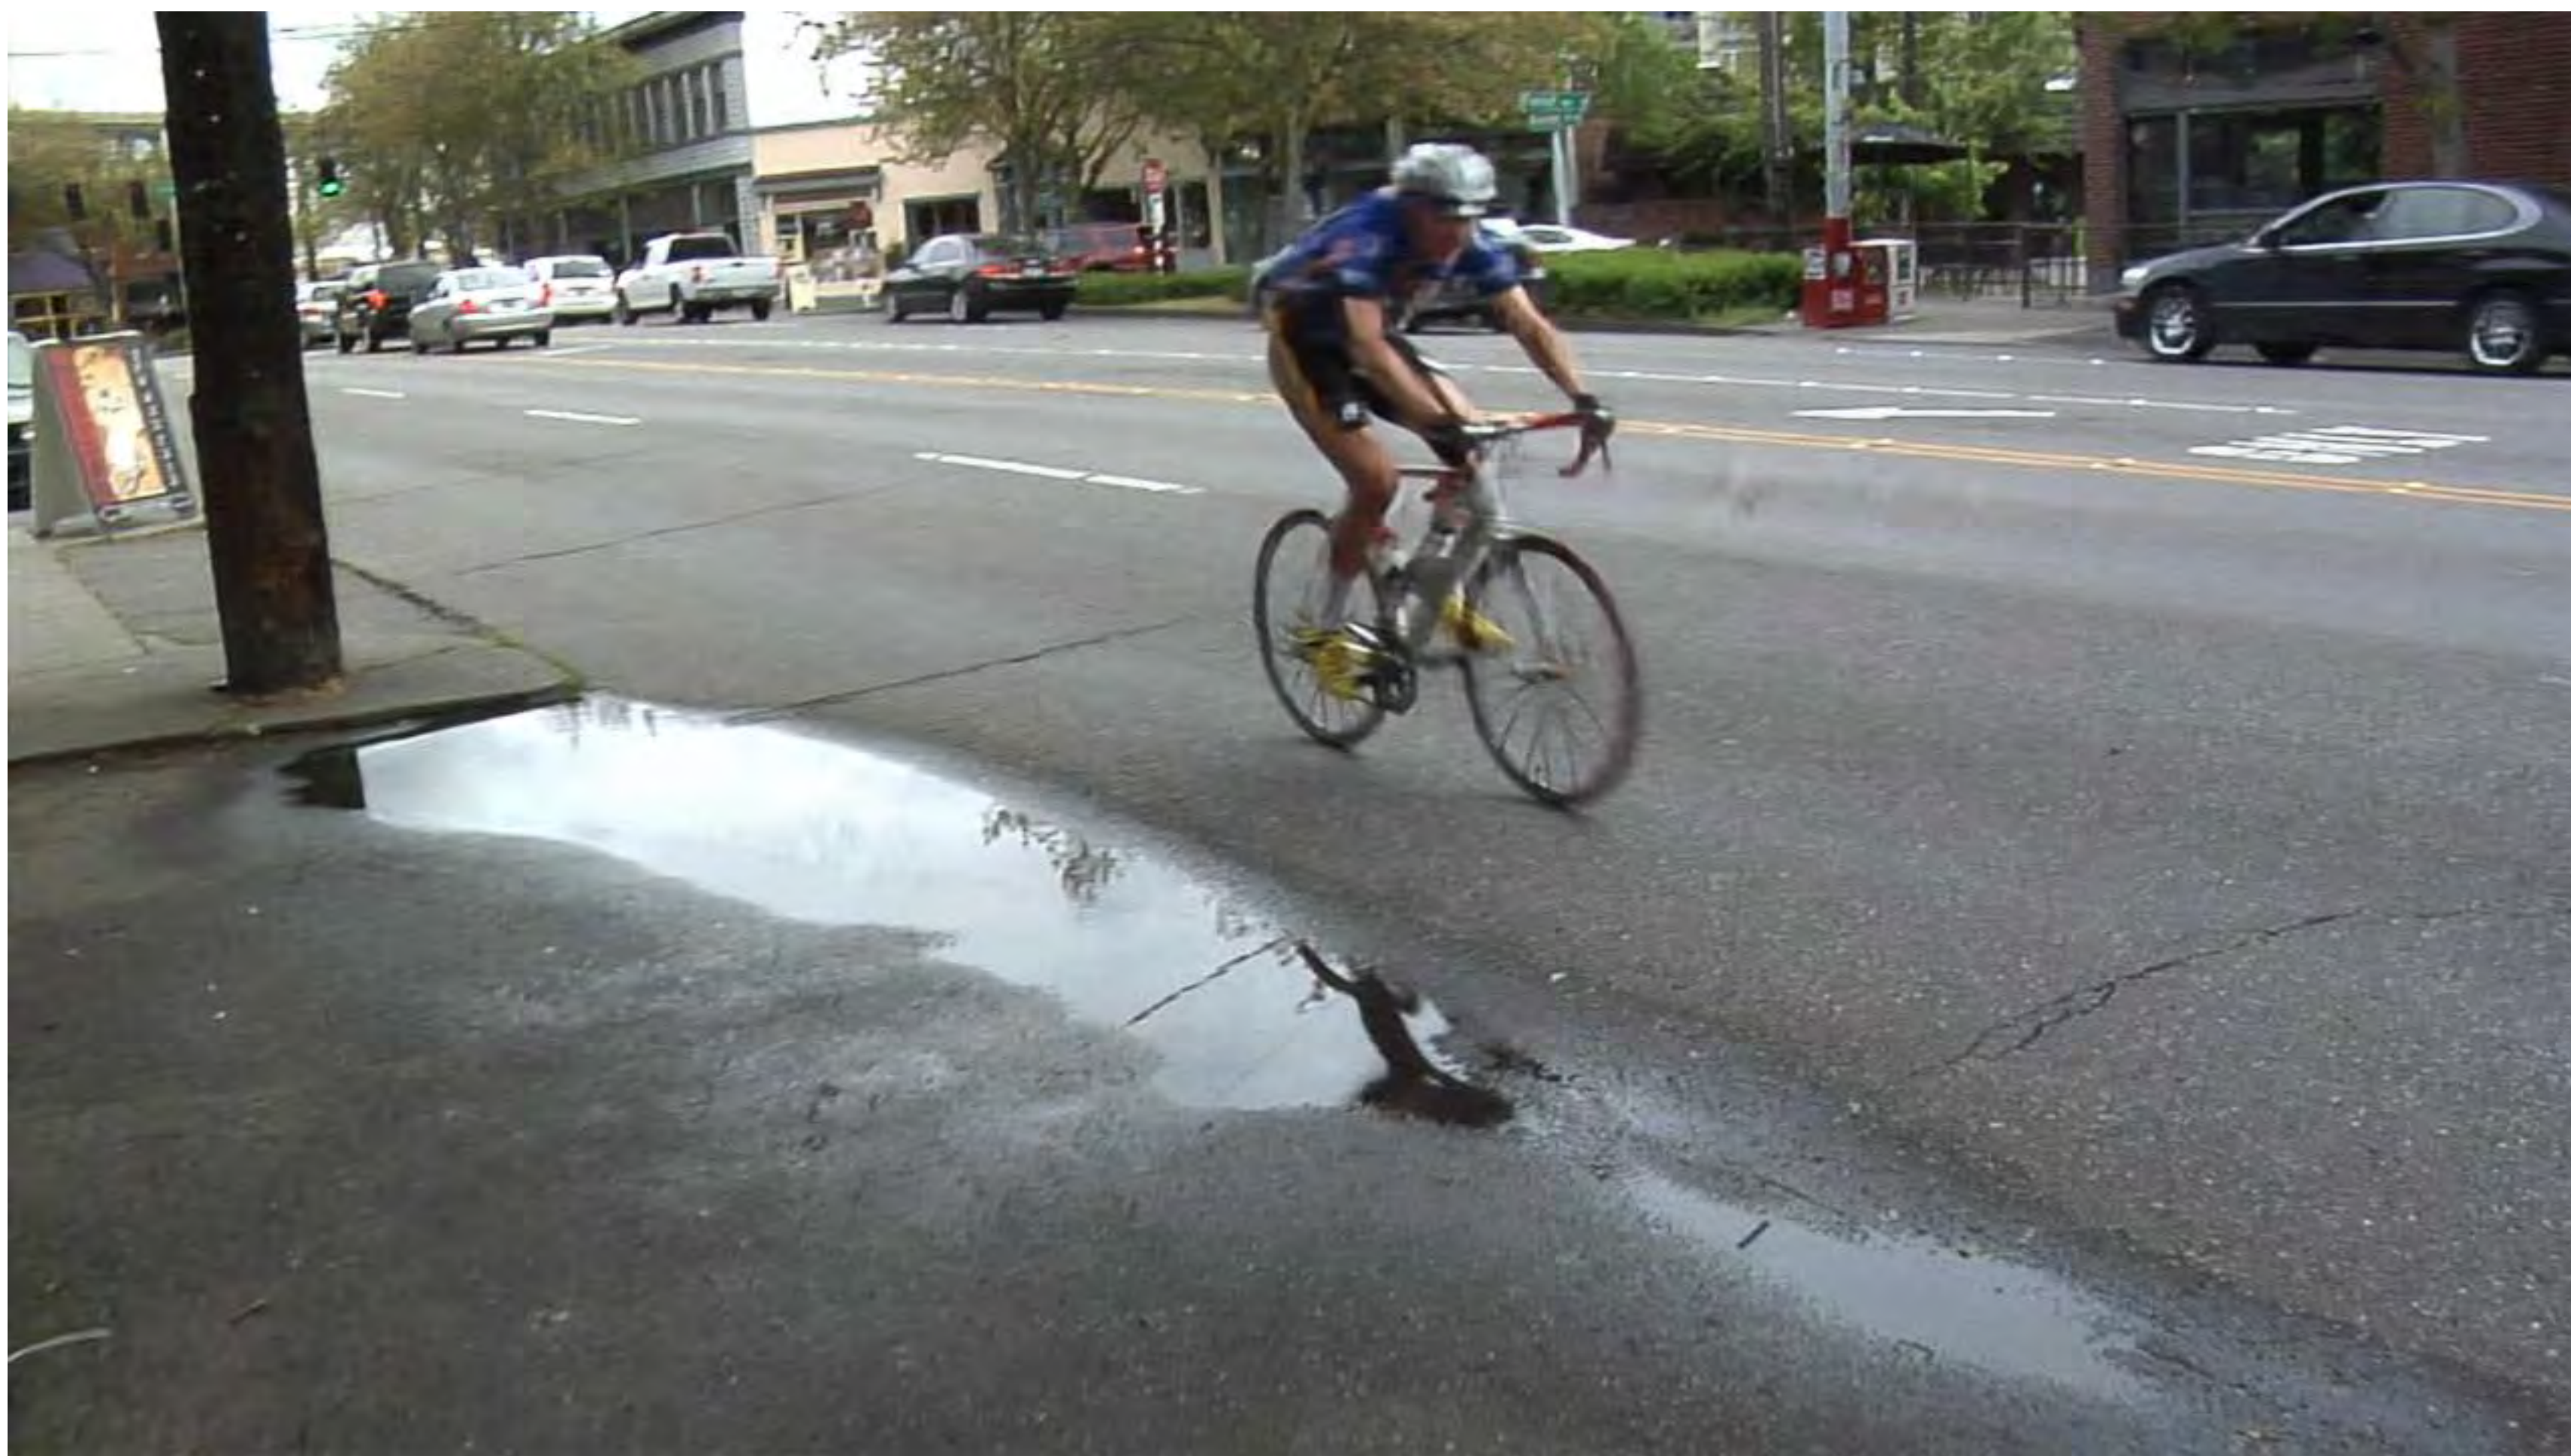

DBN+Homog



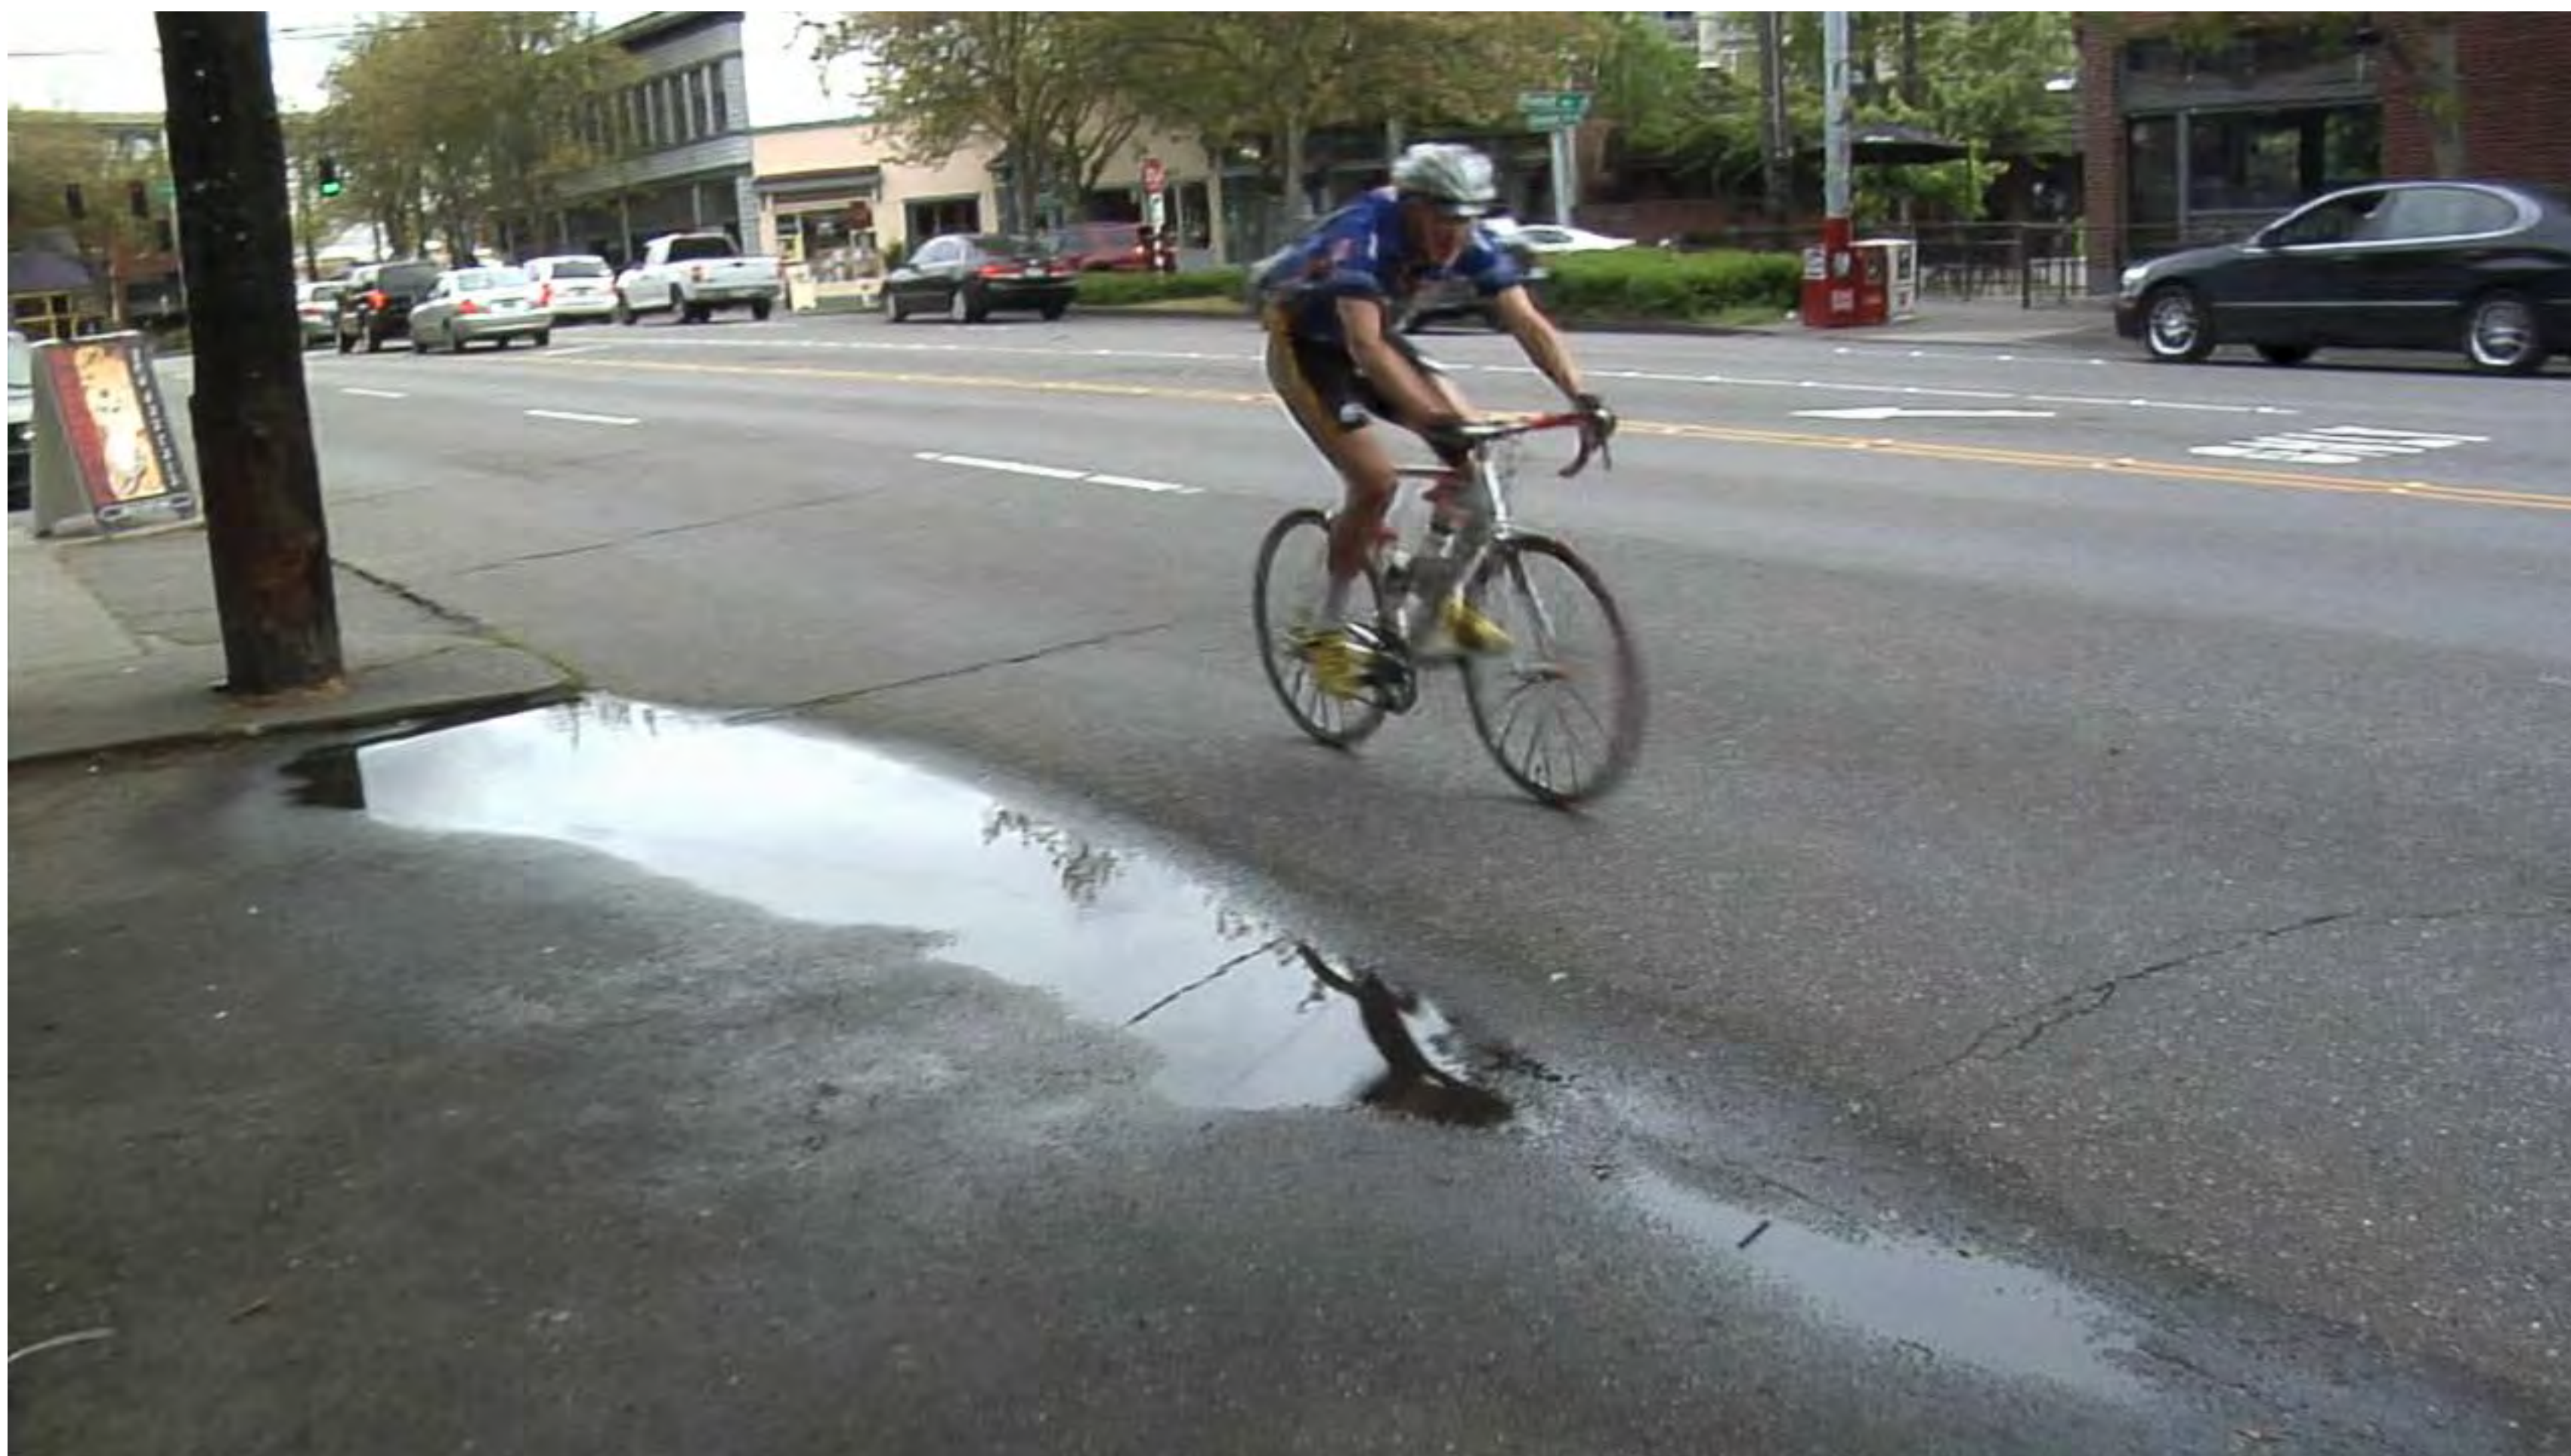

DBN+Flow



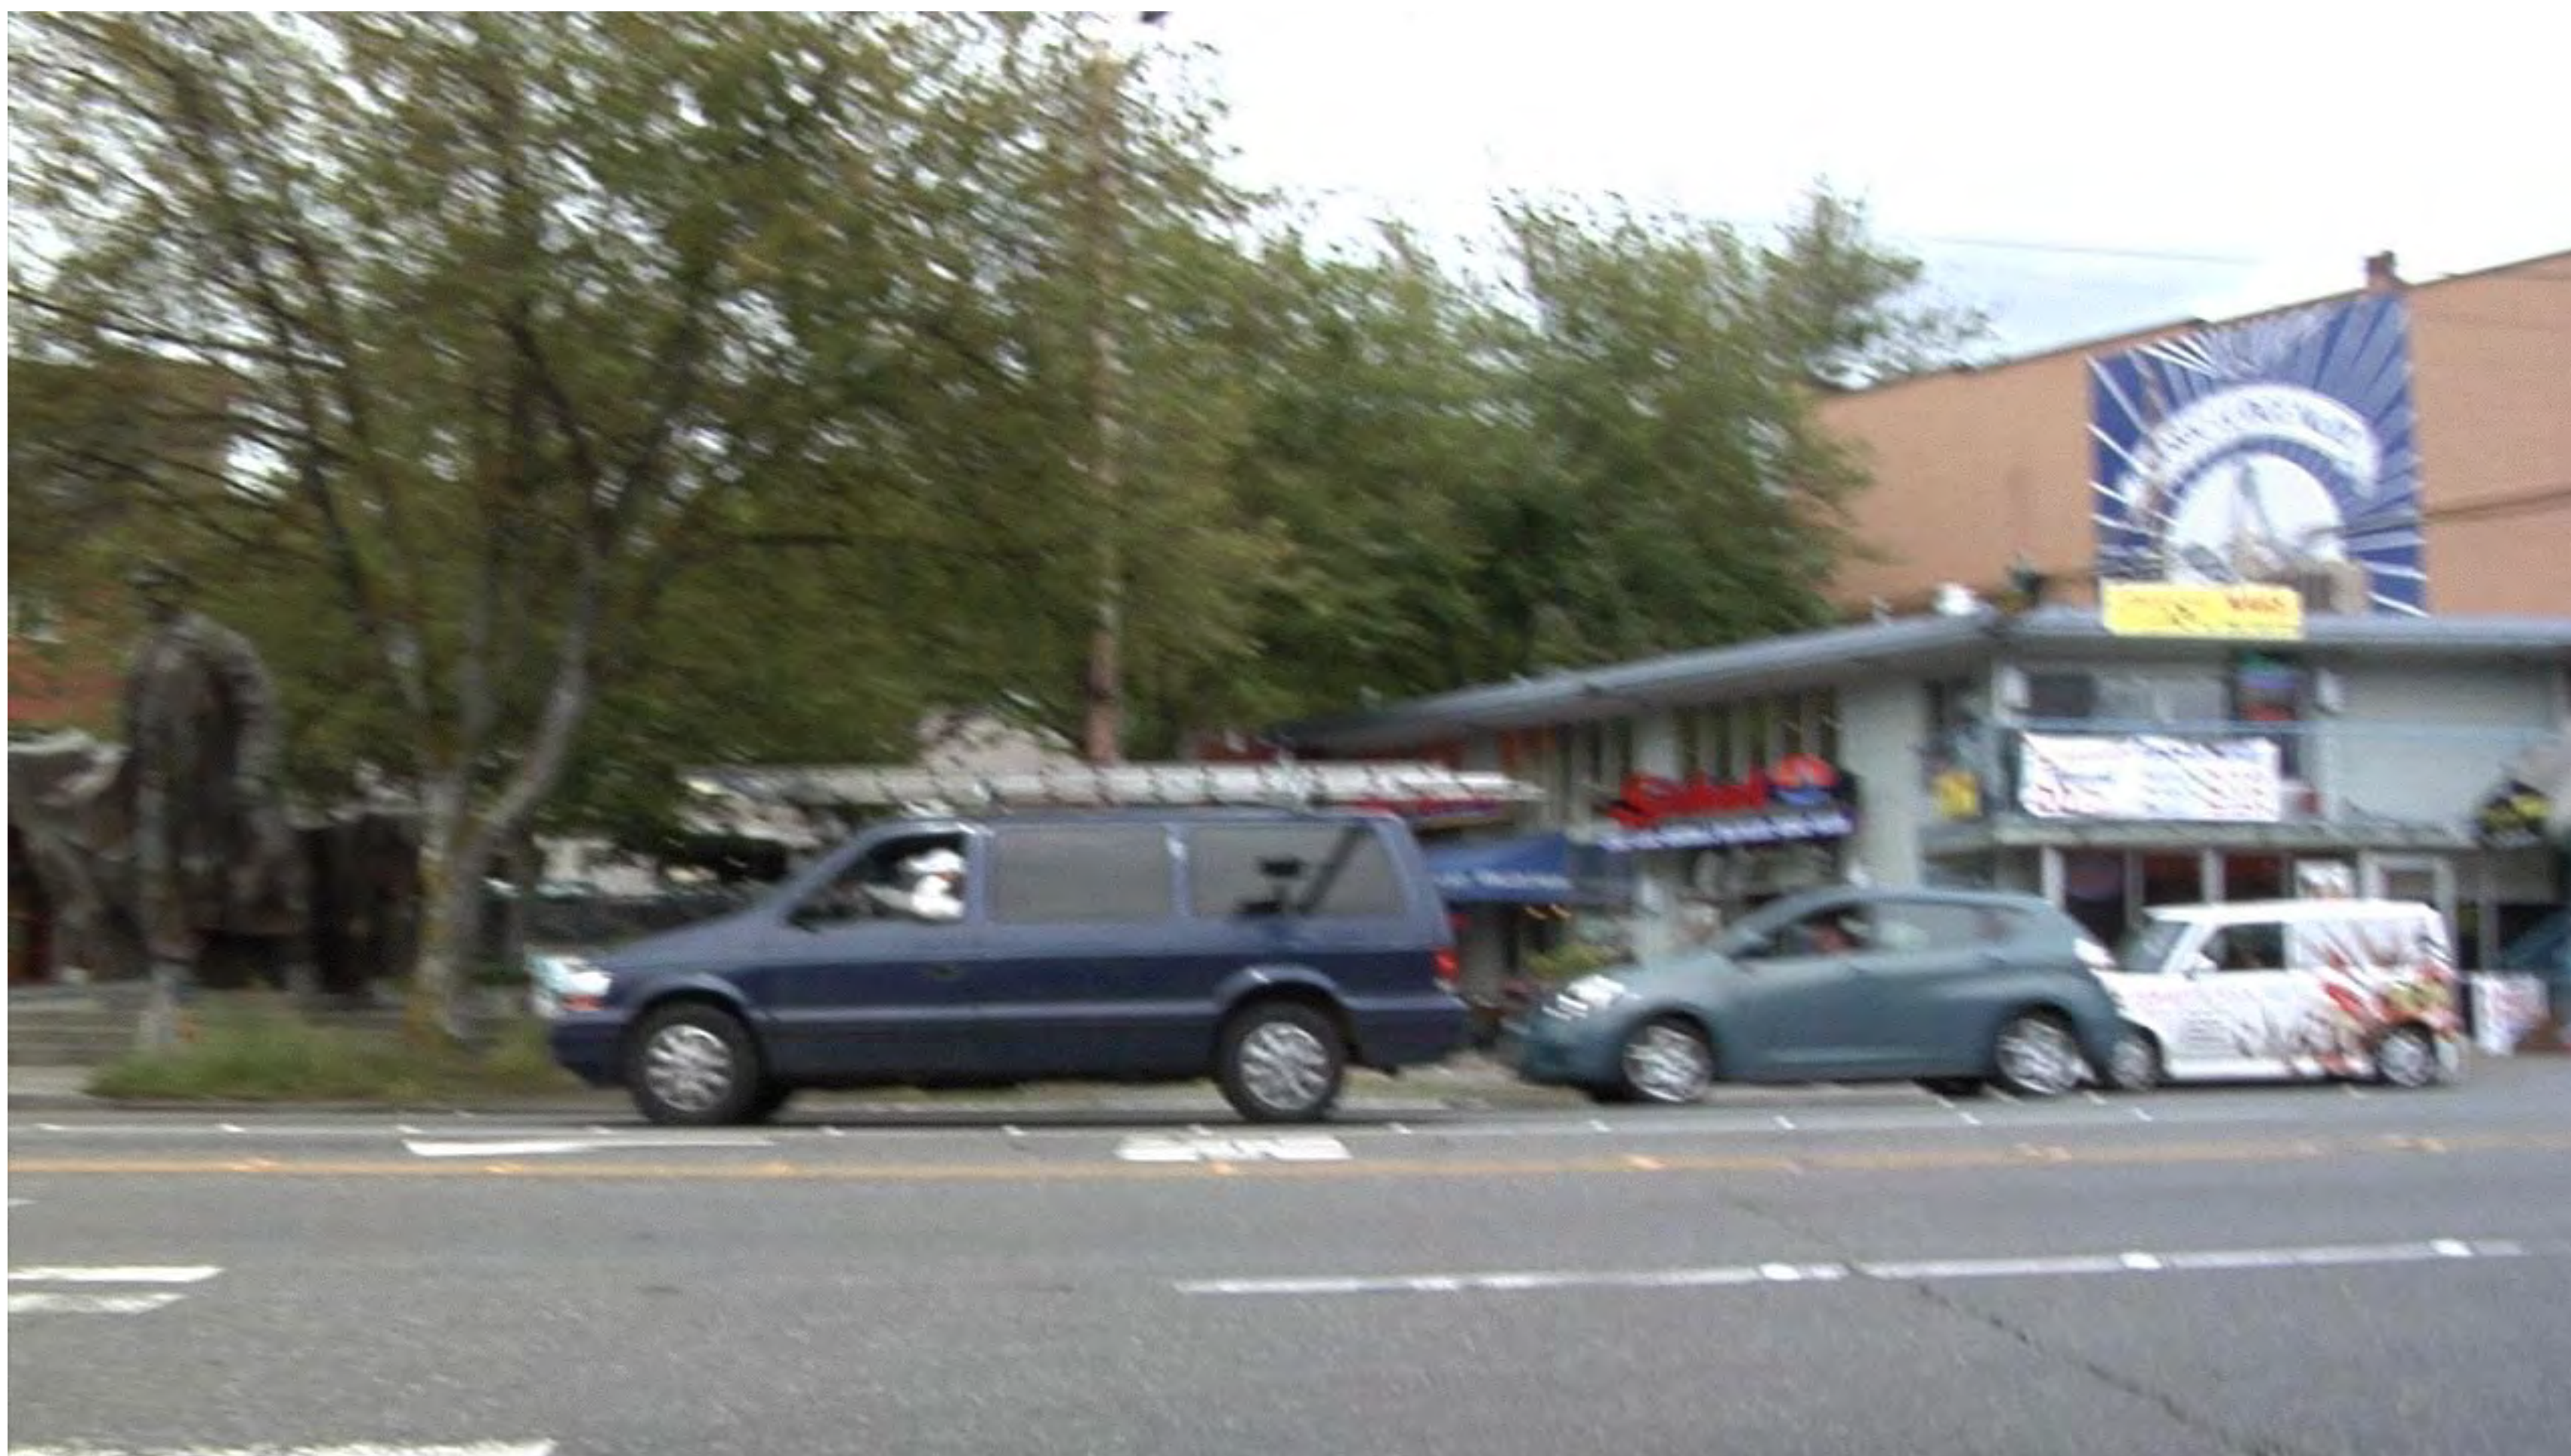

input



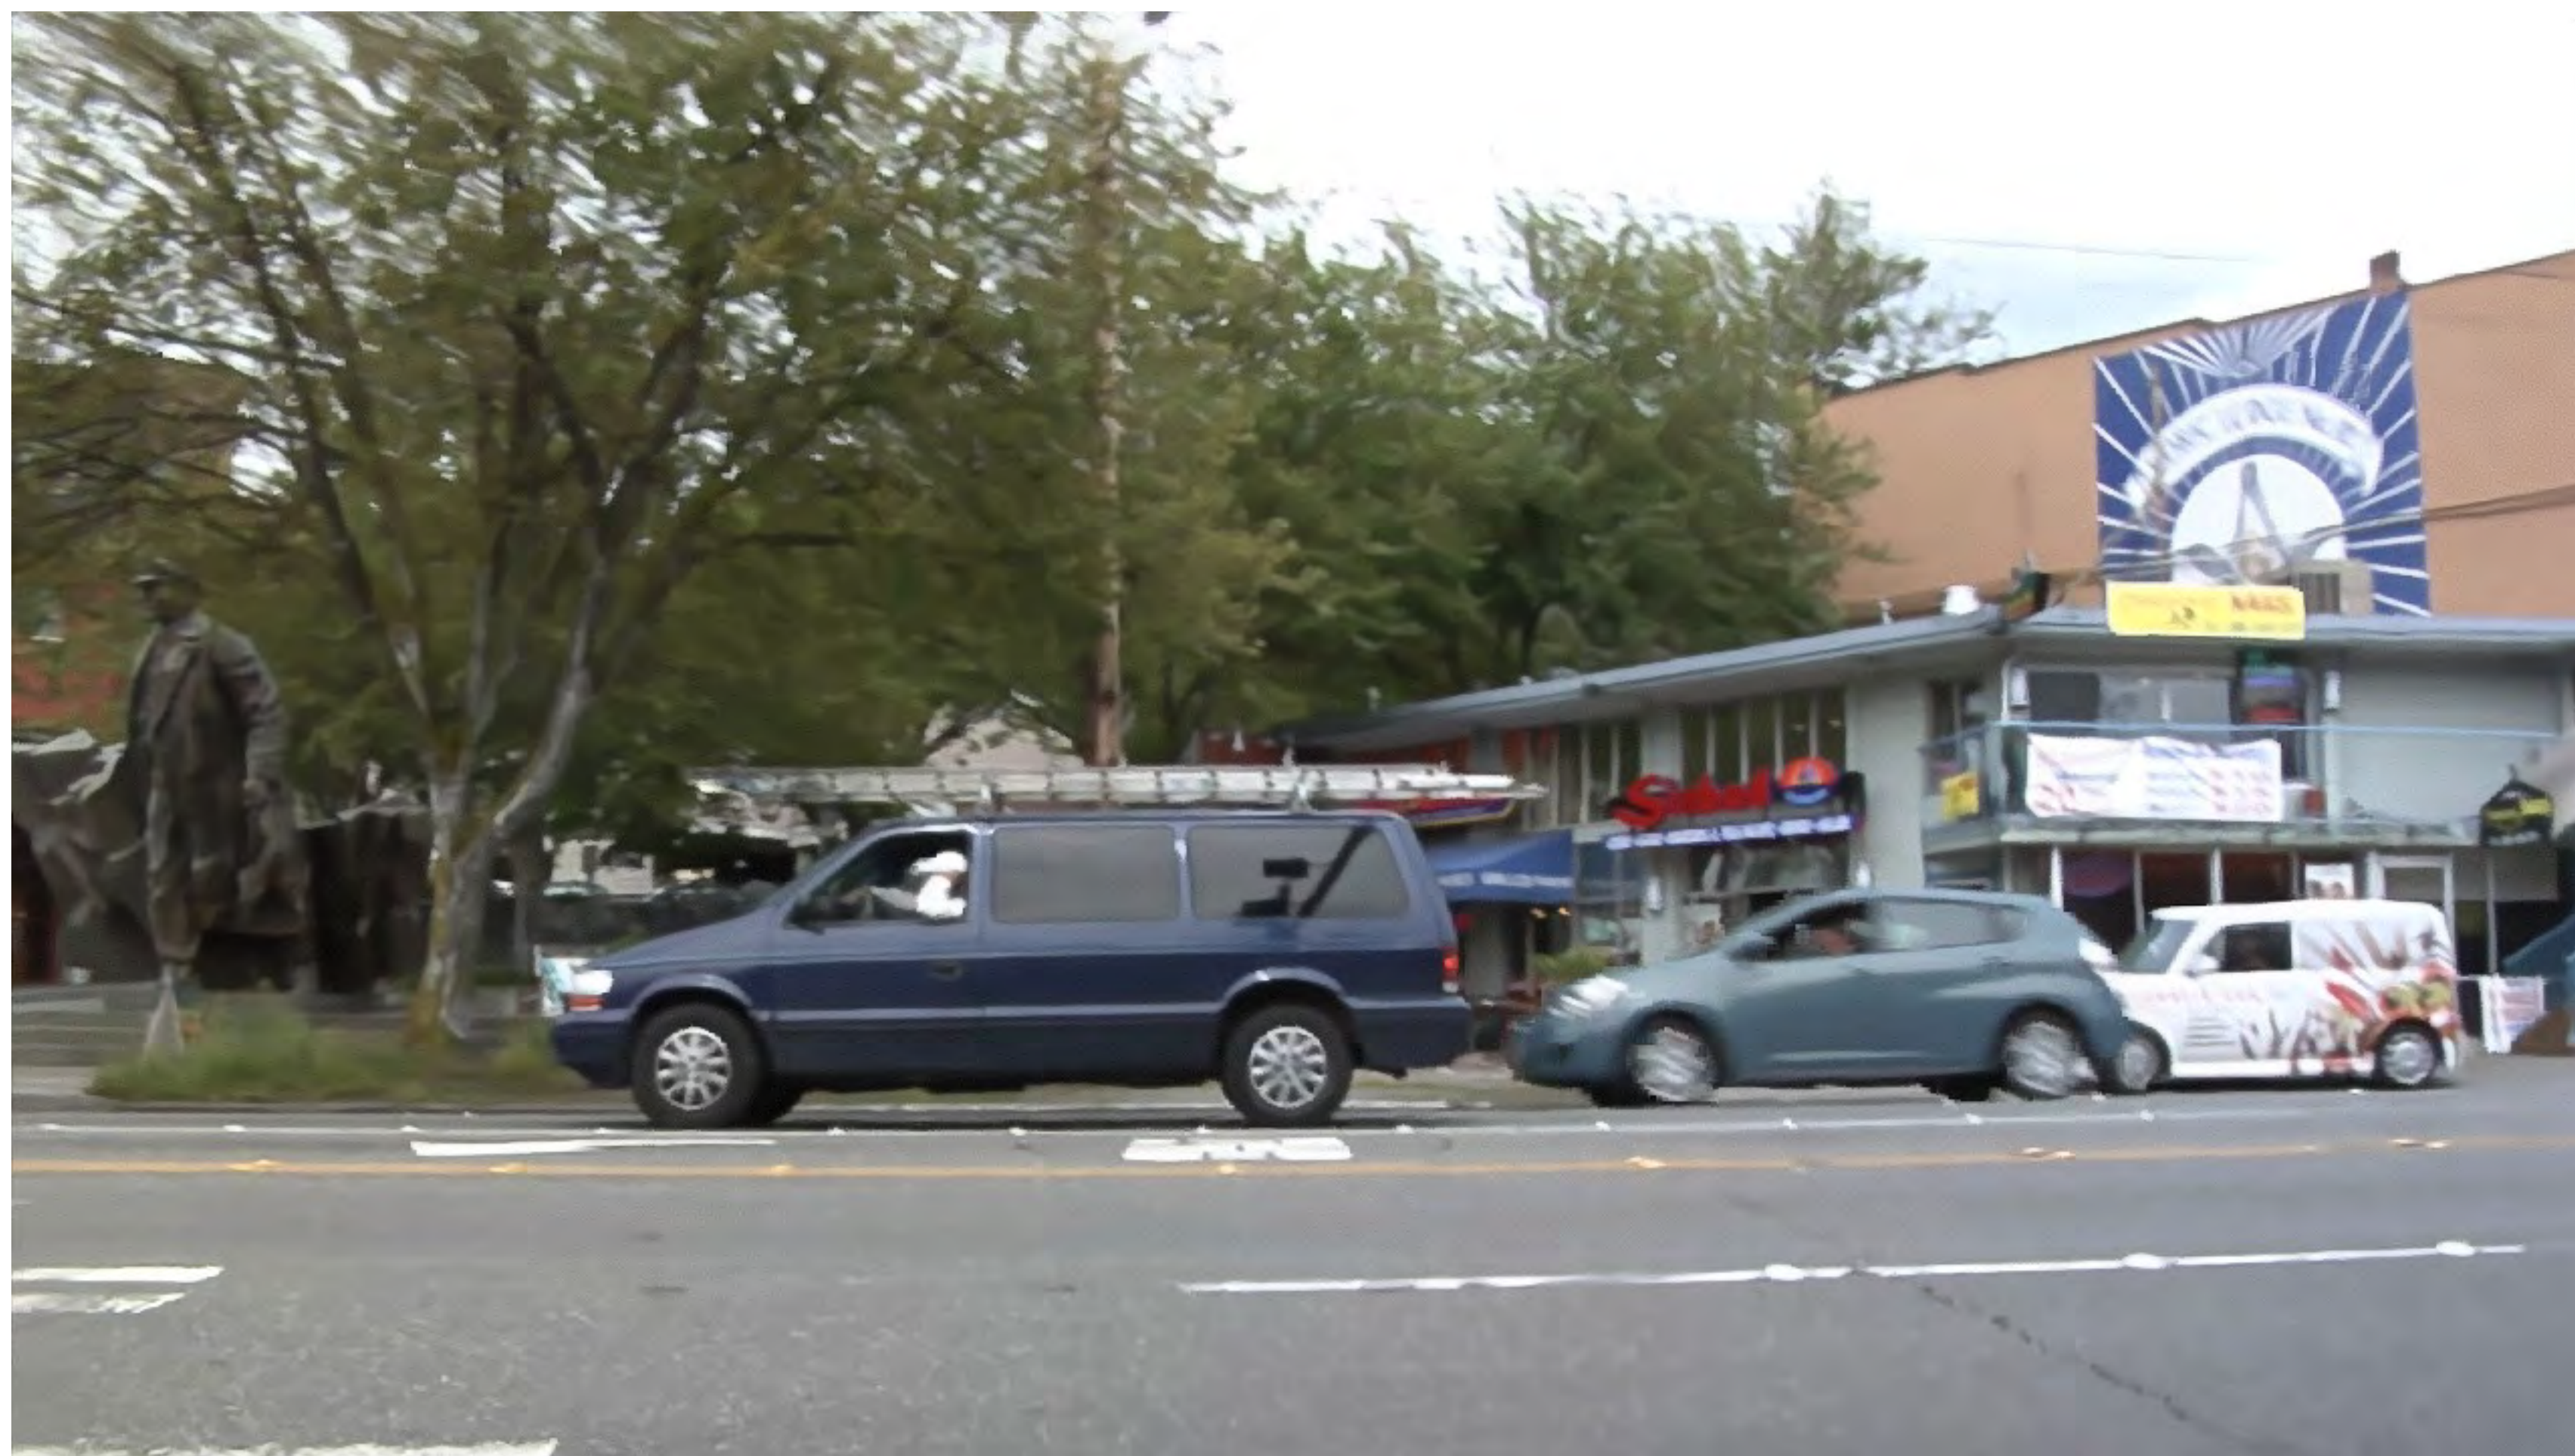

Cho [3]



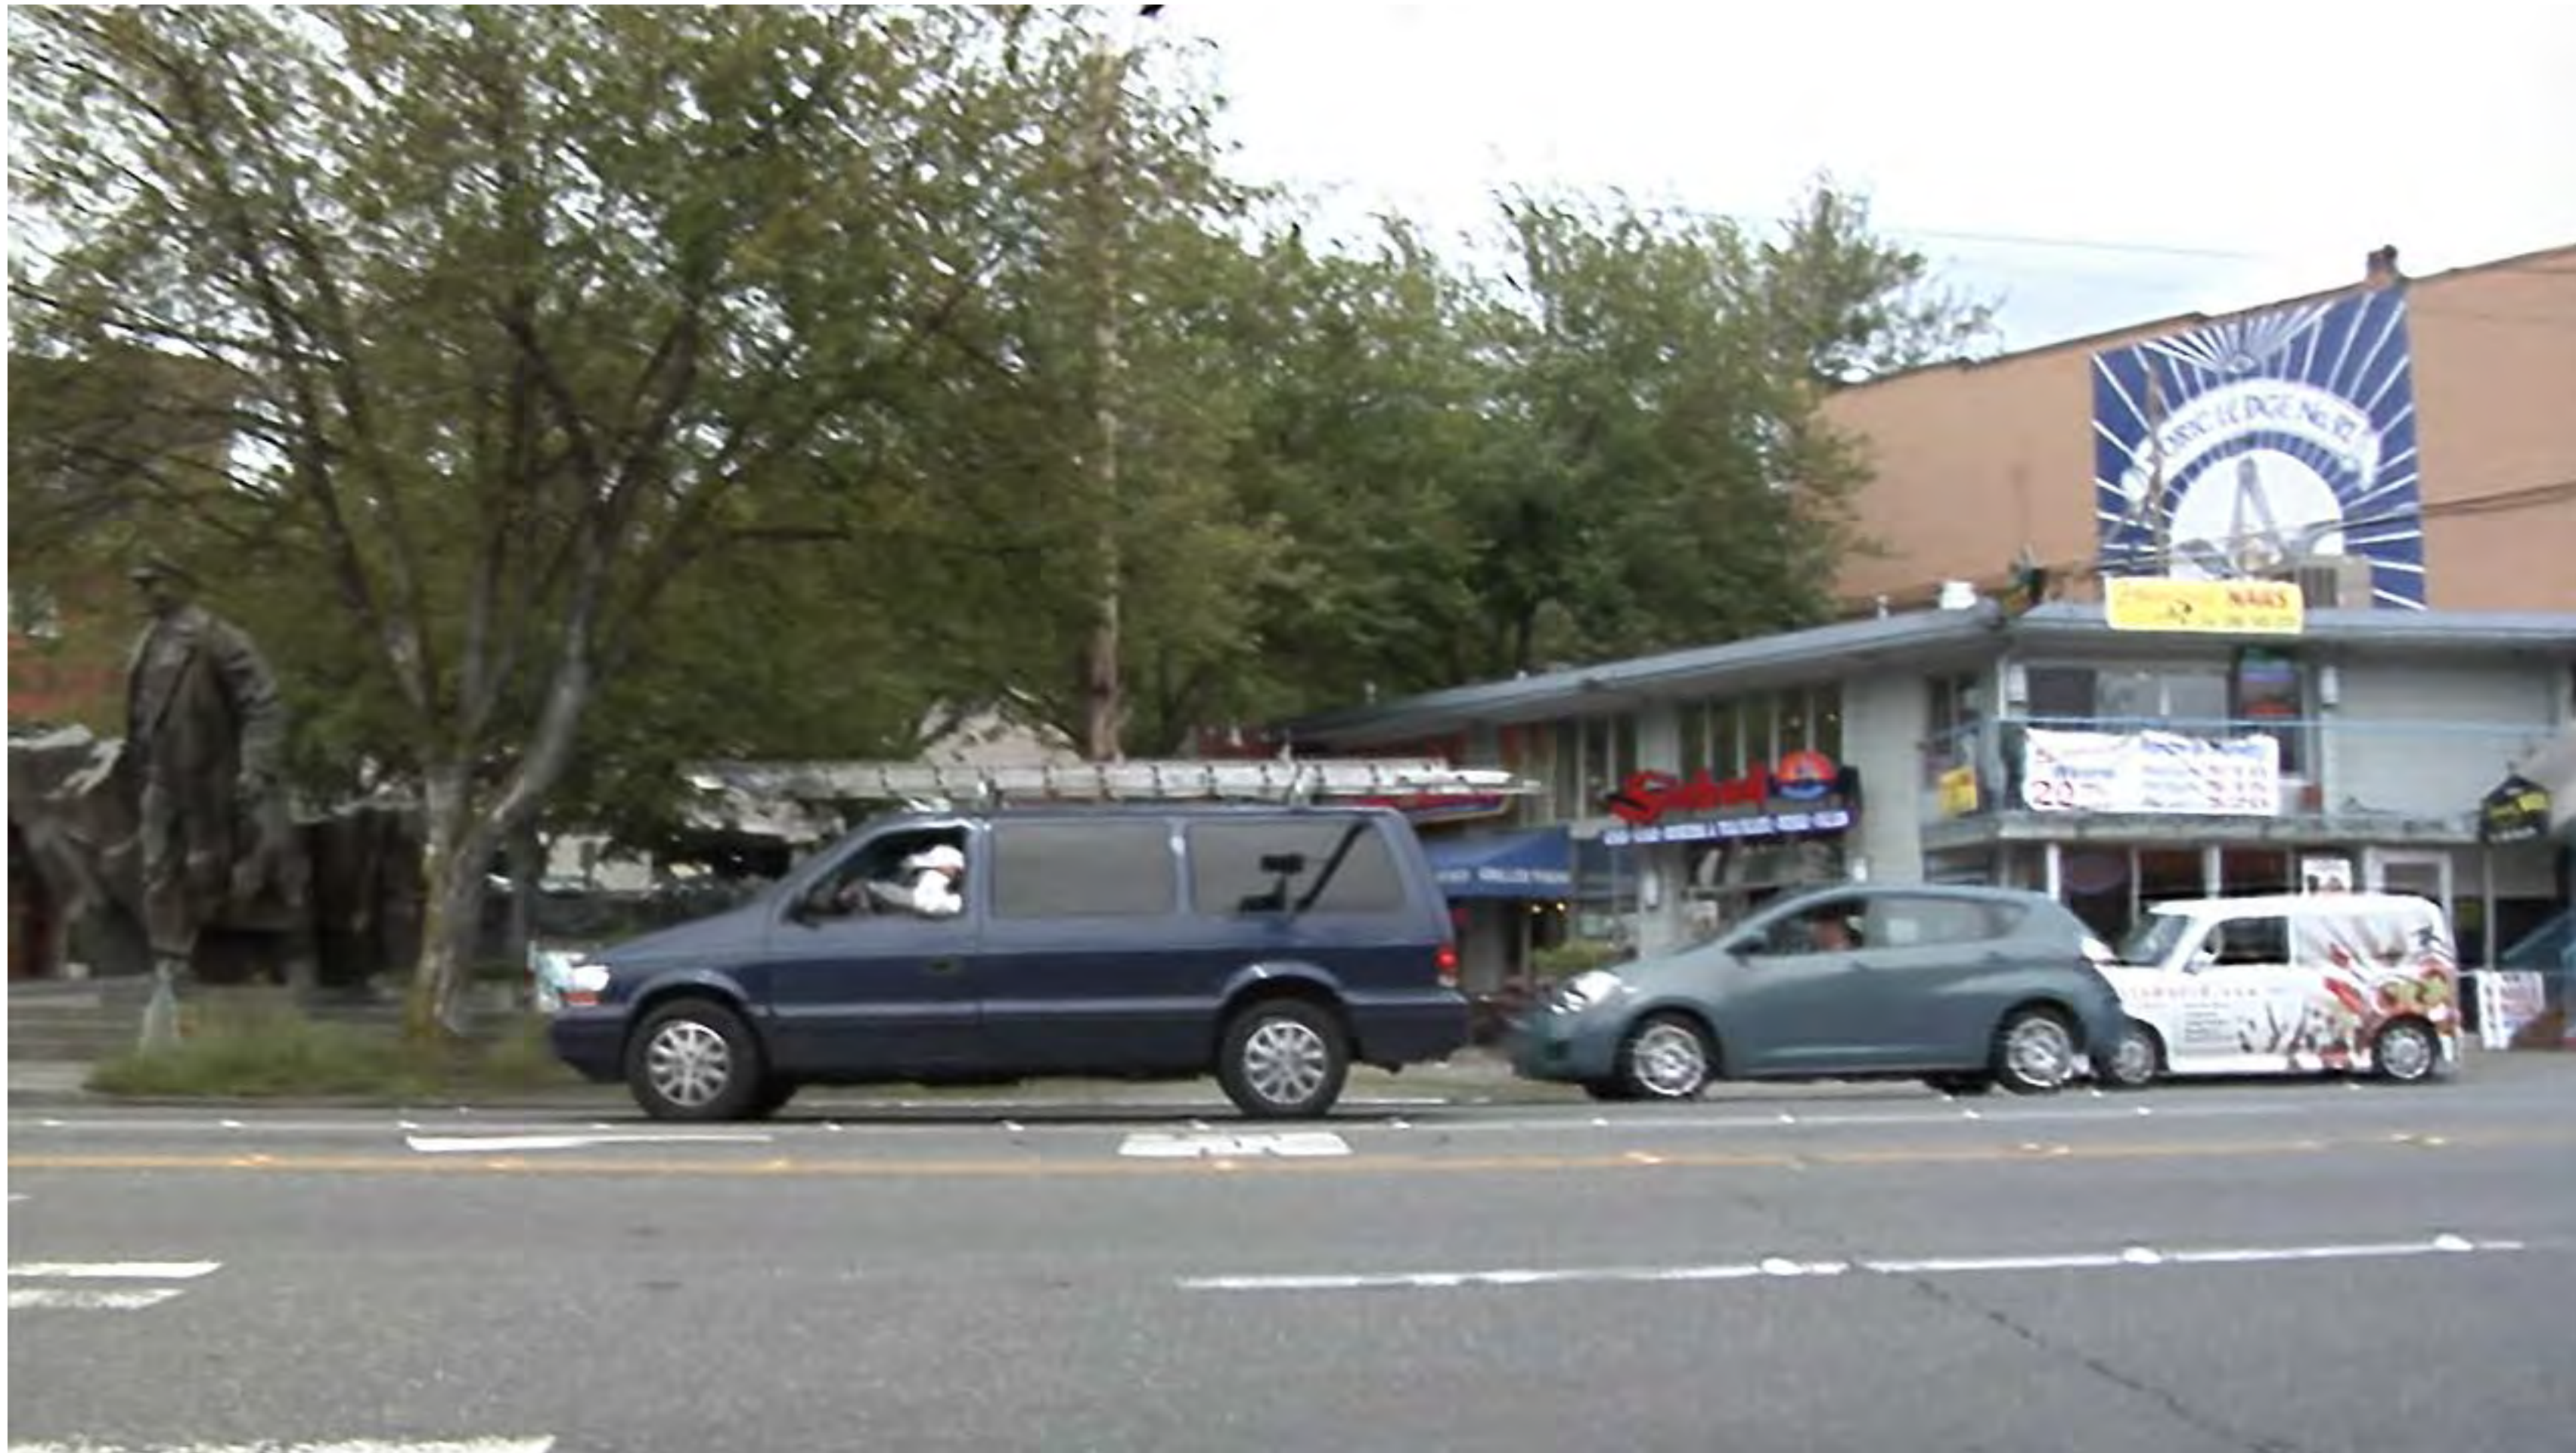

Kim and Lee [15]



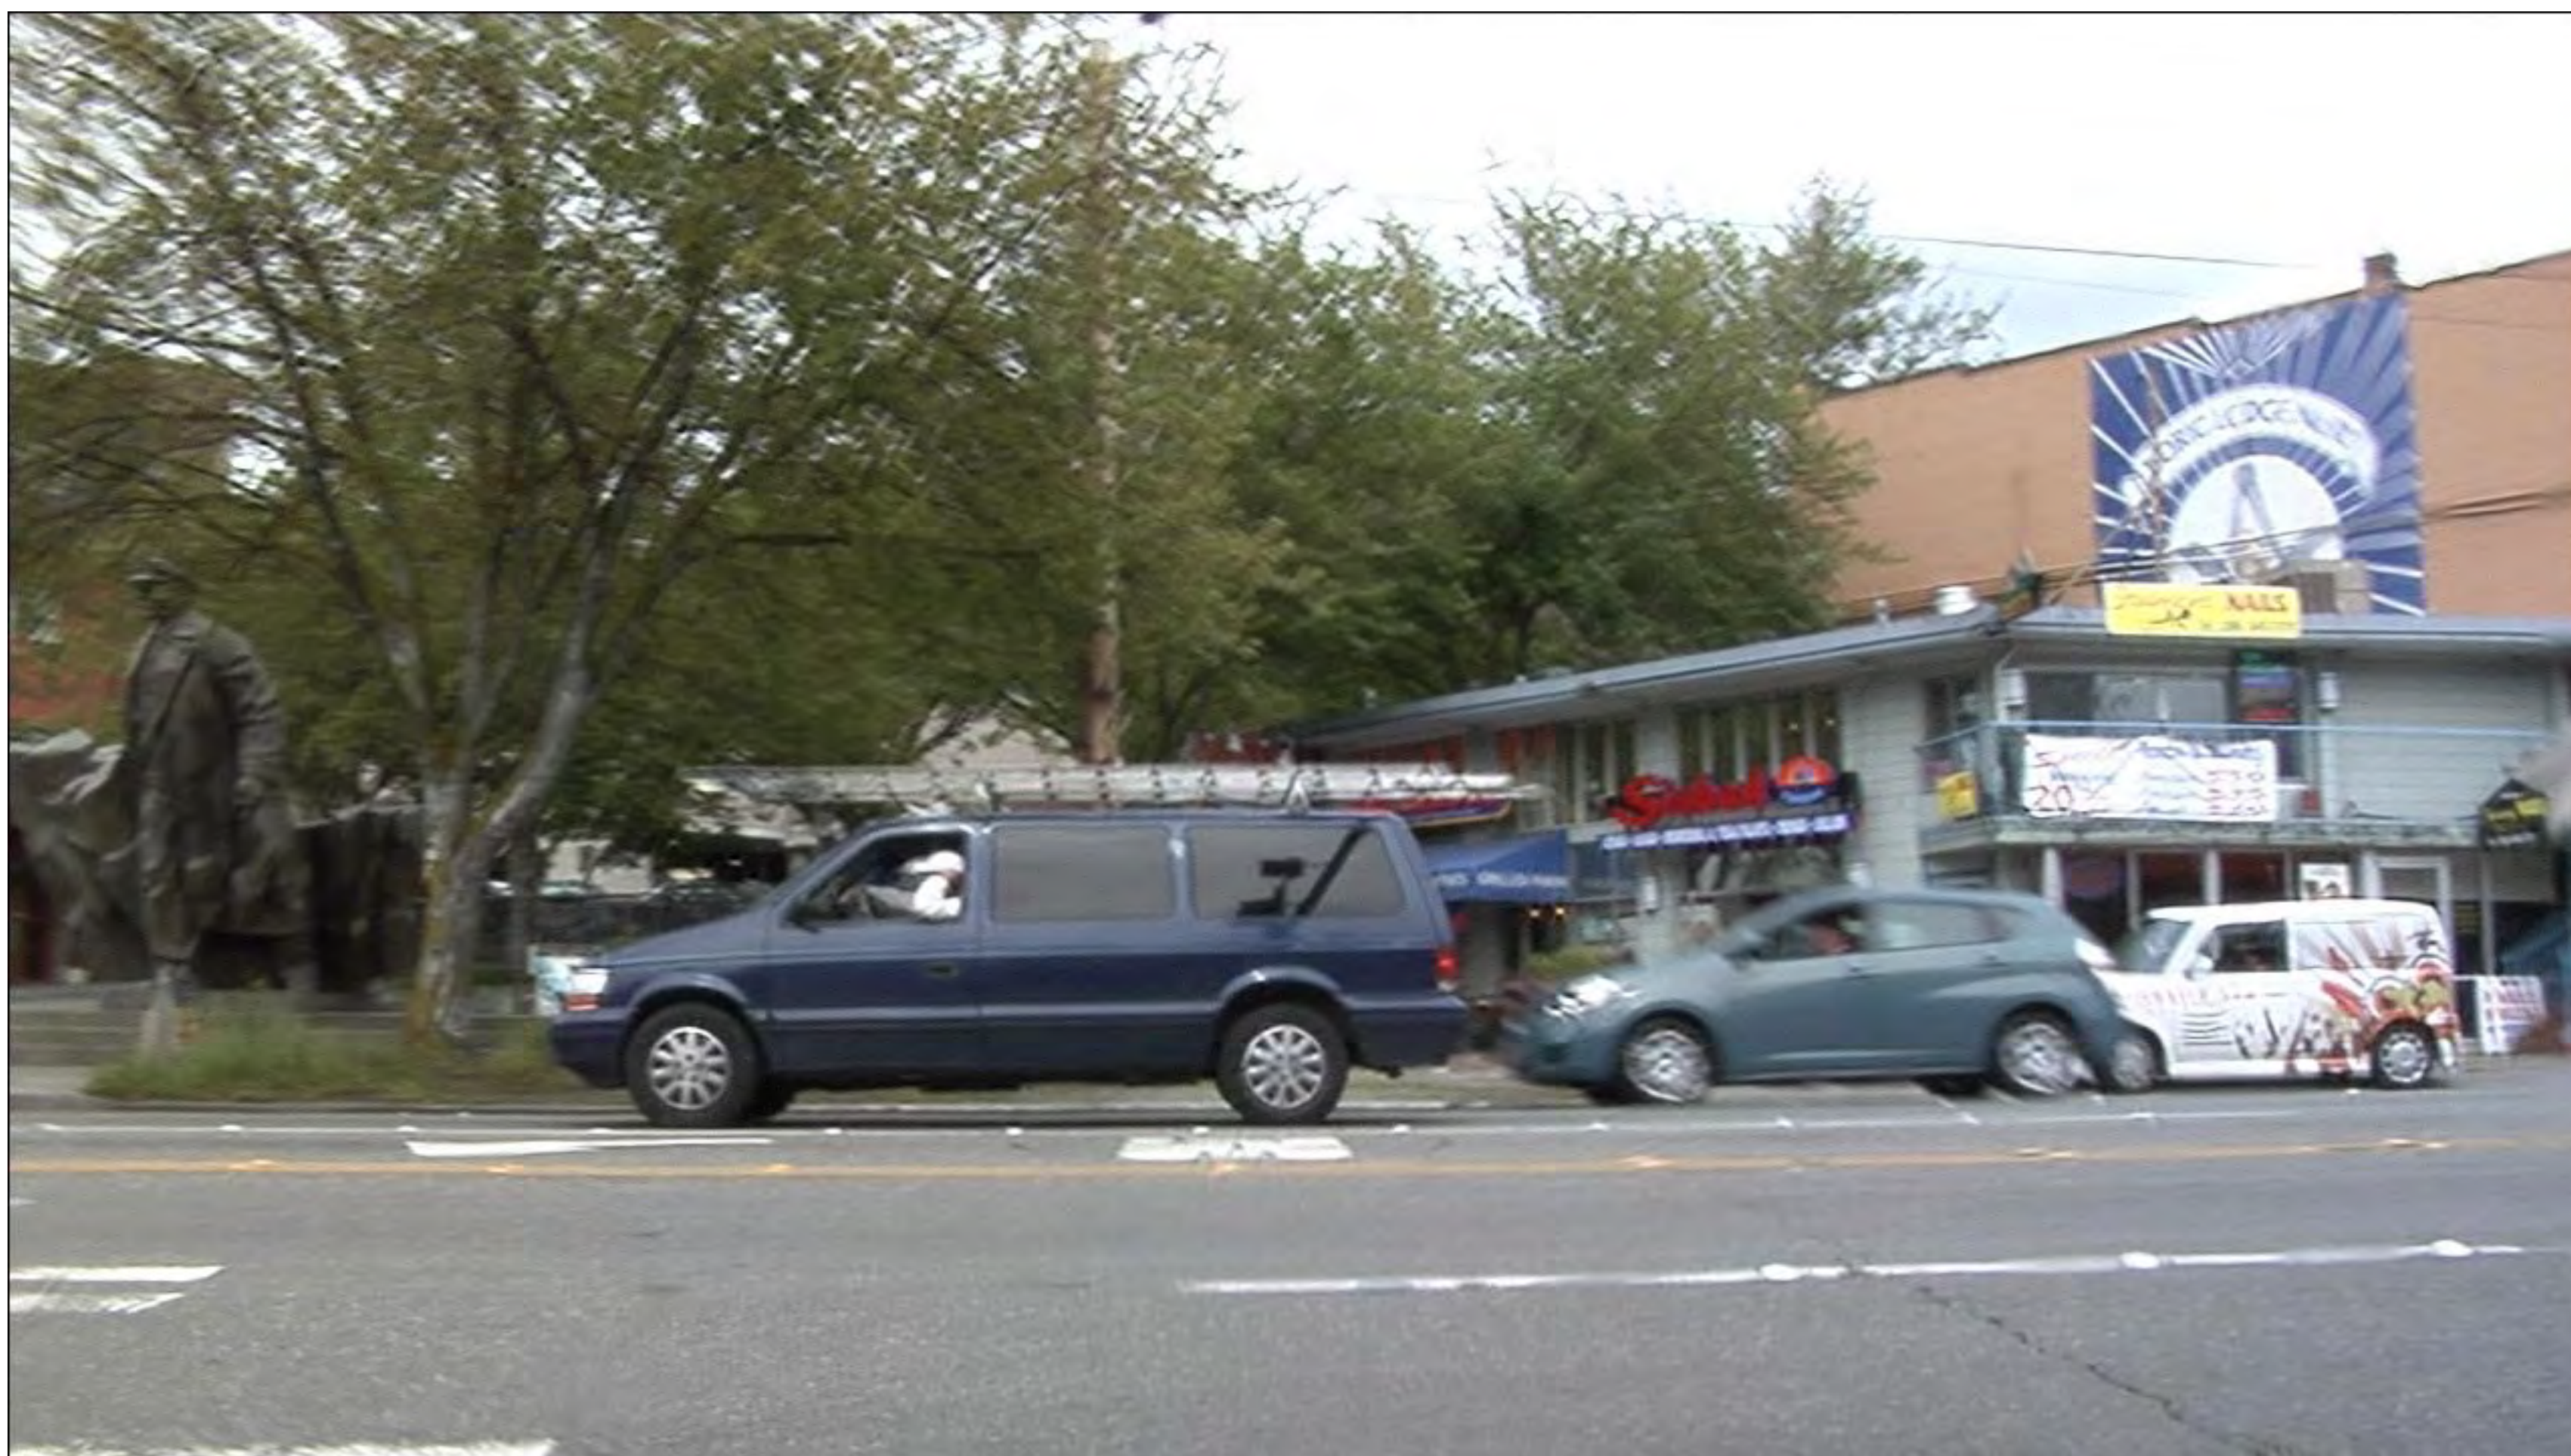

WFA [5]



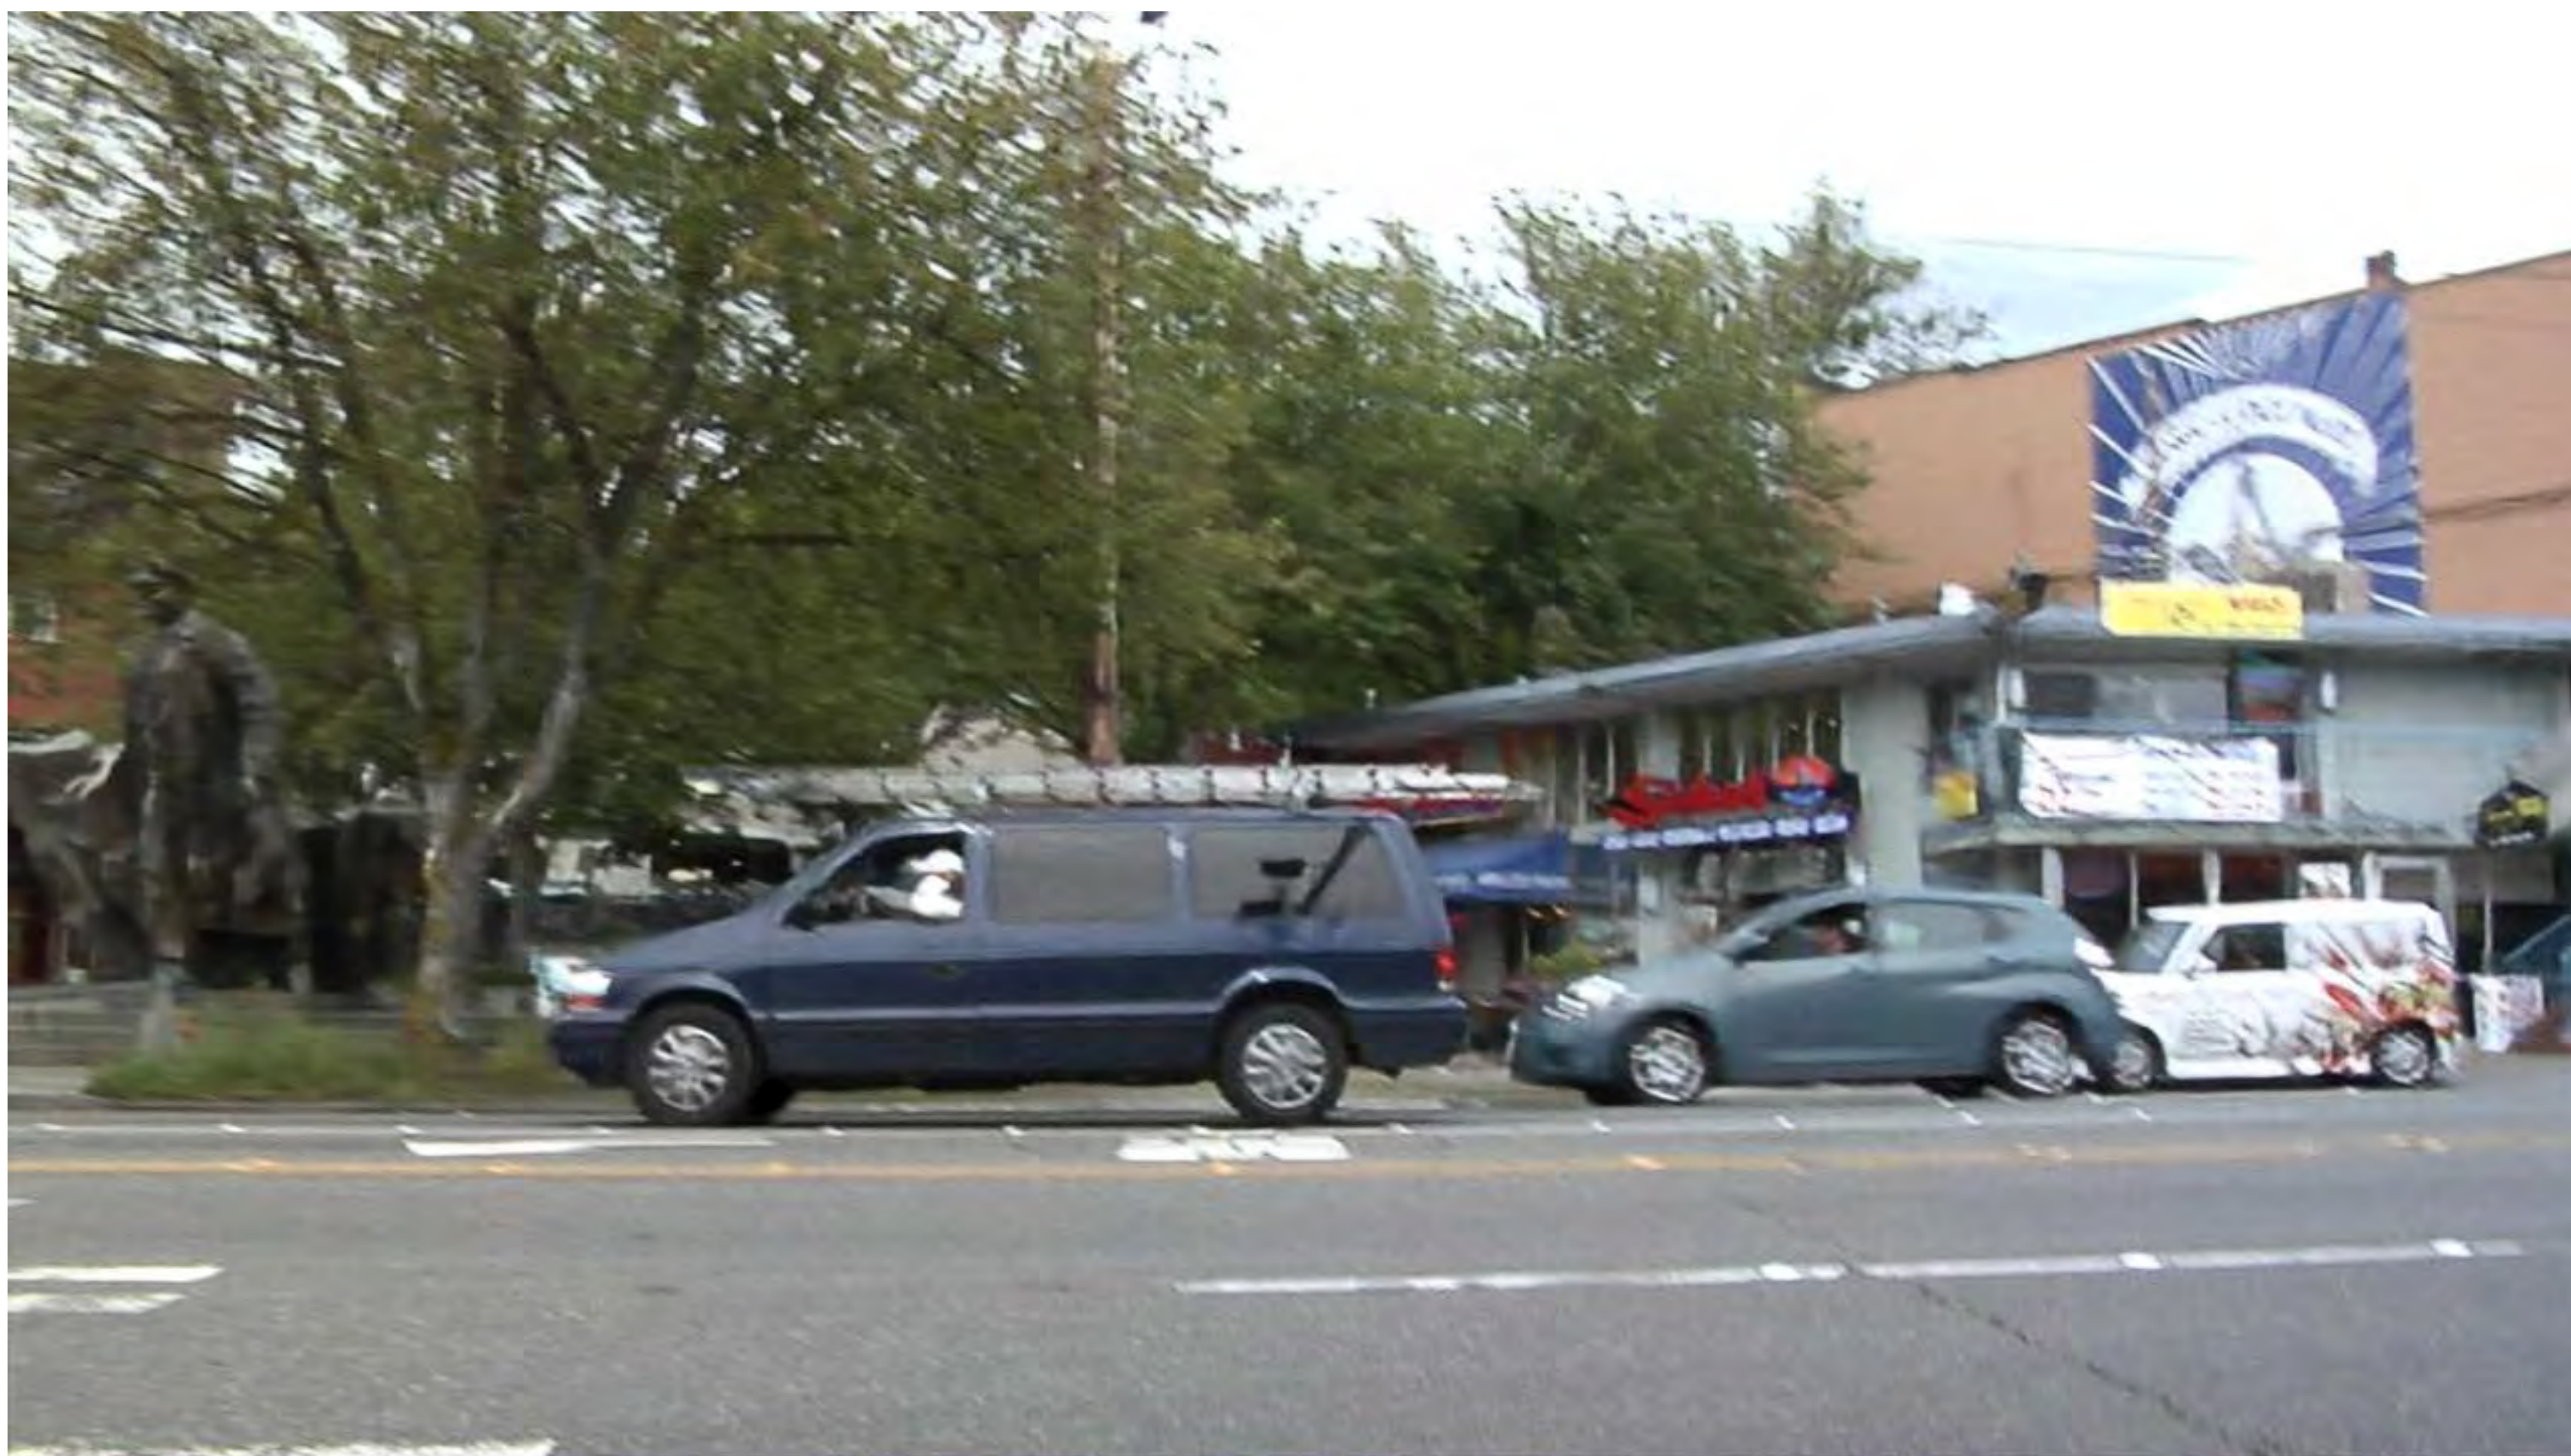

DBN+Single



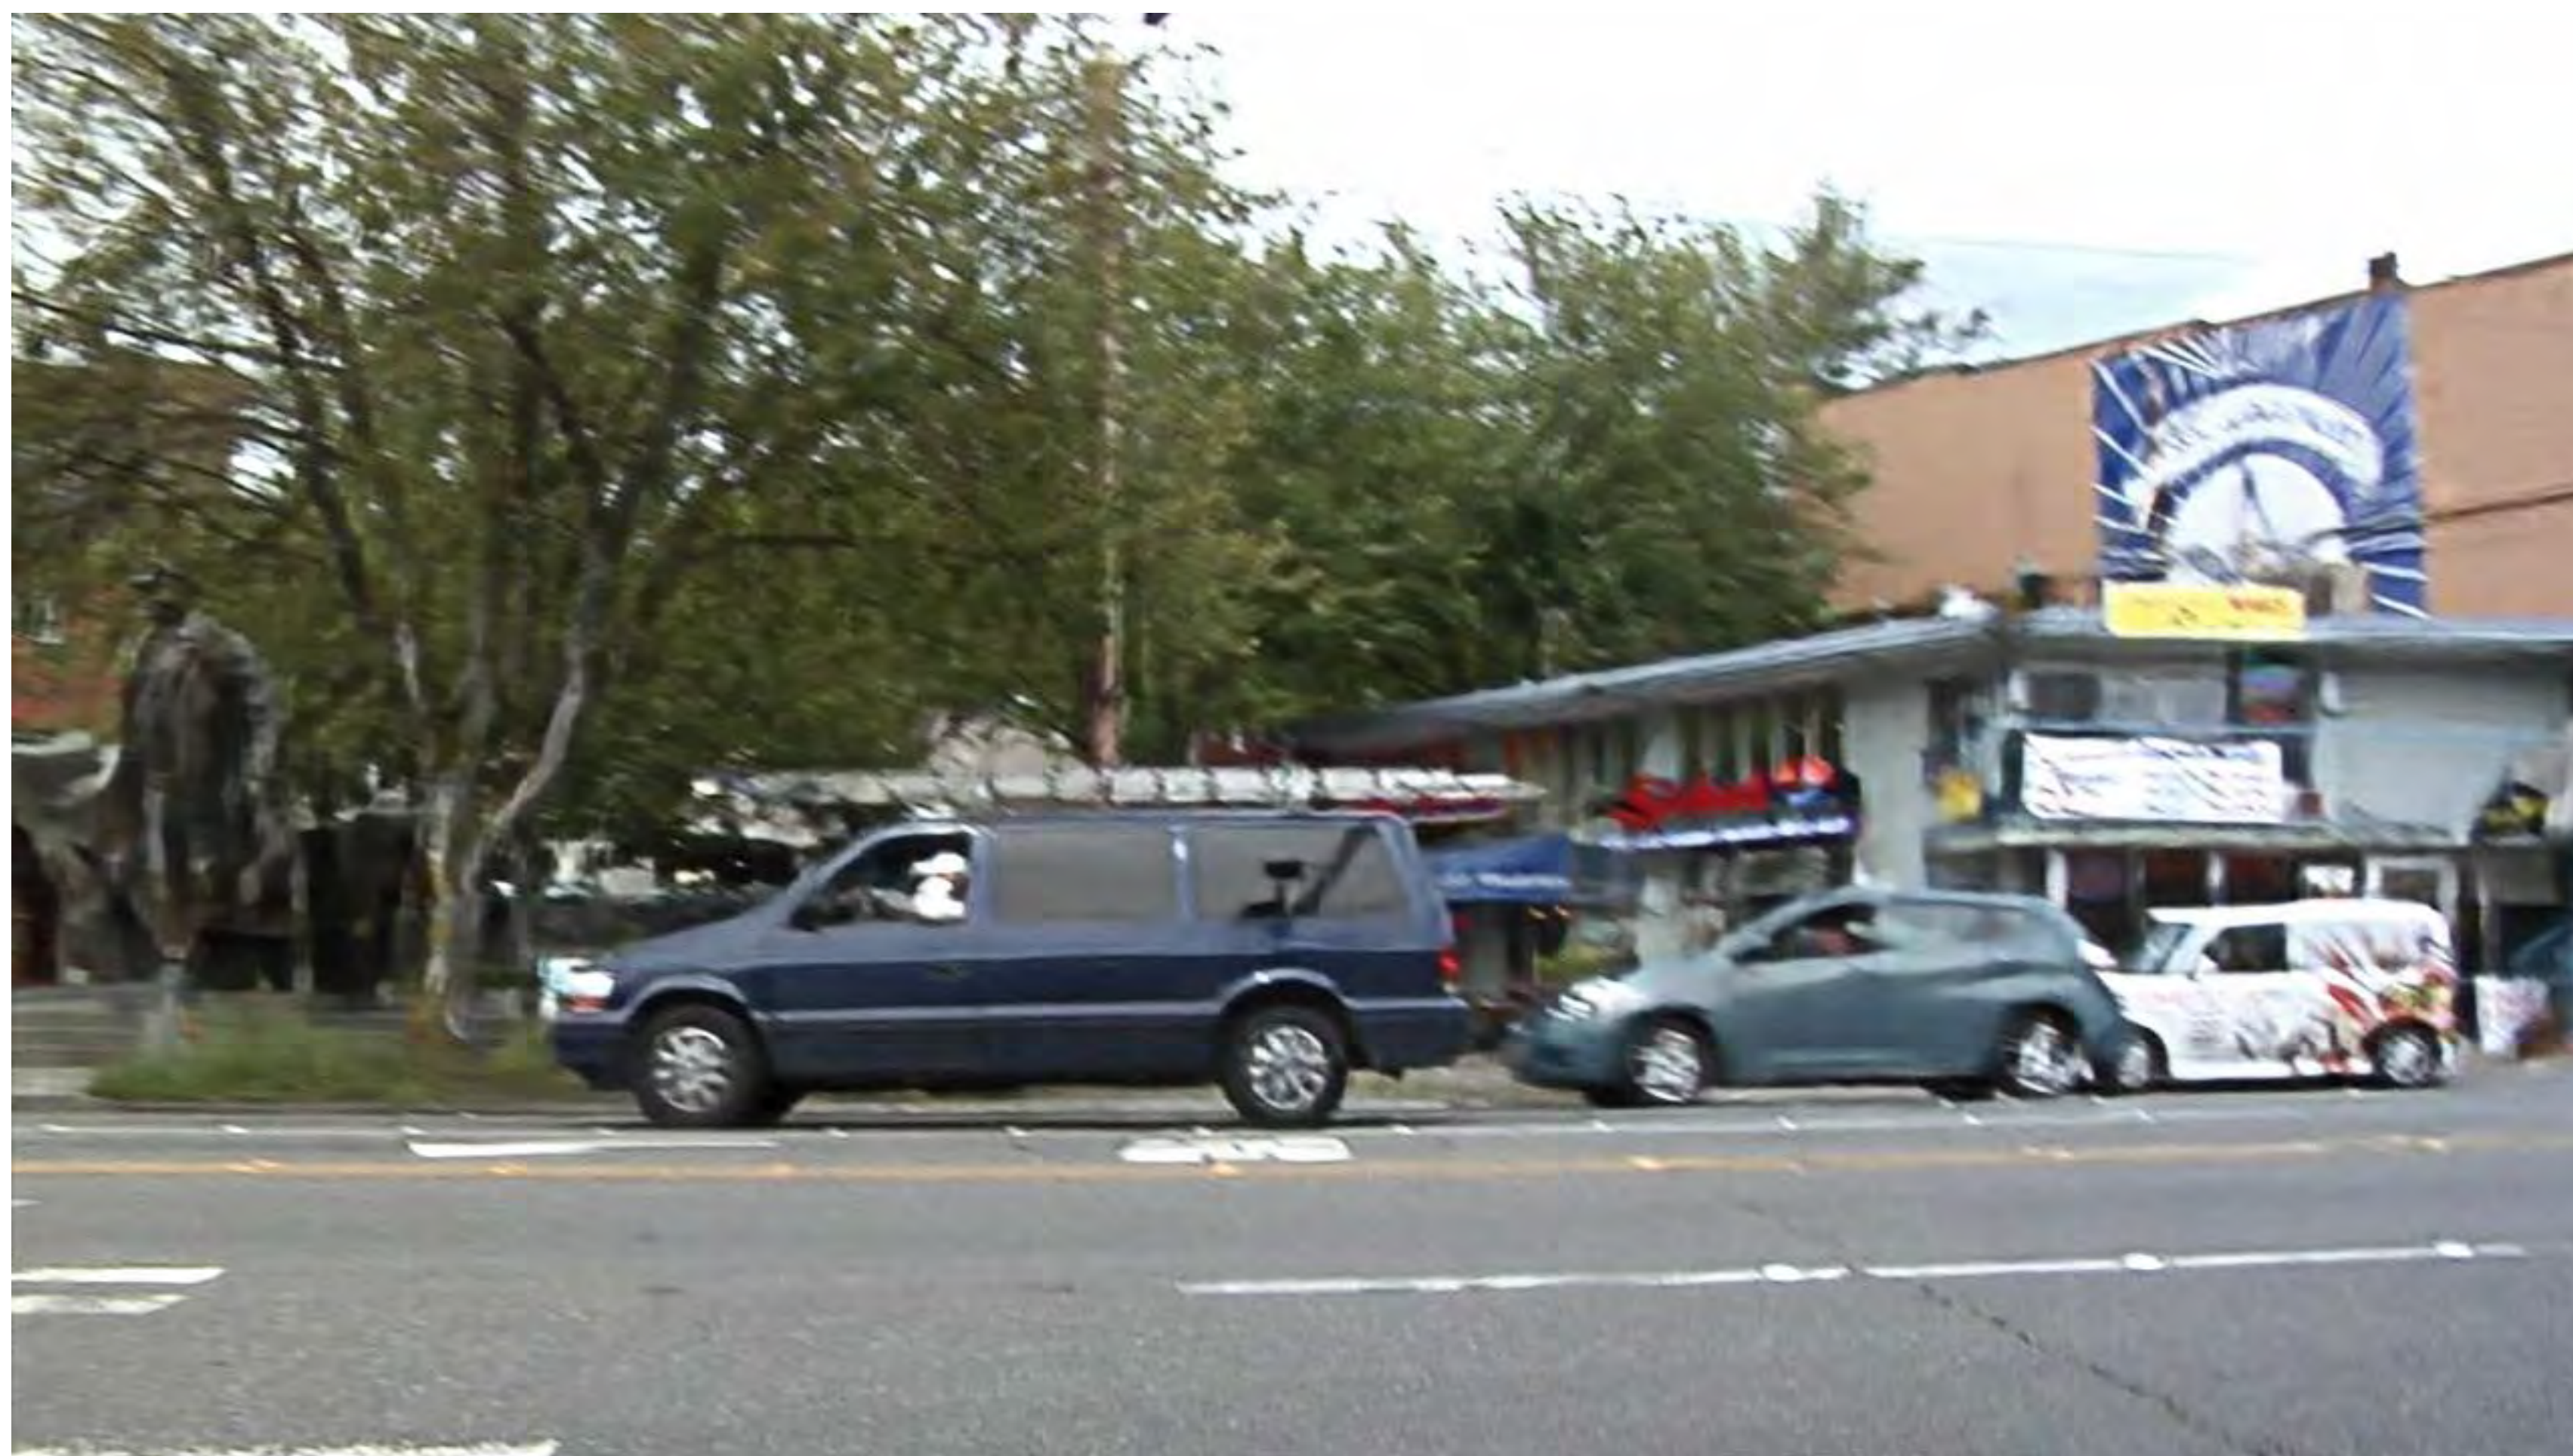

DBN+Noalign



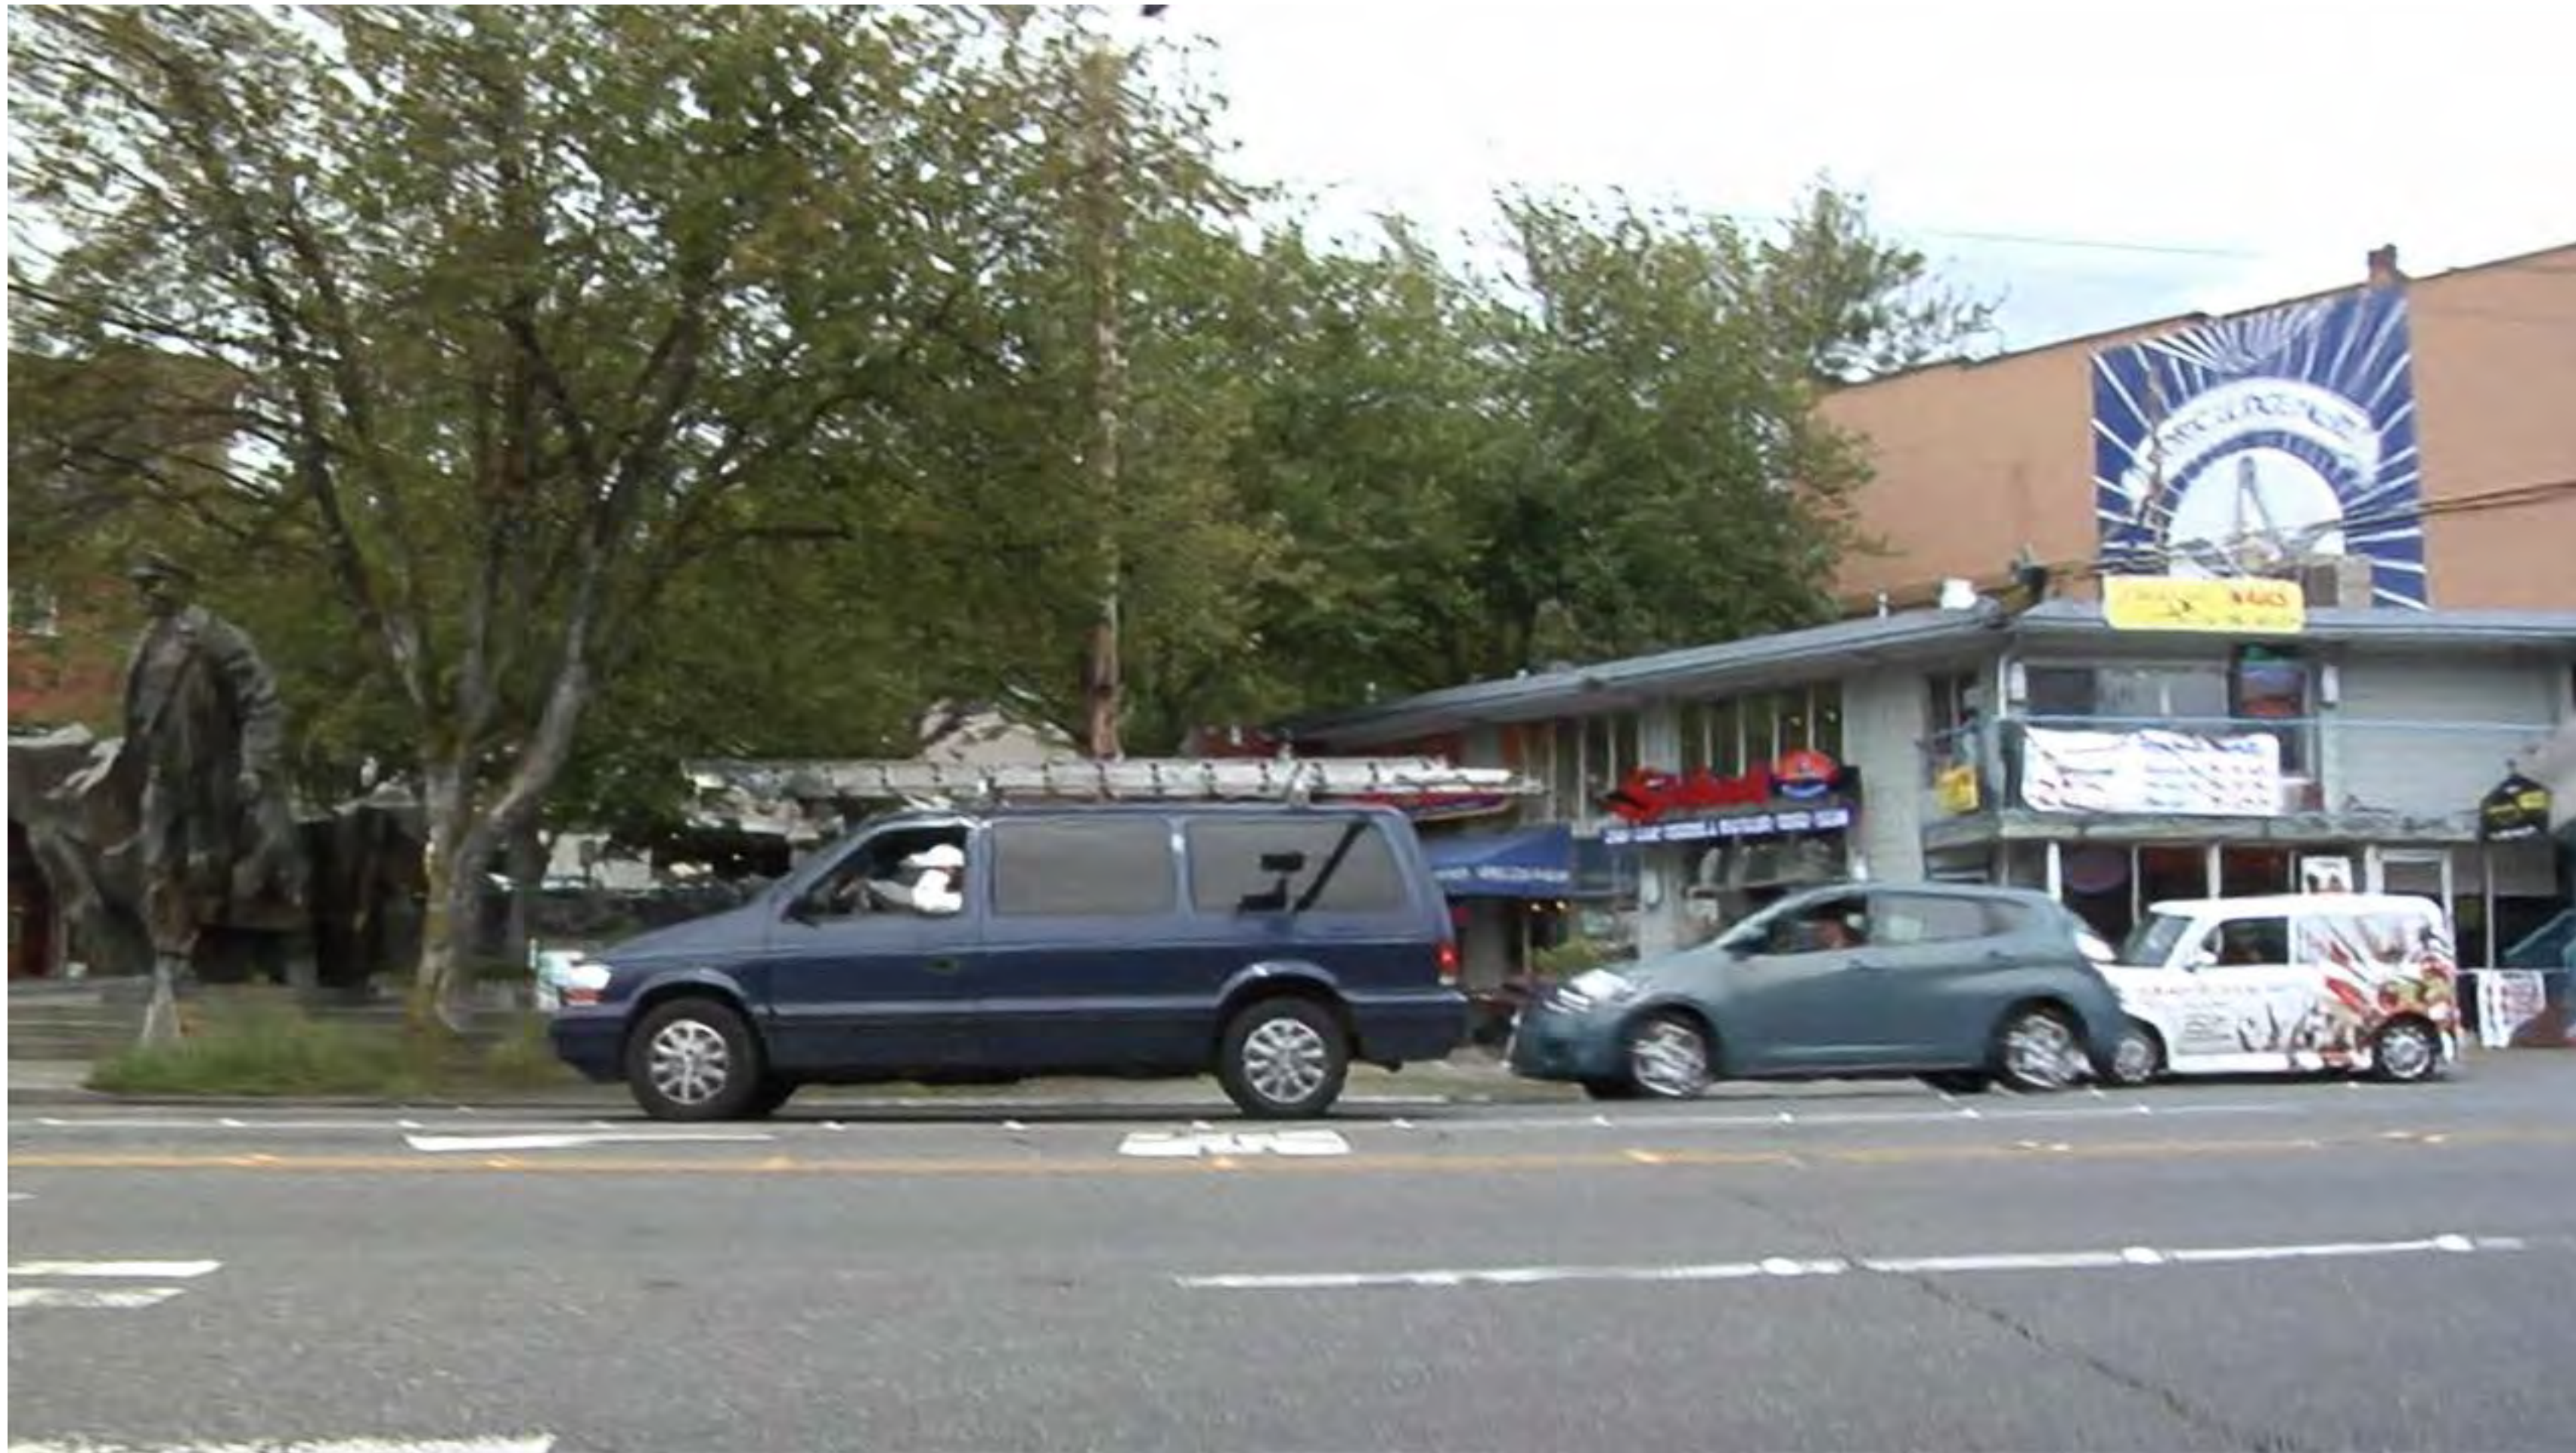

DBN+Homog



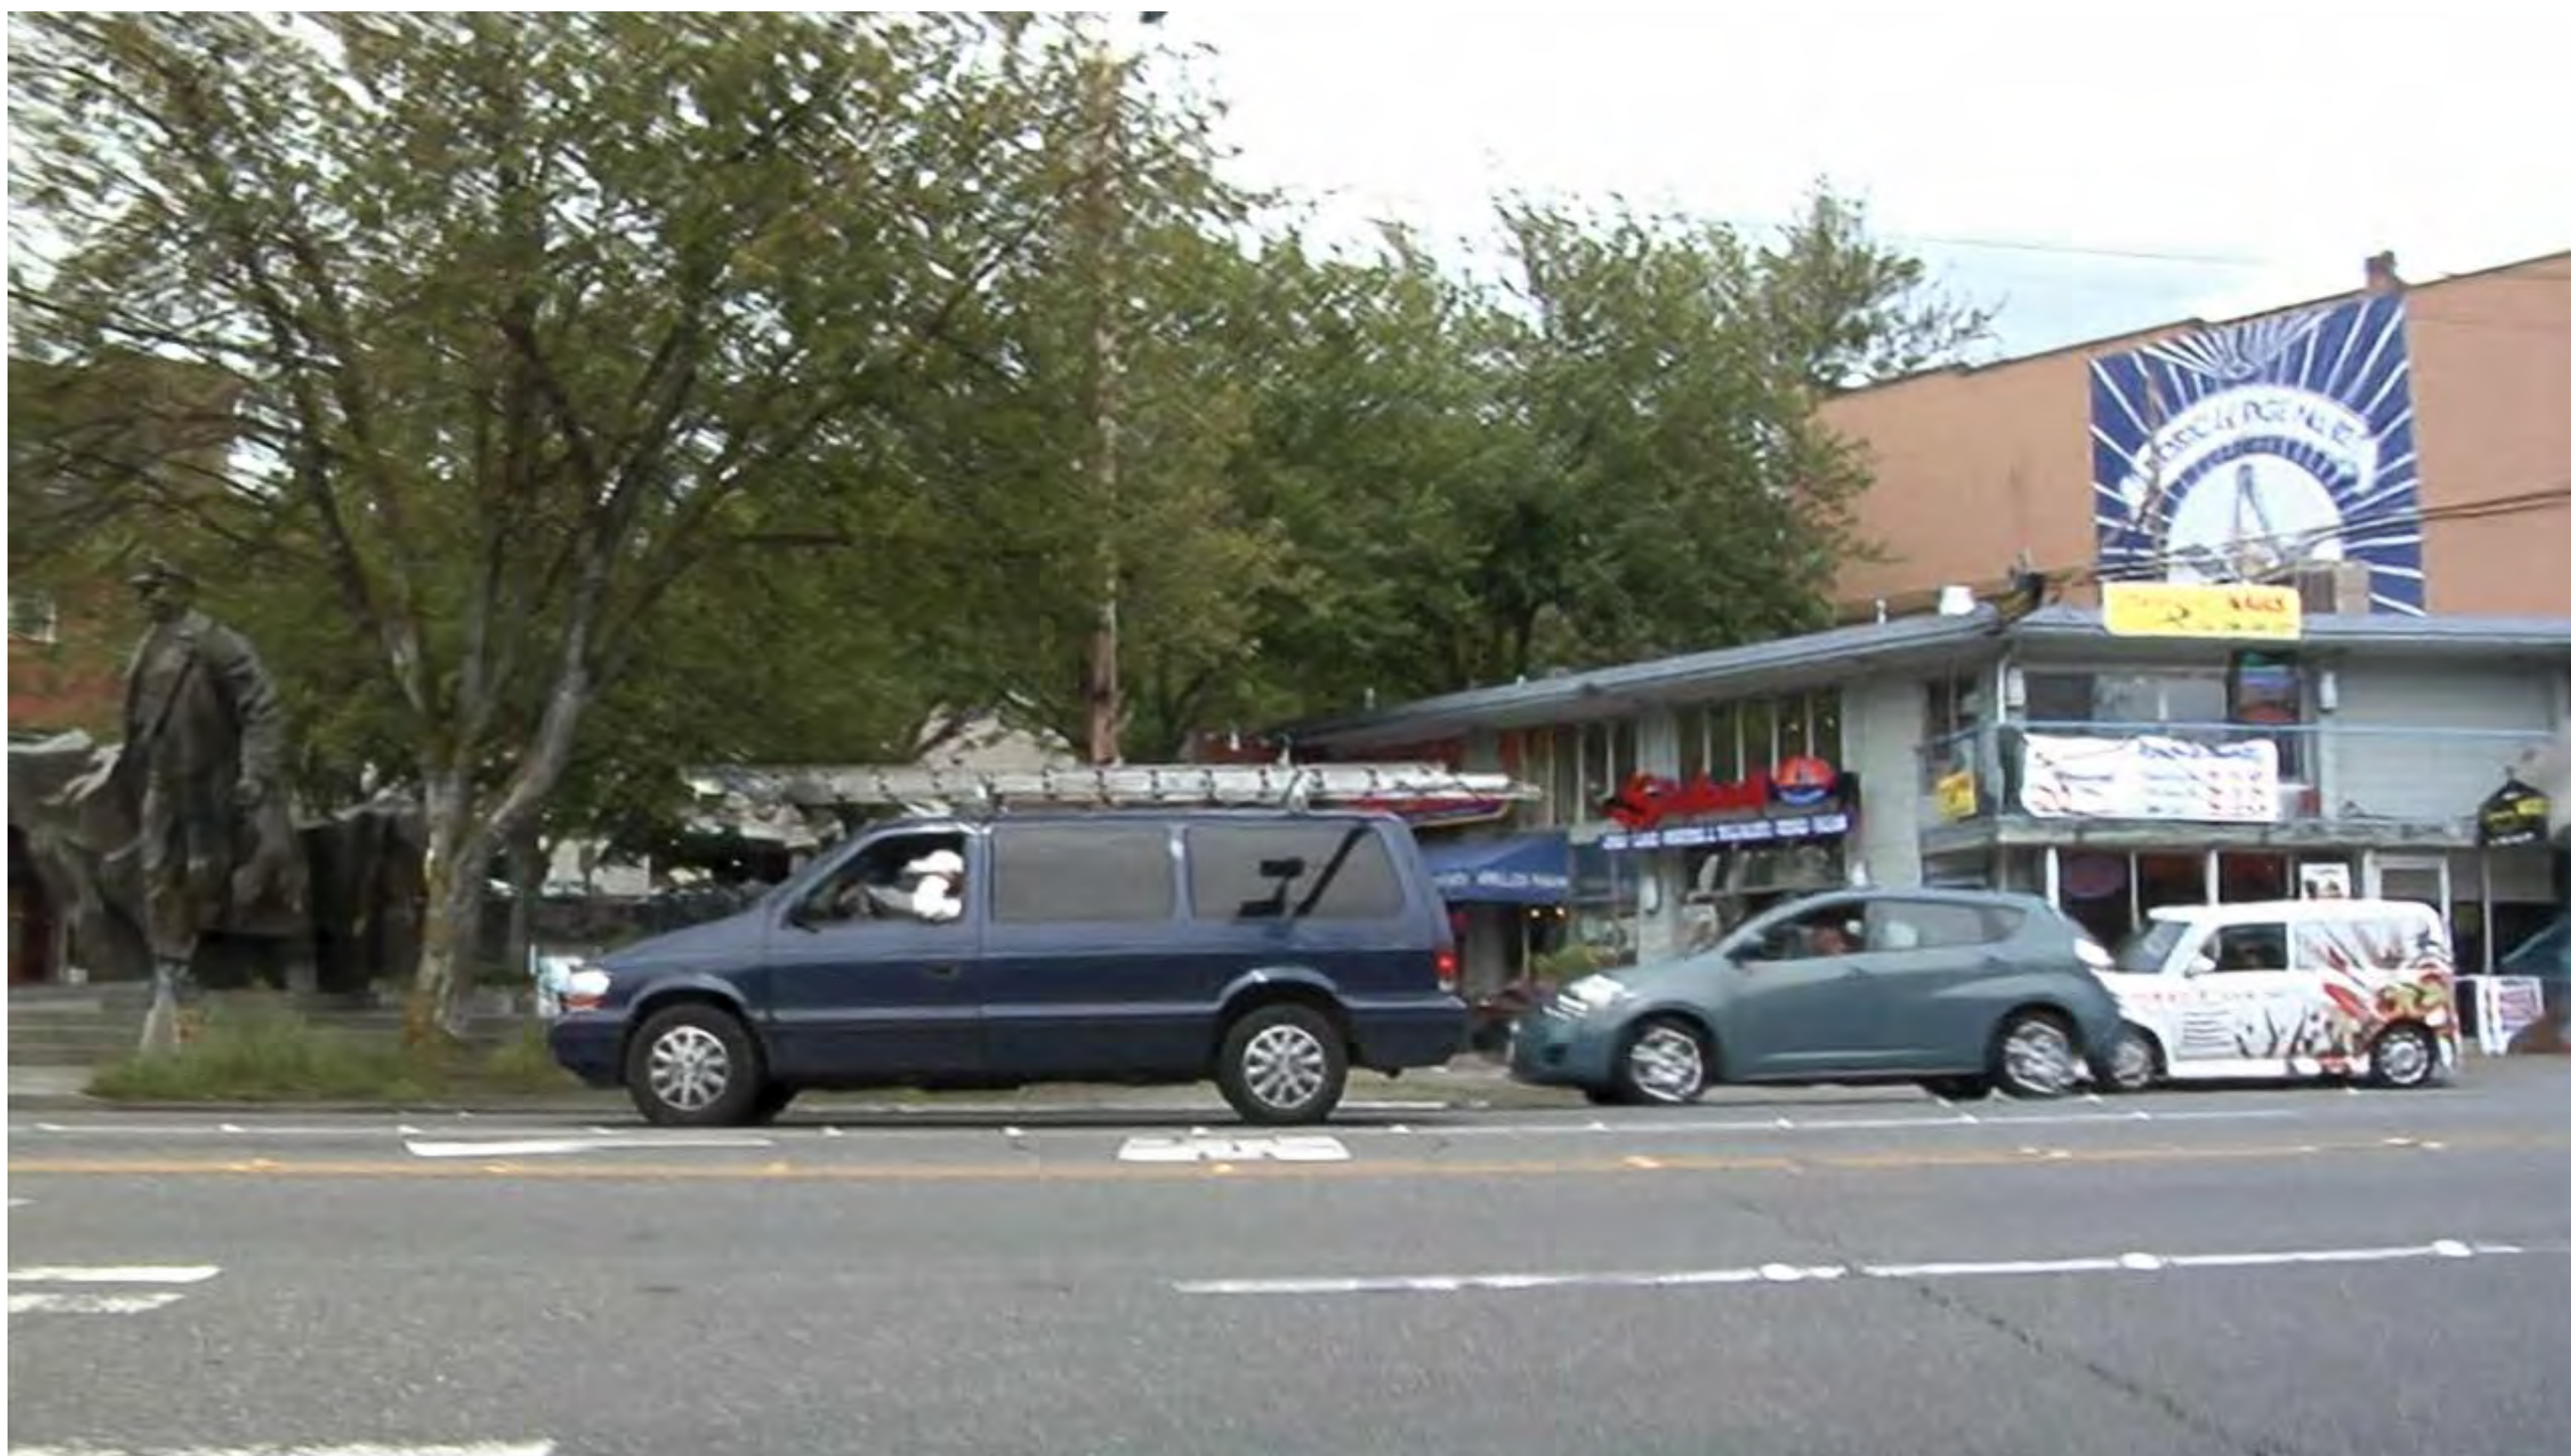

DBN+Flow



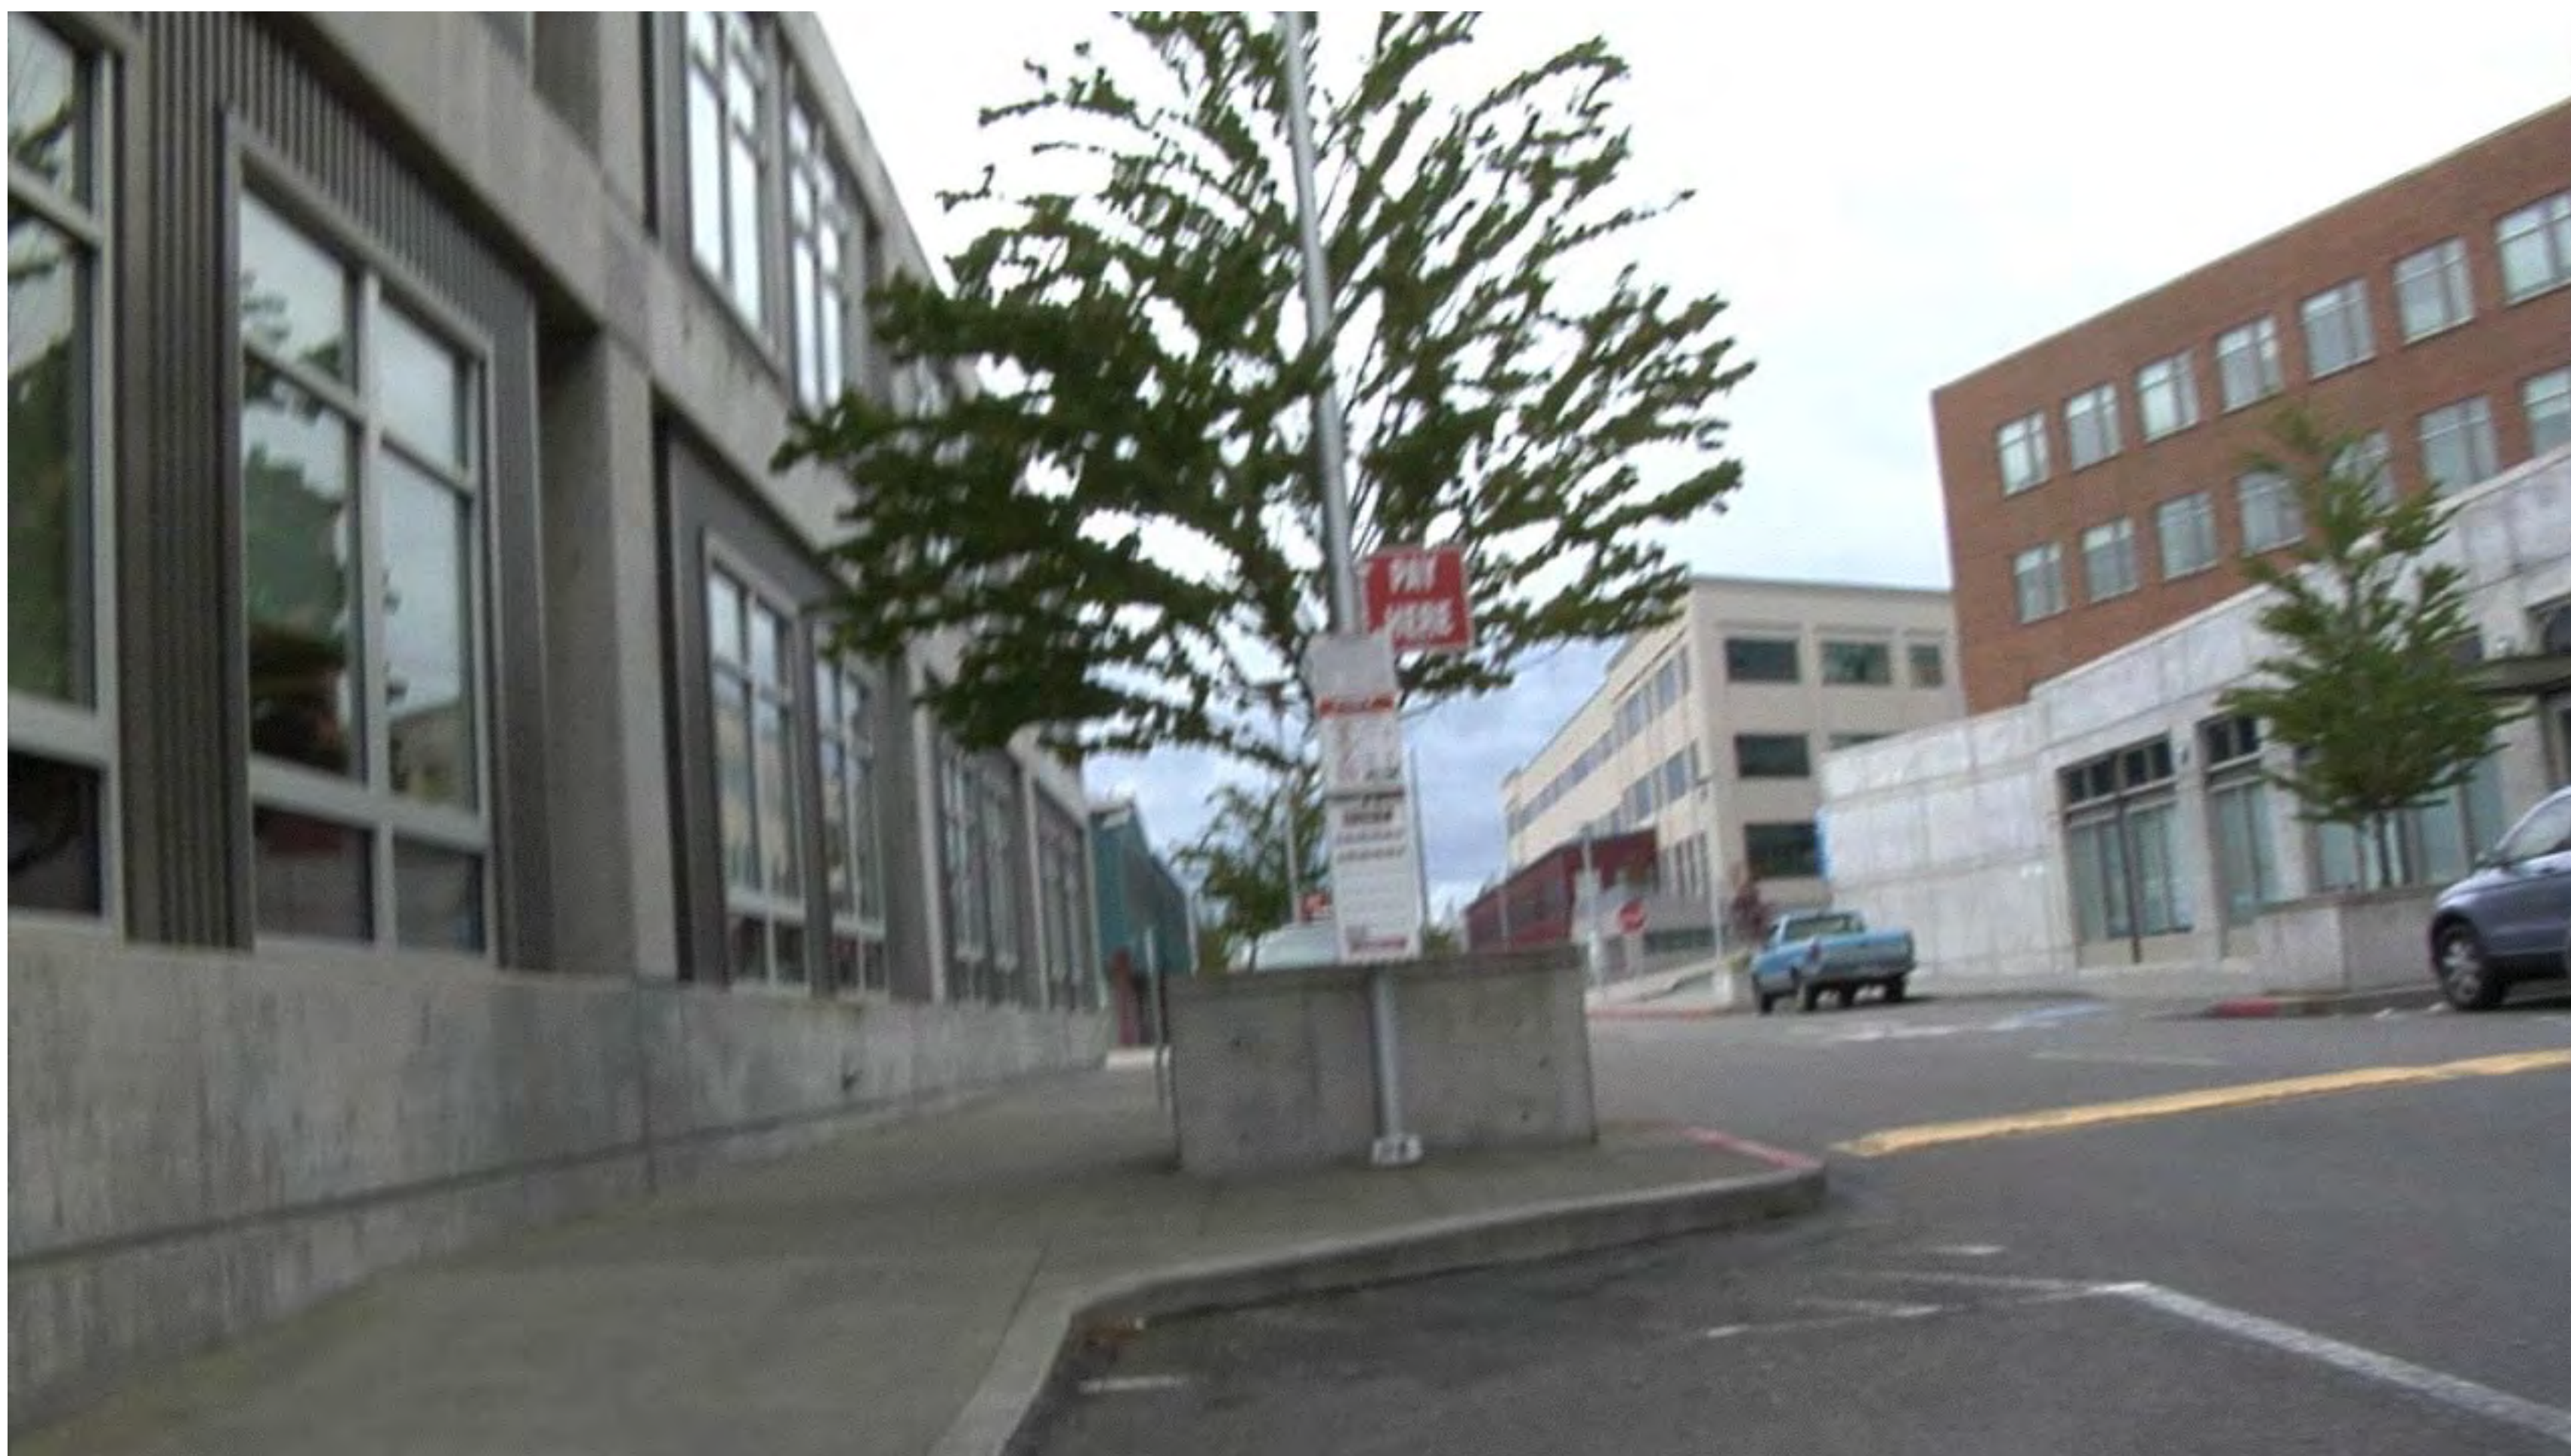

input



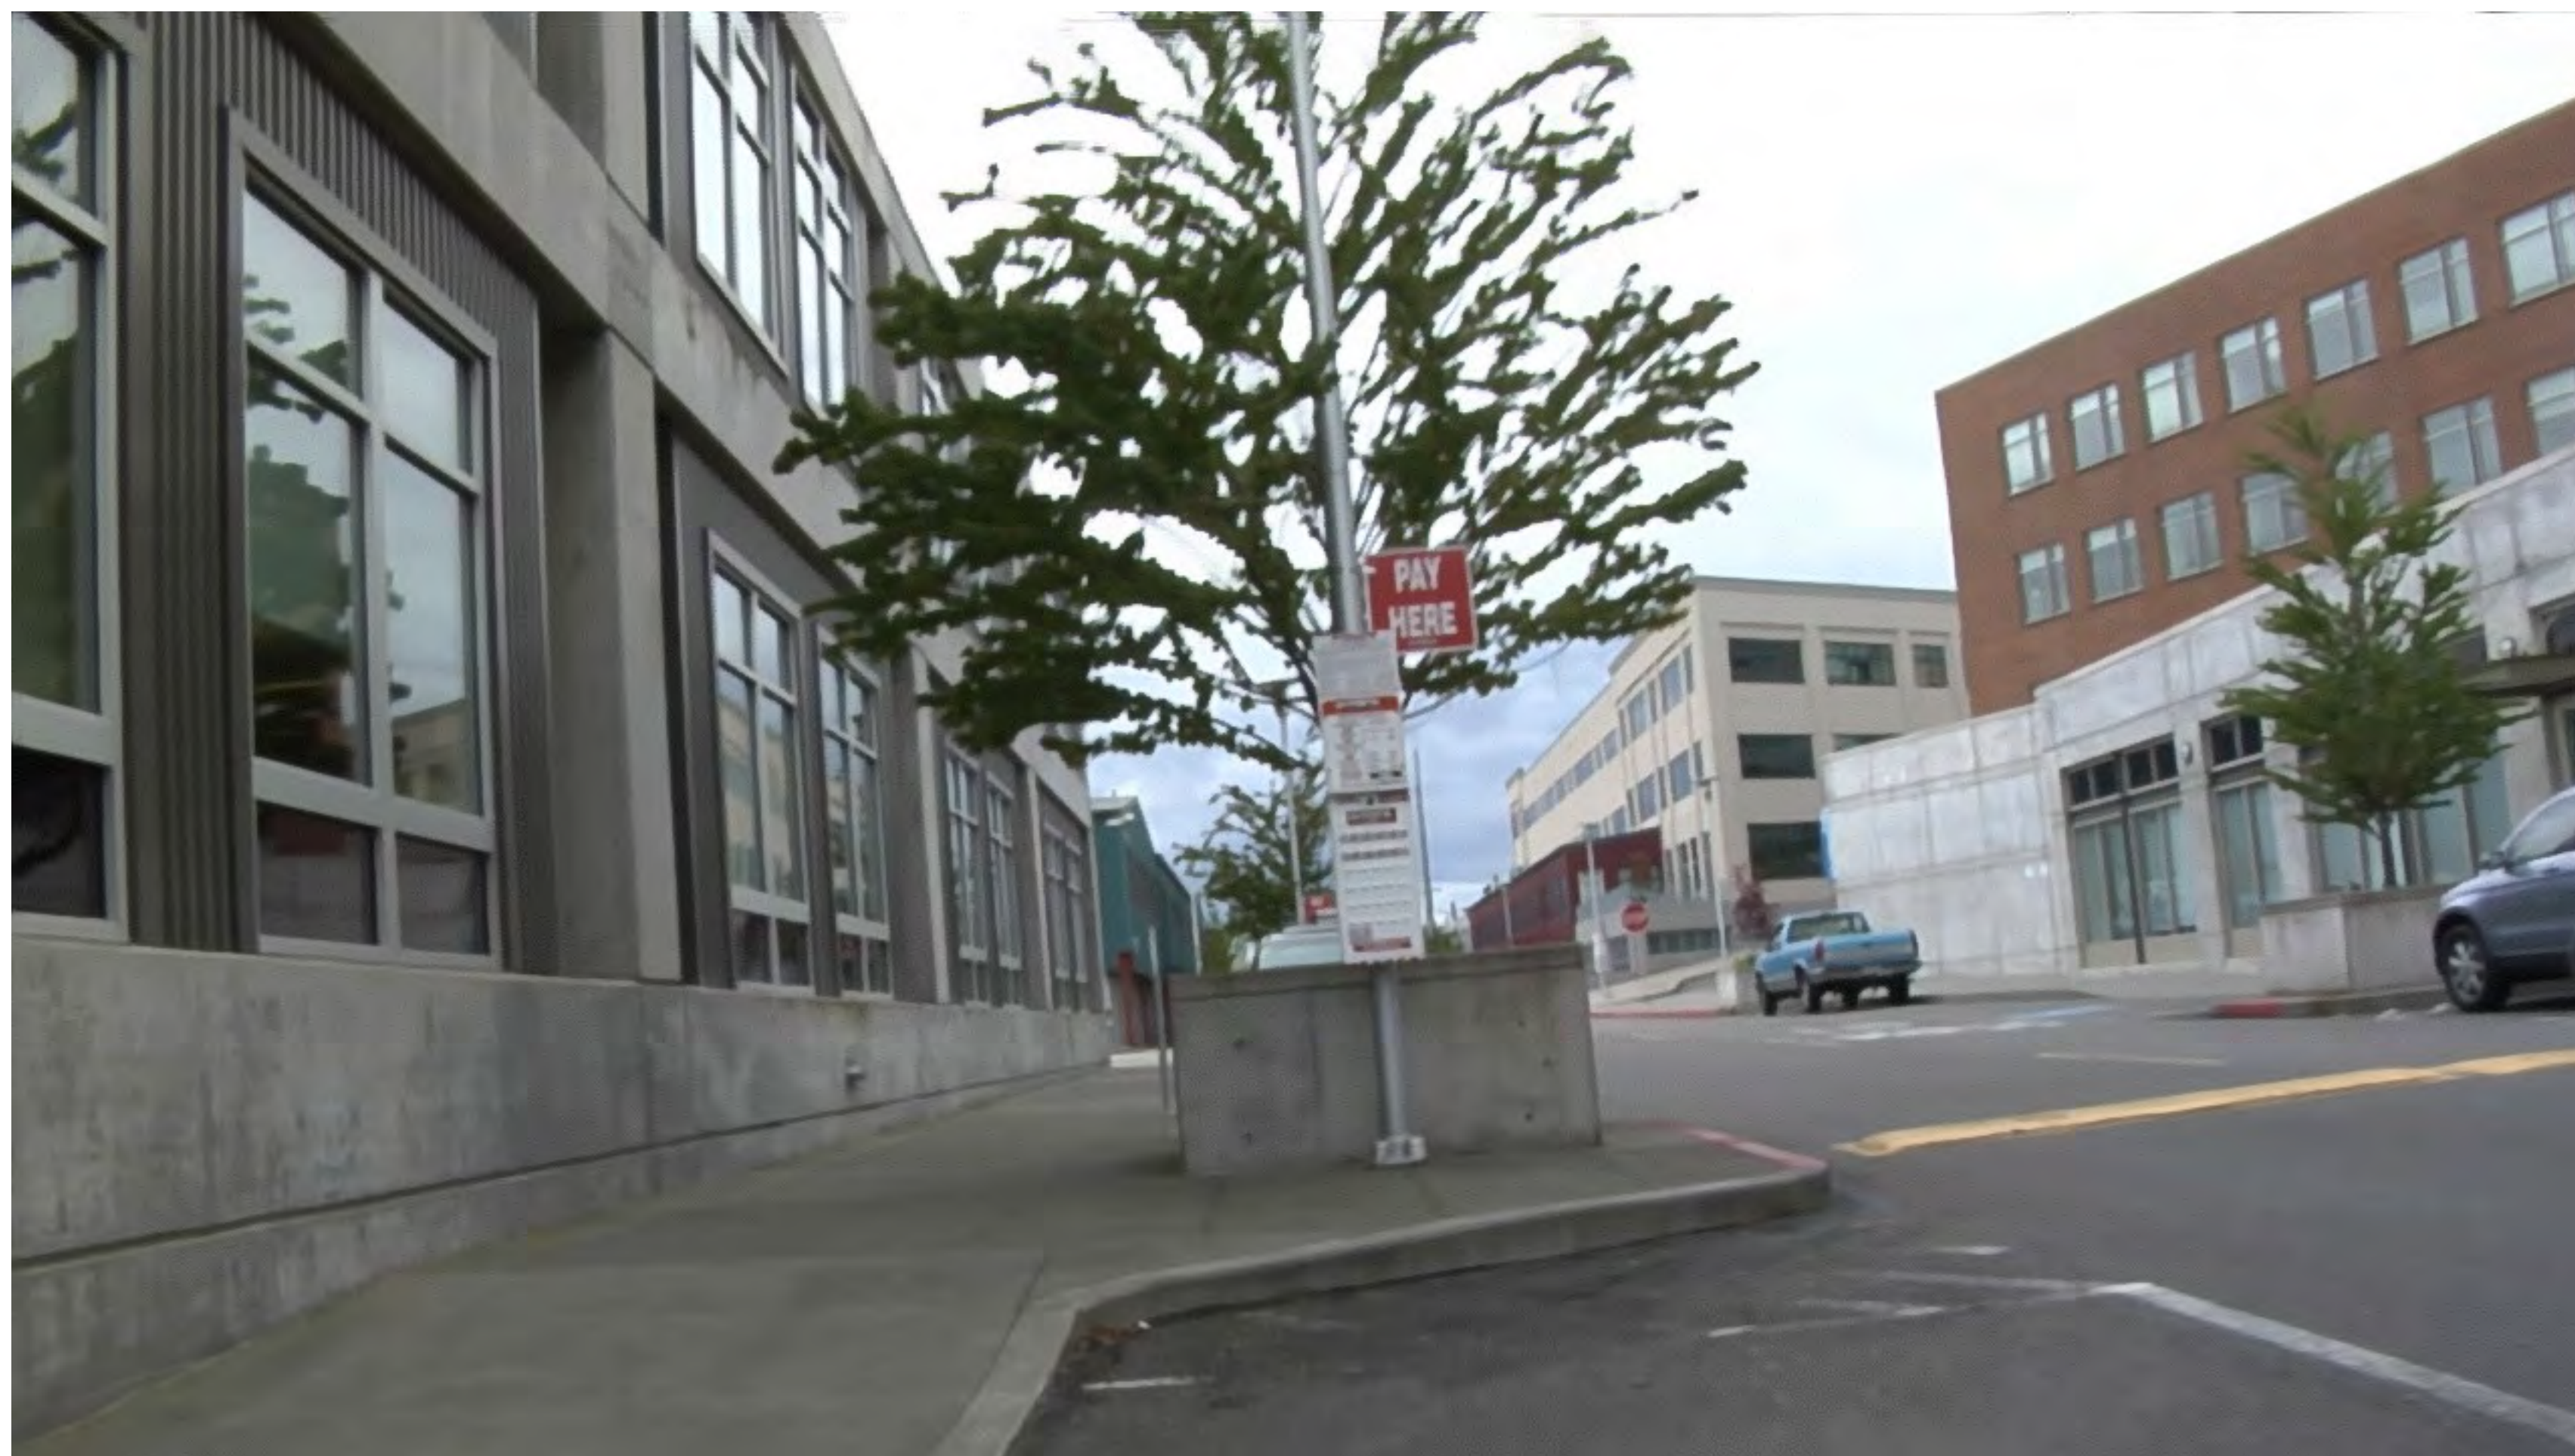

Cho [3]



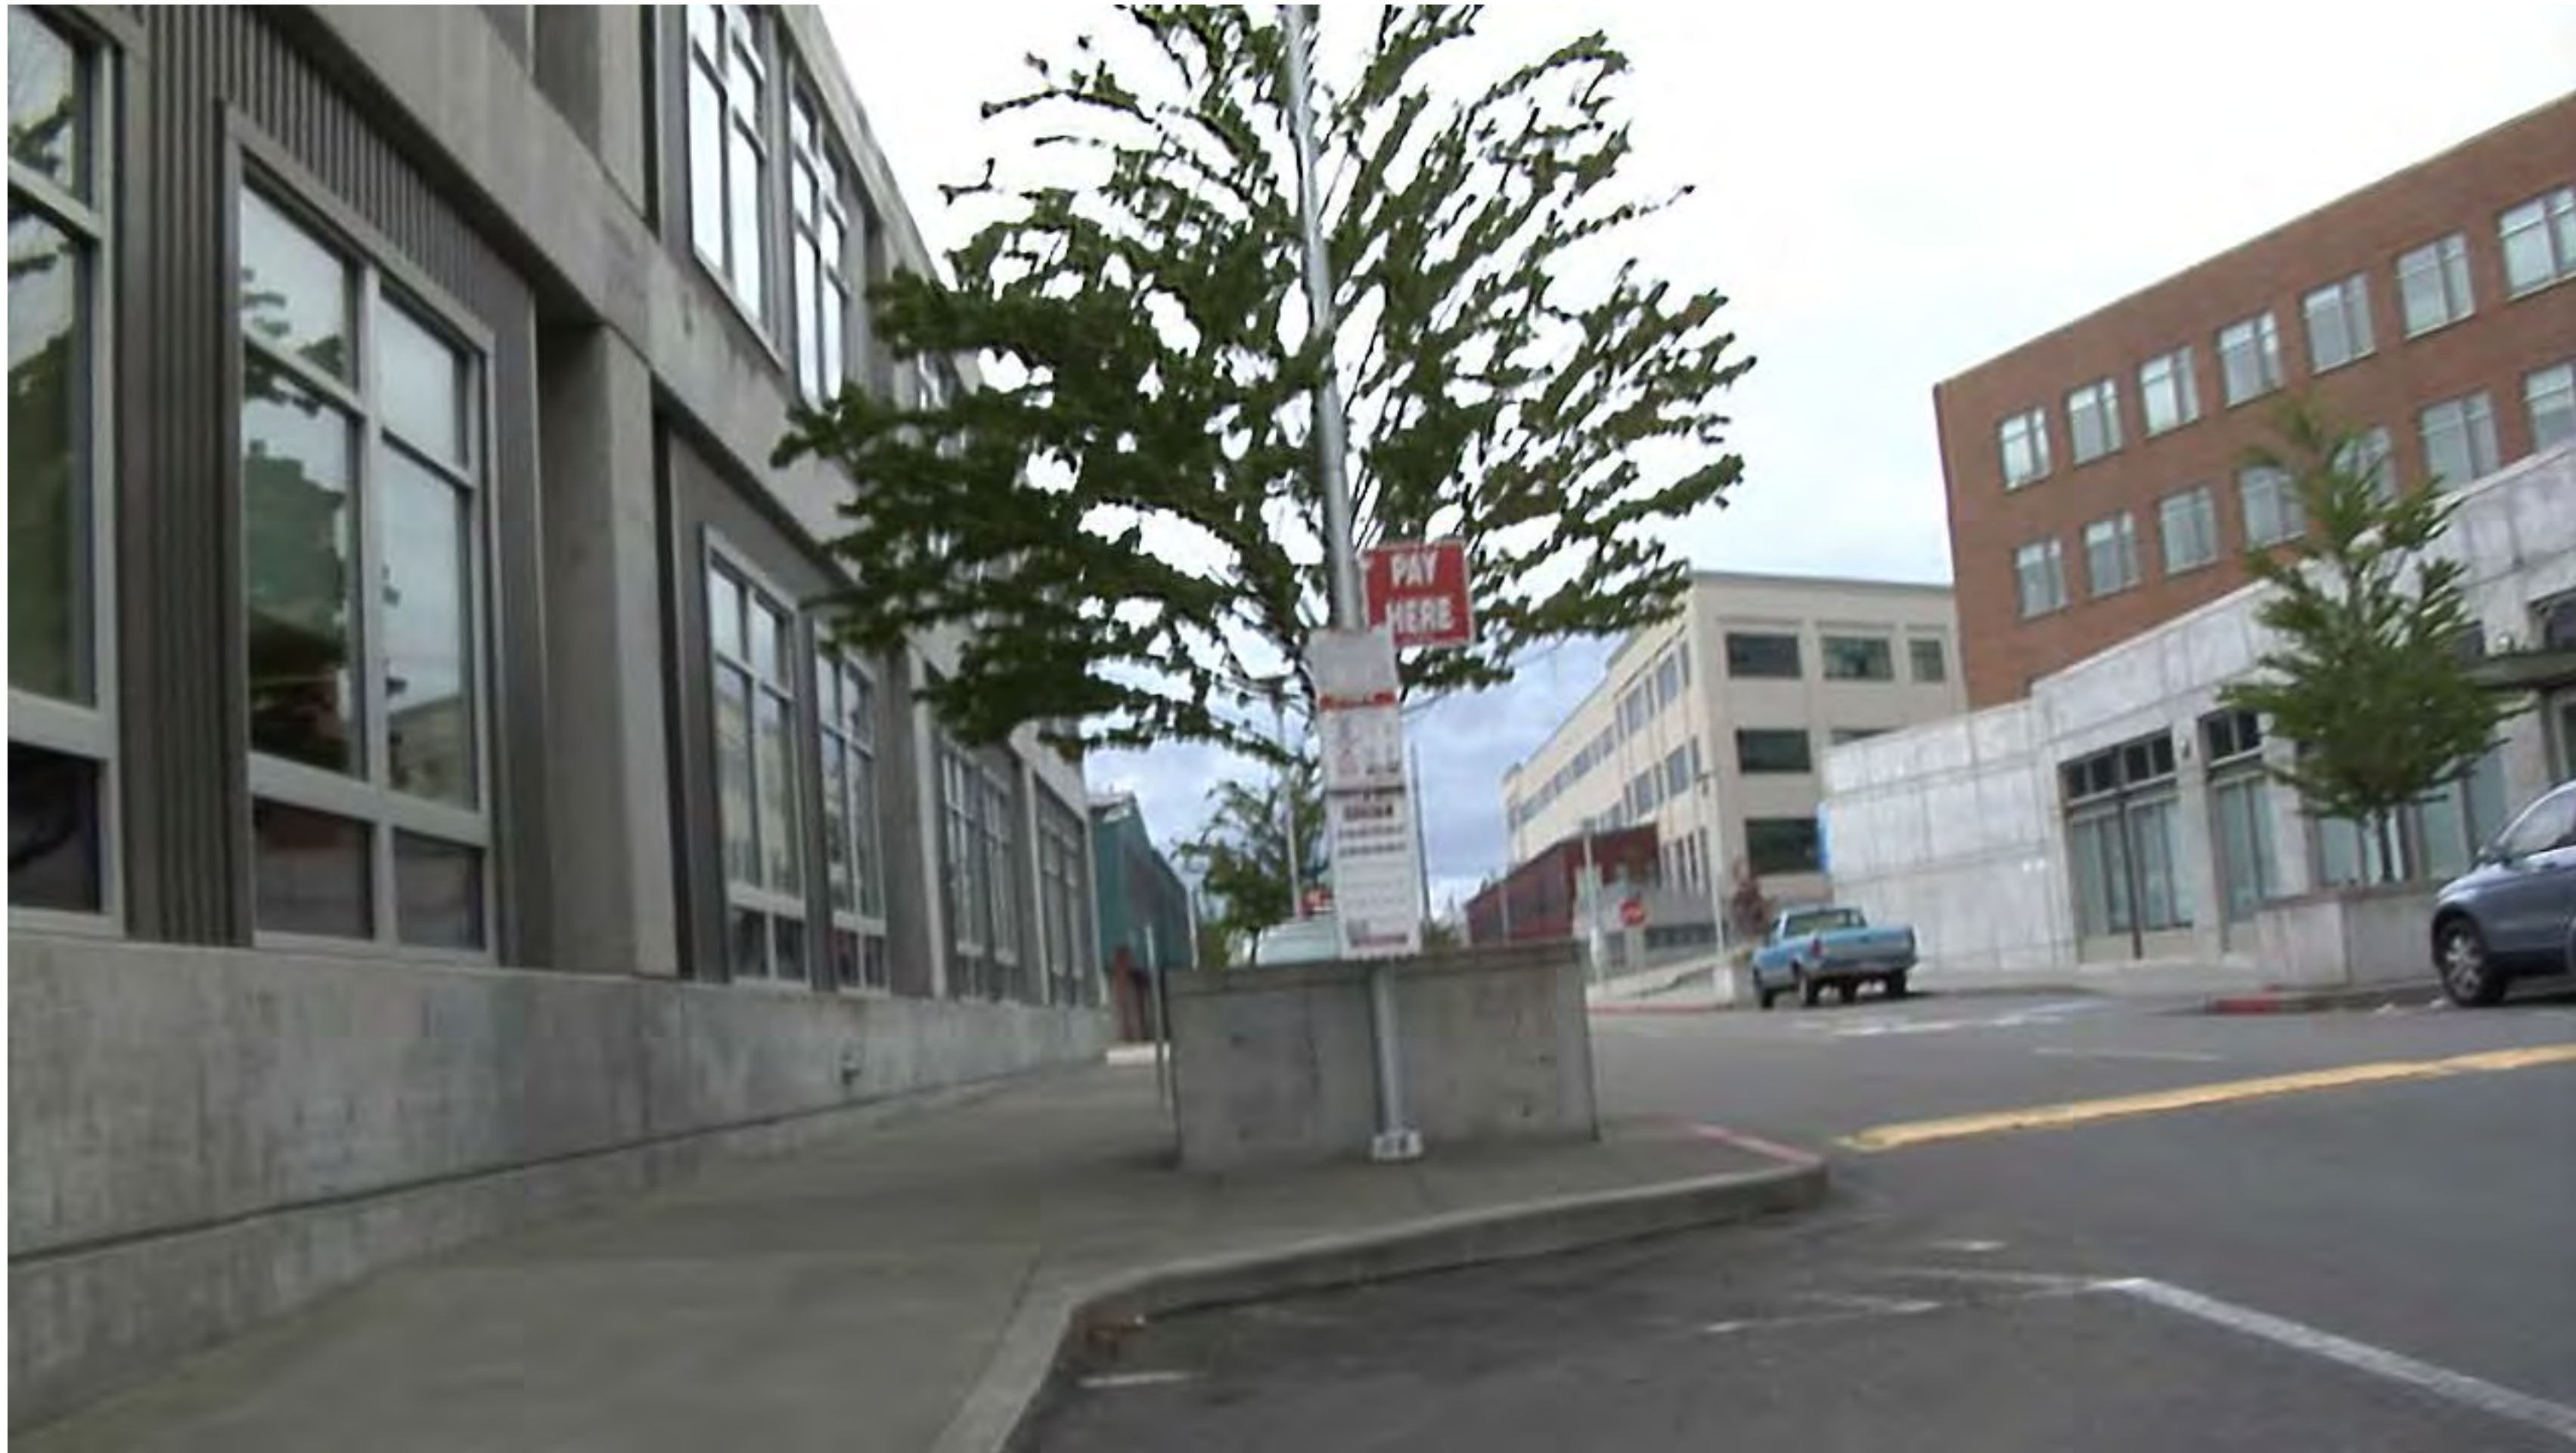

Kim and Lee [15]



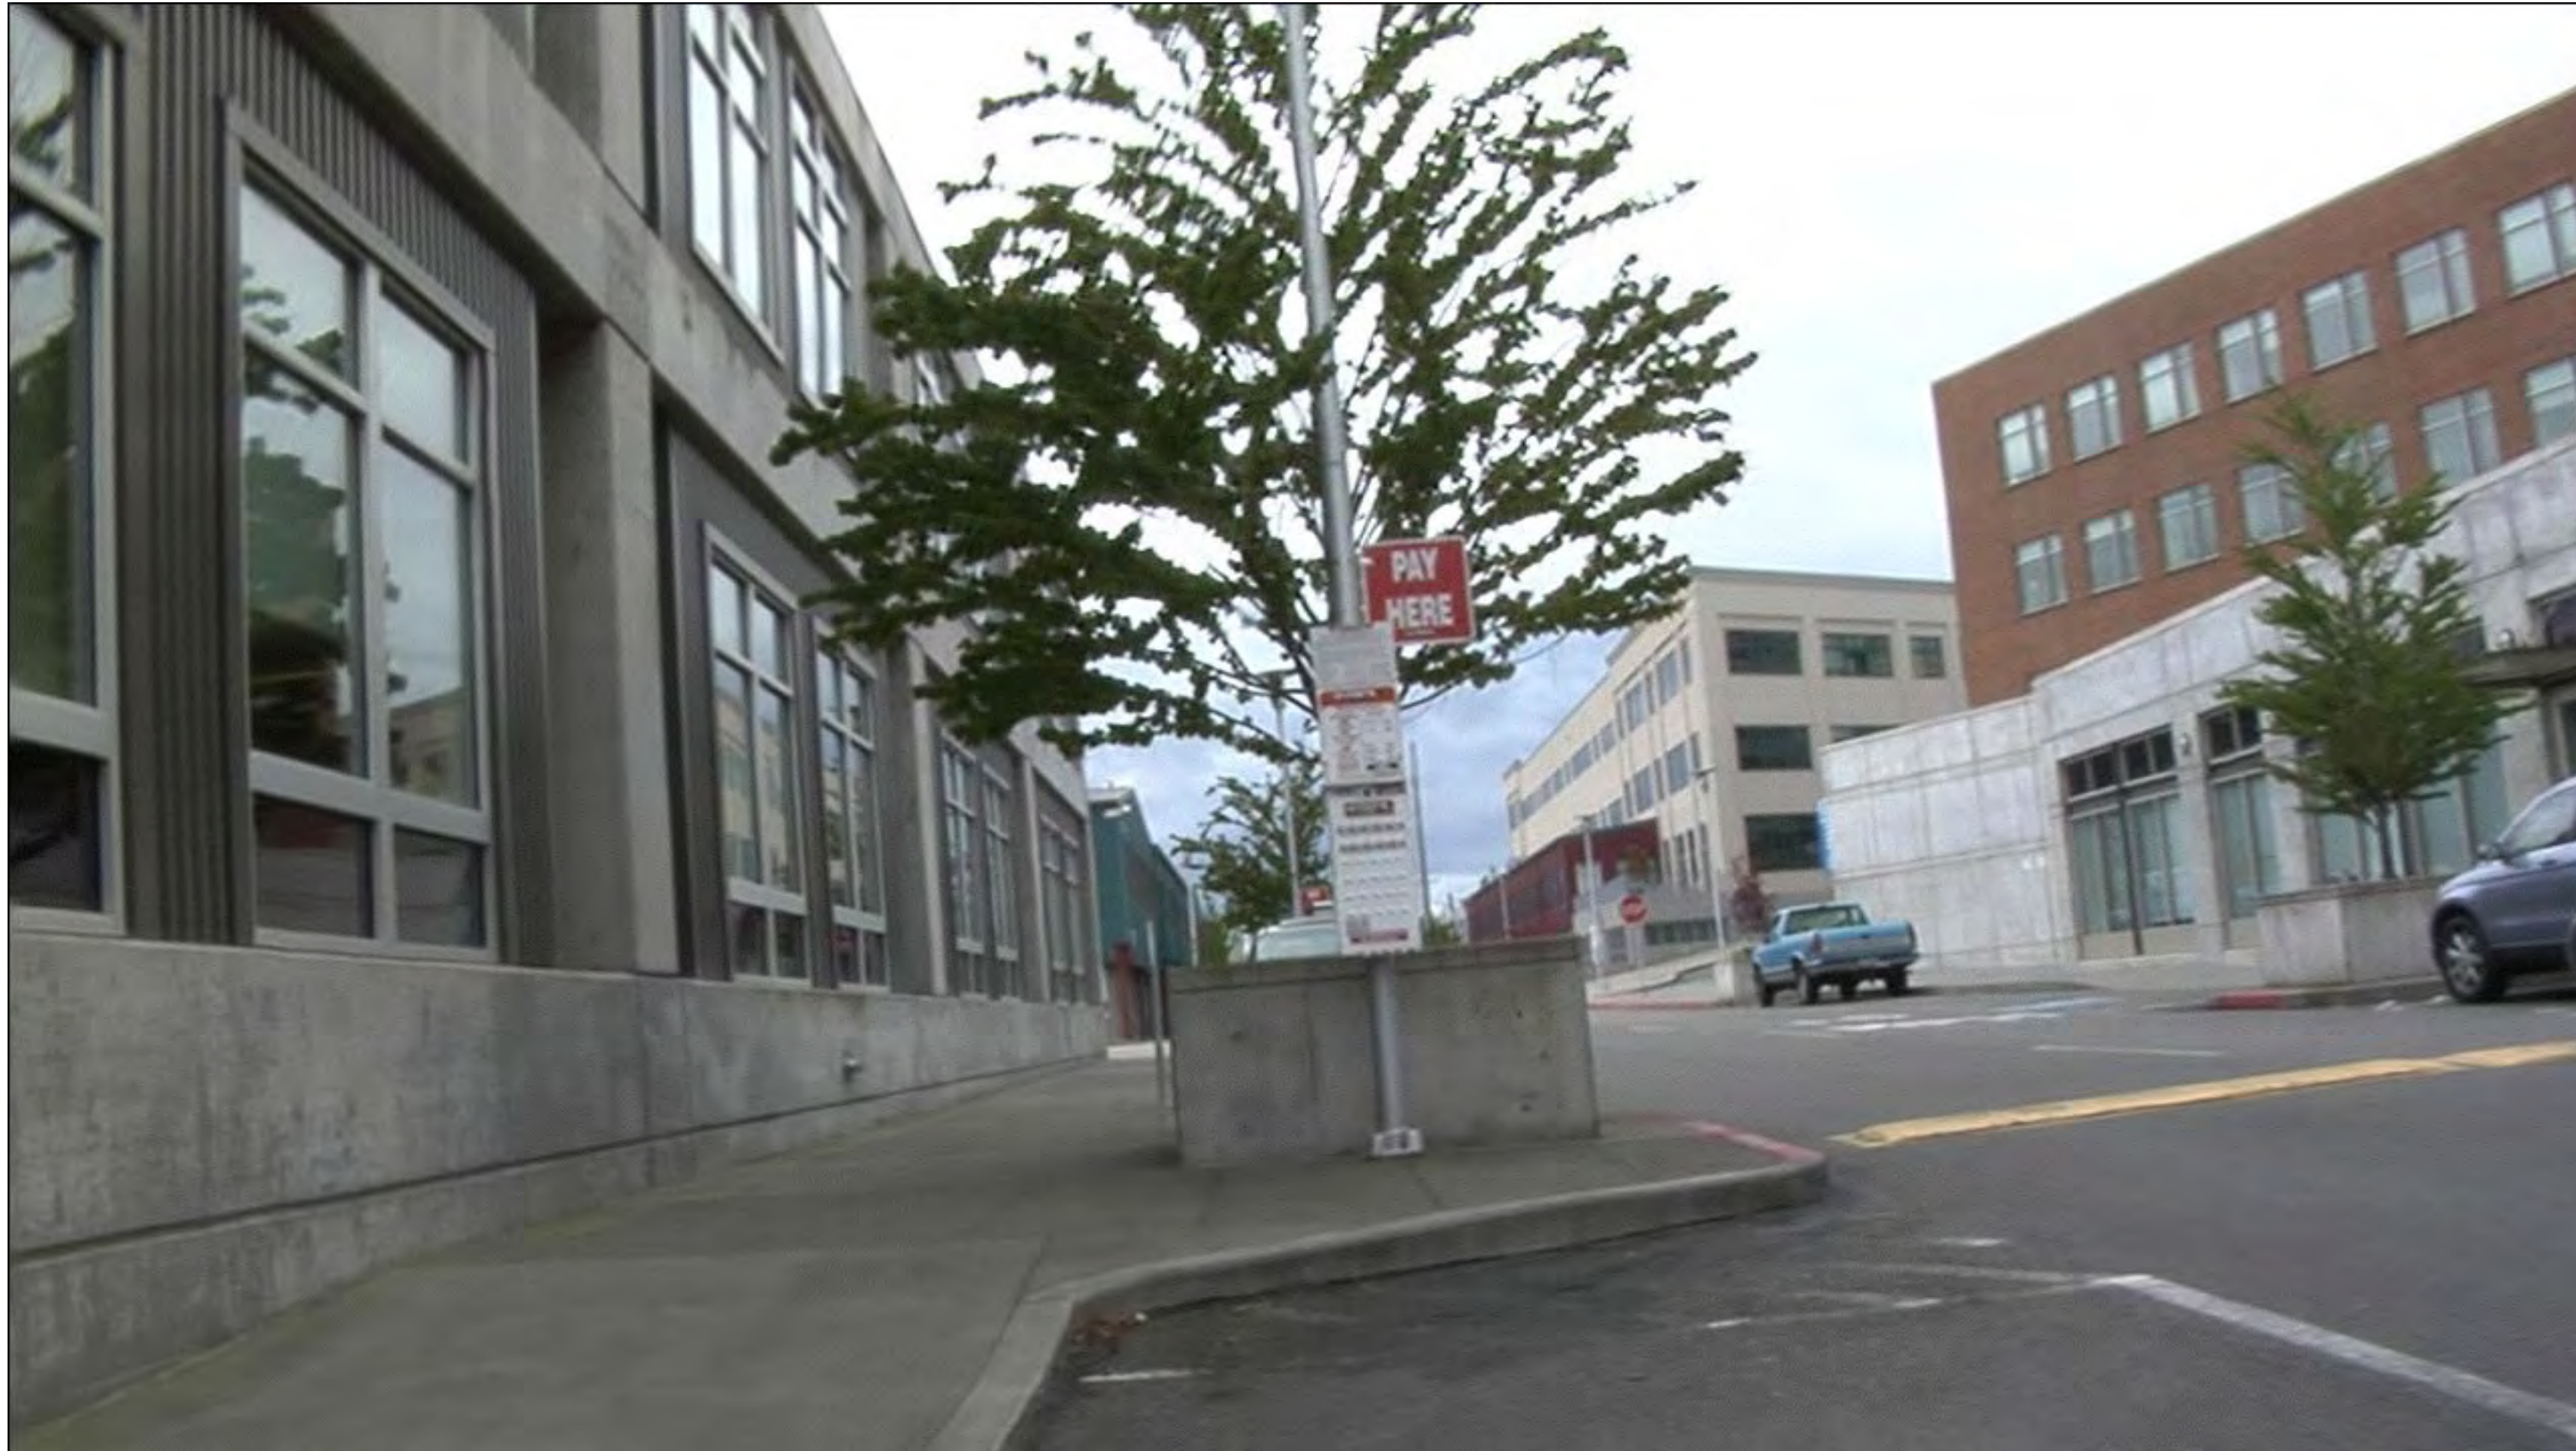

WFA [5]



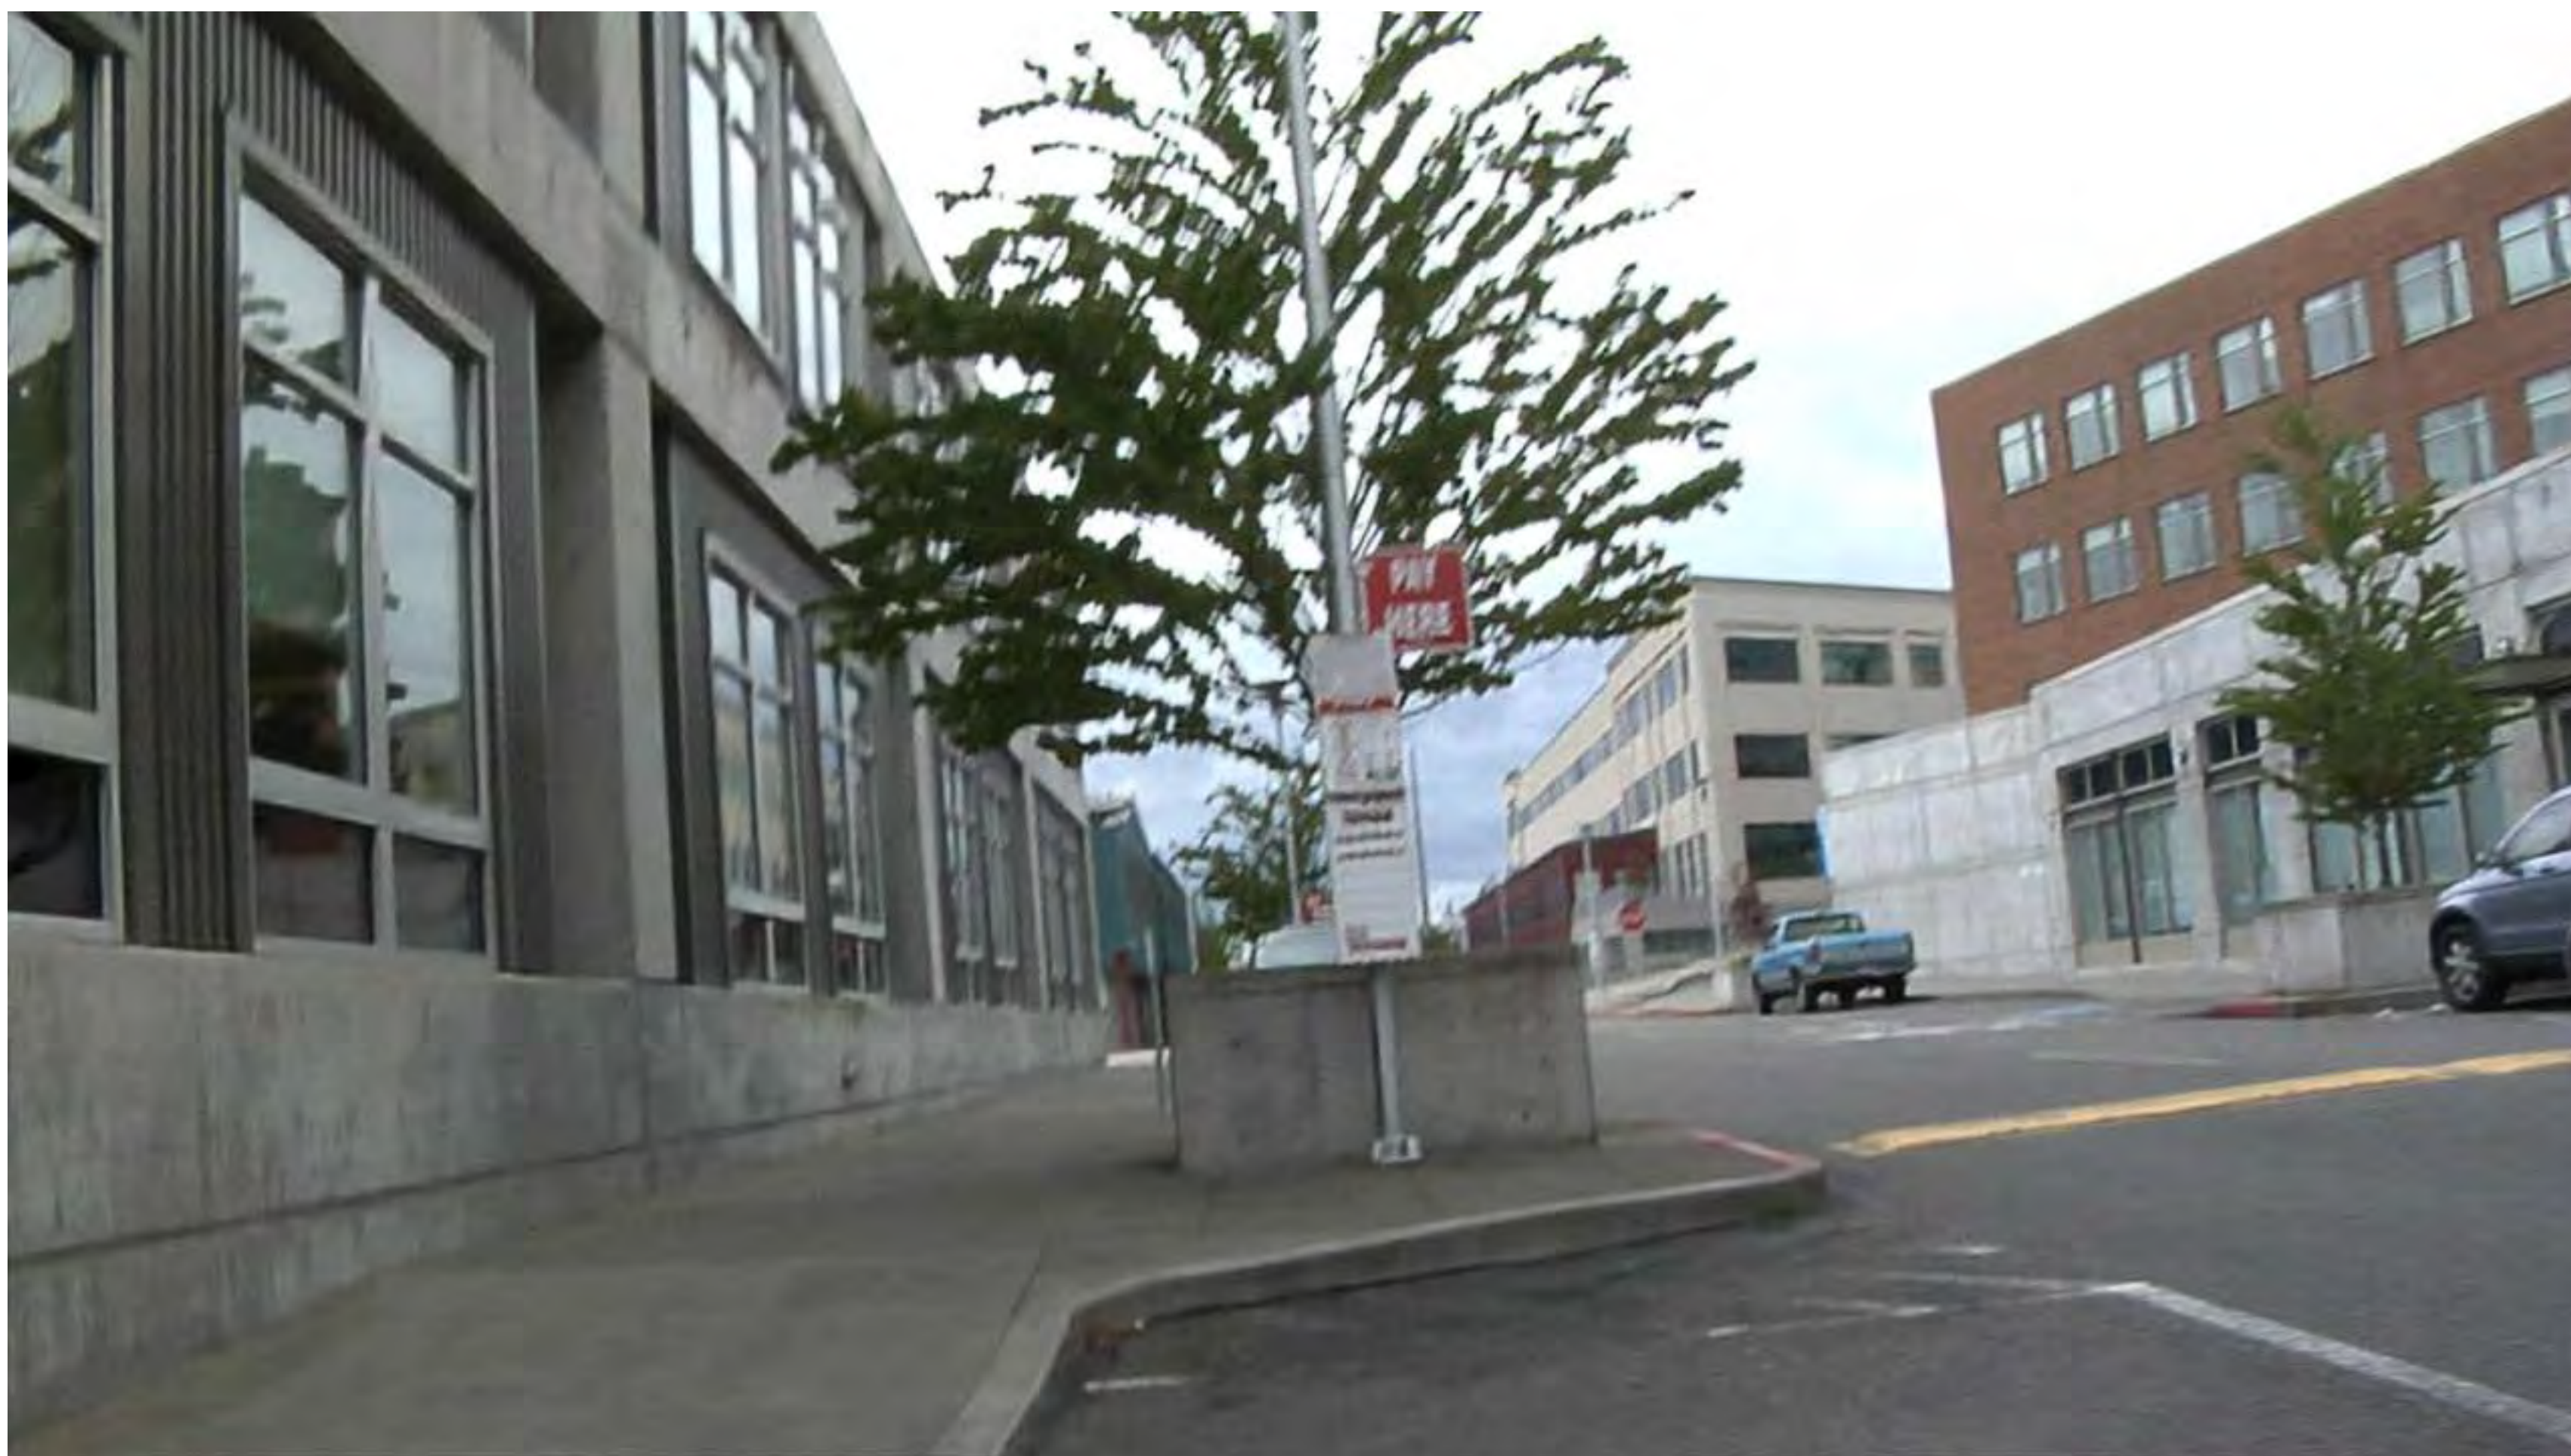

DBN+Single



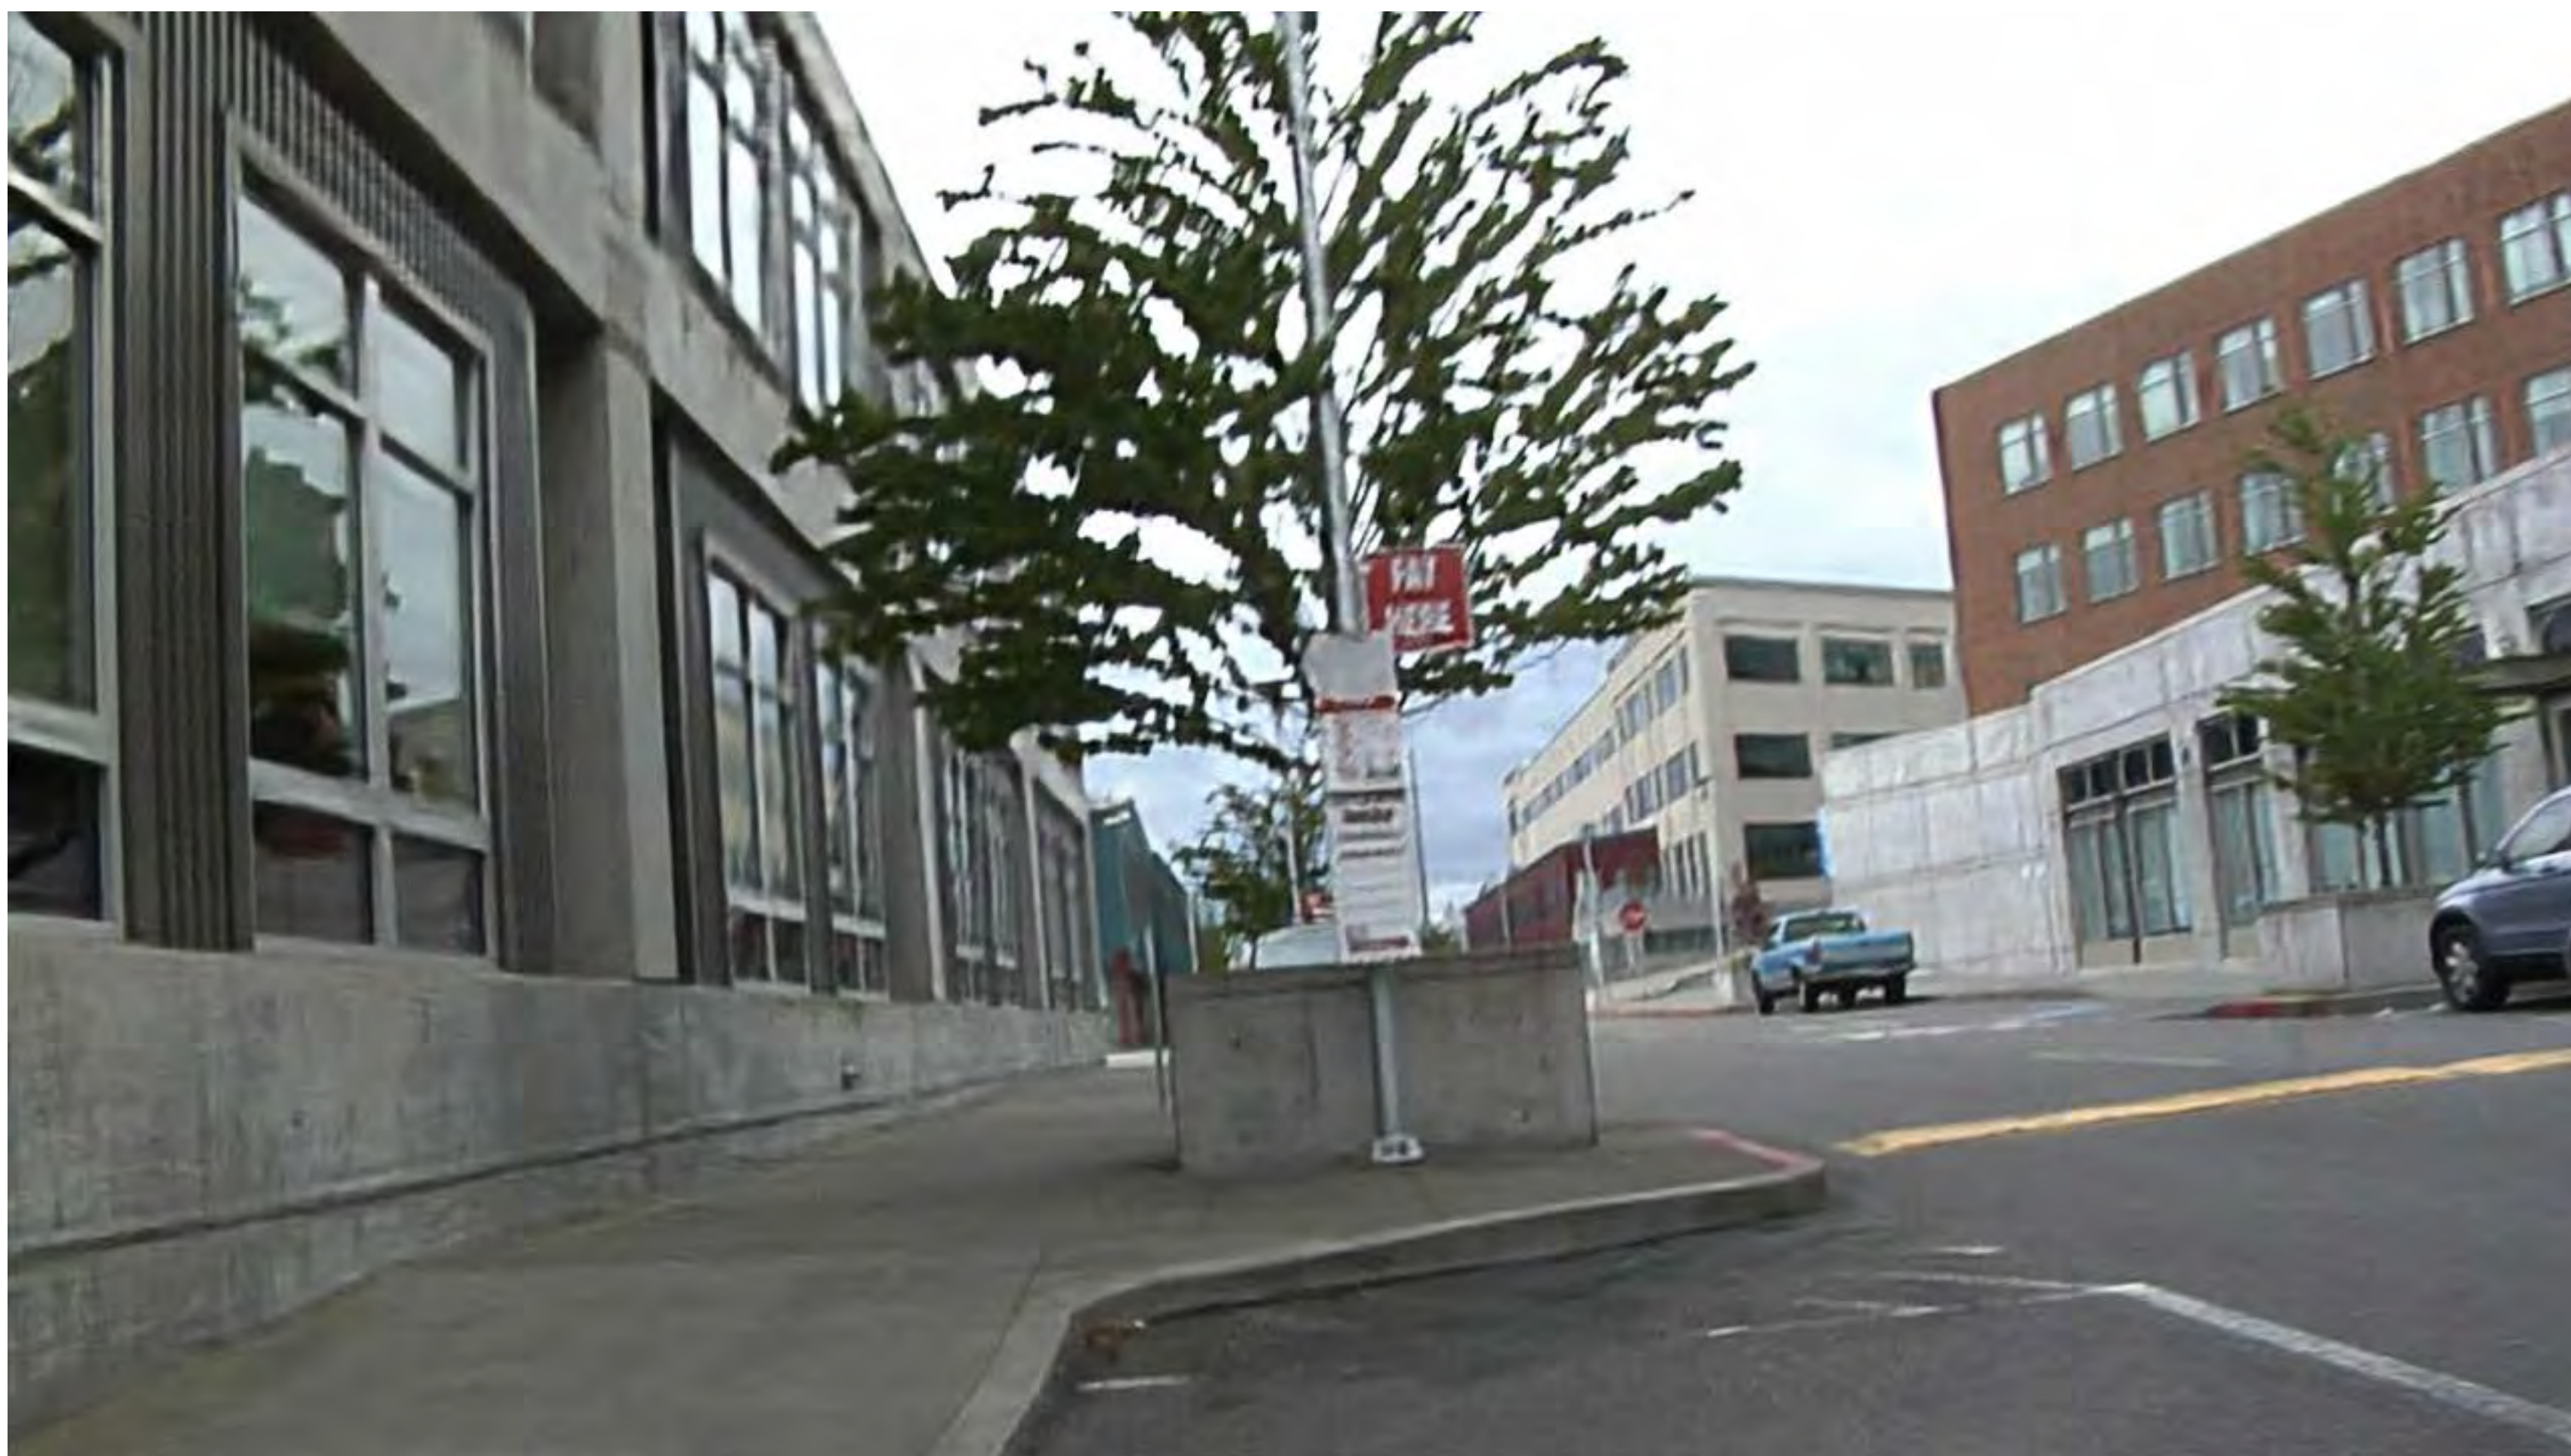

DBN+Noalign



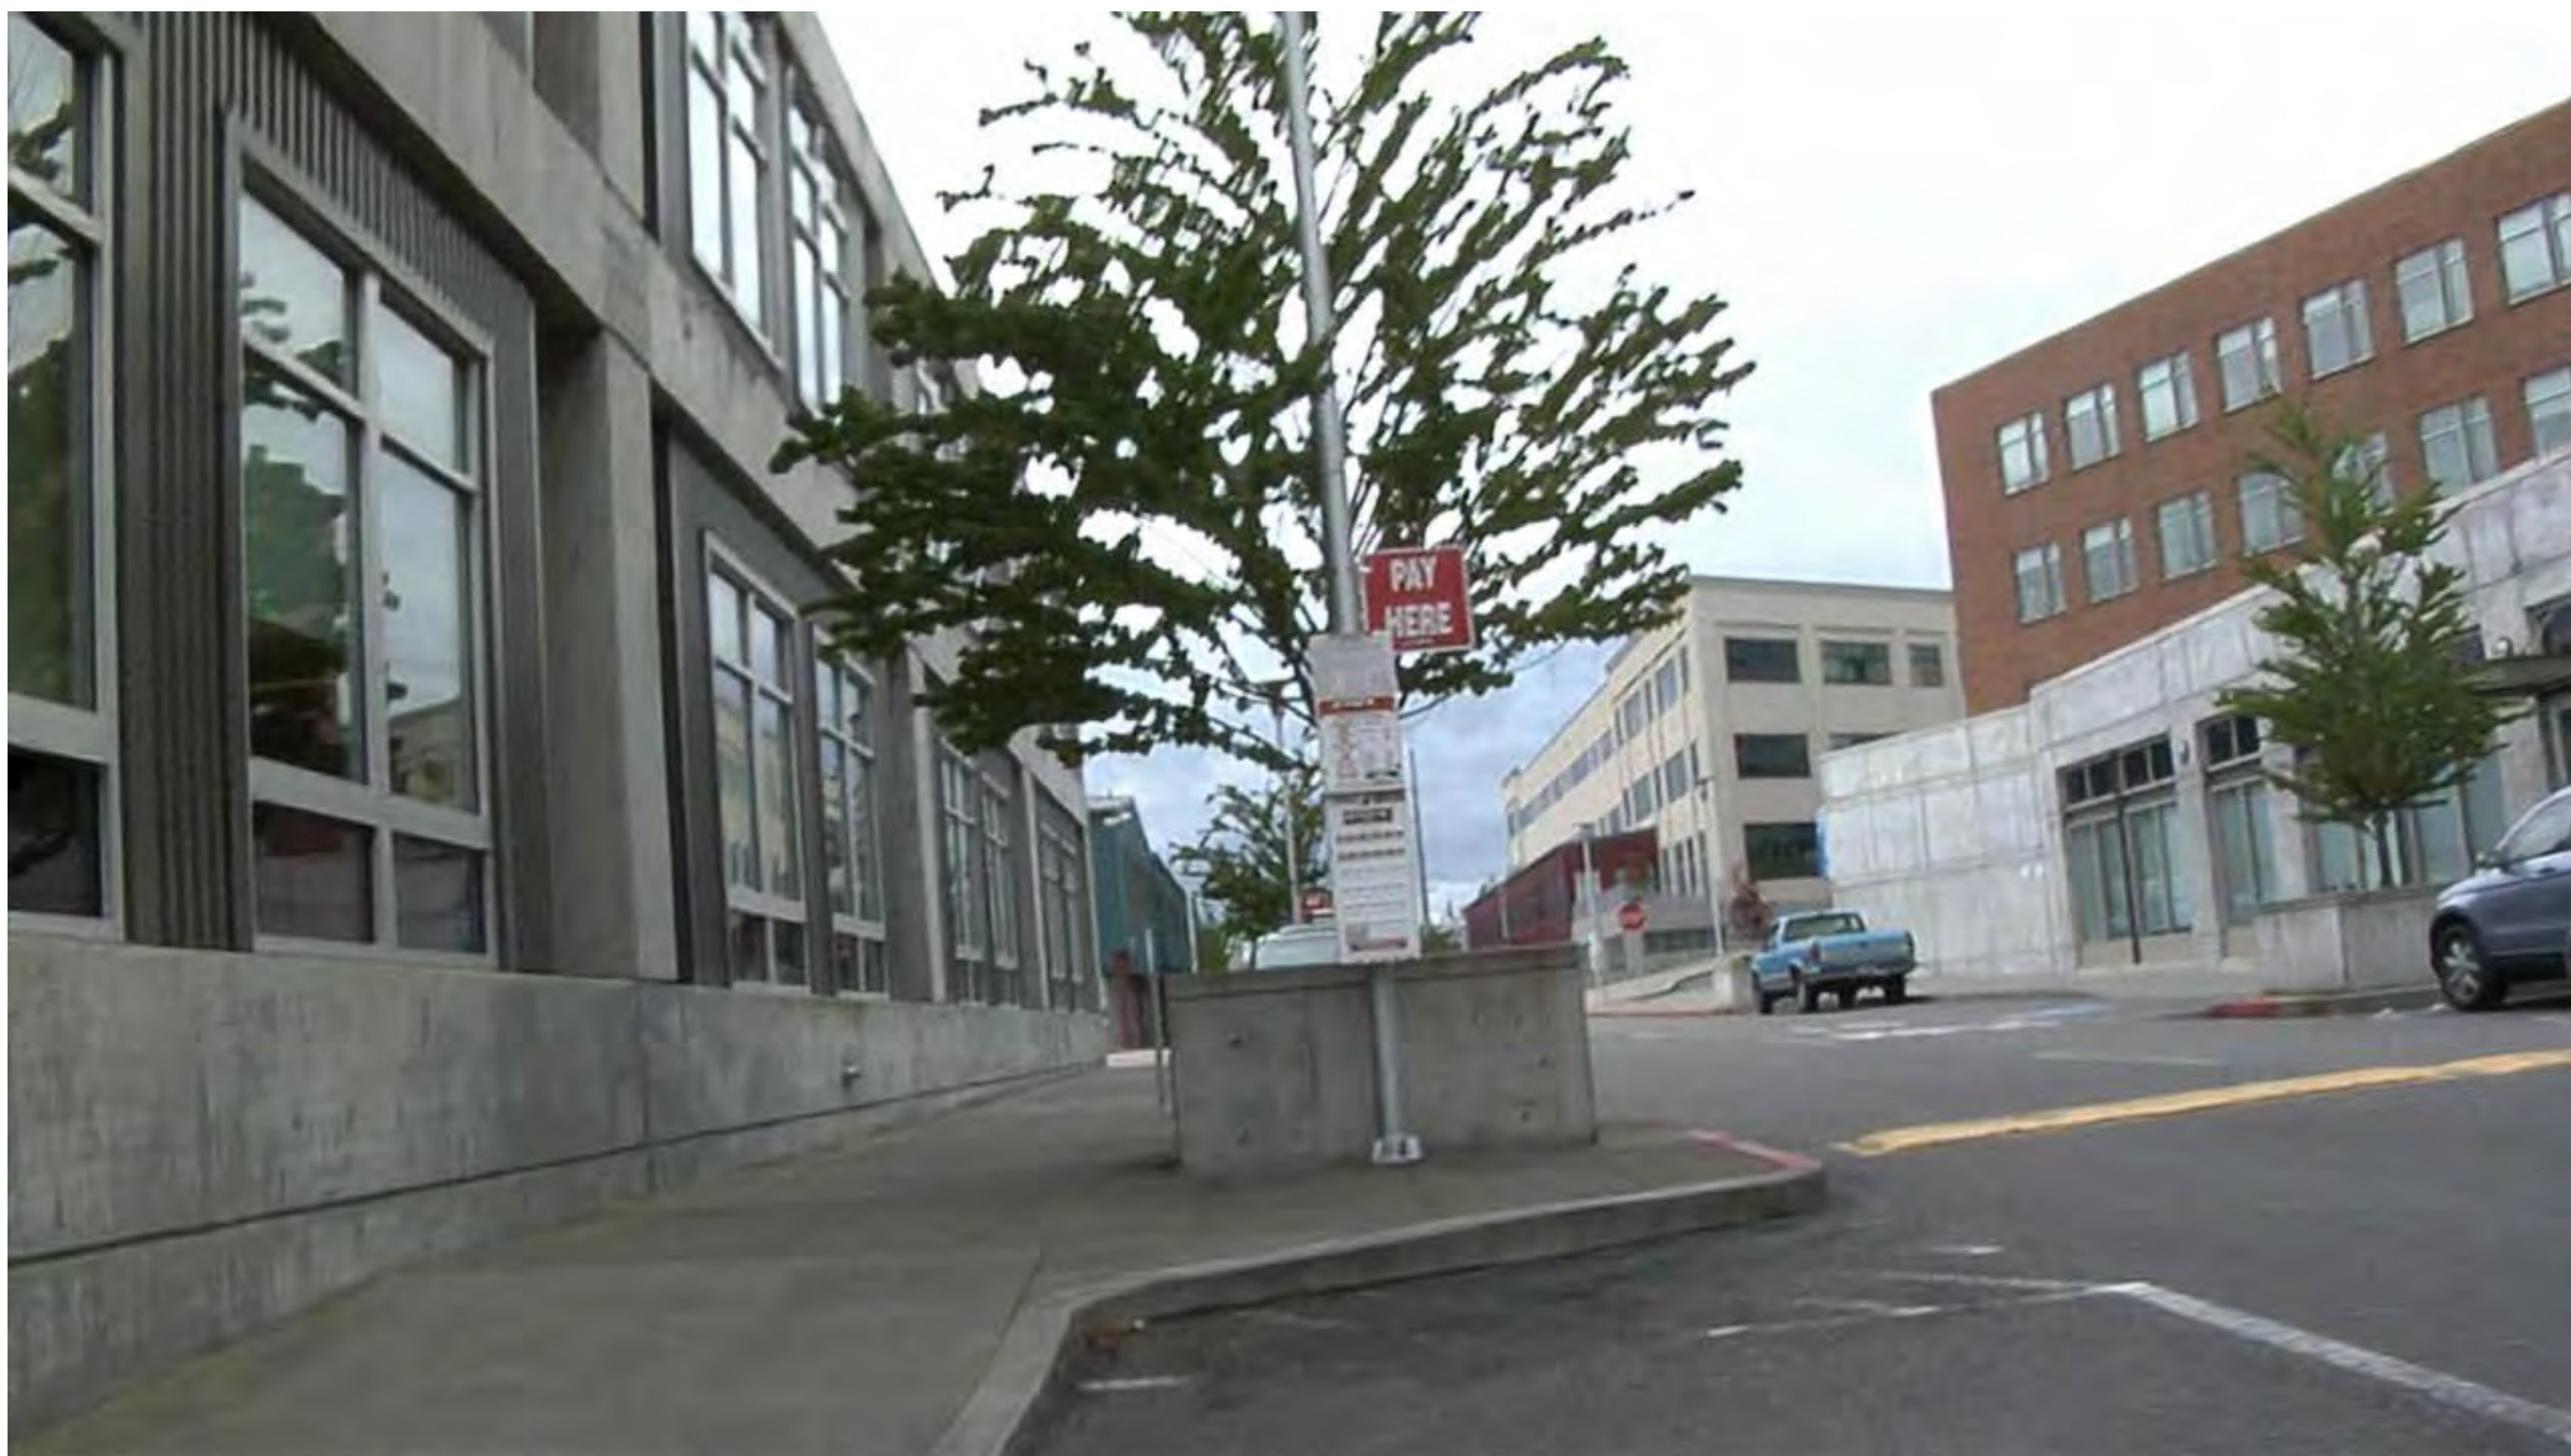

DBN+Homog



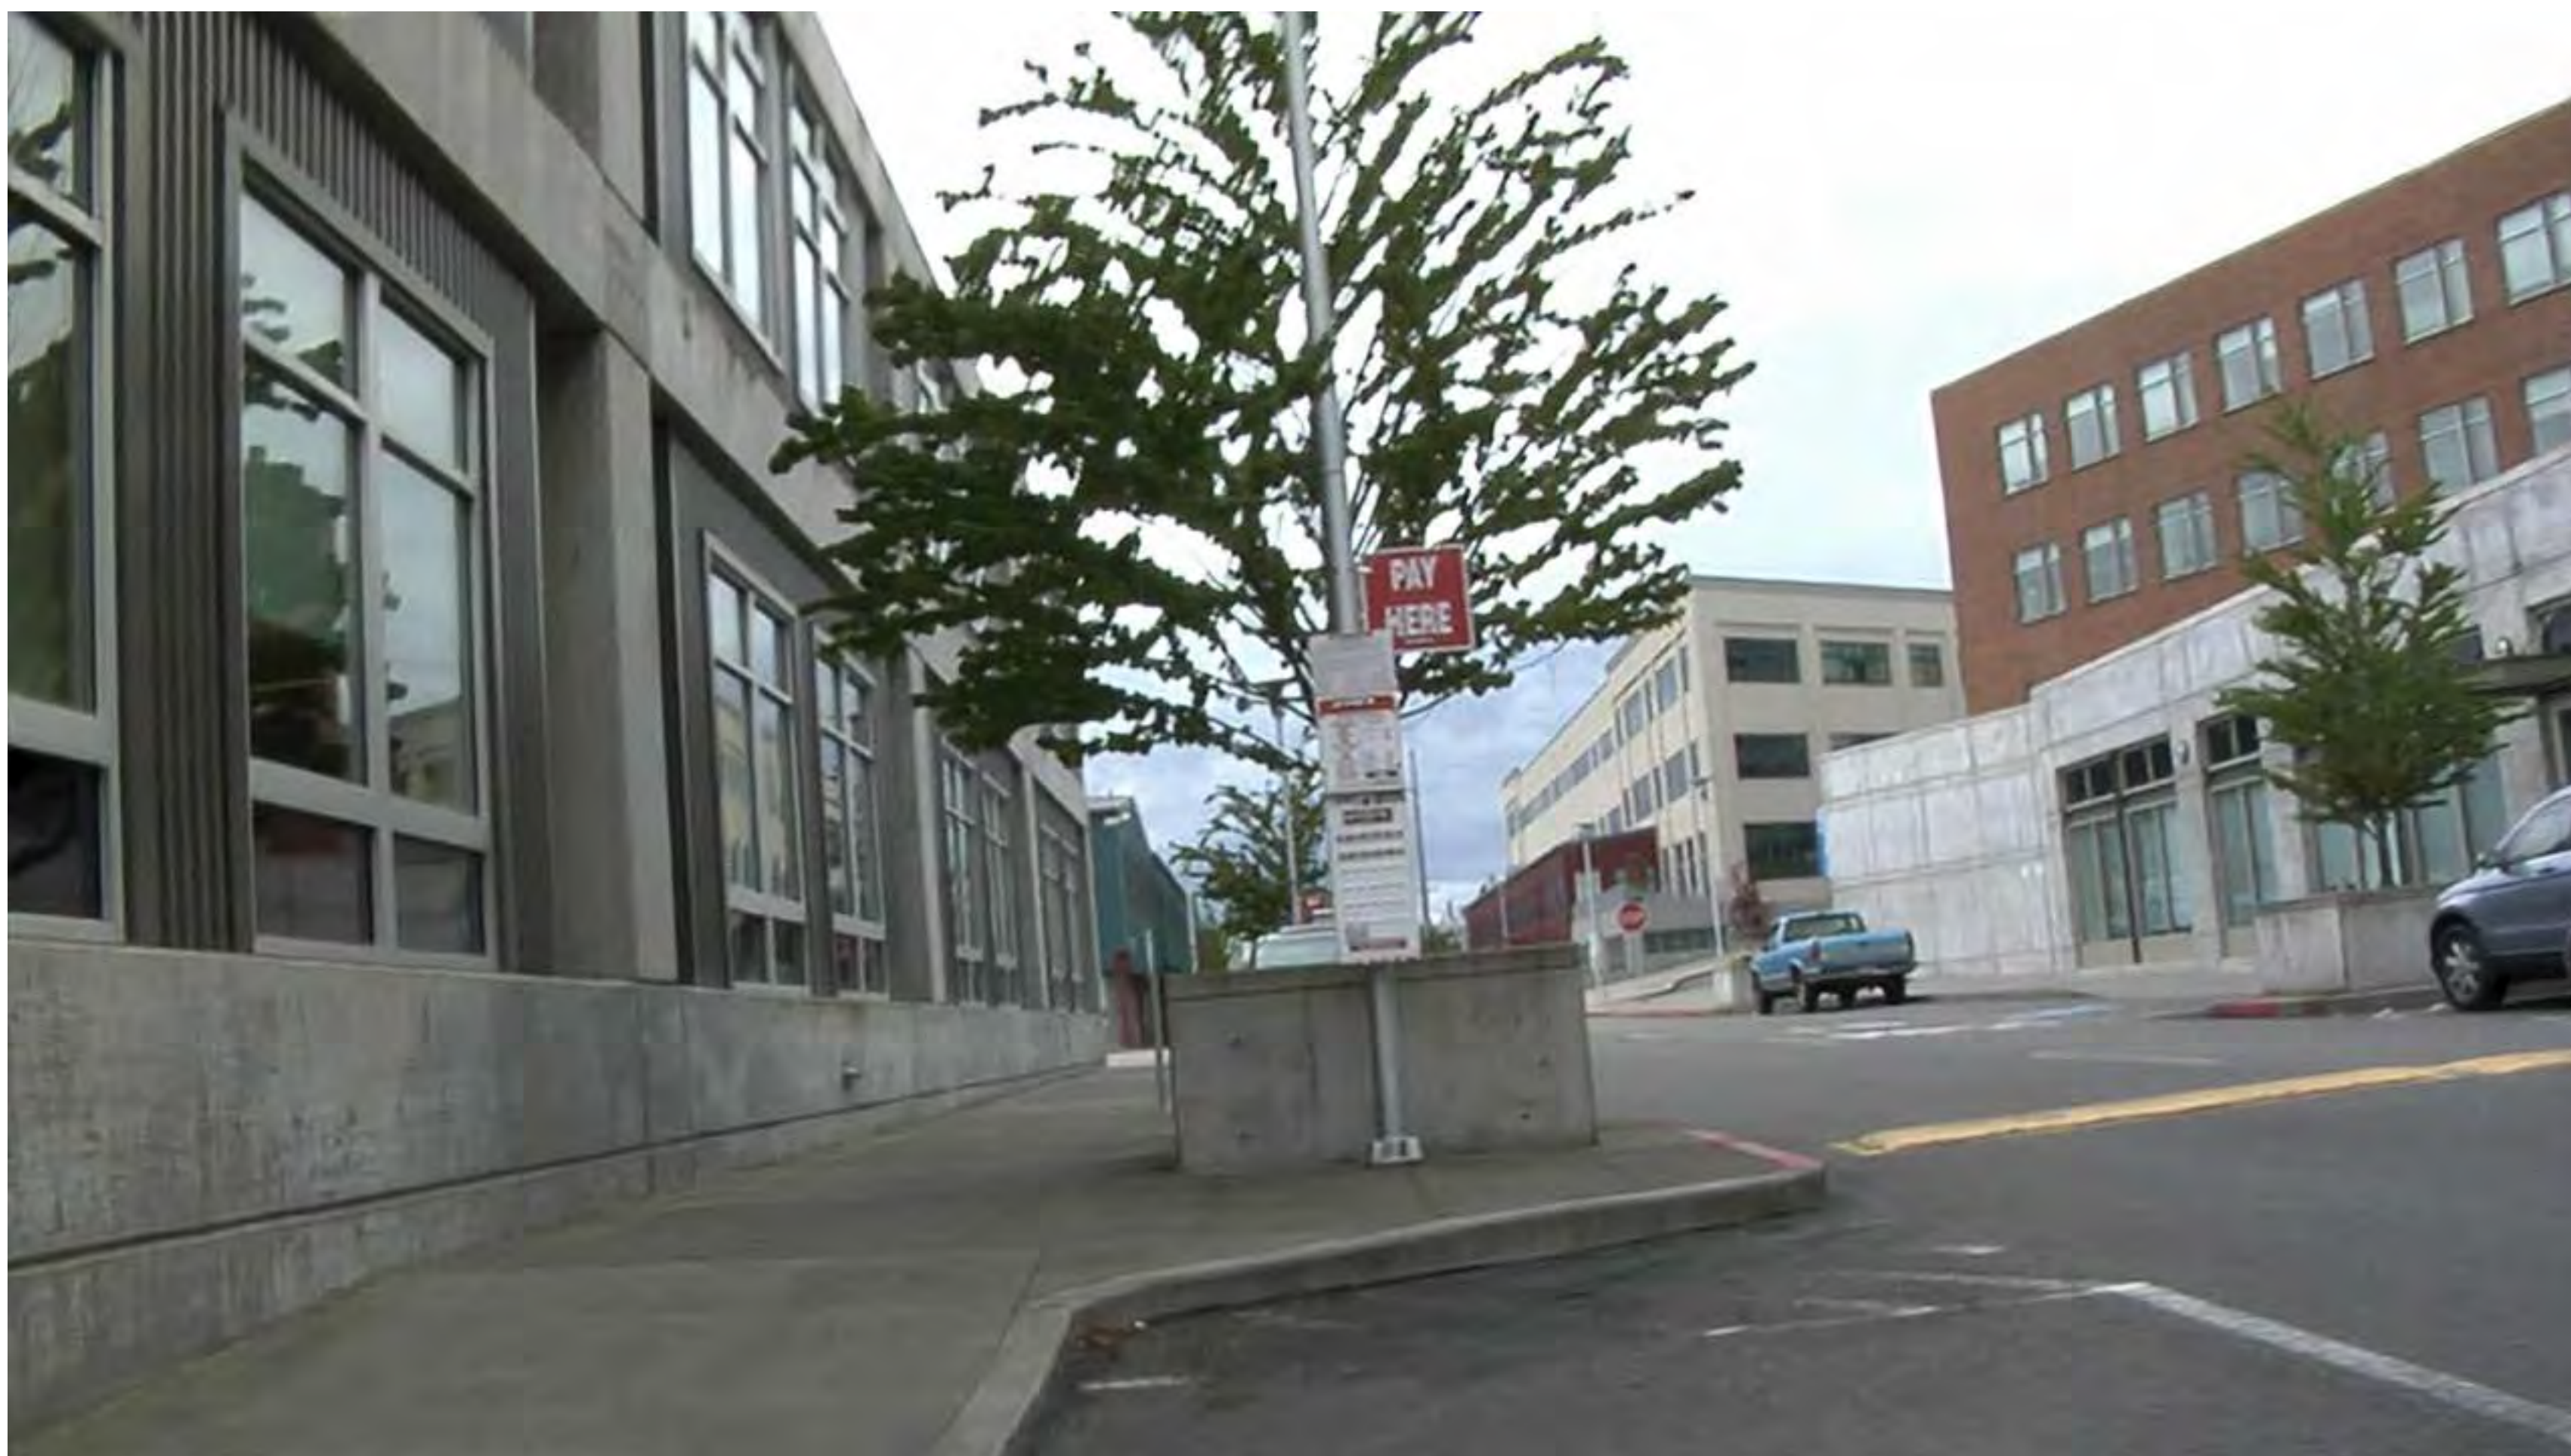

DBN+Flow



# Additional Results



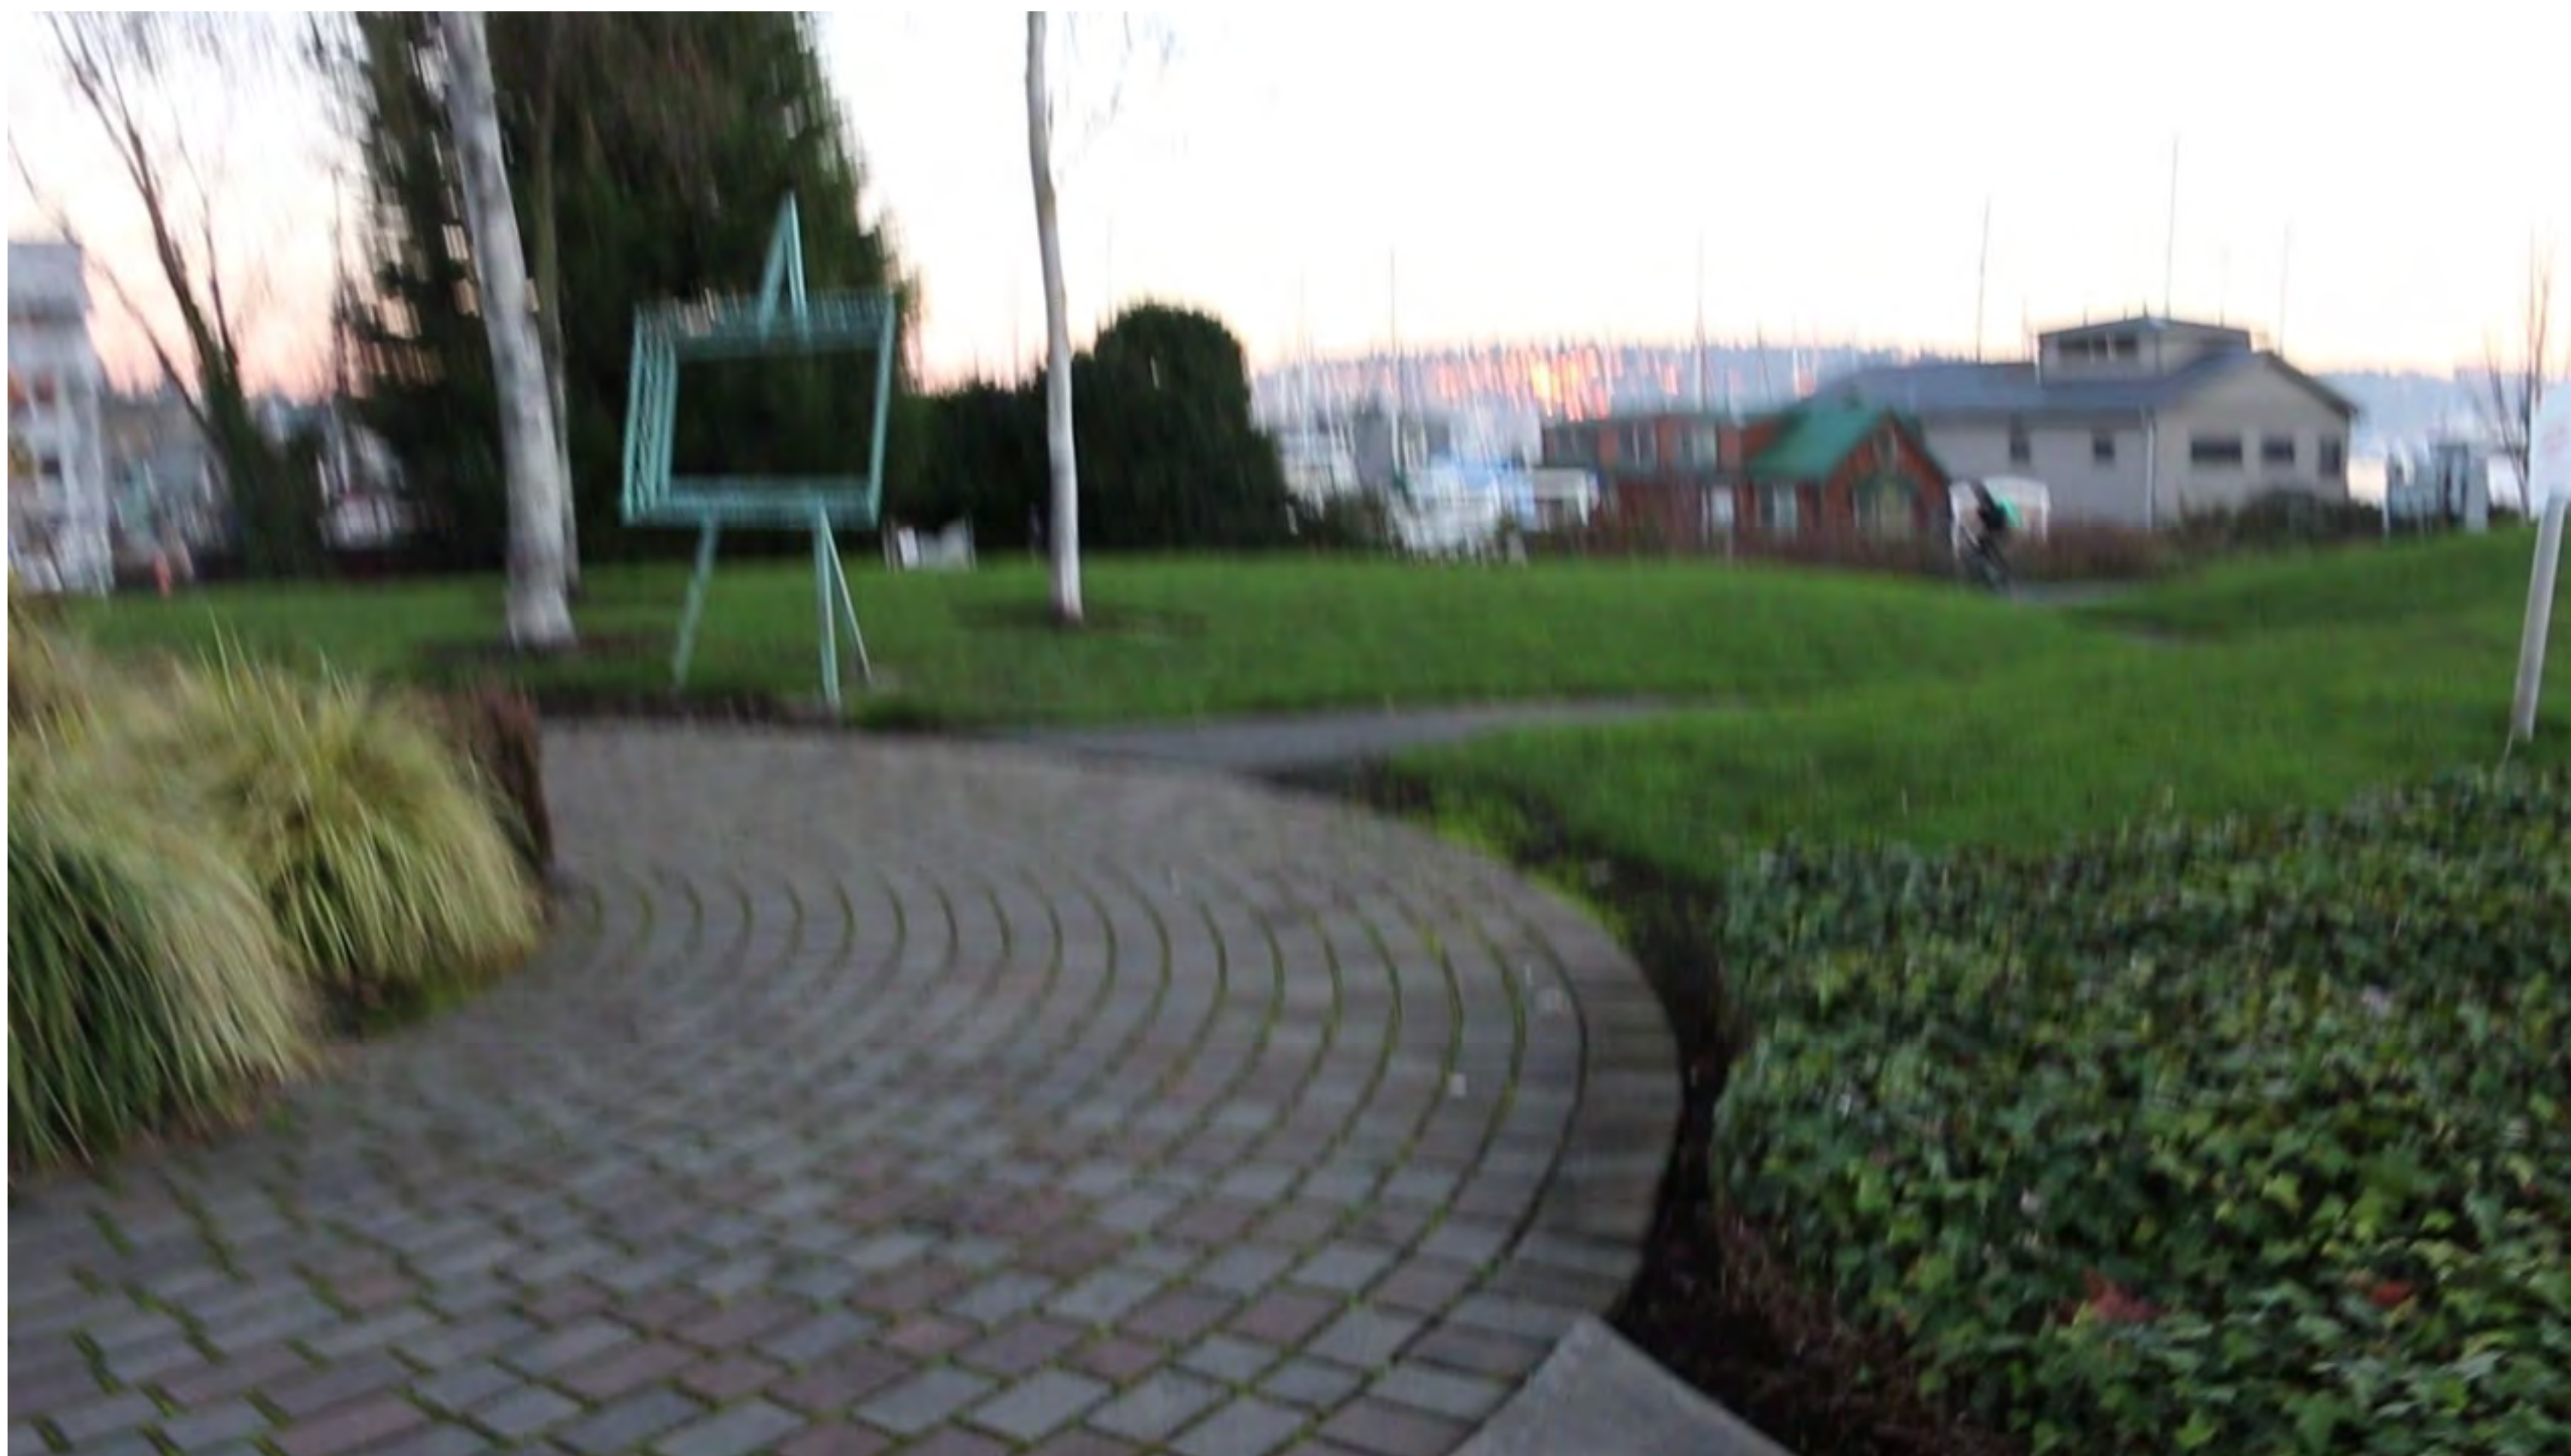

input



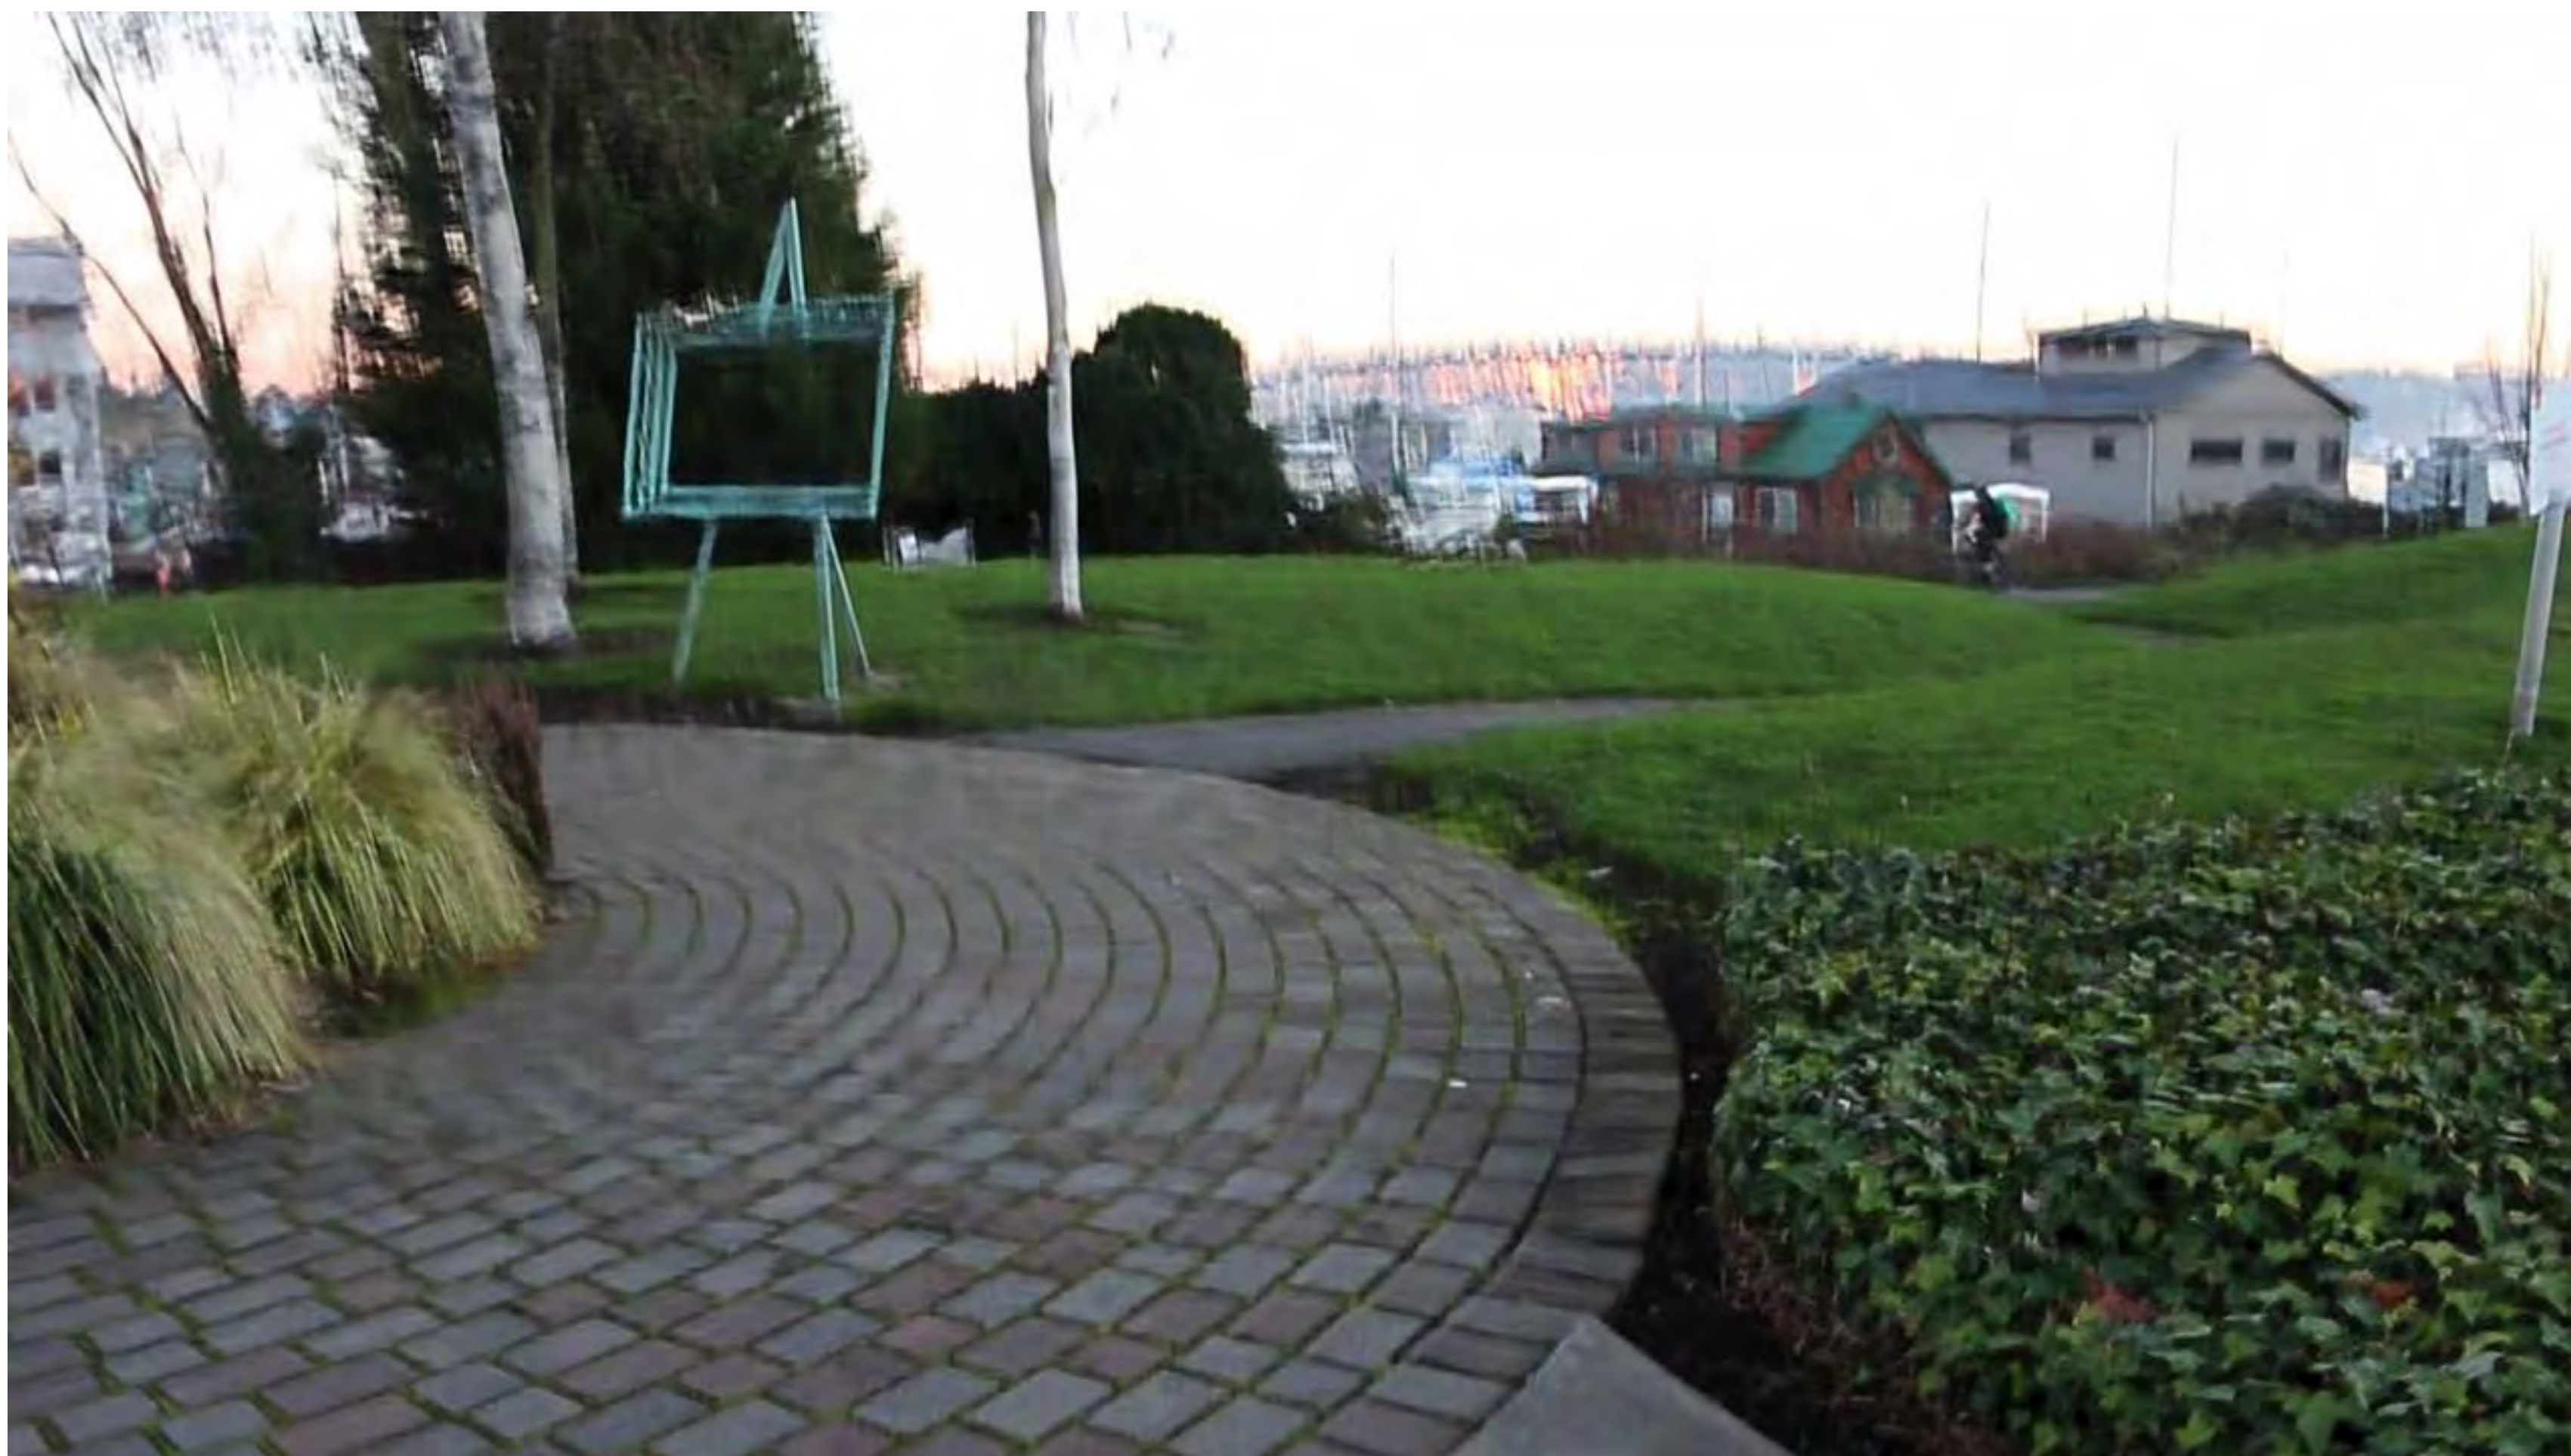

DBN+Noalign



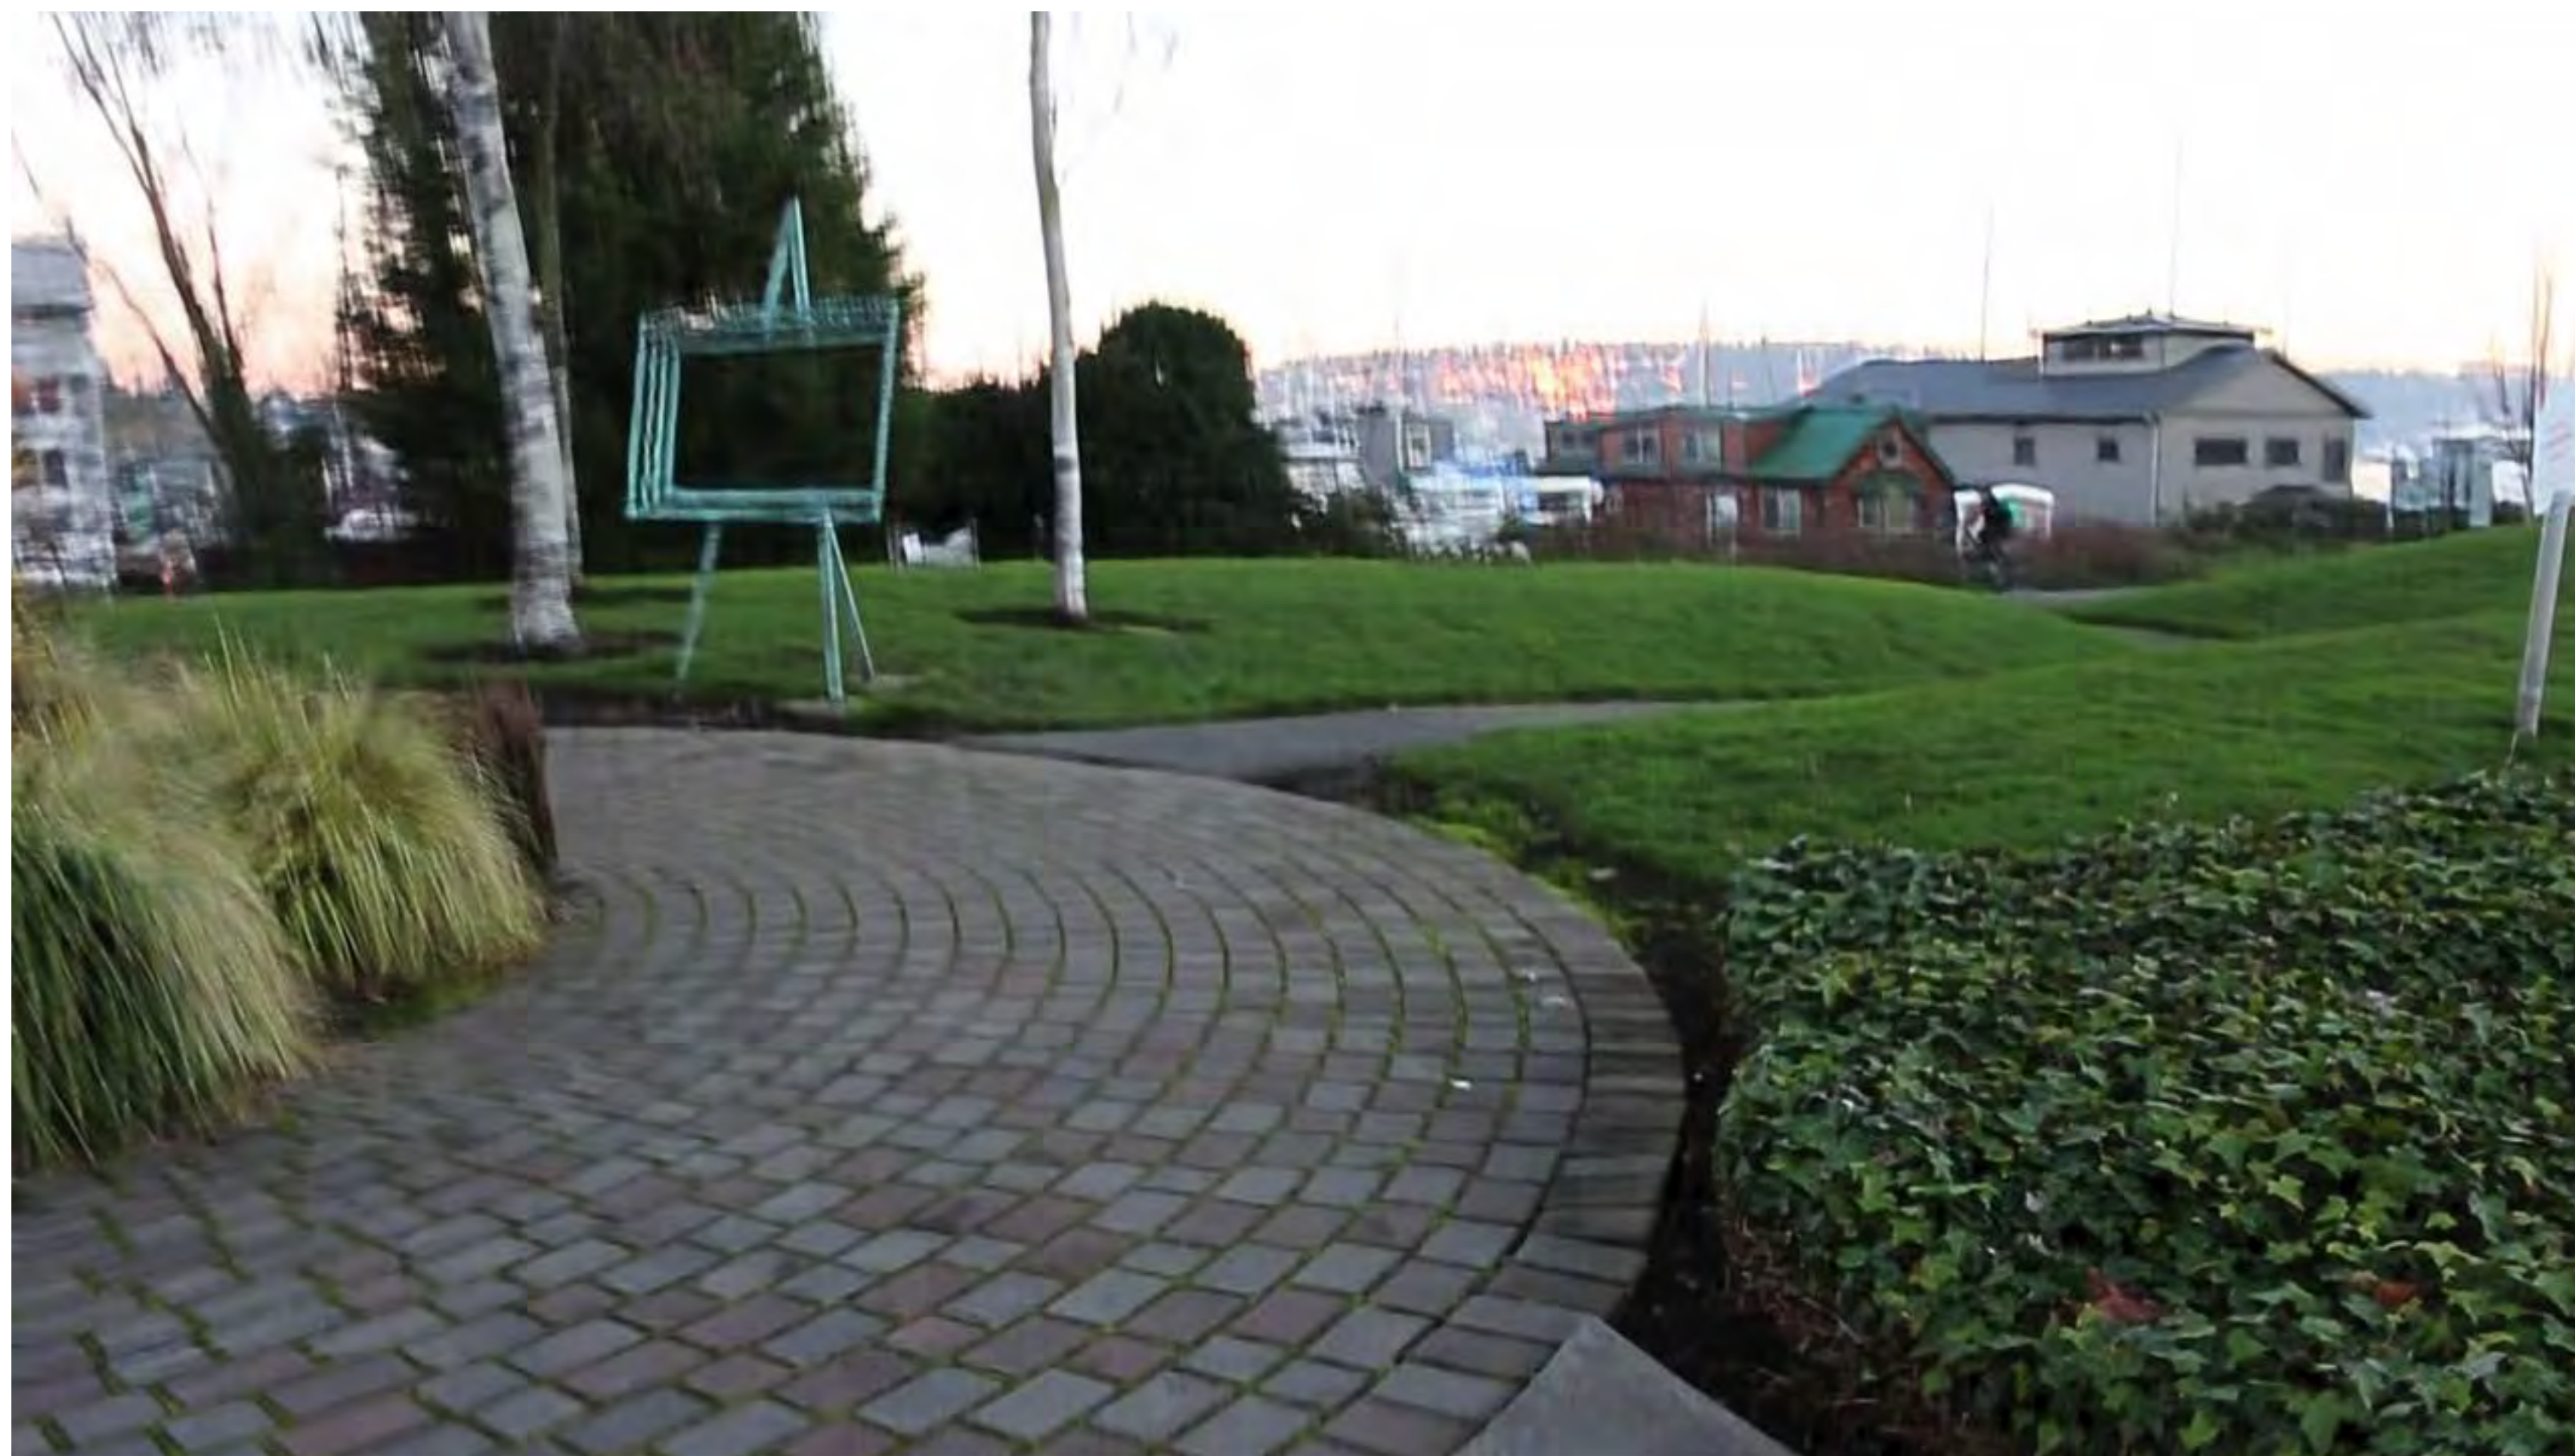

DBN+Homog



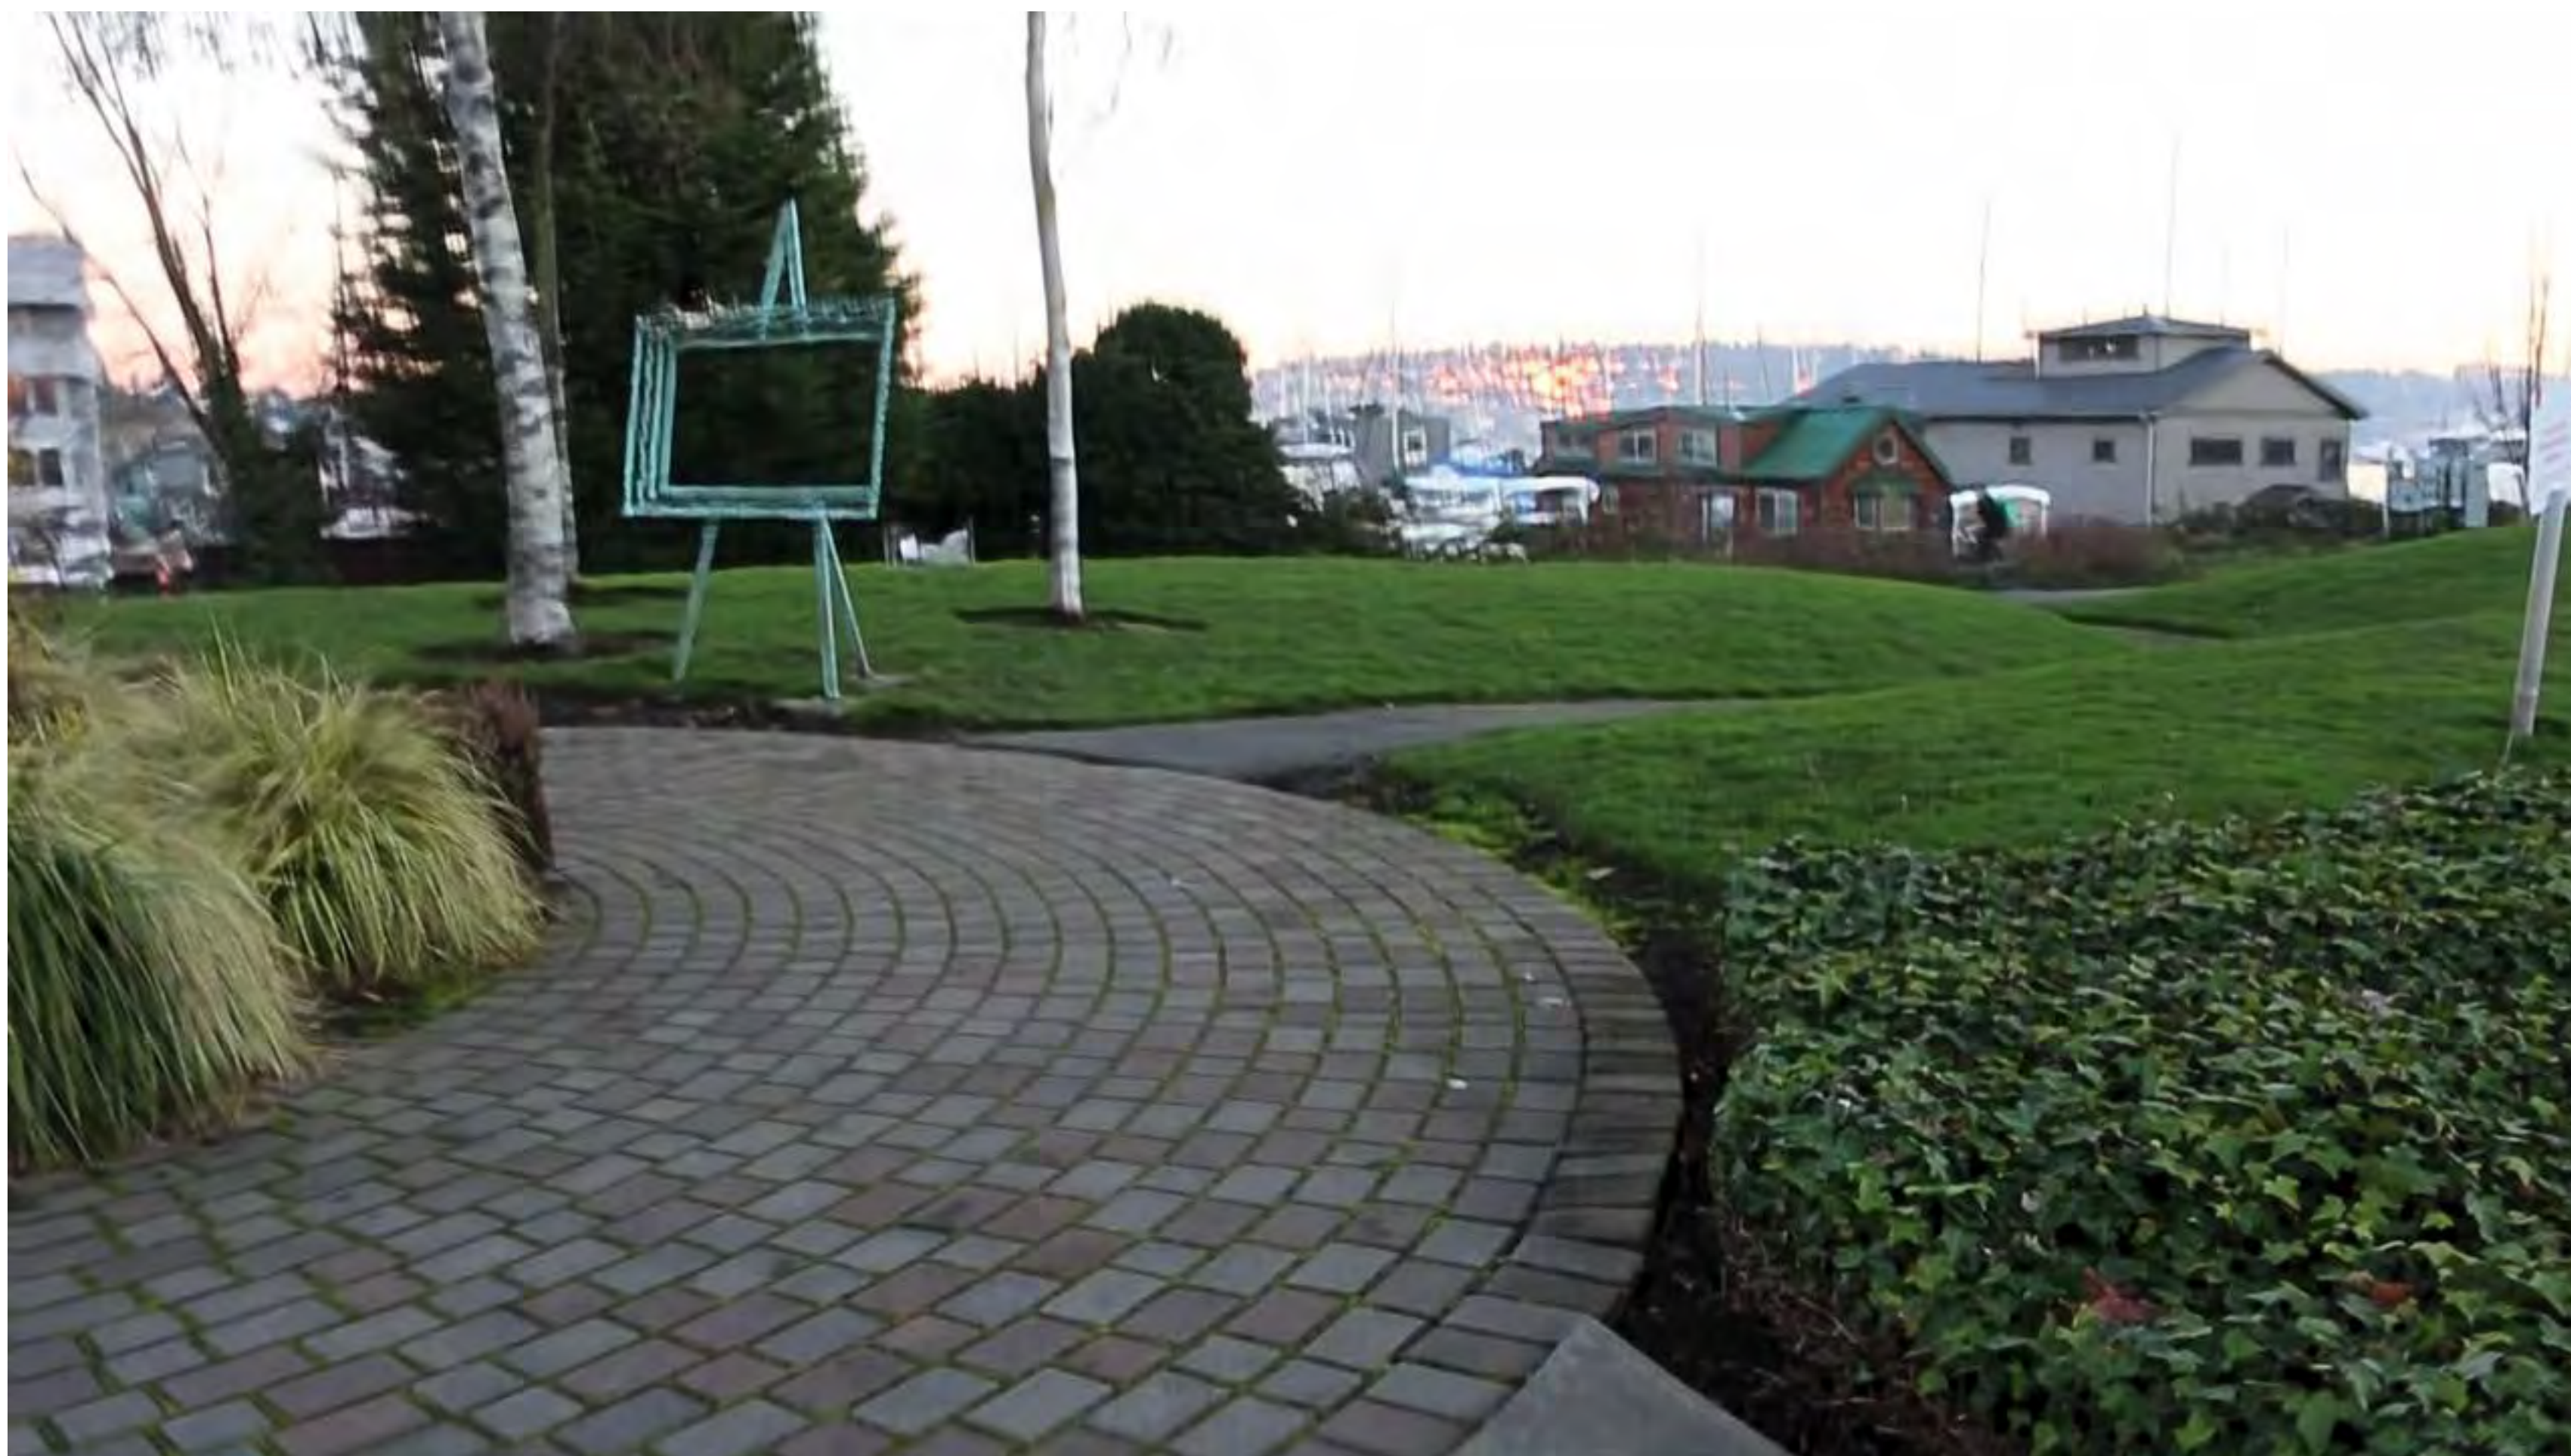

DBN+Flow



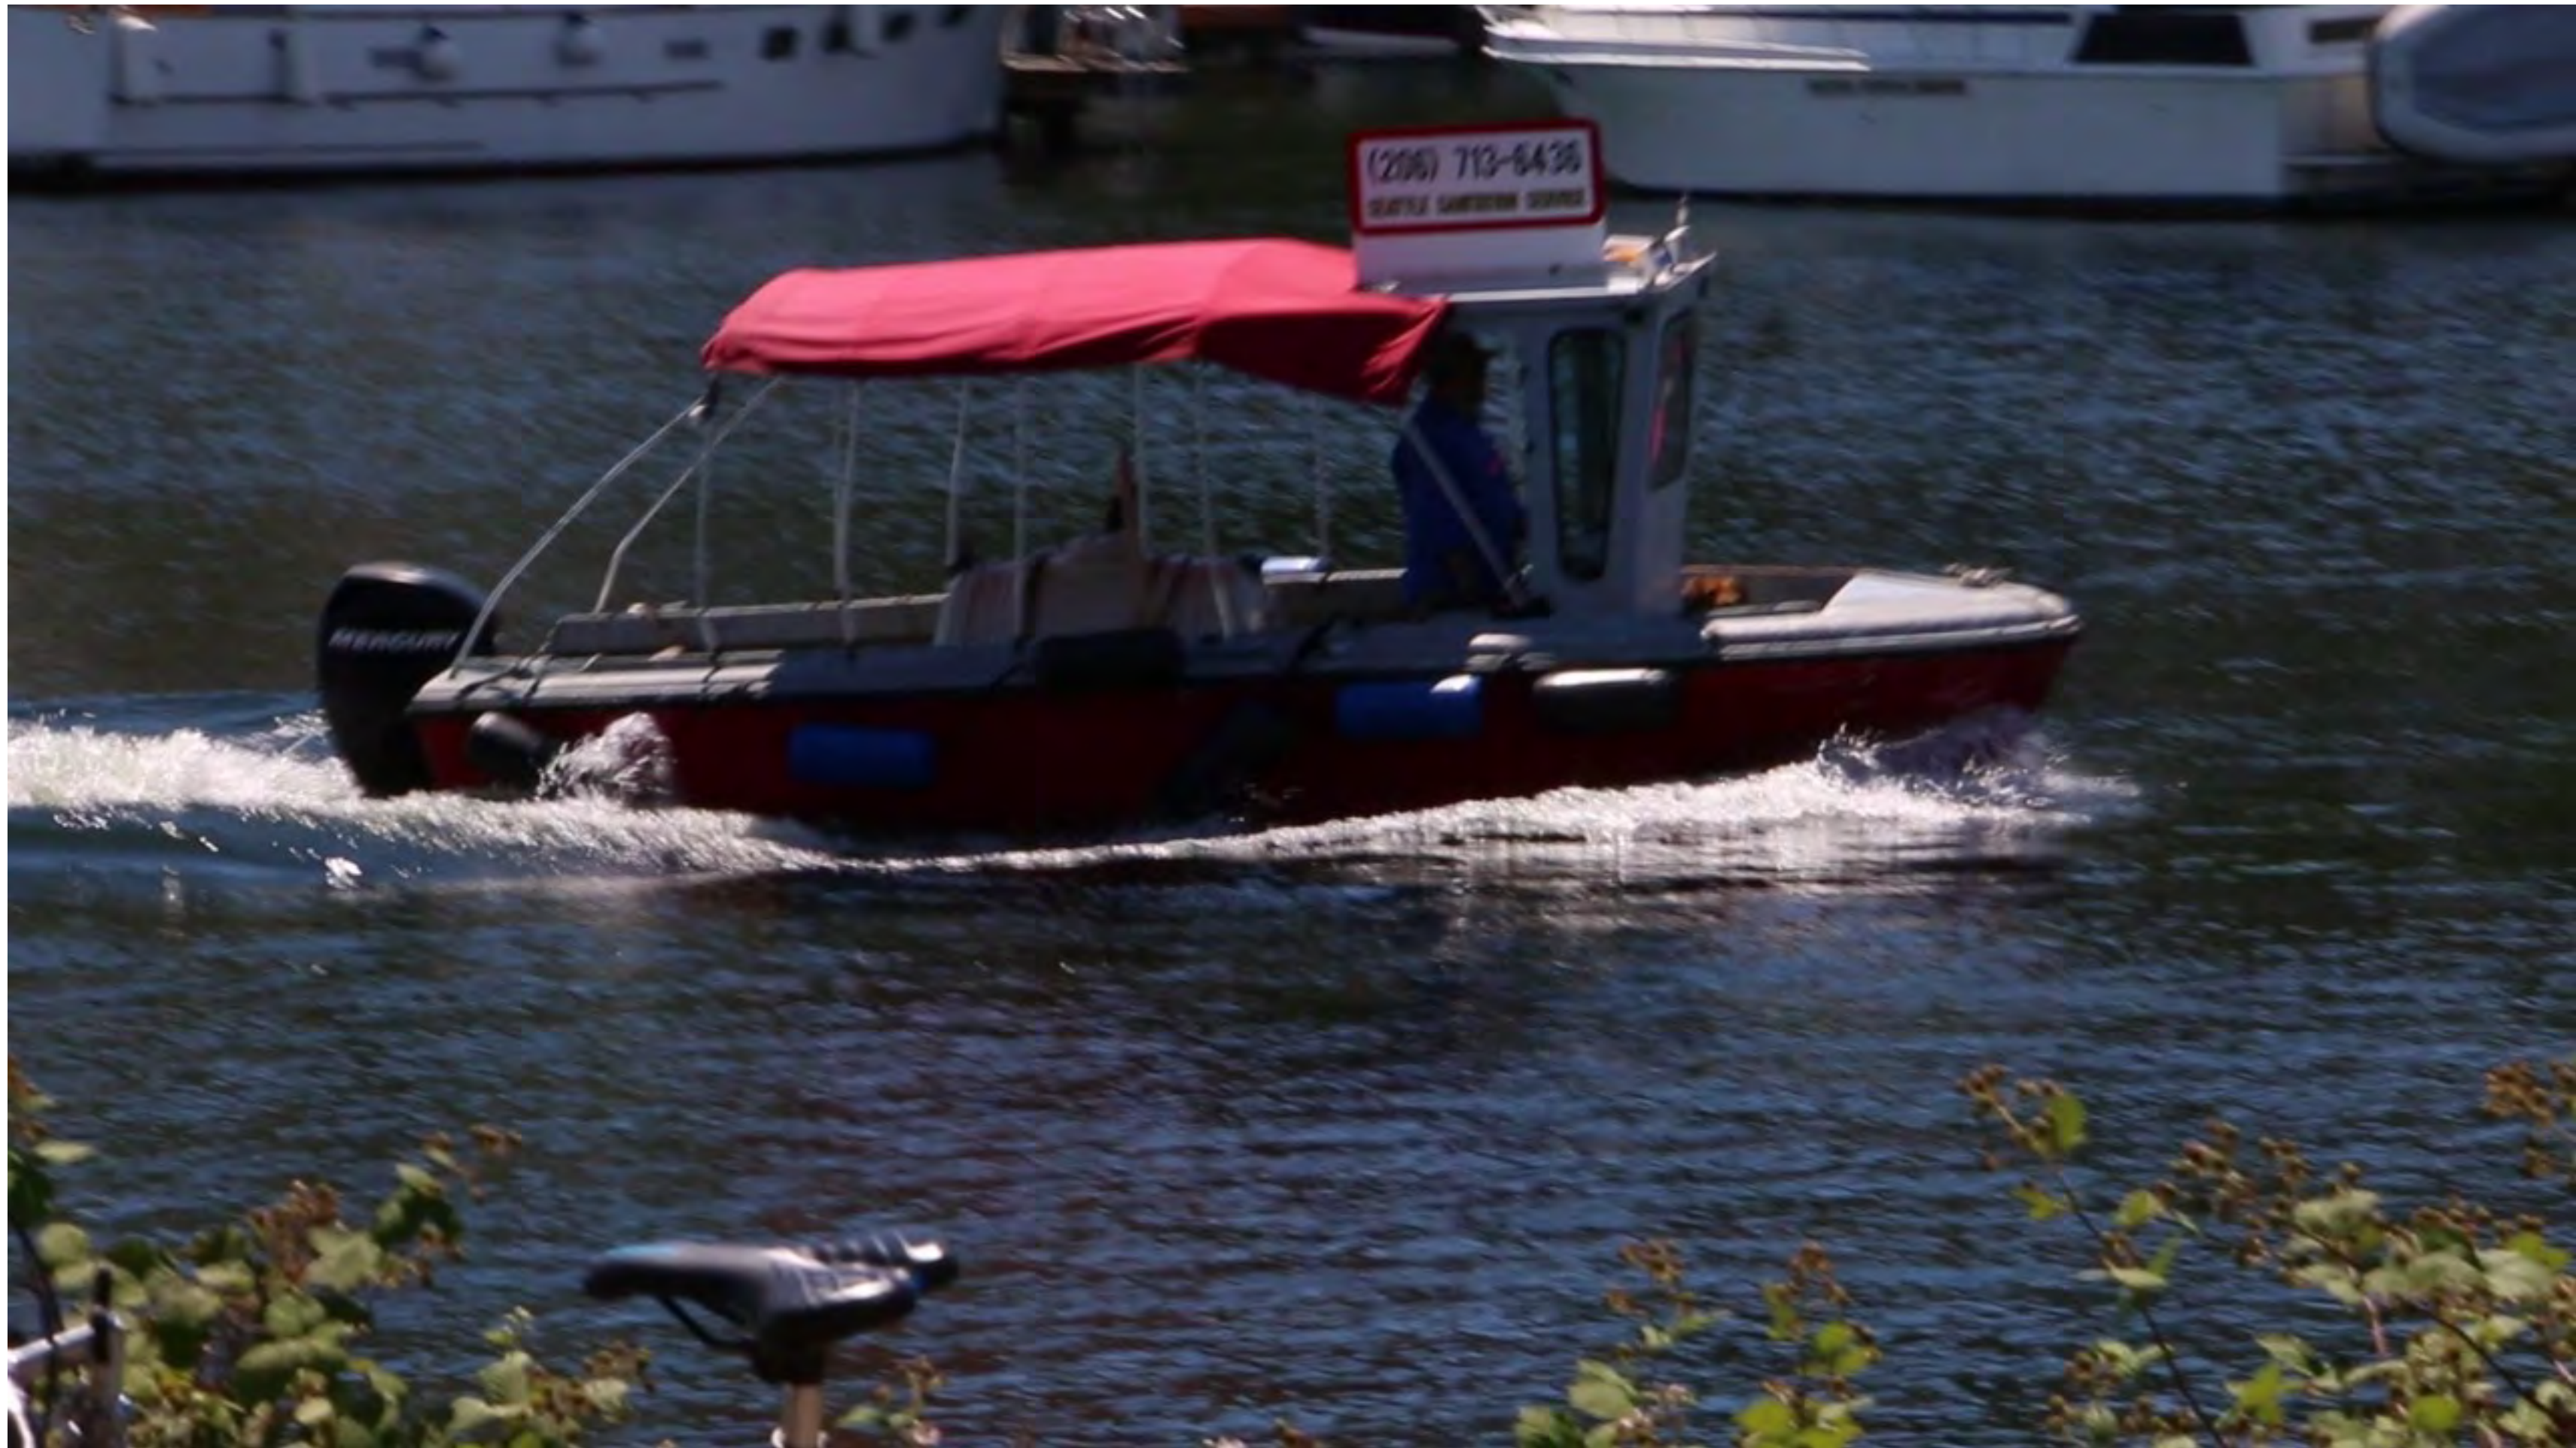

input



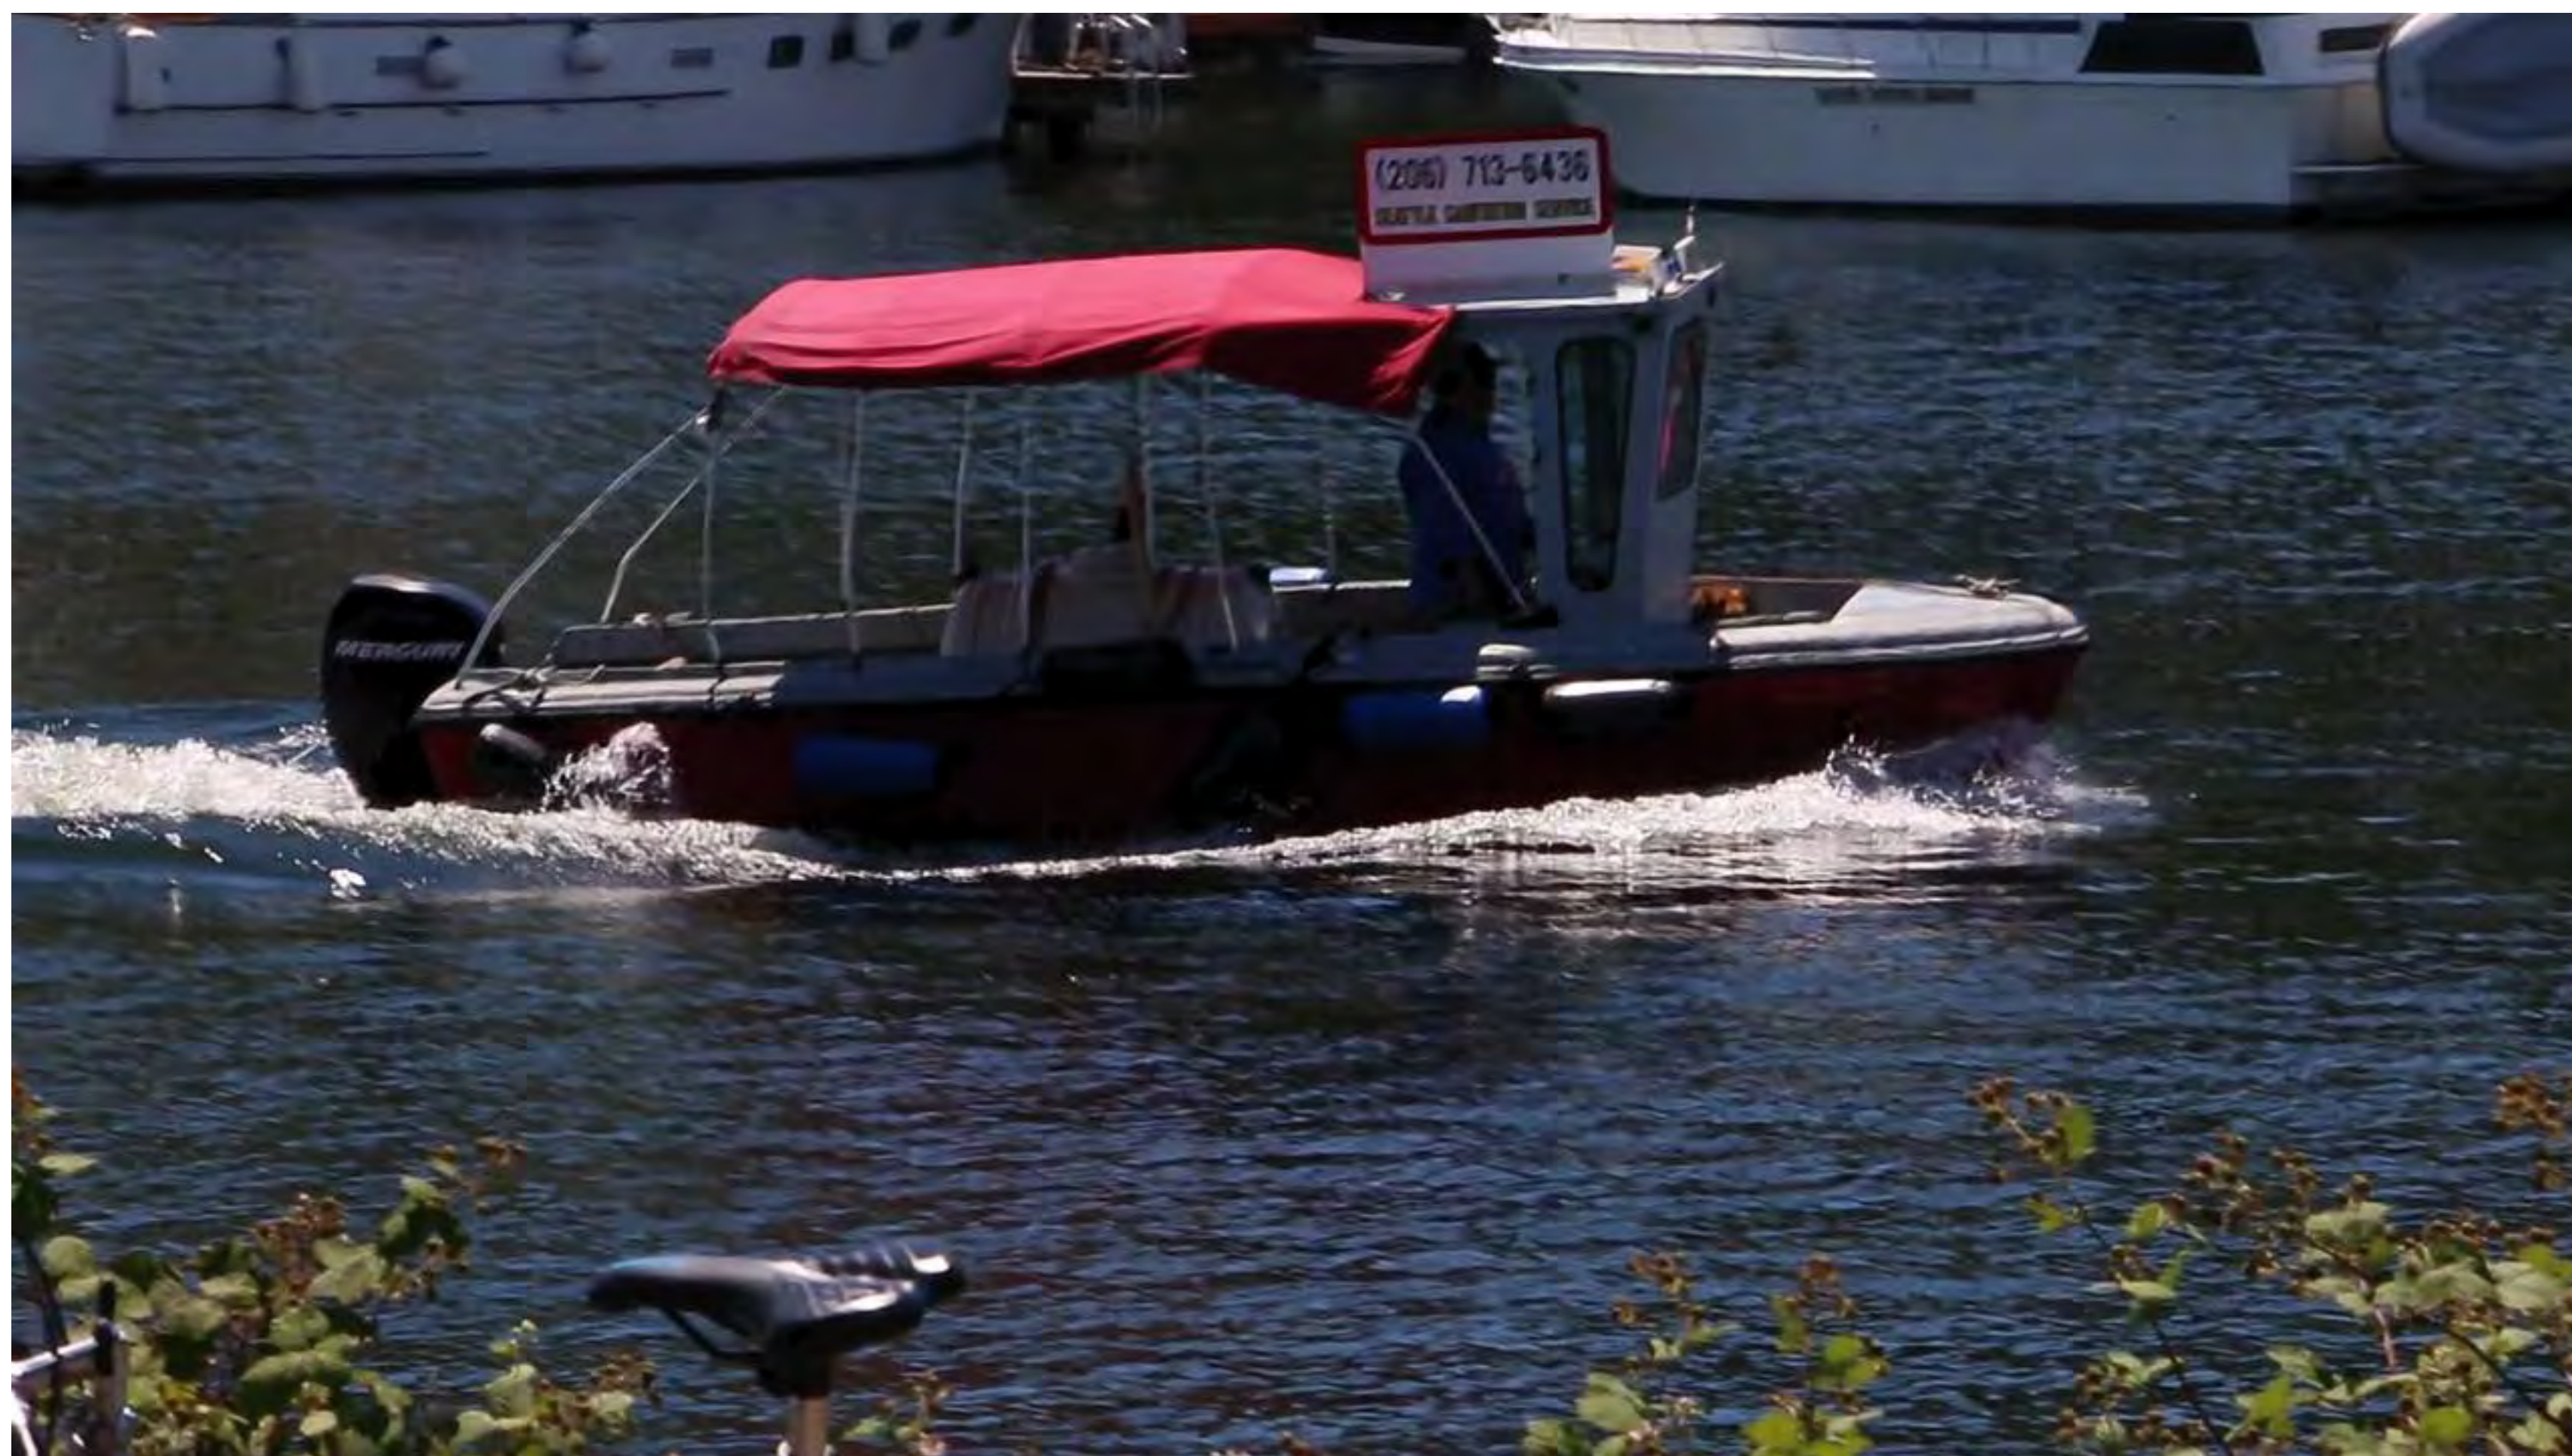

DBN+Noalign



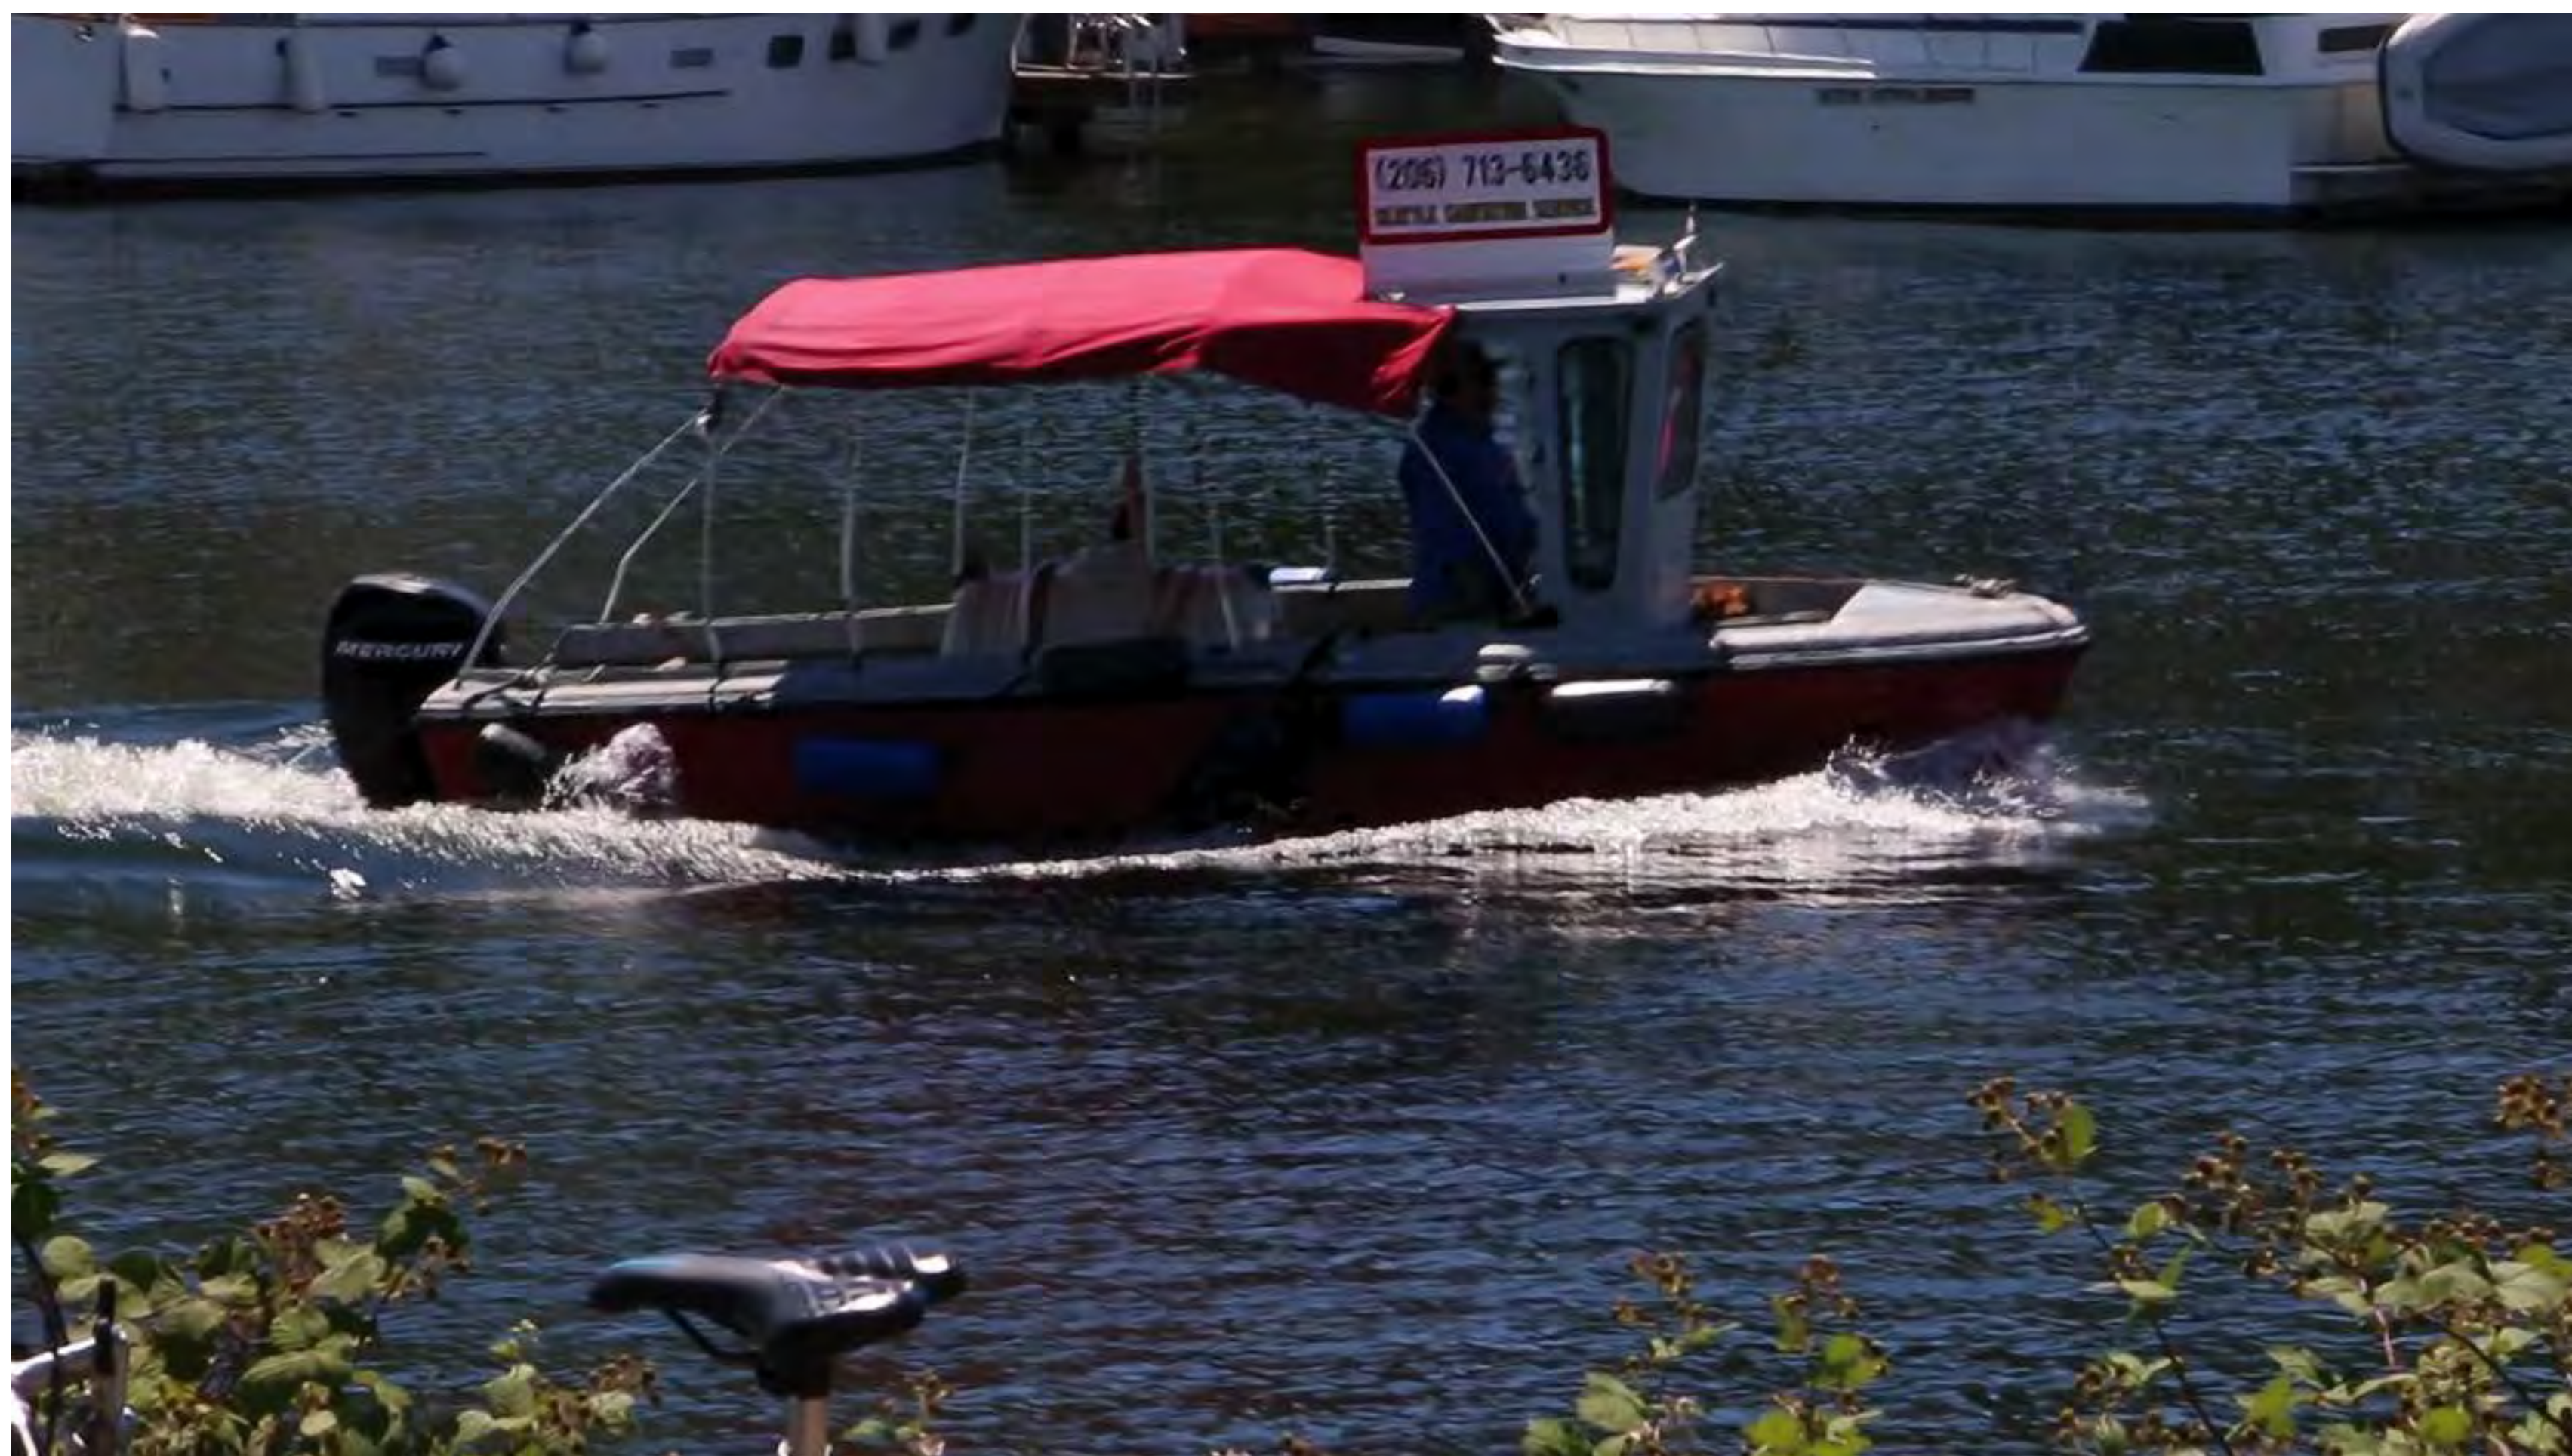

DBN+Homog



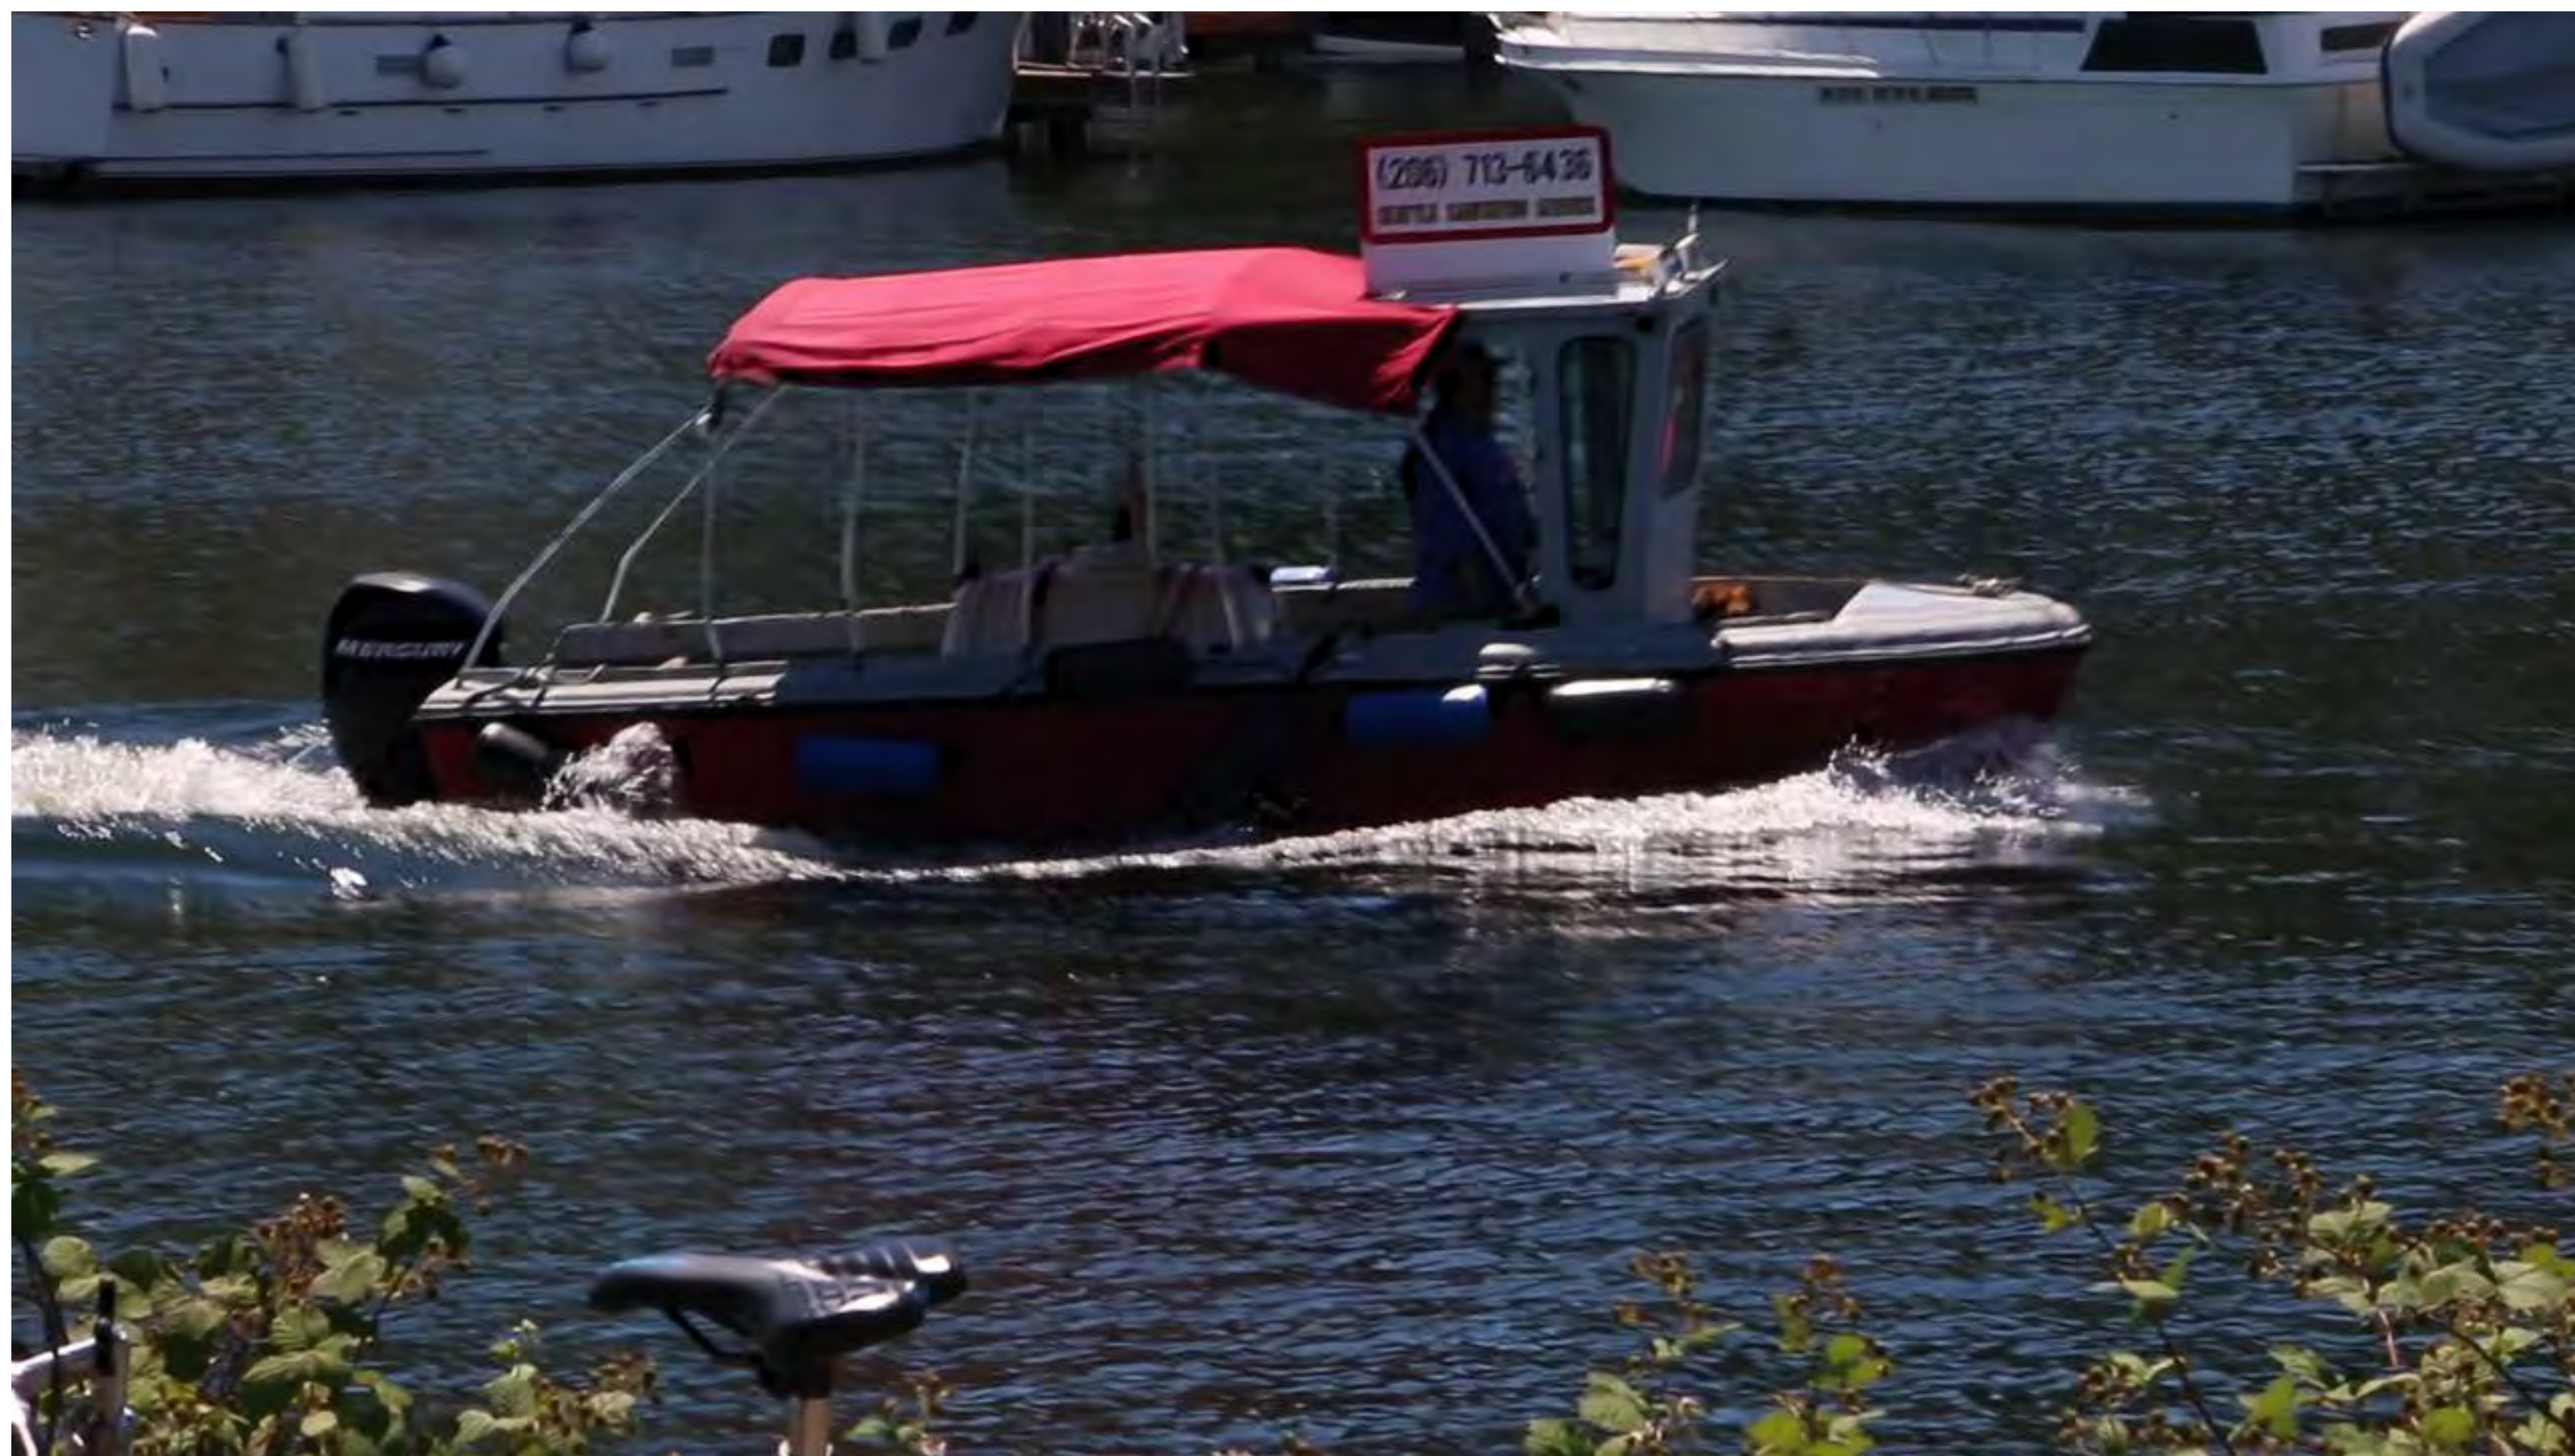

DBN+Flow



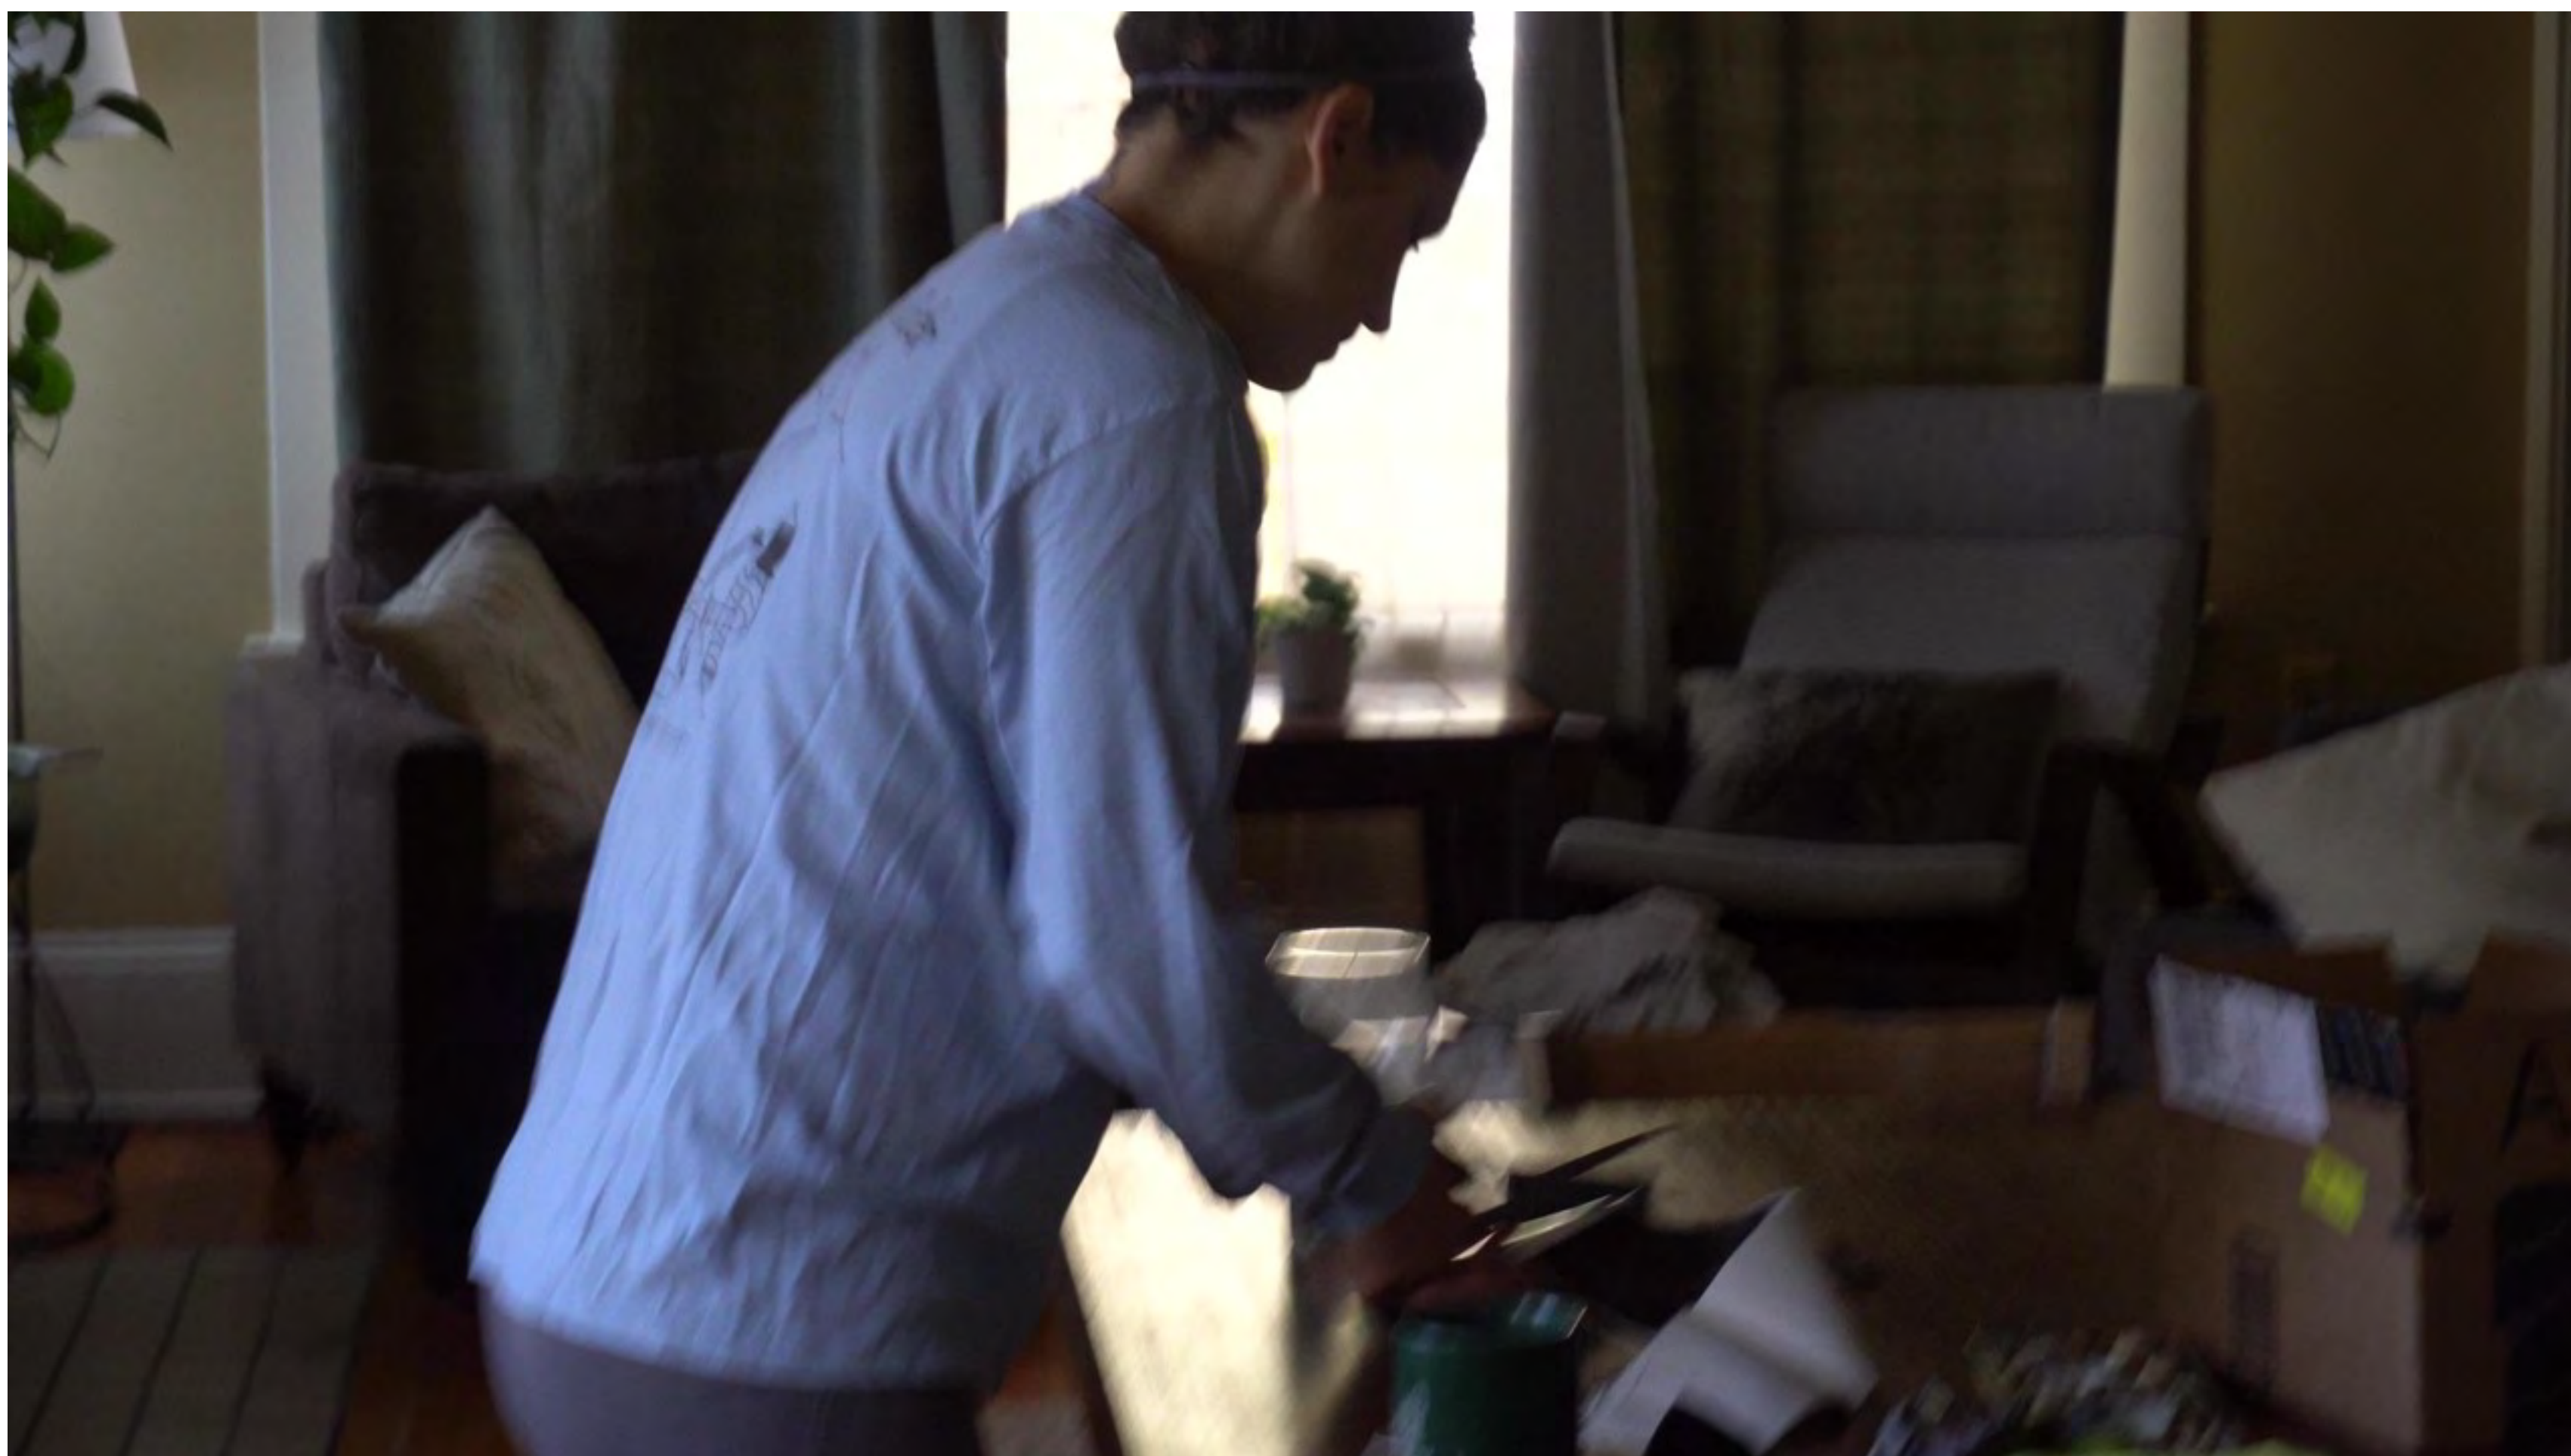

input



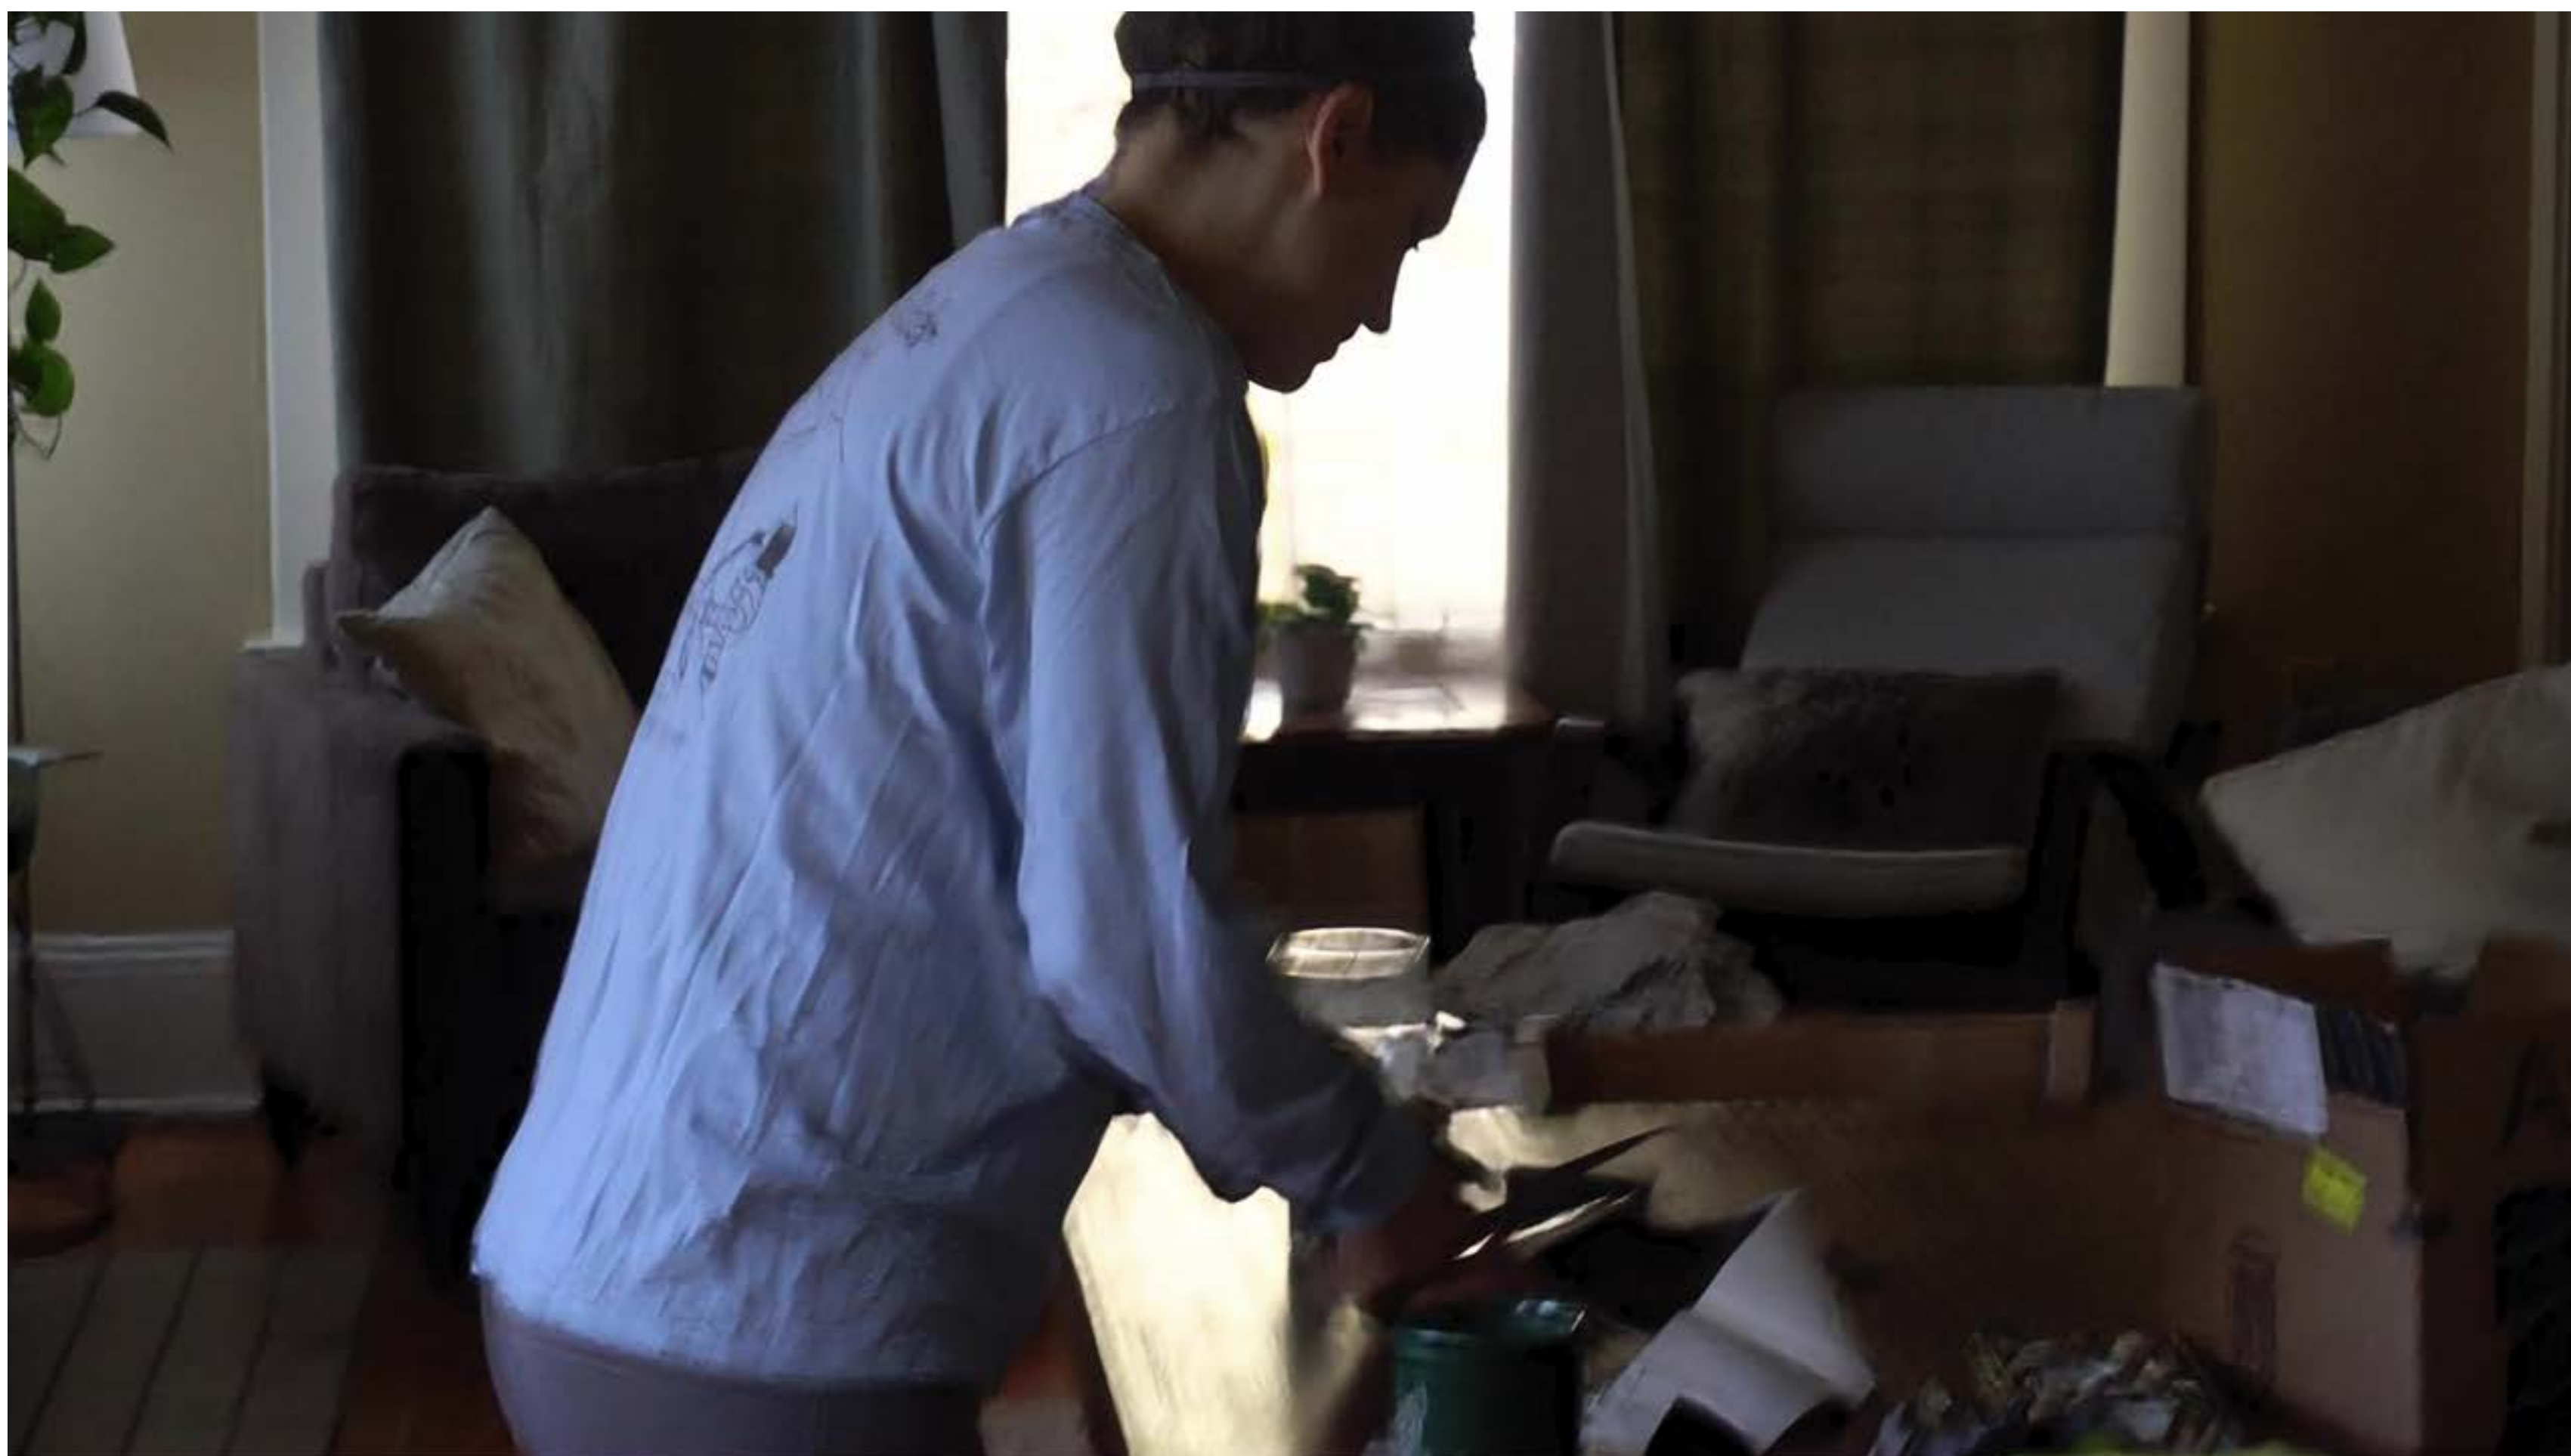

DBN+Noalign



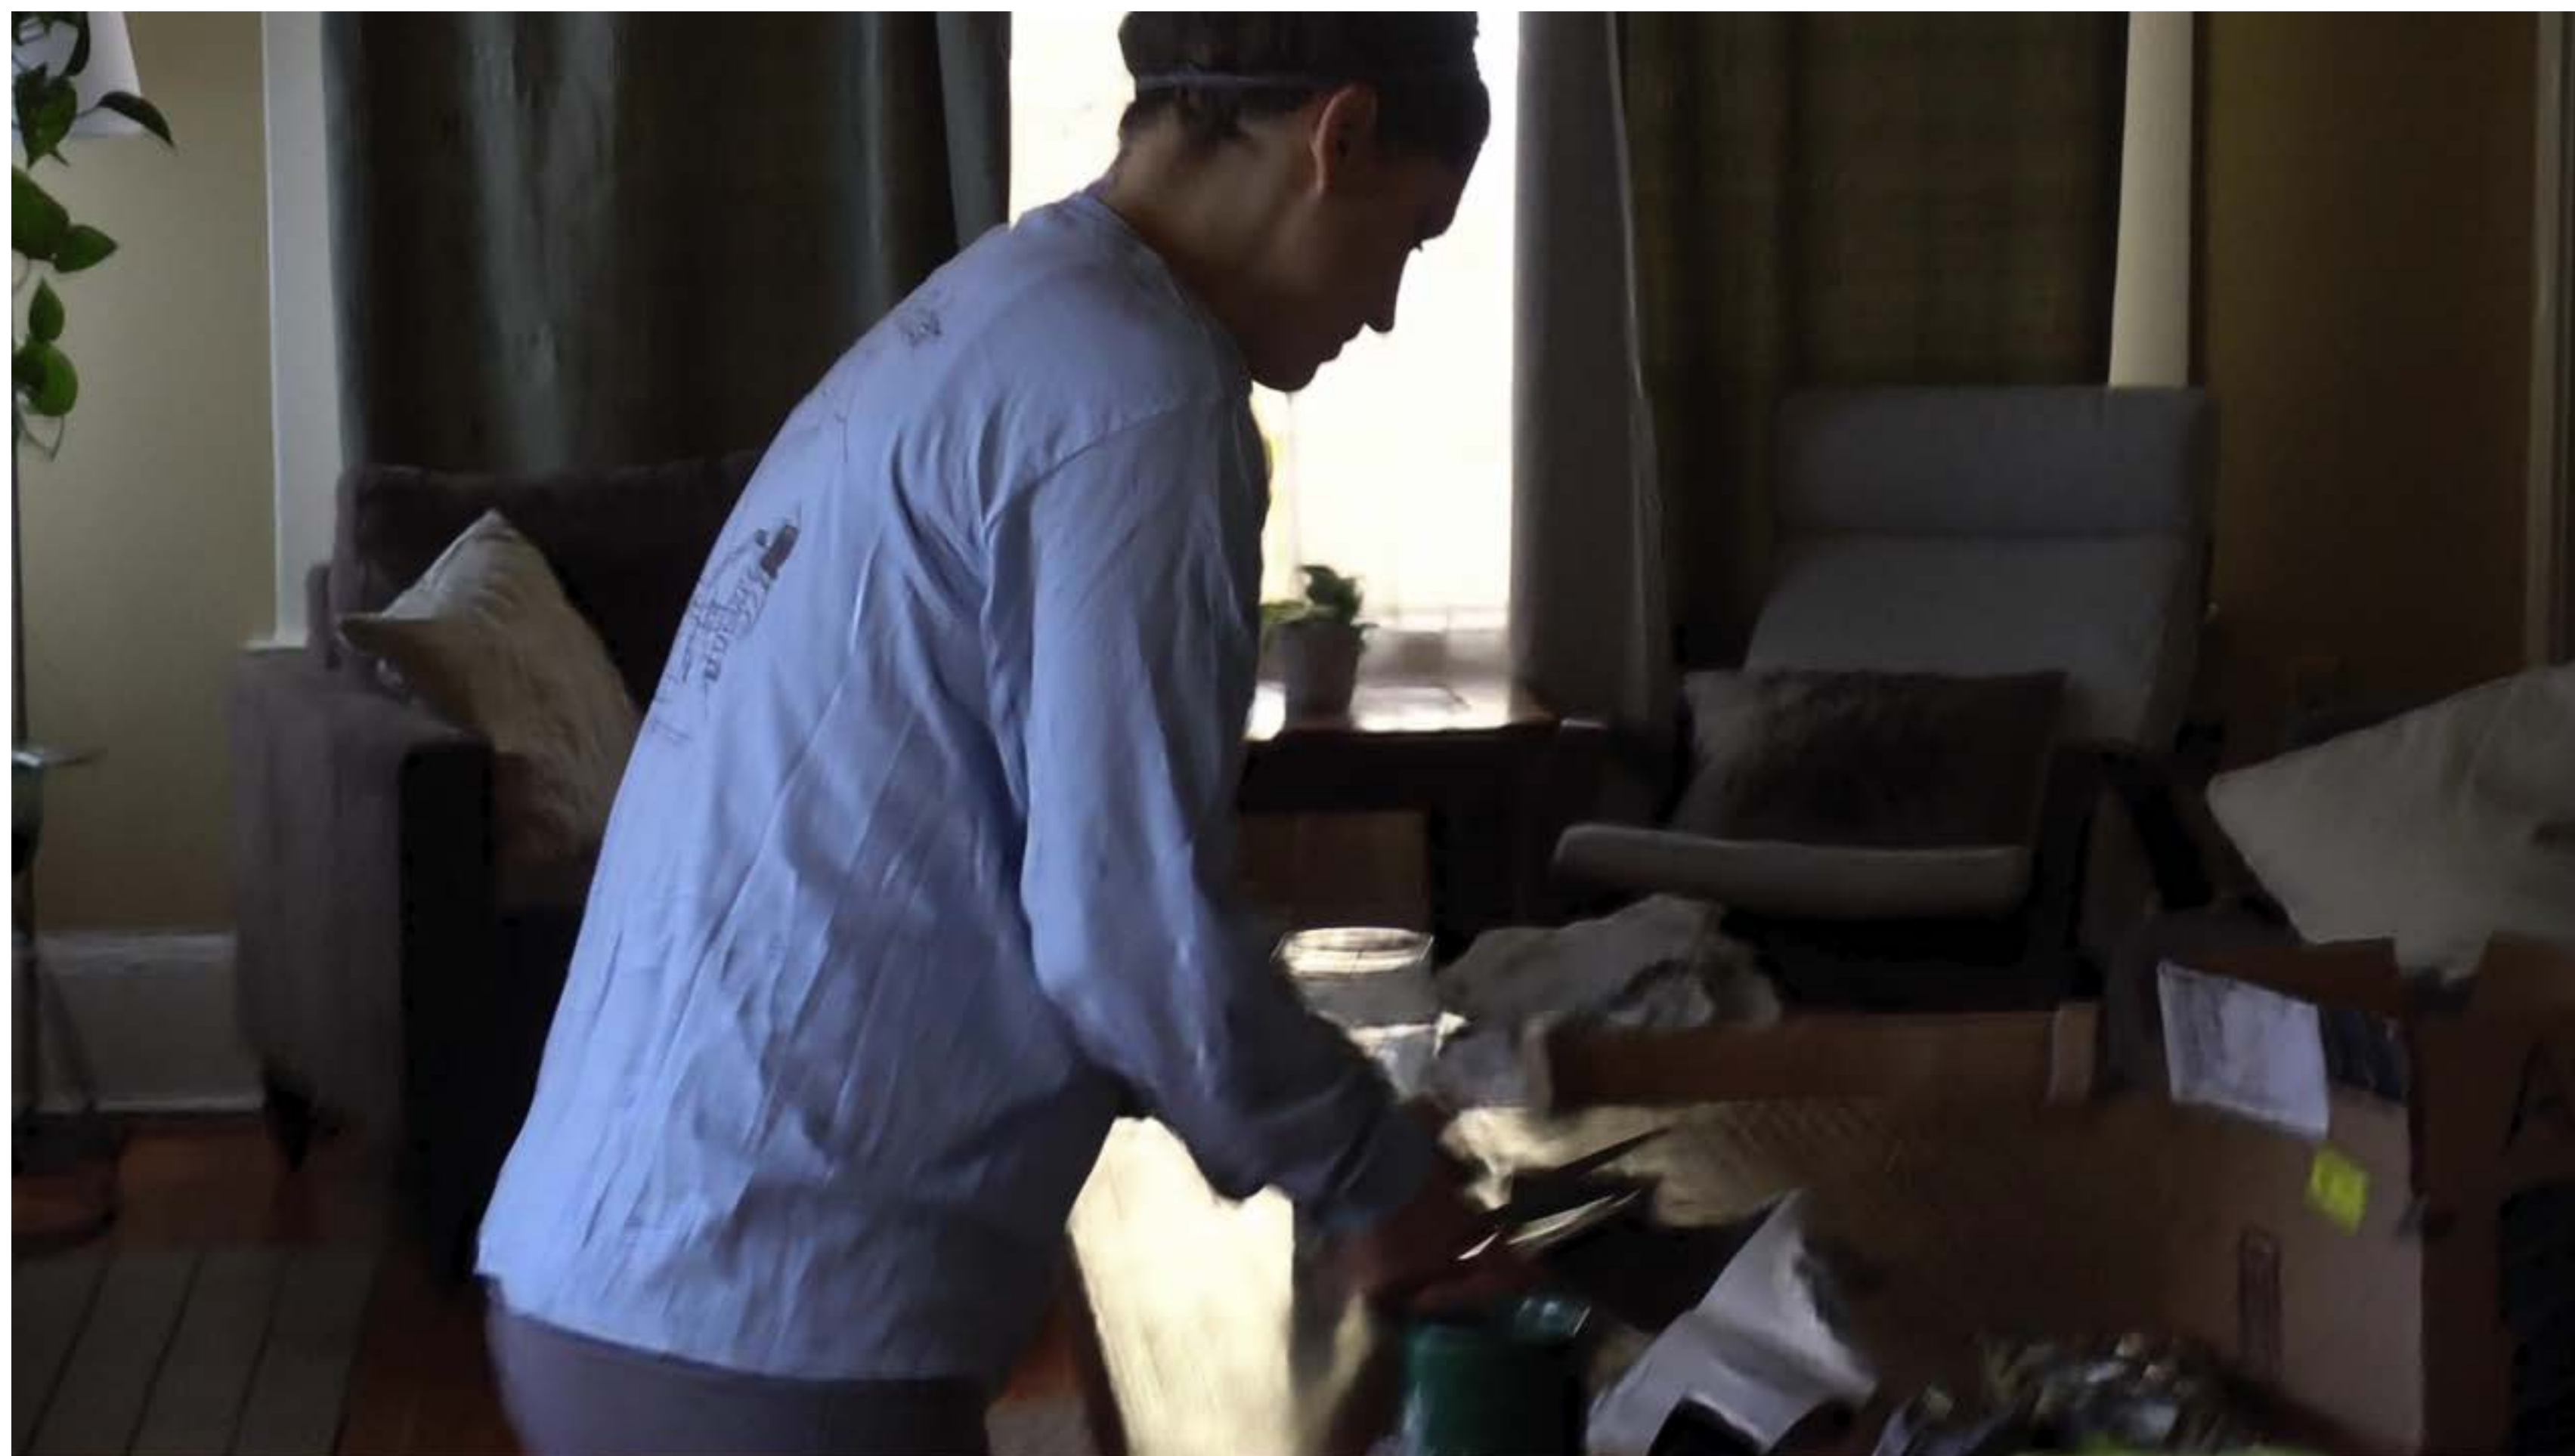

DBN+Homog



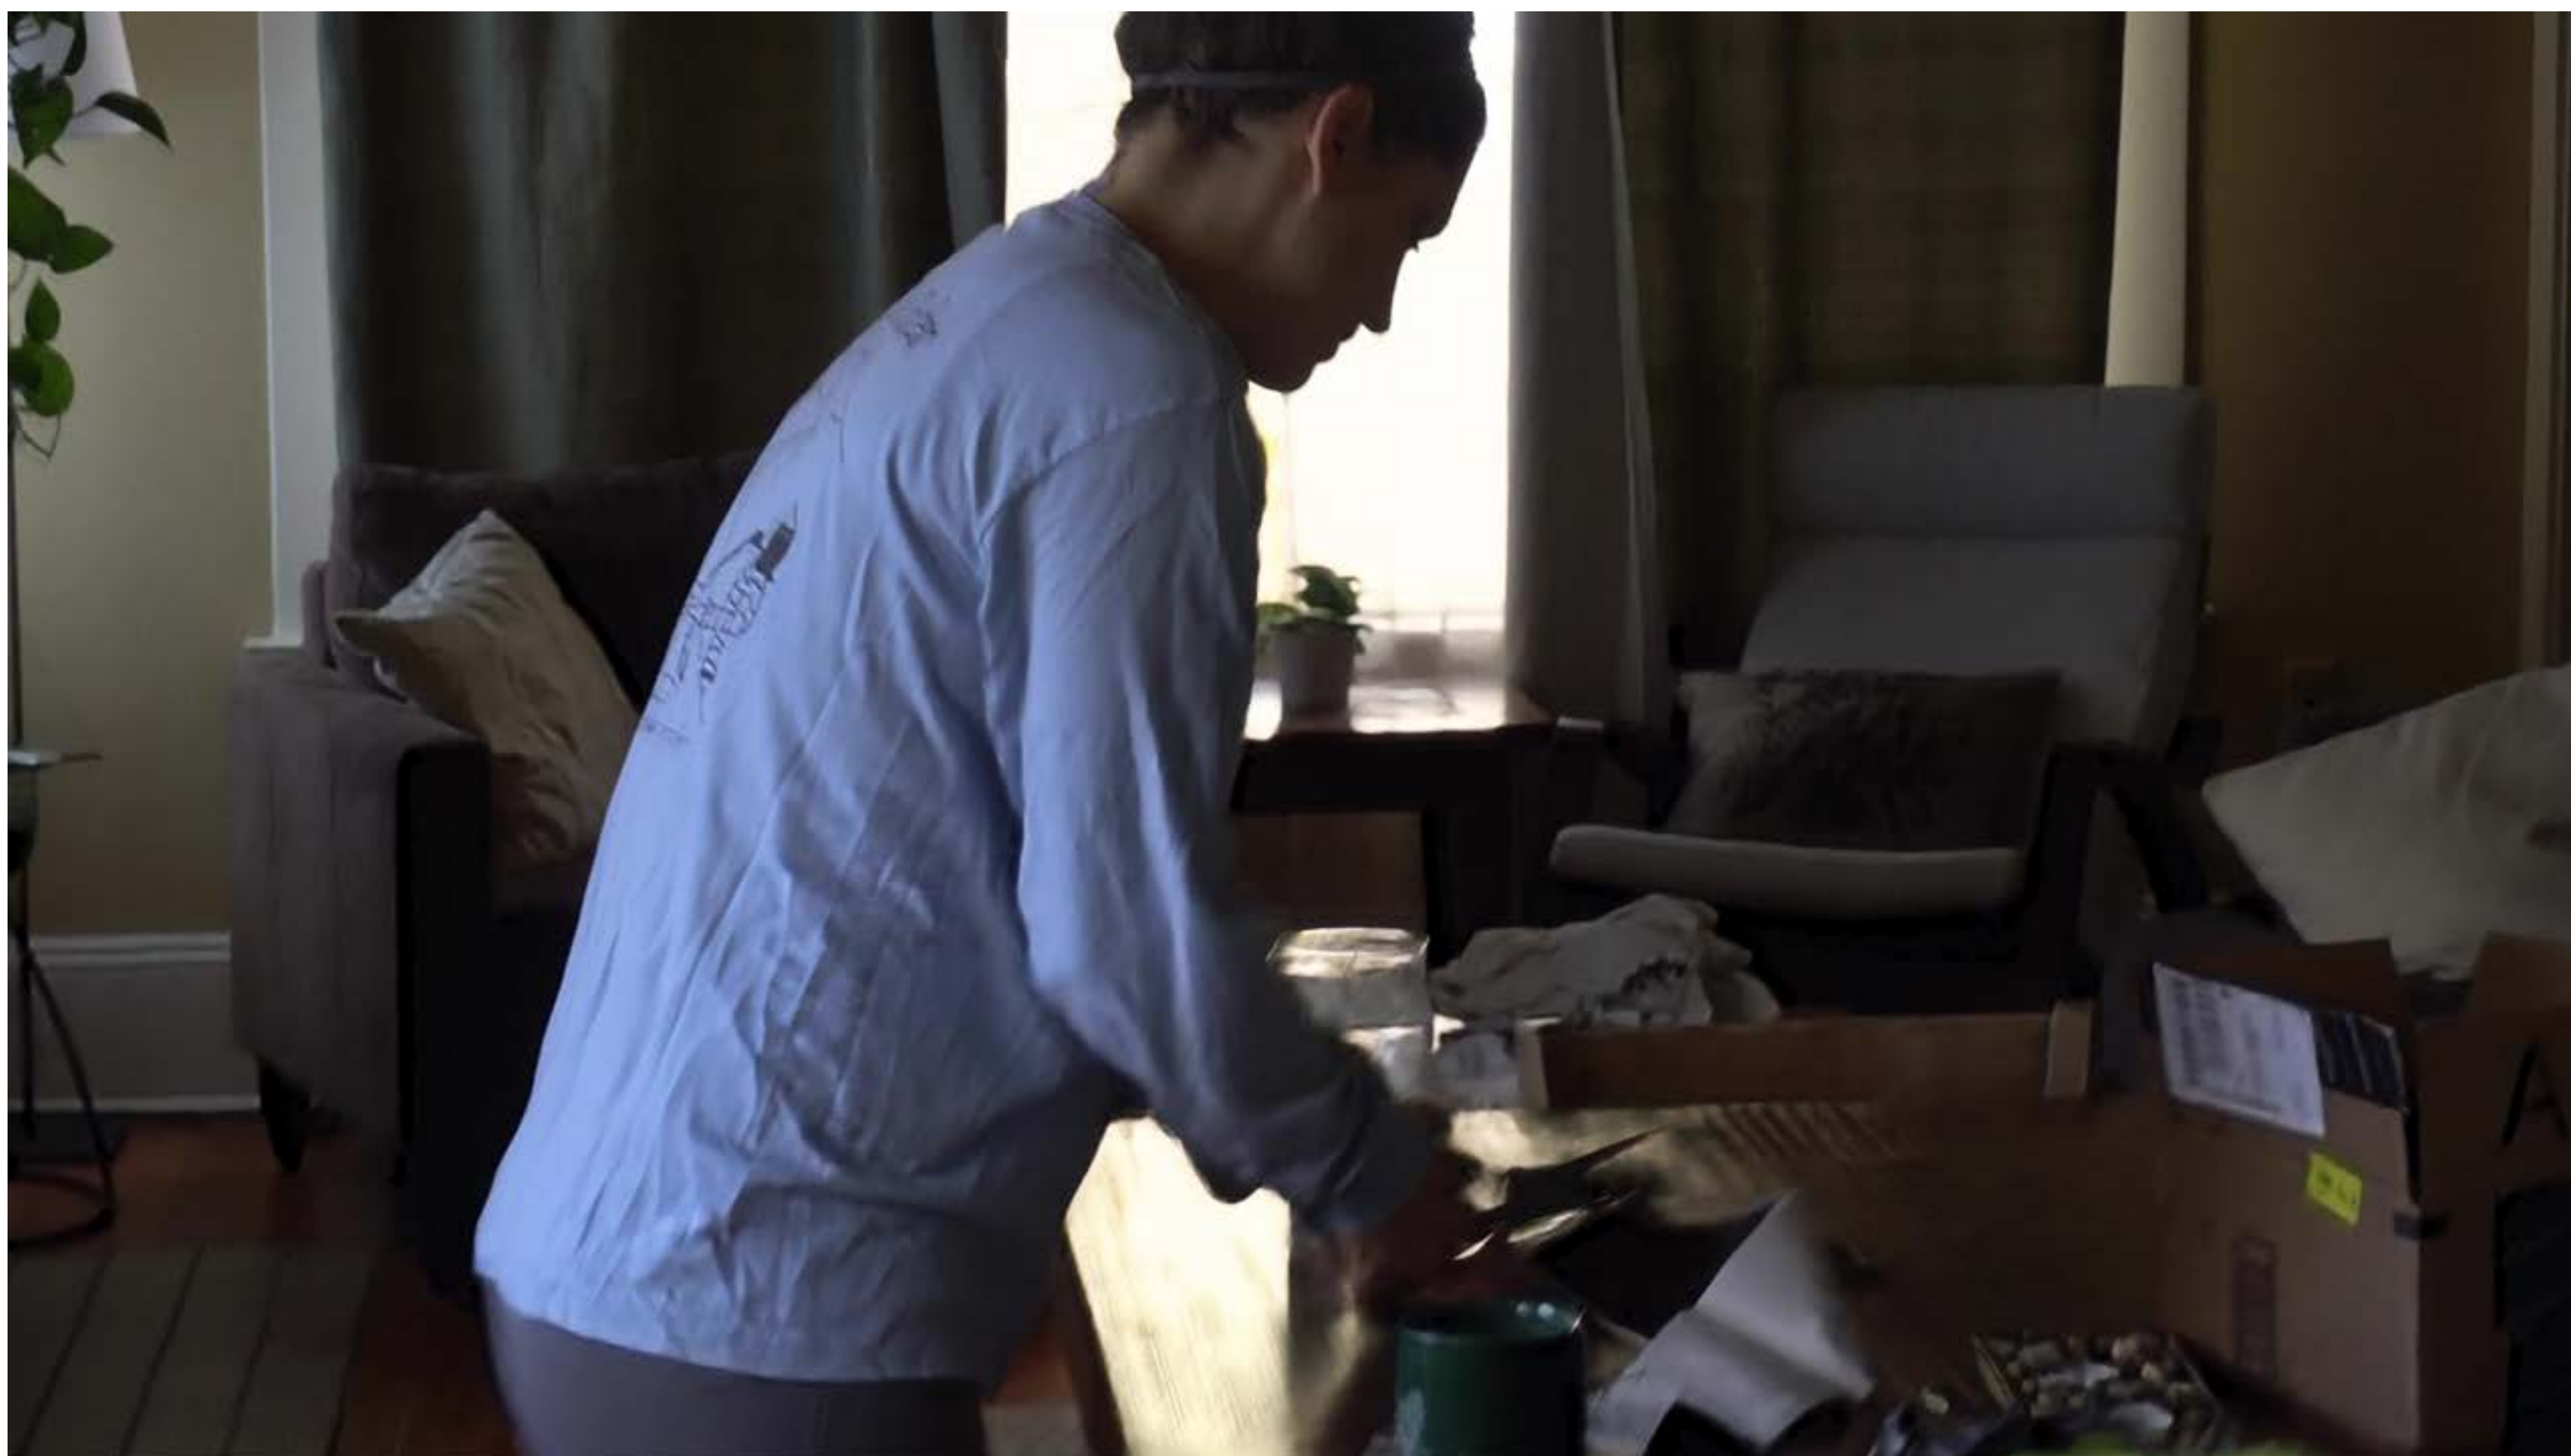

DBN+Flow



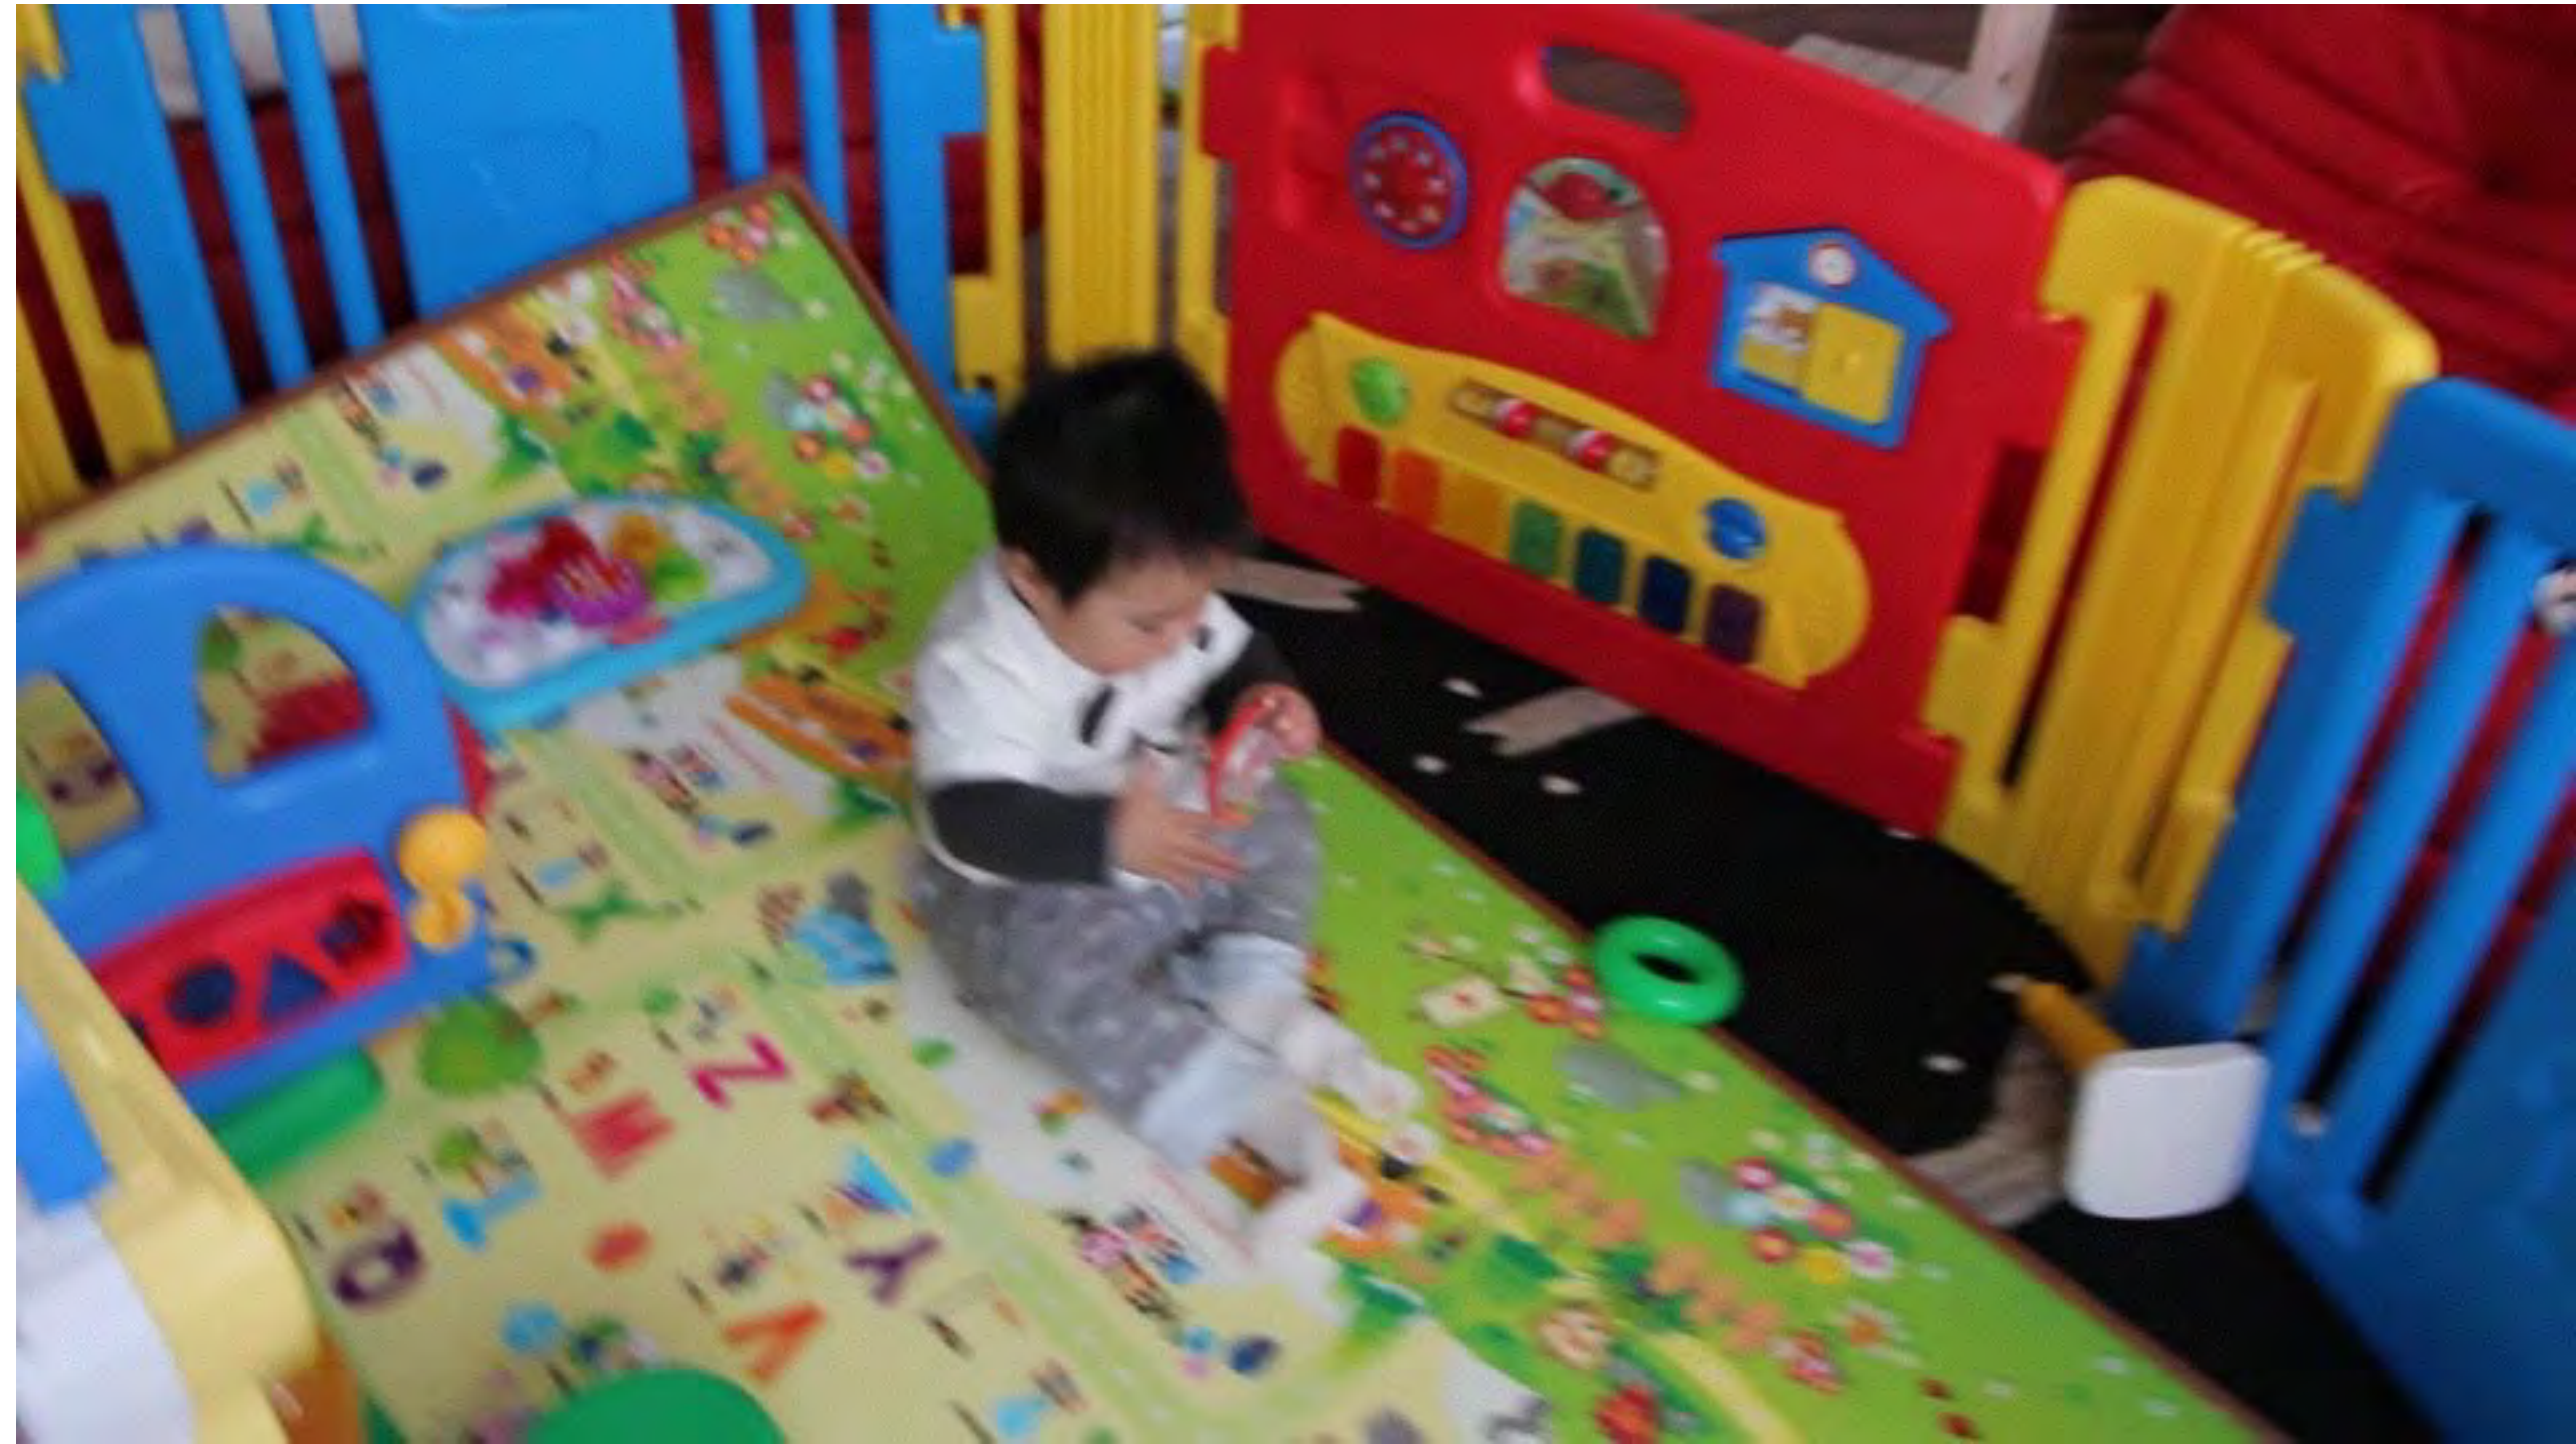

input



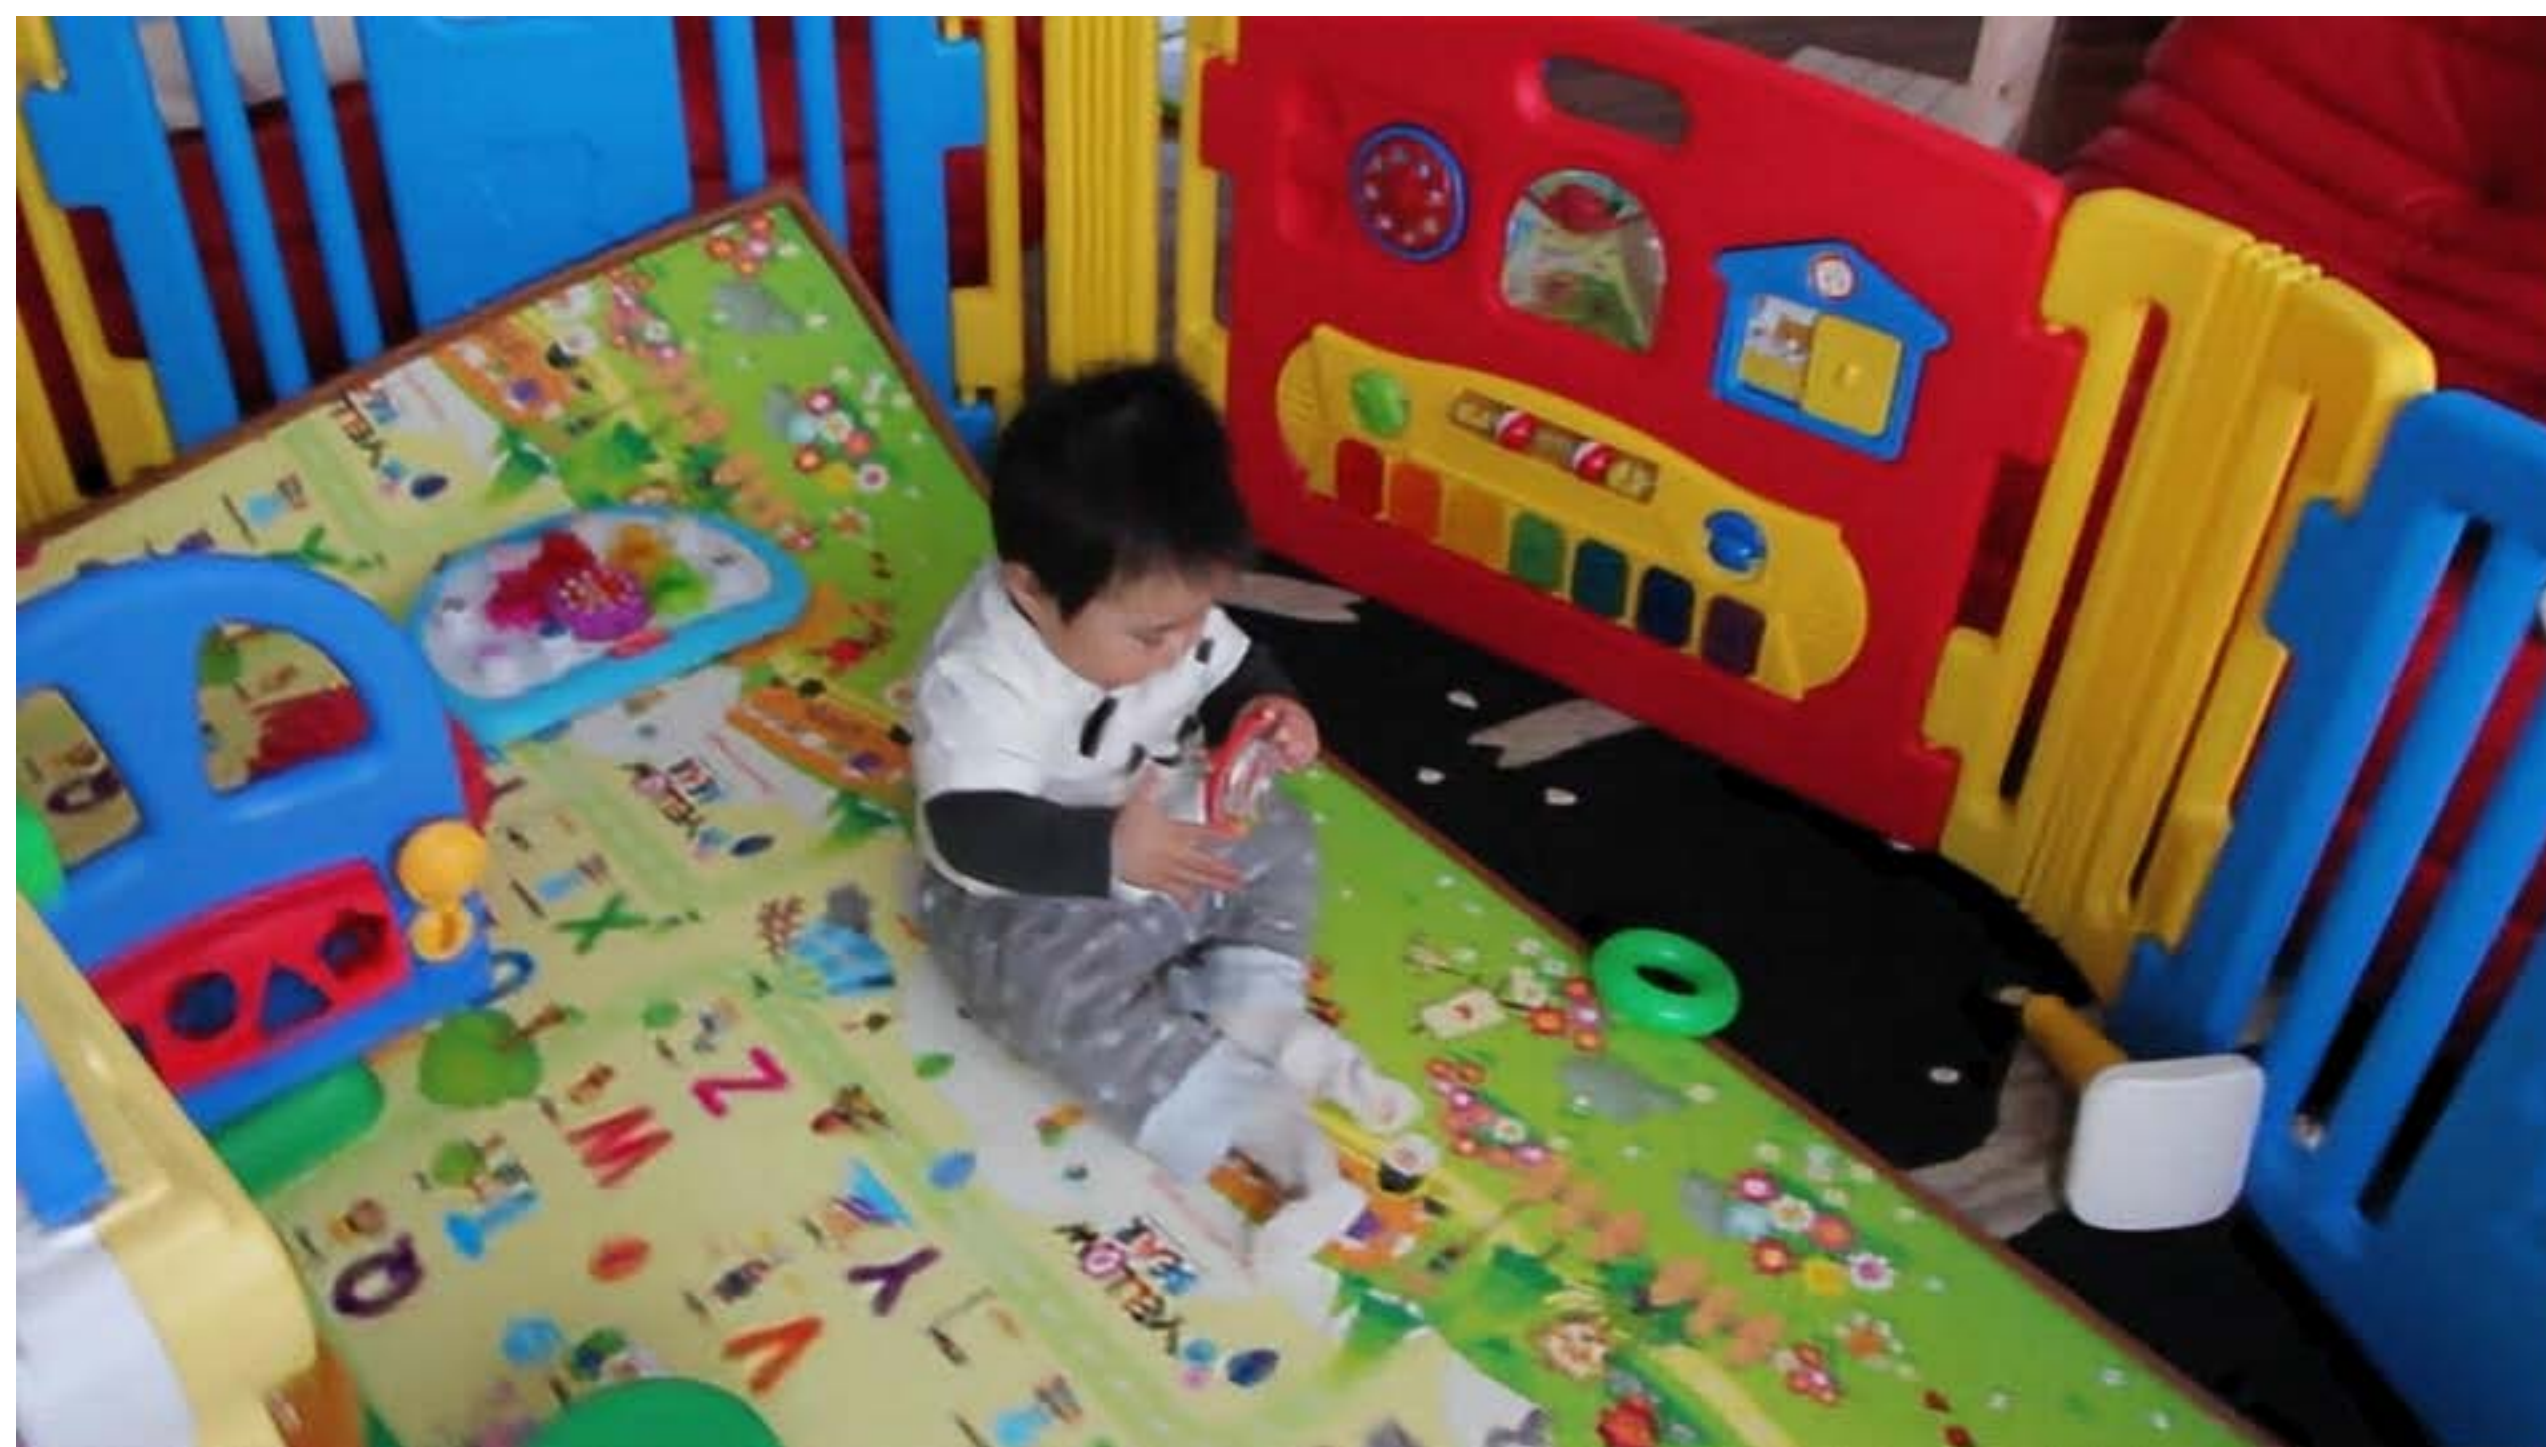

DBN+Noalign



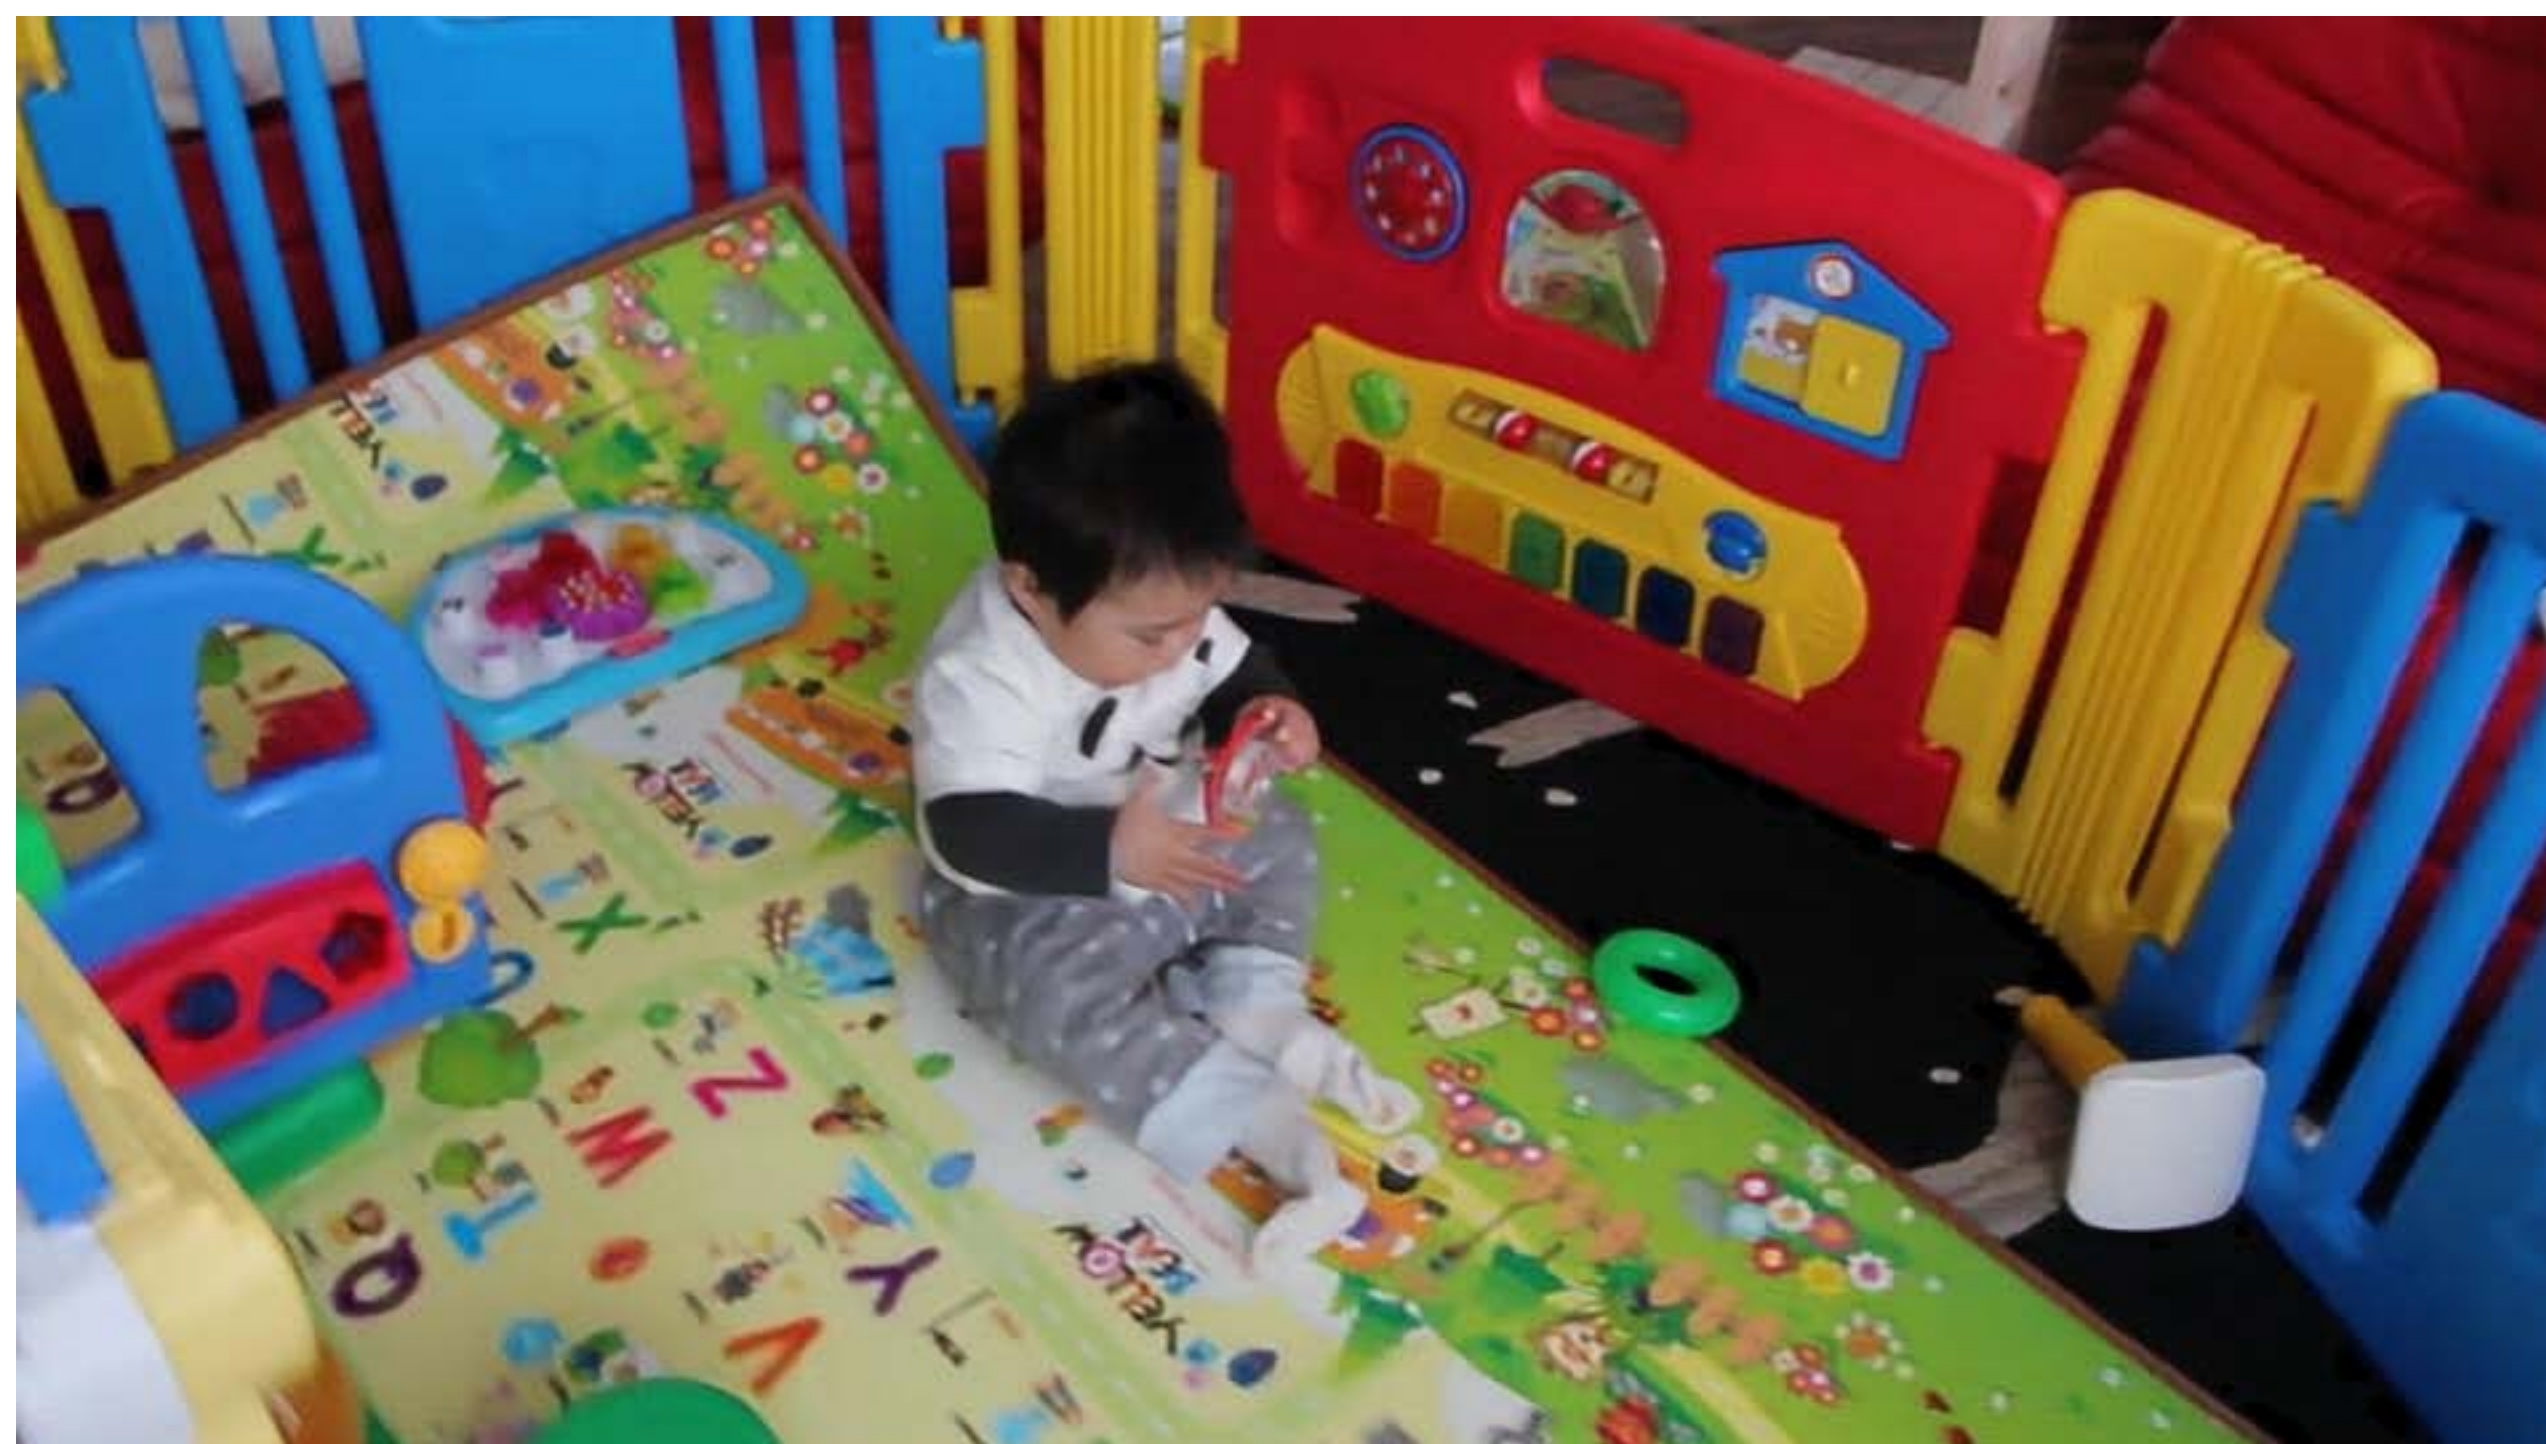

DBN+Homog



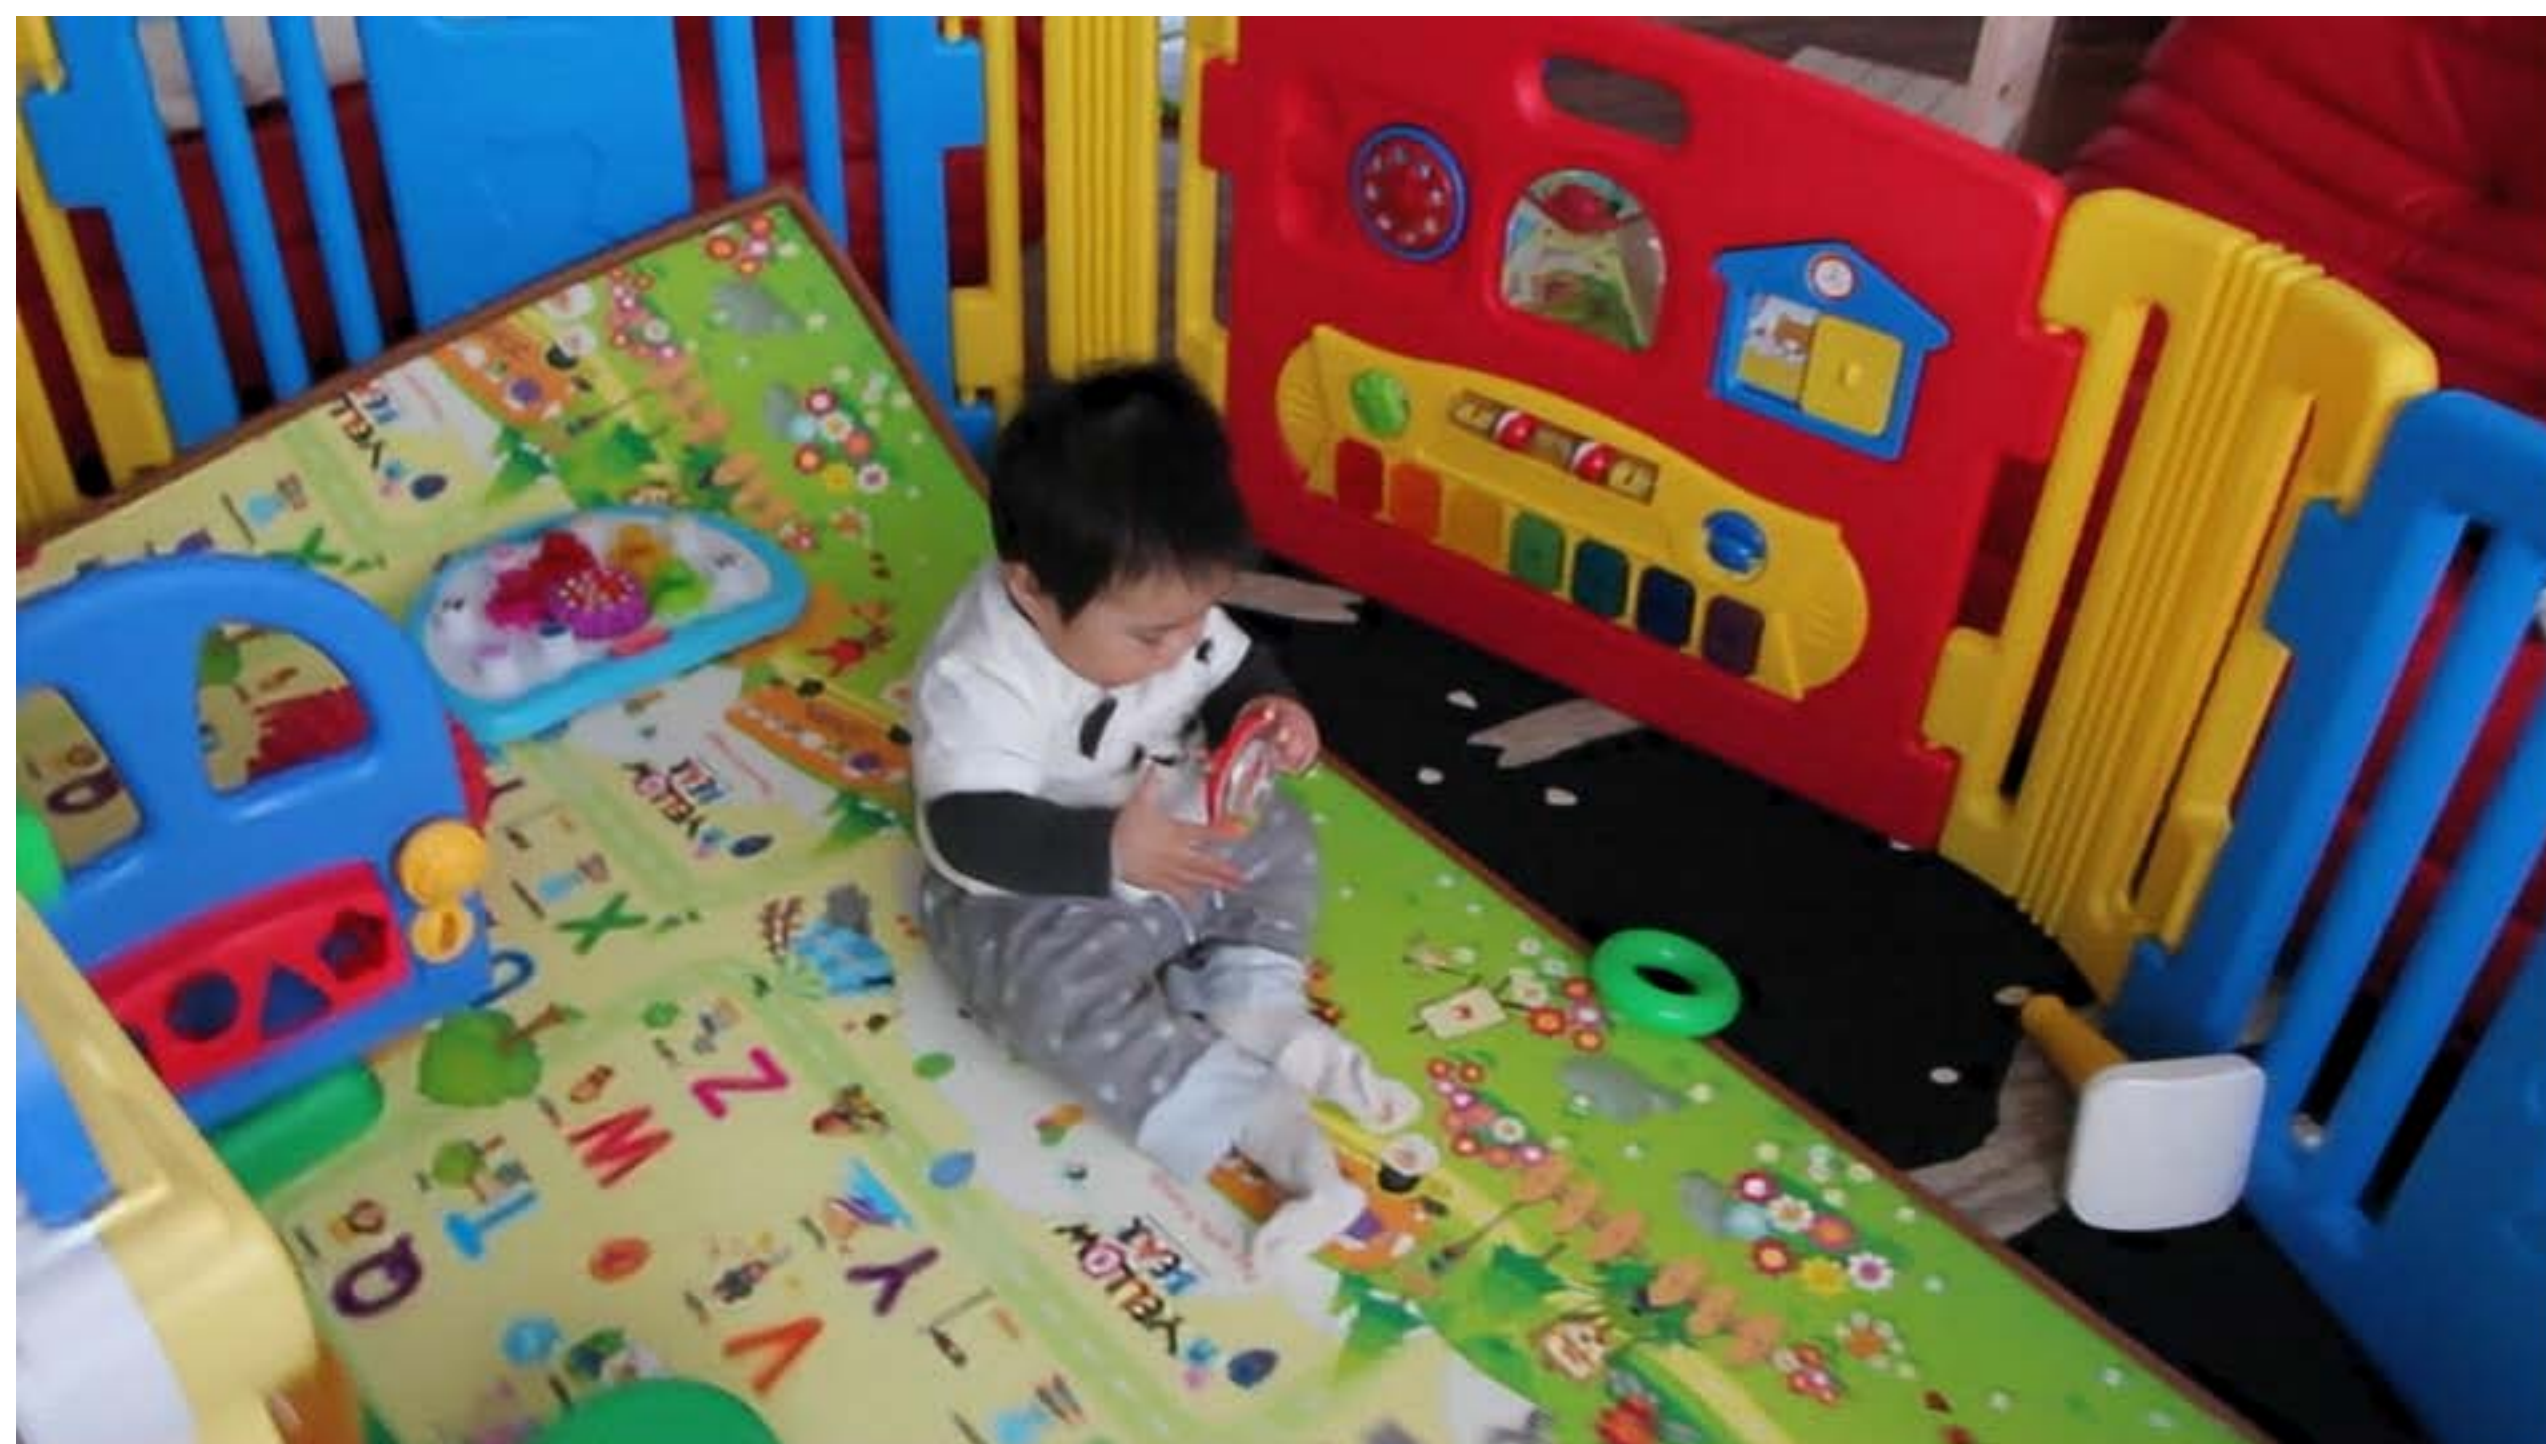

DBN+Flow



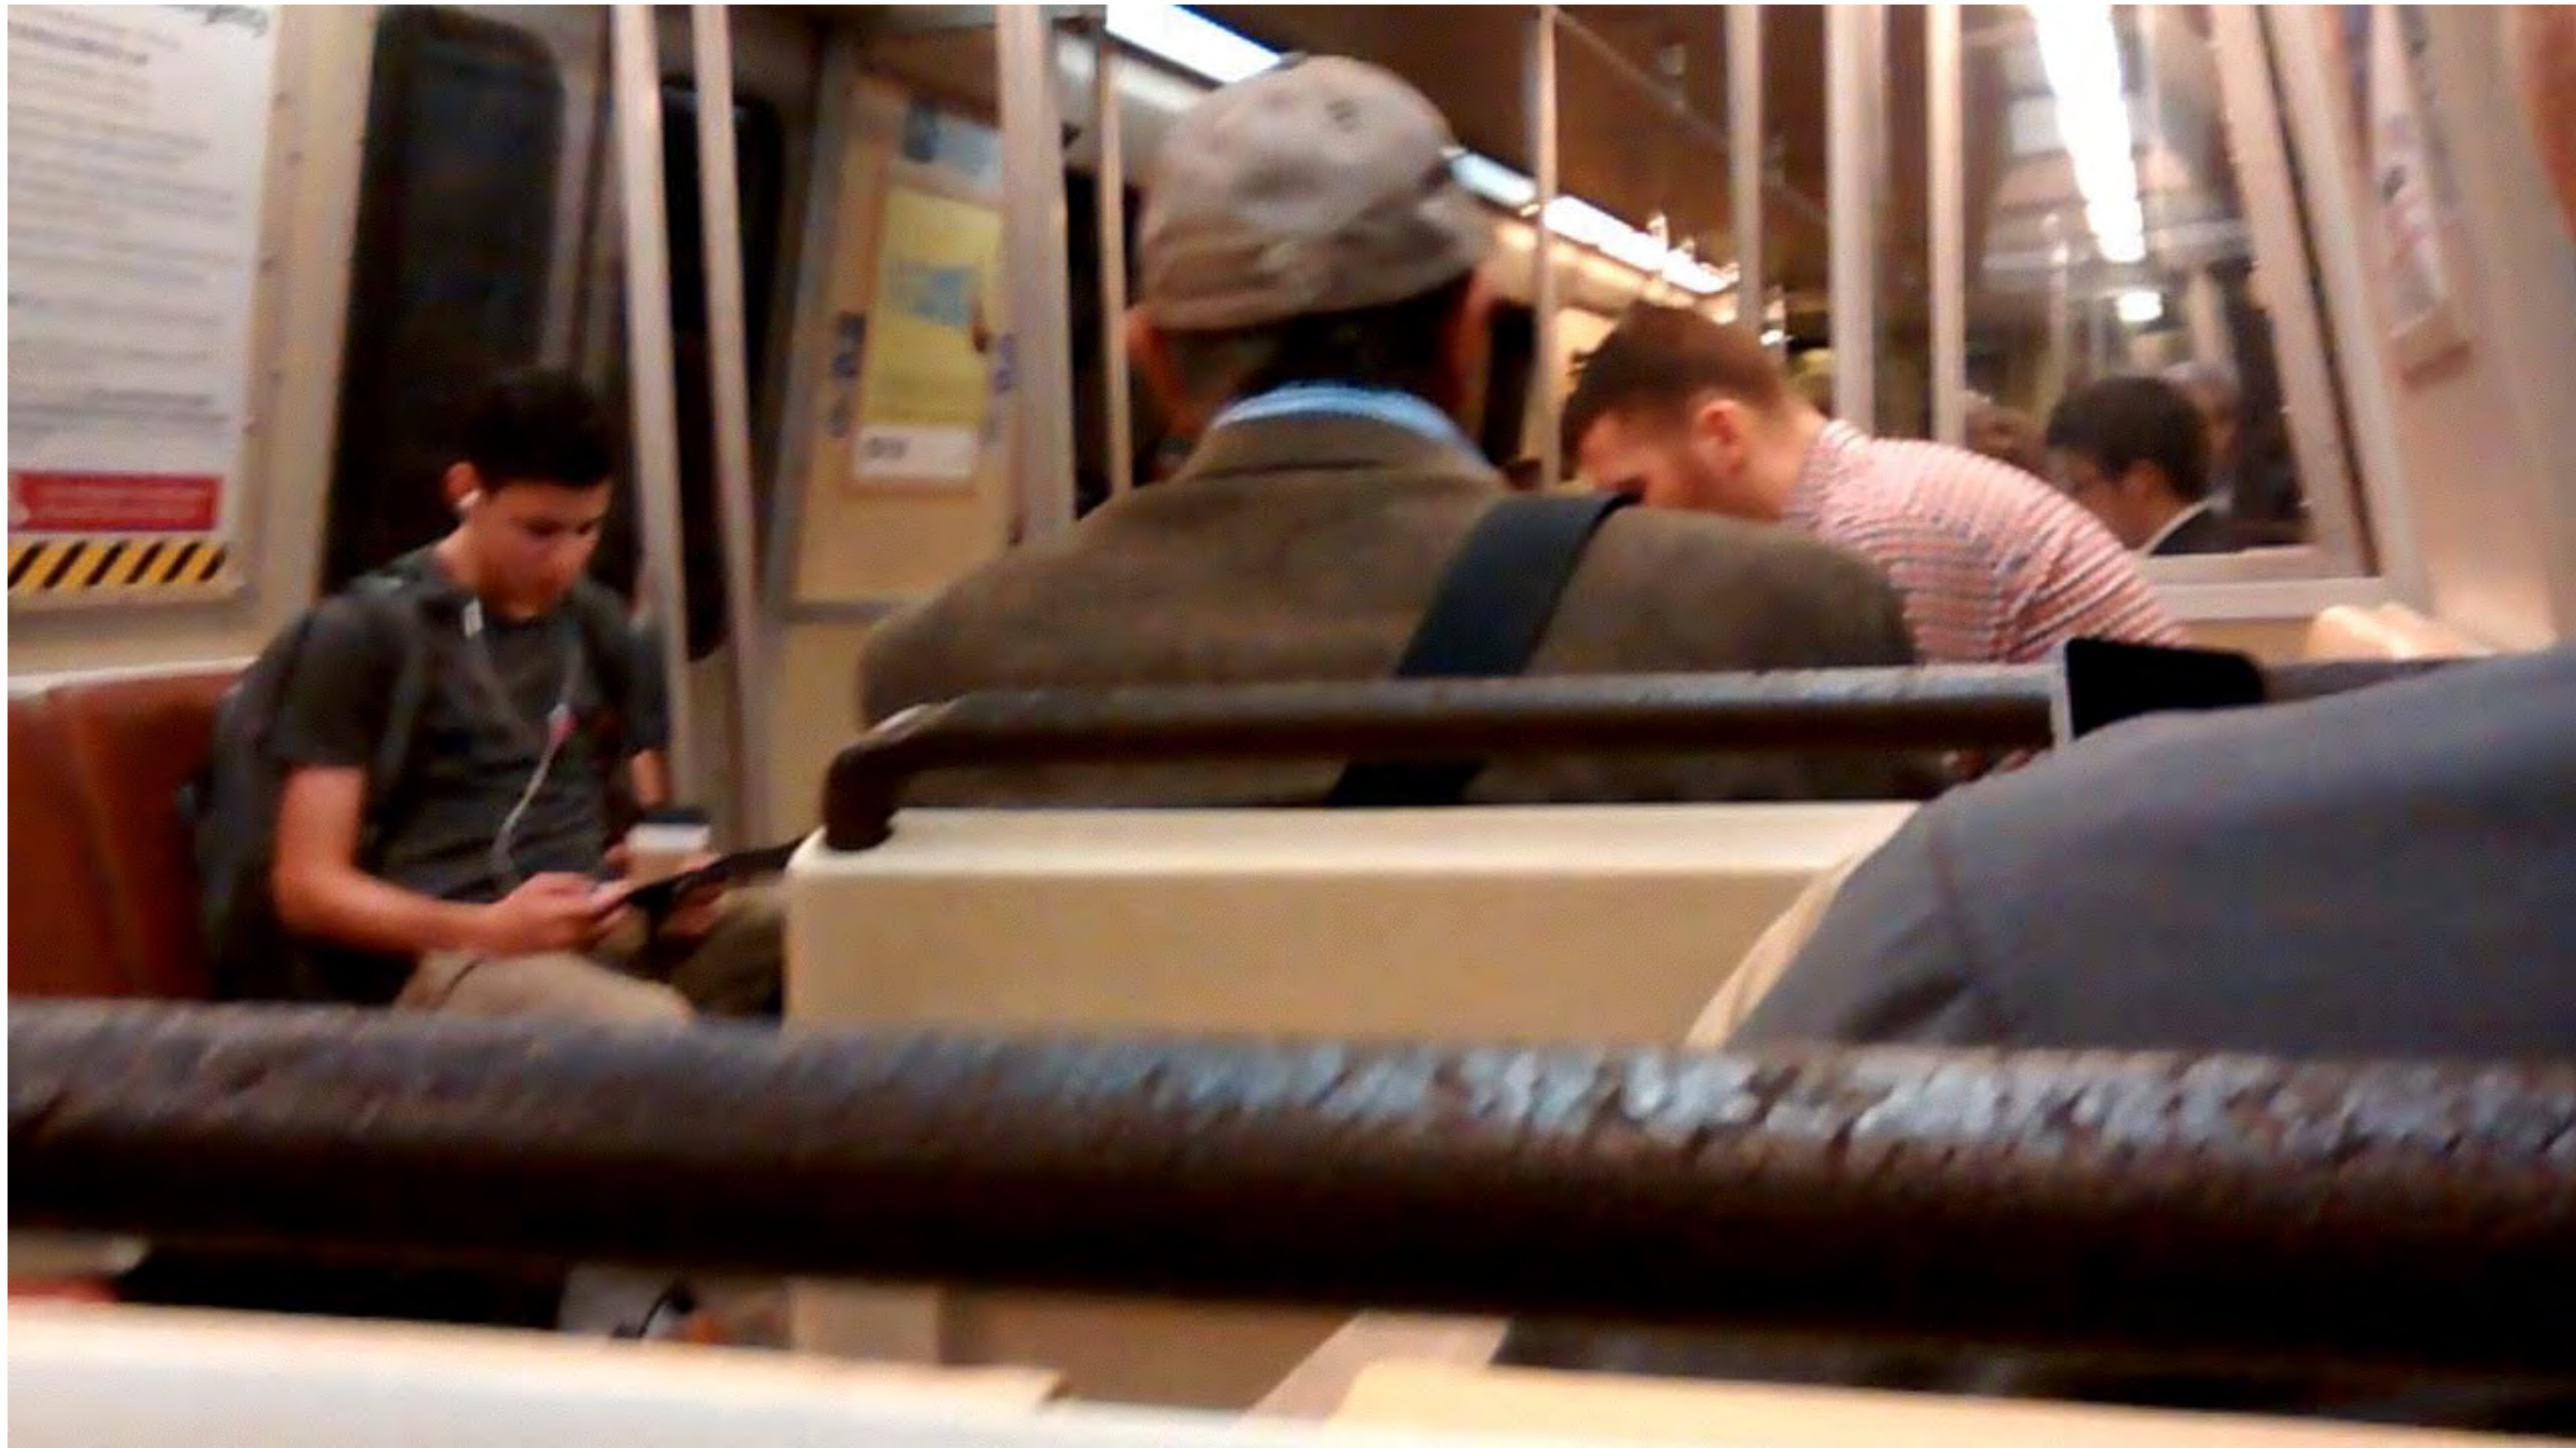

input



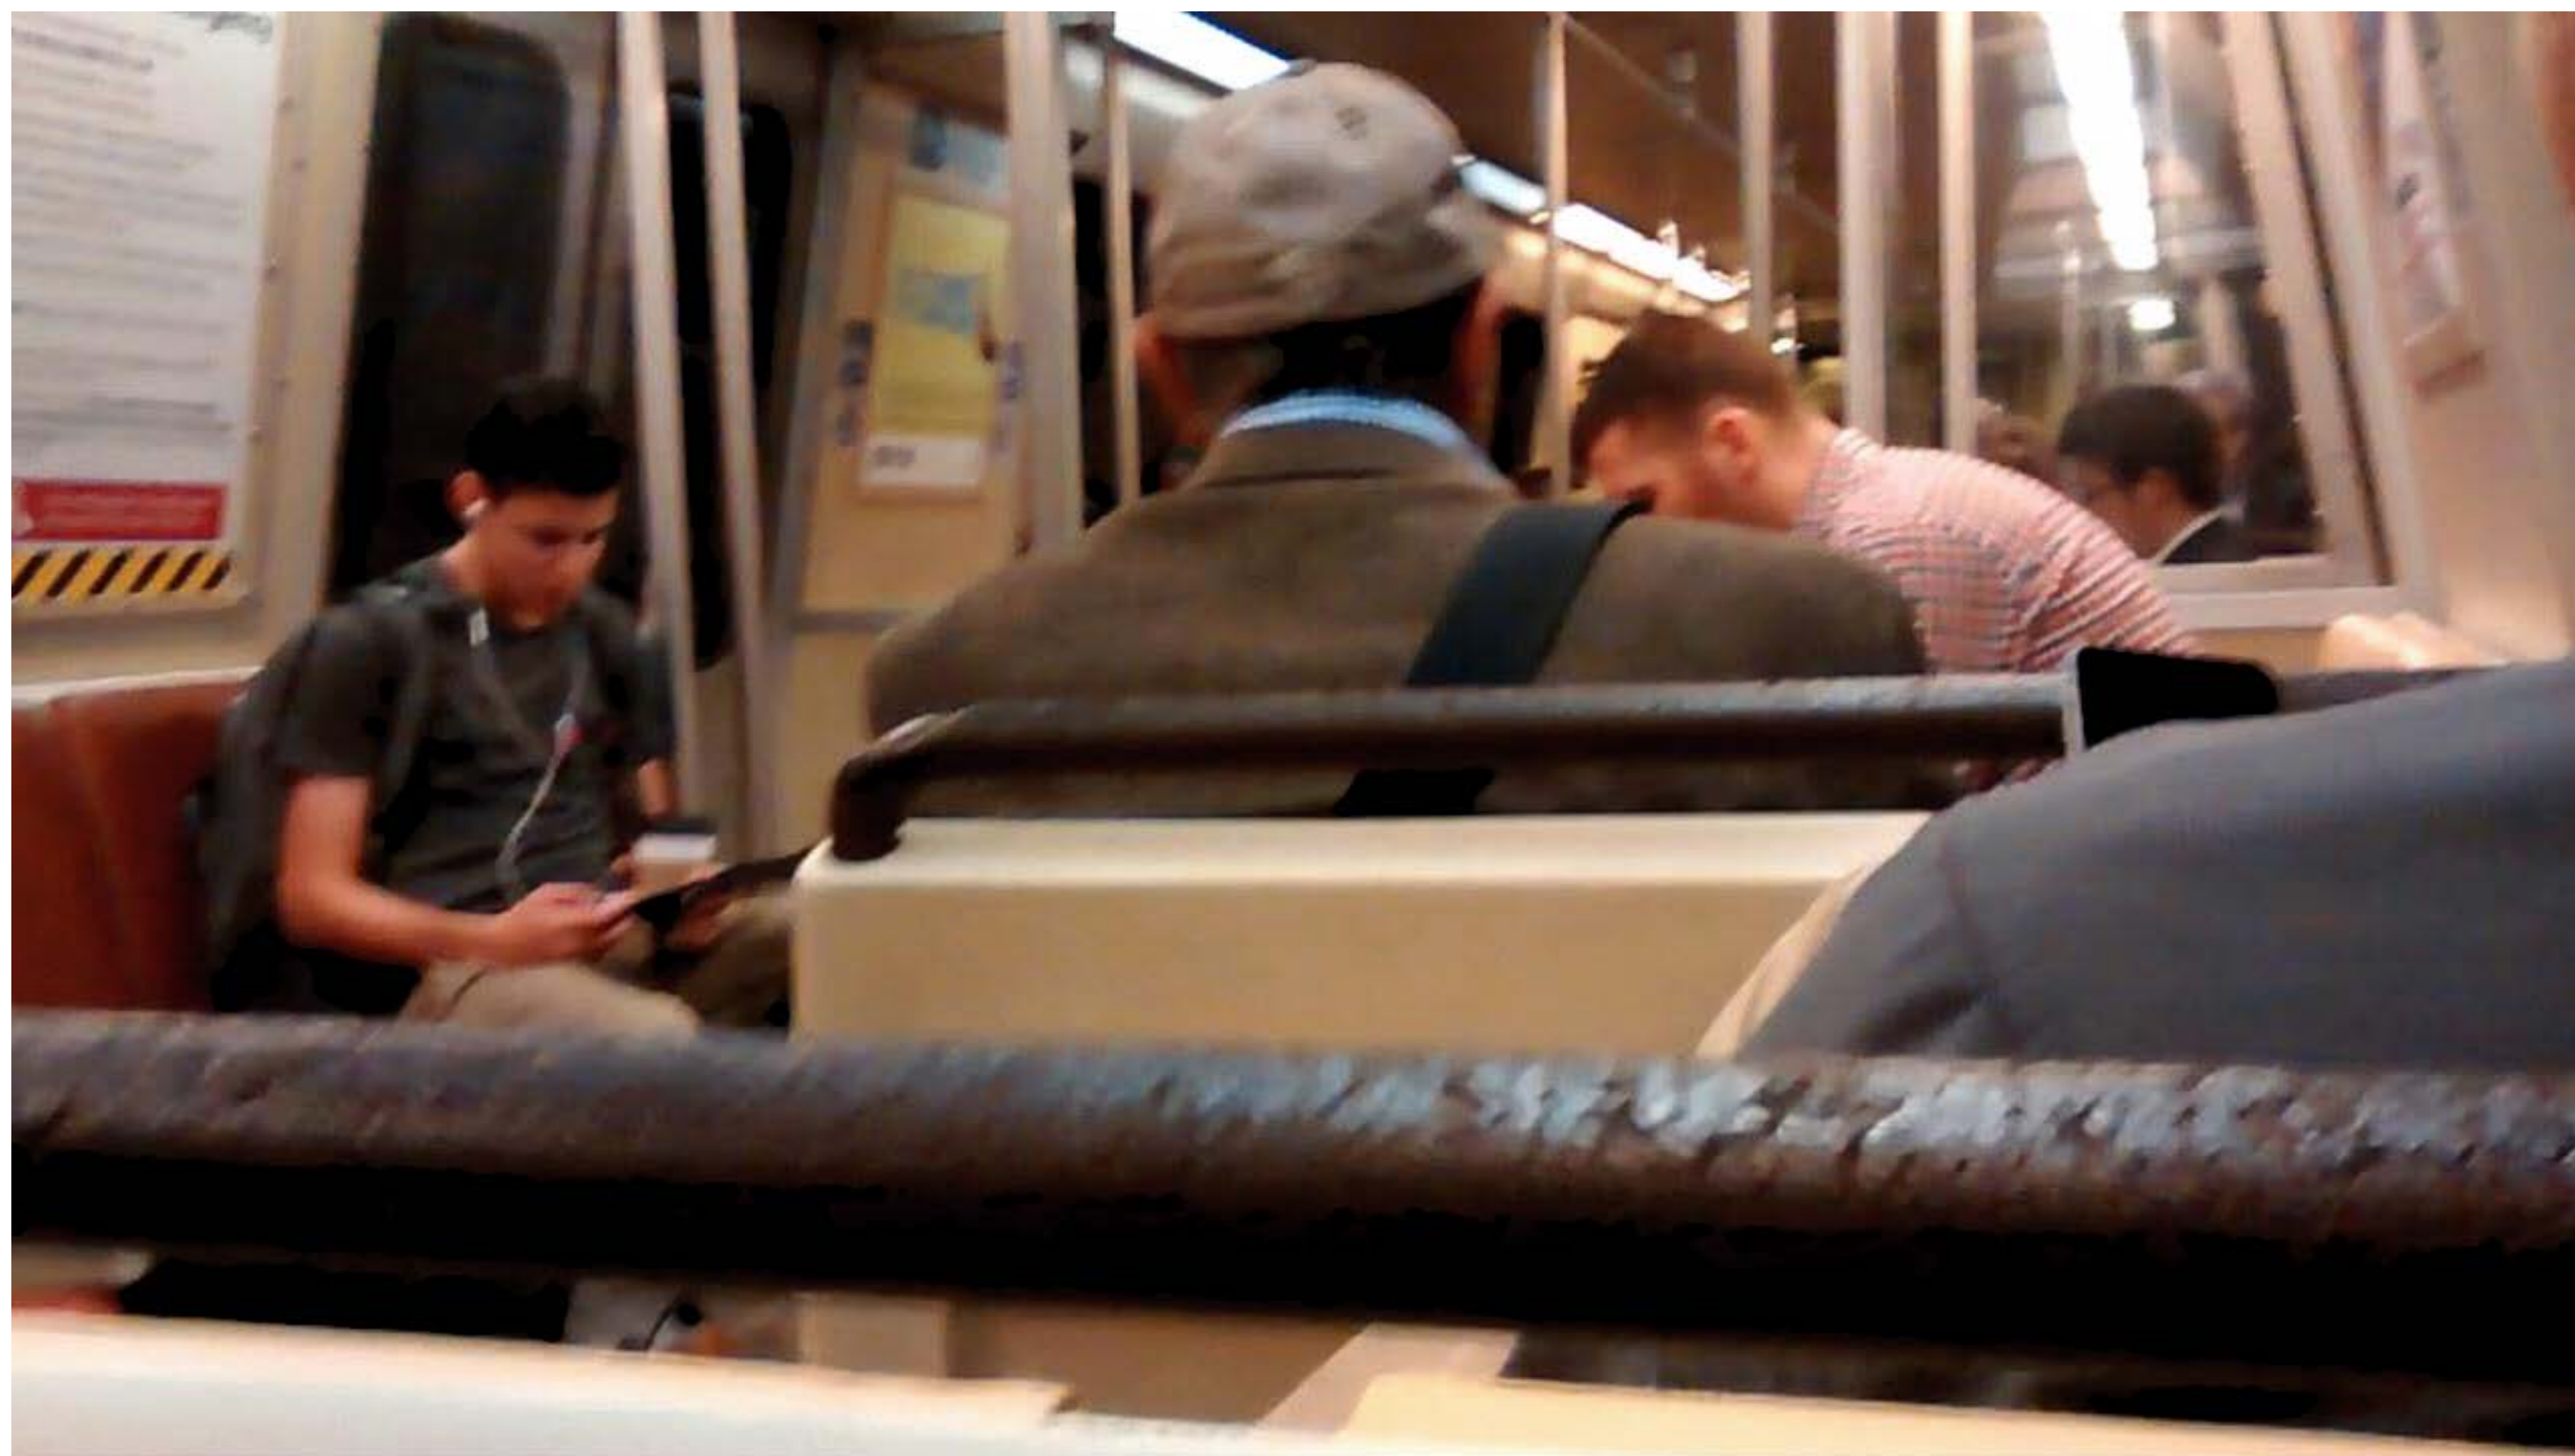

DBN+Noalign



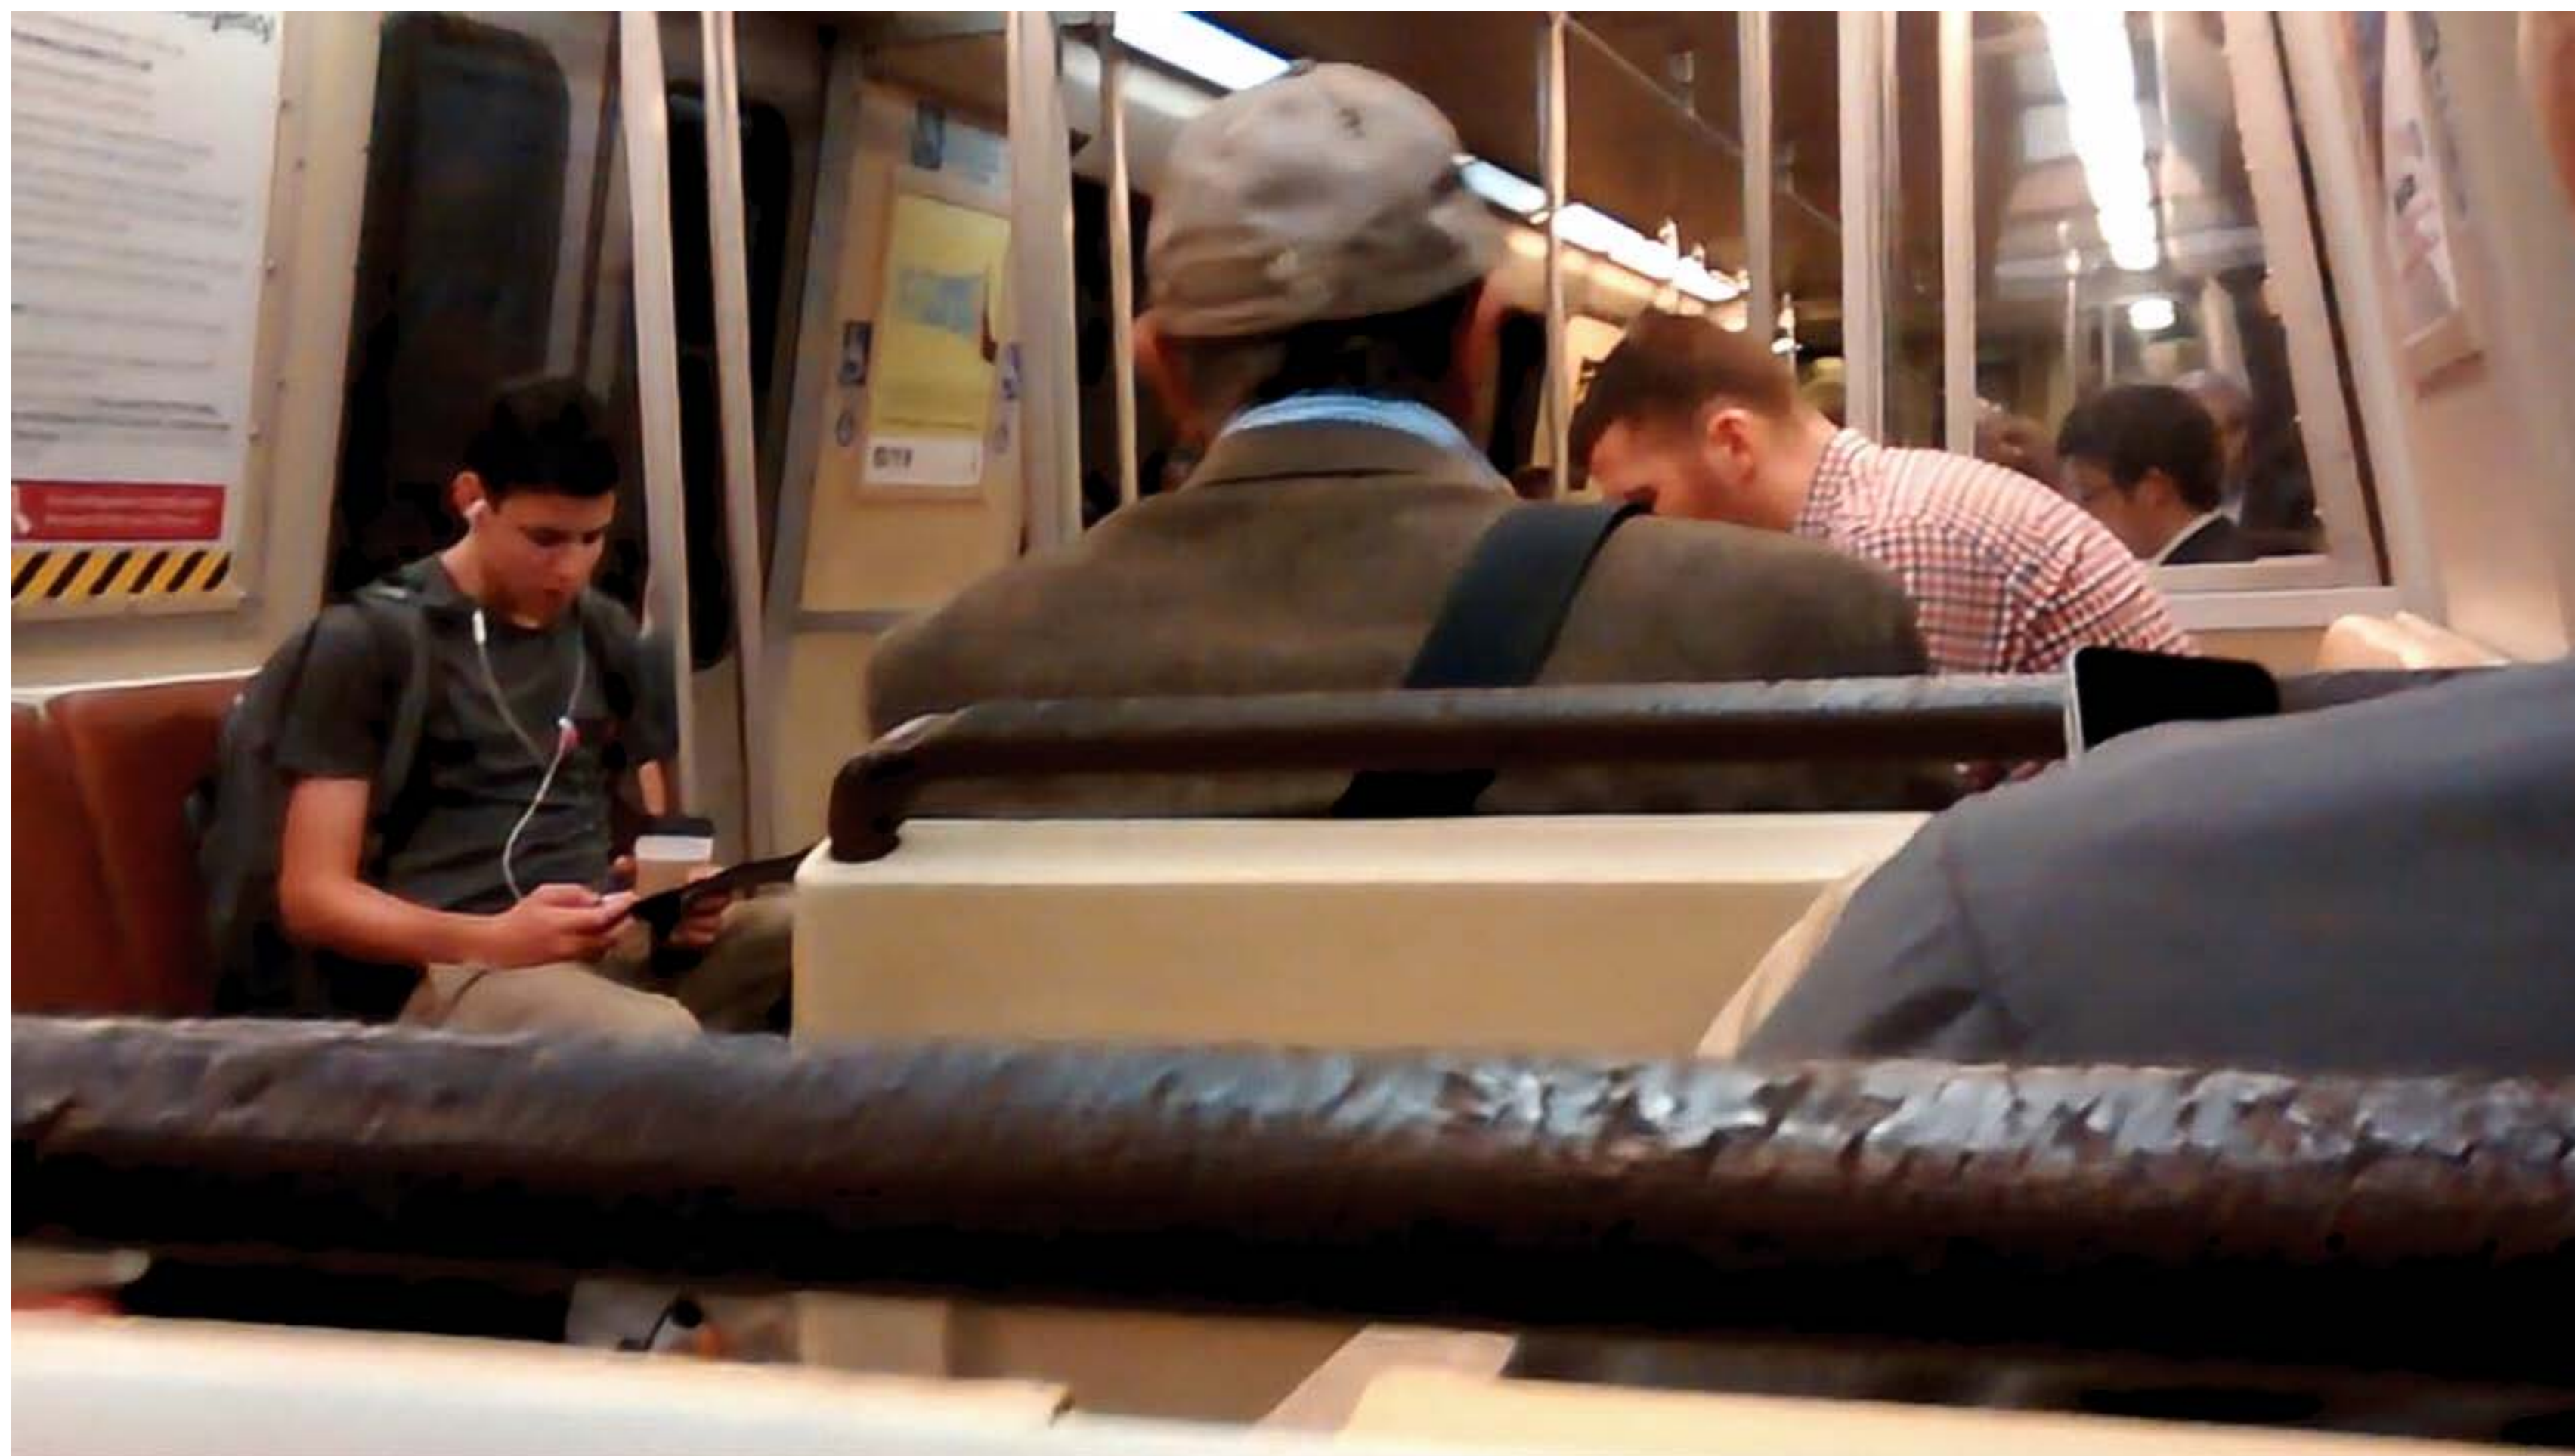

DBN+Homog



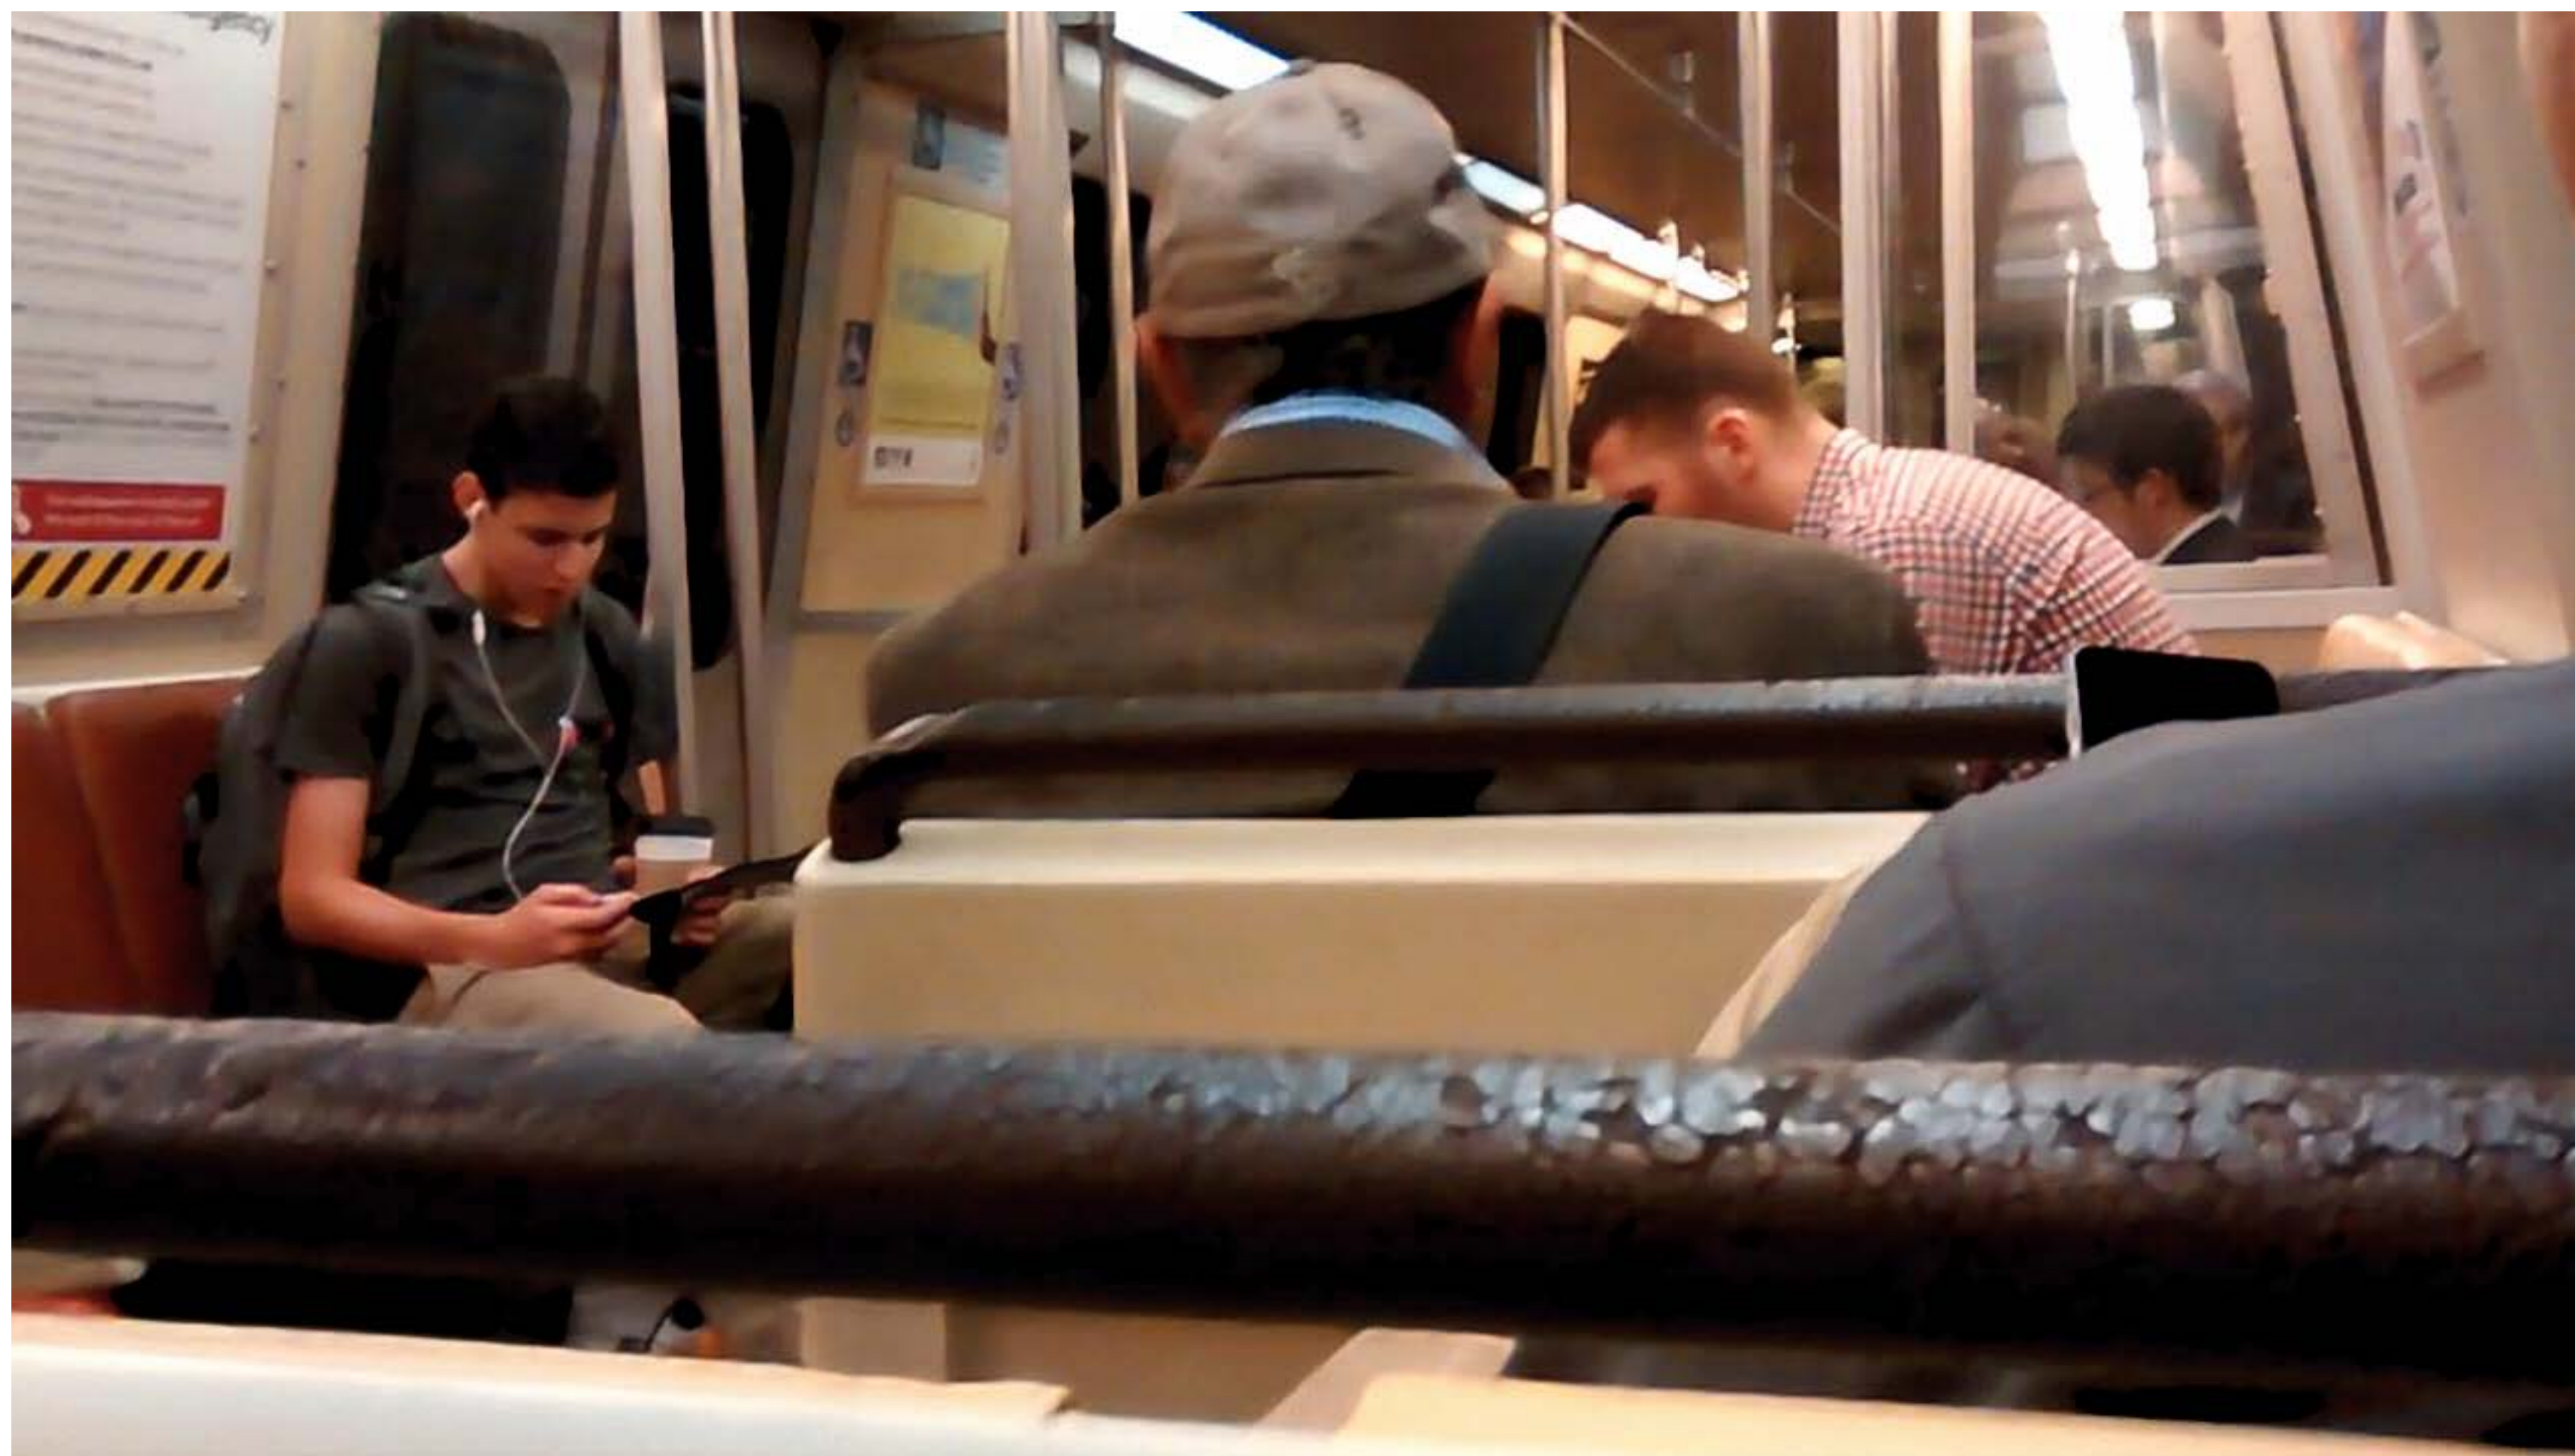

DBN+Flow



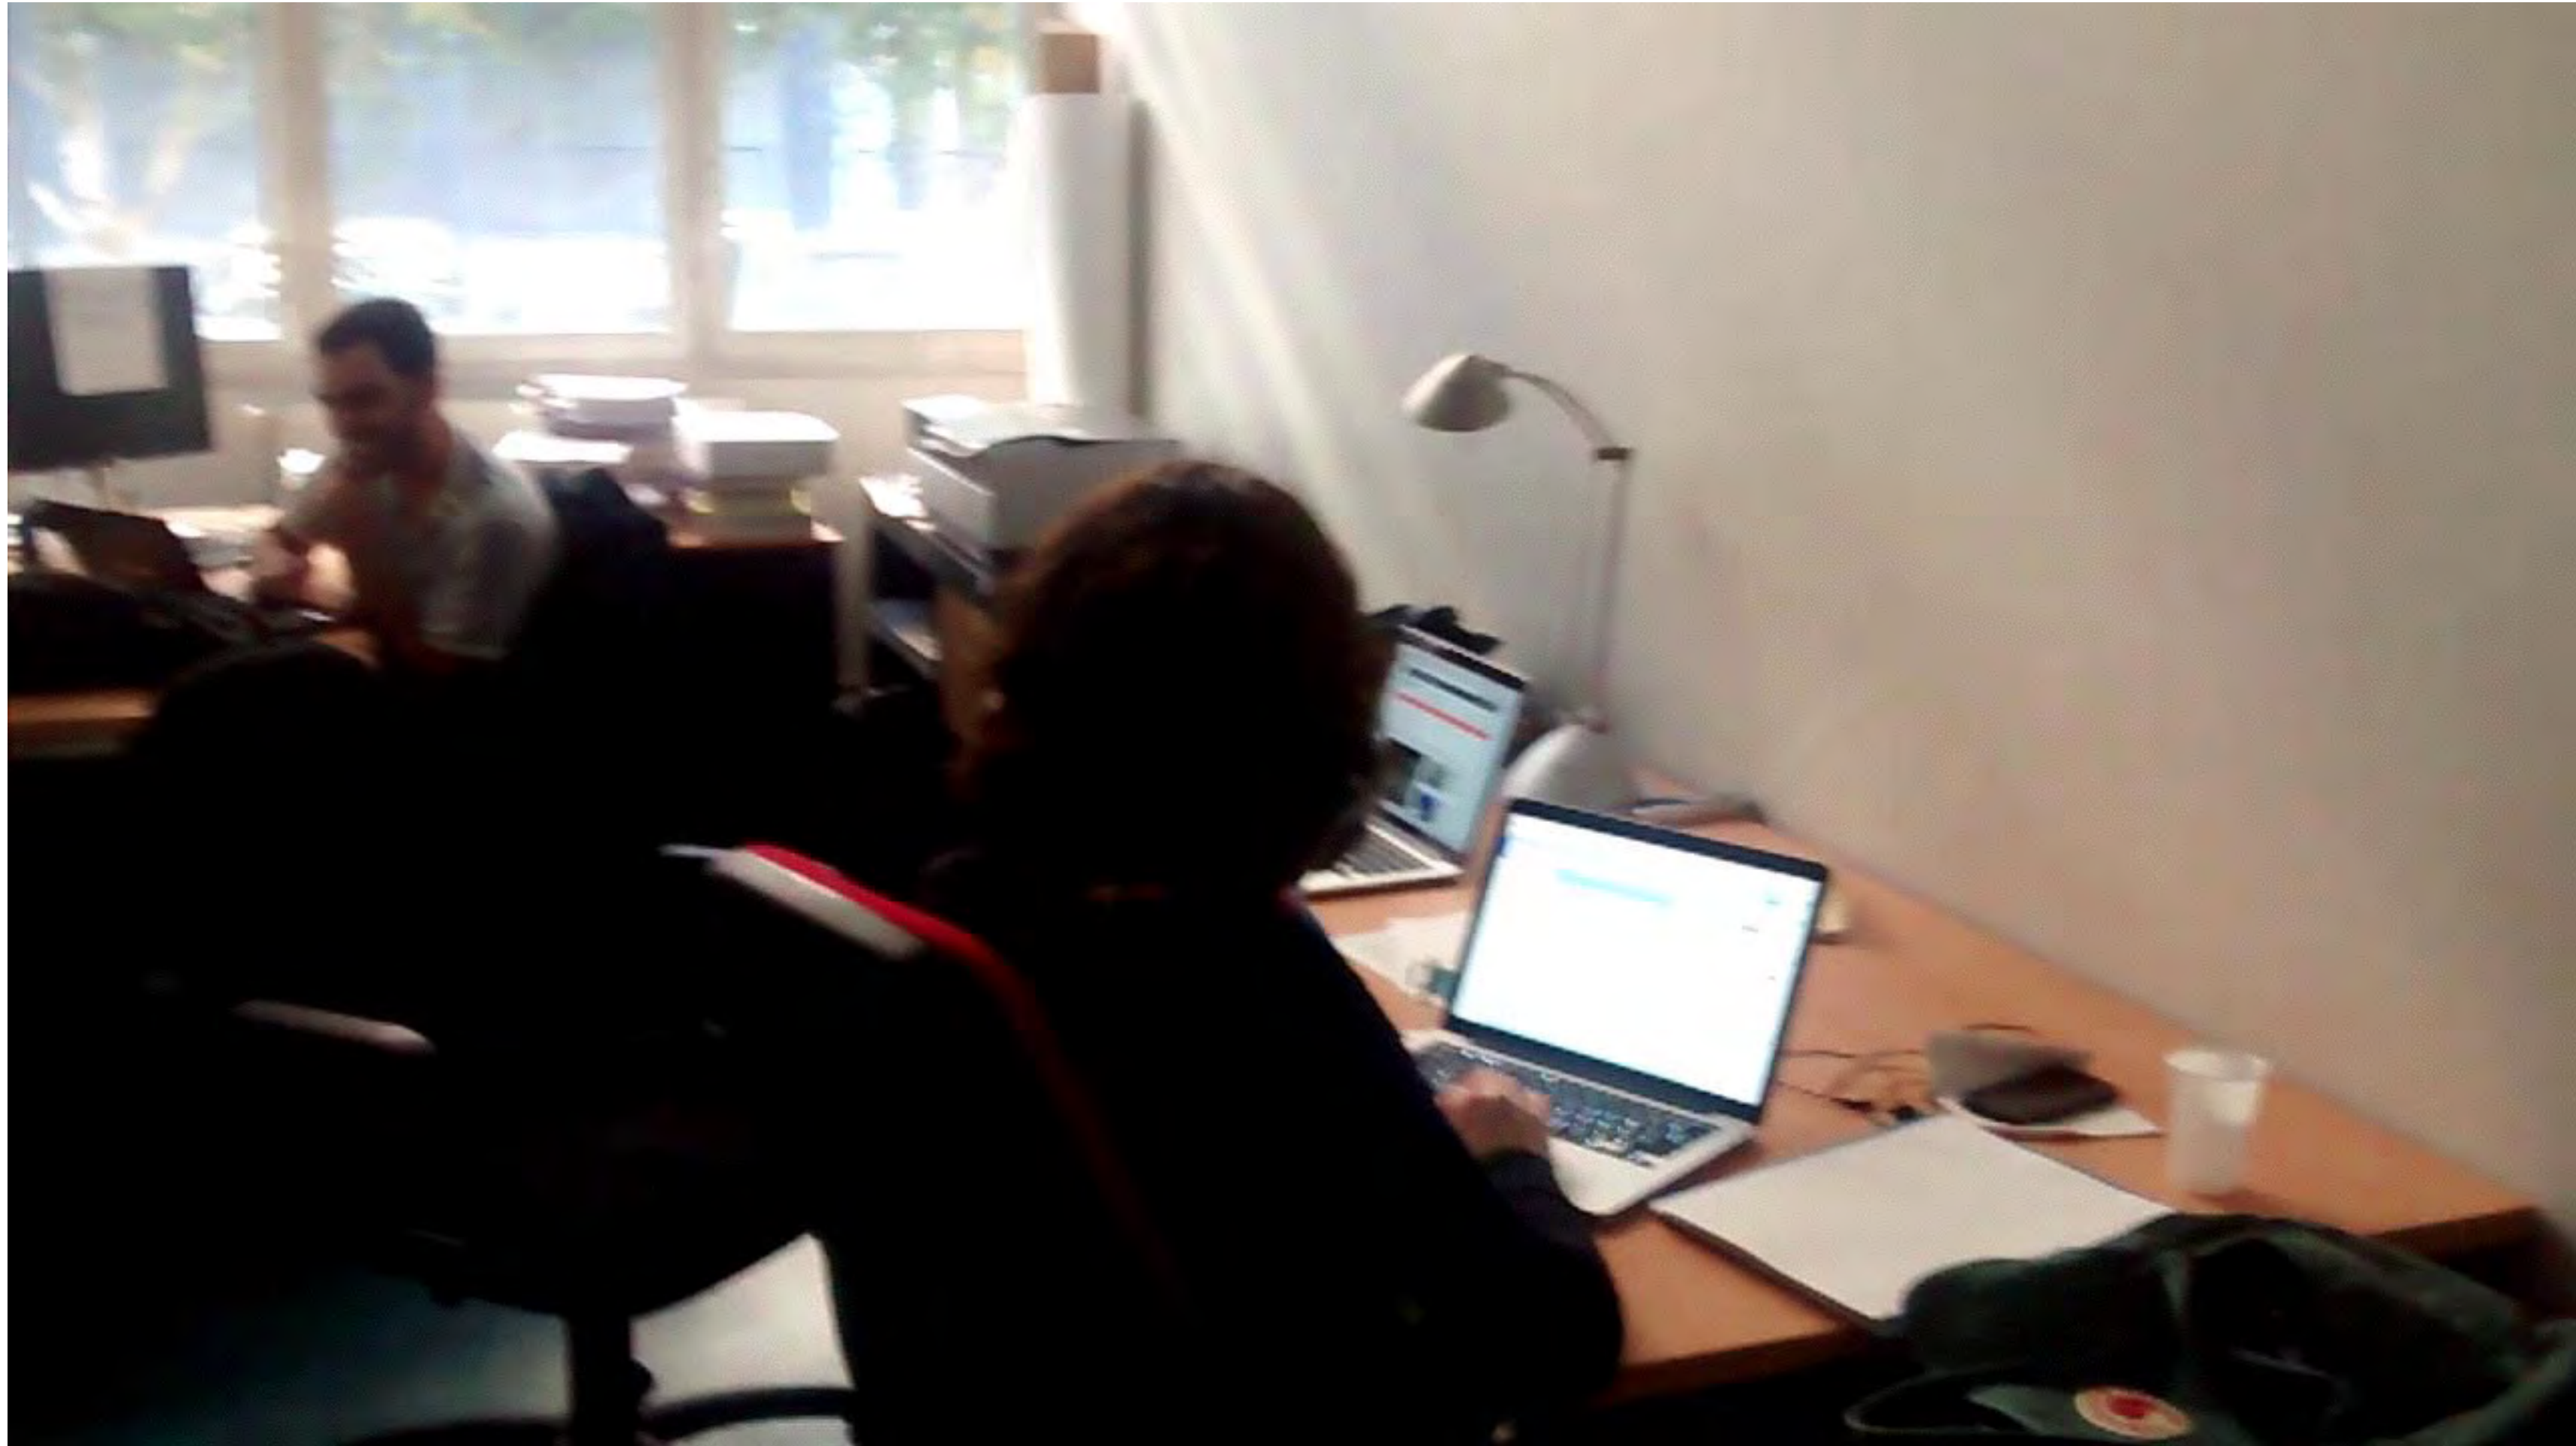

input



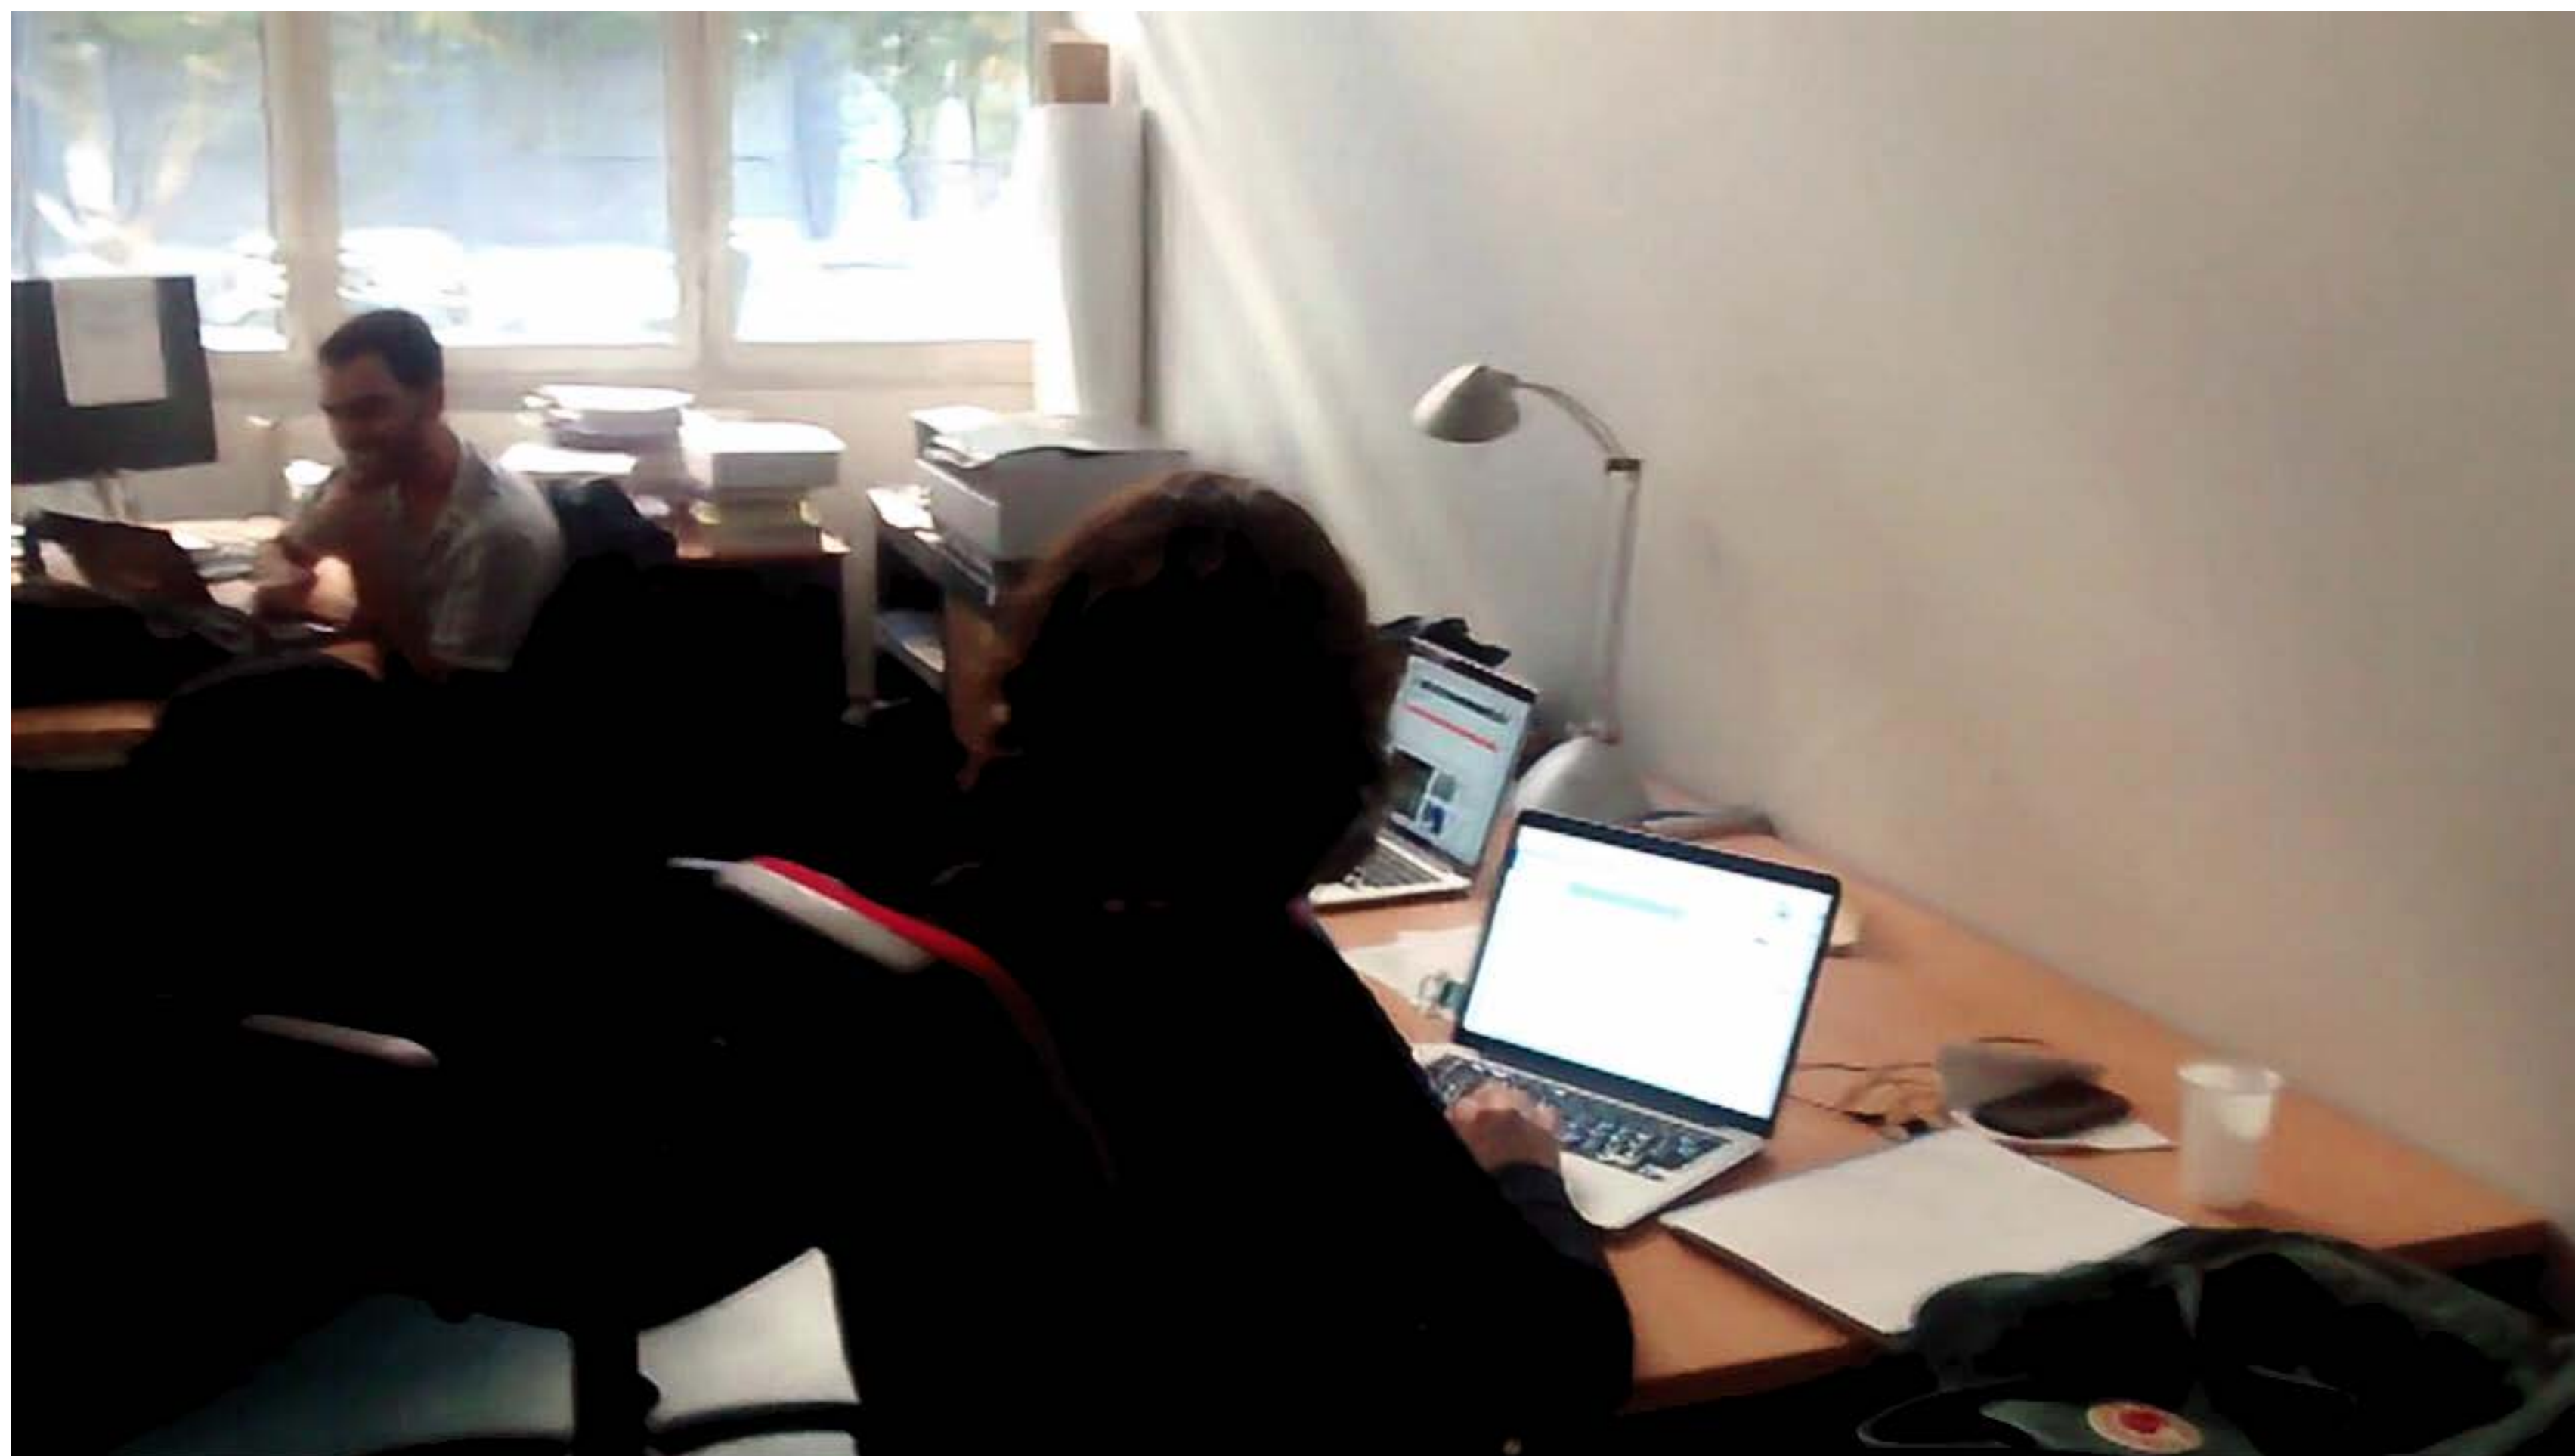

DBN+Noalign



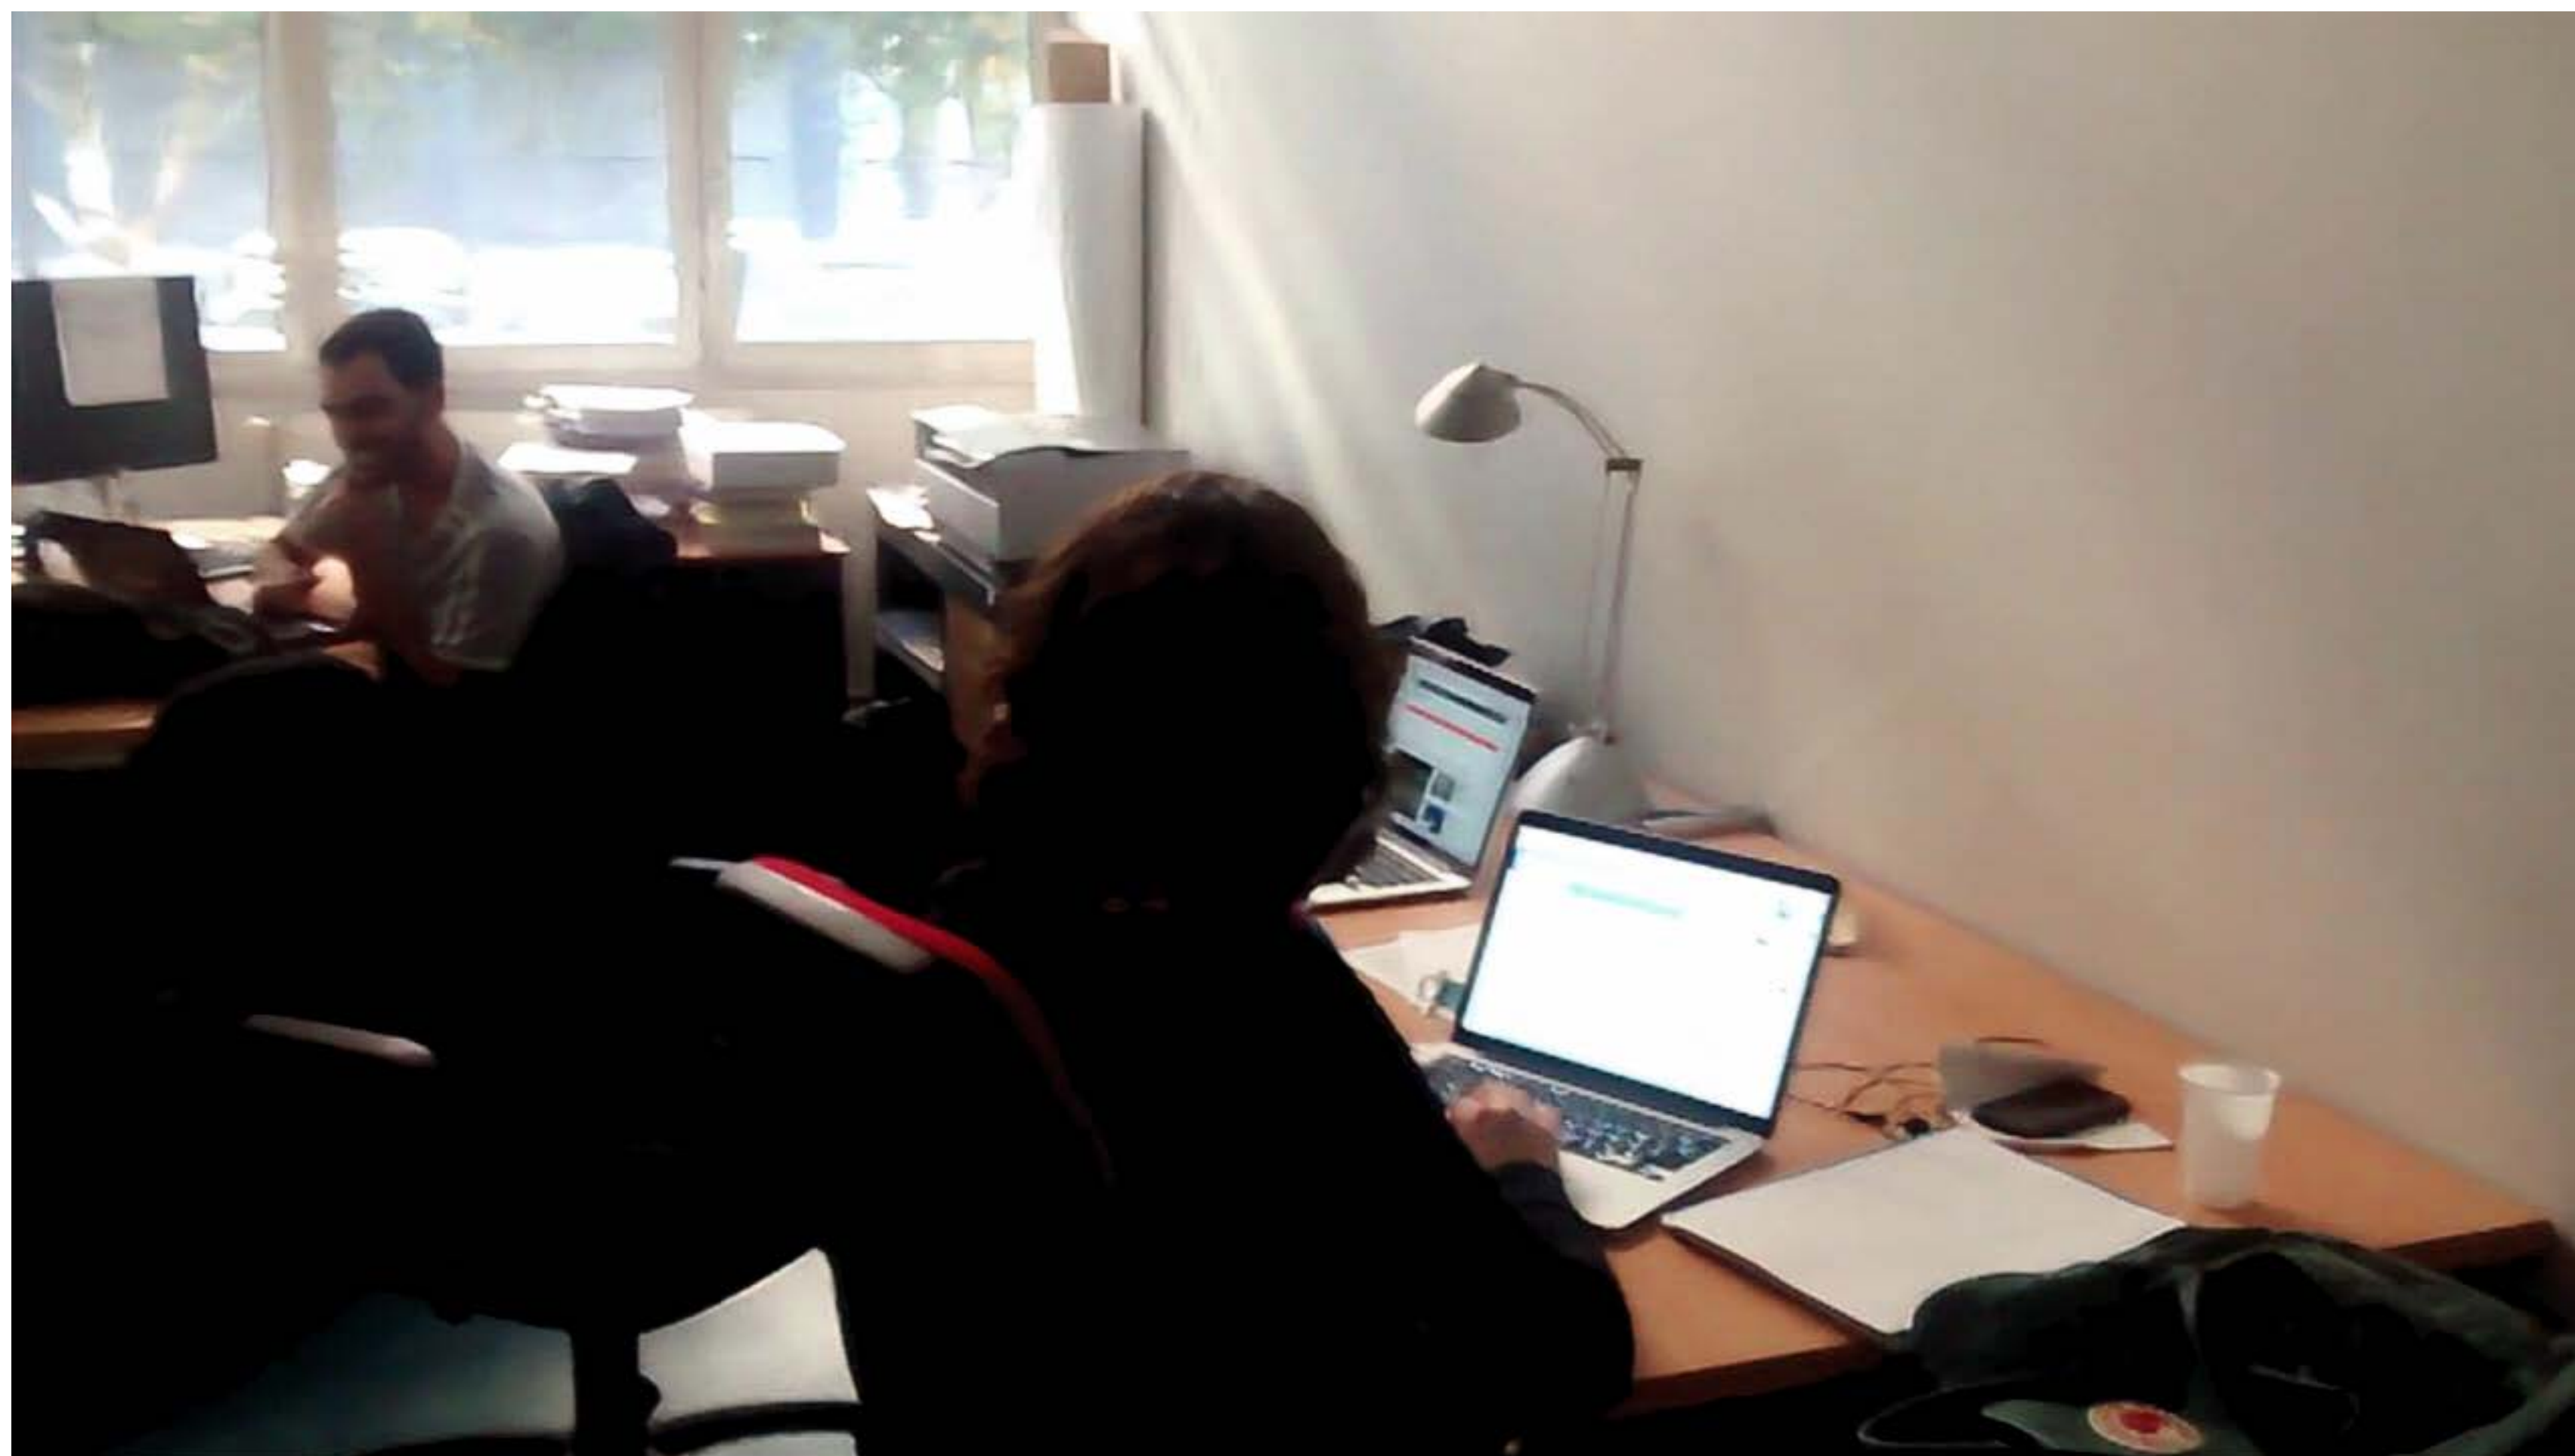

DBN+Homog



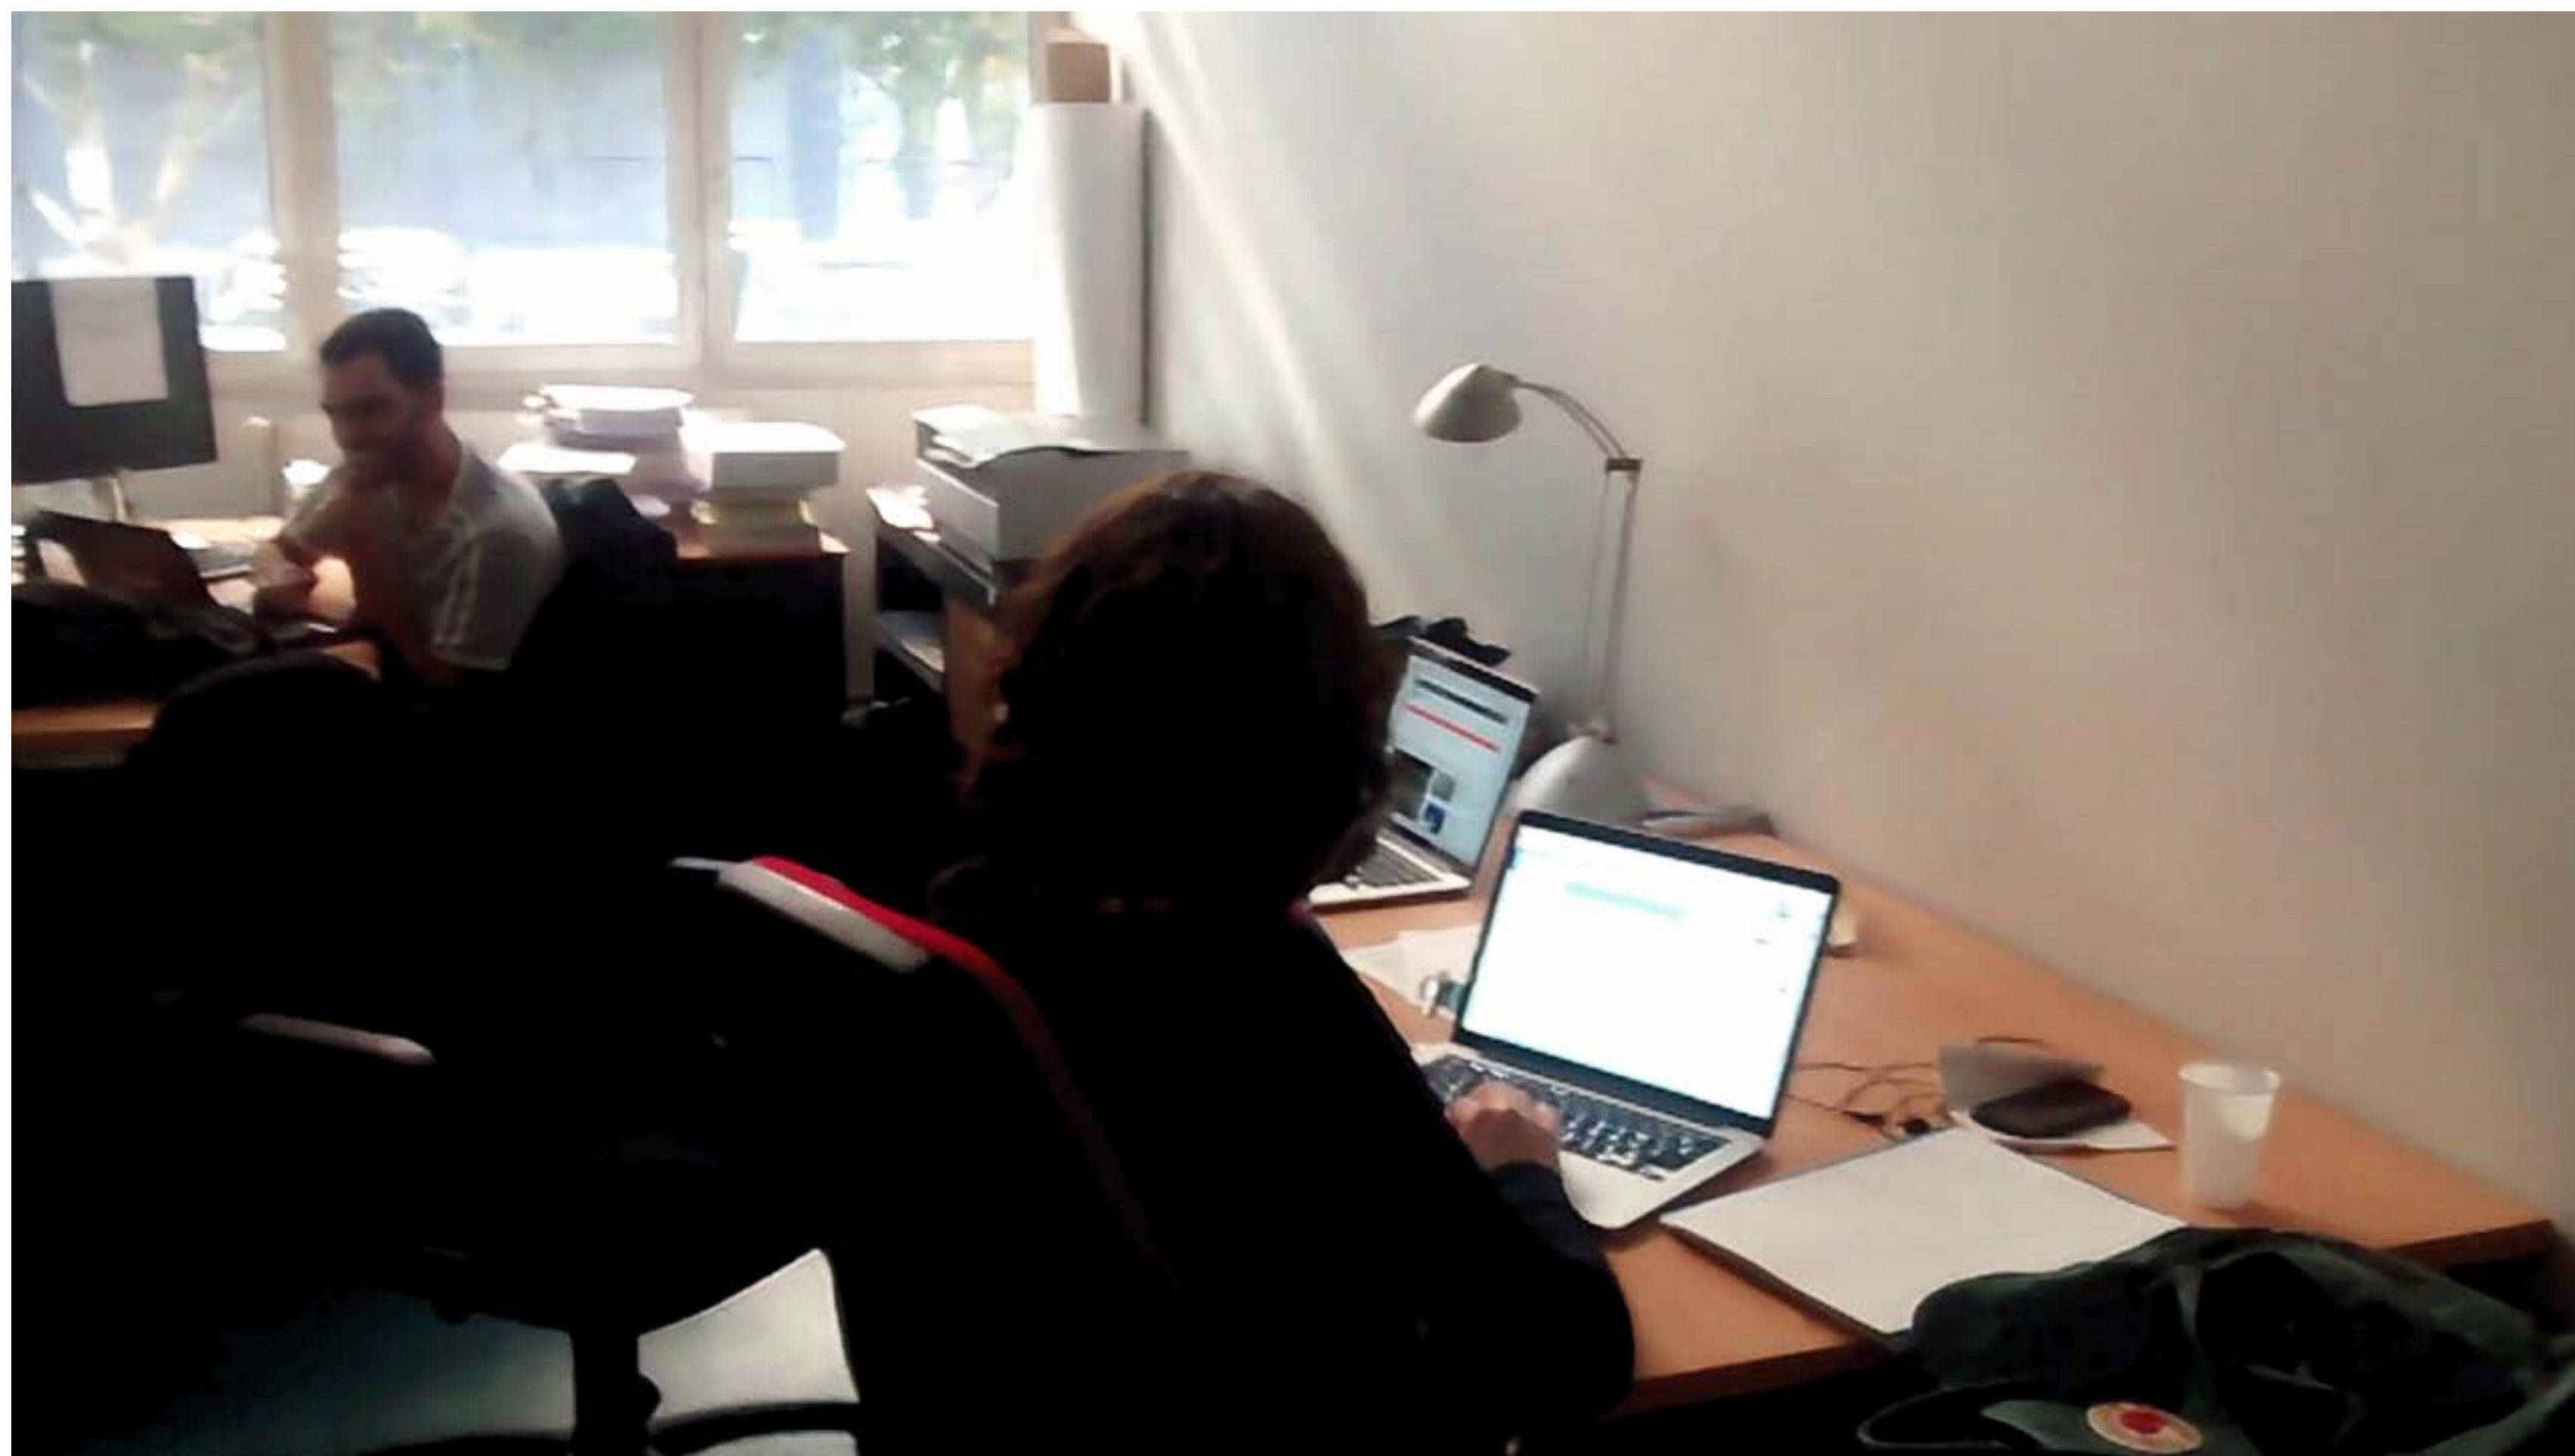

DBN+Flow



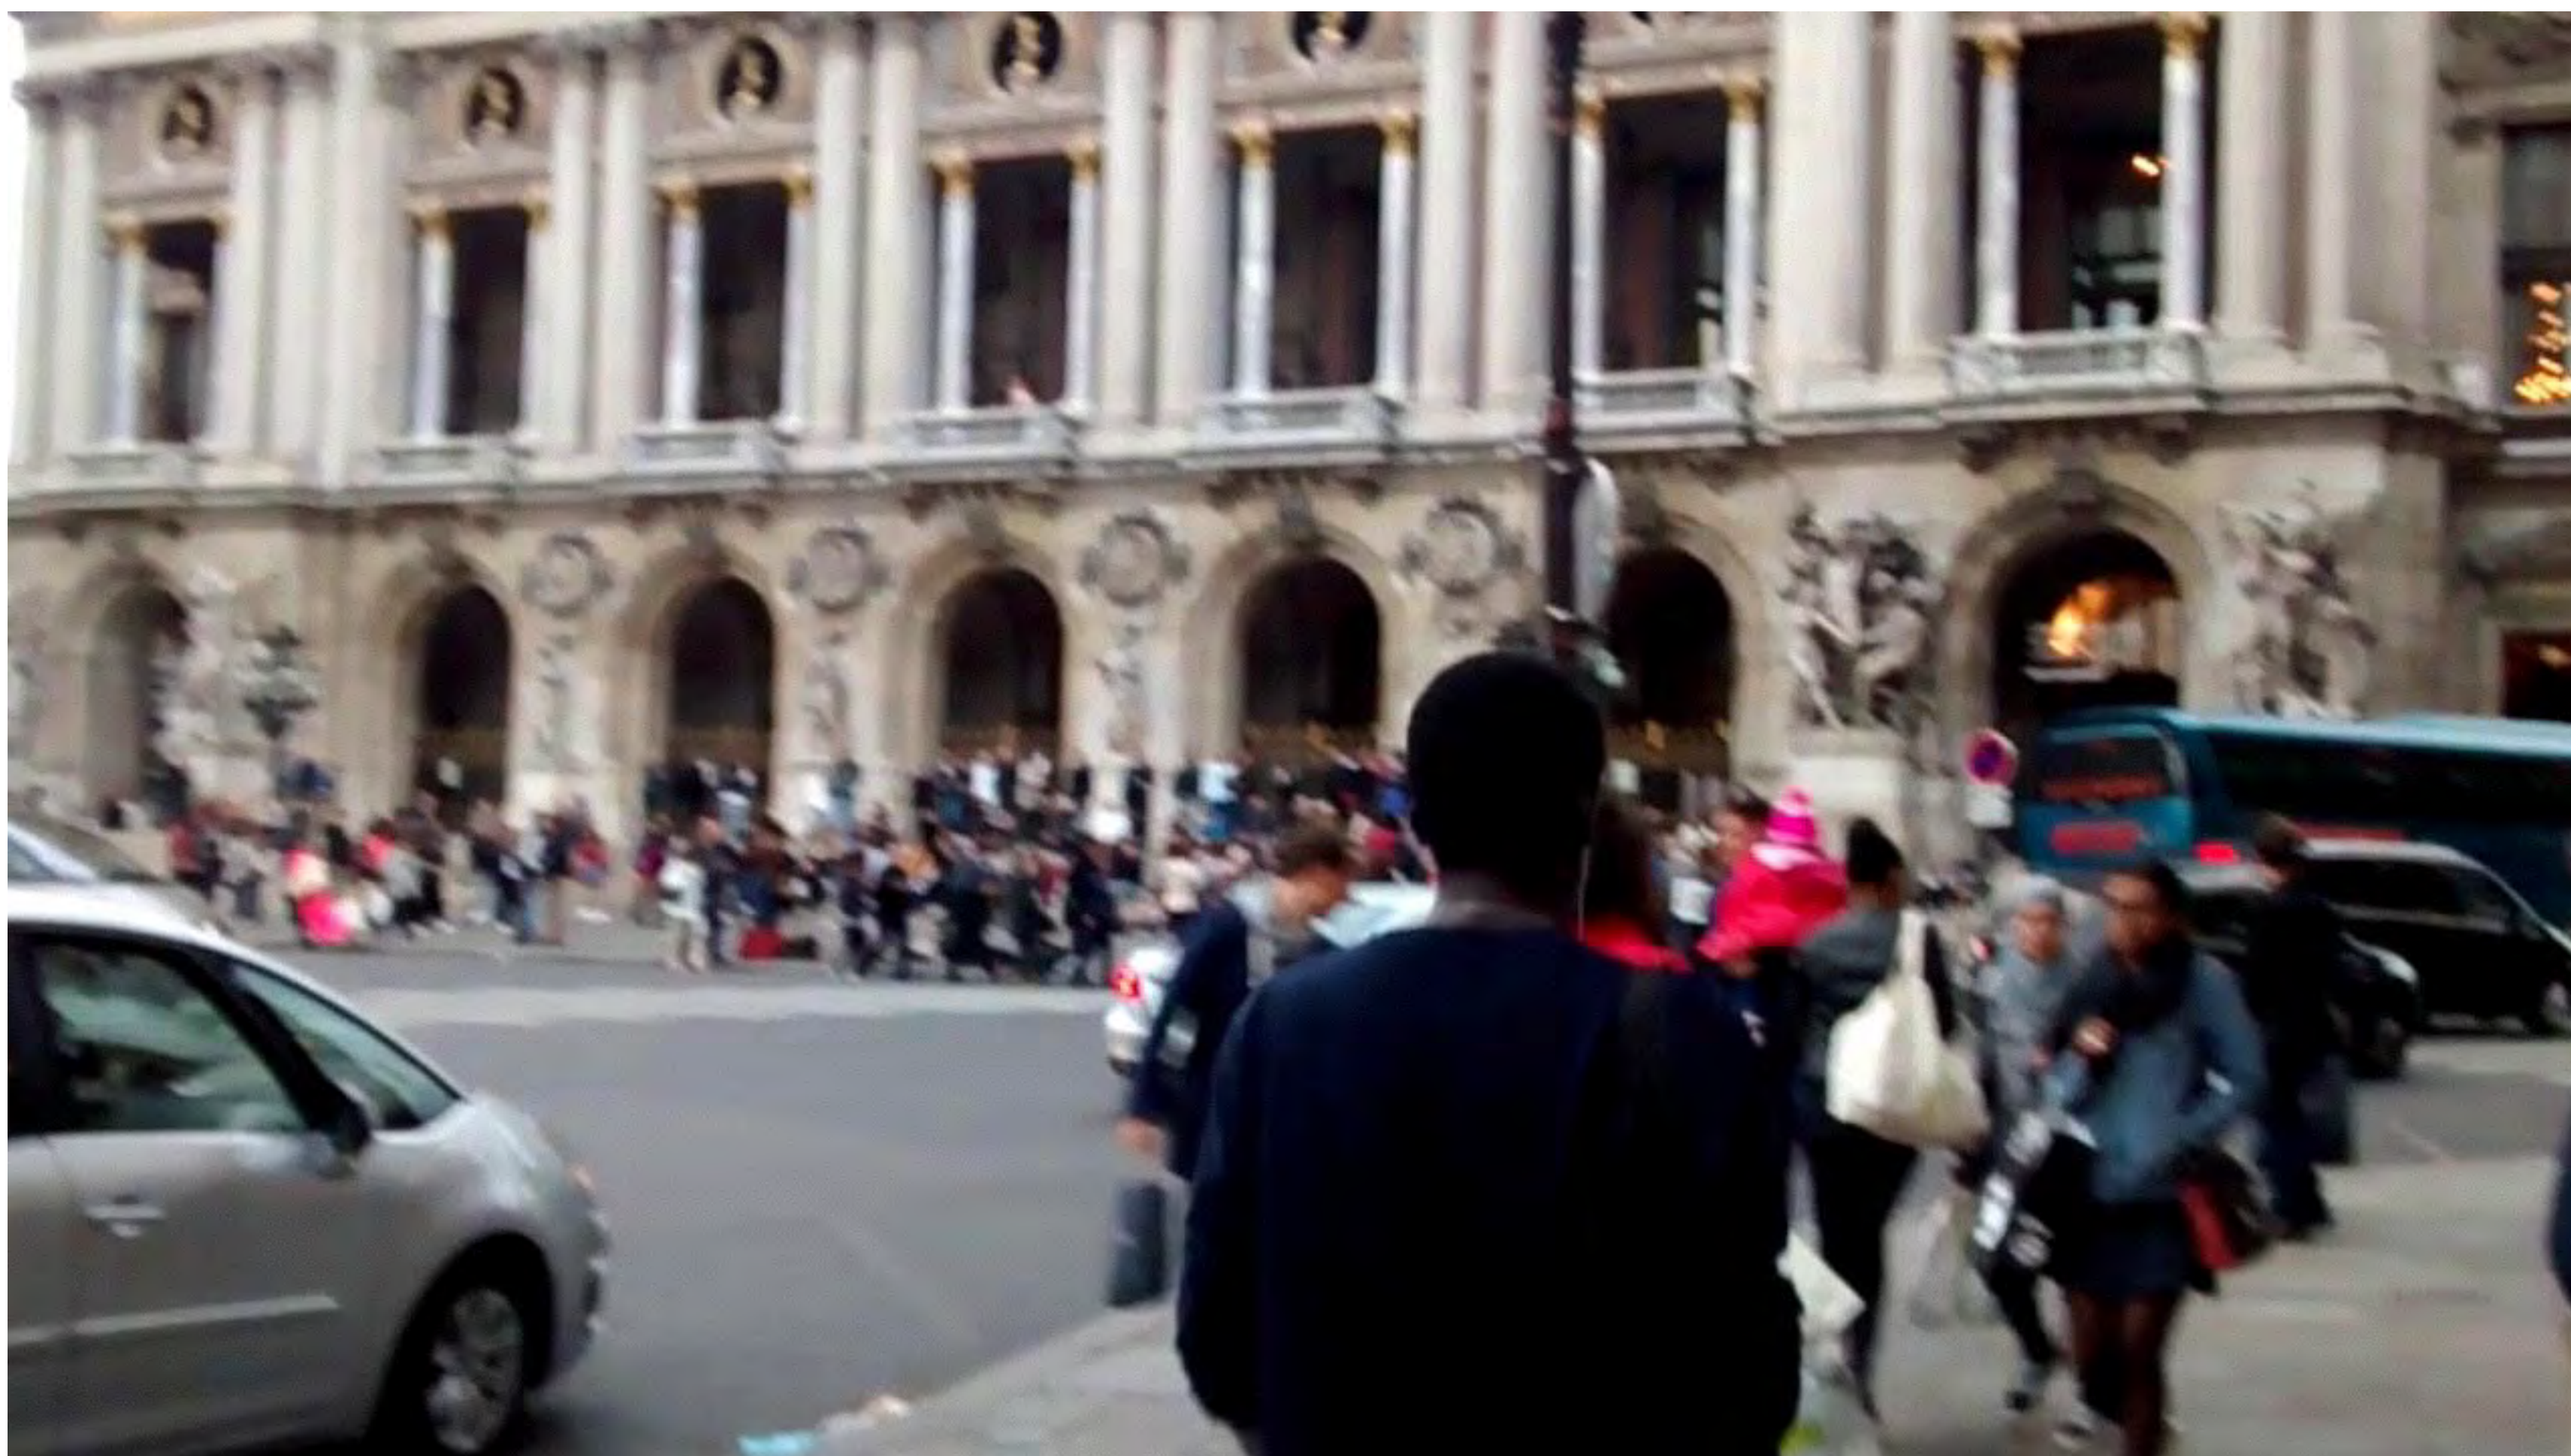

input



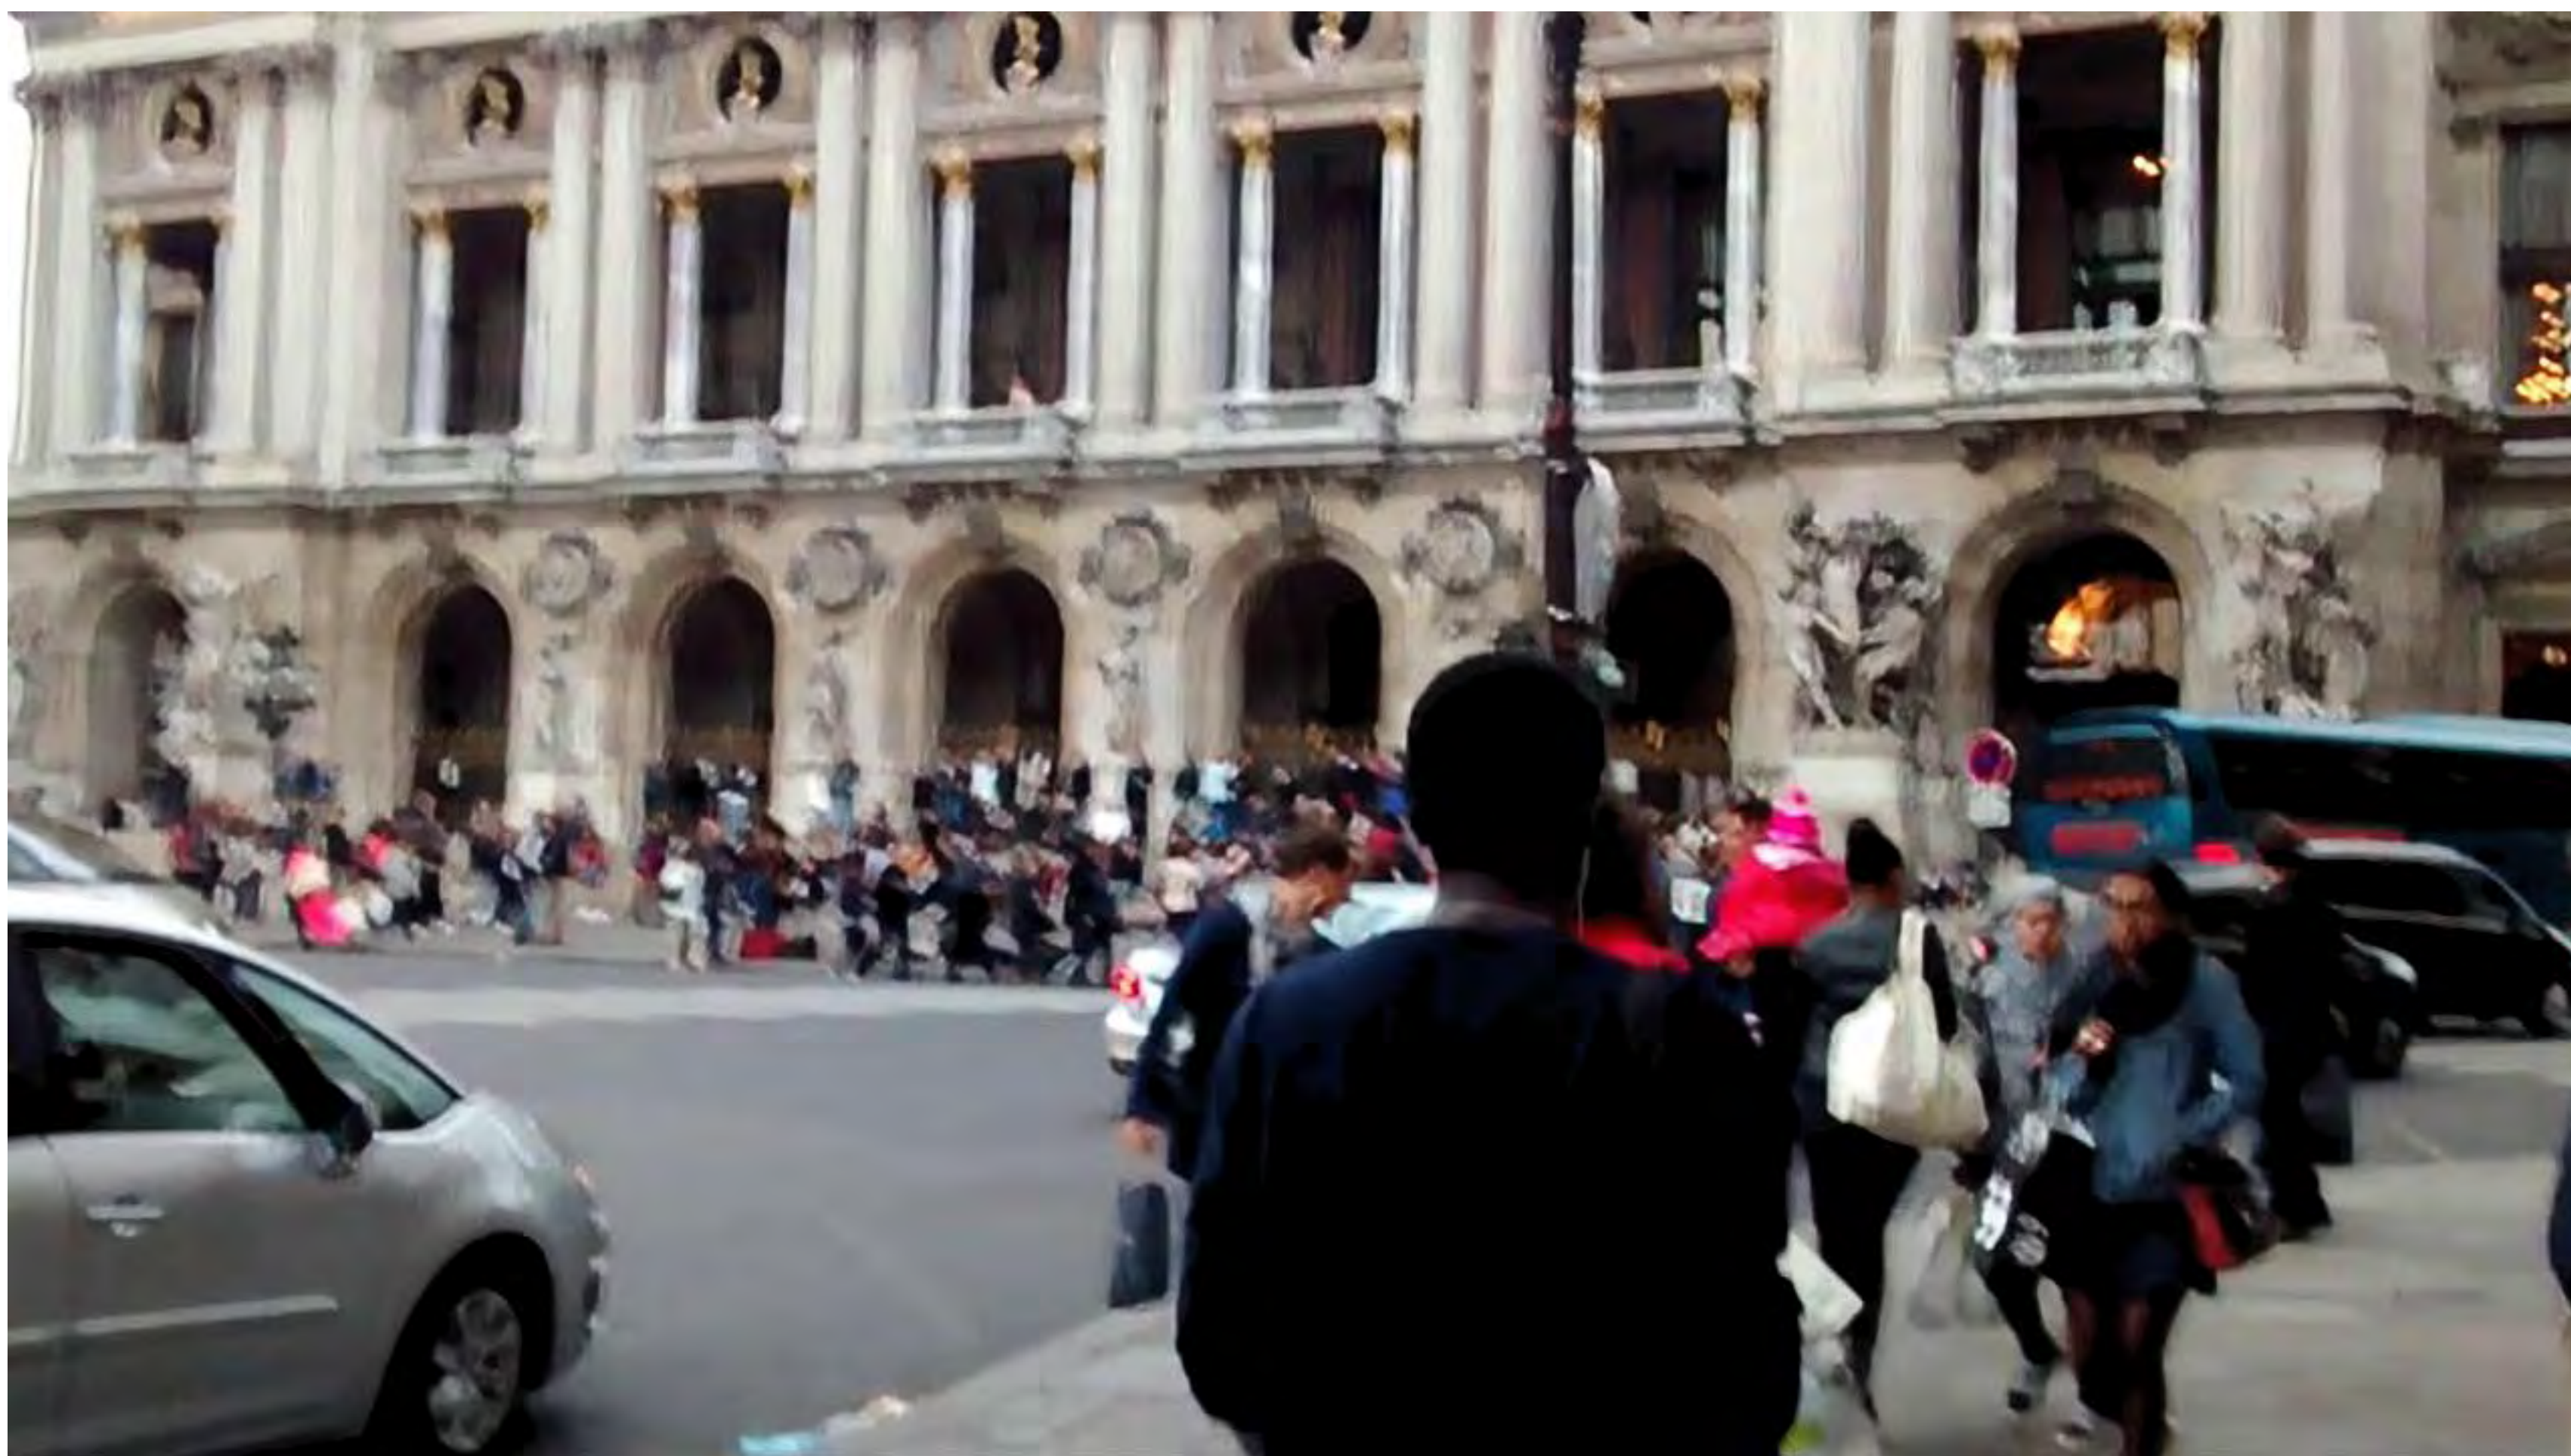

DBN+Noalign



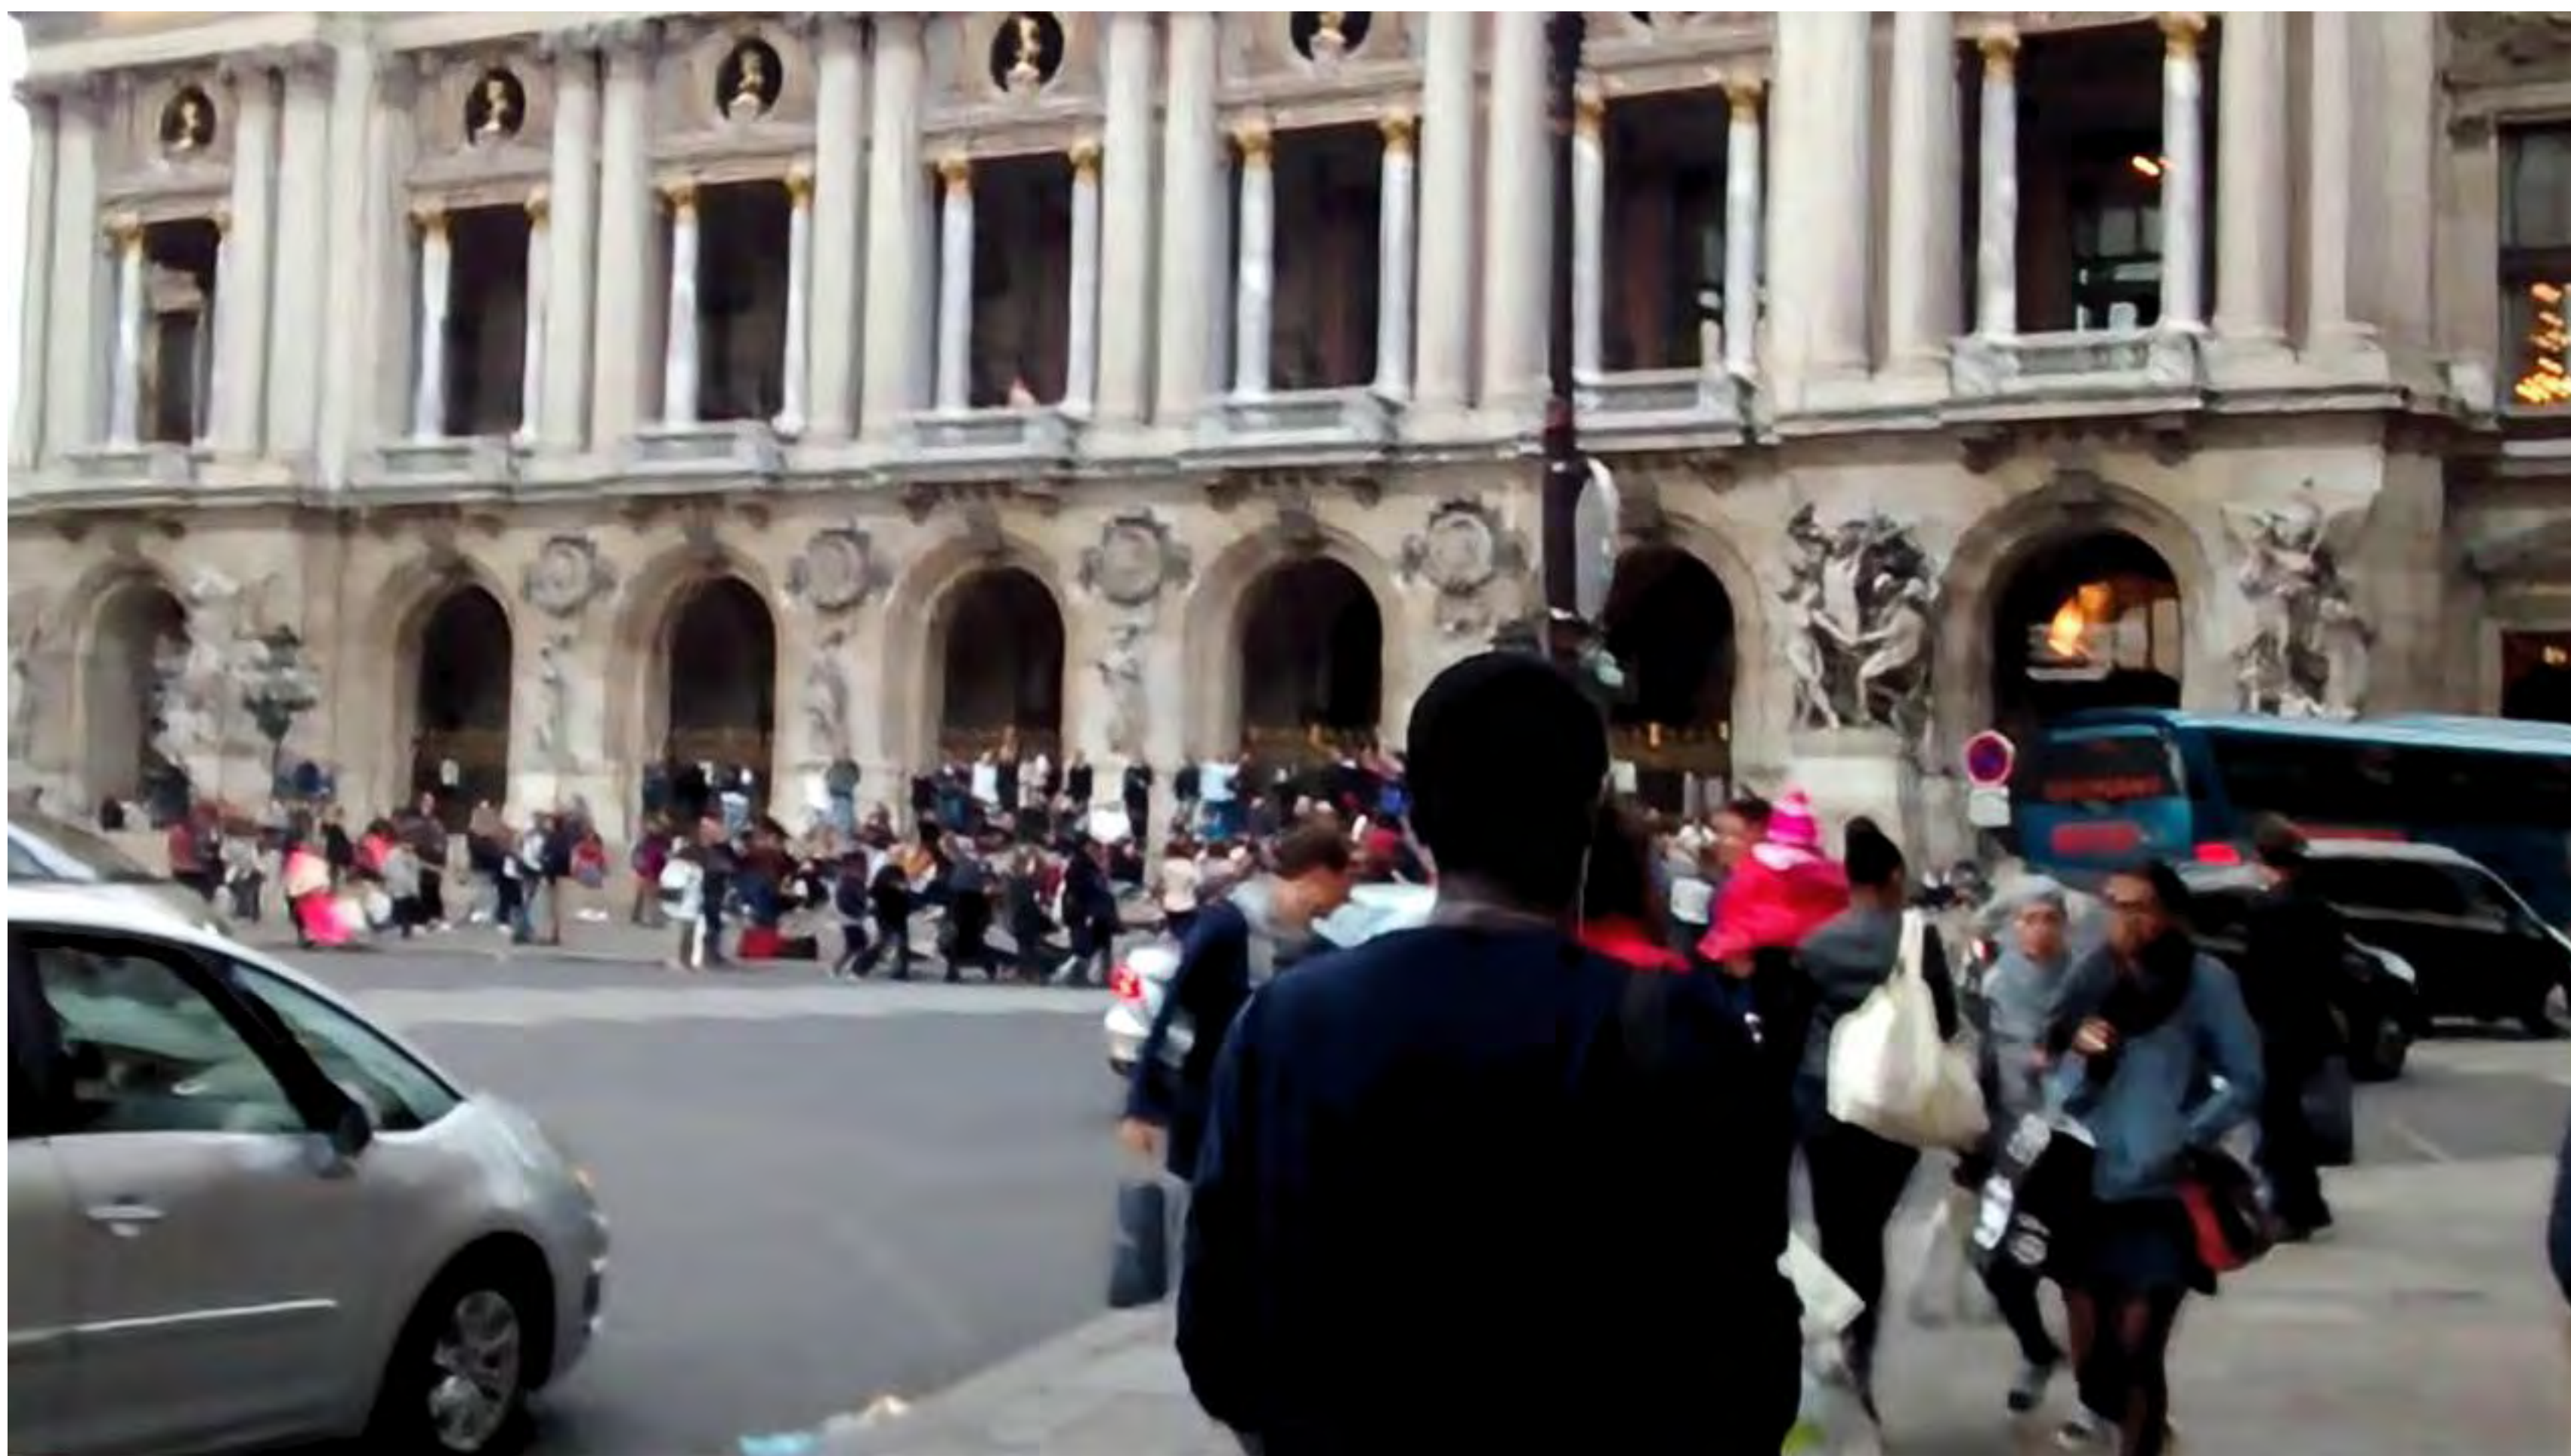

DBN+Homog



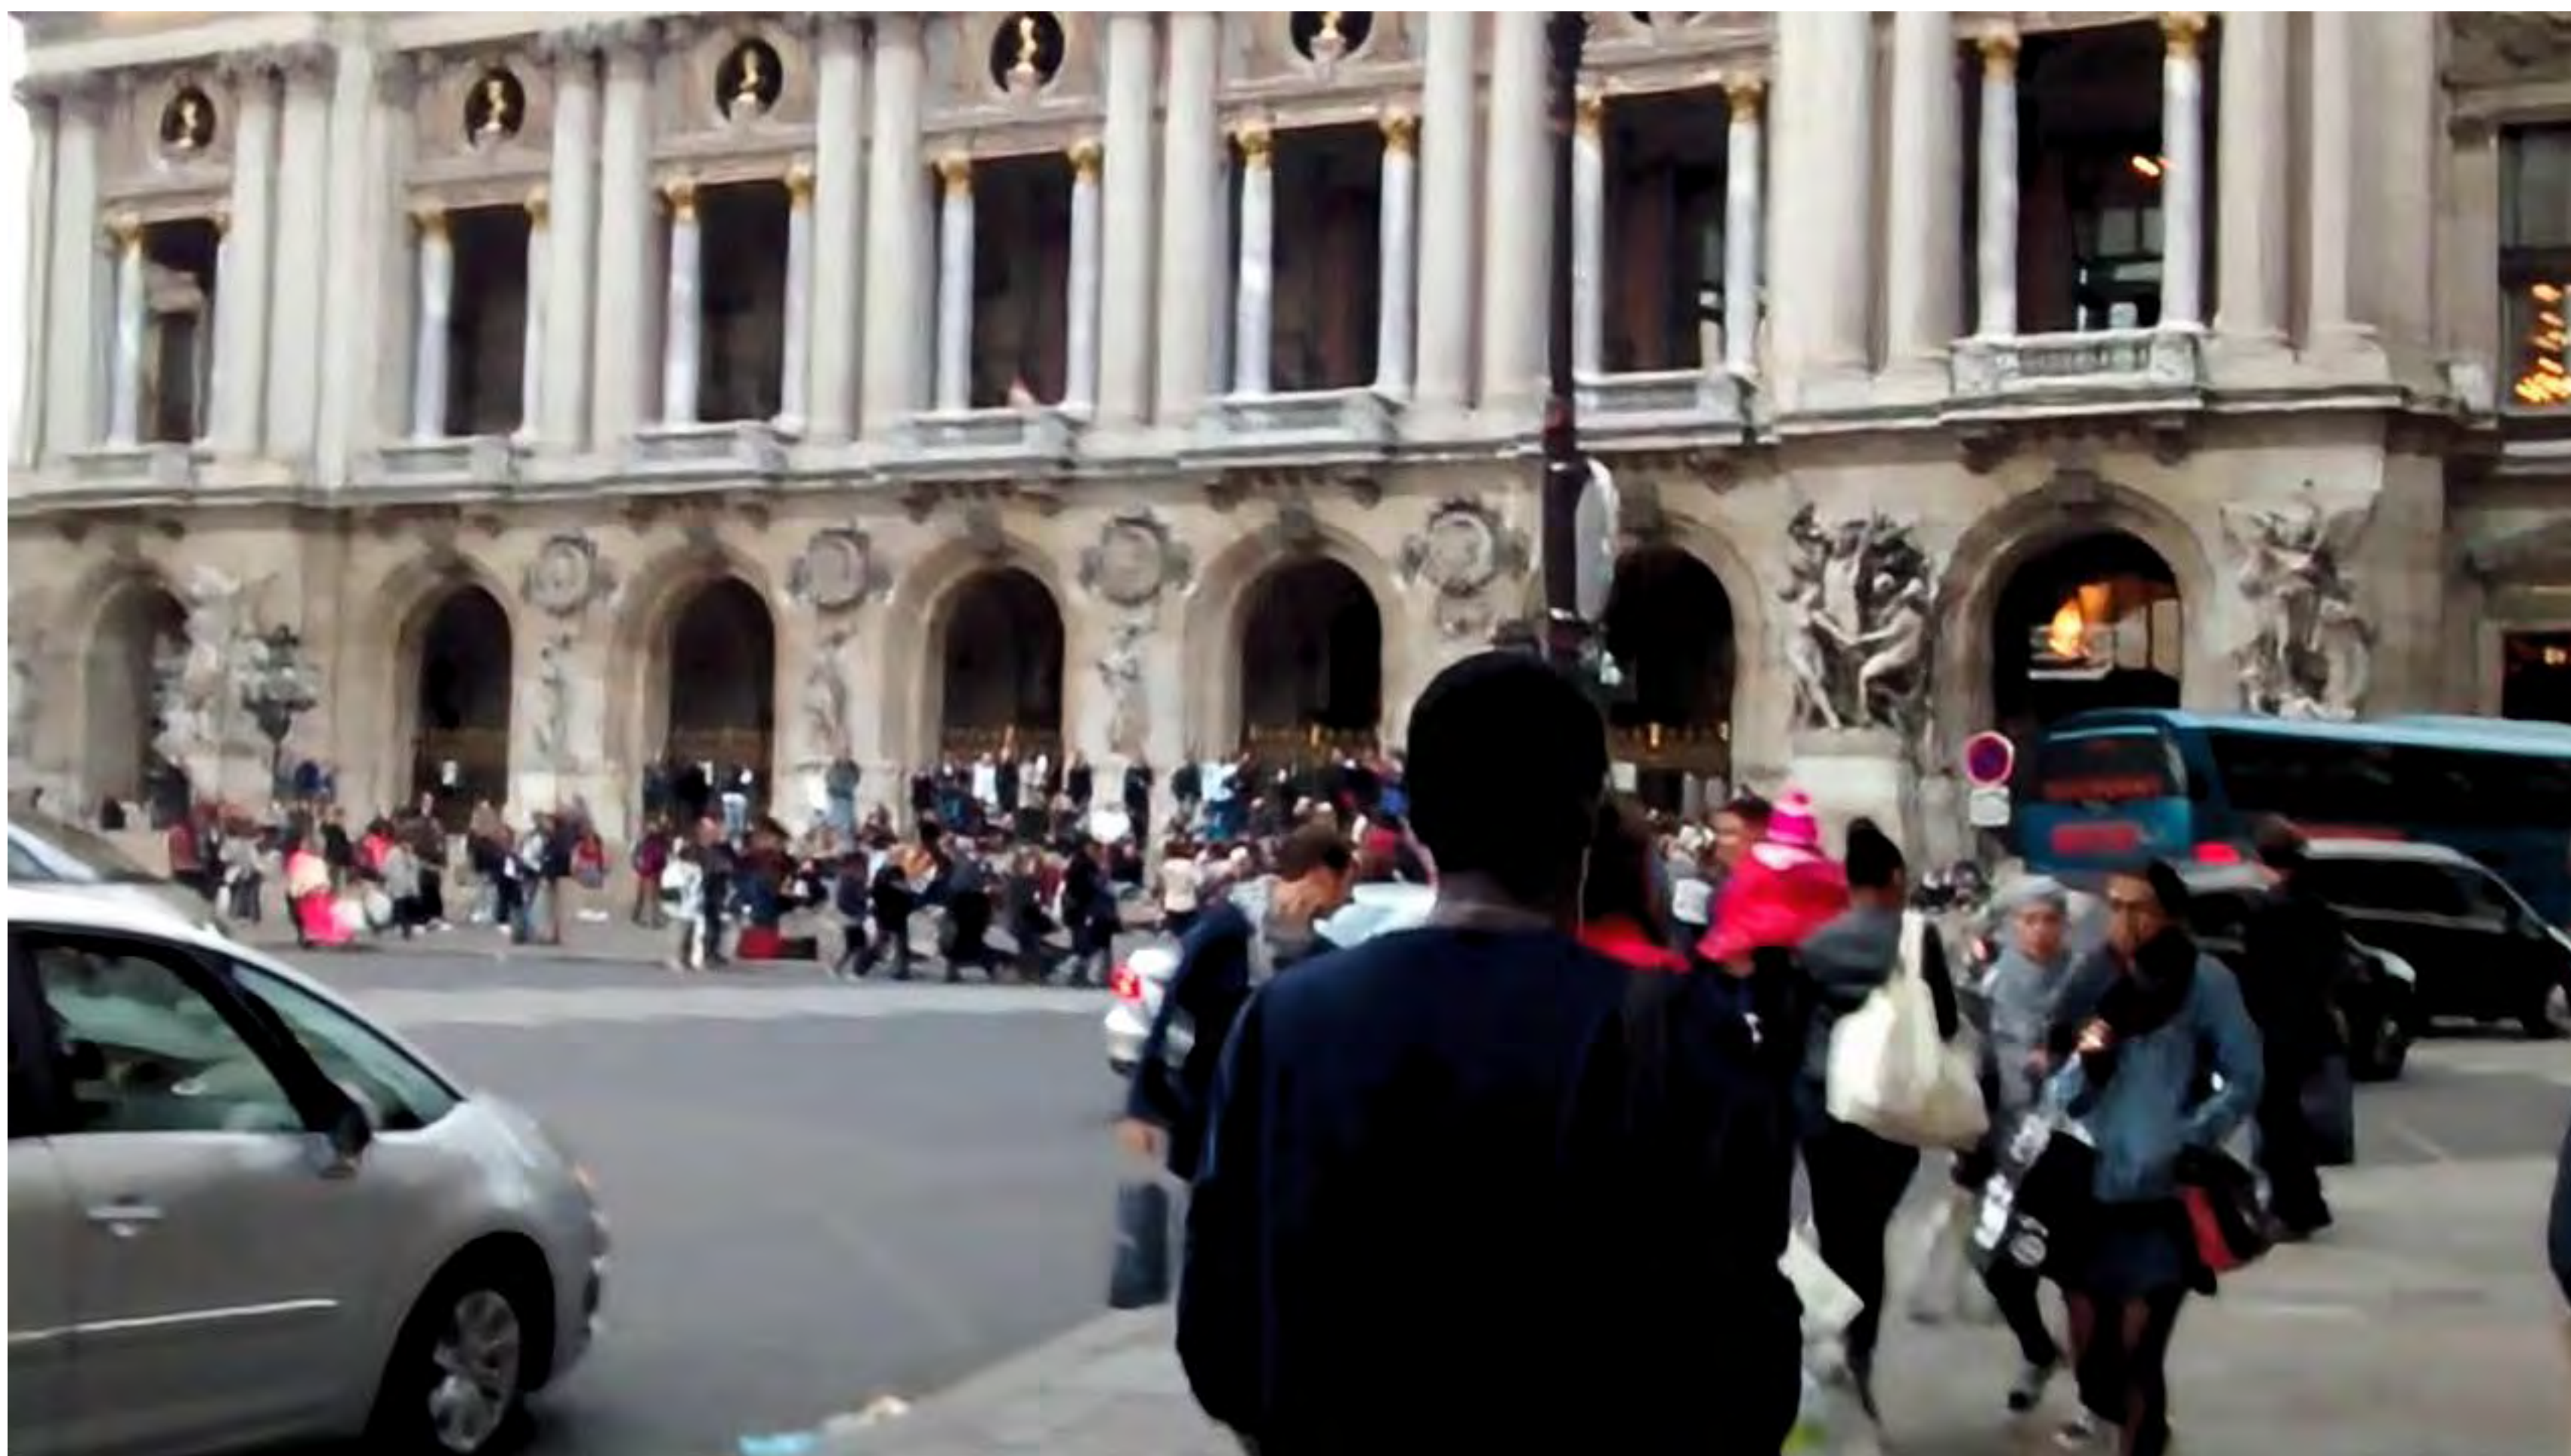

DBN+Flow



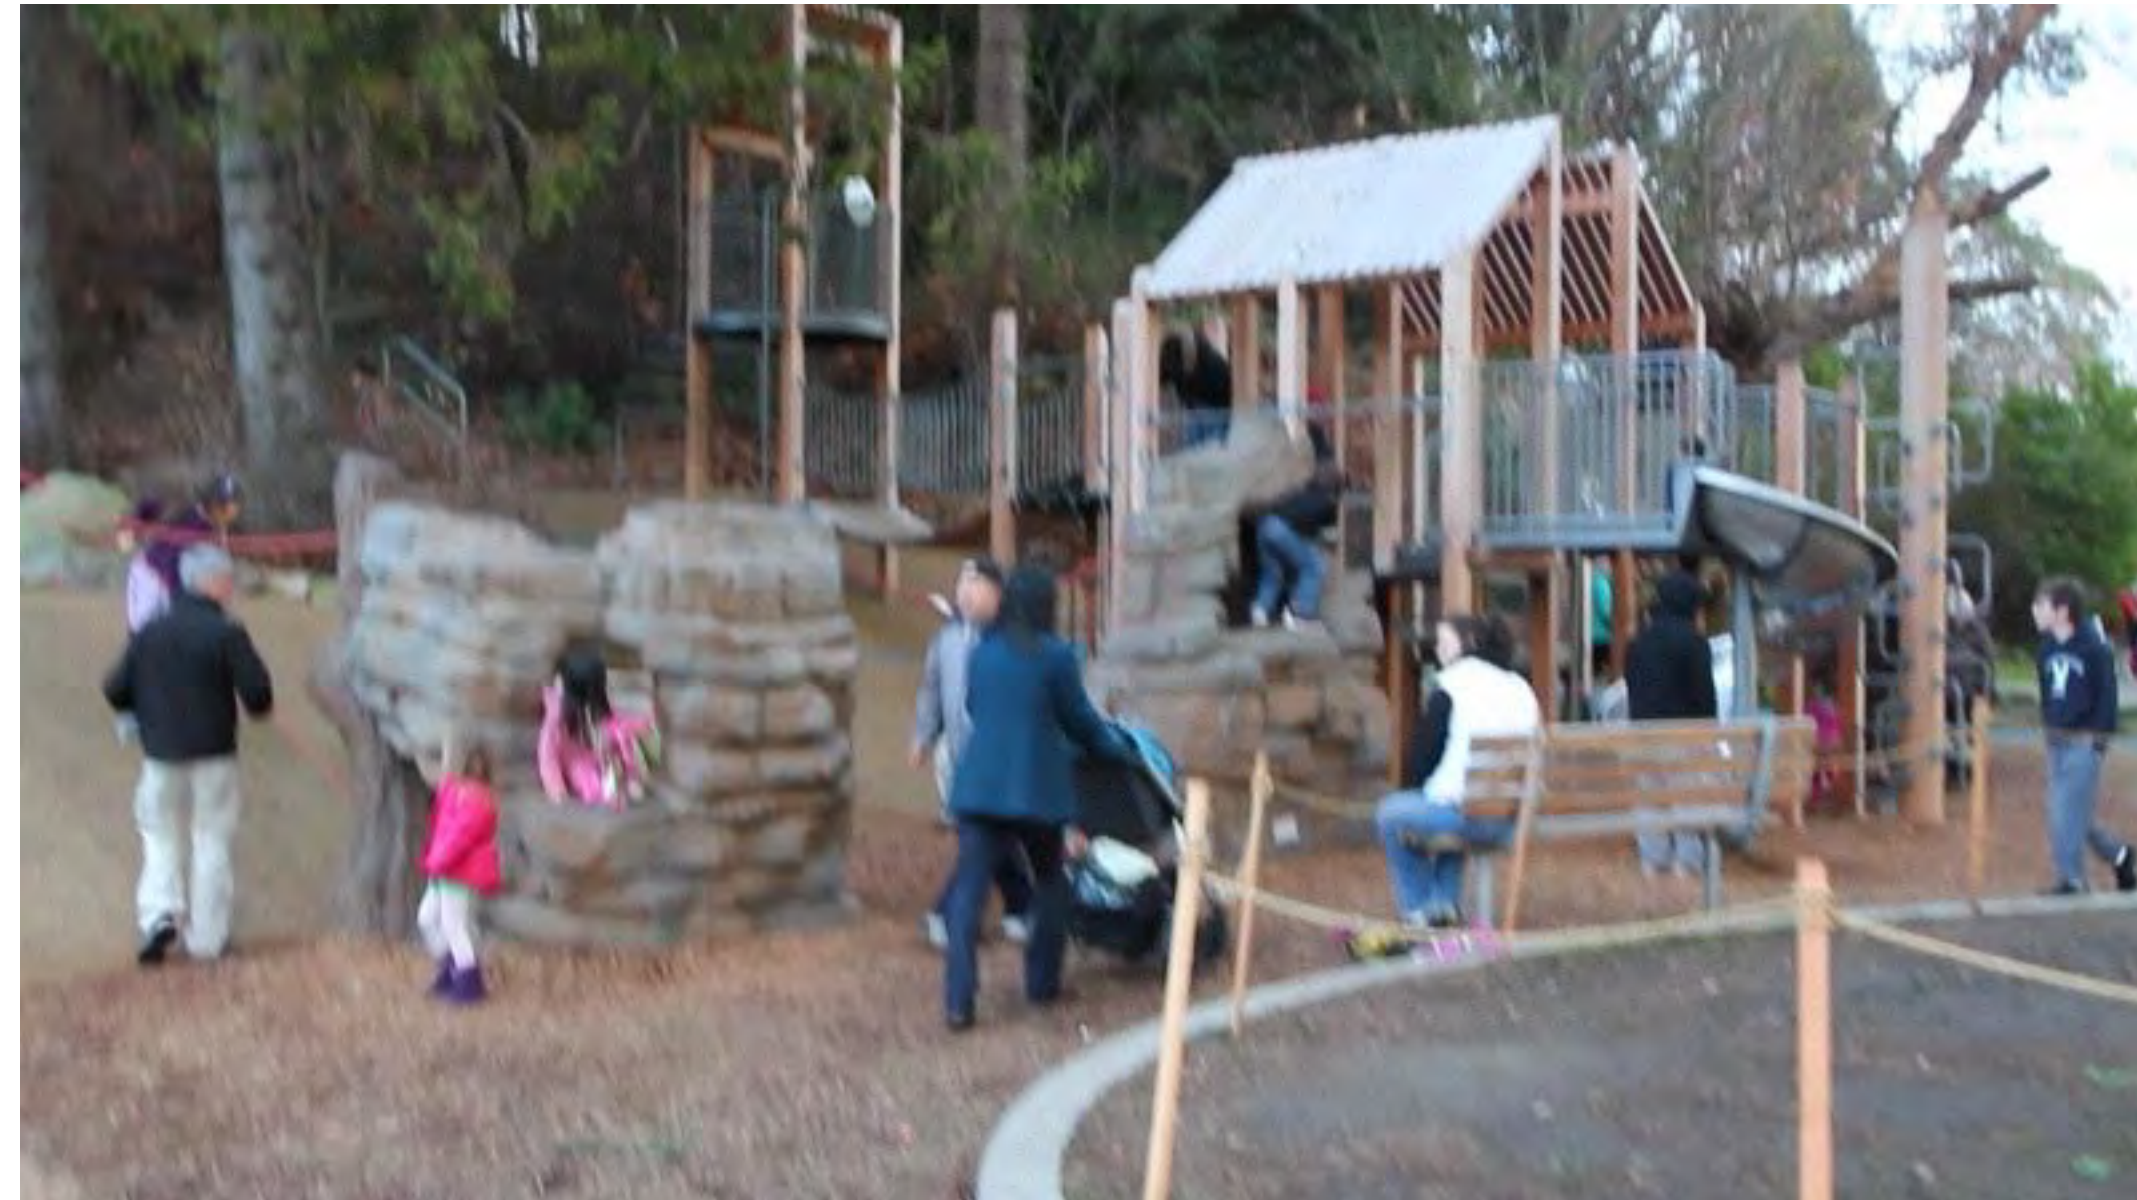

input



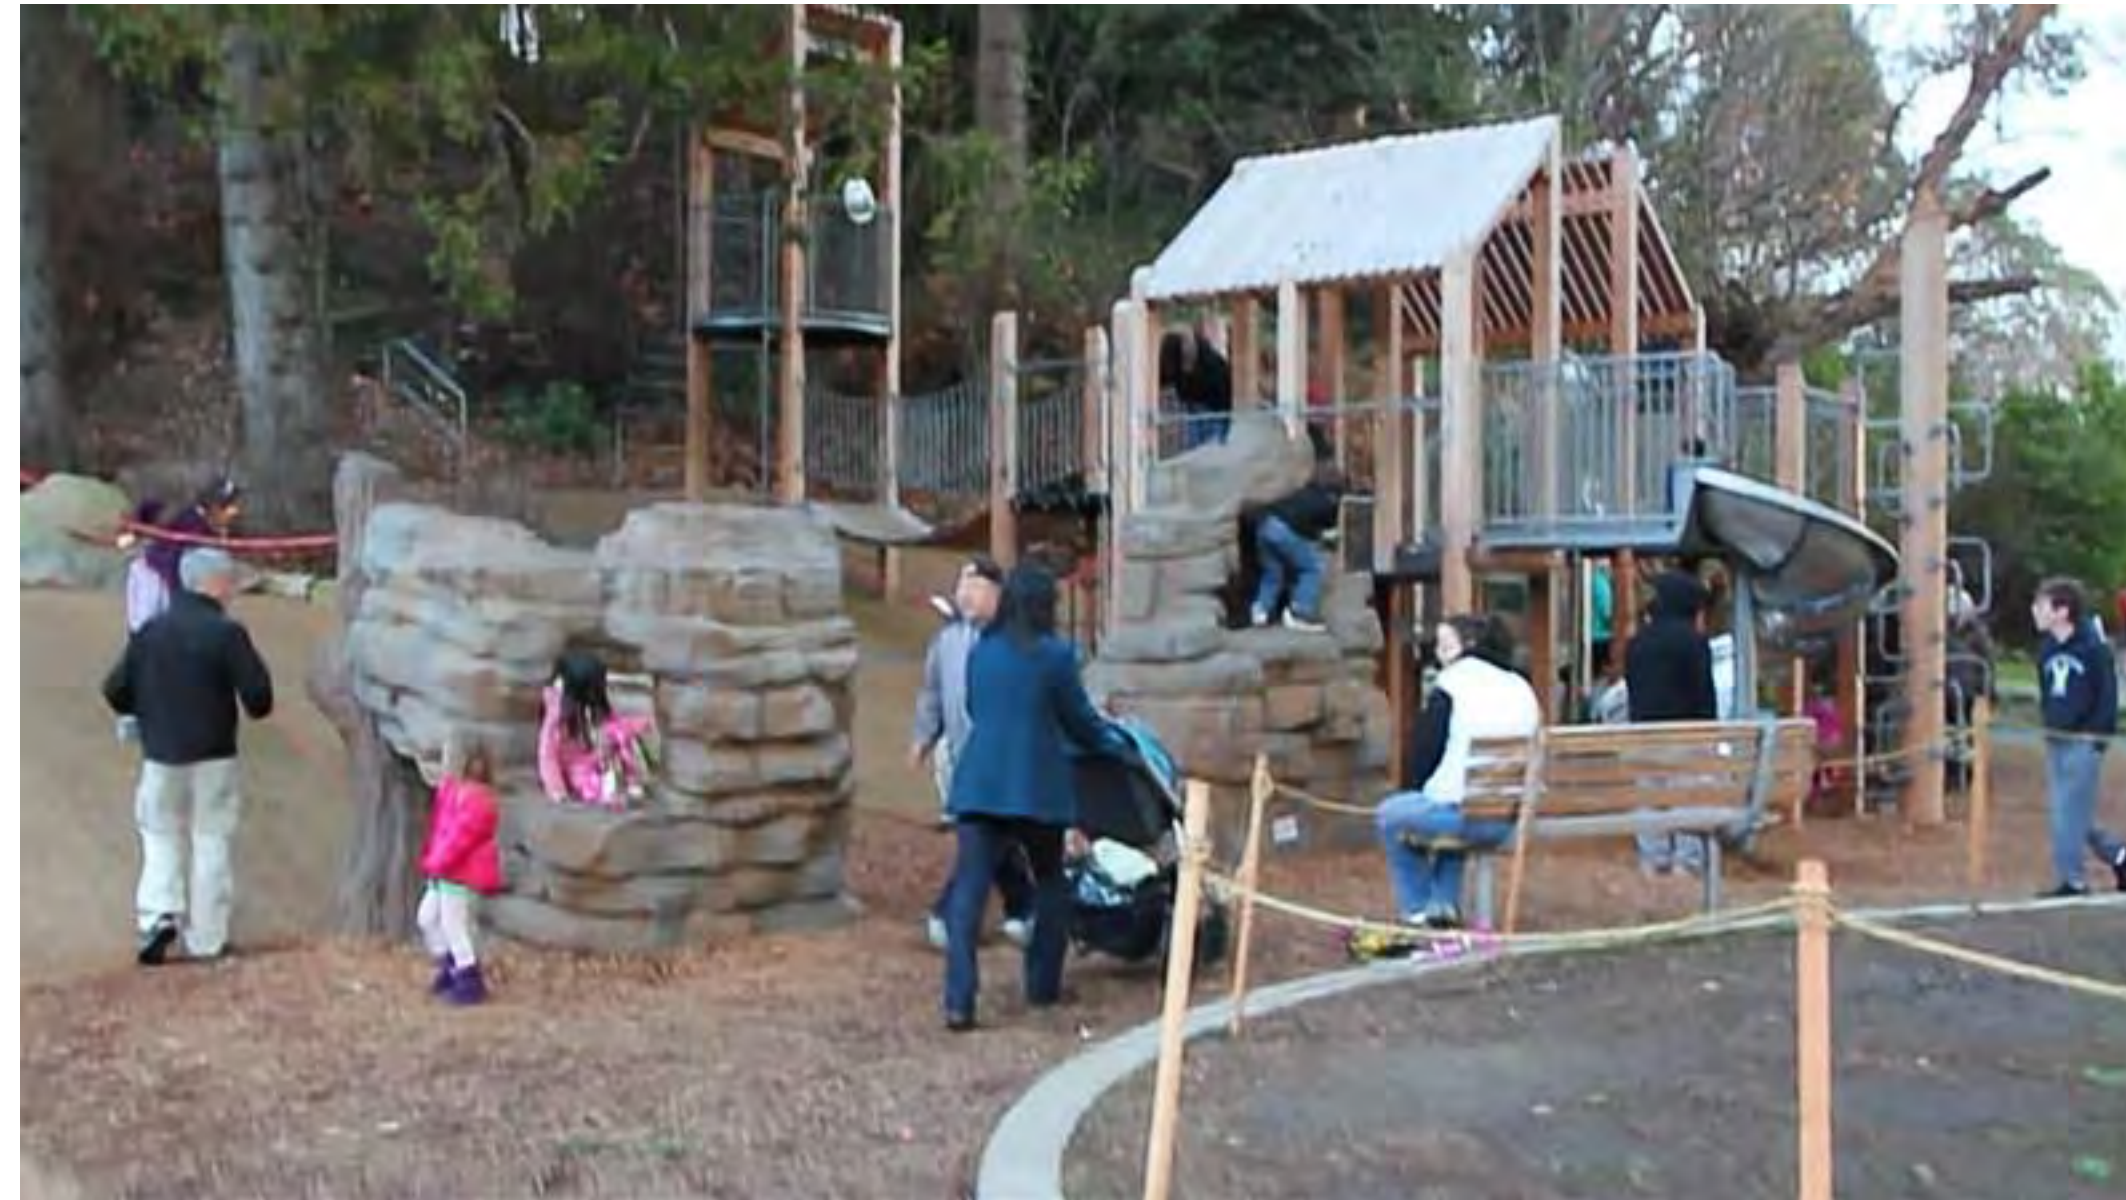

DBN+Noalign



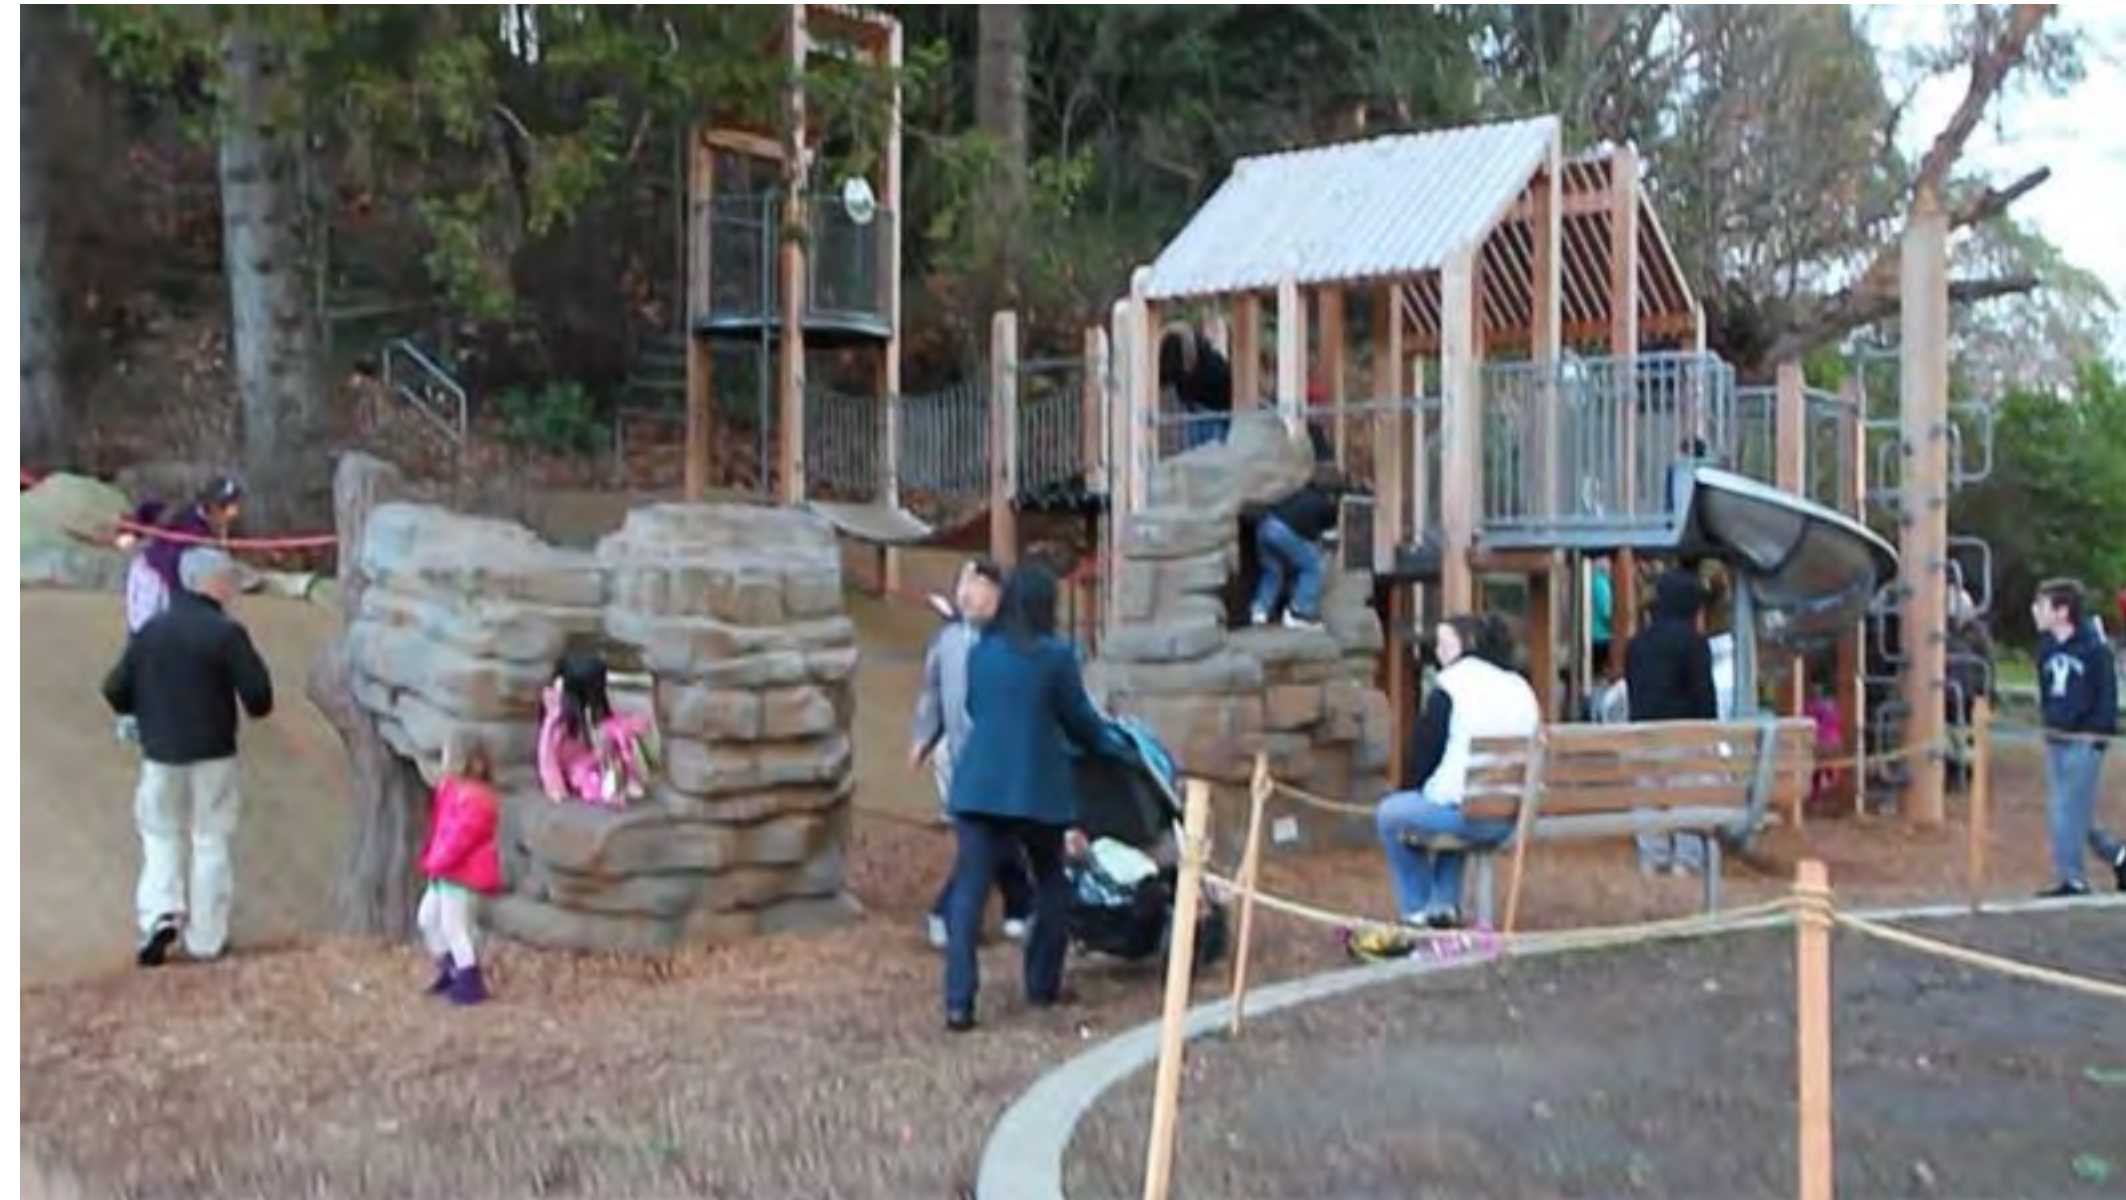

DBN+Homog



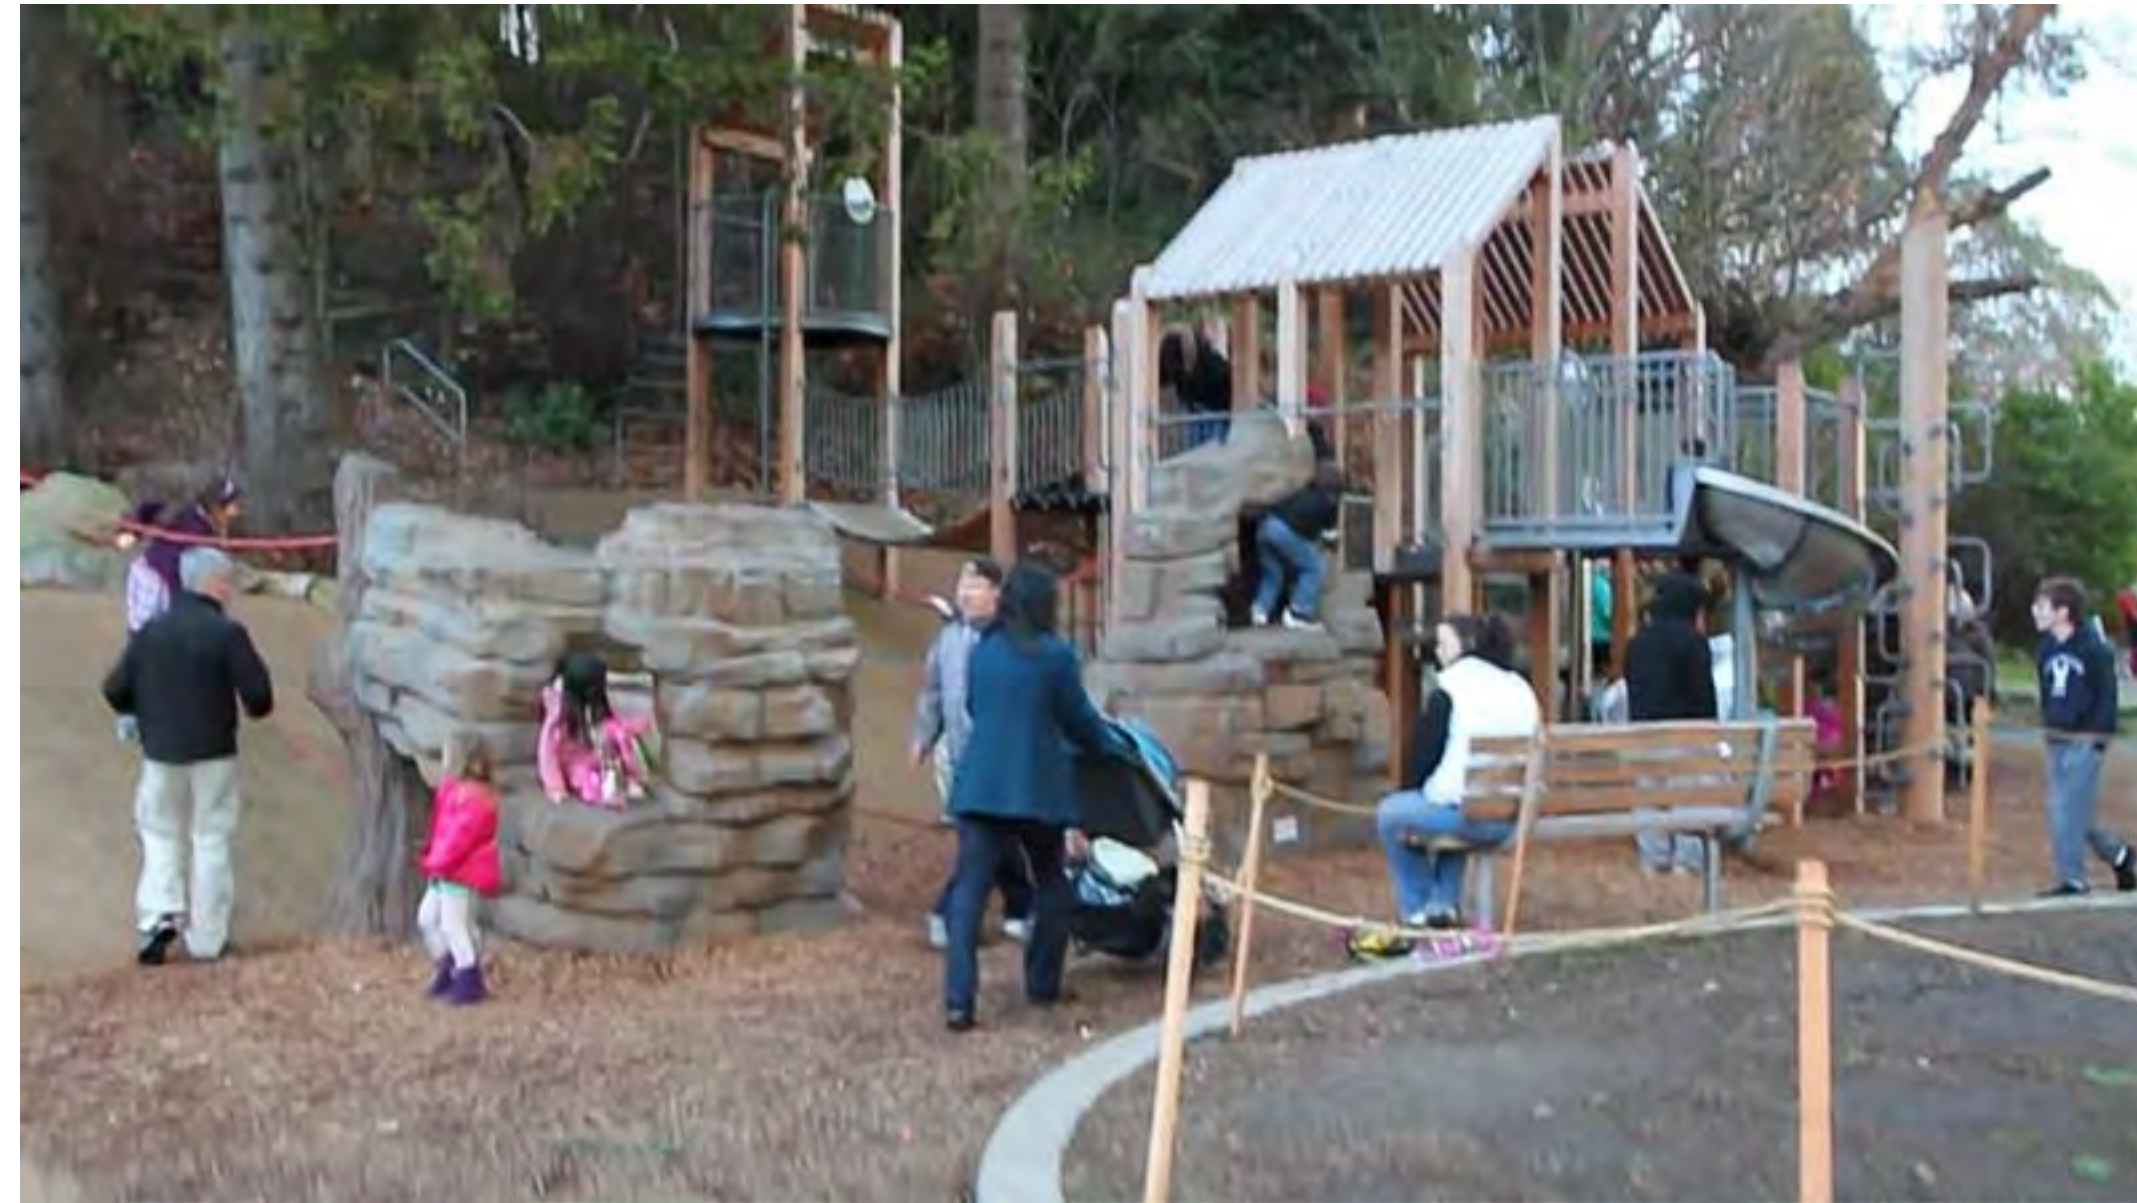

DBN+Flow



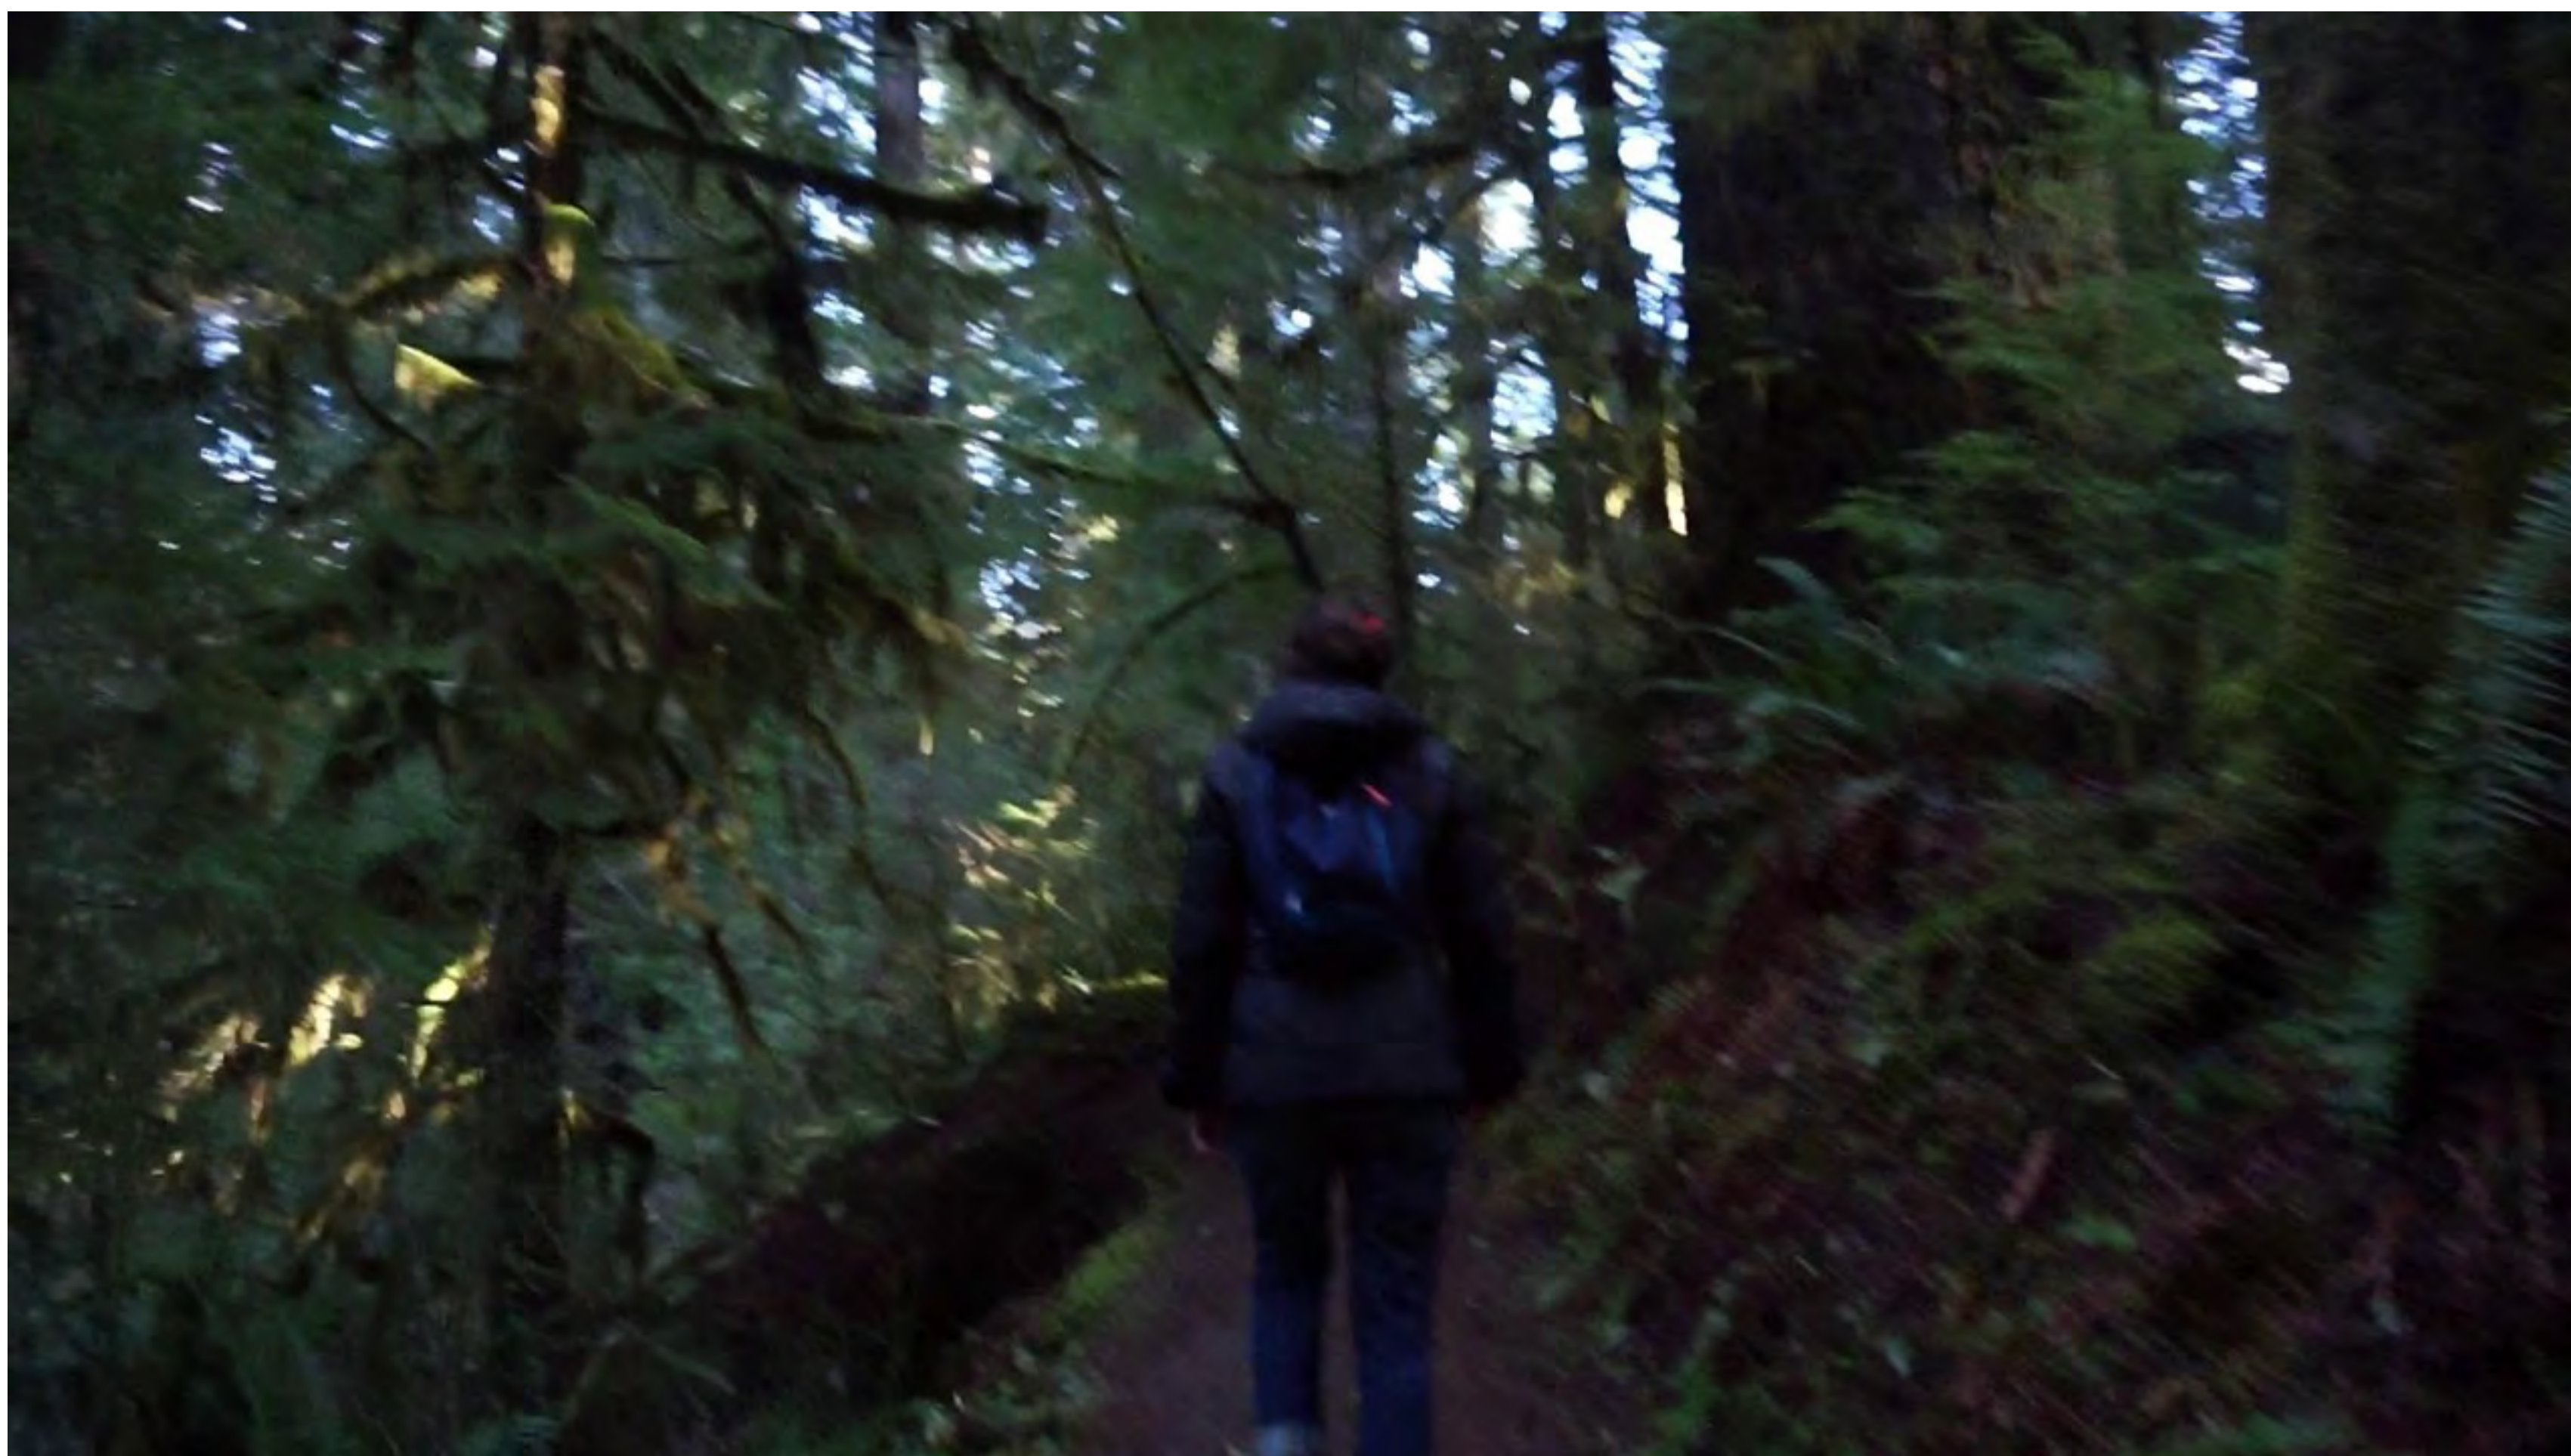

input



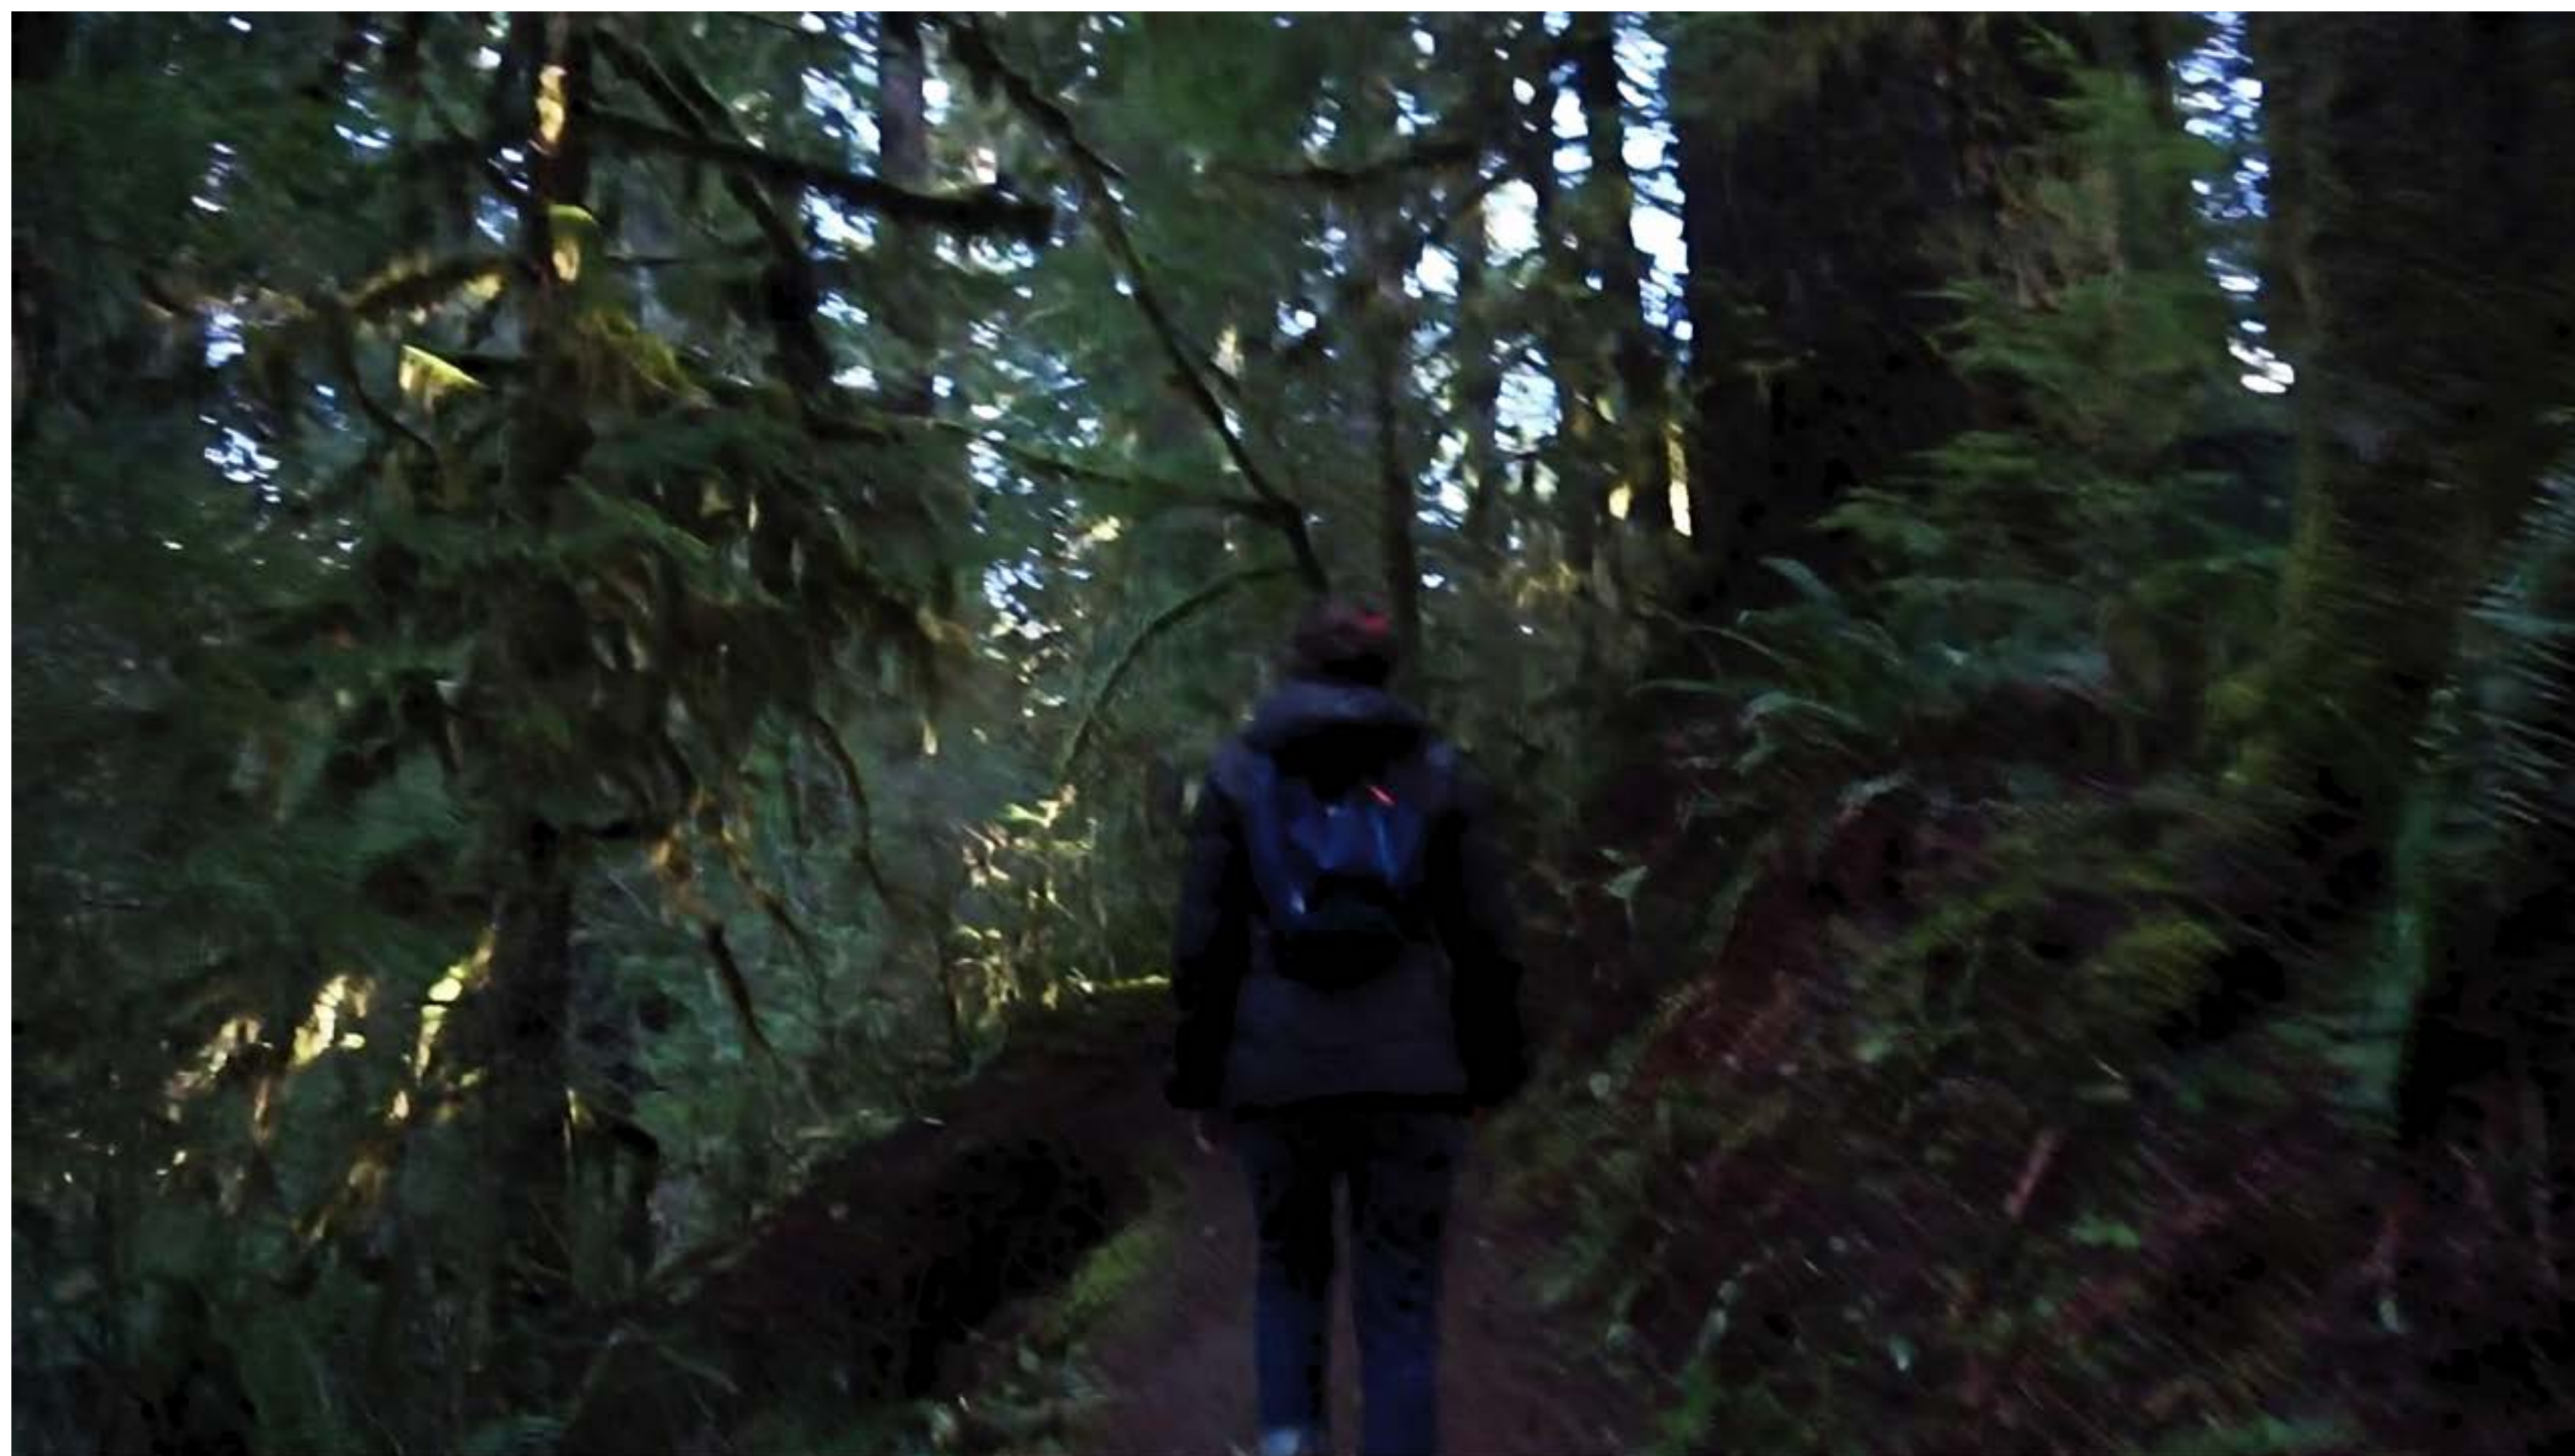

DBN+Noalign



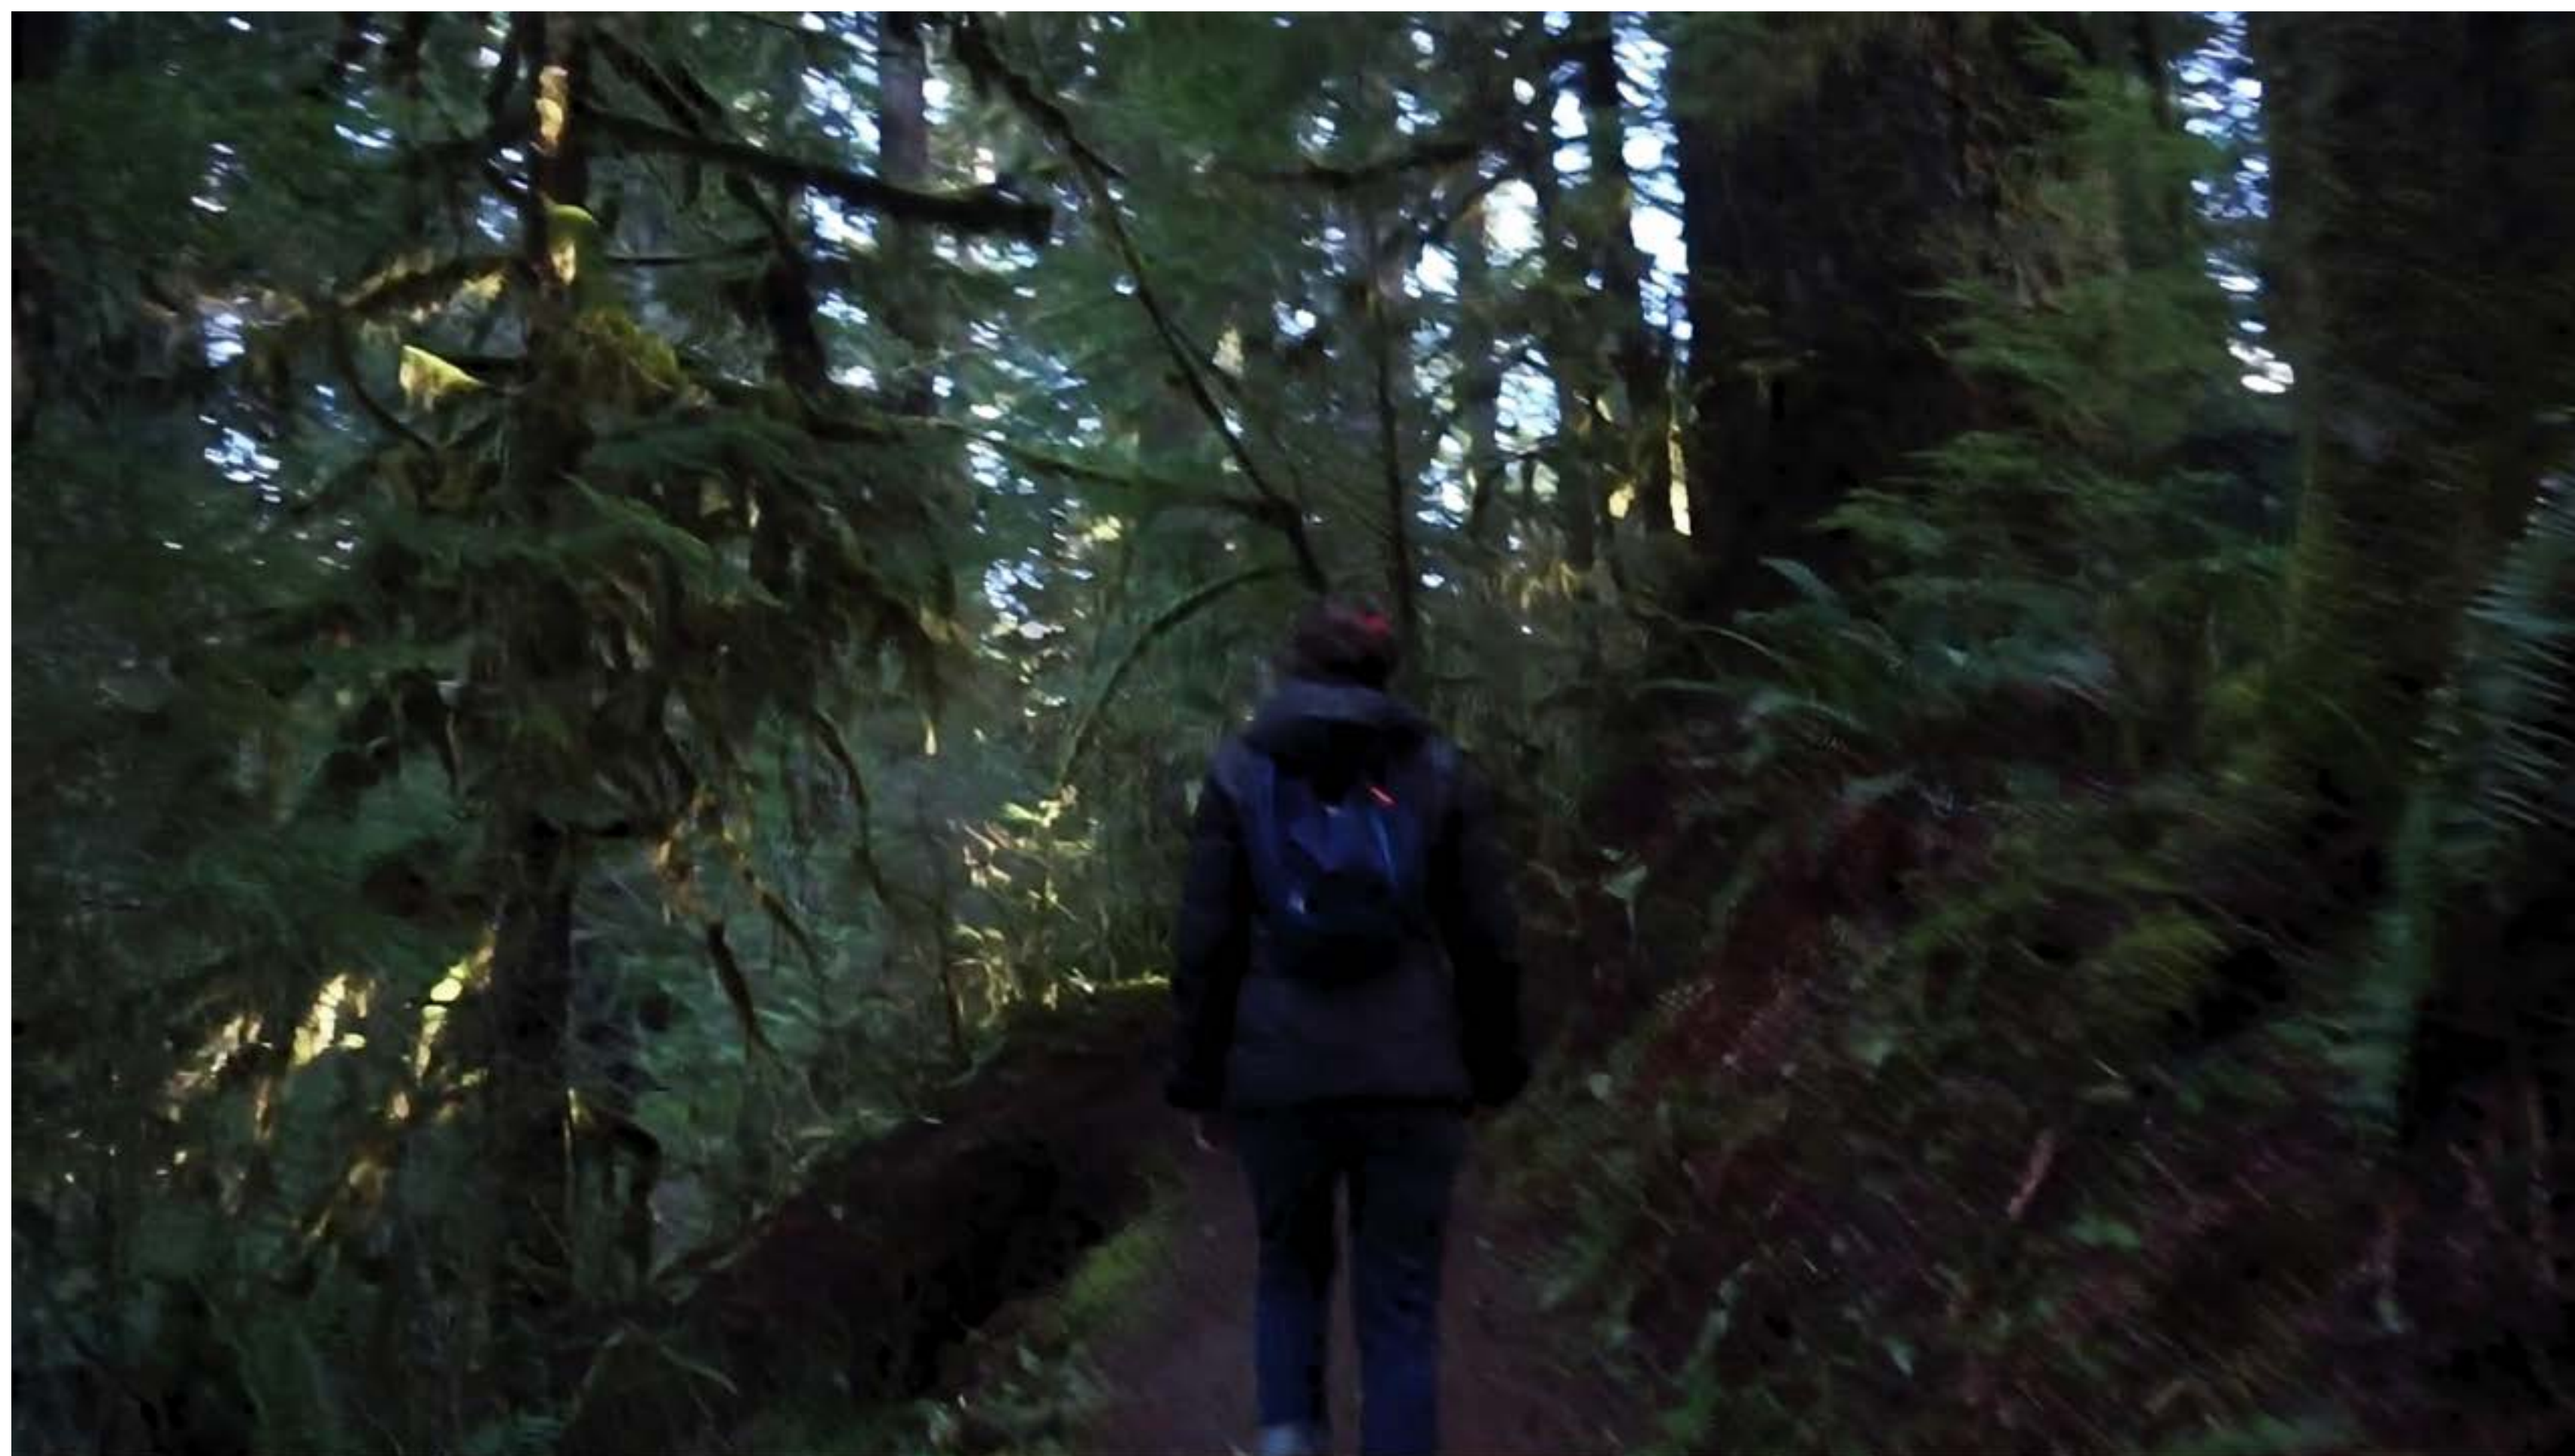

DBN+Homog



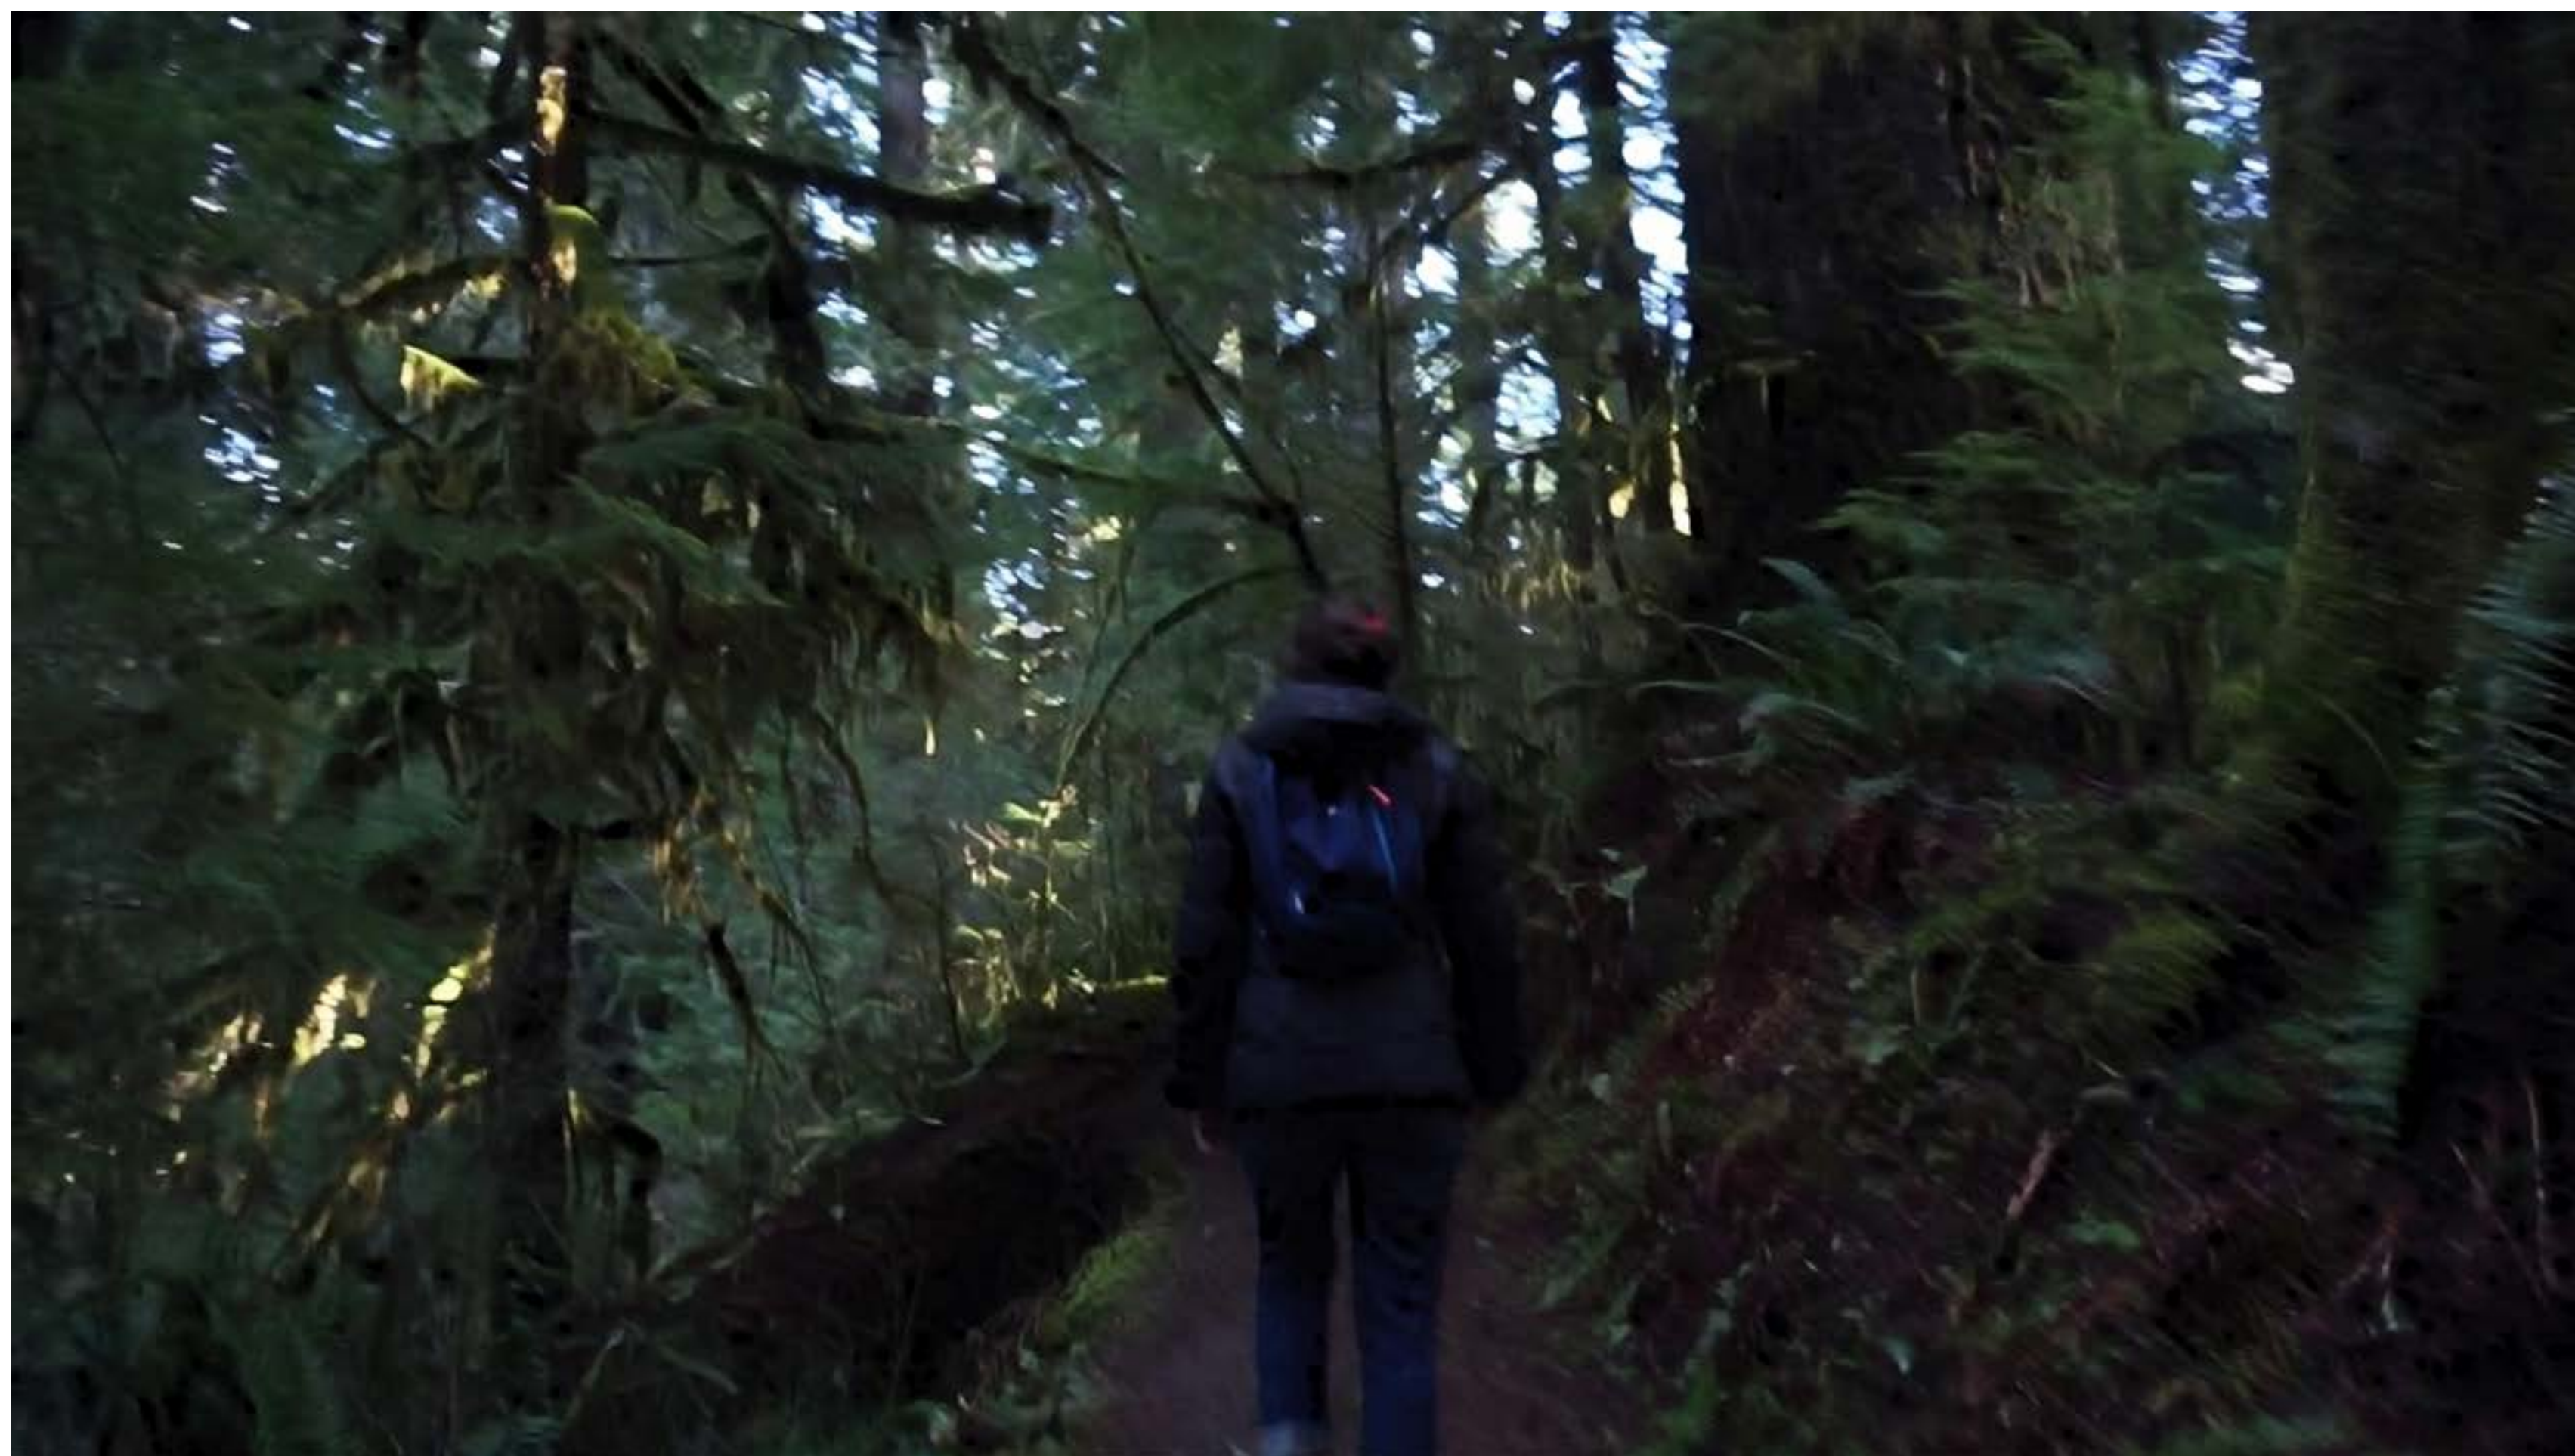

DBN+Flow



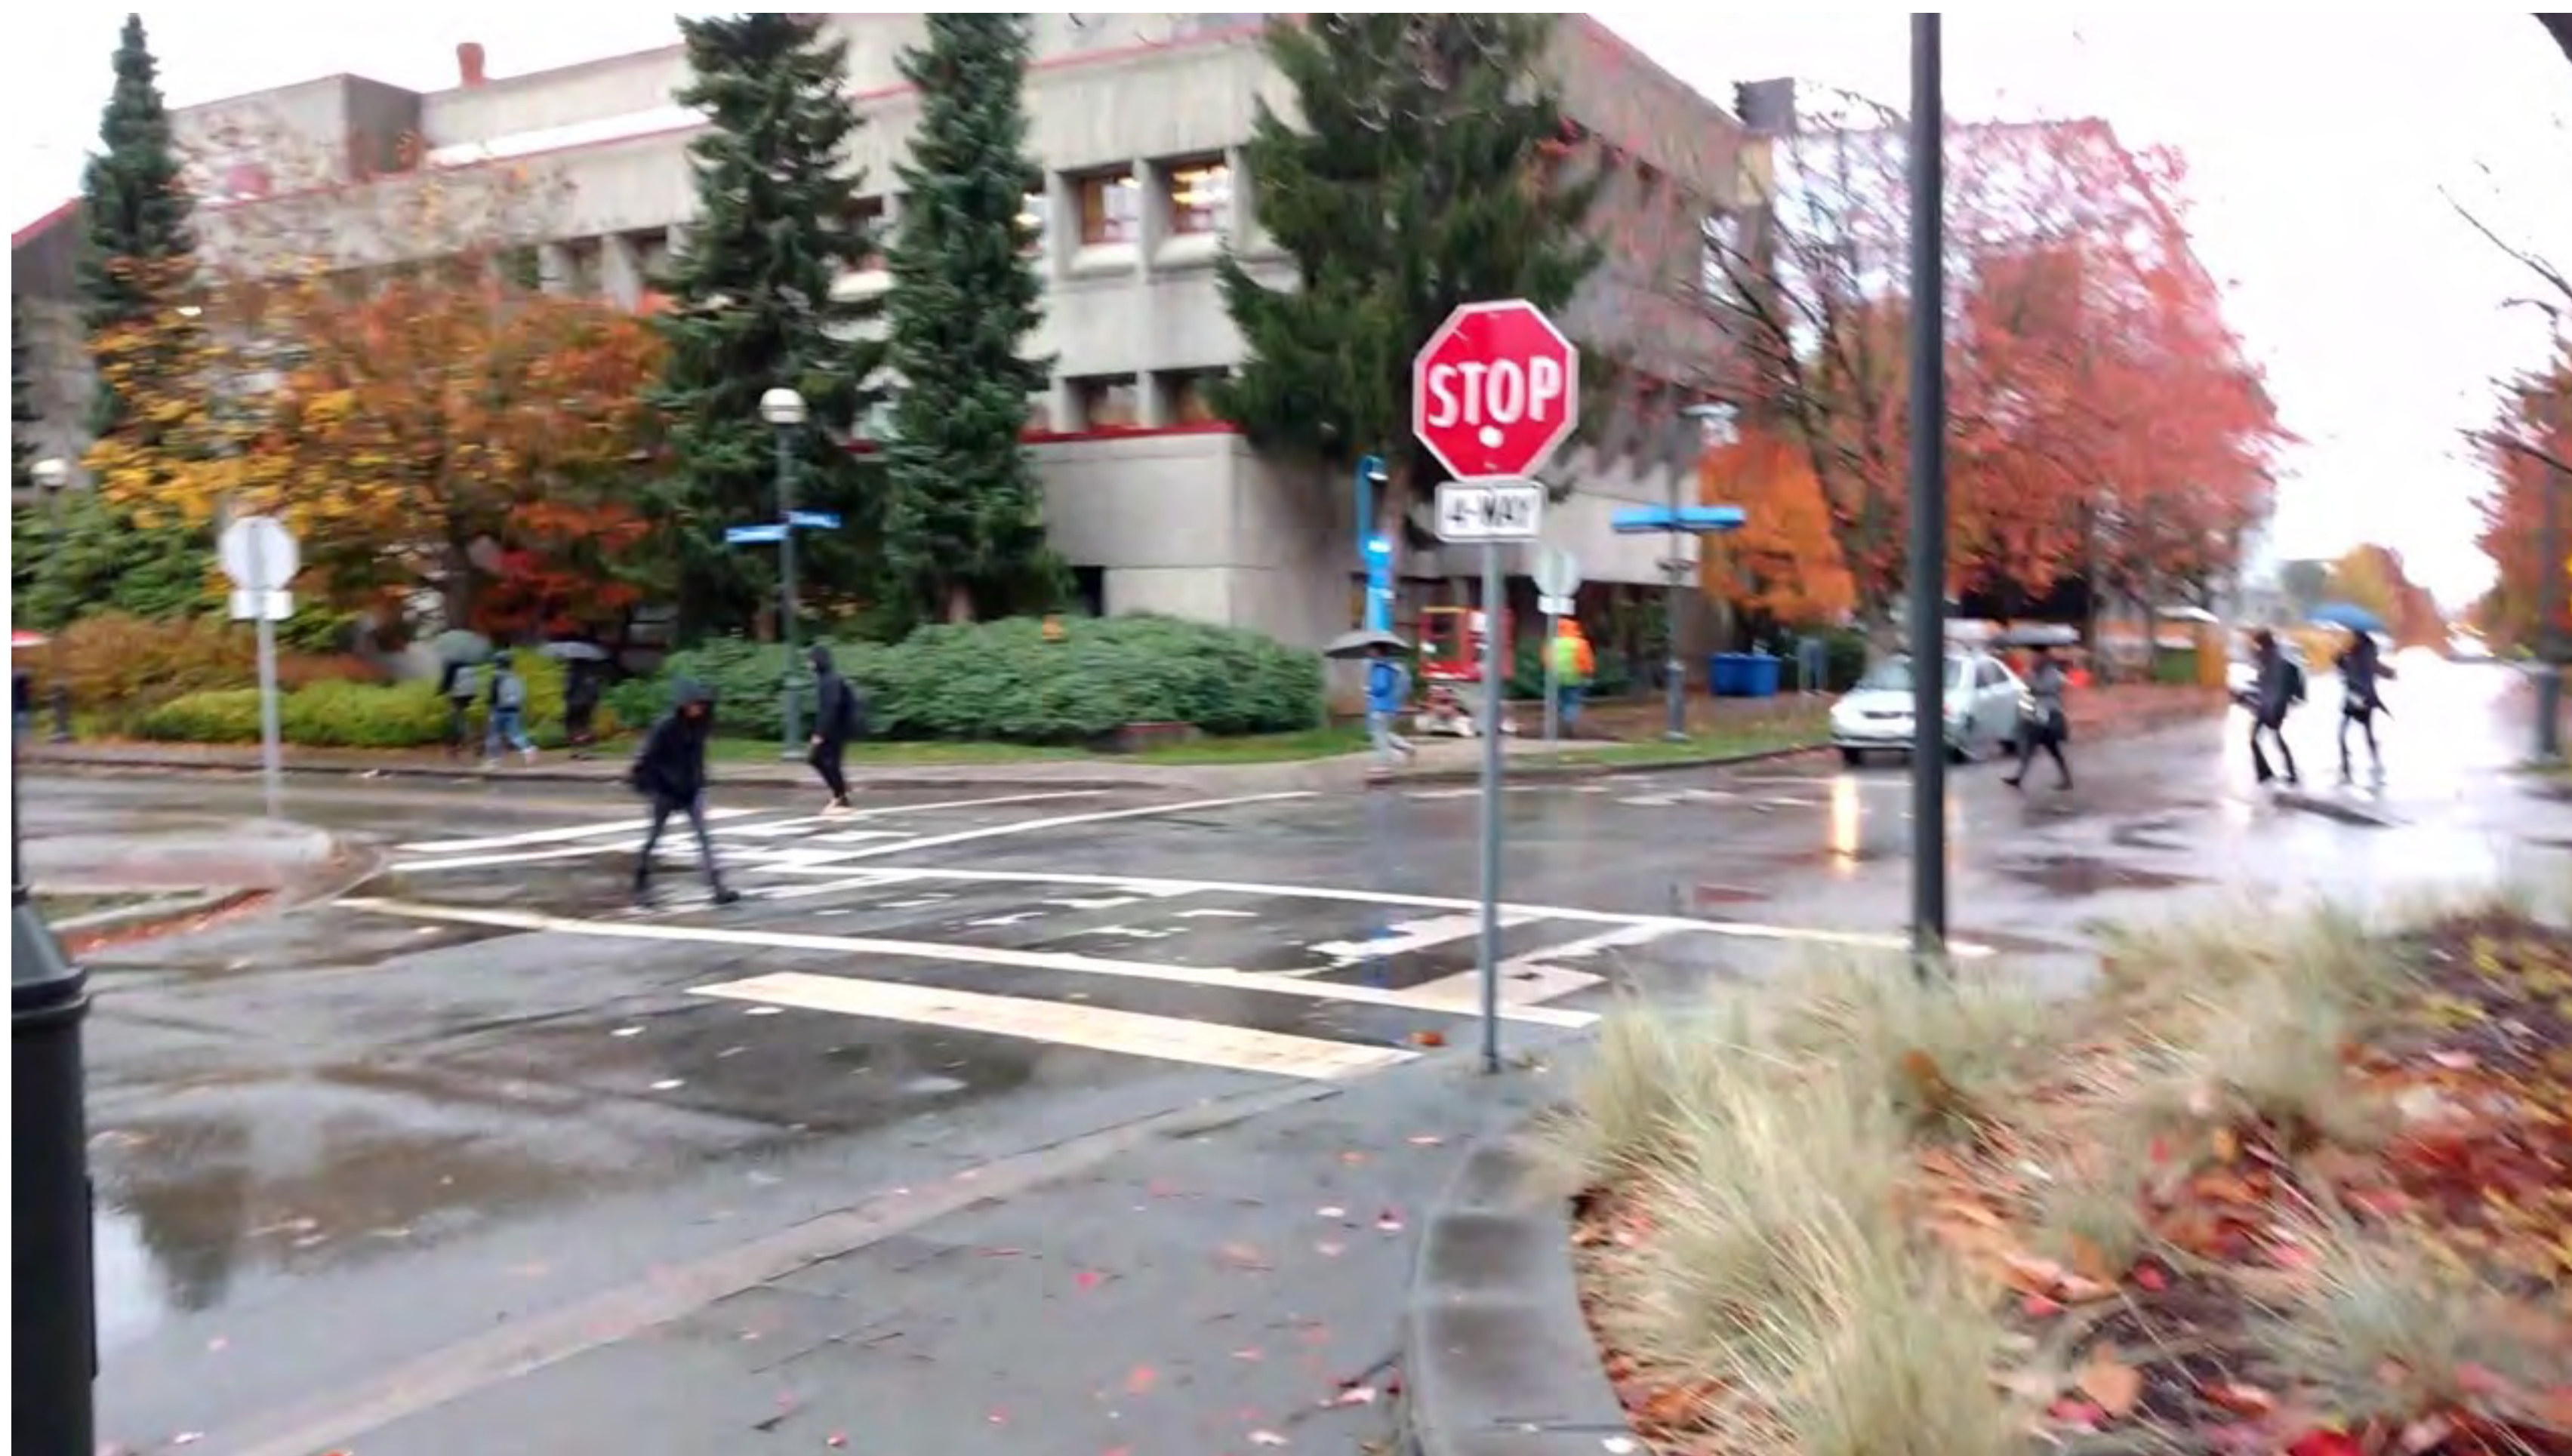

input



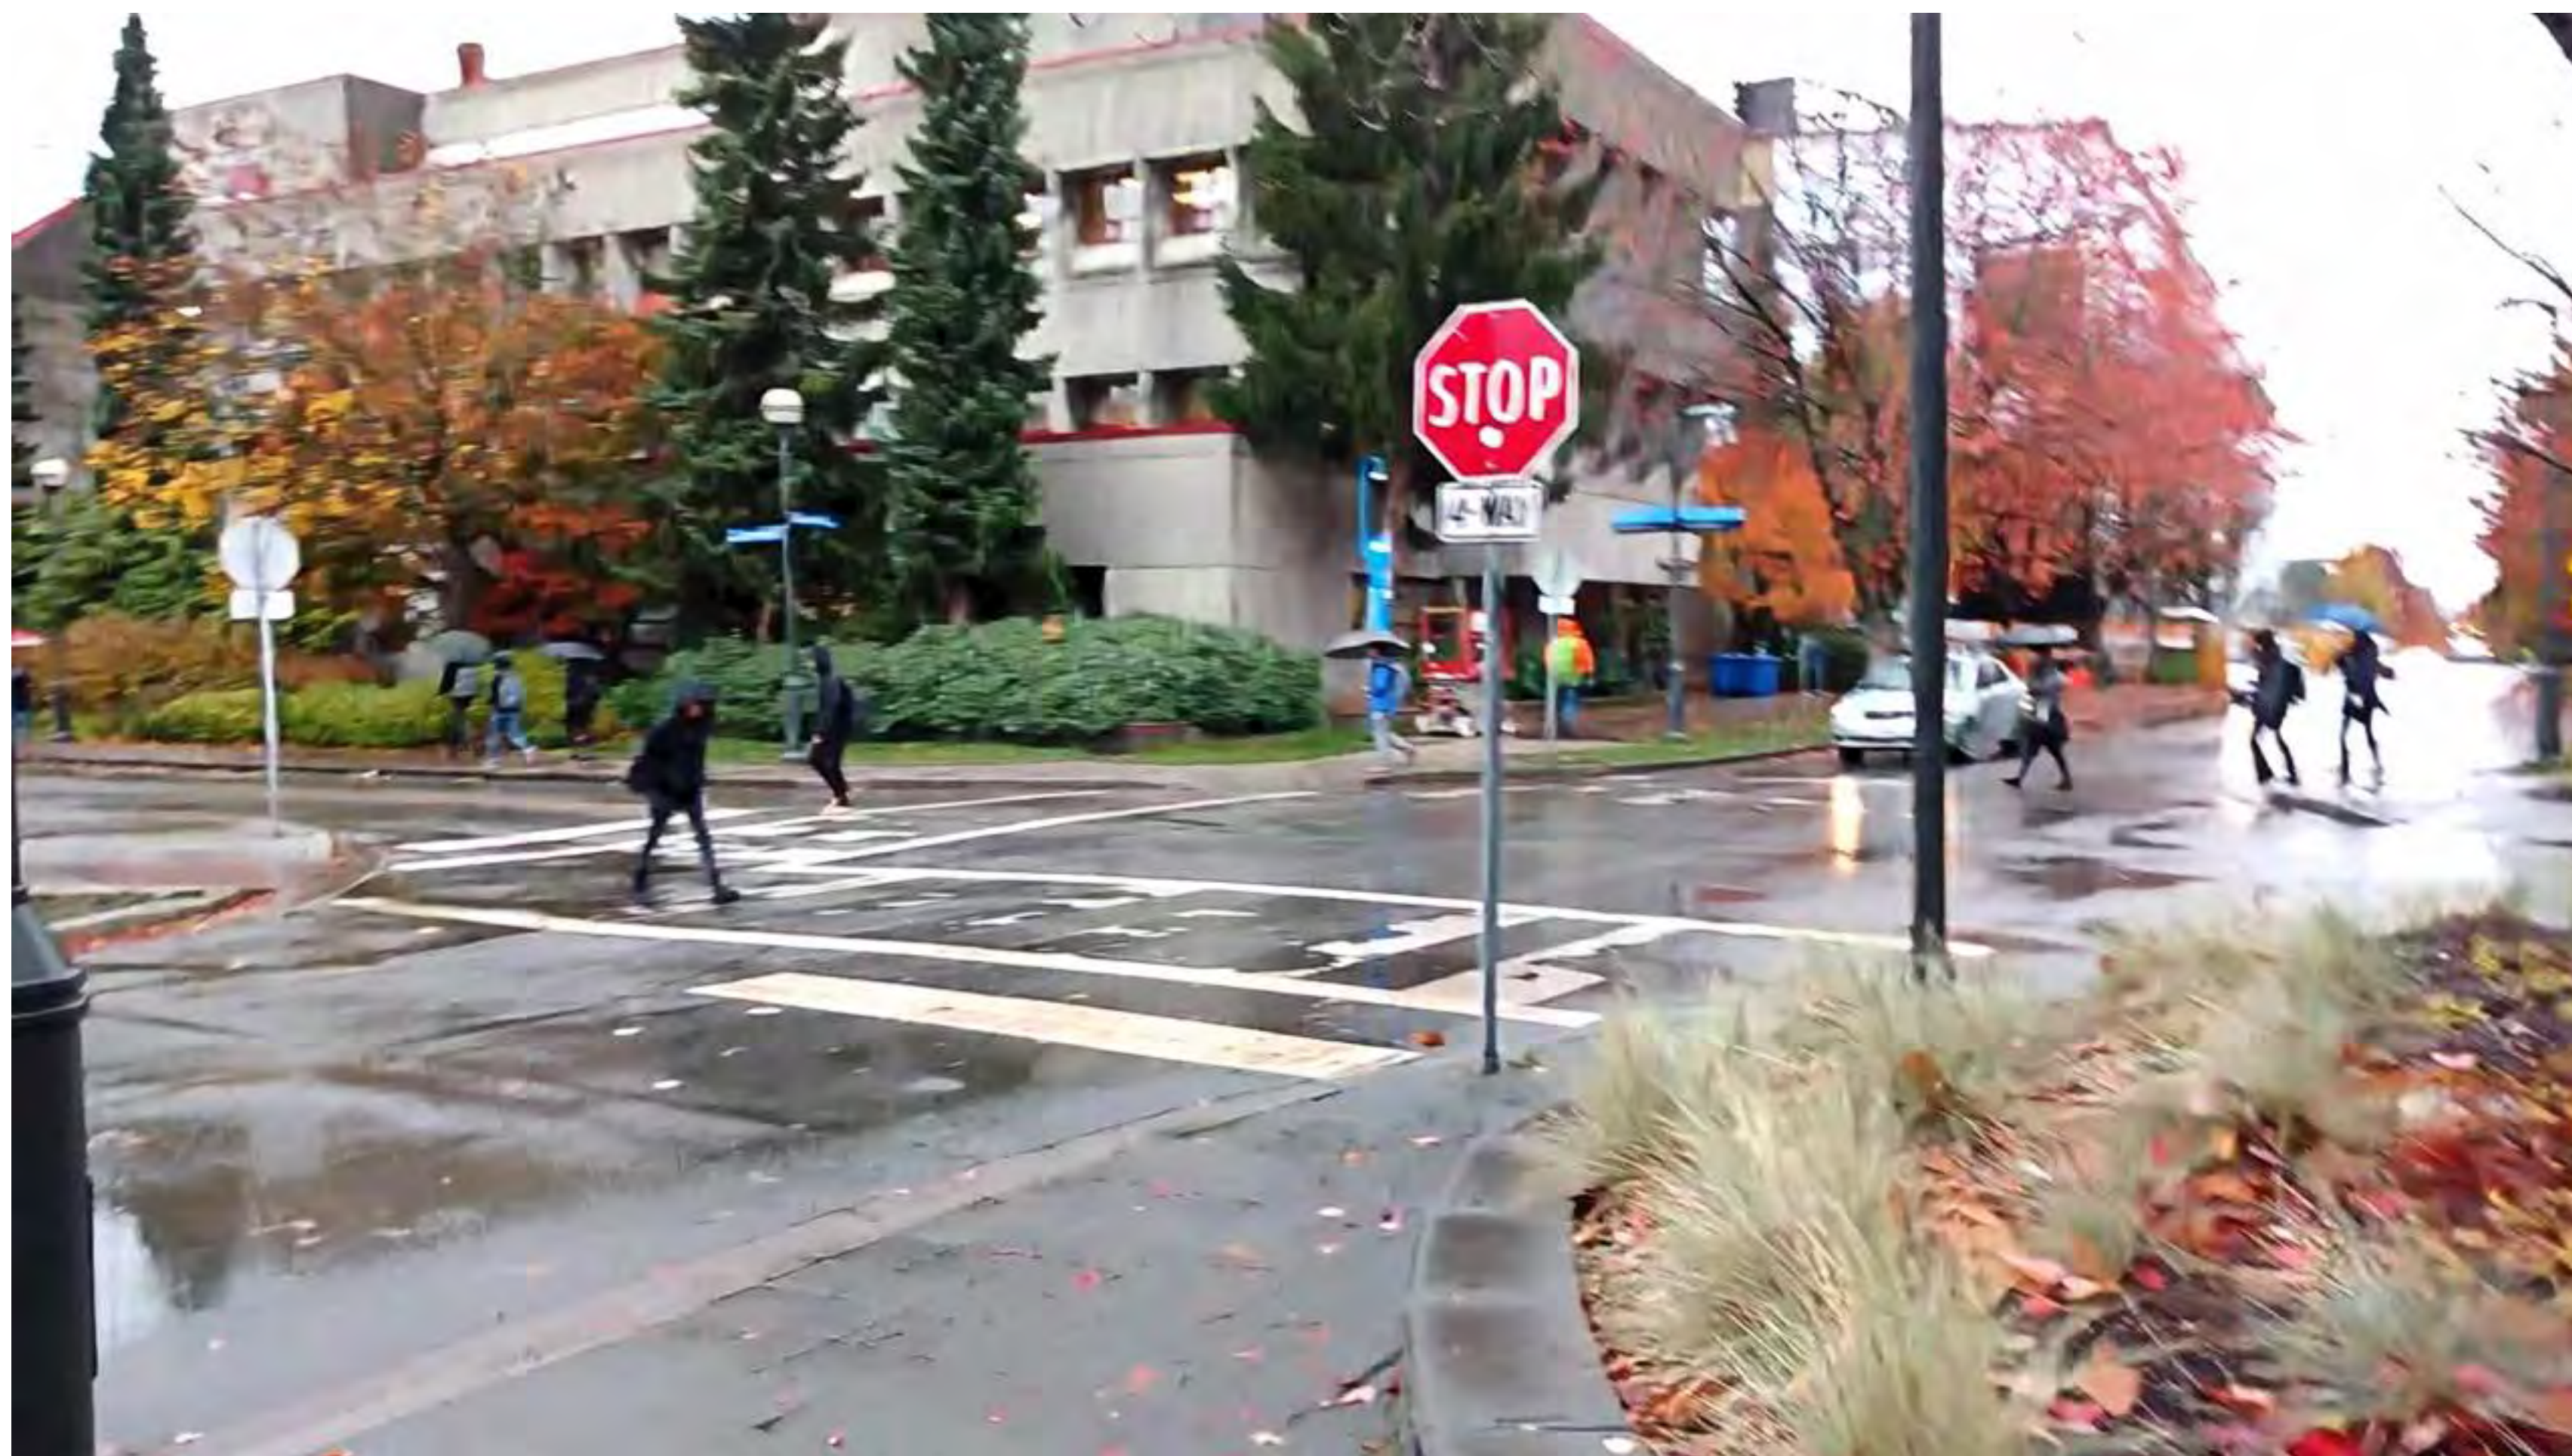

DBN+Noalign



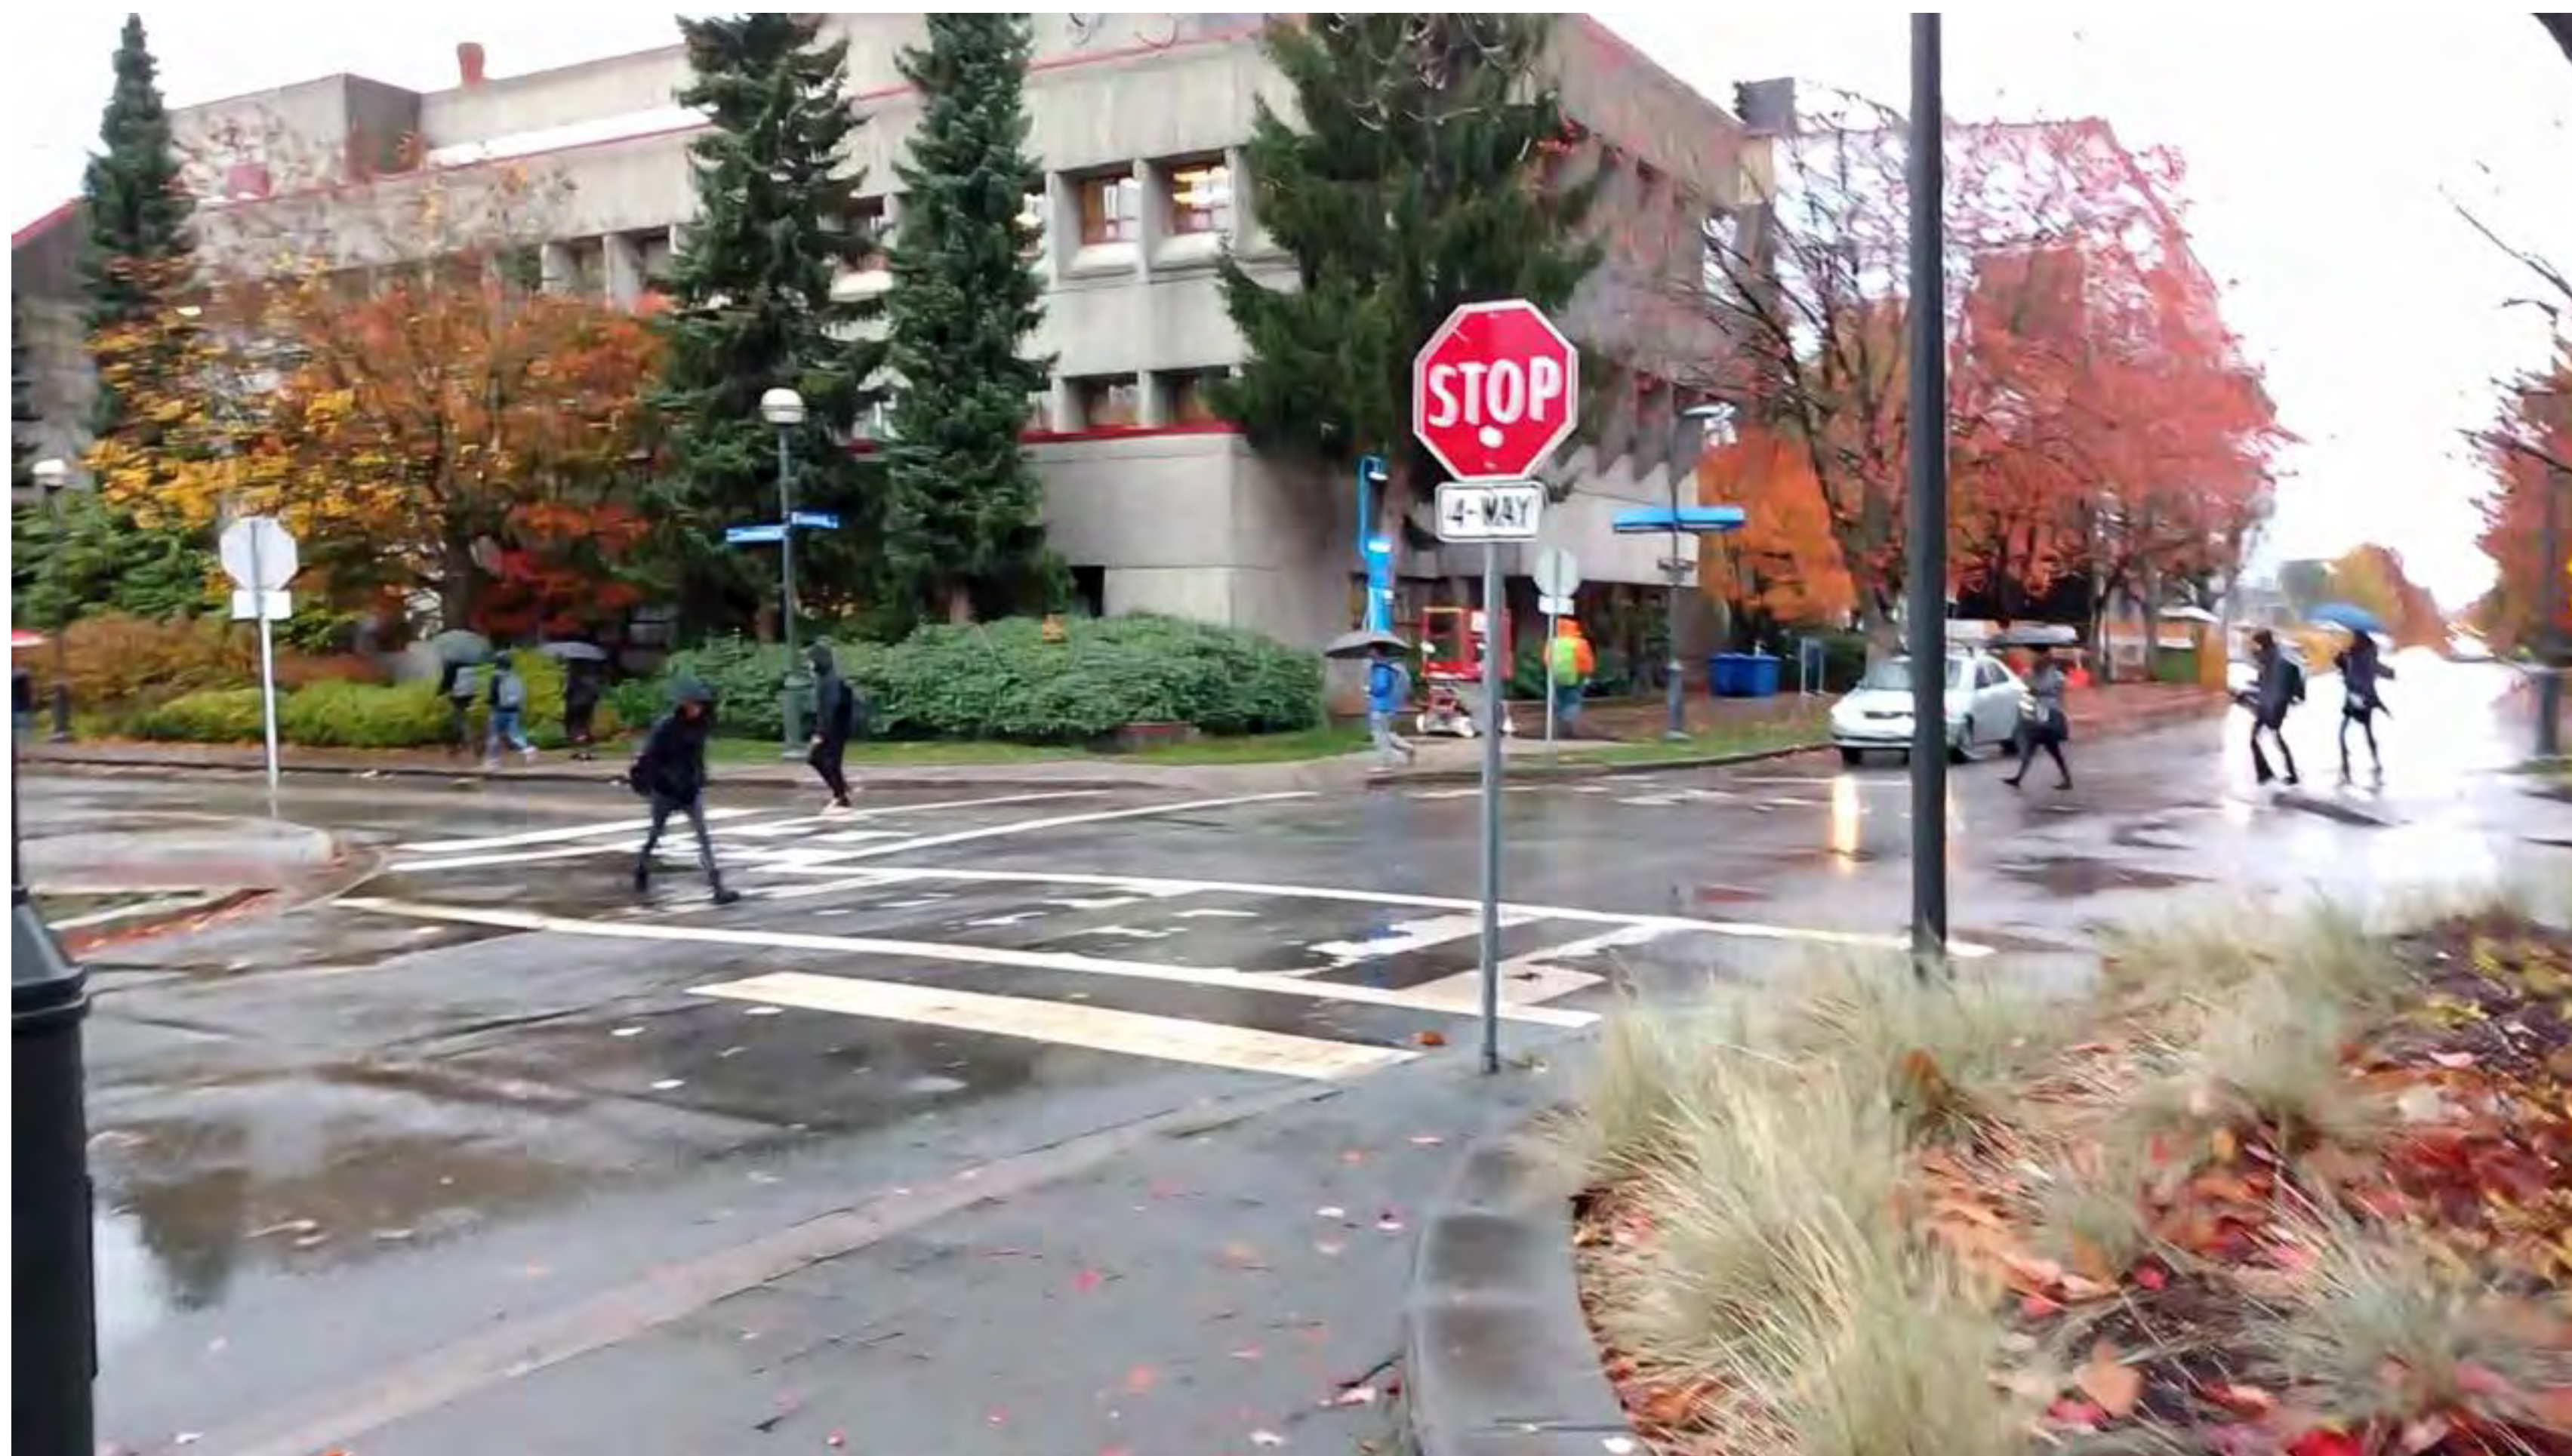

DBN+Homog



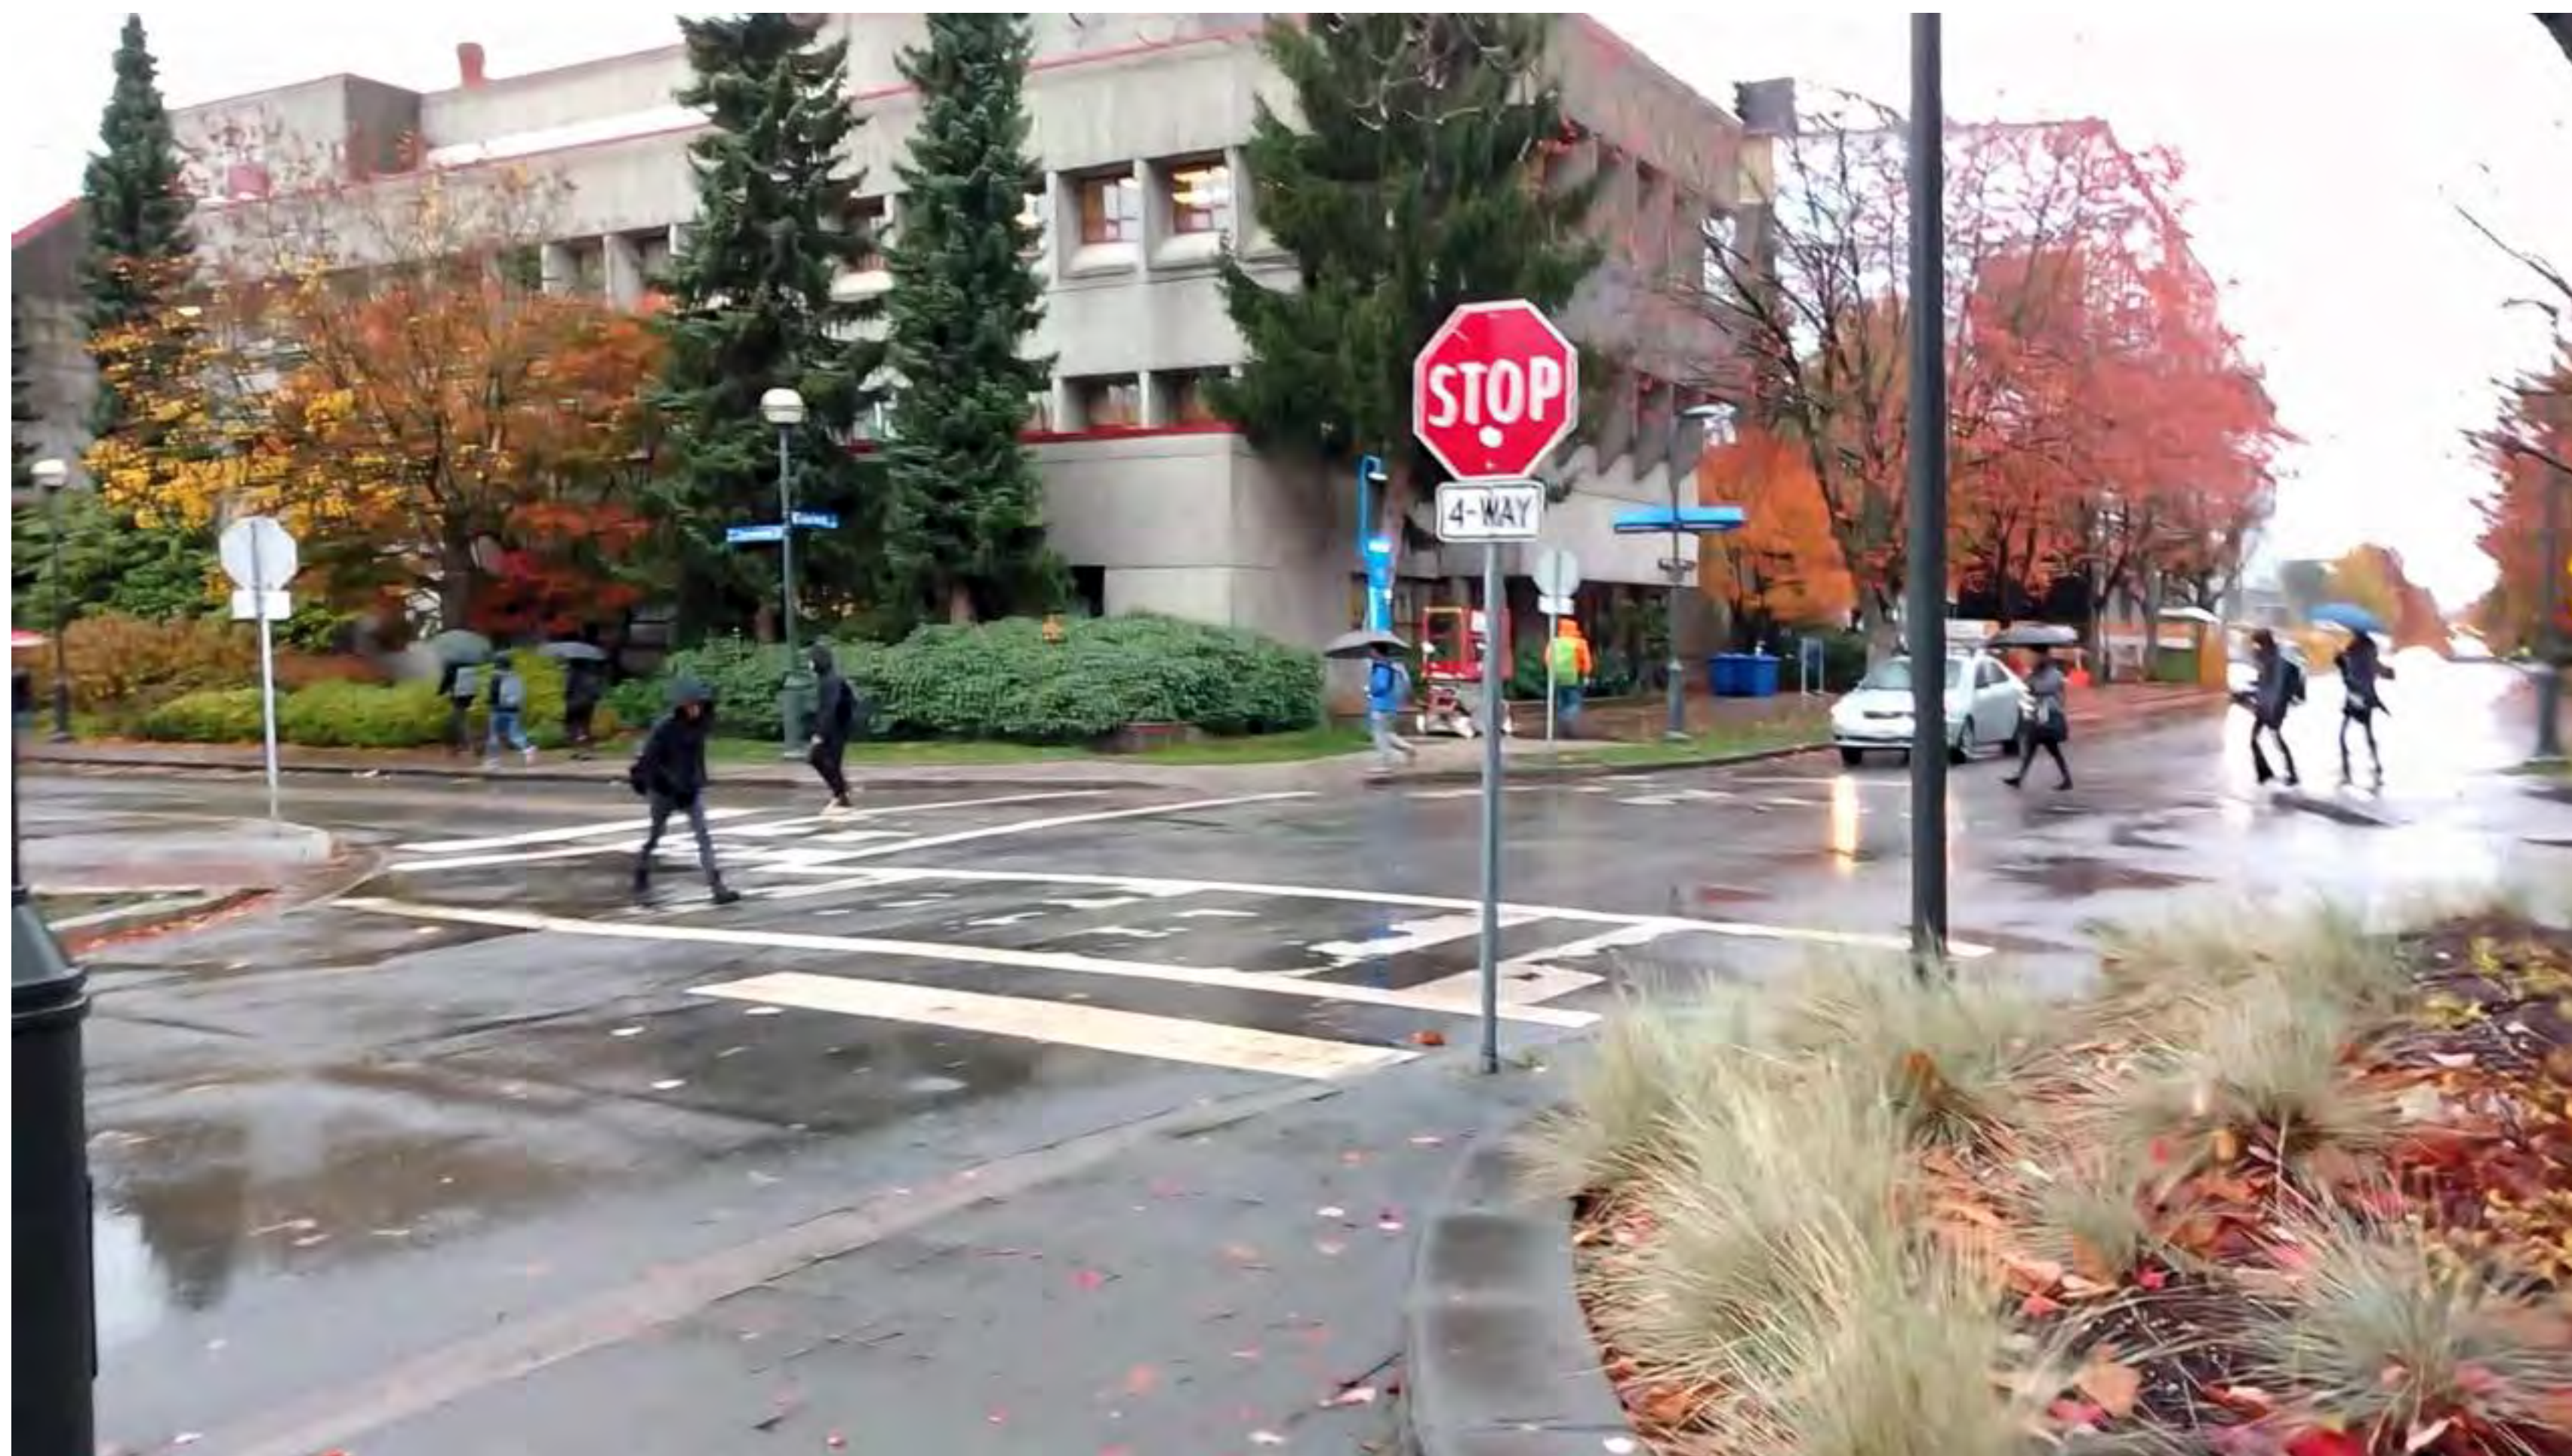

DBN+Flow



# Analysis on DeBlurNet



# Depth of DBN

- Here we compare DBN with a slightly shallower version, where D3 to F4\_3 are removed. The bottleneck layers in DBN greatly help with handling misalignment and aggregation.



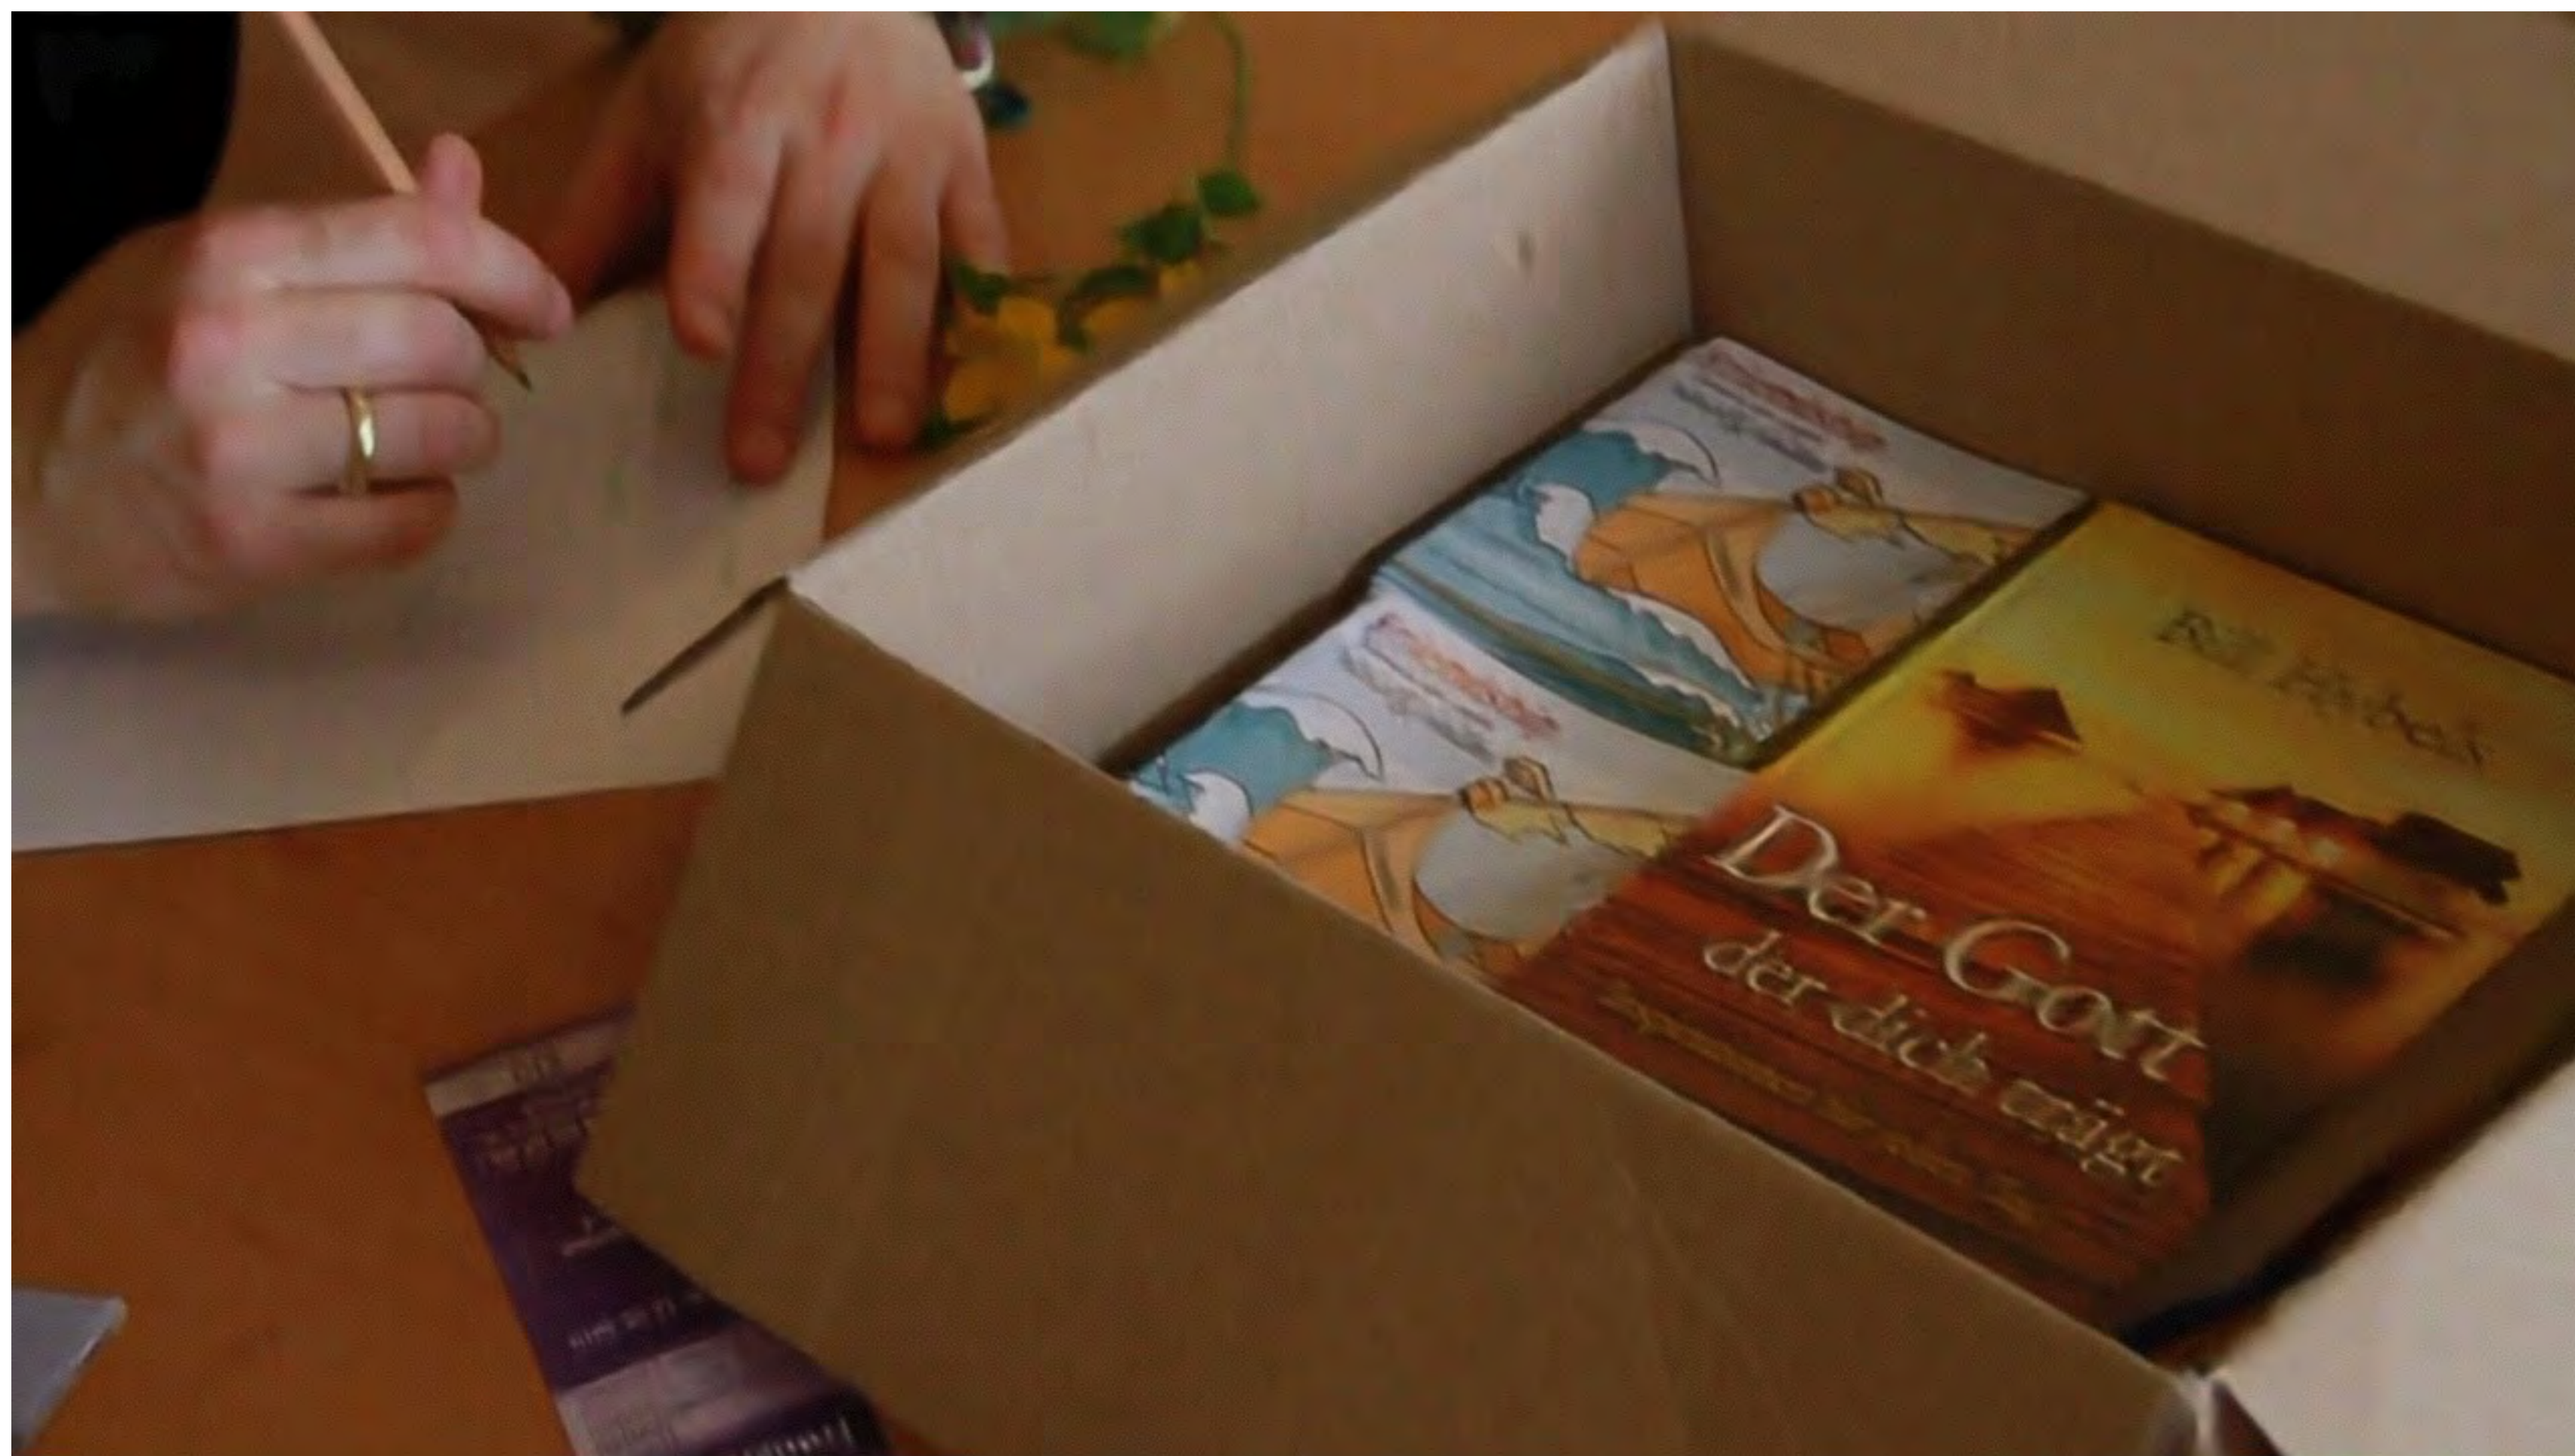

DBN-Shallower+Flow





DBN+Flow



# Late v.s. Early Fusion

- Here we compare different fusion strategies. While late fusion occasionally helps with challenging cases where DBN+Noalign fails, this improvement is not consistent. This might be related to the failure of artifacts/misalignments detections without the presence of reference frame.



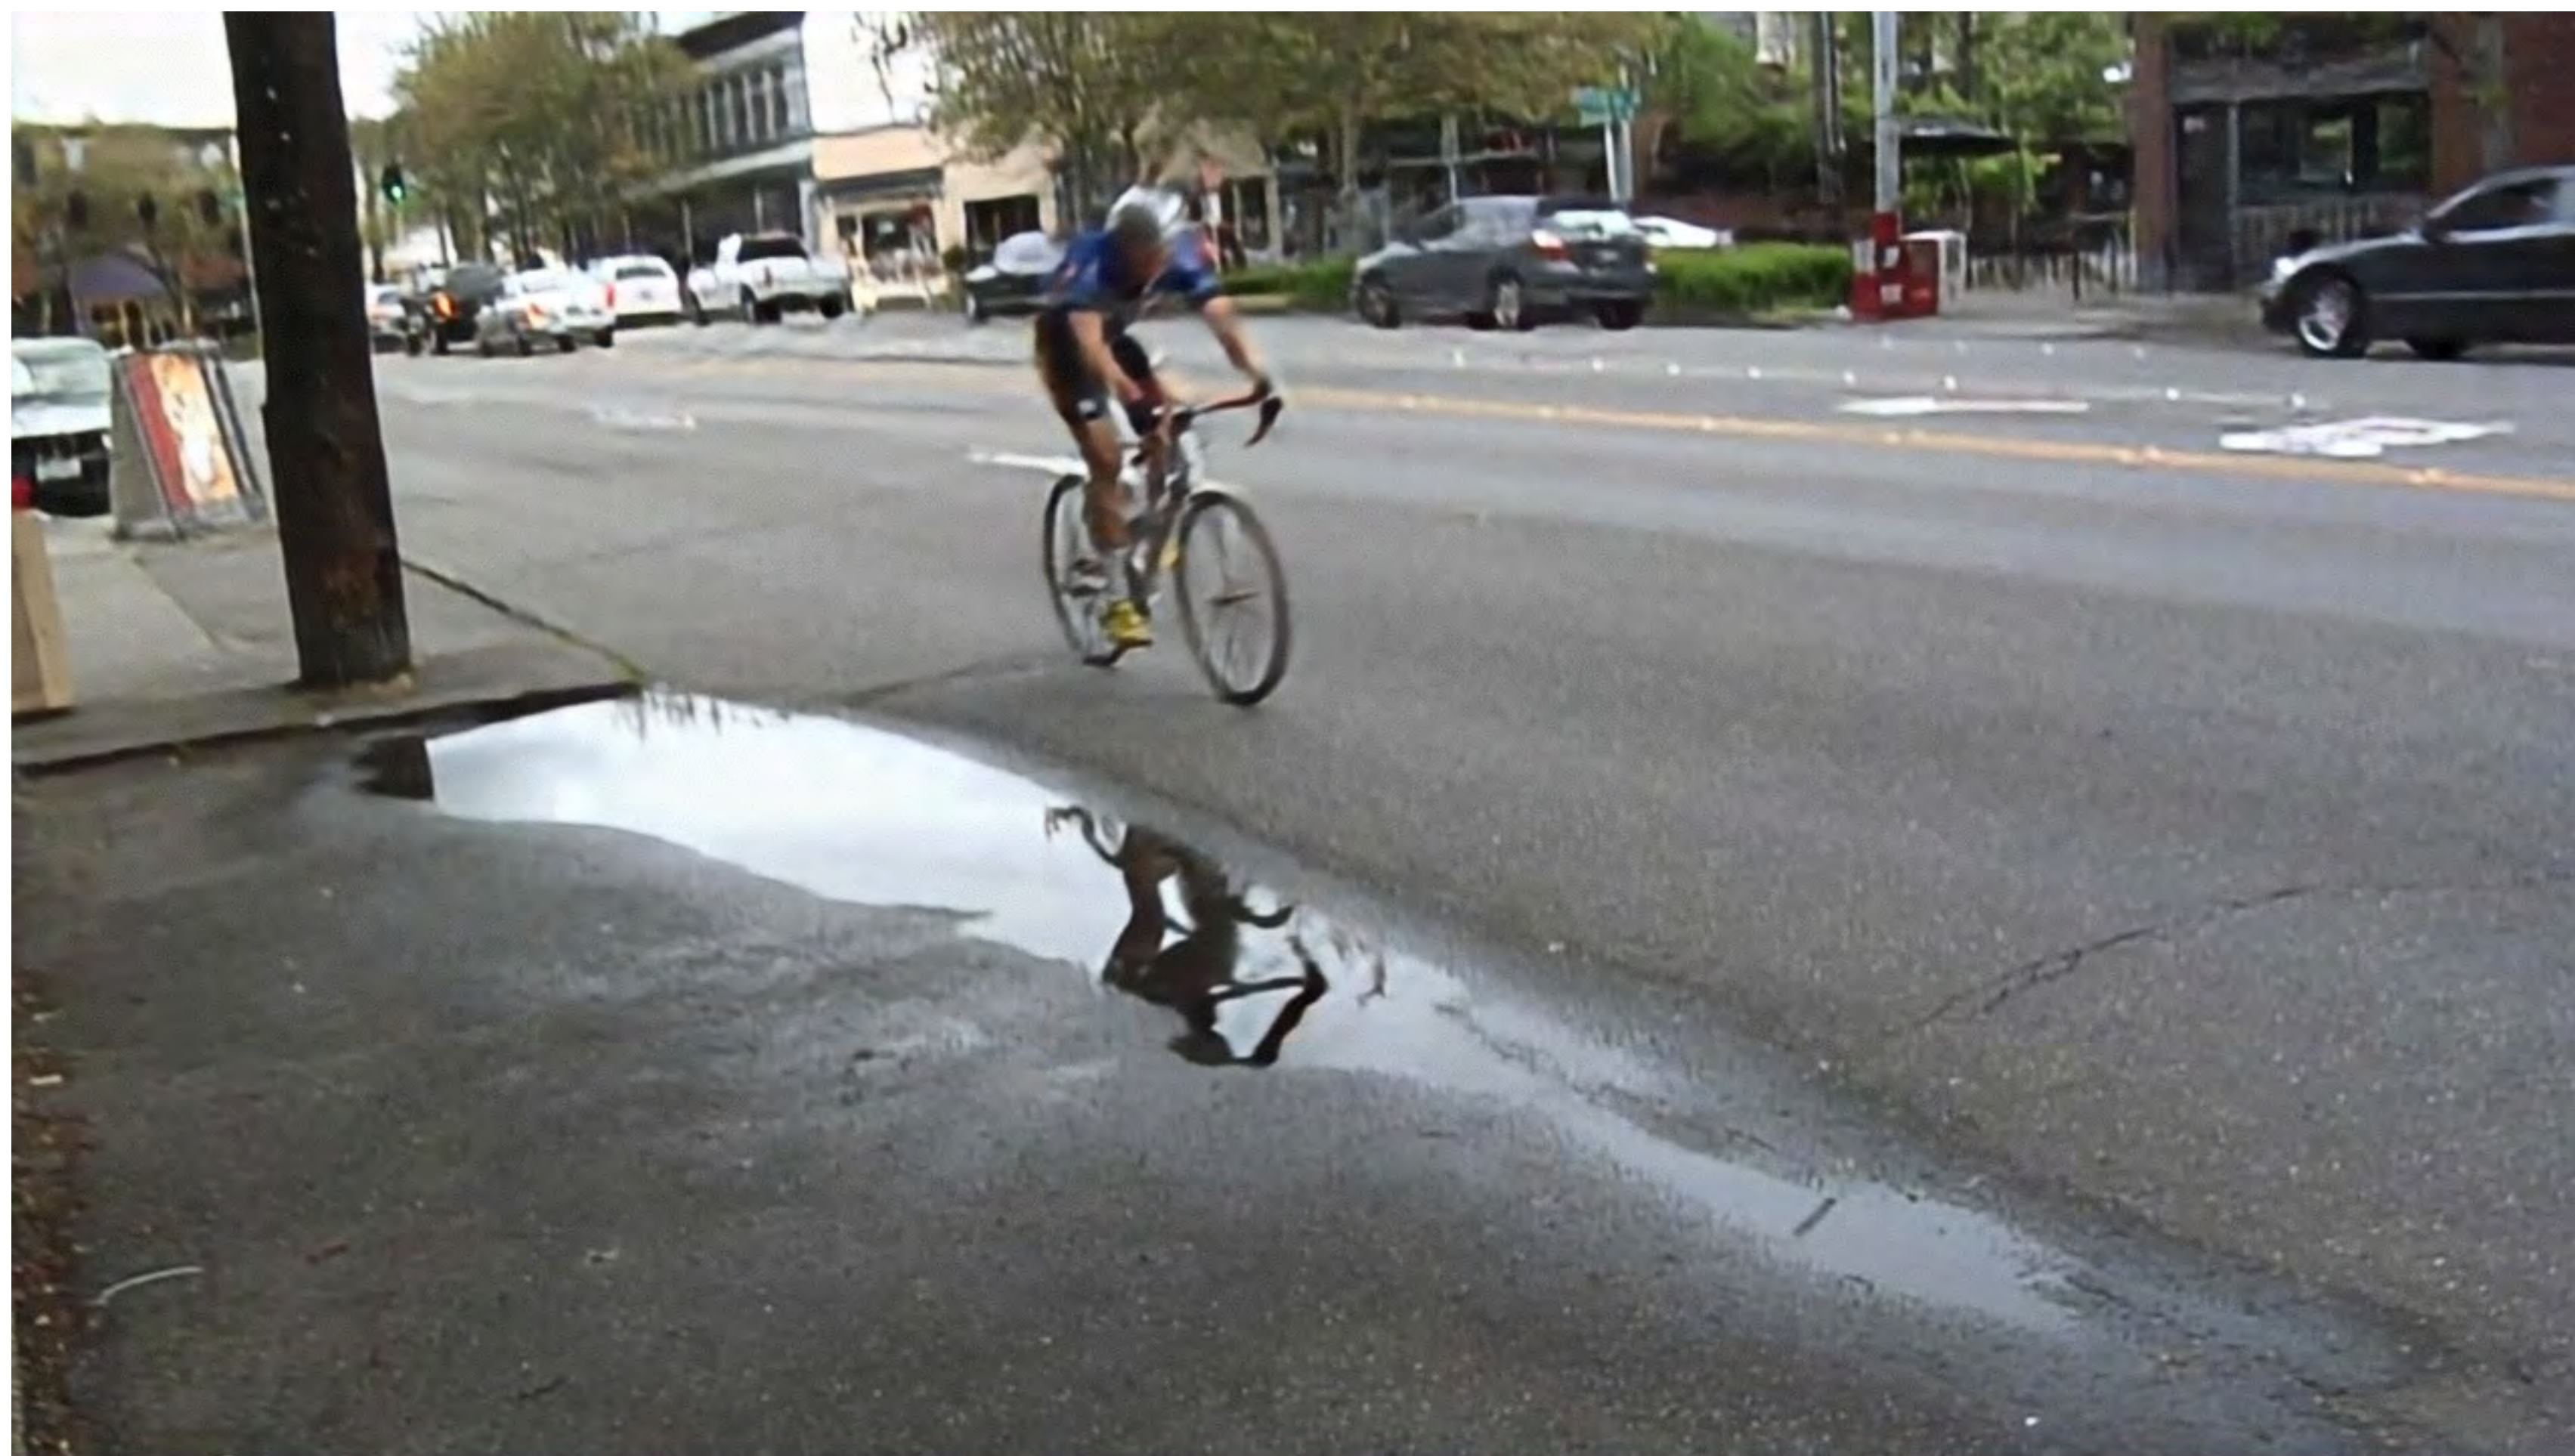

DBN-LateFusion+Noalign



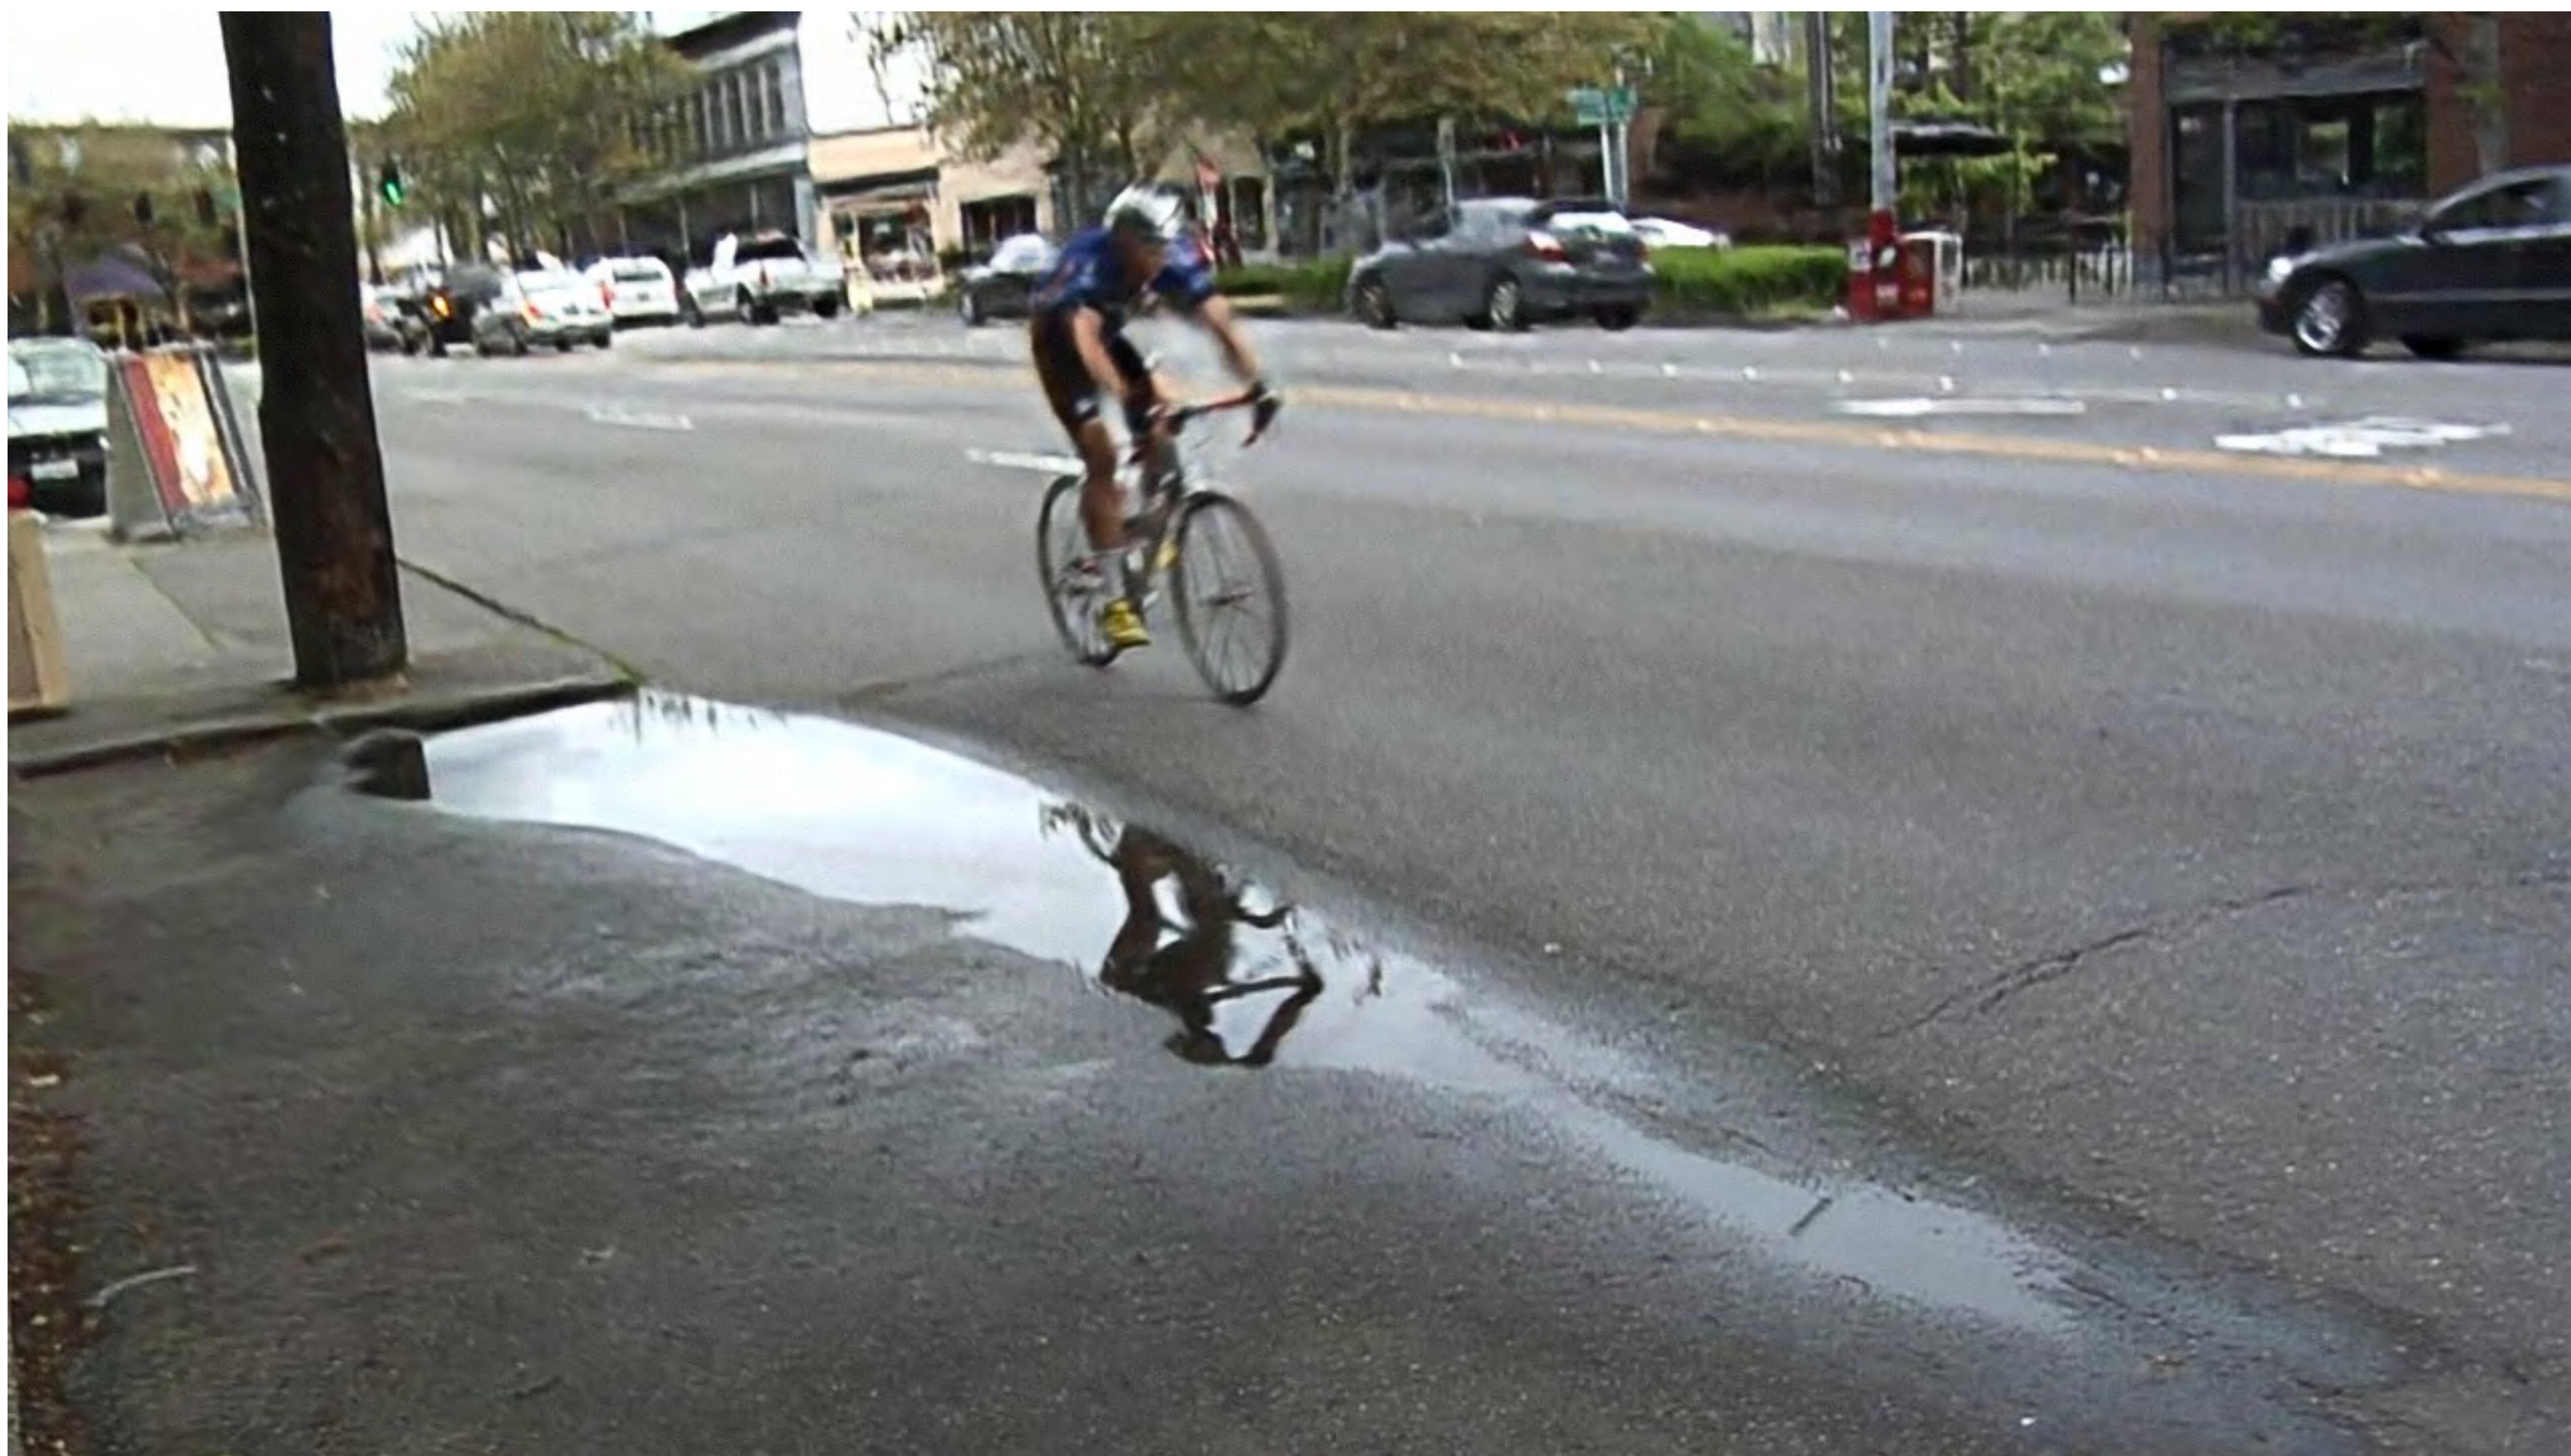

DBN+Noalign



# Visualization of Filters Learned

- Here we visualize some filters learned from DBN, specifically at F0. It can be observed that DBN not only learns to locate the corresponding color channels in the input stack, but is also able to learn to extract edges of different orientations, and to locate the warping artifacts.



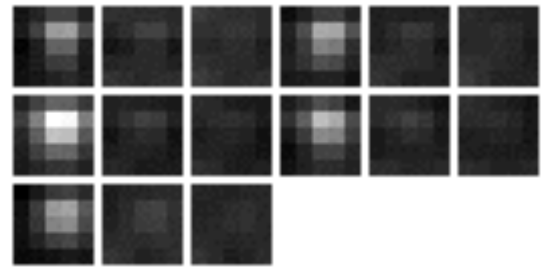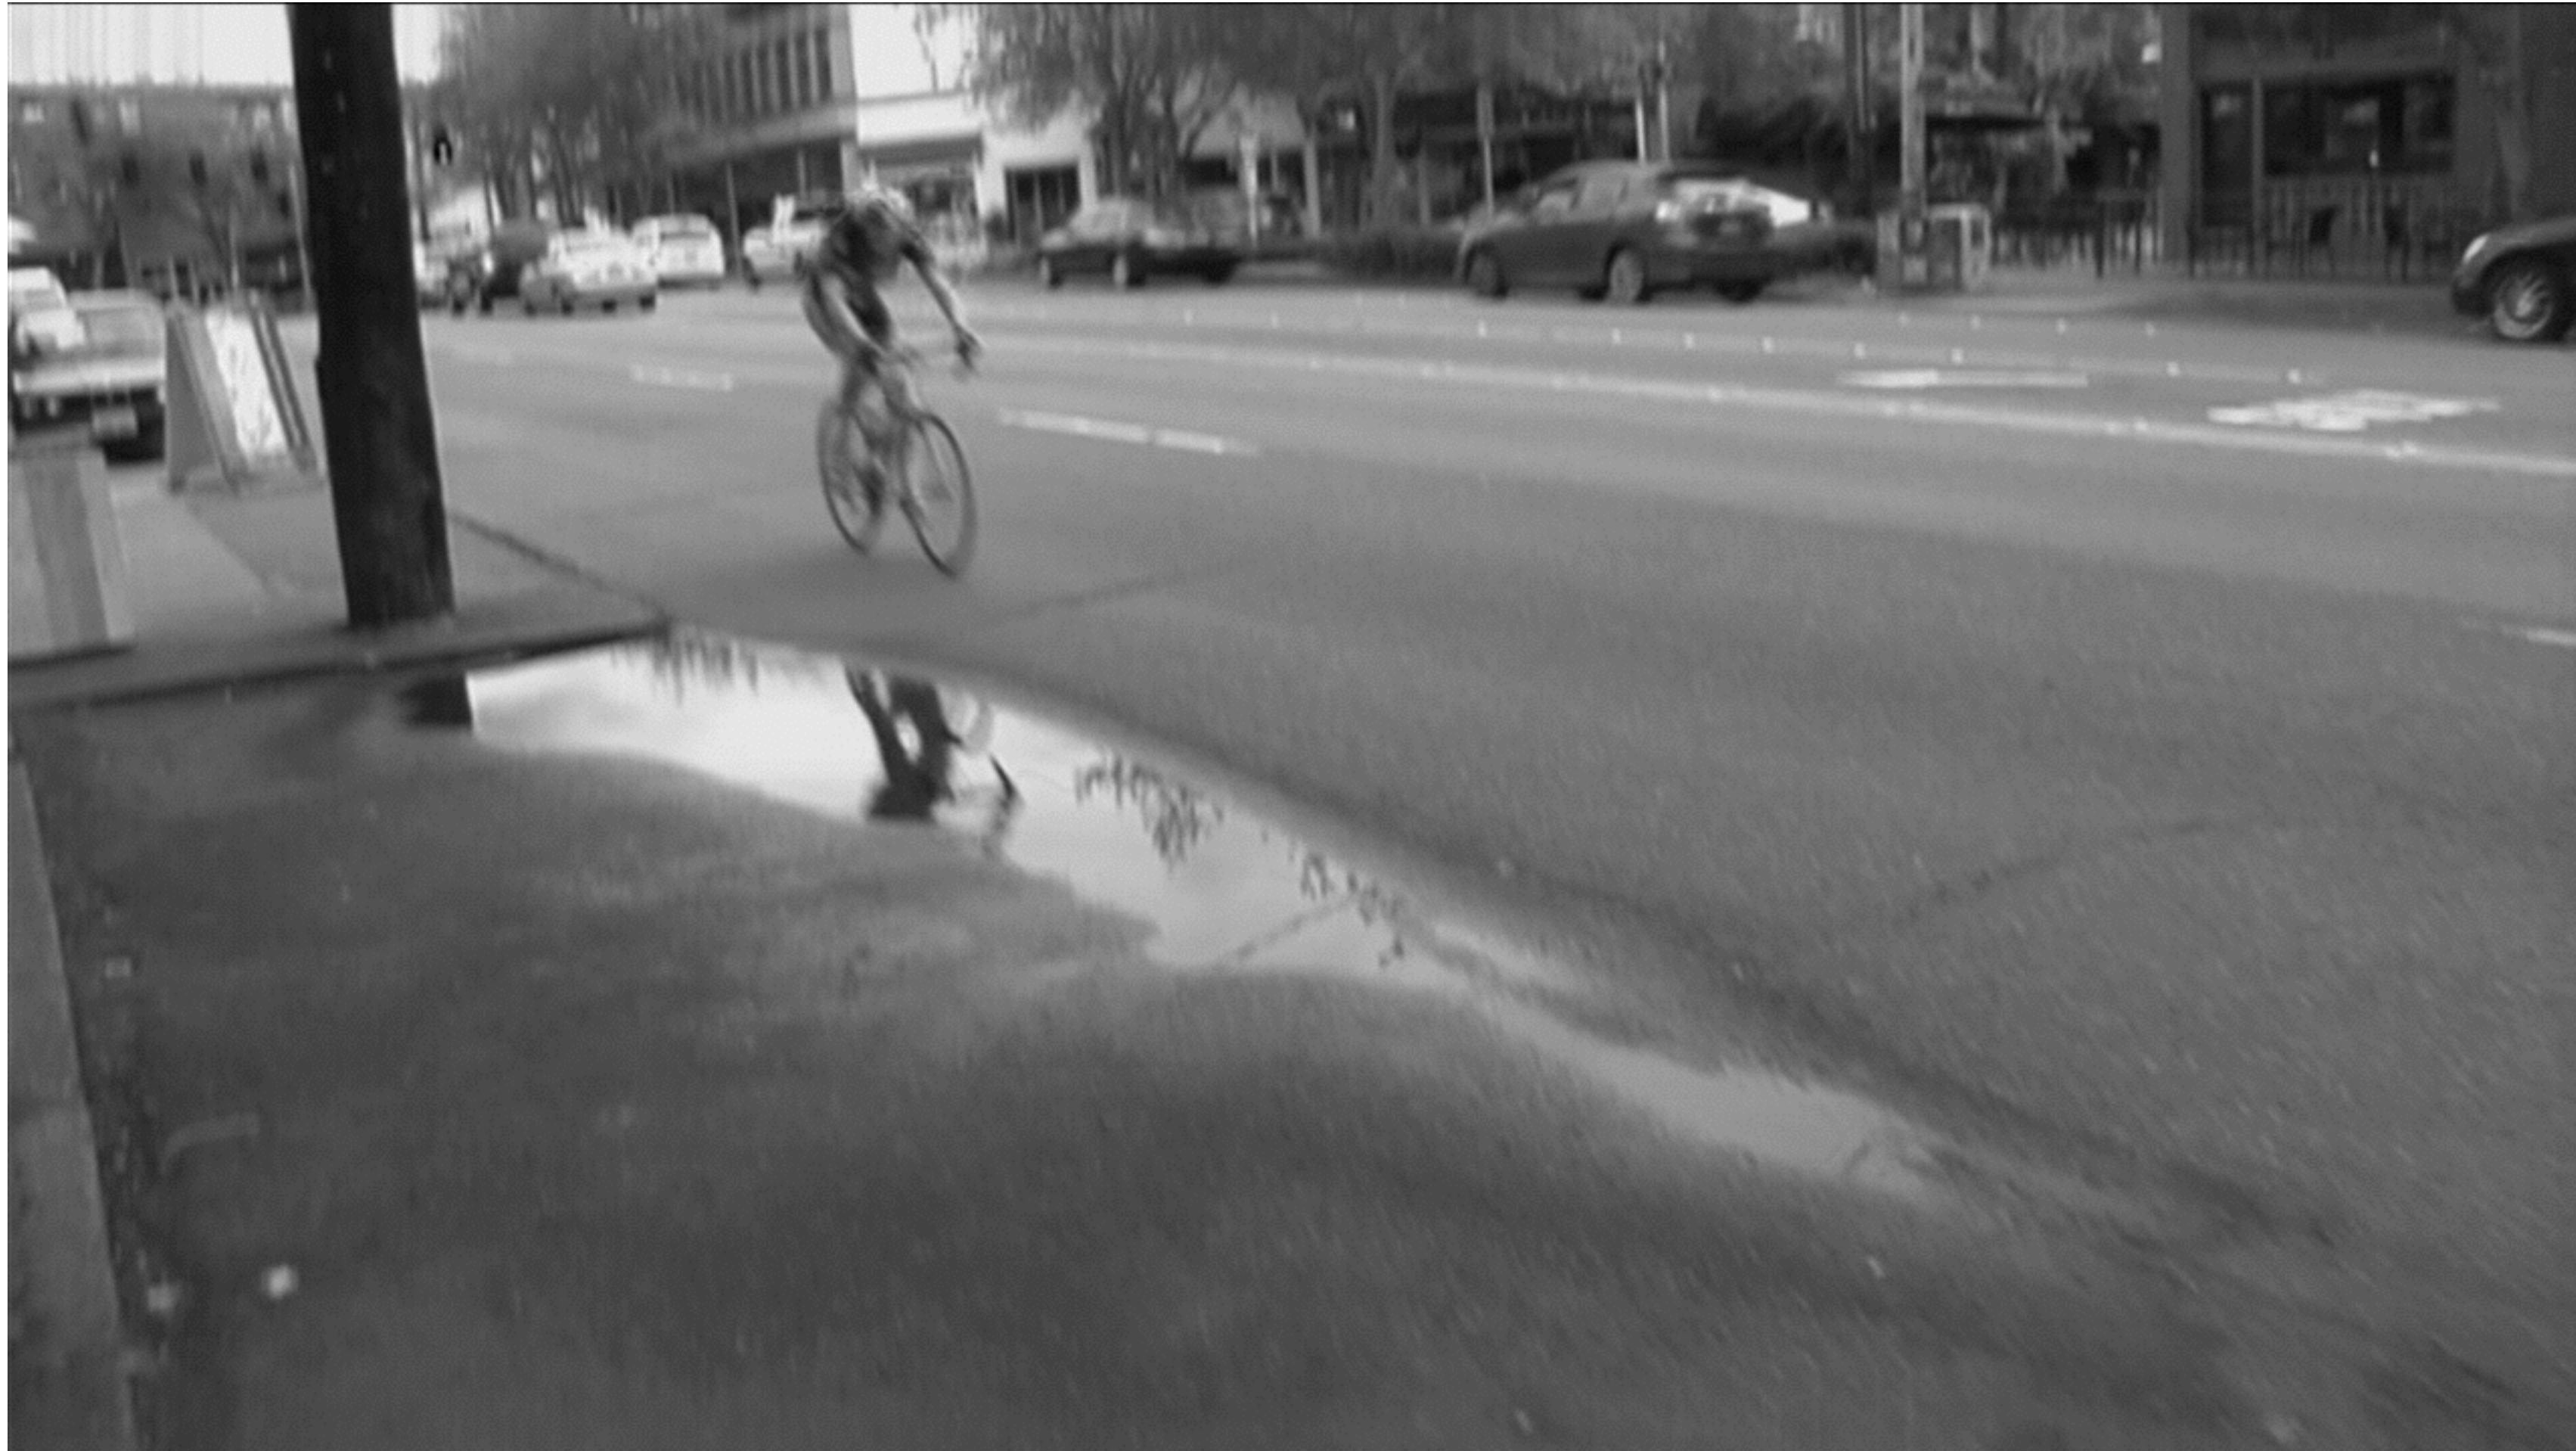

Filters and responses from F0 at DBN+Flow, that appear to find color channel correspondences.



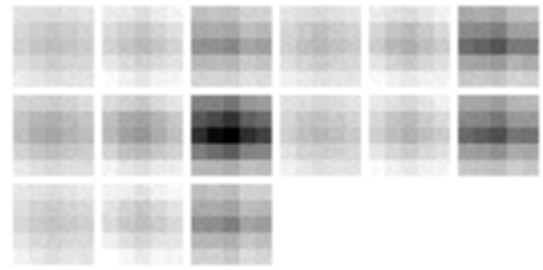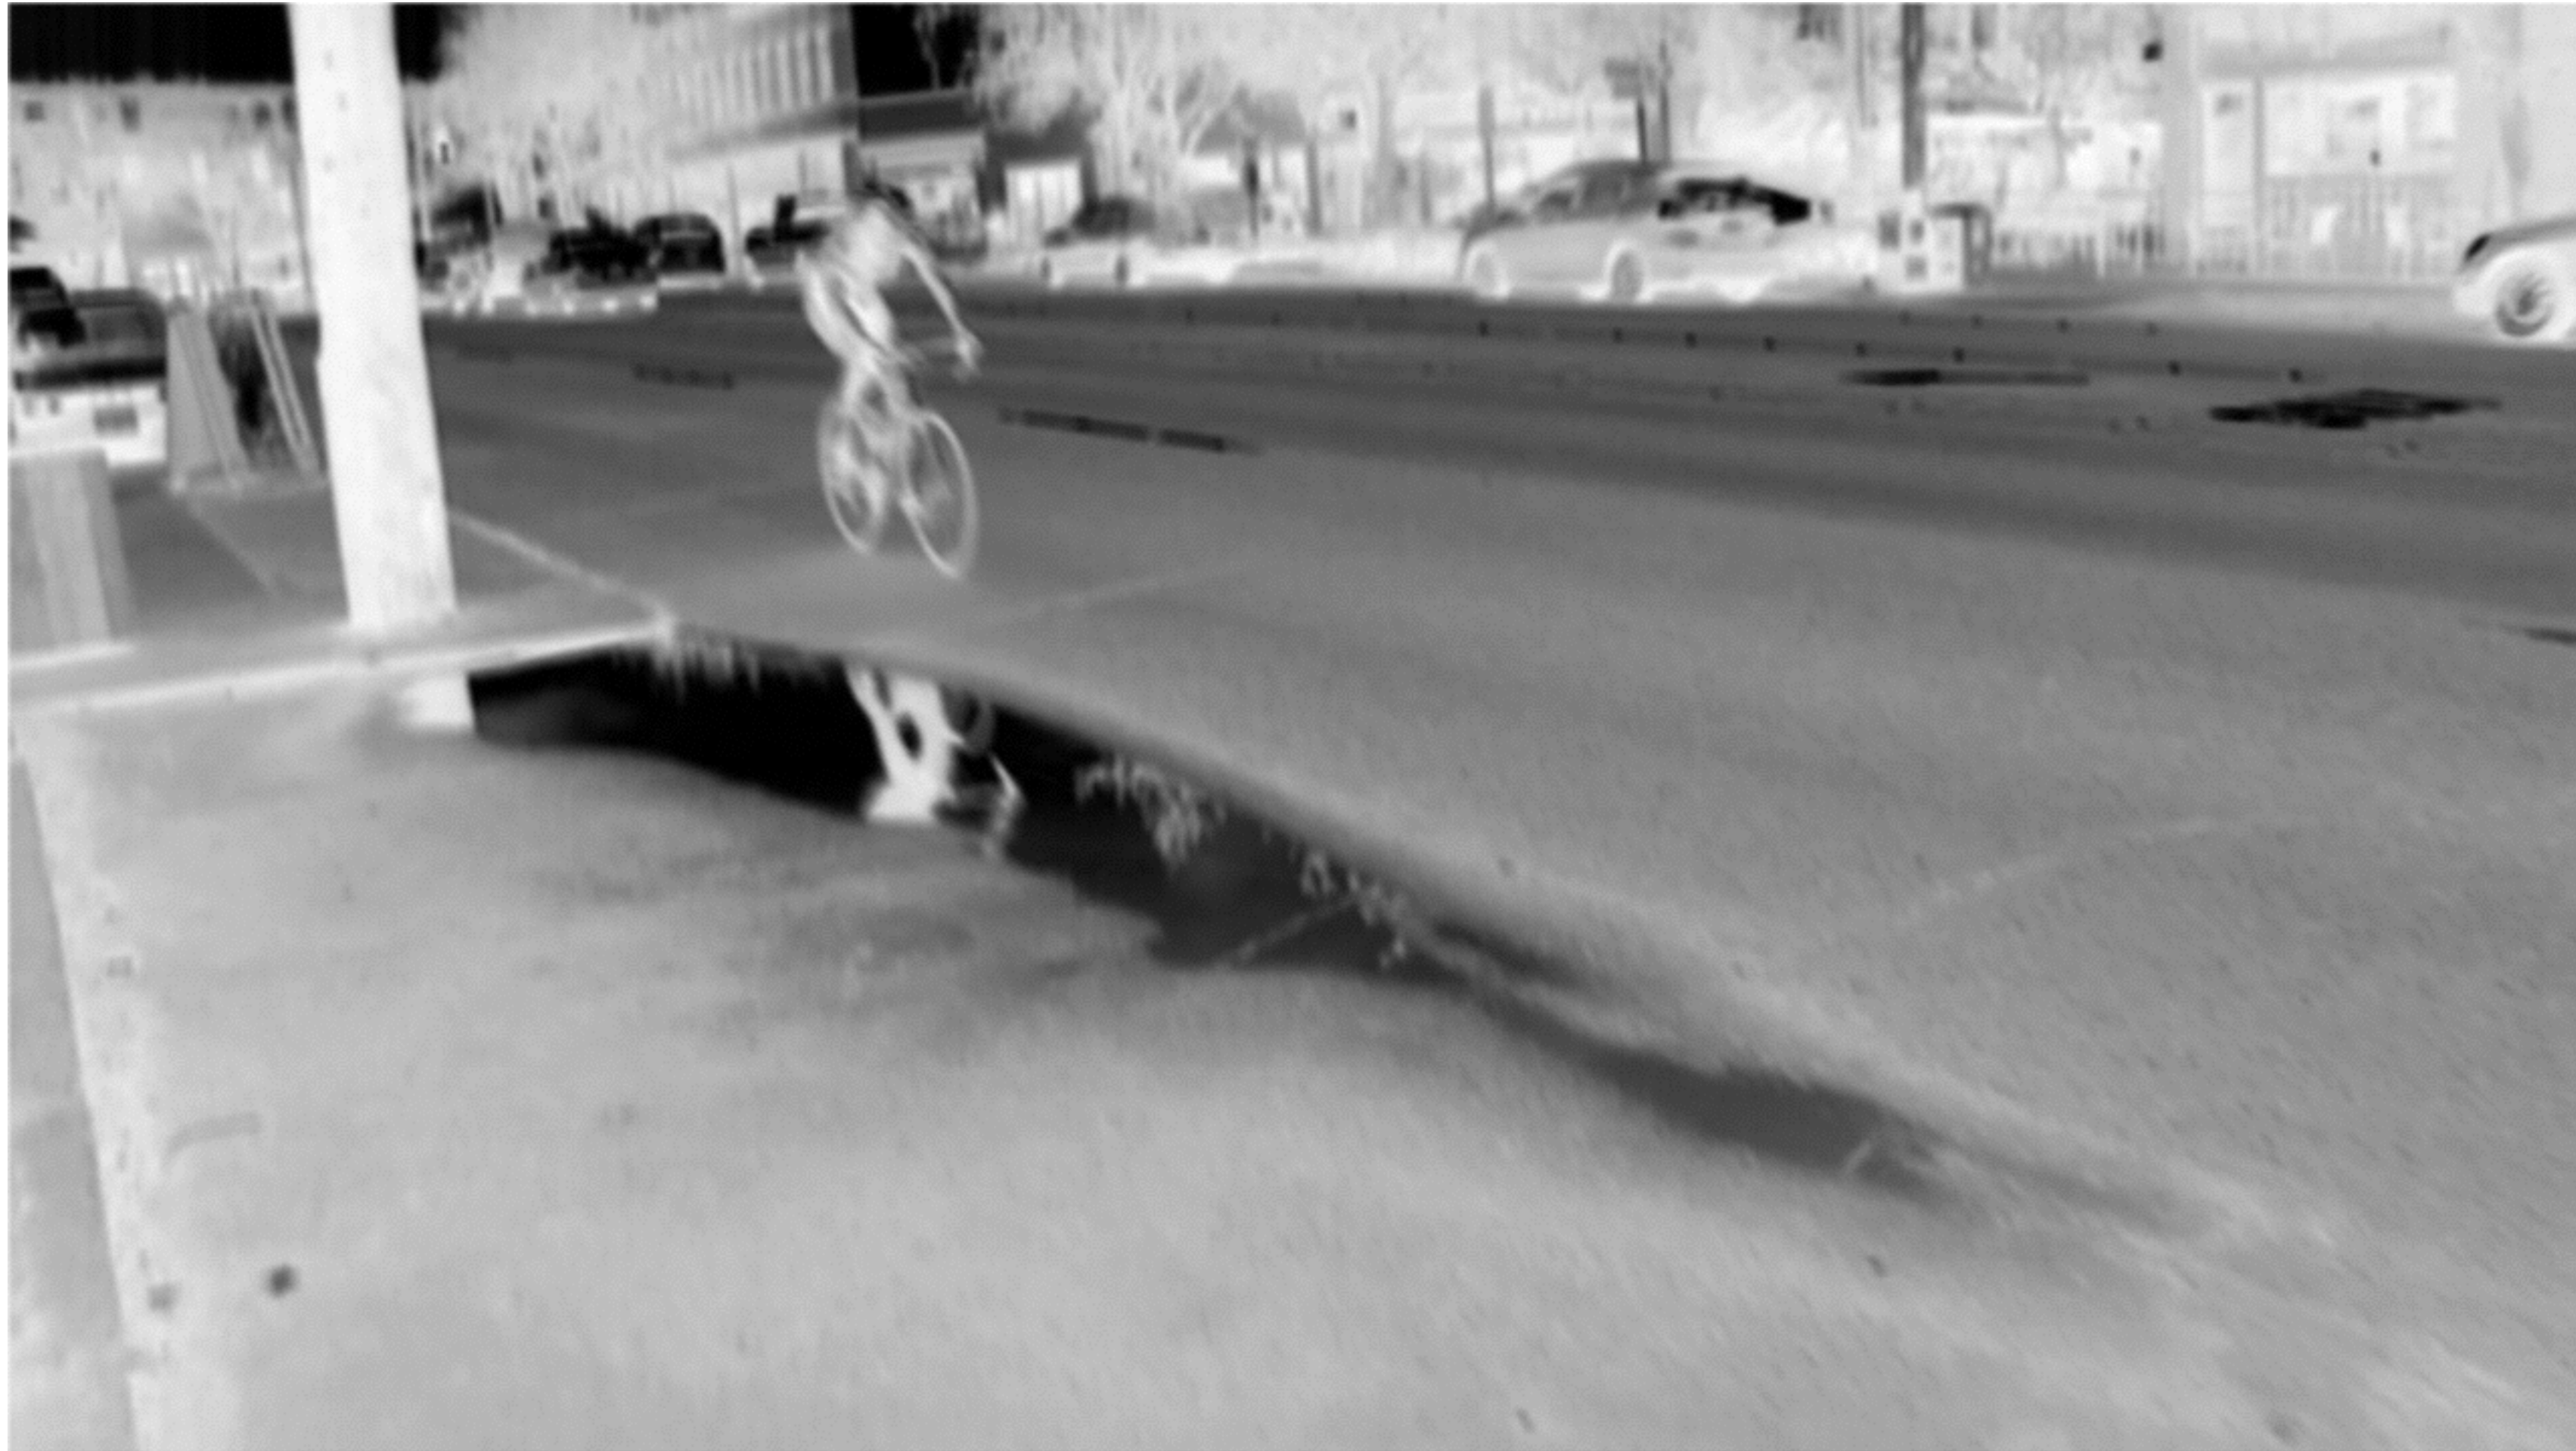

Filters and responses from F0 at DBN+Flow, that appear to find color channel correspondences.



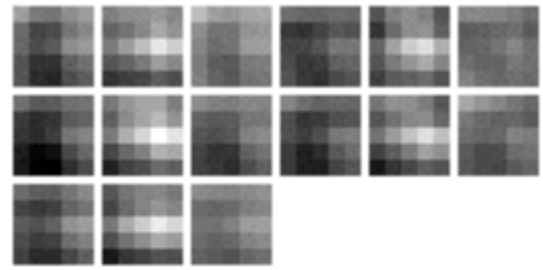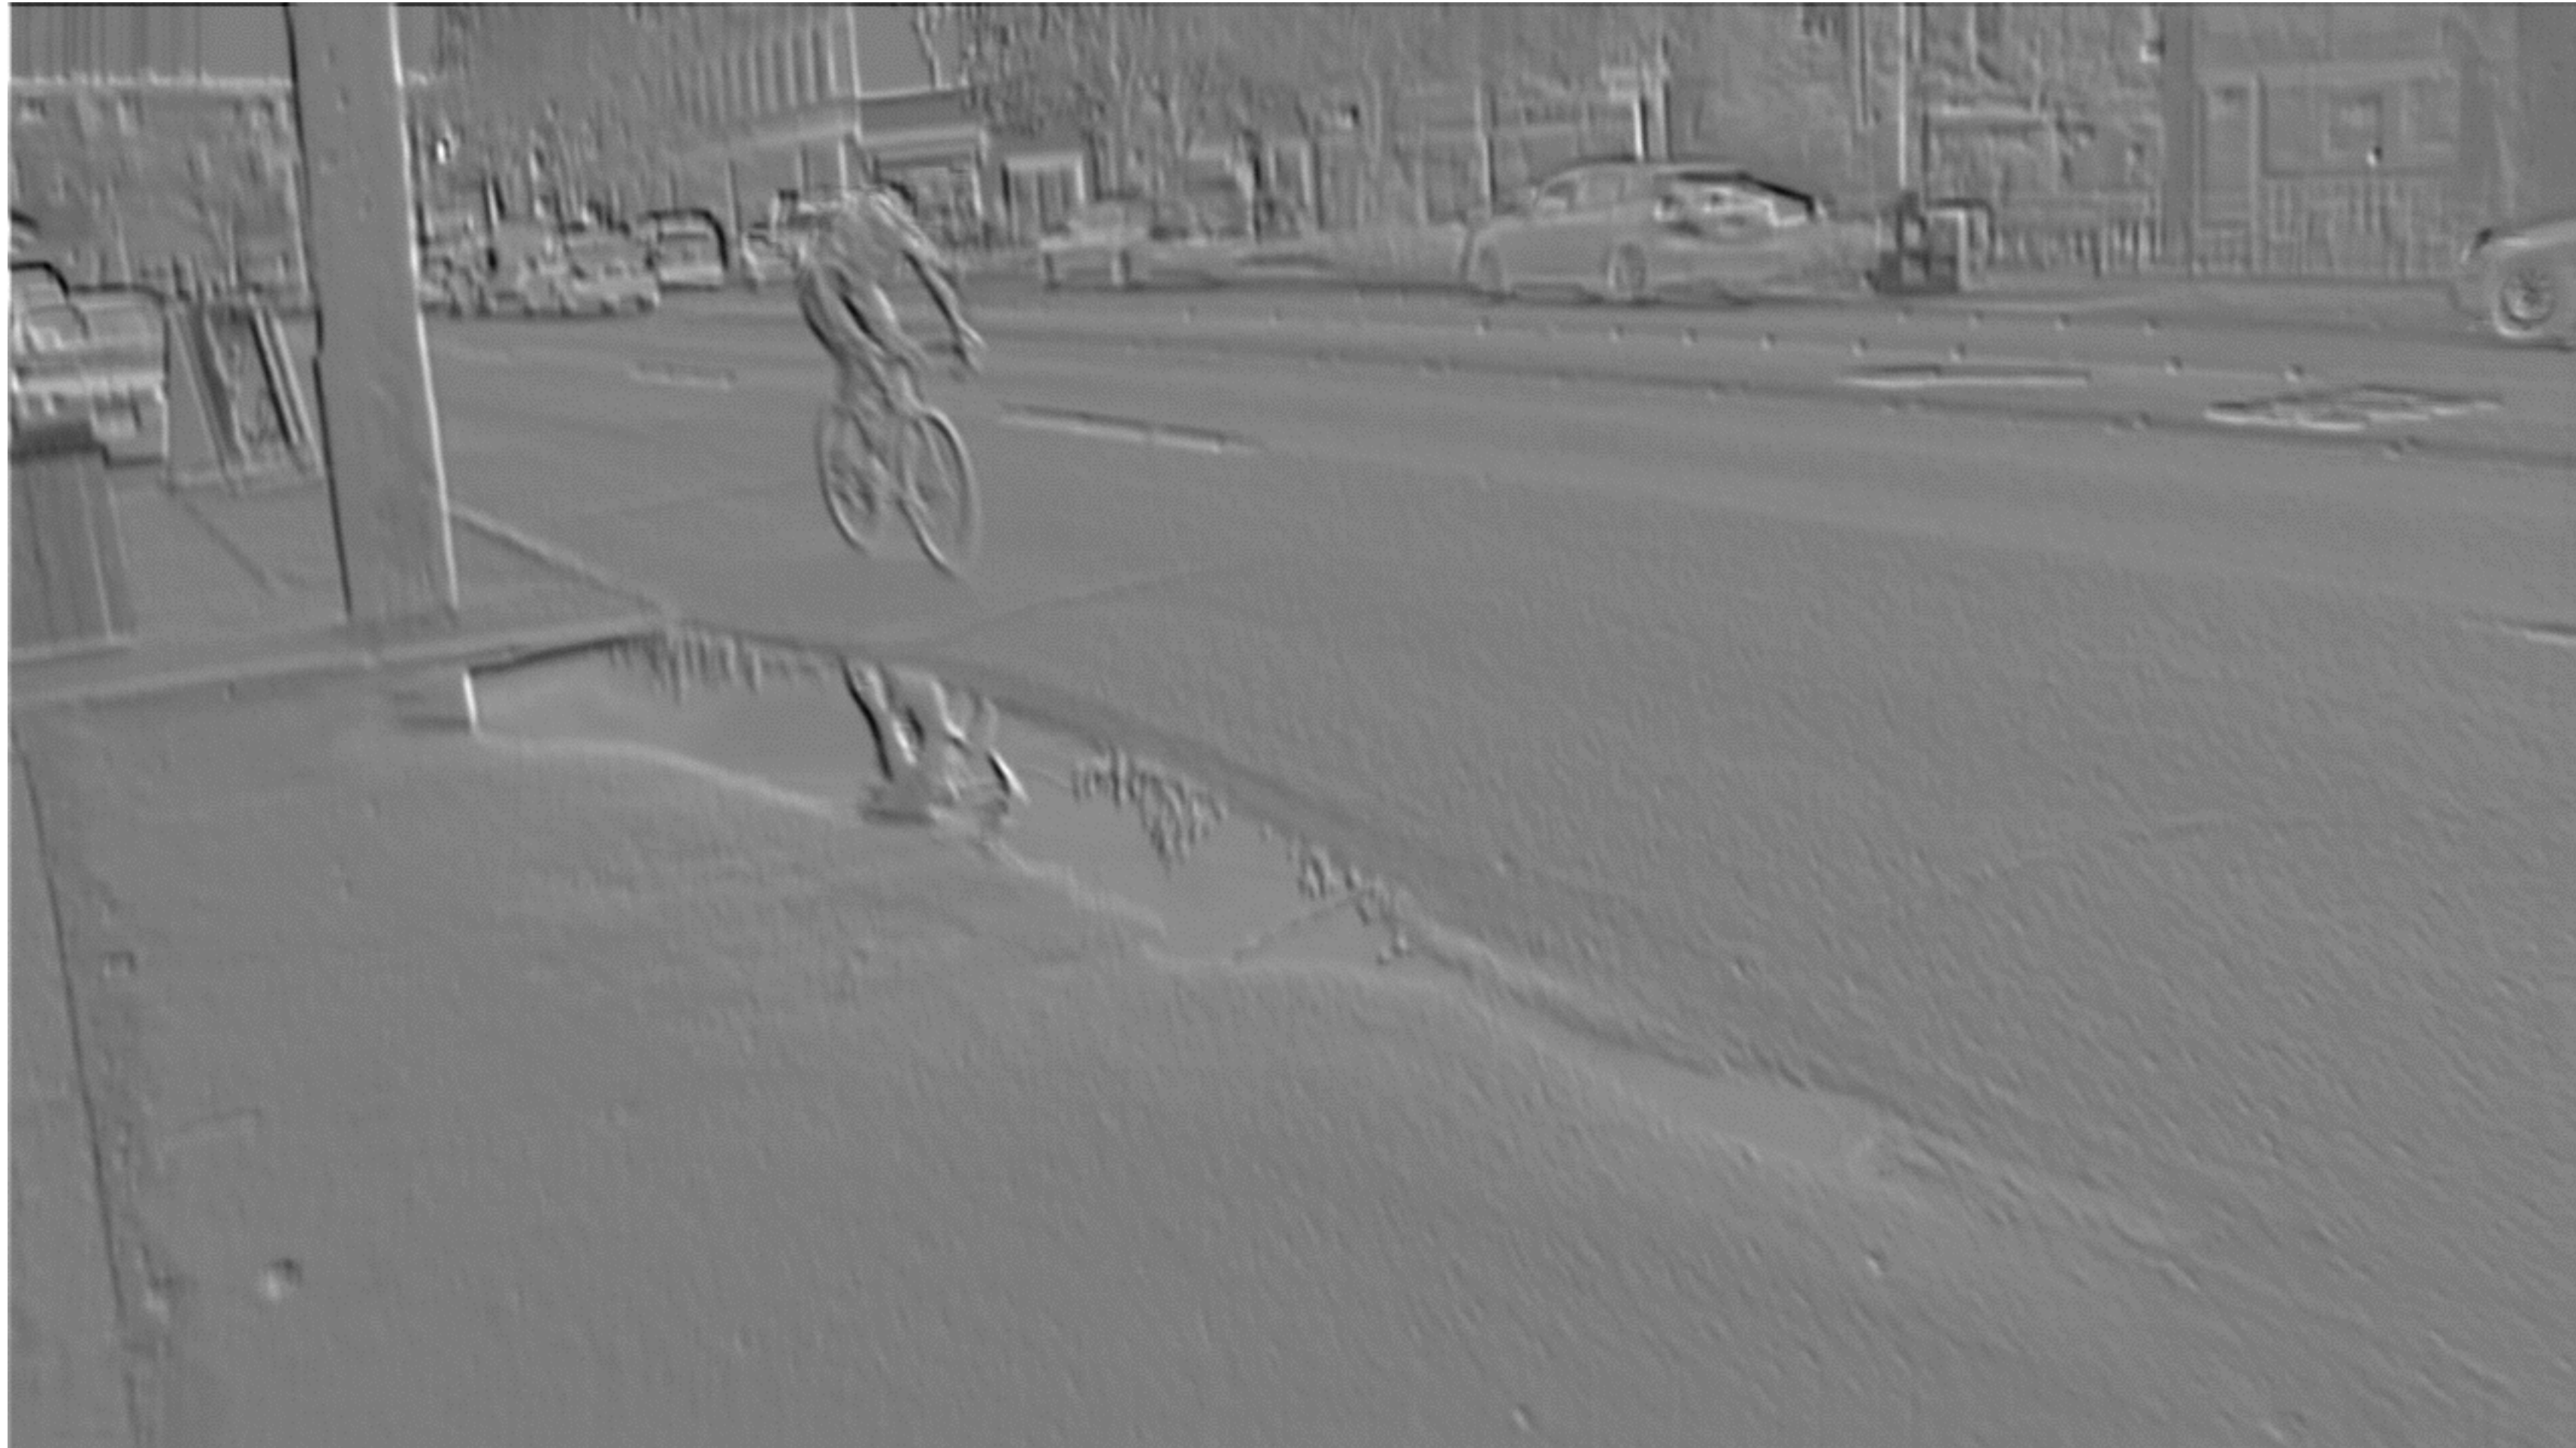

Filters and responses from F0 at DBN+Flow, that appear to find edges.



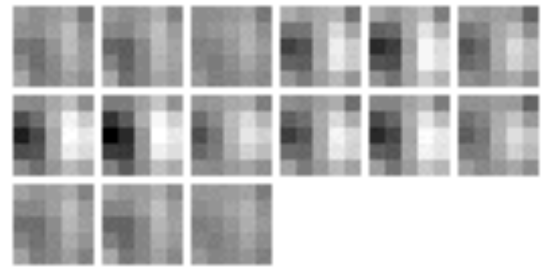

## Edges

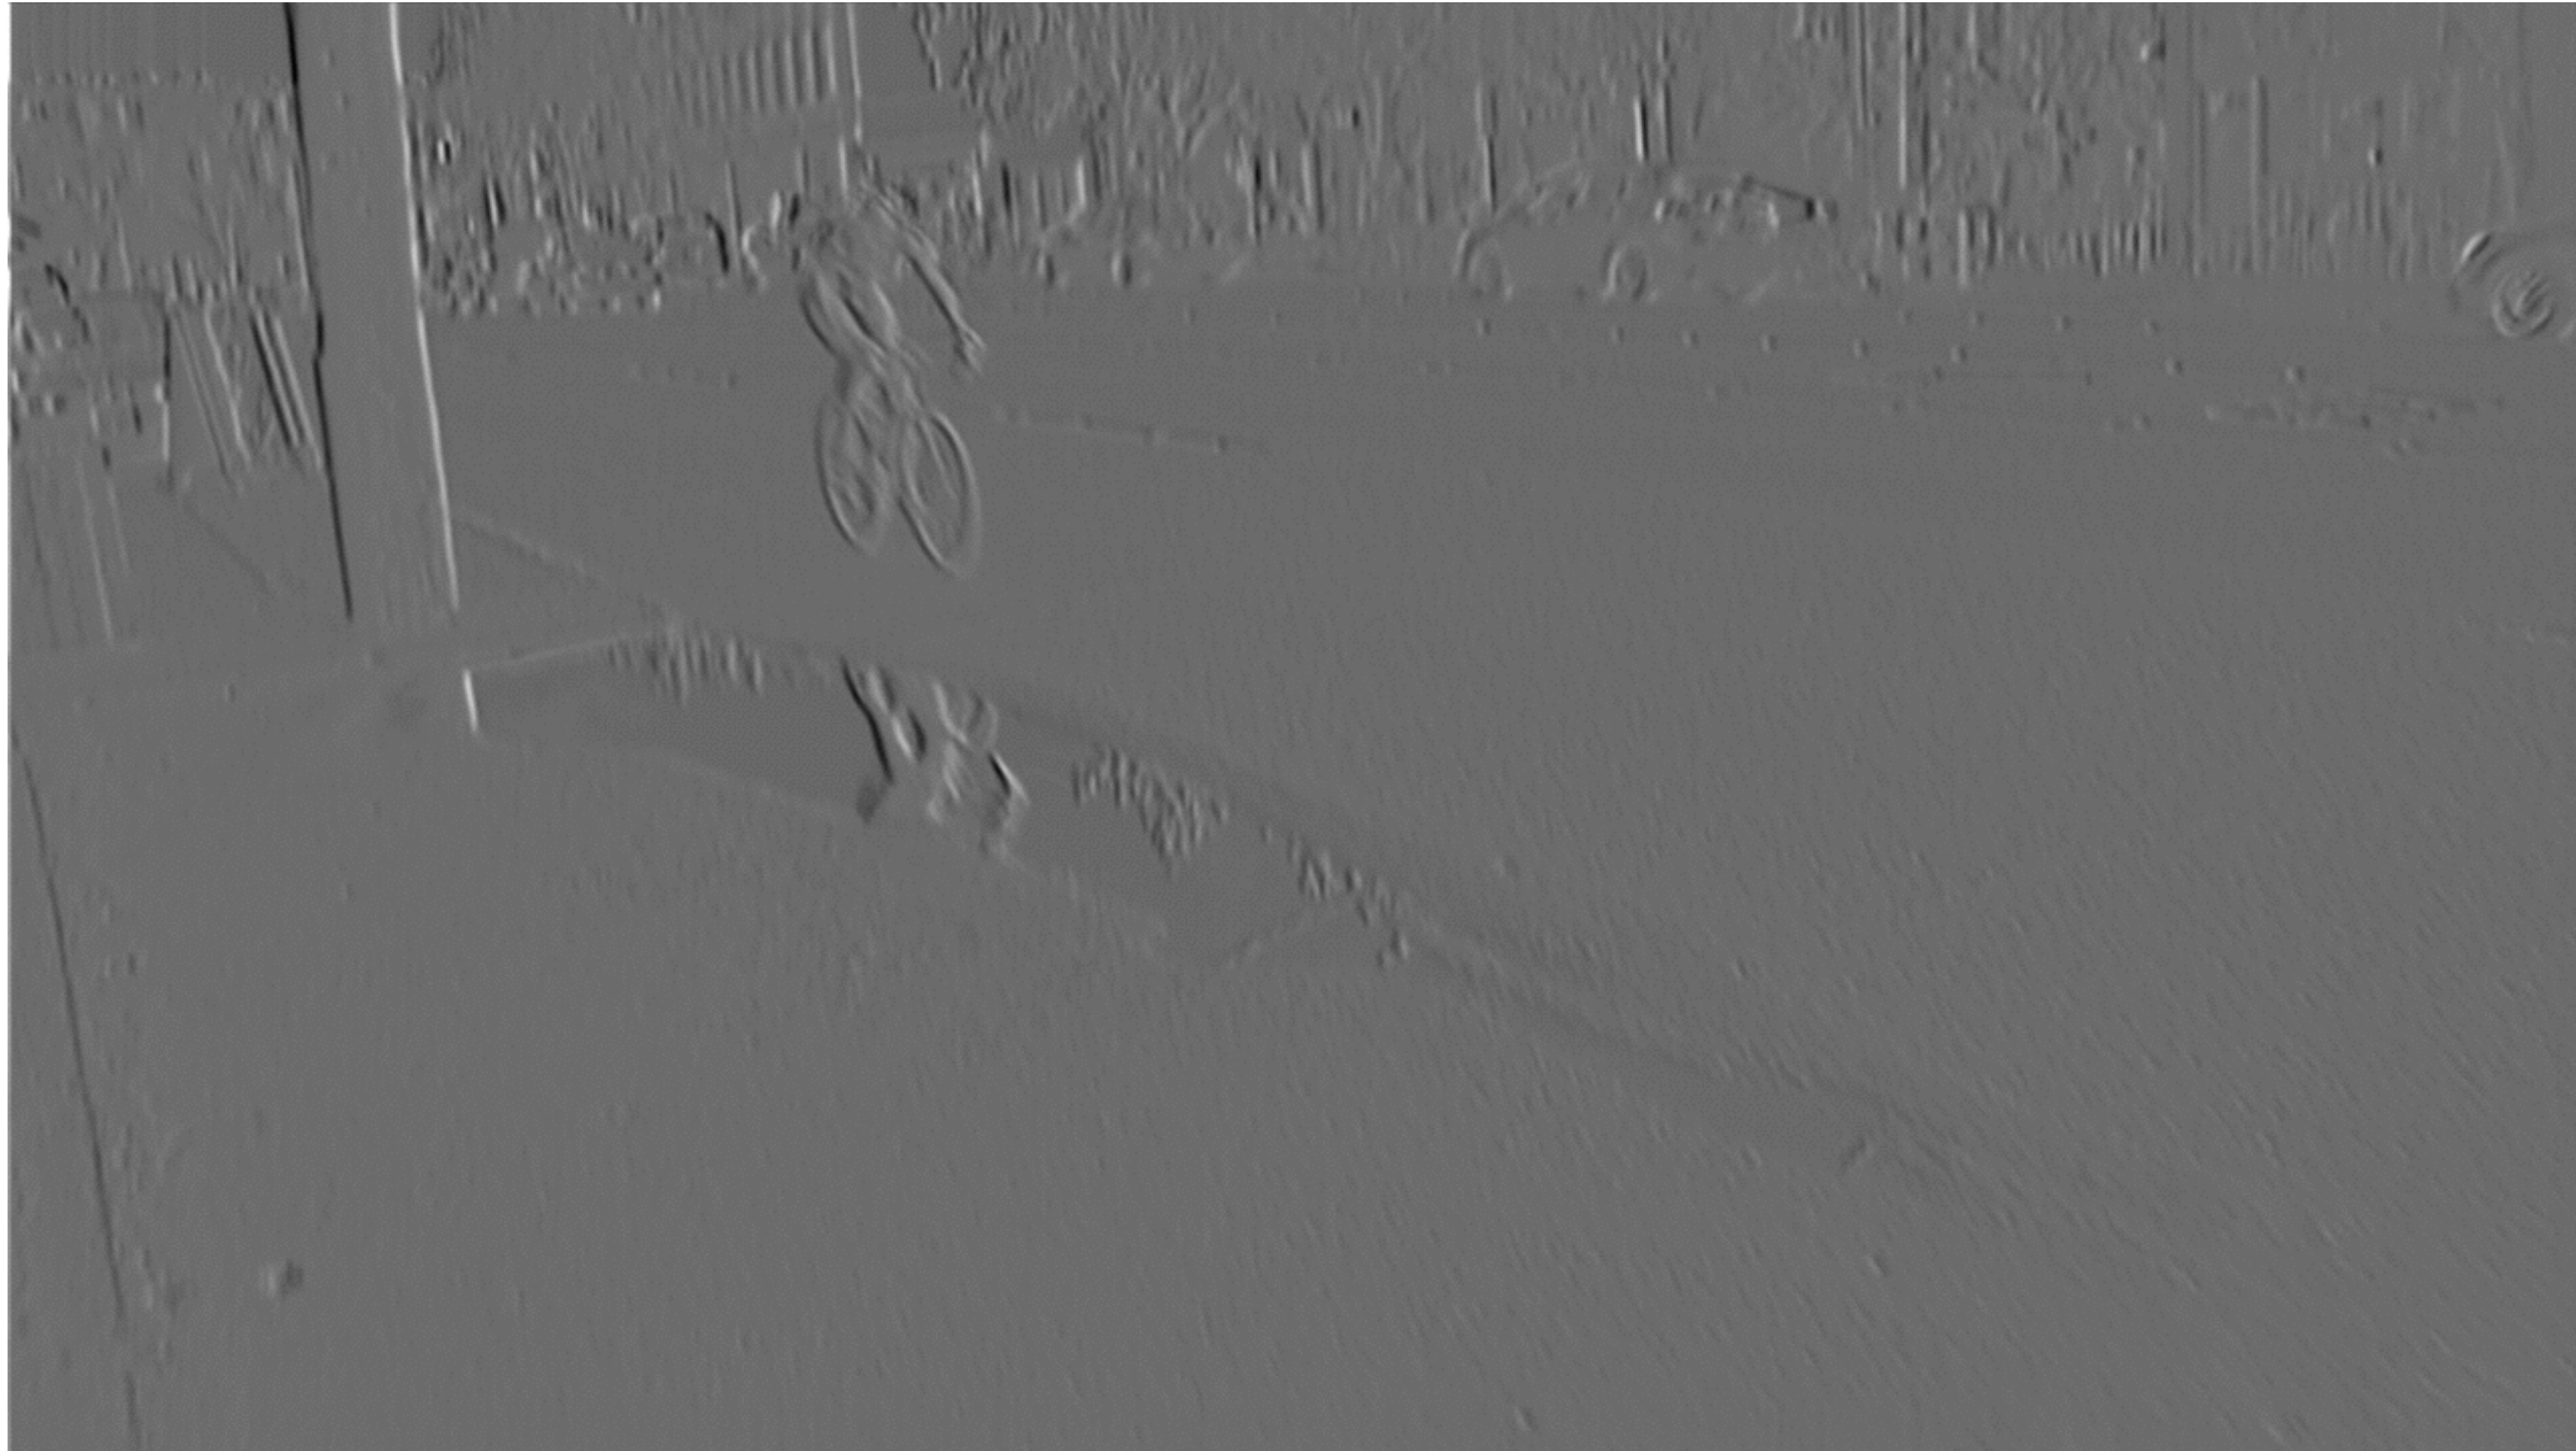

Filters and responses from F0 at DBN+Flow, that appear to find edges.



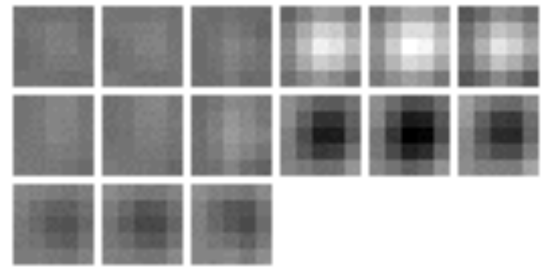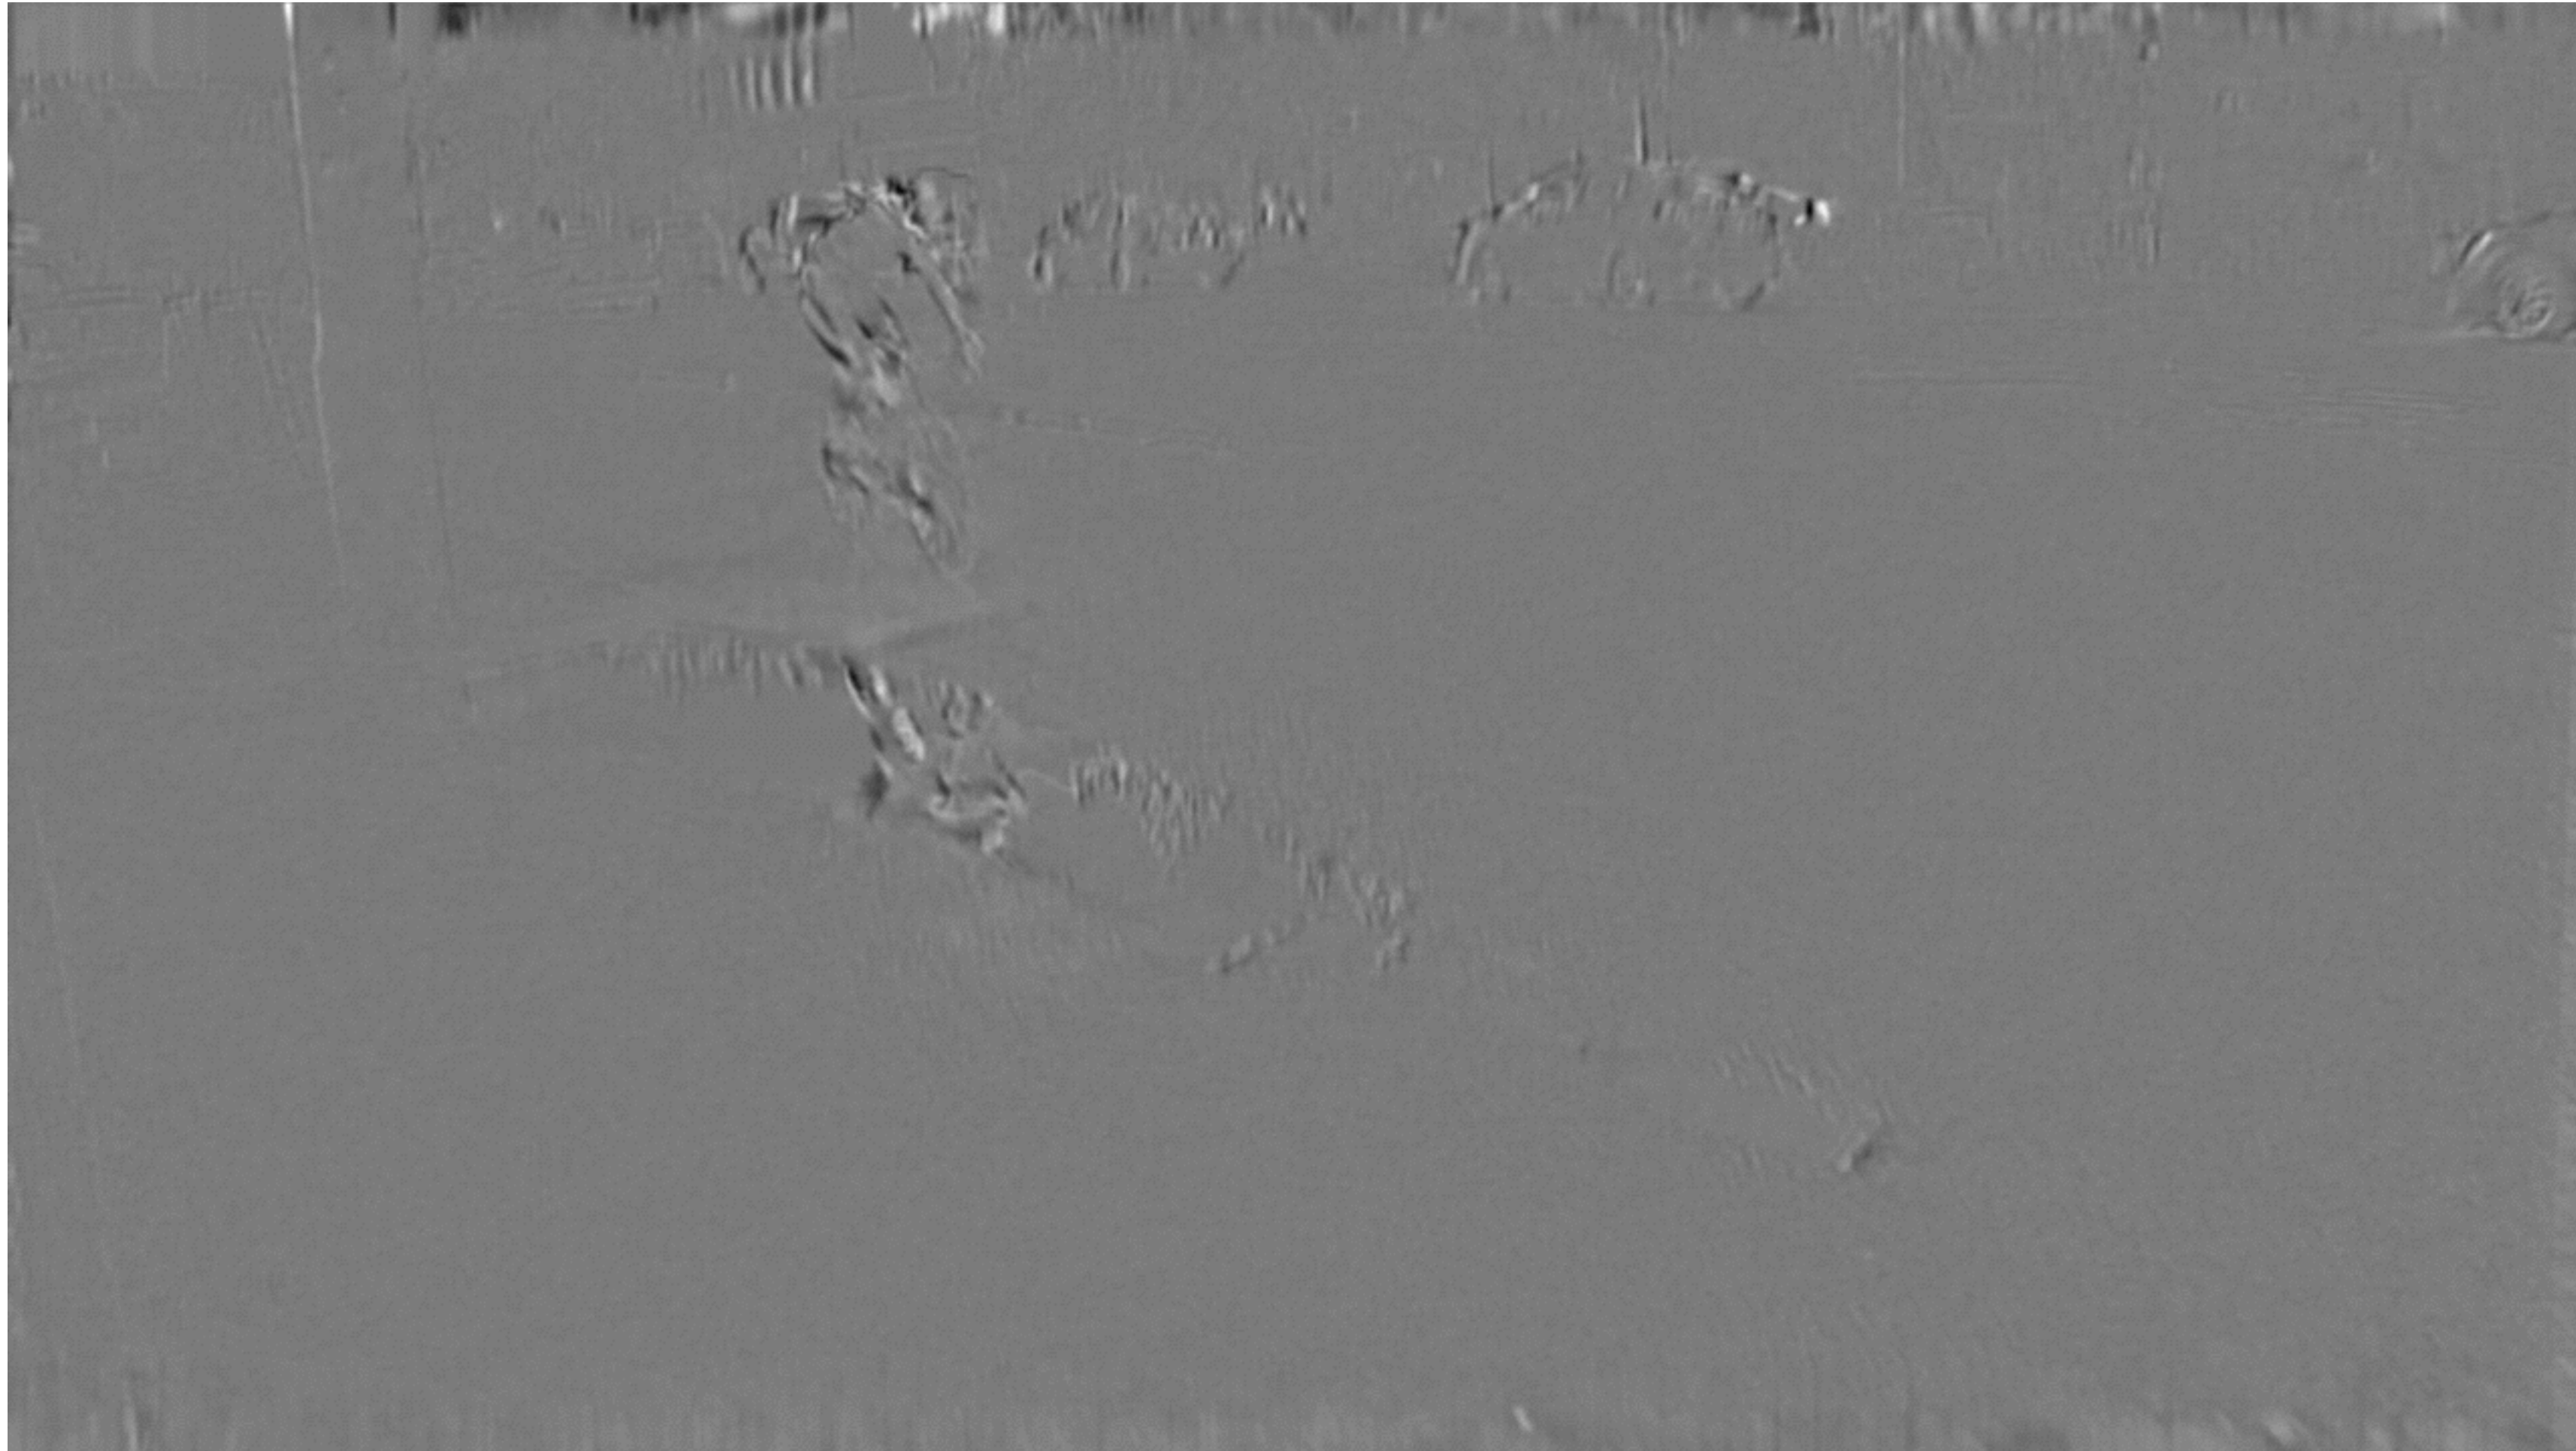

Filters and responses from F0 at DBN+Flow, that appear to detect warping artifacts.



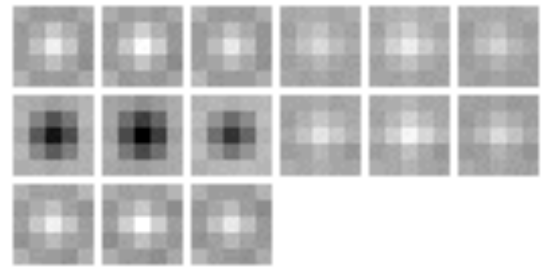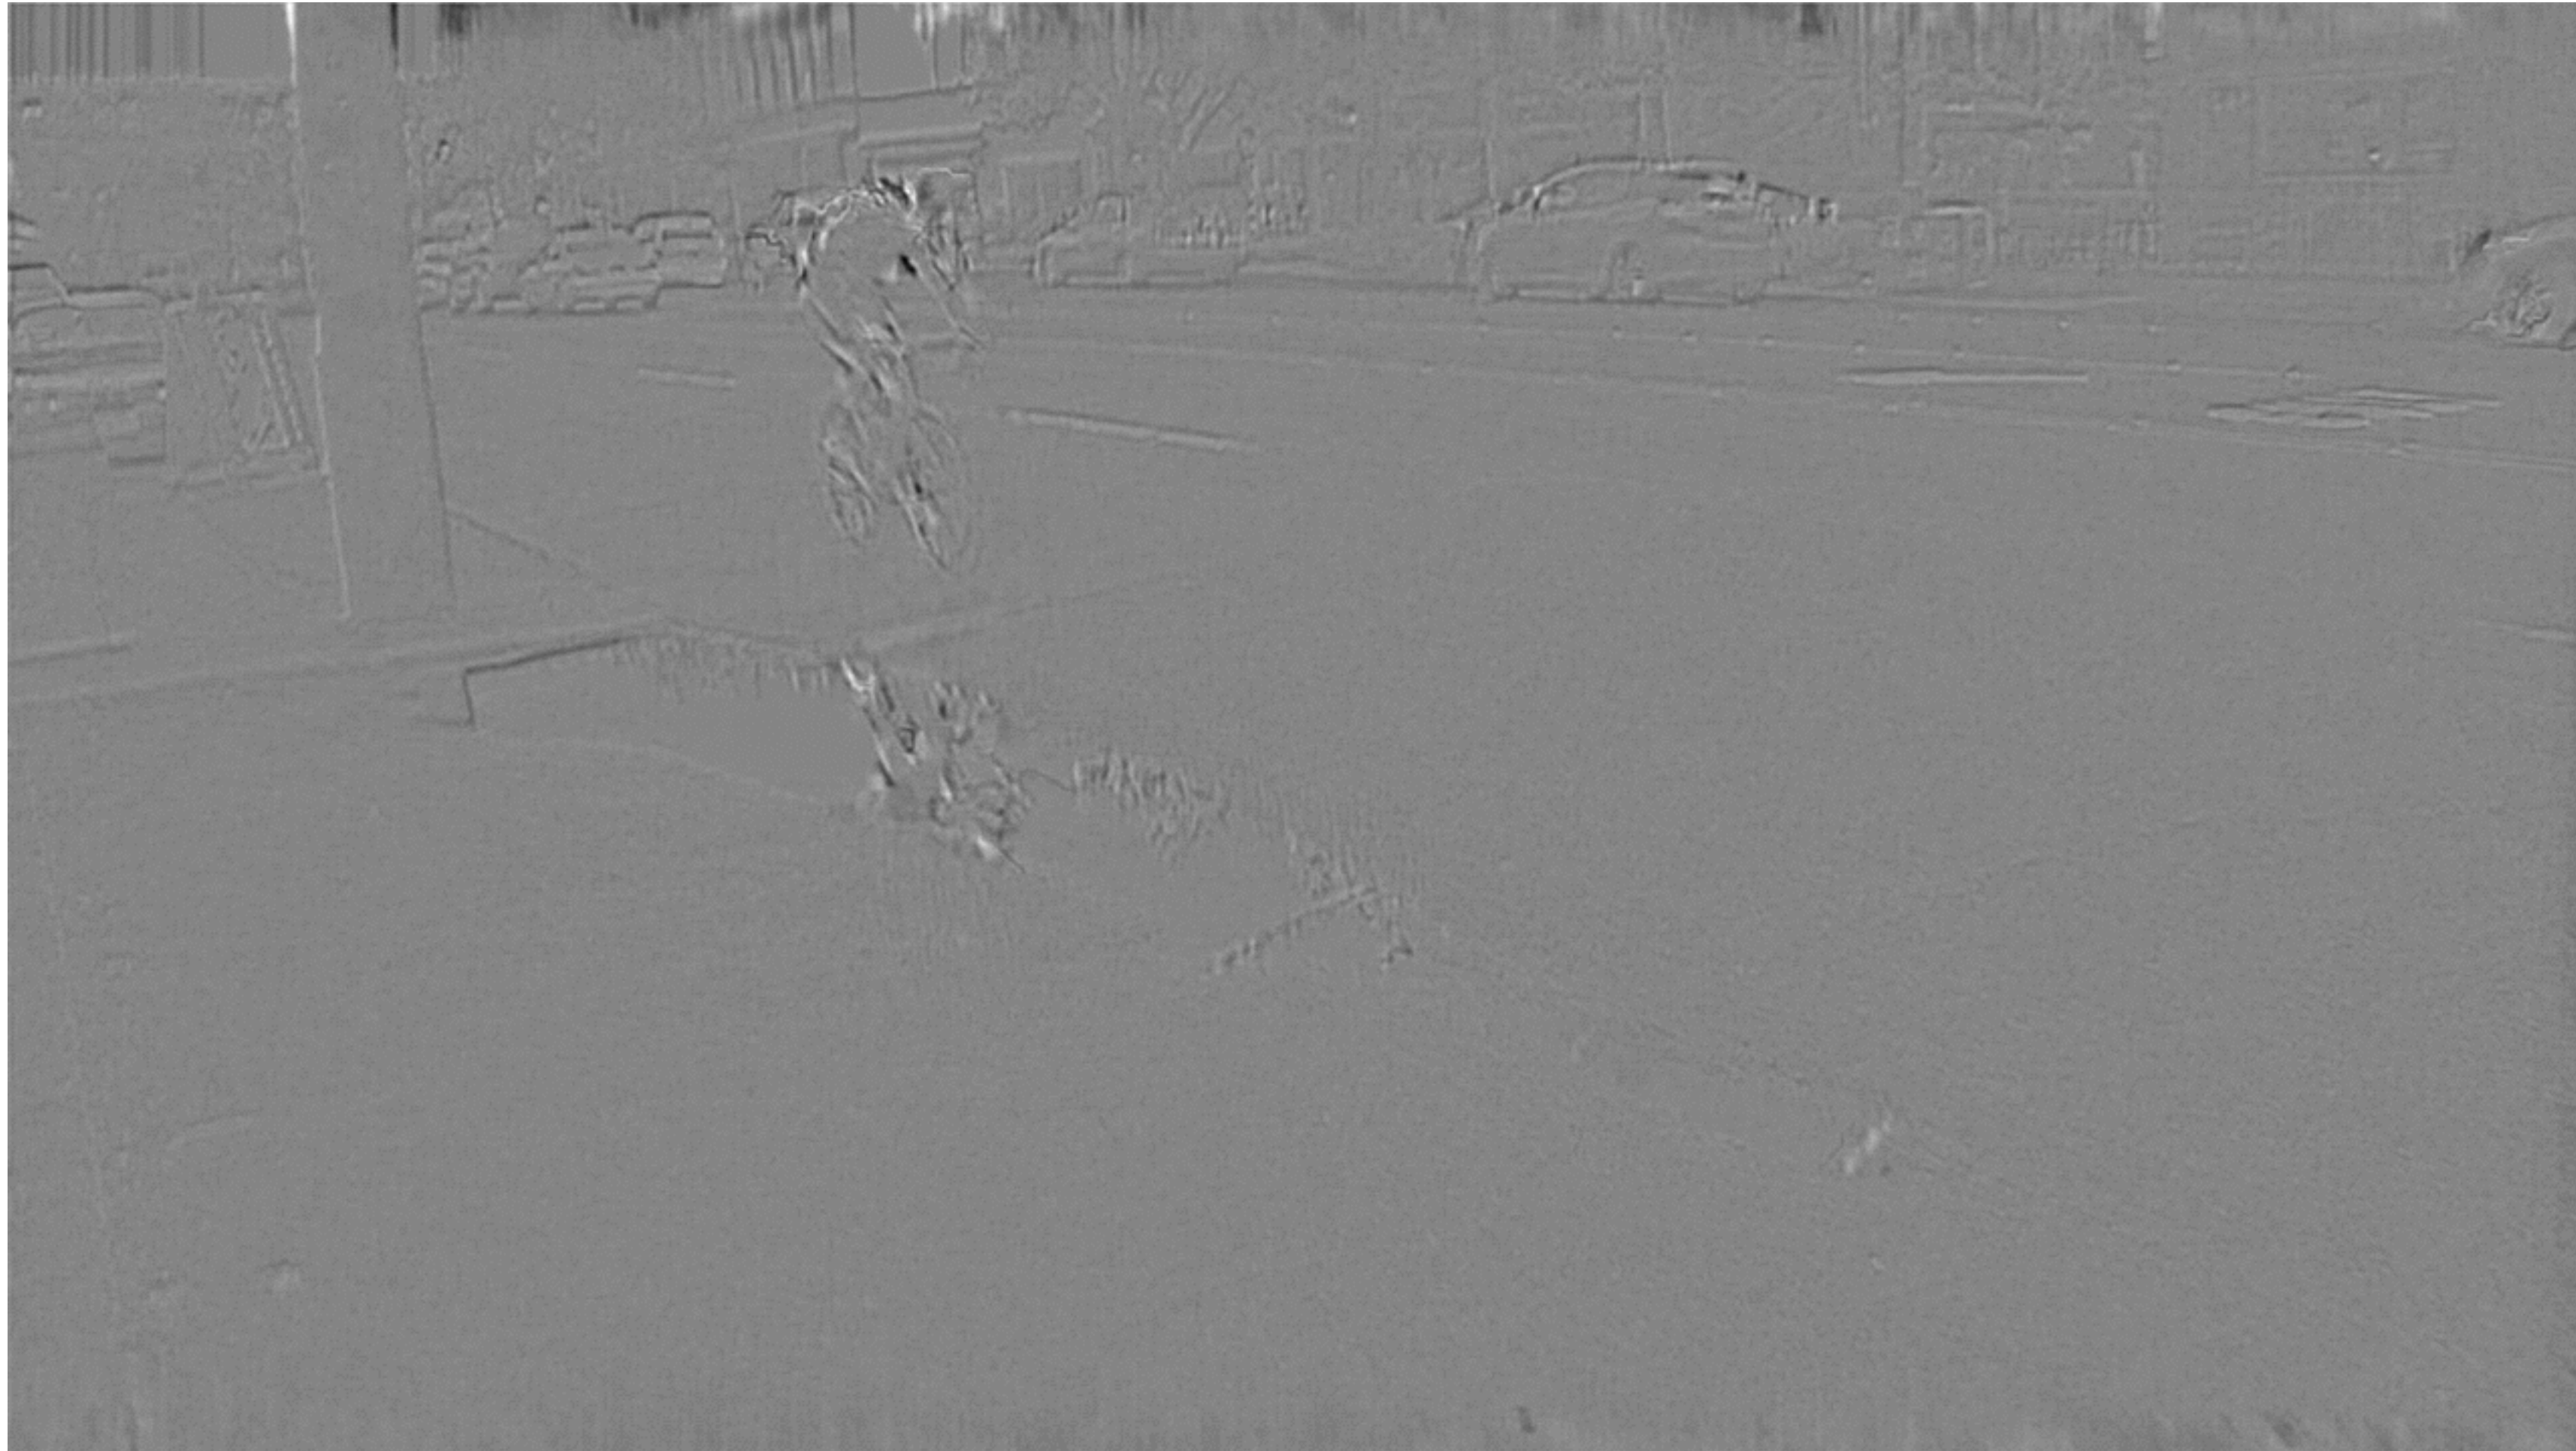

Filters and responses from F0 at DBN+Flow, that appear to detect warping artifacts.



# Convergence

- A convergence plot is given here.



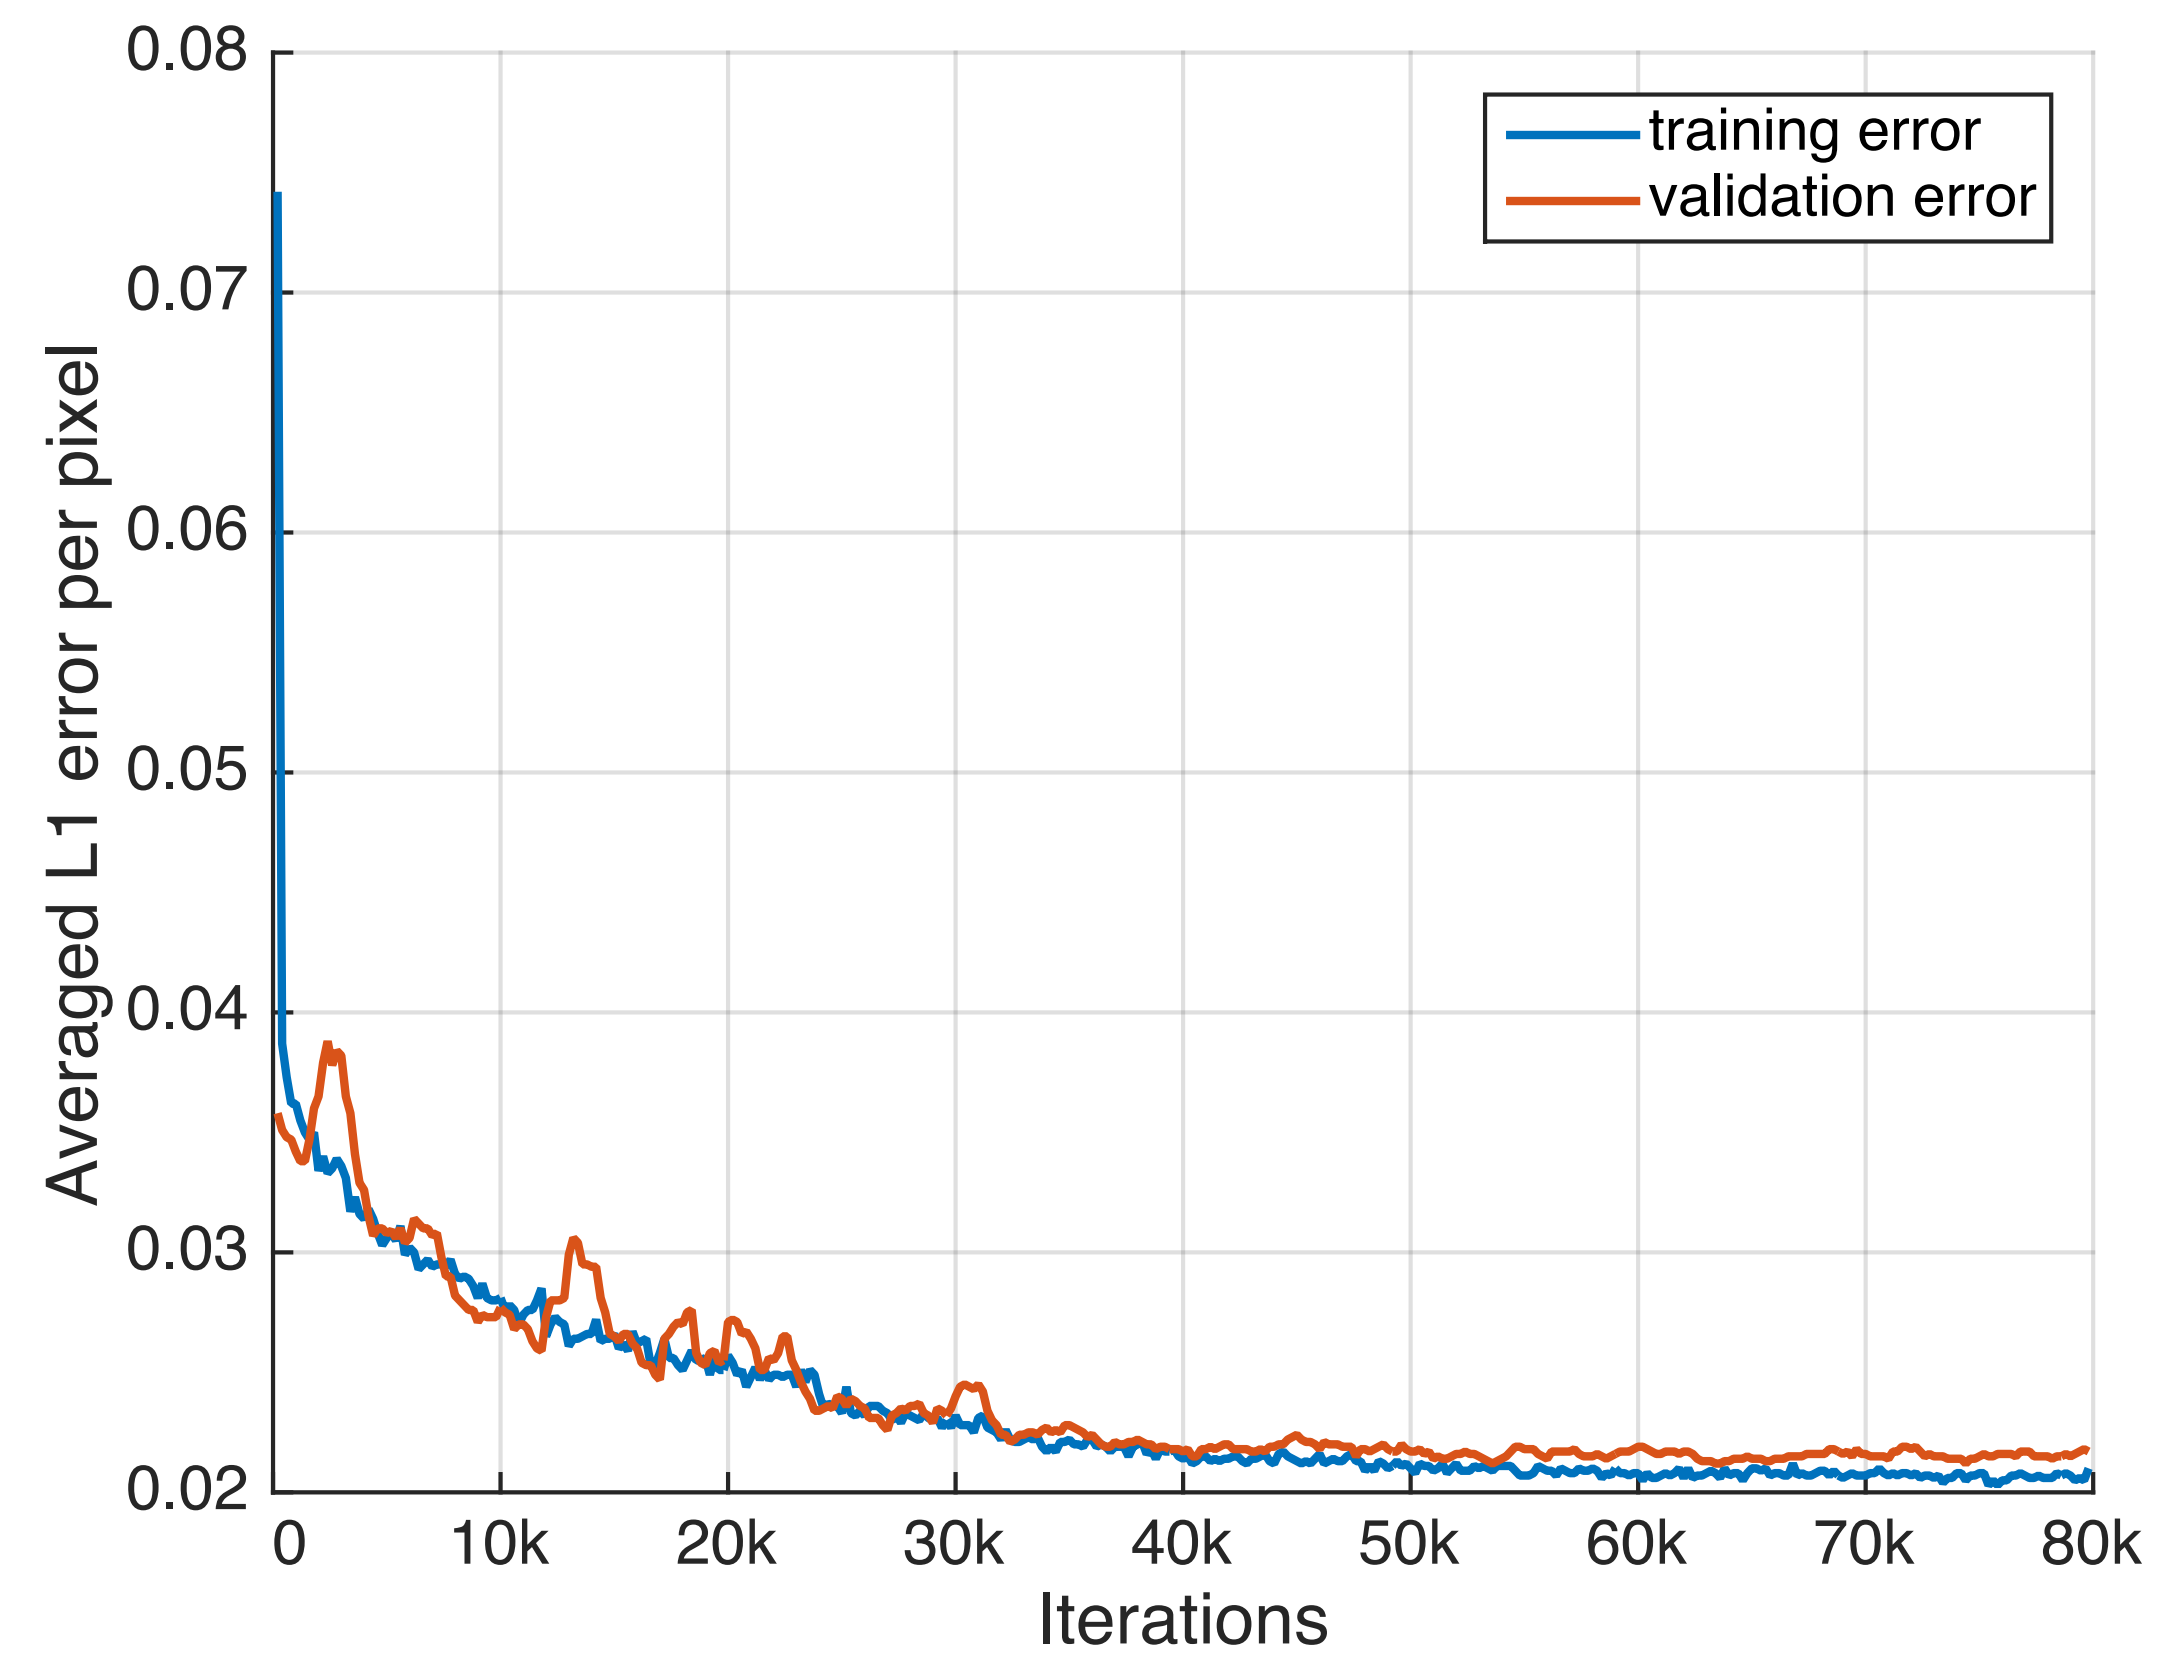

Convergence, DBN+Flow
